# Supplementary material
Source: MDPI journal article supplement (https://www.mdpi.com/2075-163X/9/6/373)
Supplement: s1 [file s1]

# checkCIF/PLATON report

Structure factors have been supplied for datablock(s) UAD\_-173\_uracdih\_100k

THIS REPORT IS FOR GUIDANCE ONLY. IF USED AS PART OF A REVIEW PROCEDURE FOR PUBLICATION, IT SHOULD NOT REPLACE THE EXPERTISE OF AN EXPERIENCED CRYSTALLOGRAPHIC REFEREE.

No syntax errors found.      CIF dictionary      Interpreting this report

## Datablock: UAD\_-173\_uracdih\_100k

---

Bond precision:      = 0.0000 A      Wavelength=1.54184

Cell:      a=7.2559(4)      b=6.3669(4)      c=17.4739(13)  
            alpha=90      beta=90.036(6)      gamma=90

Temperature:      100 K

|                | Calculated           | Reported             |
|----------------|----------------------|----------------------|
| Volume         | 807.25(9)            | 807.25(9)            |
| Space group    | P 21/c               | P 1 21/c 1           |
| Hall group     | -P 2ybc              | -P 2ybc              |
| Moiety formula | C5 H4 N4 O3, 2(H2 O) | C5 H4 N4 O3, 2(H2 O) |
| Sum formula    | C5 H8 N4 O5          | C5 H8 N4 O5          |
| Mr             | 204.15               | 204.15               |
| Dx,g cm-3      | 1.680                | 1.680                |
| Z              | 4                    | 4                    |
| Mu (mm-1)      | 1.321                | 1.321                |
| F000           | 424.0                | 424.0                |
| F000'          | 425.73               |                      |
| h,k,lmax       | 8,7,21               | 8,7,21               |
| Nref           | 1531                 | 1518                 |
| Tmin,Tmax      | 0.912,0.971          | 0.729,1.000          |
| Tmin'          | 0.903                |                      |

Correction method= # Reported T Limits: Tmin=0.729 Tmax=1.000  
AbsCorr = MULTI-SCAN

Data completeness= 0.992      Theta(max)= 69.983

R(reflections)= 0.0475( 1265)      wR2(reflections)= 0.1304( 1518)

S = 1.059      Npar= 166

---

The following ALERTS were generated. Each ALERT has the format  
**test-name\_ALERT\_alert-type\_alert-level.**  
Click on the hyperlinks for more details of the test.



### Alert level C

|                   |                                                                |       |        |
|-------------------|----------------------------------------------------------------|-------|--------|
| PLAT088_ALERT_3_C | Poor Data / Parameter Ratio .....                              | 9.14  | Note   |
| PLAT355_ALERT_3_C | Long O-H (X0.82,N0.98A) Ow2 - Hw2A .                           | 1.01  | Ang.   |
| PLAT790_ALERT_4_C | Centre of Gravity not Within Unit Cell: Resd. #<br>C5 H4 N4 O3 | 1     | Note   |
| PLAT906_ALERT_3_C | Large K Value in the Analysis of Variance .....                | 2.076 | Check  |
| PLAT911_ALERT_3_C | Missing FCF Refl Between Thmin & STh/L= 0.600                  | 8     | Report |



### Alert level G

|                   |                                                                |             |        |
|-------------------|----------------------------------------------------------------|-------------|--------|
| PLAT007_ALERT_5_G | Number of Unrefined Donor-H Atoms .....                        | 8           | Report |
| PLAT171_ALERT_4_G | The CIF-Embedded .res File Contains EADP Records               | 10          | Report |
| PLAT301_ALERT_3_G | Main Residue Disorder .....(Resd 1 )                           | 100%        | Note   |
| PLAT301_ALERT_3_G | Main Residue Disorder .....(Resd 2 )                           | 100%        | Note   |
| PLAT304_ALERT_4_G | Non-Integer Number of Atoms in ..... Resd 1                    | 9.41        | Check  |
| PLAT304_ALERT_4_G | Non-Integer Number of Atoms in ..... Resd 2                    | 6.59        | Check  |
| PLAT720_ALERT_4_G | Number of Unusual/Non-Standard Labels .....                    | 6           | Note   |
| PLAT790_ALERT_4_G | Centre of Gravity not Within Unit Cell: Resd. #<br>C5 H4 N4 O3 | 2           | Note   |
| PLAT790_ALERT_4_G | Centre of Gravity not Within Unit Cell: Resd. #<br>H2 O        | 3           | Note   |
| PLAT790_ALERT_4_G | Centre of Gravity not Within Unit Cell: Resd. #<br>H2 O        | 4           | Note   |
| PLAT811_ALERT_5_G | No ADDSYM Analysis: Too Many Excluded Atoms ....               | !           | Info   |
| PLAT870_ALERT_4_G | ALERTS Related to Twinning Effects Suppressed ..               | !           | Info   |
| PLAT883_ALERT_1_G | No Info/Value for _atom_sites_solution_primary .               | Please Do ! |        |
| PLAT912_ALERT_4_G | Missing # of FCF Reflections Above STh/L= 0.600                | 4           | Note   |
| PLAT931_ALERT_5_G | CIFcalcFCF Twin Law ( 0 0 1) Est.d BASF                        | 0.54        | Check  |
| PLAT933_ALERT_2_G | Number of OMIT Records in Embedded .res File ...               | 4           | Note   |

- 
- 0 **ALERT level A** = Most likely a serious problem - resolve or explain  
0 **ALERT level B** = A potentially serious problem, consider carefully  
5 **ALERT level C** = Check. Ensure it is not caused by an omission or oversight  
16 **ALERT level G** = General information/check it is not something unexpected
- 1 ALERT type 1 CIF construction/syntax error, inconsistent or missing data  
1 ALERT type 2 Indicator that the structure model may be wrong or deficient  
6 ALERT type 3 Indicator that the structure quality may be low  
10 ALERT type 4 Improvement, methodology, query or suggestion  
3 ALERT type 5 Informative message, check
-

It is advisable to attempt to resolve as many as possible of the alerts in all categories. Often the minor alerts point to easily fixed oversights, errors and omissions in your CIF or refinement strategy, so attention to these fine details can be worthwhile. In order to resolve some of the more serious problems it may be necessary to carry out additional measurements or structure refinements. However, the purpose of your study may justify the reported deviations and the more serious of these should normally be commented upon in the discussion or experimental section of a paper or in the "special\_details" fields of the CIF. checkCIF was carefully designed to identify outliers and unusual parameters, but every test has its limitations and alerts that are not important in a particular case may appear. Conversely, the absence of alerts does not guarantee there are no aspects of the results needing attention. It is up to the individual to critically assess their own results and, if necessary, seek expert advice.

### **Publication of your CIF in IUCr journals**

A basic structural check has been run on your CIF. These basic checks will be run on all CIFs submitted for publication in IUCr journals (*Acta Crystallographica*, *Journal of Applied Crystallography*, *Journal of Synchrotron Radiation*); however, if you intend to submit to *Acta Crystallographica Section C* or *E* or *IUCrData*, you should make sure that full publication checks are run on the final version of your CIF prior to submission.

### **Publication of your CIF in other journals**

Please refer to the *Notes for Authors* of the relevant journal for any special instructions relating to CIF submission.



# checkCIF/PLATON report

Structure factors have been supplied for datablock(s) UAD\_-130\_uracdih\_143k

THIS REPORT IS FOR GUIDANCE ONLY. IF USED AS PART OF A REVIEW PROCEDURE FOR PUBLICATION, IT SHOULD NOT REPLACE THE EXPERTISE OF AN EXPERIENCED CRYSTALLOGRAPHIC REFEREE.

No syntax errors found.      CIF dictionary      Interpreting this report

## Datablock: UAD\_-130\_uracdih\_143k

---

Bond precision:      = 0.0000 A      Wavelength=1.54184

Cell:      a=7.2830(3)      b=6.3616(3)      c=17.4781(9)  
            alpha=90      beta=90.020(4)      gamma=90

Temperature:      143 K

|                | Calculated             | Reported             |
|----------------|------------------------|----------------------|
| Volume         | 809.79(7)              | 809.79(7)            |
| Space group    | P 21/c                 | P 1 21/c 1           |
| Hall group     | -P 2ybc                | -P 2ybc              |
| Moiety formula | 0.5(C5 H4 N4 O3), H2 O | C5 H4 N4 O3, 2(H2 O) |
| Sum formula    | C2.50 H4 N2 O2.50      | C5 H8 N4 O5          |
| Mr             | 102.07                 | 204.15               |
| Dx,g cm-3      | 1.674                  | 1.675                |
| Z              | 8                      | 4                    |
| Mu (mm-1)      | 1.317                  | 1.317                |
| F000           | 424.0                  | 424.0                |
| F000'          | 425.69                 |                      |
| h,k,lmax       | 8,7,21                 | 8,7,21               |
| Nref           | 1536                   | 1524                 |
| Tmin,Tmax      | 0.912,0.971            | 0.609,1.000          |
| Tmin'          | 0.904                  |                      |

Correction method= # Reported T Limits: Tmin=0.609 Tmax=1.000  
AbsCorr = MULTI-SCAN

Data completeness= 0.992      Theta(max)= 69.984

R(reflections)= 0.0456( 1241)      wR2(reflections)= 0.1260( 1524)

S = 1.058      Npar= 165

---

The following ALERTS were generated. Each ALERT has the format  
**test-name\_ALERT\_alert-type\_alert-level.**  
Click on the hyperlinks for more details of the test.



### Alert level C

|                   |                                                         |       |        |
|-------------------|---------------------------------------------------------|-------|--------|
| PLAT088_ALERT_3_C | Poor Data / Parameter Ratio .....                       | 9.24  | Note   |
| PLAT417_ALERT_2_C | Short Inter D-H..H-D           Hw1B       ..H4B       . | 2.10  | Ang.   |
|                   | -x,1/2+y,-1/2-z =                                       | 2_554 | Check  |
| PLAT417_ALERT_2_C | Short Inter D-H..H-D           Hw2B       ..H4A       . | 2.14  | Ang.   |
|                   | x,y,z =                                                 | 1_555 | Check  |
| PLAT790_ALERT_4_C | Centre of Gravity not Within Unit Cell: Resd. #         | 1     | Note   |
|                   | C5 H4 N4 O3                                             |       |        |
| PLAT906_ALERT_3_C | Large K Value in the Analysis of Variance .....         | 2.008 | Check  |
| PLAT911_ALERT_3_C | Missing FCF Refl Between Thmin & STh/L=       0.600     | 5     | Report |



### Alert level G

|                   |                                                     |           |            |
|-------------------|-----------------------------------------------------|-----------|------------|
| PLAT002_ALERT_2_G | Number of Distance or Angle Restraints on AtSite    | 7         | Note       |
| PLAT007_ALERT_5_G | Number of Unrefined Donor-H Atoms .....             | 8         | Report     |
| PLAT042_ALERT_1_G | Calc. and Reported MoietyFormula Strings Differ     | Please    | Check      |
| PLAT045_ALERT_1_G | Calculated and Reported Z Differ by a Factor ...    | 2.00      | Check      |
| PLAT171_ALERT_4_G | The CIF-Embedded .res File Contains EADP Records    | 10        | Report     |
| PLAT172_ALERT_4_G | The CIF-Embedded .res File Contains DFIX Records    | 4         | Report     |
| PLAT230_ALERT_2_G | Hirshfeld Test Diff for   C3A       --C4A       .   | 5.7       | s.u.       |
| PLAT300_ALERT_4_G | Atom Site Occupancy of O1A           Constrained at | 0.5849    | Check      |
| PLAT300_ALERT_4_G | Atom Site Occupancy of O2A           Constrained at | 0.5849    | Check      |
| PLAT300_ALERT_4_G | Atom Site Occupancy of O3A           Constrained at | 0.5849    | Check      |
| PLAT300_ALERT_4_G | Atom Site Occupancy of N1A           Constrained at | 0.5849    | Check      |
| PLAT300_ALERT_4_G | Atom Site Occupancy of N2A           Constrained at | 0.5849    | Check      |
| PLAT300_ALERT_4_G | Atom Site Occupancy of N3A           Constrained at | 0.5849    | Check      |
| PLAT300_ALERT_4_G | Atom Site Occupancy of N4A           Constrained at | 0.5849    | Check      |
| PLAT300_ALERT_4_G | Atom Site Occupancy of C1A           Constrained at | 0.5849    | Check      |
| PLAT300_ALERT_4_G | Atom Site Occupancy of C2A           Constrained at | 0.5849    | Check      |
| PLAT300_ALERT_4_G | Atom Site Occupancy of C3A           Constrained at | 0.5849    | Check      |
| PLAT300_ALERT_4_G | Atom Site Occupancy of C4A           Constrained at | 0.5849    | Check      |
| PLAT300_ALERT_4_G | Atom Site Occupancy of C5A           Constrained at | 0.5849    | Check      |
| PLAT300_ALERT_4_G | Atom Site Occupancy of H1A           Constrained at | 0.5849    | Check      |
| PLAT300_ALERT_4_G | Atom Site Occupancy of H2A           Constrained at | 0.5849    | Check      |
| PLAT300_ALERT_4_G | Atom Site Occupancy of H3A           Constrained at | 0.5849    | Check      |
| PLAT300_ALERT_4_G | Atom Site Occupancy of H4A           Constrained at | 0.5849    | Check      |
| PLAT300_ALERT_4_G | Atom Site Occupancy of O1B           Constrained at | 0.415     | Check      |
| PLAT300_ALERT_4_G | Atom Site Occupancy of O2B           Constrained at | 0.415     | Check      |
| PLAT300_ALERT_4_G | Atom Site Occupancy of O3B           Constrained at | 0.415     | Check      |
| PLAT300_ALERT_4_G | Atom Site Occupancy of N1B           Constrained at | 0.415     | Check      |
| PLAT300_ALERT_4_G | Atom Site Occupancy of N2B           Constrained at | 0.415     | Check      |
| PLAT300_ALERT_4_G | Atom Site Occupancy of N3B           Constrained at | 0.415     | Check      |
| PLAT300_ALERT_4_G | Atom Site Occupancy of N4B           Constrained at | 0.415     | Check      |
| PLAT300_ALERT_4_G | Atom Site Occupancy of C1B           Constrained at | 0.415     | Check      |
| PLAT300_ALERT_4_G | Atom Site Occupancy of C2B           Constrained at | 0.415     | Check      |
| PLAT300_ALERT_4_G | Atom Site Occupancy of C3B           Constrained at | 0.415     | Check      |
| PLAT300_ALERT_4_G | Atom Site Occupancy of C4B           Constrained at | 0.415     | Check      |
| PLAT300_ALERT_4_G | Atom Site Occupancy of C5B           Constrained at | 0.415     | Check      |
| PLAT300_ALERT_4_G | Atom Site Occupancy of H1B           Constrained at | 0.415     | Check      |
| PLAT300_ALERT_4_G | Atom Site Occupancy of H2B           Constrained at | 0.415     | Check      |
| PLAT300_ALERT_4_G | Atom Site Occupancy of H3B           Constrained at | 0.415     | Check      |
| PLAT300_ALERT_4_G | Atom Site Occupancy of H4B           Constrained at | 0.415     | Check      |
| PLAT301_ALERT_3_G | Main Residue Disorder .....                         | (Resd 1 ) | 100% Note  |
| PLAT301_ALERT_3_G | Main Residue Disorder .....                         | (Resd 2 ) | 100% Note  |
| PLAT304_ALERT_4_G | Non-Integer Number of Atoms in .....                | Resd 1    | 9.36 Check |
| PLAT304_ALERT_4_G | Non-Integer Number of Atoms in .....                | Resd 2    | 6.64 Check |
| PLAT720_ALERT_4_G | Number of Unusual/Non-Standard Labels .....         | 6         | Note       |
| PLAT790_ALERT_4_G | Centre of Gravity not Within Unit Cell: Resd. #     | 2         | Note       |
|                   | C5 H4 N4 O3                                         |           |            |
| PLAT790_ALERT_4_G | Centre of Gravity not Within Unit Cell: Resd. #     | 3         | Note       |
|                   | H2 O                                                |           |            |

|                                                                           |             |
|---------------------------------------------------------------------------|-------------|
| PLAT790_ALERT_4_G Centre of Gravity not Within Unit Cell: Resd. #<br>H2 O | 4 Note      |
| PLAT811_ALERT_5_G No ADDSYM Analysis: Too Many Excluded Atoms ....        | ! Info      |
| PLAT860_ALERT_3_G Number of Least-Squares Restraints .....                | 5 Note      |
| PLAT870_ALERT_4_G ALERTS Related to Twinning Effects Suppressed ..        | ! Info      |
| PLAT883_ALERT_1_G No Info/Value for _atom_sites_solution_primary .        | Please Do ! |
| PLAT912_ALERT_4_G Missing # of FCF Reflections Above STh/L= 0.600         | 7 Note      |
| PLAT931_ALERT_5_G CIFcalcFCF Twin Law ( 0 0 1) Est.d BASF                 | 0.55 Check  |
| PLAT933_ALERT_2_G Number of OMIT Records in Embedded .res File ...        | 4 Note      |

---

|    |                                                                                   |
|----|-----------------------------------------------------------------------------------|
| 0  | <b>ALERT level A</b> = Most likely a serious problem - resolve or explain         |
| 0  | <b>ALERT level B</b> = A potentially serious problem, consider carefully          |
| 6  | <b>ALERT level C</b> = Check. Ensure it is not caused by an omission or oversight |
| 54 | <b>ALERT level G</b> = General information/check it is not something unexpected   |
|    |                                                                                   |
| 3  | ALERT type 1 CIF construction/syntax error, inconsistent or missing data          |
| 5  | ALERT type 2 Indicator that the structure model may be wrong or deficient         |
| 6  | ALERT type 3 Indicator that the structure quality may be low                      |
| 43 | ALERT type 4 Improvement, methodology, query or suggestion                        |
| 3  | ALERT type 5 Informative message, check                                           |

---

It is advisable to attempt to resolve as many as possible of the alerts in all categories. Often the minor alerts point to easily fixed oversights, errors and omissions in your CIF or refinement strategy, so attention to these fine details can be worthwhile. In order to resolve some of the more serious problems it may be necessary to carry out additional measurements or structure refinements. However, the purpose of your study may justify the reported deviations and the more serious of these should normally be commented upon in the discussion or experimental section of a paper or in the "special\_details" fields of the CIF. checkCIF was carefully designed to identify outliers and unusual parameters, but every test has its limitations and alerts that are not important in a particular case may appear. Conversely, the absence of alerts does not guarantee there are no aspects of the results needing attention. It is up to the individual to critically assess their own results and, if necessary, seek expert advice.

### Publication of your CIF in IUCr journals

A basic structural check has been run on your CIF. These basic checks will be run on all CIFs submitted for publication in IUCr journals (*Acta Crystallographica*, *Journal of Applied Crystallography*, *Journal of Synchrotron Radiation*); however, if you intend to submit to *Acta Crystallographica Section C* or *E* or *IUCrData*, you should make sure that full publication checks are run on the final version of your CIF prior to submission.

### Publication of your CIF in other journals

Please refer to the *Notes for Authors* of the relevant journal for any special instructions relating to CIF submission.

---

**PLATON version of 03/05/2019; check.def file version of 29/04/2019**



# checkCIF/PLATON report

Structure factors have been supplied for datablock(s) UAD\_-90\_uracdih\_183k

THIS REPORT IS FOR GUIDANCE ONLY. IF USED AS PART OF A REVIEW PROCEDURE FOR PUBLICATION, IT SHOULD NOT REPLACE THE EXPERTISE OF AN EXPERIENCED CRYSTALLOGRAPHIC REFEREE.

No syntax errors found.      CIF dictionary      Interpreting this report

## Datablock: UAD\_-90\_uracdih\_183k

---

|                 |                      |                      |              |
|-----------------|----------------------|----------------------|--------------|
| Bond precision: | = 0.0000 A           | Wavelength=1.54184   |              |
| Cell:           | a=7.3175(3)          | b=6.3565(3)          | c=17.4962(8) |
|                 | alpha=90             | beta=90.010(4)       | gamma=90     |
| Temperature:    | 183 K                |                      |              |
|                 | Calculated           | Reported             |              |
| Volume          | 813.81(6)            | 813.82(6)            |              |
| Space group     | P 21/c               | P 1 21/c 1           |              |
| Hall group      | -P 2ybc              | -P 2ybc              |              |
| Moiety formula  | C5 H4 N4 O3, 2(H2 O) | C5 H4 N4 O3, 2(H2 O) |              |
| Sum formula     | C5 H8 N4 O5          | C5 H8 N4 O5          |              |
| Mr              | 204.15               | 204.15               |              |
| Dx,g cm-3       | 1.666                | 1.666                |              |
| Z               | 4                    | 4                    |              |
| Mu (mm-1)       | 1.311                | 1.311                |              |
| F000            | 424.0                | 424.0                |              |
| F000'           | 425.73               |                      |              |
| h,k,lmax        | 8,7,21               | 8,7,21               |              |
| Nref            | 1541                 | 1529                 |              |
| Tmin,Tmax       | 0.913,0.972          | 0.508,1.000          |              |
| Tmin'           | 0.904                |                      |              |

Correction method= # Reported T Limits: Tmin=0.508 Tmax=1.000  
AbsCorr = MULTI-SCAN

Data completeness= 0.992      Theta(max)= 69.947

R(reflections)= 0.0470( 1225)      wR2(reflections)= 0.1326( 1529)

S = 1.032      Npar= 166

---

The following ALERTS were generated. Each ALERT has the format

**test-name\_ALERT\_alert-type\_alert-level.**

Click on the hyperlinks for more details of the test.



### Alert level C

---

|                   |                                                                |      |        |
|-------------------|----------------------------------------------------------------|------|--------|
| PLAT088_ALERT_3_C | Poor Data / Parameter Ratio .....                              | 9.21 | Note   |
| PLAT790_ALERT_4_C | Centre of Gravity not Within Unit Cell: Resd. #<br>C5 H4 N4 O3 | 1    | Note   |
| PLAT911_ALERT_3_C | Missing FCF Refl Between Thmin & STh/L= 0.600                  | 7    | Report |

---



### Alert level G

---

|                   |                                                                |        |        |
|-------------------|----------------------------------------------------------------|--------|--------|
| PLAT002_ALERT_2_G | Number of Distance or Angle Restraints on AtSite               | 7      | Note   |
| PLAT007_ALERT_5_G | Number of Unrefined Donor-H Atoms .....                        | 8      | Report |
| PLAT171_ALERT_4_G | The CIF-Embedded .res File Contains EADP Records               | 10     | Report |
| PLAT172_ALERT_4_G | The CIF-Embedded .res File Contains DFIX Records               | 2      | Report |
| PLAT230_ALERT_2_G | Hirshfeld Test Diff for N2A --C2A .                            | 7.5    | s.u.   |
| PLAT301_ALERT_3_G | Main Residue Disorder .....(Resd 1 )                           | 100%   | Note   |
| PLAT301_ALERT_3_G | Main Residue Disorder .....(Resd 2 )                           | 100%   | Note   |
| PLAT304_ALERT_4_G | Non-Integer Number of Atoms in ..... Resd 1                    | 9.36   | Check  |
| PLAT304_ALERT_4_G | Non-Integer Number of Atoms in ..... Resd 2                    | 6.64   | Check  |
| PLAT720_ALERT_4_G | Number of Unusual/Non-Standard Labels .....                    | 6      | Note   |
| PLAT790_ALERT_4_G | Centre of Gravity not Within Unit Cell: Resd. #<br>C5 H4 N4 O3 | 2      | Note   |
| PLAT790_ALERT_4_G | Centre of Gravity not Within Unit Cell: Resd. #<br>H2 O        | 3      | Note   |
| PLAT790_ALERT_4_G | Centre of Gravity not Within Unit Cell: Resd. #<br>H2 O        | 4      | Note   |
| PLAT811_ALERT_5_G | No ADDSYM Analysis: Too Many Excluded Atoms ....               | !      | Info   |
| PLAT860_ALERT_3_G | Number of Least-Squares Restraints .....                       | 5      | Note   |
| PLAT870_ALERT_4_G | ALERTS Related to Twinning Effects Suppressed ..               | !      | Info   |
| PLAT883_ALERT_1_G | No Info/Value for _atom_sites_solution_primary .               | Please | Do !   |
| PLAT912_ALERT_4_G | Missing # of FCF Reflections Above STh/L= 0.600                | 6      | Note   |
| PLAT931_ALERT_5_G | CIFcalcFCF Twin Law ( 0 0 1) Est.d BASF                        | 0.55   | Check  |
| PLAT933_ALERT_2_G | Number of OMIT Records in Embedded .res File ...               | 4      | Note   |

---

- 0 **ALERT level A** = Most likely a serious problem - resolve or explain  
0 **ALERT level B** = A potentially serious problem, consider carefully  
3 **ALERT level C** = Check. Ensure it is not caused by an omission or oversight  
20 **ALERT level G** = General information/check it is not something unexpected

- 1 ALERT type 1 CIF construction/syntax error, inconsistent or missing data  
3 ALERT type 2 Indicator that the structure model may be wrong or deficient  
5 ALERT type 3 Indicator that the structure quality may be low  
11 ALERT type 4 Improvement, methodology, query or suggestion  
3 ALERT type 5 Informative message, check
-

It is advisable to attempt to resolve as many as possible of the alerts in all categories. Often the minor alerts point to easily fixed oversights, errors and omissions in your CIF or refinement strategy, so attention to these fine details can be worthwhile. In order to resolve some of the more serious problems it may be necessary to carry out additional measurements or structure refinements. However, the purpose of your study may justify the reported deviations and the more serious of these should normally be commented upon in the discussion or experimental section of a paper or in the "special\_details" fields of the CIF. checkCIF was carefully designed to identify outliers and unusual parameters, but every test has its limitations and alerts that are not important in a particular case may appear. Conversely, the absence of alerts does not guarantee there are no aspects of the results needing attention. It is up to the individual to critically assess their own results and, if necessary, seek expert advice.

### **Publication of your CIF in IUCr journals**

A basic structural check has been run on your CIF. These basic checks will be run on all CIFs submitted for publication in IUCr journals (*Acta Crystallographica*, *Journal of Applied Crystallography*, *Journal of Synchrotron Radiation*); however, if you intend to submit to *Acta Crystallographica Section C* or *E* or *IUCrData*, you should make sure that full publication checks are run on the final version of your CIF prior to submission.

### **Publication of your CIF in other journals**

Please refer to the *Notes for Authors* of the relevant journal for any special instructions relating to CIF submission.



# checkCIF/PLATON report

Structure factors have been supplied for datablock(s) UAD\_-50\_uracdih\_223k

THIS REPORT IS FOR GUIDANCE ONLY. IF USED AS PART OF A REVIEW PROCEDURE FOR PUBLICATION, IT SHOULD NOT REPLACE THE EXPERTISE OF AN EXPERIENCED CRYSTALLOGRAPHIC REFEREE.

No syntax errors found.      CIF dictionary      Interpreting this report

## Datablock: UAD\_-50\_uracdih\_223k

---

Bond precision:      = 0.0000 A      Wavelength=1.54184

Cell:                      a=7.3553(4)      b=6.3485(3)      c=17.5125(9)  
                            alpha=90      beta=90.005(5)      gamma=90

Temperature:      223 K

|                | Calculated           | Reported             |
|----------------|----------------------|----------------------|
| Volume         | 817.75(7)            | 817.75(7)            |
| Space group    | P 21/c               | P 1 21/c 1           |
| Hall group     | -P 2ybc              | -P 2ybc              |
| Moiety formula | C5 H4 N4 O3, 2(H2 O) | C5 H4 N4 O3, 2(H2 O) |
| Sum formula    | C5 H8 N4 O5          | C5 H8 N4 O5          |
| Mr             | 204.15               | 204.15               |
| Dx,g cm-3      | 1.658                | 1.658                |
| Z              | 4                    | 4                    |
| Mu (mm-1)      | 1.304                | 1.304                |
| F000           | 424.0                | 424.0                |
| F000'          | 425.73               |                      |
| h,k,lmax       | 8,7,21               | 8,7,21               |
| Nref           | 1544                 | 1533                 |
| Tmin,Tmax      | 0.913,0.972          | 0.463,1.000          |
| Tmin'          | 0.904                |                      |

Correction method= # Reported T Limits: Tmin=0.463 Tmax=1.000  
AbsCorr = MULTI-SCAN

Data completeness= 0.993      Theta(max)= 69.786

R(reflections)= 0.0500( 1214)      wR2(reflections)= 0.1441( 1533)

S = 1.044      Npar= 166

---

The following ALERTS were generated. Each ALERT has the format  
**test-name\_ALERT\_alert-type\_alert-level.**  
Click on the hyperlinks for more details of the test.



### Alert level C

---

|                   |                                                                |      |        |
|-------------------|----------------------------------------------------------------|------|--------|
| PLAT088_ALERT_3_C | Poor Data / Parameter Ratio .....                              | 9.23 | Note   |
| PLAT790_ALERT_4_C | Centre of Gravity not Within Unit Cell: Resd. #<br>C5 H4 N4 O3 | 1    | Note   |
| PLAT911_ALERT_3_C | Missing FCF Refl Between Thmin & STh/L= 0.600                  | 7    | Report |

---



### Alert level G

---

|                   |                                                                |             |        |
|-------------------|----------------------------------------------------------------|-------------|--------|
| PLAT002_ALERT_2_G | Number of Distance or Angle Restraints on AtSite               | 7           | Note   |
| PLAT007_ALERT_5_G | Number of Unrefined Donor-H Atoms .....                        | 8           | Report |
| PLAT171_ALERT_4_G | The CIF-Embedded .res File Contains EADP Records               | 10          | Report |
| PLAT172_ALERT_4_G | The CIF-Embedded .res File Contains DFIX Records               | 3           | Report |
| PLAT301_ALERT_3_G | Main Residue Disorder .....(Resd 1 )                           | 100%        | Note   |
| PLAT301_ALERT_3_G | Main Residue Disorder .....(Resd 2 )                           | 100%        | Note   |
| PLAT304_ALERT_4_G | Non-Integer Number of Atoms in ..... Resd 1                    | 9.55        | Check  |
| PLAT304_ALERT_4_G | Non-Integer Number of Atoms in ..... Resd 2                    | 6.45        | Check  |
| PLAT720_ALERT_4_G | Number of Unusual/Non-Standard Labels .....                    | 6           | Note   |
| PLAT790_ALERT_4_G | Centre of Gravity not Within Unit Cell: Resd. #<br>C5 H4 N4 O3 | 2           | Note   |
| PLAT790_ALERT_4_G | Centre of Gravity not Within Unit Cell: Resd. #<br>H2 O        | 3           | Note   |
| PLAT790_ALERT_4_G | Centre of Gravity not Within Unit Cell: Resd. #<br>H2 O        | 4           | Note   |
| PLAT811_ALERT_5_G | No ADDSYM Analysis: Too Many Excluded Atoms ....               | !           | Info   |
| PLAT860_ALERT_3_G | Number of Least-Squares Restraints .....                       | 5           | Note   |
| PLAT870_ALERT_4_G | ALERTS Related to Twinning Effects Suppressed ..               | !           | Info   |
| PLAT883_ALERT_1_G | No Info/Value for _atom_sites_solution_primary .               | Please Do ! |        |
| PLAT912_ALERT_4_G | Missing # of FCF Reflections Above STh/L= 0.600                | 4           | Note   |
| PLAT931_ALERT_5_G | CIFcalcFCF Twin Law ( 0 0 1) Est.d BASF                        | 0.44        | Check  |
| PLAT933_ALERT_2_G | Number of OMIT Records in Embedded .res File ...               | 4           | Note   |

---

- 0 **ALERT level A** = Most likely a serious problem - resolve or explain  
0 **ALERT level B** = A potentially serious problem, consider carefully  
3 **ALERT level C** = Check. Ensure it is not caused by an omission or oversight  
19 **ALERT level G** = General information/check it is not something unexpected

- 1 **ALERT type 1** CIF construction/syntax error, inconsistent or missing data  
2 **ALERT type 2** Indicator that the structure model may be wrong or deficient  
5 **ALERT type 3** Indicator that the structure quality may be low  
11 **ALERT type 4** Improvement, methodology, query or suggestion  
3 **ALERT type 5** Informative message, check
-

It is advisable to attempt to resolve as many as possible of the alerts in all categories. Often the minor alerts point to easily fixed oversights, errors and omissions in your CIF or refinement strategy, so attention to these fine details can be worthwhile. In order to resolve some of the more serious problems it may be necessary to carry out additional measurements or structure refinements. However, the purpose of your study may justify the reported deviations and the more serious of these should normally be commented upon in the discussion or experimental section of a paper or in the "special\_details" fields of the CIF. checkCIF was carefully designed to identify outliers and unusual parameters, but every test has its limitations and alerts that are not important in a particular case may appear. Conversely, the absence of alerts does not guarantee there are no aspects of the results needing attention. It is up to the individual to critically assess their own results and, if necessary, seek expert advice.

### **Publication of your CIF in IUCr journals**

A basic structural check has been run on your CIF. These basic checks will be run on all CIFs submitted for publication in IUCr journals (*Acta Crystallographica*, *Journal of Applied Crystallography*, *Journal of Synchrotron Radiation*); however, if you intend to submit to *Acta Crystallographica Section C* or *E* or *IUCrData*, you should make sure that full publication checks are run on the final version of your CIF prior to submission.

### **Publication of your CIF in other journals**

Please refer to the *Notes for Authors* of the relevant journal for any special instructions relating to CIF submission.



# checkCIF/PLATON report

Structure factors have been supplied for datablock(s) UAD\_-10\_uracdih\_263k

THIS REPORT IS FOR GUIDANCE ONLY. IF USED AS PART OF A REVIEW PROCEDURE FOR PUBLICATION, IT SHOULD NOT REPLACE THE EXPERTISE OF AN EXPERIENCED CRYSTALLOGRAPHIC REFEREE.

No syntax errors found.      CIF dictionary      Interpreting this report

## Datablock: UAD\_-10\_uracdih\_263k

---

Bond precision:      = 0.0000 A      Wavelength=1.54184

Cell:      a=7.3872(4)      b=6.3397(3)      c=17.5312(9)  
            alpha=90      beta=90.004(5)      gamma=90

Temperature:      263 K

|                | Calculated           | Reported             |
|----------------|----------------------|----------------------|
| Volume         | 821.03(7)            | 821.03(7)            |
| Space group    | P 21/c               | P 1 21/c 1           |
| Hall group     | -P 2ybc              | -P 2ybc              |
| Moiety formula | C5 H4 N4 O3, 2(H2 O) | C5 H4 N4 O3, 2(H2 O) |
| Sum formula    | C5 H8 N4 O5          | C5 H8 N4 O5          |
| Mr             | 204.15               | 204.15               |
| Dx,g cm-3      | 1.652                | 1.652                |
| Z              | 4                    | 4                    |
| Mu (mm-1)      | 1.299                | 1.299                |
| F000           | 424.0                | 424.0                |
| F000'          | 425.73               |                      |
| h,k,lmax       | 9,7,21               | 9,7,21               |
| Nref           | 1549                 | 1538                 |
| Tmin,Tmax      | 0.914,0.972          | 0.423,1.000          |
| Tmin'          | 0.905                |                      |

Correction method= # Reported T Limits: Tmin=0.423 Tmax=1.000  
AbsCorr = MULTI-SCAN

Data completeness= 0.993      Theta(max)= 69.923

R(reflections)= 0.0476( 1167)      wR2(reflections)= 0.1366( 1538)

S = 1.051      Npar= 165

---

The following ALERTS were generated. Each ALERT has the format  
**test-name\_ALERT\_alert-type\_alert-level.**  
Click on the hyperlinks for more details of the test.

---

### ● Alert level C

|                   |                                                                |       |          |
|-------------------|----------------------------------------------------------------|-------|----------|
| PLAT088_ALERT_3_C | Poor Data / Parameter Ratio .....                              | 9.32  | Note     |
| PLAT260_ALERT_2_C | Large Average Ueq of Residue Including Ow2                     | 0.106 | Check    |
| PLAT417_ALERT_2_C | Short Inter D-H..H-D Hw1B ..H4B .                              | 2.12  | Ang.     |
|                   | -x,1/2+y,-1/2-z =                                              | 2_554 | Check    |
| PLAT790_ALERT_4_C | Centre of Gravity not Within Unit Cell: Resd. #<br>C5 H4 N4 O3 | 1     | Note     |
| PLAT911_ALERT_3_C | Missing FCF Refl Between Thmin & STh/L=                        | 0.600 | 7 Report |

---

### ● Alert level G

|                   |                                                                |        |        |
|-------------------|----------------------------------------------------------------|--------|--------|
| PLAT002_ALERT_2_G | Number of Distance or Angle Restraints on AtSite               | 7      | Note   |
| PLAT007_ALERT_5_G | Number of Unrefined Donor-H Atoms .....                        | 8      | Report |
| PLAT171_ALERT_4_G | The CIF-Embedded .res File Contains EADP Records               | 10     | Report |
| PLAT172_ALERT_4_G | The CIF-Embedded .res File Contains DFIX Records               | 3      | Report |
| PLAT300_ALERT_4_G | Atom Site Occupancy of O1A Constrained at                      | 0.5852 | Check  |
| PLAT300_ALERT_4_G | Atom Site Occupancy of O2A Constrained at                      | 0.5852 | Check  |
| PLAT300_ALERT_4_G | Atom Site Occupancy of O3A Constrained at                      | 0.5852 | Check  |
| PLAT300_ALERT_4_G | Atom Site Occupancy of N1A Constrained at                      | 0.5852 | Check  |
| PLAT300_ALERT_4_G | Atom Site Occupancy of N2A Constrained at                      | 0.5852 | Check  |
| PLAT300_ALERT_4_G | Atom Site Occupancy of N3A Constrained at                      | 0.5852 | Check  |
| PLAT300_ALERT_4_G | Atom Site Occupancy of N4A Constrained at                      | 0.5852 | Check  |
| PLAT300_ALERT_4_G | Atom Site Occupancy of C1A Constrained at                      | 0.5852 | Check  |
| PLAT300_ALERT_4_G | Atom Site Occupancy of C2A Constrained at                      | 0.5852 | Check  |
| PLAT300_ALERT_4_G | Atom Site Occupancy of C3A Constrained at                      | 0.5852 | Check  |
| PLAT300_ALERT_4_G | Atom Site Occupancy of C4A Constrained at                      | 0.5852 | Check  |
| PLAT300_ALERT_4_G | Atom Site Occupancy of C5A Constrained at                      | 0.5852 | Check  |
| PLAT300_ALERT_4_G | Atom Site Occupancy of H1A Constrained at                      | 0.5852 | Check  |
| PLAT300_ALERT_4_G | Atom Site Occupancy of H2A Constrained at                      | 0.5852 | Check  |
| PLAT300_ALERT_4_G | Atom Site Occupancy of H3A Constrained at                      | 0.5852 | Check  |
| PLAT300_ALERT_4_G | Atom Site Occupancy of H4A Constrained at                      | 0.5852 | Check  |
| PLAT300_ALERT_4_G | Atom Site Occupancy of O1B Constrained at                      | 0.4148 | Check  |
| PLAT300_ALERT_4_G | Atom Site Occupancy of O2B Constrained at                      | 0.4148 | Check  |
| PLAT300_ALERT_4_G | Atom Site Occupancy of O3B Constrained at                      | 0.4148 | Check  |
| PLAT300_ALERT_4_G | Atom Site Occupancy of N1B Constrained at                      | 0.4148 | Check  |
| PLAT300_ALERT_4_G | Atom Site Occupancy of N2B Constrained at                      | 0.4148 | Check  |
| PLAT300_ALERT_4_G | Atom Site Occupancy of N3B Constrained at                      | 0.4148 | Check  |
| PLAT300_ALERT_4_G | Atom Site Occupancy of N4B Constrained at                      | 0.4148 | Check  |
| PLAT300_ALERT_4_G | Atom Site Occupancy of C1B Constrained at                      | 0.4148 | Check  |
| PLAT300_ALERT_4_G | Atom Site Occupancy of C2B Constrained at                      | 0.4148 | Check  |
| PLAT300_ALERT_4_G | Atom Site Occupancy of C3B Constrained at                      | 0.4148 | Check  |
| PLAT300_ALERT_4_G | Atom Site Occupancy of C4B Constrained at                      | 0.4148 | Check  |
| PLAT300_ALERT_4_G | Atom Site Occupancy of C5B Constrained at                      | 0.4148 | Check  |
| PLAT300_ALERT_4_G | Atom Site Occupancy of H1B Constrained at                      | 0.4148 | Check  |
| PLAT300_ALERT_4_G | Atom Site Occupancy of H2B Constrained at                      | 0.4148 | Check  |
| PLAT300_ALERT_4_G | Atom Site Occupancy of H3B Constrained at                      | 0.4148 | Check  |
| PLAT300_ALERT_4_G | Atom Site Occupancy of H4B Constrained at                      | 0.4148 | Check  |
| PLAT301_ALERT_3_G | Main Residue Disorder .....(Resd 1 )                           | 100%   | Note   |
| PLAT301_ALERT_3_G | Main Residue Disorder .....(Resd 2 )                           | 100%   | Note   |
| PLAT304_ALERT_4_G | Non-Integer Number of Atoms in ..... Resd 1                    | 9.36   | Check  |
| PLAT304_ALERT_4_G | Non-Integer Number of Atoms in ..... Resd 2                    | 6.64   | Check  |
| PLAT720_ALERT_4_G | Number of Unusual/Non-Standard Labels .....                    | 6      | Note   |
| PLAT790_ALERT_4_G | Centre of Gravity not Within Unit Cell: Resd. #<br>C5 H4 N4 O3 | 2      | Note   |
| PLAT790_ALERT_4_G | Centre of Gravity not Within Unit Cell: Resd. #<br>H2 O        | 3      | Note   |
| PLAT790_ALERT_4_G | Centre of Gravity not Within Unit Cell: Resd. #<br>H2 O        | 4      | Note   |
| PLAT811_ALERT_5_G | No ADDSYM Analysis: Too Many Excluded Atoms ....               | !      | Info   |
| PLAT860_ALERT_3_G | Number of Least-Squares Restraints .....                       | 5      | Note   |
| PLAT870_ALERT_4_G | ALERTS Related to Twinning Effects Suppressed ..               | !      | Info   |

|                   |                                                  |             |
|-------------------|--------------------------------------------------|-------------|
| PLAT883_ALERT_1_G | No Info/Value for _atom_sites_solution_primary . | Please Do ! |
| PLAT912_ALERT_4_G | Missing # of FCF Reflections Above STh/L= 0.600  | 4 Note      |
| PLAT931_ALERT_5_G | CIFcalcFCF Twin Law ( 0 0 1) Est.d BASF          | 0.44 Check  |
| PLAT933_ALERT_2_G | Number of OMIT Records in Embedded .res File ... | 4 Note      |

---

0 **ALERT level A** = Most likely a serious problem - resolve or explain  
 0 **ALERT level B** = A potentially serious problem, consider carefully  
 5 **ALERT level C** = Check. Ensure it is not caused by an omission or oversight  
 51 **ALERT level G** = General information/check it is not something unexpected

1 ALERT type 1 CIF construction/syntax error, inconsistent or missing data  
 4 ALERT type 2 Indicator that the structure model may be wrong or deficient  
 5 ALERT type 3 Indicator that the structure quality may be low  
 43 ALERT type 4 Improvement, methodology, query or suggestion  
 3 ALERT type 5 Informative message, check

---

It is advisable to attempt to resolve as many as possible of the alerts in all categories. Often the minor alerts point to easily fixed oversights, errors and omissions in your CIF or refinement strategy, so attention to these fine details can be worthwhile. In order to resolve some of the more serious problems it may be necessary to carry out additional measurements or structure refinements. However, the purpose of your study may justify the reported deviations and the more serious of these should normally be commented upon in the discussion or experimental section of a paper or in the "special\_details" fields of the CIF. checkCIF was carefully designed to identify outliers and unusual parameters, but every test has its limitations and alerts that are not important in a particular case may appear. Conversely, the absence of alerts does not guarantee there are no aspects of the results needing attention. It is up to the individual to critically assess their own results and, if necessary, seek expert advice.

### Publication of your CIF in IUCr journals

A basic structural check has been run on your CIF. These basic checks will be run on all CIFs submitted for publication in IUCr journals (*Acta Crystallographica*, *Journal of Applied Crystallography*, *Journal of Synchrotron Radiation*); however, if you intend to submit to *Acta Crystallographica Section C* or *E* or *IUCrData*, you should make sure that full publication checks are run on the final version of your CIF prior to submission.

### Publication of your CIF in other journals

Please refer to the *Notes for Authors* of the relevant journal for any special instructions relating to CIF submission.

---

**PLATON version of 03/05/2019; check.def file version of 29/04/2019**



# checkCIF/PLATON report

Structure factors have been supplied for datablock(s) UAD\_30\_uracdih\_303k

THIS REPORT IS FOR GUIDANCE ONLY. IF USED AS PART OF A REVIEW PROCEDURE FOR PUBLICATION, IT SHOULD NOT REPLACE THE EXPERTISE OF AN EXPERIENCED CRYSTALLOGRAPHIC REFEREE.

No syntax errors found.      CIF dictionary      Interpreting this report

## Datablock: UAD\_30\_uracdih\_303k

---

|                 |                      |                                |
|-----------------|----------------------|--------------------------------|
| Bond precision: | = 0.0000 A           | Wavelength=1.54184             |
| Cell:           | a=7.4283(8)          | b=6.3266(5)      c=17.5627(16) |
|                 | alpha=90             | beta=90.044(10)      gamma=90  |
| Temperature:    | 303 K                |                                |
|                 | Calculated           | Reported                       |
| Volume          | 825.37(13)           | 825.37(13)                     |
| Space group     | P 21/c               | P 1 21/c 1                     |
| Hall group      | -P 2ybc              | -P 2ybc                        |
| Moiety formula  | C5 H4 N4 O3, 2(H2 O) | C5 H4 N4 O3, 2(H2 O)           |
| Sum formula     | C5 H8 N4 O5          | C5 H8 N4 O5                    |
| Mr              | 204.15               | 204.15                         |
| Dx,g cm-3       | 1.643                | 1.643                          |
| Z               | 4                    | 4                              |
| Mu (mm-1)       | 1.292                | 1.292                          |
| F000            | 424.0                | 424.0                          |
| F000'           | 425.73               |                                |
| h,k,lmax        | 9,7,21               | 9,7,21                         |
| Nref            | 1559                 | 1415                           |
| Tmin,Tmax       | 0.914,0.972          | 0.318,1.000                    |
| Tmin'           | 0.905                |                                |

Correction method= # Reported T Limits: Tmin=0.318 Tmax=1.000  
AbsCorr = MULTI-SCAN

Data completeness= 0.908      Theta(max)= 69.959

R(reflections)= 0.0941( 510)      wR2(reflections)= 0.3462( 1415)

S = 0.969      Npar= 165

---

The following ALERTS were generated. Each ALERT has the format

**test-name\_ALERT\_alert-type\_alert-level.**

Click on the hyperlinks for more details of the test.

---

 **Alert level A**

PLAT029\_ALERT\_3\_A \_diffn\_measured\_fraction\_theta\_full value Low . 0.916 Why?

**Author Response: Due to the distruction of the crystal caused by dehydration.**

---

 **Alert level B**

PLAT026\_ALERT\_3\_B Ratio Observed / Unique Reflections (too) Low .. 36% Check

**Author Response: Due to the distruction of the crystal caused by dehydration.**

PLAT911\_ALERT\_3\_B Missing FCF Refl Between Thmin & STh/L= 0.600 125 Report

**Author Response: Due to the distruction of the crystal caused by dehydration.**

---

 **Alert level C**

PLAT084\_ALERT\_3\_C High wR2 Value (i.e. > 0.25) ..... 0.35 Report  
PLAT088\_ALERT\_3\_C Poor Data / Parameter Ratio ..... 8.58 Note  
PLAT234\_ALERT\_4\_C Large Hirshfeld Difference O1A --C1A . 0.22 Ang.  
PLAT234\_ALERT\_4\_C Large Hirshfeld Difference N1A --C4A . 0.23 Ang.  
PLAT234\_ALERT\_4\_C Large Hirshfeld Difference N4A --C5A . 0.18 Ang.  
PLAT250\_ALERT\_2\_C Large U3/U1 Ratio for Average U(i,j) Tensor .... 2.3 Note  
PLAT250\_ALERT\_2\_C Large U3/U1 Ratio for Average U(i,j) Tensor .... 2.3 Note  
PLAT260\_ALERT\_2\_C Large Average Ueq of Residue Including Ow1 0.138 Check  
PLAT260\_ALERT\_2\_C Large Average Ueq of Residue Including Ow2 0.138 Check  
PLAT309\_ALERT\_2\_C Single Bonded Oxygen (C-O > 1.3 Ang) ..... 01B Check  
PLAT417\_ALERT\_2\_C Short Inter D-H..H-D Hw2B ..H4A . 2.11 Ang.  
x,y,z = 1\_555 Check  
PLAT728\_ALERT\_1\_C D-H..A Calc 177.00, Rep 175(19) Dev... 2.00 Degree  
OW1 -HW1A -O3B 1.555 1.555 1.555 # 44 Check  
PLAT790\_ALERT\_4\_C Centre of Gravity not Within Unit Cell: Resd. # 1 Note  
C5 H4 N4 O3

---

 **Alert level G**

PLAT002\_ALERT\_2\_G Number of Distance or Angle Restraints on AtSite 8 Note  
PLAT007\_ALERT\_5\_G Number of Unrefined Donor-H Atoms ..... 8 Report  
PLAT072\_ALERT\_2\_G SHELXL First Parameter in WGHT Unusually Large 0.19 Report  
PLAT171\_ALERT\_4\_G The CIF-Embedded .res File Contains EADP Records 10 Report  
PLAT172\_ALERT\_4\_G The CIF-Embedded .res File Contains DFIX Records 4 Report  
PLAT301\_ALERT\_3\_G Main Residue Disorder .....(Resd 1 ) 100% Note  
PLAT301\_ALERT\_3\_G Main Residue Disorder .....(Resd 2 ) 100% Note  
PLAT304\_ALERT\_4\_G Non-Integer Number of Atoms in ..... Resd 1 8.96 Check  
PLAT304\_ALERT\_4\_G Non-Integer Number of Atoms in ..... Resd 2 7.04 Check  
PLAT309\_ALERT\_2\_G Single Bonded Oxygen (C-O > 1.3 Ang) ..... 03B Check  
PLAT720\_ALERT\_4\_G Number of Unusual/Non-Standard Labels ..... 6 Note  
PLAT773\_ALERT\_2\_G Check long C-C Bond in CIF: C2B --C5B 2.01 Ang.  
PLAT779\_ALERT\_4\_G Suspect or Irrelevant (Bond) Angle in CIF .... # 28 Check  
N4B -C2B -C5B 1.555 1.555 1.555 43.00 Deg.

|                                                                    |        |       |
|--------------------------------------------------------------------|--------|-------|
| PLAT779_ALERT_4_G Suspect or Irrelevant (Bond) Angle in CIF .... # | 38     | Check |
| N4B -C5B -C2B 1.555 1.555 1.555                                    | 44.00  | Deg.  |
| PLAT790_ALERT_4_G Centre of Gravity not Within Unit Cell: Resd. #  | 2      | Note  |
| C5 H4 N4 O3                                                        |        |       |
| PLAT790_ALERT_4_G Centre of Gravity not Within Unit Cell: Resd. #  | 3      | Note  |
| H2 O                                                               |        |       |
| PLAT790_ALERT_4_G Centre of Gravity not Within Unit Cell: Resd. #  | 4      | Note  |
| H2 O                                                               |        |       |
| PLAT811_ALERT_5_G No ADDSYM Analysis: Too Many Excluded Atoms .... | !      | Info  |
| PLAT860_ALERT_3_G Number of Least-Squares Restraints .....         | 6      | Note  |
| PLAT870_ALERT_4_G ALERTS Related to Twinning Effects Suppressed .. | !      | Info  |
| PLAT883_ALERT_1_G No Info/Value for _atom_sites_solution_primary . | Please | Do !  |
| PLAT912_ALERT_4_G Missing # of FCF Reflections Above STh/L= 0.600  | 19     | Note  |
| PLAT931_ALERT_5_G CIFcalcFCF Twin Law ( 0 0 1) Est.d BASF          | 0.57   | Check |
| PLAT933_ALERT_2_G Number of OMIT Records in Embedded .res File ... | 4      | Note  |

---

1 **ALERT level A** = Most likely a serious problem - resolve or explain  
2 **ALERT level B** = A potentially serious problem, consider carefully  
13 **ALERT level C** = Check. Ensure it is not caused by an omission or oversight  
24 **ALERT level G** = General information/check it is not something unexpected

2 ALERT type 1 CIF construction/syntax error, inconsistent or missing data  
11 ALERT type 2 Indicator that the structure model may be wrong or deficient  
8 ALERT type 3 Indicator that the structure quality may be low  
16 ALERT type 4 Improvement, methodology, query or suggestion  
3 ALERT type 5 Informative message, check

---

It is advisable to attempt to resolve as many as possible of the alerts in all categories. Often the minor alerts point to easily fixed oversights, errors and omissions in your CIF or refinement strategy, so attention to these fine details can be worthwhile. In order to resolve some of the more serious problems it may be necessary to carry out additional measurements or structure refinements. However, the purpose of your study may justify the reported deviations and the more serious of these should normally be commented upon in the discussion or experimental section of a paper or in the "special\_details" fields of the CIF. checkCIF was carefully designed to identify outliers and unusual parameters, but every test has its limitations and alerts that are not important in a particular case may appear. Conversely, the absence of alerts does not guarantee there are no aspects of the results needing attention. It is up to the individual to critically assess their own results and, if necessary, seek expert advice.

### Publication of your CIF in IUCr journals

A basic structural check has been run on your CIF. These basic checks will be run on all CIFs submitted for publication in IUCr journals (*Acta Crystallographica*, *Journal of Applied Crystallography*, *Journal of Synchrotron Radiation*); however, if you intend to submit to *Acta Crystallographica Section C* or *E* or *IUCrData*, you should make sure that full publication checks are run on the final version of your CIF prior to submission.

### Publication of your CIF in other journals

Please refer to the *Notes for Authors* of the relevant journal for any special instructions relating to CIF submission.

Datablock UAD\_30\_uracdiH\_303k - ellipsoid plot
