# Supplementary material
Source: MDPI journal article supplement (https://www.mdpi.com/2075-163X/9/6/373)
Supplement: s1 [file s1]

Archive with 15 entries (15 files):
- UA_+30_last.cif
- UA_+60_last.cif
- UA_0_last.cif
- UA_-30_last.cif
- UA_-60_last.cif
- UA_-100_last.cif
- UA_-143_last.cif
- UA_-143+60_checkcif.pdf
- UAD_+30_last.cif
- UAD_-10_last.cif
- UAD_-50_last.cif
- UAD_-90_last.cif
- UAD_-130_last.cif
- UAD_-173_last.cif
- UAD_-173+30_checkcif.pdf
