# Supplementary material
Source: MDPI journal article supplement (https://www.mdpi.com/2075-163X/9/6/373)
Supplement: s1 [file s1 › UA_+30_last.cif]

data_UA_+30_urac_303k
_audit_creation_date               2019-04-29
_audit_creation_method
;
Olex2 1.2
(compiled 2018.05.29 svn.r3508 for OlexSys, GUI svn.r5506)
;
_shelx_SHELXL_version_number       '2018/3'
_audit_contact_author_address      ?
_audit_contact_author_email        ?
_audit_contact_author_name         ''
_audit_contact_author_phone        ?
_publ_contact_author_id_orcid      ?
_publ_section_references
;
Dolomanov, O.V., Bourhis, L.J., Gildea, R.J, Howard, J.A.K. & Puschmann, H.
 (2009), J. Appl. Cryst. 42, 339-341.

Sheldrick, G.M. (2015). Acta Cryst. C71, 3-8.
;
_chemical_name_common              ?
_chemical_name_systematic          ?
_chemical_formula_moiety           'C5 H4 N4 O3'
_chemical_formula_sum              'C5 H4 N4 O3'
_chemical_formula_weight           168.12
_chemical_melting_point            ?
_chemical_oxdiff_formula           'C5 H4 N4 O3'
loop_
  _atom_type_symbol
  _atom_type_description
  _atom_type_scat_dispersion_real
  _atom_type_scat_dispersion_imag
  _atom_type_scat_source
 'C' 'C' 0.0181 0.0091 'International Tables Vol C Tables 4.2.6.8 and 6.1.1.4'
 'H' 'H' 0.0000 0.0000 'International Tables Vol C Tables 4.2.6.8 and 6.1.1.4'
 'N' 'N' 0.0311 0.0180 'International Tables Vol C Tables 4.2.6.8 and 6.1.1.4'
 'O' 'O' 0.0492 0.0322 'International Tables Vol C Tables 4.2.6.8 and 6.1.1.4'

_shelx_space_group_comment
;
The symmetry employed for this shelxl refinement is uniquely defined
by the following loop, which should always be used as a source of
symmetry information in preference to the above space-group names.
They are only intended as comments.
;
_space_group_crystal_system        'monoclinic'
_space_group_IT_number             14
_space_group_name_H-M_alt          'P 1 21/n 1'
_space_group_name_Hall             '-P 2yn'
loop_
  _space_group_symop_operation_xyz
 'x, y, z'
 '-x+1/2, y+1/2, -z+1/2'
 '-x, -y, -z'
 'x-1/2, -y-1/2, z-1/2'

_cell_length_a                     6.1963(3)
_cell_length_b                     7.4512(4)
_cell_length_c                     13.1114(7)
_cell_angle_alpha                  90
_cell_angle_beta                   90.282(5)
_cell_angle_gamma                  90
_cell_volume                       605.34(5)
_cell_formula_units_Z              4
_cell_measurement_reflns_used      1247
_cell_measurement_temperature      303(2)
_cell_measurement_theta_max        73.0540
_cell_measurement_theta_min        6.7320
_shelx_estimated_absorpt_T_max     ?
_shelx_estimated_absorpt_T_min     ?
_exptl_absorpt_coefficient_mu      1.359
_exptl_absorpt_correction_T_max    1.00000
_exptl_absorpt_correction_T_min    0.97370
_exptl_absorpt_correction_type     multi-scan
_exptl_absorpt_process_details
;
CrysAlisPro 1.171.39.44a (Rigaku Oxford Diffraction, 2018)
Empirical absorption correction using spherical harmonics,
 implemented in SCALE3 ABSPACK scaling algorithm.
;
_exptl_absorpt_special_details     ?
_exptl_crystal_colour              'translucent light-yellow'
_exptl_crystal_density_diffrn      1.845
_exptl_crystal_density_meas        ?
_exptl_crystal_density_method      ?
_exptl_crystal_description         'prism'
_exptl_crystal_F_000               344
_exptl_crystal_size_max            0.075
_exptl_crystal_size_mid            0.07
_exptl_crystal_size_min            0.027
_exptl_transmission_factor_max     ?
_exptl_transmission_factor_min     ?
_diffrn_reflns_av_R_equivalents    0.0188
_diffrn_reflns_av_unetI/netI       0.0261
_diffrn_reflns_Laue_measured_fraction_full  0.984
_diffrn_reflns_Laue_measured_fraction_max  0.983
_diffrn_reflns_limit_h_max         7
_diffrn_reflns_limit_h_min         -7
_diffrn_reflns_limit_k_max         9
_diffrn_reflns_limit_k_min         -6
_diffrn_reflns_limit_l_max         15
_diffrn_reflns_limit_l_min         -15
_diffrn_reflns_number              2618
_diffrn_reflns_point_group_measured_fraction_full  0.984
_diffrn_reflns_point_group_measured_fraction_max  0.983
_diffrn_reflns_theta_full          67.684
_diffrn_reflns_theta_max           69.957
_diffrn_reflns_theta_min           3.371
_diffrn_ambient_environment        air
_diffrn_ambient_temperature        303(2)
_diffrn_detector                   'CCD plate'
_diffrn_detector_area_resol_mean   ?
_diffrn_detector_type              HyPix3000
_diffrn_measured_fraction_theta_full  0.984
_diffrn_measured_fraction_theta_max  0.983
_diffrn_measurement_details
;
List of Runs (angles in degrees, time in seconds):

  # Type    Start    End  Width  t~exp~   \w     \q     \k     \f   Frames
--------------------------------------------------------------------------
  1  \w   -100.00 -73.00   0.50    1.00    --  -38.95 -55.00 -24.00   54
  2  \w    -54.00 -16.00   0.50    1.00    --  -38.95  55.00 119.00   76
  3  \w    -65.00 -30.00   0.50    1.00    --  -38.95 -55.00 -24.00   70
  4  \w     24.00  54.00   0.50    1.00    --   38.95  55.00 119.00   60
  5  \w     89.00 153.00   0.50    2.50    --  107.00  55.00 119.00  128
  6  \w     45.00 127.00   0.50    2.50    --  107.00 -55.00 -24.00  164
  7  \w    -62.00   4.00   0.50    1.00    --  -38.95  77.00-150.00  132
  8  \w    -52.00 -14.00   0.50    1.00    --  -38.95  43.00 150.00   76
  9  \w   -102.00 -42.00   0.50    1.00    --  -38.95 -65.00 -60.00  120
 10  \w    -10.00  21.00   0.50    1.00    --  -38.95  43.00 150.00   62
 11  \w     68.00 106.00   0.50    1.00    --   38.95  21.00  90.00   76
 12  \w    -18.00  11.00   0.50    1.00    --   38.95 -32.00 -30.00   58
 13  \w     29.00  63.00   0.50    1.00    --   38.95  21.00  90.00   68
 14  \w    -26.00   0.00   0.50    1.00    --   38.95 -55.00 -24.00   52
 15  \w     16.00  48.00   0.50    1.00    --   38.95 -32.00 -30.00   64
 16  \w    -21.00  21.00   0.50    1.00    --   38.95 -32.00 150.00   84
 17  \w     34.00  63.00   0.50    1.00    --   38.95  43.00 -90.00   58
 18  \w     89.00 155.00   0.50    2.50    --  107.00  45.00   0.00  132
 19  \w     78.00 129.00   0.50    2.50    --  107.00 -61.00-150.00  102
 20  \w     68.00 114.00   0.50    2.50    --  107.00-133.00-150.00   92
 21  \w     41.00 120.00   0.50    2.50    --  107.00 -30.00 -60.00  158
 22  \w     93.00 127.00   0.50    2.50    --  107.00  30.00-180.00   68
 23  \w     99.00 153.00   0.50    2.50    --  107.00  45.00  90.00  108
 24  \w     55.00 122.00   0.50    2.50    --  107.00 -37.00  90.00  134
 25  \w     97.00 122.00   0.50    2.50    --  107.00 -53.00-150.00   50
 26  \w     99.00 125.00   0.50    2.50    --  107.00-133.00 -60.00   52
 27  \w     59.00  84.00   0.50    2.50    --  107.00 -53.00-150.00   50
 28  \w    120.00 155.00   0.50    2.50    --  107.00  30.00  30.00   70
 29  \w     44.00  92.00   0.50    2.50    --  107.00-133.00 -60.00   96
 30  \w    107.00 142.00   0.50    2.50    --  107.00  15.00  90.00   70
 31  \w     72.00 115.00   0.50    2.50    --  107.00 -37.00 150.00   86
;
_diffrn_measurement_device         'four-circle diffractometer'
_diffrn_measurement_device_type   
 'SuperNova, Single source at offset/far, HyPix3000'
_diffrn_measurement_method         '\w scans'
_diffrn_orient_matrix_type        
 'CrysAlisPro convention (1999,Acta A55,543-557)'
_diffrn_orient_matrix_UB_11        0.2130845000
_diffrn_orient_matrix_UB_12        -0.1008329000
_diffrn_orient_matrix_UB_13        -0.0188843000
_diffrn_orient_matrix_UB_21        -0.1002625000
_diffrn_orient_matrix_UB_22        -0.0903503000
_diffrn_orient_matrix_UB_23        -0.0946857000
_diffrn_orient_matrix_UB_31        0.0798085000
_diffrn_orient_matrix_UB_32        0.1562817000
_diffrn_orient_matrix_UB_33        -0.0669286000
_diffrn_radiation_monochromator    mirror
_diffrn_radiation_probe            x-ray
_diffrn_radiation_type             CuK\a
_diffrn_radiation_wavelength       1.54184
_diffrn_source                     'micro-focus sealed X-ray tube'
_diffrn_source_type                'SuperNova (Cu) X-ray Source'
_reflns_Friedel_coverage           0.000
_reflns_Friedel_fraction_full      .
_reflns_Friedel_fraction_max       .
_reflns_number_gt                  1025
_reflns_number_total               1125
_reflns_odcompleteness_completeness  98.00
_reflns_odcompleteness_iscentric   1
_reflns_odcompleteness_theta       72.42
_reflns_special_details
;
 Reflections were merged by SHELXL according to the crystal
 class for the calculation of statistics and refinement.
 
 _reflns_Friedel_fraction is defined as the number of unique
 Friedel pairs measured divided by the number that would be
 possible theoretically, ignoring centric projections and
 systematic absences. Completness statistics refer to single and
 composite reflections containing twin component 1 only.
;
_reflns_threshold_expression       'I > 2\s(I)'
_computing_cell_refinement         'CrysAlisPro 1.171.39.44a (Rigaku OD, 2018)'
_computing_data_collection         'CrysAlisPro 1.171.39.44a (Rigaku OD, 2018)'
_computing_data_reduction          'CrysAlisPro 1.171.39.44a (Rigaku OD, 2018)'
_computing_molecular_graphics      'Olex2 (Dolomanov et al., 2009)'
_computing_publication_material    'Olex2 (Dolomanov et al., 2009)'
_computing_structure_refinement    'ShelXL (Sheldrick, 2015)'
_computing_structure_solution      'ShelXT (Sheldrick, 2015)'
_refine_diff_density_max           0.214
_refine_diff_density_min           -0.183
_refine_diff_density_rms           0.044
_refine_ls_extinction_coef         0.0027(3)
_refine_ls_extinction_expression  
 'Fc^*^=kFc[1+0.001xFc^2^\l^3^/sin(2\q)]^-1/4^'
_refine_ls_extinction_method       'SHELXL-2018/3 (Sheldrick 2018)'
_refine_ls_goodness_of_fit_ref     1.061
_refine_ls_hydrogen_treatment      constr
_refine_ls_matrix_type             full
_refine_ls_number_parameters       111
_refine_ls_number_reflns           1125
_refine_ls_number_restraints       0
_refine_ls_R_factor_all            0.0465
_refine_ls_R_factor_gt             0.0420
_refine_ls_restrained_S_all        1.061
_refine_ls_shift/su_max            0.000
_refine_ls_shift/su_mean           0.000
_refine_ls_structure_factor_coef   Fsqd
_refine_ls_weighting_details      
 'w=1/[\s^2^(Fo^2^)+(0.0594P)^2^+0.2292P] where P=(Fo^2^+2Fc^2^)/3'
_refine_ls_weighting_scheme        calc
_refine_ls_wR_factor_gt            0.1110
_refine_ls_wR_factor_ref           0.1153
_refine_special_details
;
 Refined as a 2-component twin.
;
_olex2_refinement_description
;
1. Twinned data refinement
 Scales: 0.8987(18)
 0.1013(18)
2. Fixed Uiso
 At 1.2 times of:
  All N(H) groups
3.a Aromatic/amide H refined with riding coordinates:
 N1(H1), N2(H2), N3(H3), N4(H4)
;
_atom_sites_solution_hydrogens     geom
_atom_sites_solution_primary       ?
_atom_sites_solution_secondary     ?
loop_
  _atom_site_label
  _atom_site_type_symbol
  _atom_site_fract_x
  _atom_site_fract_y
  _atom_site_fract_z
  _atom_site_U_iso_or_equiv
  _atom_site_adp_type
  _atom_site_occupancy
  _atom_site_site_symmetry_order
  _atom_site_calc_flag
  _atom_site_refinement_flags_posn
  _atom_site_refinement_flags_adp
  _atom_site_refinement_flags_occupancy
  _atom_site_disorder_assembly
  _atom_site_disorder_group
 O1 O 0.9237(3) 0.4833(3) 0.36810(14) 0.0493(5) Uani 1 1 d . . . . .
 O2 O 0.5822(3) 0.7699(3) 0.63007(12) 0.0447(5) Uani 1 1 d . . . . .
 O3 O -0.0293(3) 0.9663(3) 0.35940(12) 0.0427(5) Uani 1 1 d . . . . .
 N1 N 0.7528(3) 0.6348(3) 0.49475(14) 0.0380(5) Uani 1 1 d . . . . .
 H1 H 0.856384 0.605211 0.535269 0.046 Uiso 1 1 calc R . . . .
 N2 N 0.6137(3) 0.6325(3) 0.32946(14) 0.0384(5) Uani 1 1 d . . . . .
 H2 H 0.618346 0.602845 0.266112 0.046 Uiso 1 1 calc R . . . .
 N3 N 0.2364(3) 0.8770(3) 0.47456(15) 0.0361(5) Uani 1 1 d . . . . .
 H3 H 0.185652 0.920577 0.530251 0.043 Uiso 1 1 calc R . . . .
 N4 N 0.2740(3) 0.7985(3) 0.31374(14) 0.0354(5) Uani 1 1 d . . . . .
 H4 H 0.249390 0.785082 0.249581 0.043 Uiso 1 1 calc R . . . .
 C1 C 0.7730(4) 0.5781(3) 0.39579(19) 0.0389(6) Uani 1 1 d . . . . .
 C2 C 0.4484(4) 0.7339(3) 0.36558(17) 0.0327(5) Uani 1 1 d . . . . .
 C3 C 0.4270(4) 0.7828(3) 0.46486(18) 0.0348(5) Uani 1 1 d . . . . .
 C4 C 0.5863(4) 0.7342(3) 0.53836(18) 0.0348(5) Uani 1 1 d . . . . .
 C5 C 0.1433(4) 0.8890(3) 0.38138(17) 0.0356(5) Uani 1 1 d . . . . .

loop_
  _atom_site_aniso_label
  _atom_site_aniso_U_11
  _atom_site_aniso_U_22
  _atom_site_aniso_U_33
  _atom_site_aniso_U_23
  _atom_site_aniso_U_13
  _atom_site_aniso_U_12
 O1 0.0436(10) 0.0654(12) 0.0387(10) -0.0023(9) -0.0071(8) 0.0141(9)
 O2 0.0519(10) 0.0582(11) 0.0238(8) 0.0005(7) -0.0092(7) 0.0011(9)
 O3 0.0396(9) 0.0587(11) 0.0298(9) 0.0009(8) -0.0060(7) 0.0093(8)
 N1 0.0359(10) 0.0456(12) 0.0324(10) 0.0031(8) -0.0100(8) 0.0030(9)
 N2 0.0406(11) 0.0480(12) 0.0264(10) -0.0015(8) -0.0087(8) 0.0035(9)
 N3 0.0375(10) 0.0445(11) 0.0262(9) -0.0015(8) -0.0031(8) 0.0029(9)
 N4 0.0370(10) 0.0461(11) 0.0231(9) -0.0018(8) -0.0052(8) 0.0025(9)
 C1 0.0378(12) 0.0434(13) 0.0354(12) 0.0031(10) -0.0090(10) -0.0007(11)
 C2 0.0349(11) 0.0364(12) 0.0269(11) 0.0011(9) -0.0064(9) -0.0033(9)
 C3 0.0360(11) 0.0400(12) 0.0284(11) 0.0009(9) -0.0064(9) 0.0000(10)
 C4 0.0376(12) 0.0380(12) 0.0287(11) 0.0034(9) -0.0069(10) -0.0043(10)
 C5 0.0389(12) 0.0417(13) 0.0262(11) 0.0000(9) -0.0048(9) -0.0023(10)

_geom_special_details
;
 All esds (except the esd in the dihedral angle between two l.s. planes)
 are estimated using the full covariance matrix.  The cell esds are taken
 into account individually in the estimation of esds in distances, angles
 and torsion angles; correlations between esds in cell parameters are only
 used when they are defined by crystal symmetry.  An approximate (isotropic)
 treatment of cell esds is used for estimating esds involving l.s. planes.
;
loop_
  _geom_bond_atom_site_label_1
  _geom_bond_atom_site_label_2
  _geom_bond_distance
  _geom_bond_site_symmetry_2
  _geom_bond_publ_flag
 O1 C1 1.227(3) . ?
 O2 C4 1.232(3) . ?
 O3 C5 1.247(3) . ?
 N1 H1 0.8600 . ?
 N1 C1 1.371(3) . ?
 N1 C4 1.394(3) . ?
 N2 H2 0.8600 . ?
 N2 C1 1.374(3) . ?
 N2 C2 1.360(3) . ?
 N3 H3 0.8600 . ?
 N3 C3 1.381(3) . ?
 N3 C5 1.351(3) . ?
 N4 H4 0.8600 . ?
 N4 C2 1.362(3) . ?
 N4 C5 1.380(3) . ?
 C2 C3 1.359(3) . ?
 C3 C4 1.423(3) . ?

loop_
  _geom_angle_atom_site_label_1
  _geom_angle_atom_site_label_2
  _geom_angle_atom_site_label_3
  _geom_angle
  _geom_angle_site_symmetry_1
  _geom_angle_site_symmetry_3
  _geom_angle_publ_flag
 C1 N1 H1 115.7 . . ?
 C1 N1 C4 128.5(2) . . ?
 C4 N1 H1 115.7 . . ?
 C1 N2 H2 120.5 . . ?
 C2 N2 H2 120.5 . . ?
 C2 N2 C1 118.9(2) . . ?
 C3 N3 H3 125.9 . . ?
 C5 N3 H3 125.9 . . ?
 C5 N3 C3 108.17(19) . . ?
 C2 N4 H4 125.7 . . ?
 C2 N4 C5 108.58(19) . . ?
 C5 N4 H4 125.7 . . ?
 O1 C1 N1 122.0(2) . . ?
 O1 C1 N2 121.9(2) . . ?
 N1 C1 N2 116.1(2) . . ?
 N2 C2 N4 128.3(2) . . ?
 C3 C2 N2 124.0(2) . . ?
 C3 C2 N4 107.6(2) . . ?
 N3 C3 C4 131.2(2) . . ?
 C2 C3 N3 108.2(2) . . ?
 C2 C3 C4 120.7(2) . . ?
 O2 C4 N1 122.3(2) . . ?
 O2 C4 C3 126.0(2) . . ?
 N1 C4 C3 111.7(2) . . ?
 O3 C5 N3 126.9(2) . . ?
 O3 C5 N4 125.6(2) . . ?
 N3 C5 N4 107.4(2) . . ?

loop_
  _geom_hbond_atom_site_label_D
  _geom_hbond_atom_site_label_H
  _geom_hbond_atom_site_label_A
  _geom_hbond_distance_DH
  _geom_hbond_distance_HA
  _geom_hbond_distance_DA
  _geom_hbond_angle_DHA
  _geom_hbond_site_symmetry_A
  _geom_hbond_publ_flag
 N1 H1 O1 0.86 1.97 2.827(3) 174.3 3_766 yes
 N2 H2 O3 0.86 2.01 2.815(3) 155.5 2_545 yes
 N3 H3 O3 0.86 1.94 2.789(3) 169.8 3_576 yes
 N4 H4 O2 0.86 1.92 2.728(2) 156.4 4_575 yes


loop_
  _geom_torsion_atom_site_label_1
  _geom_torsion_atom_site_label_2
  _geom_torsion_atom_site_label_3
  _geom_torsion_atom_site_label_4
  _geom_torsion
  _geom_torsion_site_symmetry_1
  _geom_torsion_site_symmetry_2
  _geom_torsion_site_symmetry_3
  _geom_torsion_site_symmetry_4
  _geom_torsion_publ_flag
 N2 C2 C3 N3 -177.1(2) . . . . ?
 N2 C2 C3 C4 2.4(4) . . . . ?
 N3 C3 C4 O2 0.0(5) . . . . ?
 N3 C3 C4 N1 178.8(2) . . . . ?
 N4 C2 C3 N3 0.6(3) . . . . ?
 N4 C2 C3 C4 -179.9(2) . . . . ?
 C1 N1 C4 O2 176.5(2) . . . . ?
 C1 N1 C4 C3 -2.3(4) . . . . ?
 C1 N2 C2 N4 -178.7(2) . . . . ?
 C1 N2 C2 C3 -1.5(4) . . . . ?
 C2 N2 C1 O1 178.5(2) . . . . ?
 C2 N2 C1 N1 -1.1(3) . . . . ?
 C2 N4 C5 O3 179.3(2) . . . . ?
 C2 N4 C5 N3 -1.0(3) . . . . ?
 C2 C3 C4 O2 -179.3(2) . . . . ?
 C2 C3 C4 N1 -0.5(3) . . . . ?
 C3 N3 C5 O3 -179.0(2) . . . . ?
 C3 N3 C5 N4 1.3(3) . . . . ?
 C4 N1 C1 O1 -176.4(2) . . . . ?
 C4 N1 C1 N2 3.2(4) . . . . ?
 C5 N3 C3 C2 -1.2(3) . . . . ?
 C5 N3 C3 C4 179.4(3) . . . . ?
 C5 N4 C2 N2 177.8(2) . . . . ?
 C5 N4 C2 C3 0.2(3) . . . . ?

_shelx_res_file
;
TITL urac_303k_a.res in P2(1)/n
    urac_303k.res
    created by SHELXL-2018/3 at 22:52:23 on 29-Apr-2019
REM Old TITL UrAc_303K in P2(1)/n
REM SHELXT solution in P2(1)/n: R1 0.186, Rweak 0.068, Alpha 0.097
REM <I/s> 0.348 for 102 systematic absences, Orientation as input
REM Formula found by SHELXT: C9 O3
CELL 1.54184 6.1963 7.4512 13.1114 90 90.282 90
ZERR 4 0.0003 0.0004 0.0007 0 0.005 0
LATT 1
SYMM 0.5-X,0.5+Y,0.5-Z
SFAC C H N O
UNIT 20 16 16 12

L.S. 20
PLAN  20
BOND $H
Htab
conf
list 4
fmap 2
acta
TWIN 1 0 0 0 -1 0 0 0 -1 2
OMIT -4 140
OMIT 1 2 2
OMIT -1 2 4
OMIT -1 2 6
OMIT 1 0 5
REM <olex2.extras>
REM <HklSrc "%.\\UrAc_303K.hkl">
REM </olex2.extras>

WGHT    0.059400    0.229200
EXTI    0.002714
BASF   0.10126
FVAR       4.00120
O1    4    0.923671    0.483288    0.368099    11.00000    0.04360    0.06540 =
         0.03871   -0.00228   -0.00707    0.01410
O2    4    0.582228    0.769868    0.630069    11.00000    0.05194    0.05818 =
         0.02382    0.00055   -0.00916    0.00107
O3    4   -0.029251    0.966345    0.359398    11.00000    0.03963    0.05868 =
         0.02983    0.00092   -0.00599    0.00926
N1    3    0.752774    0.634800    0.494753    11.00000    0.03594    0.04562 =
         0.03240    0.00310   -0.01005    0.00304
AFIX  43
H1    2    0.856384    0.605211    0.535269    11.00000   -1.20000
AFIX   0
N2    3    0.613657    0.632470    0.329457    11.00000    0.04065    0.04800 =
         0.02641   -0.00152   -0.00865    0.00352
AFIX  43
H2    2    0.618346    0.602845    0.266112    11.00000   -1.20000
AFIX   0
N3    3    0.236379    0.877027    0.474557    11.00000    0.03754    0.04452 =
         0.02622   -0.00145   -0.00308    0.00293
AFIX  43
H3    2    0.185652    0.920577    0.530251    11.00000   -1.20000
AFIX   0
N4    3    0.273983    0.798473    0.313741    11.00000    0.03703    0.04608 =
         0.02312   -0.00175   -0.00518    0.00251
AFIX  43
H4    2    0.249390    0.785082    0.249581    11.00000   -1.20000
AFIX   0
C1    1    0.772977    0.578085    0.395794    11.00000    0.03775    0.04340 =
         0.03540    0.00307   -0.00901   -0.00073
C2    1    0.448415    0.733912    0.365584    11.00000    0.03492    0.03636 =
         0.02688    0.00107   -0.00642   -0.00328
C3    1    0.427037    0.782791    0.464856    11.00000    0.03599    0.03998 =
         0.02838    0.00088   -0.00638    0.00002
C4    1    0.586327    0.734153    0.538360    11.00000    0.03757    0.03800 =
         0.02868    0.00337   -0.00687   -0.00426
C5    1    0.143288    0.888979    0.381383    11.00000    0.03886    0.04171 =
         0.02620    0.00002   -0.00482   -0.00230
HKLF 4


REM  urac_303k_a.res in P2(1)/n
REM wR2 = 0.1153, GooF = S = 1.061, Restrained GooF = 1.061 for all data
REM R1 = 0.0420 for 1025 Fo > 4sig(Fo) and 0.0465 for all 1125 data
REM 111 parameters refined using 0 restraints

END

WGHT      0.0594      0.2292

REM Instructions for potential hydrogen bonds
EQIV $1 -x+2, -y+1, -z+1
HTAB N1 O1_$1
EQIV $2 -x+1/2, y-1/2, -z+1/2
HTAB N2 O3_$2
EQIV $3 -x, -y+2, -z+1
HTAB N3 O3_$3
EQIV $4 x-1/2, -y+3/2, z-1/2
HTAB N4 O2_$4

REM Highest difference peak  0.214,  deepest hole -0.183,  1-sigma level  0.044
Q1    1   0.4420  0.8140  0.6279  11.00000  0.05    0.21
Q2    1   0.4384  0.7803  0.5354  11.00000  0.05    0.21
Q3    1   0.5737  0.7221  0.4634  11.00000  0.05    0.16
Q4    1   0.9242  0.4933  0.2829  11.00000  0.05    0.15
Q5    1   0.4213  0.7083  0.4208  11.00000  0.05    0.14
Q6    1   0.2478  0.7753  0.5073  11.00000  0.05    0.13
Q7    1   0.8972  0.4851  0.4571  11.00000  0.05    0.12
Q8    1   0.6018  0.5220  0.2628  11.00000  0.05    0.12
Q9    1   0.6973  0.3681  0.3597  11.00000  0.05    0.12
Q10   1   1.0644  0.3818  0.3444  11.00000  0.05    0.12
Q11   1   0.9270  0.5097  0.5428  11.00000  0.05    0.12
Q12   1   0.2909  0.8637  0.6144  11.00000  0.05    0.12
Q13   1   0.2038  0.5706  0.2564  11.00000  0.05    0.11
Q14   1   0.9753  0.6312  0.3361  11.00000  0.05    0.11
Q15   1   0.0886  0.9646  0.5558  11.00000  0.05    0.11
Q16   1   0.4634  0.8038  0.4058  11.00000  0.05    0.11
Q17   1   0.7598  0.7232  0.4952  11.00000  0.05    0.11
Q18   1   0.7571  0.6874  0.6017  11.00000  0.05    0.10
Q19   1   0.5900  0.7150  0.6375  11.00000  0.05    0.10
Q20   1   0.9501  0.6009  0.6002  11.00000  0.05    0.10
;
_shelx_res_checksum                66843
_shelx_hkl_file
;
   0   0   1 1.94528 5.12244  13
   0   0  -1 9.15748 5.92157  15
   0   0  -2 35903.6 380.541   8
   0   0  -2 36053.4 375.563  15
   0   0  -3 11.5473 17.6993   8
   0   0  -3 12.9145 16.1046  15
   0   0  -4 59471.7 664.903   8
   0   0   4 59805.7 642.737  11
   0   0   5-10.8520 17.6698  11
   0   0  -5 99.2639 28.8448   8
   0   0   6 65565.4 774.105  11
   0   0  -6 65081.8 797.710   8
   0   0   6 65456.9 789.522   4
   0   0  -7-13.4445 23.2185   2
   0   0  -7 12.8595 25.3960   8
   0   0   7 6.31981 27.7435   4
   0   0   8 33545.9 571.205   4
   0   0  -8 33406.0 574.292   8
   0   0  -8 32961.6 588.448   2
   0   0   9 18.3972 29.2258   4
   0   0  -9 9.79176 29.6625   2
   0   0  -9-9.37950 22.0091   8
   0   0 -10 1559.00 84.0314   6
   0   0 -10 1646.78 138.299   2
   0   0 -10 1440.03 127.097   8
   0   0  10 1374.86 123.709   4
   0   0 -11 9.42972 25.9463   6
   0   0 -12 7676.53 203.000   6
   0   0 -13-13.9276 28.8224   6
   0   0 -14 682.455 57.2031   6
   0   0 -15 9.27879 20.5277   6
   0   0 -16 517.780 35.6206   6
   0  -1   0 13.6208 5.12966   9
   0   1   0 5.02899 5.58515  13
   0   1   0 10.4750 10.0968  16
   0  -1  -1 363.993 21.7486   9
   0   1  -1 361.111 20.0392  16
   0   1   1 393.489 23.7983  13
   0  -1   1 331.284 18.1304   4
   0   1  -1 386.659 25.6256   7
   0  -1  -1 333.485 20.5312  15
   0   1  -1 363.121 18.9413  10
   0   1  -2 38090.6 398.373  10
   0  -1  -2 38306.4 411.479   9
   0   1   2 38035.5 418.566  13
   0   1  -2 38330.2 417.117   7
   0  -1  -2 38737.5 412.756  17
   0  -1  -2 38428.5 403.110   8
   0  -1   2 37504.1 358.686  11
   0  -1  -2 38002.5 408.828  15
   0  -1  -3 351.985 33.9266   8
   0  -1  -3 365.538 34.7499  15
   0   1  -3 438.919 37.6226   7
   0  -1  -3 324.991 32.2128  17
   0  -1  -4 6847.17 160.662   8
   0   1   4 7090.89 166.047  11
   0   1  -4 6864.60 158.222   8
   0  -1  -4 6989.00 163.358  15
   0  -1   5 58.1819 22.5271   4
   0   1   5 48.1711 24.3270   4
   0   1  -5 99.8357 29.2881   8
   0  -1  -5 50.9339 24.4022   8
   0   1   5 74.3400 27.1538  11
   0  -1   6 3900.45 147.206   4
   0   1   6 3939.25 151.033  11
   0  -1  -6 4477.46 156.938   8
   0   1   6 4189.94 150.390   4
   0  -1  -6 4246.14 153.420   2
   0   1  -6 4046.79 149.078   8
   0  -1   7 19.4027 24.7827   4
   0   1  -7 6.84346 26.2230   2
   0  -1  -7 6.71737 23.2016   2
   0   1   7-13.1445 25.9588  11
   0   1   7-6.29190 24.1095   4
   0   1  -7 6.45146 23.1243   8
   0  -1  -7 26.4284 25.3174   8
   0   1   8 2357.39 139.029  11
   0  -1  -8 2370.28 141.188   2
   0  -1   8 2307.58 136.936   4
   0   1  -8 2267.25 134.128   8
   0   1  -8 2328.03 140.451   2
   0  -1  -8 2337.91 138.868   8
   0   1   8 2134.55 129.878   4
   0  -1   9 355.399 64.7022   4
   0   1   9 337.774 60.6900   4
   0   1  -9 317.626 58.7882   8
   0  -1  -9 507.207 72.4624   2
   0  -1  -9 502.210 72.3443   8
   0   1  -9 515.199 74.2110   2
   0   1   9 463.025 71.3633  11
   0   1 -10 196.114 37.8409   6
   0   1  10 201.797 52.8934   4
   0  -1 -10 195.763 34.3913   6
   0  -1 -10 248.311 59.2447   8
   0  -1 -10 193.001 56.5357   2
   0  -1 -10 240.106 36.5992  21
   0   1 -10 265.017 59.4647   2
   0  -1  10 86.9736 41.6912   4
   0   1 -10 163.846 52.3451   8
   0   1 -11 1630.00 93.4329   6
   0  -1 -11 1826.23 95.6392   6
   0  -1 -11 1665.53 89.6312  21
   0  -1 -12 3113.81 123.595   6
   0   1 -12 3087.90 127.994   6
   0  -1 -12 3009.18 120.295  21
   0  -1 -13 389.569 44.7122  21
   0  -1 -13 332.657 44.4524   6
   0   1 -13 291.892 44.0017   6
   0   1 -14 373.894 44.4064   6
   0  -1 -14 343.056 42.6848   6
   0   1  15 41.5620 19.2917  23
   0  -1 -15 42.5372 21.9049   6
   0   1 -15 44.4302 22.5248   6
   0   1 -16 5.52891 14.2339   6
   0  -1 -16 1.69492 12.2584   6
   0   2   0 18359.4 261.261   7
   0   2   0 18733.0 260.544  16
   0   2  -1 266.151 30.4876   7
   0   2  -1 212.743 25.3739  16
   0  -2  -2 3311.54 91.7105   9
   0   2  -2 3228.63 84.4638  16
   0  -2  -2 3265.81 86.8809  15
   0   2  -2 3372.82 103.344   7
   0  -2  -2 3323.83 106.037  17
   0  -2  -3 2357.07 85.3742  15
   0   2  -3 2278.07 90.6415   7
   0  -2  -3 2418.69 94.4606  17
   0   2   4 11651.3 243.691  11
   0  -2  -4 11819.0 240.258  17
   0  -2  -4 11928.3 230.151  15
   0   2  -4 11284.0 237.374   7
   0  -2  -4 11130.6 226.427   8
   0  -2  -5 2550.45 111.478   8
   0   2   5 2533.43 118.539  11
   0   2  -5 2373.15 107.163   2
   0   2   6 2269.99 123.141  11
   0   2  -6 2458.18 122.413   2
   0  -2  -6 2373.56 119.643   8
   0   2  -7 1198.92 94.3203   2
   0  -2  -7 1076.38 89.3880   8
   0   2   7 1037.18 94.1397  11
   0   2   8 2624.95 157.034  11
   0   2   9 2604.99 167.846  11
   0  -2  -9 2552.86 104.632  21
   0  -2 -10 119.219 33.3164  21
   0   2  10 61.0731 43.7893  11
   0  -2 -11 2226.64 105.315  21
   0   2 -11 2092.65 101.992   6
   0   2 -12 833.252 66.8637   6
   0  -2 -12 954.081 70.1903  21
   0   2 -13 240.617 39.5853   6
   0  -2 -13 195.998 37.8968  21
   0  -2 -14 922.585 60.6653  21
   0   2 -14 1188.36 66.9544   6
   0   2  15 16.6483 18.2236  23
   0   2 -15 24.2293 19.6957   6
   0   3   0-7.78046 19.7199   7
   0   3  -1 1407.85 78.0090   7
   0   3  -2 20410.9 337.627   7
   0  -3  -2 19794.3 343.478  17
   0   3  -3 652.790 59.0822   7
   0   3   3 532.476 52.2839  11
   0  -3  -3 539.790 55.7363  17
   0  -3  -4 1778.96 102.744  17
   0   3   4 1628.77 96.7064  11
   0   3  -4 1579.50 93.9742   7
   0  -3  -5 1579.40 101.163  17
   0   3   5 1437.24 99.0756  11
   0   3  -5 1494.59 98.7932   7
   0   3   6 3457.53 164.551  11
   0   3   7 571.278 75.3841  11
   0   3   8 348.370 64.8210  11
   0  -3  -9 380.476 45.9046  21
   0   3   9 409.579 74.8600  11
   0  -3 -10 2778.55 115.765  21
   0  -3 -11 384.174 47.8196  21
   0  -3 -12 259.751 40.5422  21
   0   3  12 303.267 45.8762  30
   0  -3 -13 3093.67 114.848  21
   0   3  13 3159.50 113.917  30
   0   3  14 37.6516 20.7665  30
   0   3  14 48.4293 21.8737  23
   0  -3 -14 58.7170 22.7432  21
   0   3  15 23.9307 14.8845  23
   0   4   0 2611.16 125.336   7
   0   4  -1 366.959 49.1945   7
   0   4   1 411.347 53.0295   7
   0  -4  -1 299.359 47.7374  17
   0   4  -2 2199.89 118.160   7
   0  -4  -2 2281.88 122.977  17
   0  -4  -3 848.450 80.0737  17
   0   4  -3 873.807 79.0323   7
   0  -4  -4 13279.3 330.784  17
   0   4  -4 13102.0 324.865   7
   0  -4  -5 7552.81 255.958  17
   0   4  -5 8062.80 260.959   7
   0   4   7 2274.90 160.690  11
   0   4   7 2029.66 93.2256  28
   0   4   7 2007.65 94.6429  24
   0   4  -7 2139.09 92.0626  20
   0   4  -8 518.617 49.9285  20
   0   4   8 474.437 50.1600  28
   0   4   8 633.155 91.6564  11
   0   4   9 2497.27 110.020  28
   0   4  -9 2469.46 103.247  20
   0   4  10 5097.07 155.762  28
   0  -4 -10 4896.51 152.362  21
   0  -4 -11 418.191 48.2935  21
   0  -4 -12 4654.62 140.180  21
   0   4  12 4536.50 141.936  30
   0   4  13 1702.97 77.5799  23
   0  -4 -13 1864.01 79.6135  21
   0   4  13 1771.44 80.3582  30
   0   4  14 472.358 36.8002  30
   0  -5   0 15.8207 27.3223  17
   0   5   0-16.2319 28.0323   7
   0  -5  -1 279.922 54.6733  17
   0   5   1 227.692 48.0563   7
   0   5  -1 172.196 43.7745   7
   0  -5  -2 310.194 56.6562  17
   0   5  -2 262.166 51.3128   7
   0   5   2 449.081 63.2945   7
   0   5   3 1165.71 103.425   7
   0   5  -3 1015.69 96.4653   7
   0  -5  -3 847.648 91.2624  17
   0  -5  -4 99.1326 39.1602  17
   0   5   4 91.4275 26.8244  24
   0   5  -4 94.2376 39.3554   7
   0   5  -4 49.9582 22.1629  20
   0   5   4 74.2264 37.7149   7
   0   5  -5 1311.75 73.3539  20
   0   5  -5 1186.18 112.955   7
   0   5   5 1227.06 72.5718  28
   0   5   5 1293.17 74.9485  24
   0   5  -6 1121.06 71.2820  20
   0   5   6 1076.93 71.1941  24
   0   5   6 1067.54 70.6605  28
   0   5  -7 135.690 33.2721  20
   0   5   7 155.549 34.5308  28
   0   5  -8 782.855 62.1190  20
   0   5   8 684.493 61.0717  28
   0   5  -9 326.153 43.0541  20
   0   5   9 363.653 46.3403  28
   0   5 -10 34.5606 24.9528  20
   0   5  10 64.0861 29.2311  30
   0   5  11 1109.66 69.1757  30
   0   5  12 473.083 43.7797  30
   0   5  13 13.8283 16.8147  30
   0   6   0 2364.80 109.694  29
   0   6   1 1062.32 75.8317  29
   0   6  -1 1297.61 81.7941  29
   0  -6  -2 685.100 91.8516  17
   0   6   2 673.154 61.0668  29
   0   6  -5 75.0537 28.5308  20
   0   6   5 57.6212 26.1804  24
   0   6   6 433.962 49.6891  24
   0   6   6 426.177 48.9872  28
   0   6  -6 392.892 46.9567  20
   0   6  -7 2856.40 115.085  20
   0   6   7 2865.70 117.634  28
   0   6  -8 381.397 45.4251  20
   0   6   8 324.422 42.7962  31
   0   6  -9 143.820 31.0229  20
   0   6 -10 50.0896 22.2451  20
   0   6 -11 295.784 31.1786  20
   0   7   0 5.04076 22.6493  29
   0   7   1 310.330 46.8186  29
   0   7   2 148.127 34.6222  29
   0   7   3 264.864 42.0340  29
   0   7   4 105.484 31.1972  29
   0   7   5 1203.67 79.0530  29
   0   7   6 198.812 37.6207  31
   0   7   6 212.462 37.5859  29
   0   7  -6 218.397 35.7747  20
   0   7  -7 150.159 31.8995  20
   0   7   7 165.392 32.7873  29
   0   7   7 221.889 35.3740  31
   0   7  -8 12.1847 19.1353  20
   0   7   8-9.79800 17.6986  31
   0   7   8 11.1991 18.5819  29
   0   7   9 99.2993 24.7097  29
   0   7  -9 117.273 24.0708  20
   0   7 -10 177.801 23.1692  20
   0   7  10 165.281 23.6595  29
   0   8   1 80.0502 27.6574  29
   0   8   2 537.385 50.1375  29
   0   8   3 53.5564 24.8621  29
   0   8   3 90.9891 25.9750  31
   0   8   4 23.6602 20.2210  31
   0   8   4-3.61616 19.5962  29
   0   8   5 1039.64 62.0282  29
   0   8   5 1089.98 61.2979  31
   0   8   6 503.801 41.7447  29
   0   8   6 509.249 42.1149  31
   0   8   7 993.034 50.8776  31
   0   8   7 983.201 51.6187  29
   0   8  -8 398.403 27.1615  20
   0   8   8 372.758 28.4384  31
   0   8   8 338.338 28.7386  29
   1   0 -16-11.0272 13.6379   6
   1   0 -15 1563.51 71.9895   6
   1   0 -14-7.81173 22.1361   6
   1   0 -13 860.777 67.7734   6
   1   0 -12 24.2982 27.1459   6
   1   0 -11 2020.17 103.113   6
   1   0 -10 17.6197 23.8706   6
  -1   0  10-11.0618 31.7905   4
   1   0 -10 23.3911 37.1591   2
   1   0  -9 1025.96 104.793   2
  -1   0   9 1253.40 111.541   4
   1   0  -8-8.60036 23.3029   2
   1   0  -7 3843.28 157.592  15
   1   0  -7 3946.10 170.238   2
   1   0  -6 22.4951 26.3928   8
   1   0  -6 11.7008 23.7779   2
  -1   0   6 9.54993 18.2973  13
   1   0  -6 15.5990 26.3577  15
  -1   0   5 24437.4 367.472  13
   1   0  -5 24391.7 392.805   2
   1   0  -5 25063.8 378.714  15
   1   0  -5 24121.9 388.512   8
   1   0  -4-11.3410 21.1162   2
   1   0  -4 10.1453 22.2095  15
  -1   0   4-3.15230 17.6082  13
   1   0  -3 7643.84 166.821   2
  -1   0   3 8039.89 154.986  13
  -1   0   2-1.08166 9.83017  16
   1   0  -2 6.07512 18.4036  12
   1   0  -2 2.26092 16.2079   2
   1   0  -1 20857.7 254.943  14
  -1   0   0 0.37695 4.46655   7
  -1   0   0-1.53745 13.4986   3
  -1   0  -1 3450.87 82.1100   1
  -1   0  -1 3380.14 81.9919   9
  -1   0  -2-10.5717 14.7459   9
  -1   0  -3 2360.17 84.2979  10
  -1   0  -3 2495.10 86.1958   9
   1   0   4 3.47056 19.9479  11
  -1   0  -4-7.07683 18.8728   9
   1   0   4 7.18505 19.1614   4
  -1   0  -4-7.11043 21.5399  10
  -1   0  -5 4241.38 142.636  10
   1   0   5 4314.68 142.310   4
   1   0   5 4174.34 136.919  11
  -1   0  -6 5.69428 23.1431   8
   1   0   6-11.0835 24.3278   4
   1   0   6 5.20573 20.5614  11
   1   0   7 10722.4 284.104   4
  -1   0  -7 11081.8 287.025   8
  -1   0  -8 33.2708 28.7295   8
   1   0   8 8.11039 26.9145   4
   1   0   9 7082.07 266.368   4
  -1   0  -9 7787.14 281.768   8
  -1   0 -10-11.8036 40.7693   2
  -1   0 -10-11.2864 34.1903   8
  -1   0 -10-8.84840 23.5975   6
  -1   0 -11 2845.50 120.269   6
  -1   0 -12-9.67097 29.6606   6
  -1   0 -13 572.606 56.9684   6
  -1   0 -14 3.87156 25.9616   6
  -1   0 -15 291.333 34.6089   6
  -1   0 -16 1.79467 12.6337   6
   1   1 -16 28.5451 15.0053   6
   1   1 -15 78.4770 23.4167   6
   1  -1 -15 83.7466 24.0093   6
   1  -1 -14 3.67507 20.8281   6
   1   1 -14 11.3201 21.6885   6
   1   1 -13 2591.63 112.184   6
   1  -1 -13 2560.20 106.693  21
   1  -1 -13 2526.62 109.359   6
   1  -1 -12 1252.41 81.5709   6
   1  -1 -12 1251.63 79.1614  21
   1   1 -12 1464.38 88.3326   6
   1  -1 -11 271.236 43.7632   6
   1   1 -11 342.672 47.2526   6
  -1   1  10 2204.81 159.293   4
   1   1 -10 2427.76 171.249   2
  -1  -1  10 2439.80 168.636   4
   1   1 -10 2499.76 109.100   6
   1  -1 -10 2177.36 162.166   2
   1  -1 -10 2462.12 107.980   6
   1  -1 -10 2488.80 104.239  21
   1  -1  -9 303.272 60.5375   2
  -1   1   9 276.359 56.3398   4
   1   1  -9 347.725 65.0440   2
  -1  -1   9 367.596 64.2599   4
   1   1  -8 303.912 57.0918   2
   1  -1  -8 344.136 59.4946   2
  -1   1   8 321.865 56.1840  11
   1  -1  -7 8130.83 247.423   2
   1  -1  -7 8015.45 240.161  15
   1   1  -7 7427.32 237.949   2
   1   1  -7 7821.85 235.494   8
  -1   1   6 3207.07 136.917  13
   1   1  -6 3409.56 137.844   8
   1   1  -6 3601.02 146.777   2
   1  -1  -6 3421.77 143.803   2
   1  -1  -6 3233.49 137.595  15
   1   1  -5 765.931 61.2768   8
   1   1  -5 901.269 68.9483   2
  -1   1   5 868.014 67.1969  13
   1   1  -5 837.219 61.2025  15
   1  -1  -5 810.696 63.5672  15
   1  -1  -5 889.795 68.3447   2
   1  -1  -4 1190.05 71.2274  15
   1   1  -4 1142.83 70.1634   2
   1   1  -4 1119.05 61.3920  15
   1  -1  -4 1216.66 69.6332   2
  -1   1   4 1087.49 67.6555  13
   1   1  -4 1221.21 66.5403   8
   1   1  -3 1303.79 66.2434   2
   1  -1  -3 1280.46 55.5677  17
   1  -1  -3 1367.37 68.6091   2
   1   1  -3 1186.75 56.8052  15
  -1   1   3 1323.55 59.2161  16
  -1   1   3 1262.56 65.4228  13
   1  -1  -2 54089.3 575.441  12
   1   1  -2 54072.0 566.328   2
   1   1  -2 53391.6 540.390  12
  -1   1   2 53416.5 565.601  16
  -1  -1   1 765.541 37.9921   3
  -1   1   1 667.319 37.5394   3
   1   1  -1 765.490 38.6393  14
   1  -1  -1 738.857 40.9155  12
   1   1  -1 730.353 28.2949   7
  -1   1   1 719.464 41.0296  16
  -1   1   0 5410.22 103.156   3
  -1  -1   0 5361.25 98.6585   3
   1   1   0 5291.22 76.6776   7
  -1   1   0 5388.28 101.958   7
  -1   1  -1 156.480 21.2788   7
  -1   1  -1 138.621 21.6482   1
  -1  -1  -1 128.557 25.0412   9
  -1  -1  -1 172.909 21.7800   1
  -1   1  -1 139.595 14.7531   9
  -1   1  -2 28845.5 321.161   9
  -1  -1  -2 29042.6 335.537  10
  -1  -1  -2 28714.1 370.666   9
   1   1   2 29647.3 370.736  11
  -1   1  -2 28859.9 350.172   7
  -1   1  -3 6587.47 149.064   7
   1   1   3 6796.45 158.878  11
  -1   1  -3 6704.65 133.635   9
  -1   1  -3 6814.55 153.945  10
  -1  -1  -3 6820.13 159.842   9
  -1  -1  -3 6455.07 139.895  10
   1   1   4 734.476 54.8490   4
   1   1   4 791.989 59.9580  11
  -1  -1  -4 821.938 60.4185   9
  -1   1  -4 789.245 56.8248  10
   1  -1   4 826.684 58.0564   4
   1   1   5 1441.59 84.6739   4
   1   1   5 1595.36 90.8688  11
  -1  -1  -5 1599.91 87.3446   8
  -1  -1  -5 1503.57 89.4514   9
   1  -1   5 1535.38 87.3698   4
  -1   1  -5 1424.96 83.2996  10
   1  -1   6 839.855 72.1726   4
  -1  -1  -6 986.070 79.1370   8
   1   1   6 849.881 71.0660   4
   1   1   6 900.139 77.0021  11
   1  -1   7 1185.19 92.7389   4
   1   1   7 1617.08 105.829   4
  -1   1  -7 1327.77 98.6056   8
   1   1   7 1538.07 106.503  11
  -1  -1  -7 1315.13 96.9719   8
   1   1   8 161.164 43.7851  11
  -1  -1  -8 181.691 46.1568   8
  -1   1  -8 229.780 51.5842   8
   1   1   8 144.594 42.8730   4
   1  -1   8 207.638 47.7627   4
  -1   1  -9 1922.46 139.604   8
   1   1   9 2014.06 143.321  11
  -1  -1  -9 1967.77 139.412   8
  -1   1 -10 741.236 95.3855   8
  -1   1 -10 631.569 92.8938   2
  -1  -1 -10 561.502 54.7358  21
  -1   1 -10 696.701 61.6378   6
  -1  -1 -10 611.630 56.4681   6
  -1  -1 -10 607.662 86.4054   8
  -1  -1 -10 676.479 92.9650   2
  -1  -1 -11 560.502 55.8174  21
  -1  -1 -11 680.855 60.7468   6
  -1   1 -11 663.320 60.7098   6
  -1  -1 -12 2979.42 122.442   6
  -1  -1 -12 2938.31 118.963  21
  -1   1 -12 3309.63 128.906   6
  -1  -1 -13 479.216 50.8271   6
  -1   1 -13 518.258 54.3005   6
  -1   1 -14 22.5826 25.7514   6
   1   1  14 45.4325 23.7860  23
  -1  -1 -14 65.0692 26.1476   6
  -1   1 -15 30.7218 21.0692   6
   1   1  15 30.0962 17.3887  23
  -1  -1 -15 58.1438 21.1850   6
  -1   1 -16 91.6087 17.2025   6
   1  -2 -15 259.352 29.7886  21
   1  -2 -14 1595.69 77.1727  21
   1   2 -14 1462.95 72.5823   6
   1  -2 -13 1301.70 76.8701  21
   1   2 -13 1355.68 77.5406   6
   1  -2 -12 100.684 32.5209  21
   1   2 -12 67.3519 28.5404   6
   1   2 -11 7261.17 190.492   6
   1  -2 -11 7005.47 188.891  21
   1  -2 -10 2952.99 118.419  21
  -1   2  10 2901.31 188.955  11
   1   2  -9 1632.38 89.4238  26
   1  -2  -9 1746.42 87.1472  21
  -1   2   9 1499.21 132.118  11
  -1   2   8 1847.15 132.215  11
   1  -2  -7 21490.3 434.278  15
  -1   2   6 3736.63 158.011  13
   1  -2  -6 3367.52 149.202  15
  -1   2   5 11459.1 268.101  13
   1  -2  -5 11417.3 258.750  15
  -1   2   4 2282.78 107.123  13
   1  -2  -4 2328.74 102.409  15
  -1   2   3 11792.9 236.330  13
   1   2  -3 11697.7 212.237   7
  -1   2   3 11881.7 235.592  16
   1  -2  -3 11298.3 227.371  15
   1  -2  -2 59462.3 646.127  12
  -1   2   2 59341.3 671.300  16
   1   2  -2 59329.4 628.230   7
  -1   2   2 58812.1 662.930  13
  -1   2   1 203567. 1905.85  16
   1   2  -1 203928. 1844.81   7
   1  -2  -1 204703. 1857.47  12
  -1   2   0 116435. 1142.75  16
   1   2   0 114045. 1087.99   7
  -1  -2   0 115915. 1109.61  17
  -1   2   0 118361. 1134.41   7
  -1   2  -1 43858.5 514.383  16
  -1  -2  -1 44305.8 514.881   9
  -1  -2  -1 43078.1 510.194  17
  -1   2  -1 43255.7 513.036   7
  -1  -2  -2 8633.67 184.261   9
  -1   2  -2 8157.23 178.797   7
  -1  -2  -2 8222.07 180.102  17
   1   2   2 8475.25 180.474  11
   1   2   3 54439.2 651.662  11
  -1   2  -3 52767.2 622.709  10
  -1   2  -3 53782.0 641.157   7
  -1  -2  -3 53903.2 645.587   9
  -1   2  -4 16459.7 308.909   7
  -1  -2  -4 16426.4 317.052   9
   1   2   4 17512.6 324.101  11
  -1   2  -4 16989.5 297.426  10
   1   2   5 1716.84 104.648  11
  -1  -2  -5 1971.93 108.318   9
  -1   2  -5 2046.46 104.847  10
   1   2   6 25292.5 466.819  11
   1   2   7 18431.4 414.966  11
  -1   2  -7 19059.5 403.323   8
  -1   2  -8 193.875 45.4967   8
   1   2   8 240.800 59.1091  11
   1   2   9 865.800 99.8704  11
  -1   2  -9 1057.78 105.646   8
  -1  -2  -9 806.599 60.7187  21
   1   2  10 1614.17 143.745  11
  -1  -2 -10 1797.22 92.5760  21
   1   2  10 1640.50 91.2361  30
  -1   2 -10 1823.19 93.2620   6
  -1  -2 -11 16297.2 307.055  21
   1   2  11 16573.2 307.241  30
  -1   2 -11 16329.9 305.933   6
  -1   2 -12 632.570 59.1275   6
  -1  -2 -12 653.647 60.1615  21
   1   2  12 658.449 60.0701  30
  -1   2 -13 608.882 56.5816   6
   1   2  13 598.016 56.6244  23
   1   2  14 929.144 62.3659  23
  -1   2 -14 866.558 57.6635   6
   1   2  15 1445.96 64.2997  23
  -1   2 -15 1515.01 60.9924   6
  -1   3  15 75.9487 18.2757  23
   1  -3 -14 209.247 31.2340  21
  -1   3  13 417.470 44.8079  30
   1  -3 -13 473.760 47.7645  21
   1  -3 -12 1058.25 71.6533  21
   1  -3 -11 1841.62 94.9252  21
   1   3 -10 86.0322 31.7960  26
   1  -3 -10 59.7709 28.5507  21
   1   3  -9 169.057 36.1896  26
   1  -3  -9 267.177 38.9915  21
  -1   3   9 288.417 64.1254  11
  -1   3   8 1250.75 73.0230  28
   1  -3  -8 1382.62 74.8533  21
   1   3  -8 1081.29 74.8919  26
  -1   3   8 1375.79 122.633  11
  -1   3   7 120.820 41.7720  11
  -1   3   5 1990.26 120.589  13
   1  -3  -5 2198.18 119.116  17
  -1   3   4 467.777 54.3545  13
   1  -3  -4 485.816 54.9626  17
  -1   3   3 3274.83 130.000  13
  -1   3   2 6945.76 196.300  16
  -1   3   1 22.5071 19.2865   7
  -1   3   1 47.7548 27.0657  16
  -1  -3   0 511.799 48.1343  17
  -1   3   0 552.255 54.4388  16
  -1   3   0 513.120 51.7417   7
  -1   3  -1 106.062 28.9789   7
  -1  -3  -1 91.8902 28.8647  17
  -1   3  -1 88.5471 30.2992  16
  -1   3  -2 3508.23 134.093   7
  -1   3  -2 3582.26 129.749  16
  -1  -3  -2 3693.55 136.098  17
  -1   3  -3 1182.74 82.9519   7
  -1  -3  -3 1075.42 80.2029  17
   1   3   4 2886.15 133.944  11
  -1   3  -4 3000.31 135.899   7
  -1  -3  -5 742.268 71.8163   9
   1   3   5 585.229 67.7524  11
  -1   3  -5 565.634 64.9607   7
   1   3   6 2920.49 158.059  11
   1   3   7 876.232 94.2281  11
   1   3   8 1417.35 126.763  11
   1   3   8 1446.90 77.3295  28
  -1  -3  -8 1372.98 77.7105  21
  -1  -3  -9 57.1350 27.6106  21
   1   3   9 12.1390 38.5696  11
  -1  -3 -10 23.3188 26.0517  21
   1   3  10 23.8096 28.1211  30
  -1  -3 -11 3178.03 125.910  21
   1   3  11 3285.24 129.645  30
   1   3  12 1483.36 87.3255  23
   1   3  12 1595.64 86.4858  30
  -1  -3 -12 1668.66 88.8795  21
   1   3  13 81.5646 27.2918  30
   1   3  13 107.288 30.6996  23
   1   3  14 9.19320 18.0962  23
   1   3  14 2.78255 18.0788  30
   1   3  15 13.9506 12.6645  23
   1  -4 -14 4.28299 14.2130  21
  -1   4  14-6.43106 16.5564  30
   1  -4 -13 770.455 52.4759  21
  -1   4  13 786.642 55.1273  30
   1  -4 -12 22.5012 24.1003  21
  -1   4  11 1482.67 82.1182  28
   1  -4 -11 1869.12 92.5187  21
   1  -4 -10 362.655 46.7092  21
   1   4 -10 345.611 48.0854  26
  -1   4  10 403.522 46.9589  28
   1   4  -9 222.512 42.8259  26
  -1   4   9 246.710 39.9165  28
   1   4  -9 197.951 35.6043  20
  -1   4   8 3010.13 118.627  28
  -1   4   8 3146.09 199.038  11
   1   4  -8 2937.35 125.070  26
   1   4  -8 2811.20 110.798  20
  -1   4   8 2900.96 116.519  24
   1   4  -7 518.478 48.7441  20
  -1   4   7 359.775 44.5912  28
  -1   4   7 375.536 44.6960  24
   1   4  -7 512.901 52.8700  26
  -1   4   7 364.420 67.4254  11
   1  -4  -5 701.224 80.0354  17
   1  -4  -4 1284.94 100.248  17
   1  -4  -3 2784.54 144.202  17
  -1   4   2 2321.96 126.980   7
  -1   4   1 7332.80 224.070  16
  -1   4   1 7014.09 217.505   7
  -1   4   0 917.665 79.1155   7
  -1   4   0 935.565 78.9426  16
  -1  -4  -1 1142.07 84.9886  17
  -1   4  -1 1401.50 96.2253   7
  -1   4  -1 1405.59 94.2106  16
  -1  -4  -2 574.226 66.5947  17
  -1   4  -2 474.145 61.9090   7
  -1   4  -3 4350.34 182.620   7
  -1  -4  -3 4221.56 181.848  17
  -1   4  -4 2487.77 143.142   7
  -1   4  -5 175.523 46.0721   7
  -1   4  -6 4224.99 204.612   7
   1   4   7 627.196 54.6648  31
   1   4   7 642.747 55.2101  28
   1   4   8 554.561 53.3999  30
   1   4   8 693.405 93.8768  11
  -1   4  -9 1162.21 72.1813  20
   1   4   9 1051.70 73.8163  30
   1   4  10 216.500 42.3148  30
  -1  -4 -10 115.647 32.7546  21
  -1  -4 -11 423.127 48.3028  21
   1   4  11 556.000 54.8845  30
   1   4  12 83.7867 26.5710  23
   1   4  12 93.5788 30.8102  30
   1   4  13 1603.18 74.5949  30
   1   4  13 1529.61 71.4579  23
   1   4  14 15.1543 16.3304  30
   1   4  14 16.4866 14.7741  23
  -1   5  13 531.935 37.8222  30
  -1   5  12 399.251 39.5545  30
  -1   5  11 273.351 36.3744  28
   1   5 -10 432.069 44.5506  20
  -1   5  10 462.703 50.4853  28
   1   5 -10 530.005 53.8875  26
   1   5  -9 58.3116 27.6451  20
  -1   5   9 18.2201 24.6855  28
   1   5  -9 34.2318 28.1095  26
   1   5  -8 108.557 31.9623  20
  -1   5   8 79.3642 29.3381  28
   1   5  -8 111.309 33.2383  26
   1   5  -7 614.521 59.9316  26
   1   5  -7 553.252 54.4160  20
  -1   5   7 605.648 58.9607  18
  -1   5   7 678.856 60.6510  28
  -1   5   7 791.317 63.7935  24
  -1   5   6 480.831 52.2278  24
  -1   5   6 481.411 49.9577  28
   1   5  -6 471.362 48.9556  20
  -1   5   6 528.862 53.5858  18
   1  -5  -6 535.863 84.9875  17
   1   5  -5 655.121 59.4754  29
   1   5  -5 633.261 54.1446  20
  -1   5   5 594.220 54.9559  24
   1  -5  -5 614.908 86.9342  17
  -1   5   5 596.317 58.8628  18
  -1   5   5 639.947 54.7071  28
  -1   5   4 2919.88 111.669  24
   1   5  -4 2921.91 108.706  20
  -1   5   4 2930.81 116.678  18
  -1   5   4 2782.30 169.943   7
   1  -5  -4 2894.37 175.430  17
   1   5  -4 2968.82 120.574  29
   1  -5  -3-9.57727 29.0142  17
   1   5  -3 58.6111 25.1856  29
  -1   5   3 65.6101 35.9165   7
  -1   5   2 135.405 44.1089   7
   1  -5  -2 138.101 45.8431  17
  -1   5   1 478.834 69.1286   7
  -1   5   0 2671.24 155.619   7
  -1   5  -1 995.940 96.8486   7
  -1   5  -2 120.135 41.5352   7
  -1   5  -3 67.3394 33.2318   7
  -1   5  -4 782.483 92.0773   7
  -1   5  -5 2872.21 180.113   7
   1   5   6 64.6817 27.6451  31
  -1   5  -7 97.9886 28.8725  20
   1   5   7 112.863 32.1837  31
  -1   5  -8 141.069 34.2729  20
   1   5   8 74.0625 28.7504  31
  -1   5  -9 139.641 31.9872  20
   1   5   9 152.505 35.6847  30
  -1   5 -10 737.237 56.1828  20
   1   5  10 747.931 60.1621  30
   1   5  11 921.814 62.0978  30
   1   5  12 76.6373 23.8015  30
   1   5  13 333.048 30.0678  30
  -1   6  12 738.096 38.6036  30
  -1   6  11 998.930 52.6175  30
   1   6 -11 1017.98 51.2145  20
   1   6 -10 98.9769 25.4011  20
   1   6 -10 192.727 32.5718  26
   1   6  -9 695.506 57.4807  26
   1   6  -9 659.132 53.8007  20
  -1   6   9 681.273 56.2124  28
   1   6  -8 2474.56 103.128  20
   1   6  -8 2449.06 110.631  26
  -1   6   8 2318.99 103.676  28
  -1   6   7 1179.18 75.0074  28
   1   6  -7 1197.06 80.8262  26
  -1   6   7 1131.95 75.9196  24
   1   6  -7 1240.66 75.8631  20
   1   6  -6 4797.04 150.470  20
  -1   6   6 5196.66 157.558  28
  -1   6   6 5282.27 162.725  24
   1   6  -5 198.608 35.1109  20
  -1   6   5 276.068 41.3936  24
   1   6  -5 227.027 41.4450  29
   1   6  -4 121.304 31.1620  29
  -1   6   4 132.419 31.5335  18
  -1   6   4 112.884 31.2090  24
  -1   6   3 74.5495 27.8736  24
   1   6  -3 104.387 31.6294  29
  -1   6   3 61.5384 28.3270  18
   1   6  -2 547.494 56.7981  29
  -1   6   2 487.747 50.9327  24
   1   6  -1 2642.85 120.062  29
   1  -6  -1 2412.22 168.339  17
   1   6   0 2469.58 116.525  29
   1  -6   0 2518.05 169.261  17
   1   6   1 1439.98 89.0069  29
   1   6   2 2227.52 112.105  29
   1   6   3 618.762 62.0625  29
  -1   6  -5 49.8291 26.3903  20
   1   6   5 62.8222 28.9139  31
  -1   6  -6 1574.22 84.3271  20
   1   6   6 1602.13 90.4916  31
  -1   6  -7 565.237 53.1542  20
   1   6   7 482.901 52.0616  31
  -1   6  -8 1765.21 86.3962  20
   1   6   8 1677.22 88.8567  31
  -1   6  -9 782.016 55.8911  20
   1   6   9 705.720 54.3756  31
  -1   6 -10 217.959 31.5165  20
  -1   6 -11 1291.84 57.0311  20
   1   6  12 580.882 35.8796  29
   1   7  -9 48.2244 18.9113  20
   1   7  -8 644.193 48.2626  20
   1   7  -8 810.421 54.7086  26
   1   7  -7 13.1750 20.6911  20
   1   7  -7 26.5237 21.1658  26
   1   7  -6-7.07764 23.7305  20
  -1   7   6 39.1648 24.6026  24
   1   7  -6 12.6694 22.1588  26
  -1   7   5 123.472 30.3026  24
   1   7  -4 4.95473 22.7632  29
  -1   7   4-21.0643 23.8760  24
   1   7  -3 209.799 39.5625  29
  -1   7   3 219.977 37.6253  24
   1   7  -2 62.4687 28.2150  29
   1   7  -1 15.7784 22.5326  29
   1   7   0 132.158 33.9893  29
   1   7   1 31.7464 23.2289  29
   1   7   2 52.7638 30.3306  29
   1   7   3 20.8544 23.4265  29
   1   7   3 17.7956 23.7297  31
   1   7   4 71.3006 27.3382  31
   1   7   4 35.6413 25.8134  29
   1   7   5 522.837 55.7597  29
   1   7   5 526.125 52.5454  31
  -1   7  -6 126.193 28.7214  20
   1   7   6 172.461 34.3179  31
   1   7   6 187.648 35.9120  29
  -1   7  -7 94.9366 26.4378  20
   1   7   7 104.196 27.6255  31
   1   7   7 95.4042 27.8278  29
  -1   7  -8 296.215 34.3662  20
   1   7   8 233.833 34.0095  29
   1   7   8 235.919 33.1050  31
  -1   7  -9 79.4035 22.1143  20
   1   7   9 47.7252 18.3320  31
   1   7   9 52.7984 19.6756  29
  -1   7 -10 76.6434 17.1730  20
   1   7  10 82.0115 18.0362  29
  -1   8   7 111.062 20.0962  31
  -1   8   6 482.526 39.2168  31
   1   8  -6 491.825 38.8948  26
   1   8  -5 126.050 25.2506  26
   1   8  -3 271.860 37.3113  29
   1   8  -2 11.9624 18.7135  29
   1   8  -1 70.0061 24.6429  29
   1   8   0 462.777 48.2520  29
   1   8   1 120.435 29.7886  29
   1   8   2 56.8986 24.3186  29
   1   8   3 713.705 55.9929  29
   1   8   4 37.3041 20.6332  31
   1   8   4 14.6130 18.5197  29
   1   8   5 23.2489 19.6882  31
   1   8   5 59.7417 22.2586  29
   1   8   6 227.435 28.7014  31
   1   8   6 144.931 26.2415  29
   1   8   7 257.068 27.4562  31
   1   8   7 228.363 27.0409  29
   1   9   0-4.21522 11.5984  29
   1   9   1 2.09366 12.1998  29
   1   9   2 105.663 18.7338  29
   1   9   3 9.00281 10.7721  29
   2   0 -15-7.48664 15.8578   6
   2   0 -14 920.388 61.3048   6
   2   0 -13-12.8718 26.6375   6
   2   0 -12 5794.42 174.338   6
   2   0 -11 9.70762 26.7109   6
   2   0 -10 6299.64 179.982   6
   2   0  -9-9.81408 33.8976  15
   2   0  -9 17.0417 23.4454   6
   2   0  -8 8178.59 274.245  15
   2   0  -7 8.27279 25.0611   2
   2   0  -7-14.8591 25.6614  15
   2   0  -6 3207.53 145.485  15
  -2   0   5 10.3227 20.3862  13
   2   0  -5-10.8978 25.5719  15
   2   0  -4 31656.2 459.574  12
   2   0  -3-3.93375 19.5811  12
   2   0  -2 12147.4 235.415  14
   2   0  -2 11889.2 227.697  12
  -2   0   2 11541.6 232.090   3
  -2   0   1-6.75025 22.8624   3
   2   0  -1 6.76778 19.7181  14
  -2   0   0 51.8503 25.0324   3
  -2   0  -1 9.72613 19.6425   9
  -2   0  -1-3.40505 20.3706   1
  -2   0  -2 54886.3 631.568   9
  -2   0  -2 54512.3 637.285   1
  -2   0  -3-12.1373 22.5992   9
  -2   0  -4 75893.3 862.026  10
  -2   0  -4 73821.6 861.304   9
  -2   0  -5 28.1844 26.4544  10
  -2   0  -5 11.1583 22.6757   9
  -2   0  -6 2116.53 121.498  10
  -2   0  -6 1861.88 111.099   9
  -2   0  -8 1157.38 108.737   8
  -2   0  -9-30.0537 26.9705   6
  -2   0  -9 10.8904 32.9910   8
  -2   0 -10 41928.8 559.944   6
  -2   0 -11 4.84899 26.6843   6
  -2   0 -12 2095.39 102.136   6
  -2   0 -13 8.45712 25.6195   6
  -2   0 -14 5466.88 144.068   6
  -2   0 -15 2.42202 16.4063   6
   2   1 -15 203.062 26.7867   6
   2  -1 -15 180.478 26.0738   6
   2   1 -14 80.2844 26.0415   6
   2  -1 -14 68.7759 24.7116   6
   2  -1 -13 1096.52 67.5785  21
   2   1 -13 1180.14 74.0007   6
   2  -1 -13 1063.00 71.3380   6
   2   1 -12 2834.38 119.595   6
   2  -1 -12 2852.04 114.734  21
   2  -1 -12 2823.90 119.771   6
   2   1 -11 767.660 66.0387   6
   2  -1 -11 840.354 65.7566  21
   2  -1 -11 953.125 70.7392   6
   2  -1 -10 300.586 42.8270  21
   2   1 -10 268.424 41.8910   6
   2  -1 -10 265.697 41.6984   6
   2  -1  -9 295.985 40.4181  21
   2   1  -9 230.512 39.0642   6
   2  -1  -9 241.201 39.3567   6
   2  -1  -9 189.557 52.4607  15
  -2   1   8 514.607 71.4436  13
   2  -1  -8 483.208 72.9868  15
  -2   1   7 8100.95 258.344  13
   2  -1  -7 7679.06 253.292  15
  -2   1   6 1000.81 86.3281  13
   2  -1  -6 1104.59 91.9218  15
   2  -1  -5 486.071 59.0874  15
  -2   1   5 617.525 63.2542  13
   2  -1  -4 3466.10 135.772  12
  -2   1   4 3250.56 135.406  13
  -2   1   3 5886.23 164.661   3
   2  -1  -3 6072.57 168.012  12
   2   1  -3 5838.23 152.974  12
   2  -1  -2 6161.10 162.776  12
   2   1  -2 5662.37 144.614  12
  -2   1   2 5923.52 148.011  16
  -2  -1   2 6076.51 157.112   3
  -2   1   2 6093.86 158.291   3
   2   1  -2 5907.21 155.915  14
   2  -1  -2 6027.83 160.351  14
  -2  -1   1 1088.60 62.8369   3
  -2   1   1 919.525 60.6408   3
   2   1  -1 954.375 60.0339  14
   2  -1  -1 1006.36 63.1438  14
  -2  -1   0 12860.5 226.063   3
  -2   1  -1 1391.49 72.6909   1
  -2  -1  -1 1284.33 73.2174   9
  -2  -1  -1 1315.95 67.6747   1
  -2  -1  -2 4208.80 136.826   9
  -2   1  -2 4024.04 128.266   1
  -2  -1  -2 4262.09 127.799   1
  -2  -1  -3 3398.65 131.263   9
  -2  -1  -3 3448.58 118.071  10
  -2   1  -4 4922.77 167.225  10
  -2  -1  -4 4936.76 154.877  10
  -2  -1  -4 4854.81 167.869   9
  -2  -1  -5 2055.29 116.391   9
  -2  -1  -5 1911.71 103.984  10
  -2   1  -5 1919.33 111.398  10
  -2  -1  -6 3458.39 161.239   9
  -2   1  -6 3456.14 160.288  10
  -2   1  -7 2679.22 149.458  10
  -2  -1  -7 2397.77 138.914   8
  -2  -1  -8 794.090 89.5868   8
   2   1   9 2206.45 99.2046  30
  -2   1  -9 2016.28 151.653   8
  -2   1  -9 2202.26 101.475   6
  -2  -1  -9 1939.91 92.7657   6
   2   1  10 43.6358 26.2755  23
  -2  -1 -10 22.7381 25.0276   6
  -2   1 -10 42.3471 29.2130   6
   2   1  11 1727.97 96.5821  23
  -2  -1 -11 1744.87 93.0817   6
  -2   1 -11 1662.10 93.2735   6
  -2   1 -12 1583.86 89.7394   6
   2   1  12 1345.11 84.9072  23
  -2  -1 -12 1574.99 87.2480   6
   2   1  13 137.420 33.6338  23
  -2  -1 -13 127.138 31.8650   6
  -2   1 -13 153.326 35.3032   6
  -2  -1 -14 207.732 31.0730   6
  -2   1 -14 145.890 28.7953   6
   2   1  14 140.097 27.9496  23
   2   1  15 14.4924 14.5757   5
   2  -1  15 38.6350 17.1438   5
   2  -2 -15 285.325 26.5993  21
   2   2 -14 672.758 48.0523   6
   2  -2 -14 727.339 50.3265  21
   2  -2 -13 278.945 39.4767  21
   2   2 -13 332.833 40.4898   6
   2  -2 -12 274.947 42.8886  21
   2   2 -12 212.948 39.1861   6
   2  -2 -11 350.957 46.2804  21
   2  -2 -10 672.236 59.0490  21
   2  -2  -9 2657.68 110.688  21
   2   2  -9 2561.17 116.294  26
   2  -2  -9 2344.18 166.118  15
  -2   2   9 2478.47 171.725  11
   2  -2  -8 1568.86 80.7895  21
   2   2  -8 1591.69 85.5005  26
   2  -2  -8 1566.31 126.848  15
  -2   2   7 2084.56 139.225  13
   2  -2  -7 2194.53 142.929  15
  -2   2   6 939.888 88.8436  13
   2  -2  -6 758.014 79.3164  15
  -2   2   5 6075.67 208.258  13
   2  -2  -5 6080.72 204.873  15
  -2   2   4 3148.70 138.850  13
  -2   2   3 4648.69 160.211  13
   2  -2  -3 4648.86 156.007  12
  -2   2   3 4521.05 154.763  16
  -2   2   2 16638.8 310.217  16
   2  -2  -2 17139.8 306.421  12
  -2   2   2 16094.9 286.447   3
  -2   2   1 209.134 36.2085  16
   2  -2  -1 203.787 37.1992  12
  -2   2   1 188.119 31.9956   3
  -2   2   0 187.519 31.4158   7
  -2   2   0 150.981 31.8660  16
  -2  -2  -1 278.886 43.2700   9
  -2   2  -1 307.021 37.9574   7
  -2   2  -1 306.891 39.0278   1
  -2   2  -2 4265.60 136.833   1
  -2  -2  -2 4187.50 153.012   9
  -2   2  -2 4157.51 133.777   7
  -2  -2  -3 690.500 64.8440   9
  -2   2  -3 623.015 55.6581   7
  -2  -2  -4 737.519 71.1381   9
  -2   2  -4 830.477 70.4410  10
  -2   2  -4 704.358 64.0123   7
  -2  -2  -5 4365.31 181.319   9
  -2   2  -5 4208.25 169.887  10
  -2   2  -6 6779.76 230.619  10
  -2  -2  -6 7040.13 246.714   9
  -2   2  -7 2990.48 162.548  10
  -2  -2  -7 2851.20 166.983   9
  -2  -2  -8 467.113 49.2181  21
   2   2   8 565.746 52.3628  30
   2   2   9 3483.53 131.706  23
   2   2   9 3341.04 125.823  30
  -2   2  -9 3593.39 204.326   8
  -2   2  -9 3446.00 126.426   6
   2   2  10 1505.44 90.3214  23
   2   2  10 1454.07 86.4359  30
  -2   2 -10 1556.25 86.9194   6
   2   2  11 55.4011 27.7227  23
  -2   2 -11 83.1137 33.9816   6
   2   2  11 83.8771 30.9331  30
   2   2  12 1339.50 82.4222  23
   2   2  12 1324.40 78.5838  30
  -2   2 -12 1195.99 76.1417   6
   2   2  13 50.5516 25.1859  30
   2   2  13 52.6123 25.1294  23
  -2   2 -13 51.7052 25.0210   6
  -2   2 -14 93.1161 23.4197   6
   2   2  14 71.5483 23.4750  23
   2   2  15 128.713 21.0449  23
   2  -3 -14 503.773 39.7036  21
   2  -3 -13 317.072 38.5987  21
   2  -3 -12 337.850 42.6330  21
   2  -3 -11 62.8578 28.5352  21
   2  -3 -10 758.705 63.6714  21
   2   3 -10 688.634 64.9607  26
   2   3  -9 756.629 66.8268  26
   2  -3  -9 765.654 63.5058  21
  -2   3   9 739.589 60.7302  28
   2   3  -8 43.2183 28.3590  26
   2  -3  -8 50.2984 28.9566  21
   2  -3  -8 21.3559 27.0653  15
  -2   3   7 813.824 95.9167  13
   2   3  -7 701.154 59.2913  26
   2  -3  -7 767.320 57.3369  21
   2   3  -7 905.799 60.0960  20
   2  -3  -7 842.552 91.9678  15
  -2   3   6 438.376 66.7327  13
  -2   3   5 2119.03 131.756  13
  -2   3   4 5799.42 206.656  13
  -2   3   4 5728.99 202.315  16
  -2   3   3 4602.78 172.883  13
  -2   3   3 4625.63 175.212  16
  -2   3   2 737.634 71.1166  16
  -2   3   2 721.355 67.0935  13
  -2   3   2 705.140 63.9304   7
  -2   3   1 2773.69 131.692  16
  -2   3   1 3023.25 127.183   7
  -2   3   0 1603.02 98.1089  16
  -2  -3   0 1387.16 90.6793   9
  -2   3   0 1496.09 91.1384   7
  -2   3  -1 4744.02 169.609  16
  -2   3  -1 4910.12 163.636   7
  -2  -3  -2 361.151 50.8689   9
  -2   3  -2 407.312 51.6038  16
  -2   3  -2 294.462 46.4429   7
  -2   3  -3 3959.03 157.819  16
  -2  -3  -3 4123.25 169.858   9
  -2   3  -4 4019.37 166.805   7
  -2  -3  -4 4198.00 178.500   9
  -2  -3  -5 1203.34 102.631   9
  -2   3  -5 1395.36 104.188   7
  -2  -3  -6 367.334 63.2364   9
   2   3   7 301.589 39.5998  23
   2   3   7 289.554 40.4901  30
   2   3   7 299.570 39.6283  31
   2   3   8 123.279 33.0332  23
   2   3   8 79.8982 30.0793  30
   2   3   9 840.032 67.4454  23
   2   3   9 805.027 66.1859  30
   2   3  10 1740.69 95.6160  23
   2   3  10 1824.89 97.2047  30
   2   3  11 110.169 34.0475  23
   2   3  11 151.800 36.0864  30
   2   3  12 1005.19 70.3721  23
   2   3  12 1044.79 69.4272  30
   2   3  13 80.8738 27.1759  23
   2   3  13 169.629 31.0720  30
   2   3  14 112.196 22.6727  23
   2  -4 -14 141.832 19.8074  21
  -2   4  14 138.565 19.1629  30
   2  -4 -13 600.624 42.9702  21
   2  -4 -12 878.715 58.7489  21
   2  -4 -11 338.473 42.0833  21
  -2   4  11 344.166 41.8679  28
  -2   4  10 1417.19 80.9185  28
   2   4 -10 1404.99 89.0608  26
  -2   4   9 141.983 34.0155  28
   2   4  -9 214.594 38.5582  20
   2   4  -9 155.227 36.1134  26
   2   4  -8 14089.0 269.306  20
  -2   4   8 14184.3 280.942  28
   2   4  -8 13923.5 288.773  26
  -2   4   7 1820.99 148.884  11
   2   4  -7 1547.83 83.8075  20
  -2   4   7 1718.89 91.0999  18
   2   4  -7 1582.00 90.7937  26
   2   4  -6 1013.29 67.8510  20
  -2   4   6 900.119 68.2562  18
  -2   4   6 992.425 66.5722  24
   2   4  -5 2041.89 89.3801  20
  -2   4   5 2148.51 98.1418  18
   2   4  -5 2220.73 102.777  29
  -2   4   5 2122.49 92.9107  24
  -2   4   3 2912.55 152.175   7
  -2   4   3 2826.77 158.262  16
  -2   4   2 52728.0 753.040   7
  -2   4   2 50803.4 782.976  16
  -2   4   1 8316.18 263.447  16
  -2   4   1 8611.22 260.016   7
  -2   4   0 34803.2 587.180  16
  -2   4   0 34433.3 575.936   7
  -2   4  -1 5354.77 205.811  16
  -2   4  -1 5406.21 202.100   7
  -2   4  -2 9699.60 282.922   7
  -2   4  -2 10516.7 293.474  16
  -2   4  -3 563.315 71.4099   7
  -2   4  -4 123.451 43.9054   7
   2   4   5 7897.29 191.728  31
  -2   4  -5 7818.85 280.703   7
   2   4   6 7414.35 188.559  31
   2   4   7 264.104 41.4427  31
   2   4   8 2196.02 105.875  31
   2   4   8 2434.22 110.417  30
   2   4   9 130.508 36.2911  30
   2   4  10 3642.70 133.596  30
   2   4  11 198.672 35.6305  23
   2   4  11 161.231 34.3311  30
   2   4  12 1109.31 66.6807  30
   2   4  12 1012.86 61.2208  23
   2   4  13 244.248 30.5839  30
   2   4  13 227.444 28.3030  23
  -2   5  13 8.50852 12.6274  30
  -2   5  11 304.945 36.2152  28
   2   5 -10 300.016 38.0636  20
   2   5 -10 388.096 46.4588  26
  -2   5  10 353.205 42.4921  28
   2   5  -9 71.3658 28.4309  20
   2   5  -9 57.7322 30.5791  26
  -2   5   9 121.519 30.8410  28
   2   5  -8 1271.25 77.3331  20
  -2   5   8 1173.00 77.7726  18
  -2   5   8 1222.53 78.2546  28
   2   5  -8 1315.68 85.9108  26
  -2   5   8 1032.99 72.1707  24
  -2   5   7 68.7177 30.4768  18
   2   5  -7 26.2352 25.1372  20
  -2   5   7 94.9584 30.3261  24
  -2   5   7 69.3345 29.0404  28
   2   5  -7 46.7160 29.8388  26
   2   5  -6 225.095 38.9483  20
  -2   5   6 261.091 41.4557  18
  -2   5   6 275.229 41.9507  28
  -2   5   6 171.621 36.7624  24
   2   5  -5 25.1161 21.5947  20
   2   5  -5 5.19309 24.3713  29
  -2   5   5-8.84755 22.8213  24
  -2   5   5 9.64686 24.0096  18
  -2   5   5-4.30629 24.7515  28
  -2   5   4 144.129 33.9323  18
   2   5  -4 55.3804 26.4325  29
   2  -5  -4 63.3624 41.7215  17
  -2   5   4 73.8474 37.8250   7
  -2   5   4 128.654 32.6207  24
   2   5  -3 2031.95 101.645  29
  -2   5   3 1957.10 96.4884  18
  -2   5   3 1999.93 145.984   7
   2  -5  -3 2059.20 150.974  17
  -2   5   3 2053.92 96.4223  24
  -2   5   2 640.406 56.2296  18
   2   5  -2 759.720 62.4188  29
  -2   5   2 673.855 85.1089   7
  -2   5   2 691.250 55.6172  24
  -2   5   1-3.96408 20.4498  24
   2   5  -1 18.4883 21.2348  29
  -2   5   1 30.7399 31.0404  16
  -2   5   1-19.5999 28.1639   7
  -2   5   0 211.476 33.8132  24
  -2   5   0 185.336 48.5893   7
   2   5   0 215.303 37.7937  29
  -2   5   0 259.518 54.1205  16
  -2   5  -1 31.2330 20.1454  24
   2   5   1 73.3518 27.4301  29
  -2   5  -1 68.3370 34.9949  16
  -2   5  -1 69.0624 35.3663   7
  -2   5  -2 74.5038 25.2081  24
   2   5   2 78.7858 28.4358  29
  -2   5  -2 100.949 37.4600   7
   2   5   3 466.854 48.4618  31
  -2   5  -3 507.095 48.3395  24
  -2   5  -3 564.289 80.1951   7
   2   5   4 210.195 36.8970  31
  -2   5  -4 208.963 54.7739   7
   2   5   5 23.3321 23.2289  31
   2   5   6 421.892 51.0603  31
   2   5   7 389.183 48.8220  31
   2   5   8 575.886 57.0097  31
  -2   5  -9 117.101 29.9309  20
   2   5   9 119.163 31.8574  31
  -2   5 -10 401.501 42.2615  20
   2   5  10 409.226 43.9272  30
   2   5  11 2048.92 84.5993  30
   2   5  12 146.978 24.7548  30
  -2   6  11 337.417 30.2549  30
  -2   6  10 48.7939 19.4467  28
   2   6  -9 562.700 47.1755  20
  -2   6   9 516.340 46.2626  28
   2   6  -8 187.990 37.2497  26
   2   6  -8 155.086 31.2706  20
  -2   6   8 152.061 30.6038  28
   2   6  -7 52.1150 28.2227  20
  -2   6   7 74.9084 29.0252  28
  -2   6   7 25.5316 23.7718  24
   2   6  -7 23.8470 27.7937  26
   2   6  -6 620.956 55.6526  20
  -2   6   6 563.904 56.0710  18
  -2   6   6 515.012 50.4786  28
  -2   6   6 485.023 52.7151  24
   2   6  -5 264.045 39.6144  20
  -2   6   5 267.892 43.1002  18
  -2   6   5 312.991 43.0422  24
  -2   6   4 739.897 63.7252  24
  -2   6   4 719.933 65.2319  18
   2   6  -4 721.737 67.1597  29
  -2   6   3 341.429 46.1592  18
  -2   6   3 270.621 43.5958  24
   2   6  -2 378.797 50.7196  29
  -2   6   2 462.028 51.4655  24
   2   6  -1 788.952 67.6497  29
  -2   6   1 848.091 64.0877  24
   2   6   0 15.8086 22.0042  29
  -2   6   0 17.6213 21.9289  24
   2   6   1 889.528 72.3998  29
  -2   6  -1 869.810 65.2362  24
   2   6   2 110.558 35.3205  29
  -2   6  -2 145.865 32.1172  24
   2   6   3 2180.22 103.283  31
   2   6   3 2304.07 113.925  29
   2   6   4 239.255 40.0110  31
   2   6   4 319.058 46.2531  29
   2   6   5 213.026 38.5246  31
   2   6   5 226.397 41.5746  29
   2   6   6 144.293 35.9780  31
   2   6   6 198.771 37.8117  29
  -2   6  -7 70.8692 26.9391  20
   2   6   7 39.8080 27.4640  31
  -2   6  -8 436.015 44.3116  20
   2   6   8 413.373 46.4349  31
  -2   6  -9 1442.84 71.6582  20
   2   6   9 1468.99 73.6491  31
  -2   6 -10 177.184 27.4341  20
   2   6  10 179.193 26.4214  31
  -2   6 -11 80.0464 17.7856  20
   2   7  -9 134.030 23.2452  26
   2   7  -8 74.1896 23.7991  26
  -2   7   8 118.119 22.5995  28
   2   7  -7 70.5816 25.0792  26
   2   7  -6 12.7799 19.5980  20
   2   7  -6 3.98509 22.5852  26
  -2   7   6 14.4453 21.8801  24
  -2   7   5 382.546 44.8340  24
   2   7  -4 437.816 50.2851  29
  -2   7   4 442.672 47.9131  24
   2   7  -3 59.3286 26.3766  29
  -2   7   3 79.8211 27.0035  24
   2   7  -2 75.7981 29.8474  29
  -2   7   2 76.2820 27.8395  24
   2   7  -1 101.972 32.7701  29
  -2   7   1 50.4817 26.1238  24
   2   7   0 699.174 64.0192  29
  -2   7   0 702.938 57.9789  24
   2   7   1 45.6078 27.0314  29
   2   7   2 199.519 37.6620  29
   2   7   3 58.3012 27.1428  29
   2   7   4 145.039 32.3169  31
   2   7   4 162.922 35.1359  29
   2   7   5 723.857 56.4303  31
   2   7   5 719.804 59.8550  29
   2   7   6 69.5641 24.8037  31
  -2   7  -6 53.3564 23.6776  20
   2   7   6 23.8220 20.1295  29
   2   7   7 35.9368 22.3510  31
  -2   7  -7 34.3970 20.5496  20
   2   7   7 10.4094 18.2071  29
  -2   7  -8 113.737 23.5957  20
   2   7   8 148.479 25.4280  31
   2   7   8 151.605 25.1413  29
  -2   7  -9 100.360 19.6902  20
   2   7   9 48.3913 17.1127  31
   2   8  -7 205.893 22.7926  26
  -2   8   6 64.7431 17.6774  31
   2   8  -6 58.9036 18.8025  26
   2   8  -5 394.000 36.0689  26
  -2   8   4 331.176 34.7240  24
  -2   8   3 823.208 51.8500  24
   2   8  -2 646.569 52.0279  29
  -2   8   2 549.751 43.6826  24
   2   8  -1 126.628 29.6555  29
   2   8   0 67.6158 23.6040  29
   2   8   1 374.246 41.0586  29
   2   8   2 304.300 37.8123  29
   2   8   3 904.701 58.2634  29
   2   8   4 1219.64 63.9326  29
   2   8   5 1658.66 64.5520  31
   2   8   5 1677.44 69.6468  29
   2   8   6 45.1716 17.8459  27
   2   8   6 46.2836 16.3619  31
   2   8   6 44.9640 15.3852  29
   2   8   7 169.220 19.6368  31
   3   0 -15 100.980 17.2353   6
   3   0 -14 8.23382 18.5916   6
   3   0 -13 1398.56 75.9045   6
   3   0 -12-8.70482 25.0167   6
   3   0 -11 846.062 69.7229   6
   3   0 -10-4.84365 24.9873   6
   3   0  -9 5181.15 162.653   6
  -3   0   8-22.1229 33.5094   3
  -3   0   7 3522.48 188.192   3
   3   0  -7 3627.69 185.178  15
  -3   0   6 8.77696 25.2243   3
   3   0  -6 24.8720 28.6360  15
  -3   0   5 1705.76 118.150   3
   3   0  -4 6.54242 25.8412  12
  -3   0   4 13.8802 31.1835   3
  -3   0   3 28631.8 476.688   3
   3   0  -3 27762.5 464.001  12
   3   0  -2-28.2650 28.1392  12
  -3   0   2-11.6106 26.0849   3
   3   0  -2-5.82802 26.7755  14
  -3   0   1 1146.46 82.4662   3
   3   0  -1 1102.30 83.1665  14
  -3   0  -1 5110.85 169.295   9
  -3   0  -1 5464.13 179.483   1
  -3   0  -2 5.50403 24.1624   9
  -3   0  -2 17.5937 23.1639   1
  -3   0  -3 4231.61 163.624   9
  -3   0  -3 3827.35 171.940   1
  -3   0  -4-6.70925 21.3166  10
  -3   0  -4 33.0793 25.3509   9
  -3   0  -5 11309.5 304.353  10
  -3   0  -6 8.50488 24.4421  10
  -3   0  -7 2854.34 168.981  10
  -3   0  -8 17.6426 23.5256   6
  -3   0  -9 479.722 59.5692   6
  -3   0 -10 9.66775 24.0617   6
  -3   0 -11 2515.87 111.585   6
  -3   0 -12-8.56415 22.4680   6
   3   0  13 63.0368 26.6334   5
   3   0  14 7.77229 16.8328   5
   3   1 -14 711.907 46.7662   6
   3  -1 -14 578.496 42.3312   6
   3   1 -13 708.998 54.2749   6
   3  -1 -13 684.189 53.1928   6
   3  -1 -13 712.060 51.9169  21
   3   1 -12 480.108 51.1529   6
   3  -1 -12 387.195 44.3396  21
   3  -1 -12 392.903 47.8438   6
   3  -1 -11 290.094 42.1848  21
   3   1 -11 343.455 46.2878   6
   3  -1 -11 350.494 46.8354   6
   3  -1 -10 71.9812 28.2635  21
   3   1 -10 33.3611 29.9408   6
   3  -1 -10 37.9888 27.2968   6
   3   1  -9 850.142 68.2813   6
   3  -1  -9 830.006 69.4455   6
   3  -1  -9 774.117 65.4645  21
  -3  -1   8 44.1389 33.4320   3
  -3   1   8 55.4790 39.7748   3
   3  -1  -8 71.1199 26.5890  21
   3  -1  -8 76.8823 39.3712  15
  -3   1   7 1385.82 119.649  13
   3  -1  -7 1489.35 78.6460  21
  -3  -1   7 1512.22 126.586   3
  -3   1   7 1404.82 122.123   3
   3  -1  -7 1597.53 128.843  15
  -3   1   6 2049.21 136.595  13
  -3  -1   6 1843.05 129.608   3
  -3   1   6 1880.74 130.437   3
   3  -1  -6 1830.83 130.807  15
  -3   1   5 2563.11 144.233  13
  -3  -1   5 2165.00 131.581   3
  -3   1   5 2345.75 137.383   3
  -3   1   4 866.629 82.3667   3
   3  -1  -4 641.028 74.7122  12
  -3  -1   4 808.515 78.3151   3
  -3  -1   3 2963.55 139.792   3
  -3   1   3 2808.81 138.315   3
   3  -1  -3 2920.97 140.445  12
  -3  -1   2 632.919 63.6159   3
   3  -1  -2 644.984 67.8780  12
   3   1  -2 810.485 67.9111  12
  -3   1   2 771.108 70.5457   3
   3   1  -2 716.149 67.2042  14
   3  -1  -2 732.104 69.6296  14
  -3  -1   1 468.052 55.2962   3
  -3   1   1 444.665 55.3718   3
   3   1  -1 404.190 51.8259  14
   3  -1  -1 410.642 52.2465  14
   3   1   0 97.9106 29.9412  14
   3  -1   0 61.9601 28.0460  14
  -3  -1  -1 1254.76 90.7276   9
  -3  -1  -1 1131.06 81.2605   1
  -3   1  -1 1077.64 81.3399   1
  -3   1  -2 96.8393 30.6915   1
  -3  -1  -2 101.432 33.8234   9
  -3  -1  -2 98.4326 31.3882   1
  -3  -1  -3 14886.7 335.514   9
  -3   1  -3 14970.1 331.766   1
  -3  -1  -3 15114.6 329.322   1
  -3  -1  -4 4322.14 183.863   9
  -3   1  -5 742.252 83.5700  10
  -3  -1  -5 1051.31 96.6307   9
  -3   1  -6 1589.86 122.164  10
  -3  -1  -6 1510.33 120.945   9
   3   1   7 1066.43 69.7567  23
  -3   1  -7 892.408 97.4991  10
  -3  -1  -7 867.072 97.7404   9
   3   1   7 921.864 65.4950  30
  -3  -1  -7 953.920 65.5889   6
  -3   1  -7 1079.77 69.2197   6
   3   1   8 83.1794 30.0371  23
  -3  -1  -8 111.959 30.0440   6
  -3   1  -8 156.452 34.2685   6
  -3   1  -8 101.197 44.4206  10
   3   1   8 79.1909 30.9830  30
   3   1   9 5540.71 169.690  23
   3   1   9 5687.71 168.577  30
  -3  -1  -9 5738.42 167.273   6
  -3   1  -9 5783.15 171.010   6
   3   1  10 320.717 46.8453  23
  -3  -1 -10 246.495 41.6170   6
  -3   1 -10 198.262 40.1801   6
   3   1  10 314.387 43.4528  30
   3   1  11 633.761 59.6888  23
  -3  -1 -11 713.745 60.3157   6
  -3   1 -11 658.954 60.4966   6
   3   1  12 654.426 56.1116  23
  -3  -1 -12 639.700 55.1999   6
  -3   1 -12 702.888 58.4209   6
   3   1  13 215.257 31.1311   5
   3  -1  13 198.363 32.9710   5
   3   1  13 195.396 31.3368  23
   3   1  14 43.3828 17.0863   5
   3  -1  14 27.5238 19.6225   5
   3  -2 -14 154.594 22.6635  21
   3  -2 -13 1069.50 61.3962  21
   3  -2 -12 46.1393 23.8737  21
   3  -2 -11 552.757 55.3546  21
   3  -2 -10 1209.42 79.2208  21
   3  -2  -9 11839.4 250.651  21
  -3   2   8 2875.40 185.055  13
   3  -2  -8 2603.29 111.849  21
  -3   2   7 1322.85 123.041  13
   3  -2  -7 1422.75 79.5792  21
   3  -2  -7 1453.30 127.591  15
  -3   2   6 780.261 91.0139  13
   3  -2  -6 854.978 94.7101  15
  -3   2   5 2949.57 165.746  13
  -3   2   4 728.812 79.7104  13
   3  -2  -4 671.841 76.9129  12
   3  -2  -3 9050.88 262.707  12
  -3   2   3 8669.99 249.506   3
   3  -2  -2 6487.54 214.399  12
  -3   2   2 6434.97 204.928   3
  -3   2   2 6875.11 211.809  16
   3  -2  -1 12217.0 296.950  12
  -3   2   1 12622.0 294.698  16
  -3   2   0 11539.5 277.371   1
  -3  -2   0 11900.4 297.637   9
  -3   2  -1 3241.23 147.060   1
  -3  -2  -1 2905.21 144.376   9
  -3  -2  -2 3617.10 164.018   9
  -3   2  -2 3350.47 148.318   1
  -3  -2  -3 20846.3 439.484   9
  -3  -2  -4 559.864 72.0881   9
  -3   2  -5 772.502 83.8881  10
  -3  -2  -5 647.767 84.3477   9
  -3   2  -6 795.003 91.7598  10
  -3  -2  -6 934.614 100.860   9
  -3   2  -7 2905.91 175.748  10
  -3  -2  -7 2633.20 175.121   9
   3   2   7 2585.22 110.264  23
   3   2   7 2712.28 111.289  30
   3   2   7 2526.86 106.787  31
   3   2   8 2474.62 113.205  23
   3   2   8 2300.79 106.825  30
   3   2   8 2512.27 107.791  31
  -3   2  -8 2230.49 102.373   6
   3   2   9 15039.4 296.911  23
   3   2   9 14797.3 292.932  30
  -3   2  -9 15134.1 290.126   6
   3   2  10 1019.30 75.5609  23
   3   2  10 1144.89 77.8378  30
  -3   2 -10 904.847 68.7625   6
   3   2  11 3298.83 127.723  23
   3   2  11 3145.76 122.616  30
  -3   2 -11 3068.88 118.891   6
   3   2  12 94.0537 27.1474  23
   3  -2  12 56.0981 24.8290   5
   3   2  13 4346.65 123.472  23
   3  -2  13 4097.94 116.627   5
   3   2  14 282.918 27.9054  23
   3  -2  14 224.528 25.4209   5
   3  -3 -14 17.0592 12.5533  21
   3  -3 -13 628.736 44.4437  21
   3  -3 -12 206.504 33.9901  21
   3  -3 -11 137.665 33.8342  21
   3  -3 -10 743.700 63.7800  21
   3  -3  -9 2677.09 113.962  21
   3   3  -9 2327.54 112.050  26
   3  -3  -8 184.366 38.8006  21
  -3   3   7 249.999 61.4485  13
   3  -3  -7 240.016 38.5715  21
   3  -3  -7 249.190 60.4491  15
  -3   3   6 120.771 48.2043  13
   3  -3  -6 112.156 29.9801  21
   3   3  -6 116.953 30.5792  20
   3  -3  -6 93.7668 42.3515  15
  -3   3   6 60.5897 25.5696  18
  -3   3   5 1810.45 135.891  13
   3   3  -5 1964.82 88.1191  20
  -3   3   5 1985.21 92.8191  18
   3  -3  -5 1923.07 137.240  15
  -3   3   4 725.432 85.9585  13
  -3   3   3 663.040 79.3575  13
  -3   3   3 577.976 73.1103  16
  -3   3   2 73.2630 33.9968  16
  -3   3   1 1832.19 121.833  16
  -3  -3   1 1644.11 120.258   9
  -3  -3   0 2114.07 134.770   9
  -3   3   0 2473.05 139.469  16
  -3  -3  -1 711.745 79.3760   9
  -3   3  -1 702.260 78.5634  16
  -3   3  -2 187.184 44.8318  16
  -3  -3  -2 326.323 58.7831   9
  -3  -3  -3 374.957 62.0225   9
  -3   3  -3 343.358 57.9305  16
  -3   3  -4 613.168 80.0083  10
  -3  -3  -4 494.107 73.4922   9
  -3   3  -4 640.659 77.5126  16
  -3   3  -5 353.354 62.8444  10
  -3  -3  -5 590.712 83.6794   9
   3   3   5 495.017 49.0400  31
   3   3   6 889.520 65.3850  23
  -3  -3  -6 1009.52 108.639   9
   3   3   6 992.289 68.2515  31
   3   3   6 934.490 66.1762  30
   3   3   7 298.487 41.7635  23
   3   3   7 334.741 44.9090  30
   3   3   7 346.610 44.6394  31
   3   3   8 501.133 53.7098  23
   3   3   8 406.876 50.6394  30
   3   3   8 583.666 56.4590  31
   3   3   9 446.909 52.7532  23
   3   3   9 550.698 54.8447  31
   3   3   9 430.793 54.7890  30
   3   3  10 47.2811 27.5526  23
   3   3  10 23.0045 30.2177  30
   3   3  11 1053.97 69.8372  23
   3   3  11 1082.49 70.8704  30
   3   3  12 121.194 27.3366  23
   3   3  13 88.8563 21.9000  23
   3   3  14 15.1357 11.6181  23
   3  -4 -13 152.563 21.1342  21
   3  -4 -12 18.4810 18.0624  21
   3  -4 -11 156.417 29.4142  21
  -3   4  11 112.722 26.3839  28
   3  -4 -10 268.387 39.7918  21
  -3   4  10 261.682 37.6685  28
  -3   4   9 642.392 59.4529  28
   3   4  -9 644.075 64.0532  26
   3   4  -8 39.6765 26.8781  26
  -3   4   7 1717.36 94.4049  18
   3   4  -7 1847.11 100.004  26
   3   4  -6 34.2582 25.2908  20
  -3   4   6 57.7158 28.7760  18
  -3   4   5 1880.19 95.7539  18
   3   4  -5 1694.33 89.5183  20
   3   4  -4 246.513 38.1452  20
  -3   4   4 244.720 38.1517  18
   3  -4  -3 962.000 63.5790  22
  -3   4   3 871.334 64.5393  18
  -3   4   3 946.779 101.320  16
   3  -4  -2 856.095 58.6197  22
  -3   4   2 859.295 96.1952  16
  -3   4   2 922.293 62.7789  24
  -3   4   2 1091.84 68.9617  18
  -3   4   1 209.709 54.9830  16
  -3   4   0 347.191 63.1024  16
  -3   4  -1 1658.27 130.289  16
  -3   4  -1 1879.86 87.1778  24
  -3   4  -2 2177.78 148.665  16
   3   4   3 465.877 49.5301  31
  -3   4  -3 509.129 76.0138  16
   3   4   4-4.33287 22.3523  31
   3   4   5 132.302 35.2525  31
   3   4   6 482.281 54.3181  31
   3   4   7 4334.69 148.886  31
   3   4   8 140.685 34.8154  31
   3   4   8 122.440 35.3097  30
   3   4   9 3449.72 126.366  31
   3   4   9 3214.75 122.587  30
   3   4  10 226.922 35.2095  23
   3   4  10 209.926 37.3411  30
   3   4  11 27.0997 18.9231  23
   3   4  12 252.005 29.6179  23
   3   4  13 17.1757 11.9793  23
  -3   5  11 19.8735 17.8093  28
  -3   5  10 922.995 58.4450  28
  -3   5   9 76.2364 26.8456  28
   3   5  -9 123.568 32.3076  26
  -3   5   8 13.0850 22.1096  18
  -3   5   8 4.22808 23.6173  28
   3   5  -8 4.56821 24.7554  26
  -3   5   7 109.353 30.5642  18
  -3   5   7 93.6101 30.5065  28
   3   5  -7 87.2194 31.8332  26
  -3   5   6 446.176 52.1860  18
  -3   5   6 474.897 52.6917  28
   3   5  -6 550.681 59.5012  26
  -3   5   5 90.1233 32.5392  18
  -3   5   5 88.4102 28.7308  24
  -3   5   4 3556.91 137.092  18
   3   5  -4 3539.86 138.913  29
  -3   5   4 3536.66 129.844  24
  -3   5   3 297.336 44.3754  18
  -3   5   3 296.524 40.9631  24
  -3   5   2 571.622 55.3705  18
  -3   5   2 577.890 54.5004  24
  -3   5   1 8.80264 21.0817  24
  -3   5   1 23.7740 32.2082  16
  -3   5   0 1344.05 129.212  16
  -3   5   0 1223.75 76.2960  24
  -3   5  -1 8.83680 24.3150  24
  -3   5  -1 23.3485 33.5505  16
  -3   5  -2 75.5824 26.9446  24
  -3   5  -3 796.699 63.9529  24
   3   5   4 836.622 67.1851  31
  -3   5  -4 731.620 62.2143  24
   3   5   5 52.1809 29.8021  31
   3   5   6 80.7832 32.1960  31
   3   5   7 9.22810 25.0038  31
   3   5   8 232.056 37.7810  31
   3   5   9 533.663 49.2554  31
  -3   5 -10 1260.85 61.9629  20
   3   5  10 1181.70 64.0526  31
  -3   6  10 55.0793 17.3452  28
  -3   6   9 661.162 46.3829  28
   3   6  -9 653.900 48.8895  26
  -3   6   8 48.6782 21.5423  28
   3   6  -8 49.9647 26.2641  26
  -3   6   7 68.4783 25.6034  18
  -3   6   7 72.1540 24.6884  28
   3   6  -7 121.605 30.8270  26
  -3   6   7 45.9618 22.7279  24
  -3   6   6 282.415 41.4653  18
  -3   6   6 259.997 37.9392  28
   3   6  -6 207.282 39.6819  26
  -3   6   6 196.923 35.0441  24
  -3   6   5 742.038 61.6989  18
  -3   6   5 692.327 60.0164  24
  -3   6   4 4524.14 152.598  18
  -3   6   4 4353.88 143.644  24
  -3   6   3 877.153 69.1341  18
   3   6  -3 925.746 72.1926  29
  -3   6   3 828.299 66.6602  24
   3   6  -2 9916.23 238.294  29
  -3   6   2 10425.8 232.687  24
  -3   6   1 3545.97 131.323  24
  -3   6   0 328.902 46.6052  24
   3   6   0 344.775 46.3730  27
  -3   6  -1 989.661 71.9485  24
  -3   6  -2 2101.79 101.879  24
  -3   6  -3 3791.45 132.874  24
   3   6   4 9183.23 213.465  31
  -3   6  -4 9163.18 209.238  24
  -3   6  -5 155.700 32.4817  24
   3   6   5 176.025 35.8816  31
   3   6   6 181.399 35.7962  31
   3   6   7 323.457 40.6856  31
   3   6   8 166.948 29.3506  31
  -3   6  -8 172.083 29.5284  20
  -3   6  -9 428.643 35.7875  20
   3   6   9 317.249 33.6969  31
  -3   6 -10 3.69509 13.7094  20
   3   7  -8 46.0980 16.9181  26
   3   7  -7 84.9926 23.1914  26
   3   7  -6 140.632 27.9340  26
  -3   7   6 57.0455 21.3534  24
   3   7  -5 157.500 30.9297  26
  -3   7   5 100.242 26.1225  24
  -3   7   4 986.881 63.1774  24
  -3   7   3 692.427 56.0135  24
   3   7  -2 288.901 41.9863  29
  -3   7   2 337.844 41.8552  24
   3   7  -1 473.749 50.4273  29
  -3   7   1 707.627 57.1830  24
   3   7   0 407.729 46.9855  29
  -3   7   0 348.408 43.0460  24
   3   7   1 214.906 36.8100  29
   3   7   1 202.087 37.0960  27
  -3   7  -1 151.605 33.1158  24
   3   7   2 997.540 69.5418  27
  -3   7  -2 1007.22 63.8802  24
   3   7   3 118.843 30.6724  27
  -3   7  -3 82.4873 26.5577  24
   3   7   4 109.003 30.3109  27
   3   7   5 376.690 42.5085  27
   3   7   5 393.210 38.6205  31
  -3   7  -6 341.352 33.3136  20
   3   7   6 366.314 35.7368  31
   3   7   6 378.343 39.2102  27
   3   7   7 65.9252 19.0078  31
  -3   7  -7 41.1558 17.4904  20
   3   7   7 56.3915 19.2306  27
  -3   7  -8 80.5169 17.0333  20
   3   7   8 93.3676 17.6928  31
   3   8  -5 10.6377 13.2653  26
   3   8  -4 217.939 26.0737  26
  -3   8   4 128.132 21.2293  24
   3   8  -3-4.72694 15.3560  26
  -3   8   3-4.44842 13.6432  24
  -3   8   2 304.386 31.1817  24
  -3   8   1 38.6097 18.0576  24
   3   8   0 18.8924 16.1473  29
  -3   8   0 26.2175 16.4656  24
   3   8   1-13.1131 14.6495  29
  -3   8  -1 27.2863 16.1545  24
   3   8   2 310.025 32.5935  27
   3   8   3-2.37124 14.1858  27
   3   8   4 374.656 32.0950  27
   3   8   5 12.7327 11.5584  27
   3   8   5-1.71137 12.2684  19
   4   0 -13 15.6072 17.9695   6
   4   0 -12 355.399 41.5258   6
   4   0 -11-4.13784 22.4232   6
   4   0 -10 11292.6 245.402   6
   4   0  -9 4.82350 25.7271   6
   4   0  -8 5475.83 161.684  21
   4   0  -7 29.6683 26.6254  21
  -4   0   6 1288.05 127.872   3
   4   0  -5-19.4789 30.9441  12
  -4   0   5 31.0839 32.9199   3
   4   0  -4 5927.70 237.925  12
  -4   0   4 6187.72 246.629   3
   4   0  -3-8.59092 32.9192  12
  -4   0   3-17.9445 30.9900   3
   4   0  -2 25344.2 502.097  12
  -4   0   2 26033.0 508.142   3
   4   0  -2 24837.0 504.975  14
   4   0  -1 16.8310 25.4937  14
  -4   0   0 2352.01 140.821   1
   4   0   0 2519.71 145.114  14
   4   0   1 8.44130 21.3948  14
  -4   0  -1 8.42783 27.9676   1
  -4   0  -2 10185.5 306.609   1
  -4   0  -3 9.15181 26.3013   1
  -4   0  -4 845.724 90.9474  10
   4   0   5-4.16758 22.2286   5
   4   0   6 8411.40 203.261   5
   4   0   7-4.63382 26.2616   5
   4   0   8 2923.32 122.674   5
   4   0   9 4.73246 21.7420   5
   4   0  10 3632.83 134.445   5
   4   0  11 3.98877 20.9290   5
   4   0  12 3320.00 109.080   5
   4   0  13 2.41757 14.6472   5
   4   1 -13 125.169 22.7261   6
   4  -1 -13 76.6903 21.1830   6
   4  -1 -12 292.325 34.6018  21
   4   1 -12 271.300 36.0470   6
   4  -1 -12 241.219 34.2824   6
   4  -1 -11 158.994 32.4910  21
   4   1 -11 154.500 32.8926   6
   4  -1 -11 158.666 34.0133   6
   4   1 -10 1027.53 73.0011   6
   4  -1 -10 1168.92 76.8677   6
   4  -1 -10 1019.01 70.4481  21
   4   1  -9 1278.20 82.9249   6
   4  -1  -9 1190.09 81.2155   6
   4  -1  -9 1217.07 78.7237  21
   4  -1  -8 91.0960 31.4738  21
   4  -1  -7 223.040 37.5452  21
  -4   1   6 427.961 74.8170  13
   4  -1  -6 359.379 44.4511  21
  -4  -1   6 455.055 76.7397   3
  -4   1   6 438.496 75.4659   3
   4  -1  -6 307.165 68.1371  15
  -4   1   5 919.839 102.077  13
   4  -1  -5 887.071 100.764  12
  -4  -1   5 822.320 95.7762   3
  -4   1   5 1012.29 105.132   3
   4  -1  -4 68.6450 37.5847  12
  -4  -1   4 76.2809 40.8570   3
  -4   1   4 155.442 49.2526   3
   4  -1  -3 984.386 100.860  12
  -4  -1   3 1094.80 102.688   3
  -4   1   3 1004.20 99.7071   3
   4  -1  -2 606.613 86.0353  12
   4  -1  -2 600.320 77.6784  14
   4   1  -1 492.157 67.9147  14
   4  -1  -1 420.247 65.3254  14
  -4  -1   0 214.409 48.0856   1
  -4   1   0 273.227 52.4037   1
  -4  -1   0 97.1450 45.5937   9
   4   1   0 231.385 50.7205  14
   4  -1   0 272.554 54.1515  14
   4   1   1 91.8206 38.3547  14
   4  -1   1 112.148 38.7674  14
  -4  -1  -1 141.390 43.6440   1
  -4  -1  -1 8.86713 36.0441   9
  -4   1  -1 60.3891 33.0635   1
  -4  -1  -2 3739.22 189.181   9
  -4   1  -2 3670.60 182.407   1
  -4  -1  -2 4247.08 191.870   1
  -4  -1  -3 3484.58 184.632   9
   4   1   4 737.105 58.0362  23
  -4   1  -4 655.920 82.6684  10
  -4  -1  -4 680.831 85.0764   9
   4  -1   4 725.260 57.2517   5
   4   1   5 834.886 64.0323  23
  -4   1  -5 889.439 98.0907  10
  -4  -1  -5 1037.17 109.933   9
   4   1   5 803.281 61.4498   5
   4  -1   5 881.133 64.7046   5
   4   1   6 153.099 35.0184  23
   4   1   6 141.958 32.9926   5
   4  -1   6 116.348 31.5277   5
  -4  -1  -6 174.777 51.1669   9
   4   1   7 222.195 40.6575  23
   4   1   7 291.459 41.9190   5
   4  -1   7 229.189 39.6274   5
   4   1   8 1040.70 74.5459  23
   4   1   8 1015.46 71.5717   5
   4  -1   8 970.561 71.4655   5
   4   1   9 2508.51 113.005  23
   4   1   9 2378.80 106.433   5
   4  -1   9 2484.34 112.847   5
   4   1  10 300.844 43.5242  23
   4   1  10 320.815 44.1930   5
   4  -1  10 324.520 44.5409   5
   4   1  11 535.572 50.1747  23
   4   1  11 570.370 48.9930   5
   4  -1  11 522.049 49.8125   5
   4   1  12 109.102 23.1460  23
   4   1  12 98.2657 24.5531   5
   4  -1  12 89.6119 24.9216   5
   4   1  13 79.7907 18.3375   5
   4  -1  13 77.1073 20.0315   5
   4  -2 -13 327.652 28.6103  21
   4  -2 -12 161.866 28.8084  21
   4  -2 -11 104.596 29.1269  21
   4  -2 -10 1700.10 88.4191  21
   4  -2  -9 49.5129 26.9313  21
   4  -2  -8 92.5538 34.6328  21
   4  -2  -7 1939.35 98.8899  21
  -4   2   6 352.123 70.8333  13
   4  -2  -6 434.393 49.2693  21
   4  -2  -6 371.973 74.5704  15
  -4   2   5 22.9973 31.1558  13
  -4   2   5-9.03367 23.3013  18
  -4   2   4 4237.94 218.490  13
   4  -2  -4 4003.29 209.162  12
   4  -2  -4 4244.80 132.698  22
  -4   2   4 4494.65 144.396  18
   4  -2  -3 1406.99 119.539  12
   4  -2  -3 1515.21 76.7763  22
   4   2  -3 1379.41 79.9547  19
  -4   2   3 1369.64 78.6392  18
   4  -2  -2 323.698 61.2419  12
   4  -2  -1 1246.29 111.110  12
  -4  -2   1 1165.81 113.371   9
  -4   2   1 1195.61 108.101   1
  -4   2   1 1067.99 102.988  16
  -4   2   0 536.121 75.4616   1
  -4  -2   0 602.751 81.5722   9
  -4   2   0 587.440 75.6312  16
  -4   2  -1 5390.74 221.134   1
  -4  -2  -1 4755.20 219.870   9
  -4  -2  -2 1425.43 122.844   9
  -4   2  -2 1304.90 110.198   1
   4   2   3 786.301 59.7431  23
  -4  -2  -3 600.843 82.4543   9
   4   2   4 1255.00 78.2834  23
  -4   2  -4 1096.64 115.596  10
  -4  -2  -4 1168.91 117.528   9
   4   2   5 198.242 37.5168  23
  -4   2  -5 215.123 60.4154  10
  -4  -2  -5 229.356 56.6790   9
   4   2   6 211.591 39.9276  23
   4  -2   6 168.616 39.2224   5
   4   2   7 5775.20 177.460  23
   4  -2   7 5959.97 173.736   5
   4   2   8 1044.37 75.8854  23
   4  -2   8 1125.37 75.4944   5
   4   2   9 4.80451 25.6258  23
   4  -2   9-4.43995 21.6876   5
   4   2  10 167.198 36.0404  23
   4  -2  10 166.751 35.3092   5
   4   2  11 790.305 58.1273  23
   4  -2  11 809.709 57.1421   5
   4   2  12 86.3118 21.9147  23
   4  -2  12 103.960 23.0113   5
   4   2  13 57.1432 16.2464  23
   4  -2  13 53.5537 15.6308   5
   4  -3 -12 84.7317 21.3933  21
   4  -3 -11 719.880 51.3348  21
   4  -3 -10 217.880 35.8534  21
   4  -3  -9 335.286 47.9269  21
   4  -3  -8 8.87136 22.0796  21
   4  -3  -7 1422.84 85.2690  21
   4  -3  -6 17.7495 24.0466  21
  -4   3   6 9.61647 23.0308  18
  -4   3   5 1041.64 74.0072  18
  -4   3   4 1048.74 115.363  13
   4  -3  -4 1147.48 74.1874  22
  -4   3   4 1295.73 81.1882  18
  -4   3   3 363.029 68.3821  13
   4  -3  -3 403.737 46.1514  22
  -4   3   3 425.678 48.4727  18
   4  -3  -2 224.905 33.8058  22
  -4  -3   2 157.189 52.7217   9
   4   3  -2 185.131 36.8710  19
  -4   3   2 210.884 35.4880  18
   4   3  -2 233.166 38.6990  27
   4  -3  -1 95.1814 27.4096  22
  -4  -3   1 154.657 49.6437   9
   4   3  -1 134.840 34.2239  19
  -4   3   1 138.769 30.8206  18
   4   3  -1 122.715 32.5932  27
   4   3   0 252.827 41.5968  27
   4  -3   0 230.029 34.6770  22
  -4  -3   0 275.146 64.1659   9
  -4   3   0 271.285 58.3205  16
  -4  -3  -1 634.511 89.9679   9
   4   3   1 562.297 55.2494  27
  -4   3  -1 423.784 70.4604  16
  -4  -3  -2 332.621 68.6583   9
   4   3   2 239.354 40.2835  27
  -4   3  -2 345.647 63.8301  16
   4   3   3 907.308 69.8366  27
  -4   3  -3 806.348 99.0078  16
   4   3   4 1312.02 78.8691  23
   4   3   4 1186.59 76.6609  31
  -4   3  -4 1094.82 114.380  16
   4   3   5 1157.56 75.9606  23
   4   3   5 1108.88 75.8259  31
   4   3   6 210.860 38.7239  23
   4   3   6 210.323 38.6253  31
   4   3   7 1223.73 80.3883  23
   4   3   8 42.5457 26.7938  23
   4   3   9 3194.79 121.890  23
   4   3  10 90.2789 27.1256  23
   4   3  11 165.785 28.5750  23
   4   3  12 9.74933 14.9507  23
   4  -4 -11 92.7369 20.9671  21
   4  -4 -10 528.218 44.5181  21
  -4   4  10 428.007 39.8966  28
   4  -4  -9 134.764 30.7197  21
  -4   4   9 139.197 31.4076  28
  -4   4   7 110.851 33.7100  18
  -4   4   6 848.870 67.6221  18
  -4   4   5 996.080 74.2383  18
  -4   4   4 2586.71 116.325  18
   4  -4  -3 2452.96 107.603  22
  -4   4   3 2769.33 119.179  18
   4  -4  -2 2037.21 98.8643  22
   4   4  -2 1749.18 101.577  19
  -4   4   2 2015.15 101.567  18
   4  -4  -1 1670.23 87.5189  22
  -4   4   1 1730.57 91.0863  18
   4   4  -1 1651.93 93.9814  27
  -4   4   0 174.869 33.7189  24
   4  -4   0 123.365 30.5249  22
   4   4   0 194.116 39.6293  27
  -4   4  -1 321.401 44.2776  24
   4  -4   1 273.069 40.9266  22
   4  -4   2 16993.5 302.958  22
   4   4   2 17187.5 325.925  27
   4   4   3 3790.34 143.237  27
   4   4   4 3551.51 130.253  31
   4   4   4 3361.81 135.606  27
   4   4   5 60.9655 28.4177  31
   4   4   6 712.954 61.4126  31
   4   4   7 1167.63 75.9041  31
   4   4   8 2738.98 108.019  23
   4   4   9 1311.29 72.2230  23
   4   4  10 2045.40 81.5690  23
   4   4  11 142.785 22.4227  23
  -4   5  10 37.2468 16.2609  28
  -4   5   9 307.919 34.4299  28
  -4   5   8 27.9721 21.7076  18
  -4   5   8-3.39168 19.7637  28
  -4   5   7 32.5111 23.6832  18
  -4   5   7 53.1142 24.1104  28
  -4   5   6 1309.50 79.8342  18
  -4   5   5 122.558 33.1988  18
  -4   5   4 178.177 35.7651  18
  -4   5   3 768.482 63.2542  18
   4  -5  -2 2993.26 118.022  22
   4   5  -2 2950.13 126.739  19
  -4   5   2 3014.08 122.215  18
  -4   5   2 3104.62 119.408  24
  -4   5   1 191.104 39.0694  24
   4  -5  -1 246.536 39.7366  22
   4   5  -1 267.429 45.6803  27
  -4   5   0-4.50698 21.5876  24
   4   5   0 25.1528 27.6836  27
   4   5   1 1661.41 96.2104  27
  -4   5  -1 1741.04 92.7816  24
   4   5   2 1617.70 96.0865  27
  -4   5  -2 1490.89 87.1336  24
  -4   5  -3 163.236 35.3061  24
   4   5   3 101.921 34.5377  27
  -4   5  -4 280.646 40.3338  24
   4   5   4 292.133 41.6368  31
   4   5   4 301.220 45.9291  27
   4   5   5 896.992 65.5713  31
   4   5   5 907.550 68.1802  27
  -4   5  -5 868.055 65.3952  24
   4   5   6 431.961 47.4058  31
  -4   5  -6 489.098 49.7403  24
  -4   5  -7 18.3535 20.5055  24
   4   5   7 46.3575 23.1124  31
  -4   5  -8-25.4176 20.6440  24
  -4   5  -9 143.721 23.3556  24
  -4   5 -10 48.7580 15.7658  20
  -4   6   9 11.5731 11.0869  28
  -4   6   8 103.432 20.7814  28
  -4   6   7 256.977 32.9530  18
  -4   6   7 236.167 30.1319  28
  -4   6   6 48.3598 20.9308  18
  -4   6   6 29.2626 20.2170  28
  -4   6   5 219.438 35.1885  18
  -4   6   4 11.9347 19.0555  18
  -4   6   4 24.8441 22.0347  24
  -4   6   3 412.523 44.8086  18
  -4   6   3 386.981 43.8947  24
  -4   6   2 15.8350 22.1133  24
   4   6  -1 49.3433 27.1806  19
  -4   6   1 44.6990 25.5293  24
   4   6   0 61.4268 30.0240  27
  -4   6   0 94.7034 28.7236  24
  -4   6  -1 139.832 31.5399  24
   4   6   1 135.113 33.7169  27
  -4   6  -2 242.823 37.8444  24
   4   6   2 247.858 41.2344  27
  -4   6  -3 254.333 37.7207  24
   4   6   3 206.440 37.9193  27
  -4   6  -4 136.939 29.4668  24
   4   6   4 91.3538 29.7834  27
  -4   6  -5 279.124 34.8933  24
   4   6   5 264.086 35.0054  31
   4   6   5 279.560 39.0469  27
  -4   6  -6 253.133 32.3424  24
   4   6   6 237.901 33.8326  27
  -4   6  -7 439.569 36.4106  24
  -4   6  -8 379.705 31.3770  20
  -4   6  -9 207.426 21.0295  20
  -4   7   5 134.754 21.5451  24
  -4   7   4 330.520 32.2288  24
  -4   7   3 443.483 38.1141  24
  -4   7   2 103.532 24.6570  24
   4   7  -1 12.3843 18.7592  19
  -4   7   1 38.8153 20.8241  24
   4   7   0-19.6619 21.0586  19
  -4   7   0 6.03341 16.6012  24
   4   7   1 23.2835 22.0797  19
   4   7   1 34.2214 20.6518  27
   4   7   2 265.713 36.3929  19
   4   7   2 212.147 31.6973  27
  -4   7  -2 264.818 31.7624  24
   4   7   3 33.2720 22.0714  19
   4   7   3 50.9552 20.3081  27
  -4   7  -3 66.2467 20.4703  24
   4   7   4 224.410 31.2848  19
   4   7   4 178.439 28.1290  27
  -4   7  -4 198.970 27.2813  24
   4   7   5 172.322 25.3402  27
  -4   7  -5 229.734 24.7894  24
   4   7   6 213.328 24.2068  27
   5   0 -12 22.5323 14.5538   6
   5   0 -11 389.211 38.4249   6
   5   0 -10 24.9163 21.0206   6
   5   0  -9 189.664 36.0200   6
   5   0  -8-20.1136 23.7558  21
   5   0  -7 1984.79 99.1699  21
   5   0  -6-8.86216 22.8590  21
   5   0  -5 890.494 71.1742  19
   5   0  -4 14.9778 27.4751  19
   5   0  -4 19.6192 24.4151  25
   5   0  -3 760.554 68.7177  19
   5   0  -3 651.011 62.0651  25
   5   0  -2-11.2196 35.6469  12
   5   0  -2-14.8937 26.4794  19
   5   0  -2 14.7242 23.0337  25
   5   0  -2 4.46758 23.0472   5
   5   0  -1 4160.95 218.221  12
   5   0  -1 3823.14 142.491  19
   5   0  -1 3604.15 130.611   5
   5   0  -1 3973.85 143.291  25
   5   0  -1 4019.75 219.890  14
  -5   0   1 3844.68 217.000   1
  -5   0   0-11.5041 33.0614   1
   5   0   0-4.80591 26.8450  19
   5   0   0-9.59492 24.7491  25
   5   0   0-23.0140 31.1786  14
   5   0   0 8.84961 23.9783   5
  -5   0  -1 5094.12 247.265   1
   5   0   1 5410.49 165.896  19
   5   0   1 5319.94 162.143   5
   5   0   1 5530.26 167.044  25
   5   0   1 5704.00 259.750  14
   5   0   2 4.51473 21.6248   5
   5   0   2 23.5644 29.8623  14
   5   0   3 119.543 32.0813   5
   5   0   4-14.0744 27.3375  23
   5   0   4 4.67675 21.9482   5
   5   0   5 1307.20 81.0839  23
   5   0   5 1306.43 81.3609   5
   5   0   6 9.46510 24.8316   5
   5   0   7 8501.15 208.842   5
   5   0   8-4.37608 24.0819   5
   5   0   9 35.6578 24.0062   5
   5   0  10 10.1612 19.7368   5
   5   0  11 471.124 39.1775   5
   5   0  12 1.85809 12.0724   5
   5   1 -12 649.085 37.7127   6
   5  -1 -12 504.112 34.5362   6
   5  -1 -11 46.6576 18.2317  21
   5   1 -11 113.972 23.6907   6
   5  -1 -11 69.7322 21.0388   6
   5   1 -10 559.961 48.0626   6
   5  -1 -10 474.893 45.8221   6
   5  -1 -10 534.132 45.5943  21
   5   1  -9 541.522 50.3492   6
   5  -1  -9 508.669 51.9699   6
   5  -1  -9 524.263 50.6498  21
   5  -1  -8 327.555 44.8826  21
   5  -1  -7 35.7138 28.6896  21
   5  -1  -6 261.501 41.9827  21
  -5   1   5 856.955 67.5416  18
   5   1  -4 1029.93 75.7915  19
  -5   1   4 976.348 72.8679  18
   5   1  -4 1054.20 75.9819  25
   5  -1  -3 141.908 36.3543  19
   5   1  -3 130.226 33.6109  19
   5   1  -3 181.199 36.6629  25
   5  -1  -2 93.9242 47.7279  12
   5  -1  -2 120.227 35.2792  19
   5   1  -2 120.123 33.2346  19
   5   1  -2 122.253 32.4147   5
   5  -1  -2 149.007 35.9376  25
   5  -1  -2 76.3589 30.7459   5
   5   1  -2 177.714 36.6450  25
   5  -1  -1 70.5082 38.9984  12
   5  -1  -1 39.3342 31.2454  19
   5   1  -1 54.6574 31.2155  19
   5  -1  -1 53.8176 29.6445  25
   5   1  -1 44.4149 27.5686  25
   5   1  -1 34.6553 24.5535   5
   5  -1  -1 66.9988 29.3365   5
   5  -1  -1 11.7065 29.6727  14
   5  -1   0 165.105 54.1930  12
  -5  -1   0 94.1940 56.4082   9
  -5  -1   0 101.601 41.9002   1
   5  -1   0 158.475 36.5330  19
   5   1   0 137.432 36.7418  19
   5  -1   0 148.584 35.8798  25
   5   1   0 107.990 33.2705  25
   5   1   0 155.374 33.6090   5
   5   1   0 135.698 48.4594  14
   5  -1   0 116.389 52.3091  14
   5  -1   0 160.713 34.4983   5
   5   1   1 69.4368 27.5791   5
   5  -1   1 13.4944 22.8040   5
   5   1   1 53.0789 29.6006  19
   5   1   1 91.0219 39.3000  14
   5  -1   1 11.7346 35.5498  14
   5   1   2 131.747 32.5947   5
   5  -1   2 41.0137 25.4651   5
   5   1   2 69.2696 44.2442  14
   5  -1   2 178.886 55.9723  14
   5   1   3 139.697 33.2945  23
   5   1   3 129.239 33.6333   5
   5  -1   3 120.543 32.0459   5
   5   1   4 219.596 41.3225  23
   5   1   4 189.664 38.2450   5
   5  -1   4 207.114 42.0951   5
   5   1   5 495.819 55.2096  23
   5   1   5 545.725 55.4430   5
   5  -1   5 475.100 53.6358   5
   5   1   6 992.928 73.1707  23
   5   1   6 975.691 69.7459   5
   5  -1   6 1021.29 73.6585   5
   5   1   7 343.496 45.6020  23
   5   1   7 319.768 41.8363   5
   5  -1   7 280.889 42.8500   5
   5   1   8 707.227 58.6398  23
   5   1   8 743.617 58.8381   5
   5  -1   8 758.539 61.7627   5
   5   1   9 864.209 61.3734  23
   5   1   9 979.847 63.1839   5
   5  -1   9 952.240 64.8007   5
   5   1  10 189.172 29.6738  23
   5   1  10 132.522 26.6074   5
   5  -1  10 179.087 29.6657   5
   5   1  11 56.9502 17.9119  23
   5   1  11 40.1391 17.8136   5
   5  -1  11 31.2231 17.9776   5
   5  -1  12 51.6358 15.2624   5
   5  -2 -11 1159.67 54.6126  21
   5  -2 -10 837.986 54.4483  21
   5  -2  -9 1107.66 67.7128  21
   5  -2  -8 36.6535 24.9831  21
   5  -2  -7 174.995 36.0823  21
   5  -2  -6 612.159 56.5867  21
  -5   2   6 733.696 61.3164  18
   5  -2  -5 967.309 72.0261  21
  -5   2   5 832.938 67.7918  18
   5   2  -4 6684.46 189.782  19
  -5   2   4 6483.15 187.166  18
   5  -2  -3 1100.40 72.1329  22
  -5   2   3 985.013 76.0269  18
   5   2  -3 915.479 72.7396  25
   5   2  -2 617.679 62.4911  19
  -5   2   2 552.890 58.5110  18
   5   2  -1 2001.16 106.014  19
  -5   2   1 2131.84 105.772  18
   5  -2   0 602.412 54.8082  22
   5   2   0 534.371 58.2989  19
  -5   2   0 581.971 56.3636  18
   5  -2   1 10209.4 223.115  22
   5   2   1 10531.9 243.257  19
   5  -2   1 10147.8 229.826   5
   5   2   2 6146.90 180.799  19
   5  -2   2 6384.45 175.834   5
   5   2   3 4301.80 148.748  23
   5  -2   3 3915.85 137.268   5
   5   2   4 1700.11 97.6393  23
   5  -2   4 1689.48 95.1073   5
   5   2   5 2417.87 112.257  23
   5  -2   5 2380.14 107.579   5
   5   2   6 19.3308 26.9961  23
   5  -2   6 53.7139 31.5114   5
   5   2   7 286.746 42.5507  23
   5  -2   7 231.408 37.4624   5
   5   2   8 183.581 35.2097  23
   5  -2   8 150.255 30.8042   5
   5   2   9 1769.82 84.9879  23
   5  -2   9 1783.09 81.8584   5
   5   2  10 74.4162 22.0409  23
   5  -2  10 102.981 24.3678   5
   5   2  11 300.500 28.8634  23
   5  -2  11 300.355 28.8986   5
   5  -3 -11 9.04177 12.7302  21
   5  -3 -10 2.50453 18.1139  21
   5  -3  -9 93.0278 26.9111  21
   5  -3  -8 168.762 32.8439  21
   5  -3  -7 98.6787 29.5471  21
  -5   3   7 123.326 30.0059  18
   5  -3  -6 2062.42 96.6850  21
  -5   3   6 2222.03 104.828  18
   5  -3  -5 94.2903 33.8618  21
  -5   3   5 48.0940 29.8637  18
  -5   3   4 361.764 49.4306  18
   5  -3  -3 2193.33 101.767  22
   5   3  -3 2396.38 112.950  19
  -5   3   3 2379.05 111.335  18
   5  -3  -2 455.452 49.0567  22
   5   3  -2 611.426 60.0466  19
  -5   3   2 555.903 56.6372  18
   5   3  -1 536.208 59.3967  19
  -5   3   1 433.164 51.0689  18
   5  -3   0 1449.47 83.5425  22
   5   3   0 1398.24 90.4936  19
   5  -3   1 5348.77 160.027  22
   5   3   1 5501.37 175.516  19
   5  -3   2 304.897 41.9349  22
   5   3   2 263.244 45.2982  19
   5   3   4 747.659 62.9885  23
   5   3   5 1332.52 81.8652  23
   5   3   6 160.346 36.7294  23
   5   3   7 554.799 52.7691  23
   5   3   8 499.429 47.5027  23
   5   3   9 1129.51 62.8968  23
   5   3  10 76.3862 19.3710  23
   5   3  11 79.9494 15.8893  23
  -5   4  10 41.1592 13.8438  28
  -5   4   9 4.77701 14.6510  28
  -5   4   8 5.98711 18.1370  28
  -5   4   7 220.378 33.4276  18
  -5   4   6 229.113 36.1861  18
  -5   4   5 159.274 33.6672  18
  -5   4   4 942.819 69.1928  18
   5  -4  -3 68.5588 29.6065  22
   5   4  -3 88.5302 33.1087  19
  -5   4   3 65.7460 29.8476  18
   5  -4  -2-21.7662 23.2192  22
   5   4  -2-24.5077 30.0659  19
  -5   4   2 4.67019 20.9846  18
   5  -4  -1 91.7213 31.3128  22
   5   4  -1 15.1339 26.0267  19
  -5   4   1 41.0403 26.5741  18
   5  -4   0 445.099 49.2745  22
   5   4   0 530.395 59.3731  19
   5  -4   1 333.940 43.2871  22
   5   4   1 384.928 51.4417  19
   5   4   1 394.154 49.7007  27
   5  -4   2 8.59232 20.9853  22
   5   4   2-4.93998 27.5938  19
   5   4   2 4.99992 25.3448  27
   5  -4   3 910.987 65.3291  22
   5   4   3 852.937 68.7249  19
   5   4   3 930.947 72.0500  27
  -5   4  -3 863.326 62.8595  24
  -5   4  -4 369.988 43.3847  24
   5  -4   4 326.658 42.9148  22
   5  -4   5 166.460 31.9322  22
   5  -4   6 267.627 36.0856  22
   5  -4   7 66.5511 21.2585  22
   5   4   8 39.2695 18.6177  23
   5  -4   8 16.0355 16.1938  22
  -5   4  -9 53.6707 17.8918  24
   5  -4   9 76.9241 17.8223  22
  -5   4 -10 270.613 24.3324  24
  -5   5   8 262.233 27.2334  18
  -5   5   8 339.063 29.9597  28
  -5   5   7 182.646 27.8073  18
  -5   5   7 200.031 28.1248  28
  -5   5   6 12.9276 17.2382  18
  -5   5   6 5.79074 16.6421  28
  -5   5   5 18.0376 21.5823  18
  -5   5   4 211.747 36.7397  18
  -5   5   3 110.926 27.1187  18
   5   5  -2 242.944 38.5243  19
  -5   5   2 170.057 31.5153  18
   5  -5  -1 41.7730 23.8563  22
   5   5  -1 8.80061 24.9391  19
   5  -5   0 393.670 44.7180  22
   5   5   0 521.495 53.9220  19
  -5   5  -1-14.9948 19.9944  24
   5  -5   1 3.72353 17.8349  22
   5   5   1 4.47244 24.9822  19
   5   5   1 4.41489 25.0208  27
  -5   5  -2 101.042 27.5561  24
   5  -5   2 140.763 29.5595  22
   5   5   2 125.672 33.2268  19
   5   5   2 126.294 34.6696  27
  -5   5  -3 139.199 30.6048  24
   5  -5   3 96.2909 25.5335  22
   5   5   3 73.2992 28.4134  19
   5   5   3 121.094 33.4791  27
   5  -5   4 1788.92 78.5726  22
   5   5   4 1675.37 83.8263  27
  -5   5  -4 1695.77 80.5436  24
  -5   5  -5 113.957 27.5635  24
  -5   5  -6 14.5838 17.4499  24
  -5   5  -7 703.558 45.0769  24
  -5   5  -8 335.499 28.2101  24
  -5   6   6 21.8633 14.6262  18
  -5   6   5-2.35620 13.1613  18
  -5   6   4 15.5608 14.9072  18
  -5   6   3 73.0013 20.2386  18
   5   6  -2 126.865 26.8342  19
   5   6  -1 125.178 28.0346  19
  -5   6   1 137.454 26.6205  24
   5   6   0 90.0755 26.3567  19
  -5   6   0 25.6293 17.8927  24
   5   6   1 542.969 47.8220  19
  -5   6  -1 430.051 39.2412  24
   5   6   2 185.481 31.7319  19
  -5   6  -2 202.475 29.0612  24
  -5   6  -3 42.8057 18.8376  24
   5   6   3 52.8285 19.8846  19
  -5   6  -4 56.5343 18.2452  24
   5   6   4 53.2044 20.7418  19
  -5   6  -5 114.230 20.4620  24
  -5   6  -6 454.612 30.8118  24
   5   7   0 3.48658 12.6087  19
  -5   7   0 20.4840 11.8859  24
   5   7   1 12.4193 13.1651  19
  -5   7  -1-6.29608 10.3373  24
   6   0 -10 62.6332 16.3738   6
   6   0  -9-5.04823 15.8559   6
   6   0  -8 77.8127 24.5962   6
   6   0  -7 35.4256 21.3764  21
   6   0  -6 3283.42 113.880  21
   6   0  -5-11.8705 20.4127  21
  -6   0   4 1405.77 81.7352  18
   6   0  -3-14.8307 27.2051  19
   6   0  -2 1896.32 105.140  19
   6   0  -2 1653.40 98.5054  25
   6   0  -1-15.1402 32.7898  19
   6   0  -1-4.57013 26.2681   5
   6   0  -1-10.0616 29.3148  25
   6   0   0 11687.4 259.412  19
   6   0   0 12030.7 254.706   5
   6   0   0 11651.7 259.281  25
   6   0   1 14.3456 26.7109  19
   6   0   1 19.3632 27.8242  25
   6   0   1 18.3066 26.6687   5
   6   0   2 14787.0 285.927   5
   6   0   3-4.46803 23.8311   5
   6   0   4 433.519 50.3141   5
   6   0   5-4.12579 21.2840   5
   6   0   6 164.902 39.4208   5
   6   0   7 10.3099 21.3357   5
   6   0   8 896.454 53.5902   5
   6   0   9 4.69841 14.4099   5
   6   0  10 51.3439 14.1979   5
   6  -1 -10 13.2773 12.2127   6
   6   1  -9 363.806 32.5530   6
   6  -1  -9 297.634 30.9832   6
   6  -1  -9 315.630 30.1627  21
   6  -1  -8 127.216 25.2705  21
   6   1  -8 97.8436 23.7257   6
   6  -1  -8 44.3994 21.7921   6
   6  -1  -7 299.586 37.5455  21
   6  -1  -6 1434.53 76.1017  21
   6  -1  -5 711.979 57.2867  21
   6   1  -5 654.852 57.8356  19
  -6   1   5 582.120 54.1021  18
   6   1  -4 1019.92 73.2343  19
  -6   1   4 1041.61 71.9440  18
   6   1  -4 1015.23 72.4067  25
   6   1  -3 582.392 60.1604  19
  -6   1   3 779.218 64.6104  18
   6   1  -3 631.395 61.2690  25
   6   1  -2 144.709 36.4352  19
  -6   1   2 209.271 37.9050  18
   6   1  -2 177.052 39.1638  25
   6   1  -1 834.257 71.1108  19
   6   1  -1 836.650 65.9873   5
   6  -1  -1 841.659 67.1092   5
  -6   1   1 825.348 66.3768  18
   6   1  -1 852.990 71.0705  25
   6   1   0 3204.93 131.190  19
   6   1   0 2991.96 118.398   5
   6  -1   0 3188.99 126.337   5
   6   1   0 3306.05 131.688  25
   6   1   1 699.111 63.9756  19
   6   1   1 718.218 60.1786   5
   6  -1   1 876.335 66.2663   5
   6   1   1 696.761 62.9382  25
   6   1   2 131.096 33.8817  25
   6   1   2 120.487 32.4787   5
   6  -1   2 157.511 33.9653   5
   6   1   3 724.527 58.6446   5
   6  -1   3 690.601 61.4551   5
   6   1   4 687.787 57.3402   5
   6  -1   4 716.005 59.9551   5
   6   1   5 115.485 32.3775   5
   6  -1   5 142.453 33.3305   5
   6   1   6 268.898 37.6614   5
   6  -1   6 279.076 39.3129   5
   6   1   7 973.513 57.8554   5
   6  -1   7 932.654 59.4971   5
   6   1   8 20.9970 16.6801   5
   6  -1   8 48.7307 20.3667   5
   6  -1   9 86.3207 20.4267   5
   6  -1  10 90.0907 15.4596   5
   6  -2  -9 76.6892 18.6553  21
   6  -2  -8 51.9833 20.0790  21
   6  -2  -7 382.644 39.5722  21
   6  -2  -6 24.3494 22.6018  21
  -6   2   6 35.4466 20.9337  18
   6  -2  -5 188.620 35.0556  21
  -6   2   5 100.198 27.9745  18
   6  -2  -4 174.937 33.6597  21
   6   2  -4 162.575 36.2169  19
  -6   2   4 108.744 29.1937  18
   6   2  -3 137.876 34.9705  19
  -6   2   3 182.332 36.2968  18
   6   2  -3 155.387 35.8611  25
   6   2  -2 349.459 46.5981  19
  -6   2   2 232.223 38.0836  18
   6   2  -2 257.031 42.0593  25
   6   2  -1 311.447 46.4456  19
  -6   2   1 236.559 39.3159  18
   6   2  -1 317.056 46.0813  25
   6   2   0 1714.69 95.6159  19
   6  -2   0 1970.42 94.9376   5
  -6   2   0 1671.79 90.0408  18
   6   2   0 1802.57 97.8414  25
   6  -2   1 3.86573 22.5258  22
   6   2   1-14.1627 25.9793  19
   6   2   1 9.54547 25.4563  25
   6  -2   1 12.6001 24.1407   5
   6  -2   2 192.820 34.4788  22
   6   2   2 184.156 34.9765  19
   6   2   2 73.6923 28.2770  25
   6  -2   2 149.753 33.1231   5
   6  -2   3 3.79832 19.5947  22
   6   2   3-12.9818 24.1713  25
   6  -2   3-12.1790 22.3406   5
   6  -2   4 3.67717 20.2357  22
   6  -2   4-7.78714 20.0860   5
   6  -2   5 889.763 58.4532  22
   6  -2   5 907.449 59.8673   5
   6  -2   6 1108.61 62.2907  22
   6  -2   6 1253.41 66.9632   5
   6  -2   7 782.885 49.4434  22
   6  -2   7 815.782 50.9977   5
   6  -2   8 19.2188 16.2731   5
   6  -2   8-2.33865 15.5216  22
   6  -2   9-7.16933 11.8957   5
   6  -2   9 24.9388 12.4233  22
   6  -3  -8 190.086 23.4526  21
   6  -3  -7 59.5091 18.8632  21
  -6   3   7 86.9807 20.9477  18
   6  -3  -6 11.4560 17.9911  21
  -6   3   6 3.13414 16.9841  18
   6  -3  -5 180.066 28.7452  21
  -6   3   5 157.370 30.6788  18
   6  -3  -4 97.5879 29.1985  21
   6   3  -4 55.7091 27.1033  19
  -6   3   4 81.7709 28.6593  18
   6   3  -3 209.055 37.3006  19
  -6   3   3 269.603 38.5865  18
   6   3  -3 198.349 34.8022  25
   6  -3  -2 21.8677 20.9484  22
   6   3  -2 8.69889 23.5699  19
  -6   3   2-20.8449 21.8745  18
   6   3  -2-25.1742 28.1352  25
   6  -3  -1 257.698 36.3981  22
   6   3  -1 290.895 43.3721  19
  -6   3   1 323.052 40.9270  18
   6   3  -1 342.174 45.1370  25
   6  -3   0 52.8282 24.5218  22
   6   3   0 53.8564 29.7909  19
   6   3   0 71.3396 30.2065  25
   6  -3   1 60.1855 25.7363  22
   6   3   1 57.0423 30.3133  19
   6   3   1 17.6966 24.3490  25
   6  -3   2 181.219 31.1260  22
   6   3   2 208.493 35.7610  19
   6   3   2 153.869 33.7982  25
   6  -3   3 599.290 50.7265  22
   6   3   3 476.593 49.0419  25
   6  -3   4 1405.89 72.3550  22
   6  -3   5 25.2193 19.5723  22
   6  -3   6 256.041 30.9257  22
   6  -3   7 14.3719 14.8713  22
   6  -3   8 3.79249 11.6315  22
  -6   4   7 18.6145 11.6943  18
  -6   4   7 20.2031 14.1859  28
  -6   4   6 55.9771 18.3641  18
  -6   4   5 188.628 28.3655  18
  -6   4   4 704.159 50.3338  18
   6   4  -3 46.0907 22.7465  19
  -6   4   3 56.6841 22.1342  18
   6   4  -2 150.965 30.6374  19
  -6   4   2 166.205 29.0974  18
   6   4  -2 186.542 31.8660  25
   6  -4  -1 124.519 26.8336  22
   6   4  -1 143.127 31.8776  19
   6   4  -1 54.5311 24.8851  25
   6  -4   0 327.521 37.0379  22
   6   4   0 263.091 37.6834  19
   6   4   0 262.553 38.9401  25
   6  -4   1 75.0901 24.0264  22
   6   4   1 44.8176 24.7908  19
   6   4   1 26.1897 21.8049  25
   6  -4   2 3.16531 18.9363  22
   6   4   2 3.53061 21.9190  19
   6  -4   3-12.0241 19.3174  22
   6   4   3-3.19379 19.3503  19
   6  -4   4 724.021 47.7533  22
   6   4   4 667.669 49.0965  25
   6  -4   5 37.1101 18.0521  22
   6  -4   6 235.118 25.9863  22
   6  -4   7 655.345 35.5371  22
  -6   4  -7 640.116 34.0711  24
  -6   5   5 10.8565 11.3667  18
  -6   5   4 92.1077 18.9345  18
  -6   5   3 4.49059 12.5419  18
   6   5  -2 17.5503 17.6501  19
   6   5  -1-10.8699 20.3319  19
   6   5  -1-2.52769 16.6005  25
   6   5   0 217.960 29.8683  19
   6   5   0 228.361 29.6293  25
   6  -5   1 241.705 28.4024  22
   6   5   1 172.671 27.9608  19
   6   5   1 181.687 28.1490  25
   6  -5   2 319.333 30.1159  22
   6   5   2 299.060 32.4018  19
   6   5   2 292.024 31.9928  25
   6  -5   3 65.8504 17.0794  22
   6   5   3 60.2377 18.3920  19
   6   5   3 49.8626 18.6250  25
   6  -5   4 101.891 18.2228  22
   6   5   4 98.0373 18.8958  25
   7   0  -6 1.75959 12.6140  21
   7   0  -5 206.355 24.9440  21
   7   0  -4 2.53596 15.5555  21
  -7   0   4-10.8326 16.6117  18
  -7   0   3 18.3813 17.1131  18
  -7   0   2-6.58500 16.9853  18
  -7   0   1 384.465 40.5776  18
  -7   0   0 20.3378 18.9347  18
  -7   0  -1 358.606 38.2417  18
  -7   0  -2-9.02388 17.7628  18
   7   0   2 15.0402 17.9954   5
   7   0   3 184.176 27.8575   5
   7   0   4 2.59099 16.2760   5
   7   0   5 29.5522 17.0101   5
   7   0   6 7.50933 12.7168   5
   7  -1  -6 33.1214 13.8819  21
   7   1  -6 34.9692 14.6040   6
   7  -1  -6 20.7351 13.3942   6
   7  -1  -5 89.4001 18.9201  21
  -7   1   5 65.0166 17.0589  18
   7  -1  -4 922.980 51.8064  21
  -7   1   4 931.509 53.1334  18
   7  -1  -3 36.0318 18.5880  21
  -7   1   3 38.9007 19.0165  18
  -7  -1   3 22.9485 17.1632  18
  -7   1   2 528.156 45.3149  18
  -7  -1   2 502.453 44.0179  18
  -7   1   1 603.620 46.9115  18
  -7   1   0 1128.21 62.3507  18
  -7   1  -1 117.803 24.2301  18
   7  -1   2 1303.81 64.6849   5
   7   1   3 12.6799 15.7448   5
   7  -1   3 22.0105 18.0697   5
   7   1   4 616.395 40.7715   5
   7  -1   4 722.569 46.4450   5
   7   1   5 21.4741 14.1199   5
   7  -1   5 13.1726 14.8721   5
   7  -1   6 43.2197 14.7439   5
   7  -2  -5 102.959 19.1747  21
  -7   2   5 95.6818 18.0343  18
   7  -2  -4 81.1163 19.1411  21
  -7   2   4 50.0501 17.3964  18
   7  -2  -3 95.8160 21.9132  21
  -7   2   3 148.405 24.3710  18
   7  -2  -2 85.7501 23.6769  21
   7   2  -2 29.1516 20.9032  19
  -7   2   2 58.8005 20.7824  18
   7   2  -1 1105.08 62.2129  19
  -7   2   1 1149.33 59.5521  18
   7   2  -1 1249.74 64.0350  25
   7   2   0 1568.61 72.3121  19
  -7   2   0 1519.00 67.8066  18
   7   2   0 1684.24 75.2057  25
   7   2   1 1573.62 69.7439  19
   7   2   1 1461.89 68.2058  25
   7   2   2 892.759 52.7969  25
   7  -2   3 107.300 20.6520   5
   7  -2   4 36.6582 15.4883   5
   7  -2   5 300.750 26.0076   5
  -7   3   4-5.46349 11.7032  18
  -7   3   3-12.3169 13.3380  18
   7   3  -2-11.5062 15.4314  19
  -7   3   2 12.9489 13.0755  18
  -7   3   1 157.964 21.8837  18
   7   3  -1 154.336 23.4649  25
   7   3   0 9.75944 15.6791  19
   7   3   0 2.44198 14.6091  25
   7   3   1 59.9862 20.0169  19
   7   3   1 28.5442 16.2768  25
   7  -3   2 70.3861 15.4774  22
   7   3   2 87.3419 19.8547  25
   7  -3   3-1.65625 10.9925  22
   0   0   0    0.00    0.00   0

TITL UrAc_303K in P2(1)/n
REM P2(1)/n (#14 in standard setting)
CELL 1.54184   6.196311   7.451162  13.111377  90.0000  90.2818  90.0000
ZERR    4.00   0.000301   0.000449   0.000670   0.0000   0.0049   0.0000
LATT  1
SYMM -x+1/2, y+1/2,-z+1/2
SFAC C H N O
UNIT 20.00 16.00 16.00 12.00
TREF
HKLF 4
END
;
_shelx_hkl_checksum                84621
_olex2_submission_special_instructions  'No special instructions were received'
_oxdiff_exptl_absorpt_empirical_details
;
Empirical correction (ABSPACK) includes:
- Absorption correction using spherical harmonics
- Frame scaling
;
_oxdiff_exptl_absorpt_empirical_full_max  1.113
_oxdiff_exptl_absorpt_empirical_full_min  0.882
loop_
  _twin_individual_id
  _twin_individual_mass_fraction_refined
 1 0.8987(18)
 2 0.1013(18)
