# Supplementary material
Source: MDPI journal article supplement (https://www.mdpi.com/2075-163X/9/6/373)
Supplement: s1 [file s1 › UA_+60_last.cif]

data_UA_+60_urac_333k
_audit_creation_date               2019-04-29
_audit_creation_method
;
Olex2 1.2
(compiled 2018.05.29 svn.r3508 for OlexSys, GUI svn.r5506)
;
_shelx_SHELXL_version_number       '2018/3'
_audit_contact_author_address      ?
_audit_contact_author_email        ?
_audit_contact_author_name         ''
_audit_contact_author_phone        ?
_publ_contact_author_id_orcid      ?
_publ_section_references
;
Dolomanov, O.V., Bourhis, L.J., Gildea, R.J, Howard, J.A.K. & Puschmann, H.
 (2009), J. Appl. Cryst. 42, 339-341.

Sheldrick, G.M. (2015). Acta Cryst. C71, 3-8.
;
_chemical_name_common              ?
_chemical_name_systematic          ?
_chemical_formula_moiety           'C5 H4 N4 O3'
_chemical_formula_sum              'C5 H4 N4 O3'
_chemical_formula_weight           168.12
_chemical_melting_point            ?
_chemical_oxdiff_formula           'C5 H4 N4 O3'
loop_
  _atom_type_symbol
  _atom_type_description
  _atom_type_scat_dispersion_real
  _atom_type_scat_dispersion_imag
  _atom_type_scat_source
 'C' 'C' 0.0181 0.0091 'International Tables Vol C Tables 4.2.6.8 and 6.1.1.4'
 'H' 'H' 0.0000 0.0000 'International Tables Vol C Tables 4.2.6.8 and 6.1.1.4'
 'N' 'N' 0.0311 0.0180 'International Tables Vol C Tables 4.2.6.8 and 6.1.1.4'
 'O' 'O' 0.0492 0.0322 'International Tables Vol C Tables 4.2.6.8 and 6.1.1.4'

_shelx_space_group_comment
;
The symmetry employed for this shelxl refinement is uniquely defined
by the following loop, which should always be used as a source of
symmetry information in preference to the above space-group names.
They are only intended as comments.
;
_space_group_crystal_system        'monoclinic'
_space_group_IT_number             14
_space_group_name_H-M_alt          'P 1 21/n 1'
_space_group_name_Hall             '-P 2yn'
loop_
  _space_group_symop_operation_xyz
 'x, y, z'
 '-x+1/2, y+1/2, -z+1/2'
 '-x, -y, -z'
 'x-1/2, -y-1/2, z-1/2'

_cell_length_a                     6.1898(3)
_cell_length_b                     7.4857(4)
_cell_length_c                     13.1103(5)
_cell_angle_alpha                  90
_cell_angle_beta                   90.217(4)
_cell_angle_gamma                  90
_cell_volume                       607.46(5)
_cell_formula_units_Z              4
_cell_measurement_reflns_used      1254
_cell_measurement_temperature      333(2)
_cell_measurement_theta_max        72.3640
_cell_measurement_theta_min        6.7400
_shelx_estimated_absorpt_T_max     ?
_shelx_estimated_absorpt_T_min     ?
_exptl_absorpt_coefficient_mu      1.354
_exptl_absorpt_correction_T_max    1.00000
_exptl_absorpt_correction_T_min    0.98835
_exptl_absorpt_correction_type     multi-scan
_exptl_absorpt_process_details
;
CrysAlisPro 1.171.39.44a (Rigaku Oxford Diffraction, 2018)
Empirical absorption correction using spherical harmonics,
 implemented in SCALE3 ABSPACK scaling algorithm.
;
_exptl_absorpt_special_details     ?
_exptl_crystal_colour              'translucent light-yellow'
_exptl_crystal_density_diffrn      1.838
_exptl_crystal_density_meas        ?
_exptl_crystal_density_method      ?
_exptl_crystal_description         'prism'
_exptl_crystal_F_000               344
_exptl_crystal_size_max            0.075
_exptl_crystal_size_mid            0.07
_exptl_crystal_size_min            0.027
_exptl_transmission_factor_max     ?
_exptl_transmission_factor_min     ?
_diffrn_reflns_av_R_equivalents    0.0185
_diffrn_reflns_av_unetI/netI       0.0270
_diffrn_reflns_Laue_measured_fraction_full  0.985
_diffrn_reflns_Laue_measured_fraction_max  0.983
_diffrn_reflns_limit_h_max         7
_diffrn_reflns_limit_h_min         -7
_diffrn_reflns_limit_k_max         9
_diffrn_reflns_limit_k_min         -6
_diffrn_reflns_limit_l_max         15
_diffrn_reflns_limit_l_min         -15
_diffrn_reflns_number              2639
_diffrn_reflns_point_group_measured_fraction_full  0.985
_diffrn_reflns_point_group_measured_fraction_max  0.983
_diffrn_reflns_theta_full          67.684
_diffrn_reflns_theta_max           69.945
_diffrn_reflns_theta_min           3.371
_diffrn_ambient_environment        air
_diffrn_ambient_temperature        333(2)
_diffrn_detector                   'CCD plate'
_diffrn_detector_area_resol_mean   ?
_diffrn_detector_type              HyPix3000
_diffrn_measured_fraction_theta_full  0.985
_diffrn_measured_fraction_theta_max  0.983
_diffrn_measurement_details
;
List of Runs (angles in degrees, time in seconds):

  # Type    Start    End  Width  t~exp~   \w     \q     \k     \f   Frames
--------------------------------------------------------------------------
  1  \w   -100.00 -73.00   0.50    1.00    --  -38.95 -55.00 -24.00   54
  2  \w    -54.00 -16.00   0.50    1.00    --  -38.95  55.00 119.00   76
  3  \w    -65.00 -30.00   0.50    1.00    --  -38.95 -55.00 -24.00   70
  4  \w     24.00  54.00   0.50    1.00    --   38.95  55.00 119.00   60
  5  \w     89.00 153.00   0.50    2.50    --  107.00  55.00 119.00  128
  6  \w     45.00 127.00   0.50    2.50    --  107.00 -55.00 -24.00  164
  7  \w    -62.00   4.00   0.50    1.00    --  -38.95  77.00-150.00  132
  8  \w    -52.00 -14.00   0.50    1.00    --  -38.95  43.00 150.00   76
  9  \w   -102.00 -42.00   0.50    1.00    --  -38.95 -65.00 -60.00  120
 10  \w    -10.00  21.00   0.50    1.00    --  -38.95  43.00 150.00   62
 11  \w     68.00 106.00   0.50    1.00    --   38.95  21.00  90.00   76
 12  \w    -18.00  11.00   0.50    1.00    --   38.95 -32.00 -30.00   58
 13  \w     29.00  63.00   0.50    1.00    --   38.95  21.00  90.00   68
 14  \w    -26.00   0.00   0.50    1.00    --   38.95 -55.00 -24.00   52
 15  \w     16.00  48.00   0.50    1.00    --   38.95 -32.00 -30.00   64
 16  \w    -21.00  21.00   0.50    1.00    --   38.95 -32.00 150.00   84
 17  \w     34.00  63.00   0.50    1.00    --   38.95  43.00 -90.00   58
 18  \w     89.00 155.00   0.50    2.50    --  107.00  45.00   0.00  132
 19  \w     78.00 129.00   0.50    2.50    --  107.00 -61.00-150.00  102
 20  \w     68.00 114.00   0.50    2.50    --  107.00-133.00-150.00   92
 21  \w     41.00 120.00   0.50    2.50    --  107.00 -30.00 -60.00  158
 22  \w     93.00 127.00   0.50    2.50    --  107.00  30.00-180.00   68
 23  \w     99.00 153.00   0.50    2.50    --  107.00  45.00  90.00  108
 24  \w     55.00 122.00   0.50    2.50    --  107.00 -37.00  90.00  134
 25  \w     97.00 122.00   0.50    2.50    --  107.00 -53.00-150.00   50
 26  \w     99.00 125.00   0.50    2.50    --  107.00-133.00 -60.00   52
 27  \w     59.00  84.00   0.50    2.50    --  107.00 -53.00-150.00   50
 28  \w    120.00 155.00   0.50    2.50    --  107.00  30.00  30.00   70
 29  \w     44.00  92.00   0.50    2.50    --  107.00-133.00 -60.00   96
 30  \w    107.00 142.00   0.50    2.50    --  107.00  15.00  90.00   70
 31  \w     72.00 115.00   0.50    2.50    --  107.00 -37.00 150.00   86
;
_diffrn_measurement_device         'four-circle diffractometer'
_diffrn_measurement_device_type   
 'SuperNova, Single source at offset/far, HyPix3000'
_diffrn_measurement_method         '\w scans'
_diffrn_orient_matrix_type        
 'CrysAlisPro convention (1999,Acta A55,543-557)'
_diffrn_orient_matrix_UB_11        0.2146694000
_diffrn_orient_matrix_UB_12        -0.0989883000
_diffrn_orient_matrix_UB_13        -0.0180229000
_diffrn_orient_matrix_UB_21        -0.0977512000
_diffrn_orient_matrix_UB_22        -0.0906829000
_diffrn_orient_matrix_UB_23        -0.0951240000
_diffrn_orient_matrix_UB_31        0.0797912000
_diffrn_orient_matrix_UB_32        0.1558943000
_diffrn_orient_matrix_UB_33        -0.0665668000
_diffrn_radiation_monochromator    mirror
_diffrn_radiation_probe            x-ray
_diffrn_radiation_type             CuK\a
_diffrn_radiation_wavelength       1.54184
_diffrn_source                     'micro-focus sealed X-ray tube'
_diffrn_source_type                'SuperNova (Cu) X-ray Source'
_reflns_Friedel_coverage           0.000
_reflns_Friedel_fraction_full      .
_reflns_Friedel_fraction_max       .
_reflns_number_gt                  1020
_reflns_number_total               1131
_reflns_odcompleteness_completeness  98.08
_reflns_odcompleteness_iscentric   1
_reflns_odcompleteness_theta       72.42
_reflns_special_details
;
 Reflections were merged by SHELXL according to the crystal
 class for the calculation of statistics and refinement.
 
 _reflns_Friedel_fraction is defined as the number of unique
 Friedel pairs measured divided by the number that would be
 possible theoretically, ignoring centric projections and
 systematic absences. Completness statistics refer to single and
 composite reflections containing twin component 1 only.
;
_reflns_threshold_expression       'I > 2\s(I)'
_computing_cell_refinement         'CrysAlisPro 1.171.39.44a (Rigaku OD, 2018)'
_computing_data_collection         'CrysAlisPro 1.171.39.44a (Rigaku OD, 2018)'
_computing_data_reduction          'CrysAlisPro 1.171.39.44a (Rigaku OD, 2018)'
_computing_molecular_graphics      'Olex2 (Dolomanov et al., 2009)'
_computing_publication_material    'Olex2 (Dolomanov et al., 2009)'
_computing_structure_refinement    'ShelXL (Sheldrick, 2015)'
_computing_structure_solution      'ShelXT (Sheldrick, 2015)'
_refine_diff_density_max           0.198
_refine_diff_density_min           -0.166
_refine_diff_density_rms           0.041
_refine_ls_extinction_coef         0.0029(3)
_refine_ls_extinction_expression  
 'Fc^*^=kFc[1+0.001xFc^2^\l^3^/sin(2\q)]^-1/4^'
_refine_ls_extinction_method       'SHELXL-2018/3 (Sheldrick 2018)'
_refine_ls_goodness_of_fit_ref     1.066
_refine_ls_hydrogen_treatment      constr
_refine_ls_matrix_type             full
_refine_ls_number_parameters       111
_refine_ls_number_reflns           1131
_refine_ls_number_restraints       0
_refine_ls_R_factor_all            0.0408
_refine_ls_R_factor_gt             0.0365
_refine_ls_restrained_S_all        1.066
_refine_ls_shift/su_max            0.000
_refine_ls_shift/su_mean           0.000
_refine_ls_structure_factor_coef   Fsqd
_refine_ls_weighting_details      
 'w=1/[\s^2^(Fo^2^)+(0.0491P)^2^+0.1207P] where P=(Fo^2^+2Fc^2^)/3'
_refine_ls_weighting_scheme        calc
_refine_ls_wR_factor_gt            0.0948
_refine_ls_wR_factor_ref           0.0989
_refine_special_details
;
 Refined as a 2-component twin.
;
_olex2_refinement_description
;
1. Twinned data refinement
 Scales: 0.8877(16)
 0.1123(16)
2. Fixed Uiso
 At 1.2 times of:
  All N(H) groups
3.a Aromatic/amide H refined with riding coordinates:
 N1(H1), N2(H2), N3(H3), N4(H4)
;
_atom_sites_solution_hydrogens     geom
_atom_sites_solution_primary       ?
_atom_sites_solution_secondary     ?
loop_
  _atom_site_label
  _atom_site_type_symbol
  _atom_site_fract_x
  _atom_site_fract_y
  _atom_site_fract_z
  _atom_site_U_iso_or_equiv
  _atom_site_adp_type
  _atom_site_occupancy
  _atom_site_site_symmetry_order
  _atom_site_calc_flag
  _atom_site_refinement_flags_posn
  _atom_site_refinement_flags_adp
  _atom_site_refinement_flags_occupancy
  _atom_site_disorder_assembly
  _atom_site_disorder_group
 O1 O 0.9238(3) 0.4833(2) 0.36810(12) 0.0525(5) Uani 1 1 d . . . . .
 O2 O 0.5827(3) 0.7702(2) 0.63007(11) 0.0471(4) Uani 1 1 d . . . . .
 O3 O -0.0283(2) 0.9664(2) 0.35942(11) 0.0444(4) Uani 1 1 d . . . . .
 N1 N 0.7527(3) 0.6350(2) 0.49469(12) 0.0389(4) Uani 1 1 d . . . . .
 H1 H 0.856711 0.606152 0.535147 0.047 Uiso 1 1 calc R . . . .
 N2 N 0.6133(3) 0.6323(2) 0.32944(13) 0.0392(4) Uani 1 1 d . . . . .
 H2 H 0.617595 0.602745 0.266087 0.047 Uiso 1 1 calc R . . . .
 N3 N 0.2368(3) 0.8768(2) 0.47462(13) 0.0372(4) Uani 1 1 d . . . . .
 H3 H 0.185993 0.920204 0.530314 0.045 Uiso 1 1 calc R . . . .
 N4 N 0.2741(3) 0.7984(2) 0.31388(13) 0.0368(4) Uani 1 1 d . . . . .
 H4 H 0.249609 0.784777 0.249738 0.044 Uiso 1 1 calc R . . . .
 C1 C 0.7732(3) 0.5776(3) 0.39595(16) 0.0402(5) Uani 1 1 d . . . . .
 C2 C 0.4489(3) 0.7336(3) 0.36587(15) 0.0343(4) Uani 1 1 d . . . . .
 C3 C 0.4274(3) 0.7825(3) 0.46489(15) 0.0355(5) Uani 1 1 d . . . . .
 C4 C 0.5858(3) 0.7339(3) 0.53850(16) 0.0367(5) Uani 1 1 d . . . . .
 C5 C 0.1438(3) 0.8889(3) 0.38106(15) 0.0364(5) Uani 1 1 d . . . . .

loop_
  _atom_site_aniso_label
  _atom_site_aniso_U_11
  _atom_site_aniso_U_22
  _atom_site_aniso_U_33
  _atom_site_aniso_U_23
  _atom_site_aniso_U_13
  _atom_site_aniso_U_12
 O1 0.0464(9) 0.0700(11) 0.0411(9) -0.0029(8) -0.0081(7) 0.0159(8)
 O2 0.0545(9) 0.0628(10) 0.0240(7) 0.0005(7) -0.0099(7) 0.0018(8)
 O3 0.0403(8) 0.0617(10) 0.0313(7) 0.0014(7) -0.0062(6) 0.0097(7)
 N1 0.0360(9) 0.0487(11) 0.0319(8) 0.0028(7) -0.0108(7) 0.0026(8)
 N2 0.0407(9) 0.0493(10) 0.0277(8) -0.0028(7) -0.0092(7) 0.0035(8)
 N3 0.0376(9) 0.0473(10) 0.0267(8) -0.0014(7) -0.0041(7) 0.0022(8)
 N4 0.0377(9) 0.0494(10) 0.0232(8) -0.0019(7) -0.0063(7) 0.0042(8)
 C1 0.0374(10) 0.0472(12) 0.0359(10) 0.0032(9) -0.0086(9) -0.0003(10)
 C2 0.0366(10) 0.0393(11) 0.0268(9) -0.0001(8) -0.0075(8) -0.0018(8)
 C3 0.0367(10) 0.0414(11) 0.0285(9) 0.0009(8) -0.0068(8) 0.0007(9)
 C4 0.0394(10) 0.0412(11) 0.0294(10) 0.0033(8) -0.0081(9) -0.0038(9)
 C5 0.0395(10) 0.0426(12) 0.0270(9) 0.0006(8) -0.0051(8) -0.0017(9)

_geom_special_details
;
 All esds (except the esd in the dihedral angle between two l.s. planes)
 are estimated using the full covariance matrix.  The cell esds are taken
 into account individually in the estimation of esds in distances, angles
 and torsion angles; correlations between esds in cell parameters are only
 used when they are defined by crystal symmetry.  An approximate (isotropic)
 treatment of cell esds is used for estimating esds involving l.s. planes.
;
loop_
  _geom_bond_atom_site_label_1
  _geom_bond_atom_site_label_2
  _geom_bond_distance
  _geom_bond_site_symmetry_2
  _geom_bond_publ_flag
 O1 C1 1.226(3) . ?
 O2 C4 1.231(3) . ?
 O3 C5 1.245(2) . ?
 N1 H1 0.8600 . ?
 N1 C1 1.370(3) . ?
 N1 C4 1.396(3) . ?
 N2 H2 0.8600 . ?
 N2 C1 1.379(3) . ?
 N2 C2 1.357(3) . ?
 N3 H3 0.8600 . ?
 N3 C3 1.381(3) . ?
 N3 C5 1.356(3) . ?
 N4 H4 0.8600 . ?
 N4 C2 1.365(3) . ?
 N4 C5 1.375(3) . ?
 C2 C3 1.356(3) . ?
 C3 C4 1.421(3) . ?

loop_
  _geom_angle_atom_site_label_1
  _geom_angle_atom_site_label_2
  _geom_angle_atom_site_label_3
  _geom_angle
  _geom_angle_site_symmetry_1
  _geom_angle_site_symmetry_3
  _geom_angle_publ_flag
 C1 N1 H1 115.6 . . ?
 C1 N1 C4 128.76(17) . . ?
 C4 N1 H1 115.6 . . ?
 C1 N2 H2 120.6 . . ?
 C2 N2 H2 120.6 . . ?
 C2 N2 C1 118.73(17) . . ?
 C3 N3 H3 126.0 . . ?
 C5 N3 H3 126.0 . . ?
 C5 N3 C3 108.10(17) . . ?
 C2 N4 H4 125.6 . . ?
 C2 N4 C5 108.72(16) . . ?
 C5 N4 H4 125.6 . . ?
 O1 C1 N1 122.34(19) . . ?
 O1 C1 N2 121.8(2) . . ?
 N1 C1 N2 115.83(19) . . ?
 N2 C2 N4 128.05(17) . . ?
 C3 C2 N2 124.34(18) . . ?
 C3 C2 N4 107.56(18) . . ?
 N3 C3 C4 131.0(2) . . ?
 C2 C3 N3 108.26(17) . . ?
 C2 C3 C4 120.8(2) . . ?
 O2 C4 N1 122.17(19) . . ?
 O2 C4 C3 126.3(2) . . ?
 N1 C4 C3 111.48(18) . . ?
 O3 C5 N3 126.7(2) . . ?
 O3 C5 N4 125.96(18) . . ?
 N3 C5 N4 107.35(17) . . ?

loop_
  _geom_hbond_atom_site_label_D
  _geom_hbond_atom_site_label_H
  _geom_hbond_atom_site_label_A
  _geom_hbond_distance_DH
  _geom_hbond_distance_HA
  _geom_hbond_distance_DA
  _geom_hbond_angle_DHA
  _geom_hbond_site_symmetry_A
  _geom_hbond_publ_flag
 N1 H1 O1 0.86 1.97 2.829(2) 173.7 3_766 yes
 N2 H2 O3 0.86 2.01 2.818(2) 155.6 2_545 yes
 N3 H3 O3 0.86 1.94 2.793(2) 169.6 3_576 yes
 N4 H4 O2 0.86 1.92 2.730(2) 156.5 4_575 yes


loop_
  _geom_torsion_atom_site_label_1
  _geom_torsion_atom_site_label_2
  _geom_torsion_atom_site_label_3
  _geom_torsion_atom_site_label_4
  _geom_torsion
  _geom_torsion_site_symmetry_1
  _geom_torsion_site_symmetry_2
  _geom_torsion_site_symmetry_3
  _geom_torsion_site_symmetry_4
  _geom_torsion_publ_flag
 N2 C2 C3 N3 -177.06(19) . . . . ?
 N2 C2 C3 C4 2.3(3) . . . . ?
 N3 C3 C4 O2 -0.5(4) . . . . ?
 N3 C3 C4 N1 179.0(2) . . . . ?
 N4 C2 C3 N3 0.6(2) . . . . ?
 N4 C2 C3 C4 179.96(19) . . . . ?
 C1 N1 C4 O2 176.7(2) . . . . ?
 C1 N1 C4 C3 -2.9(3) . . . . ?
 C1 N2 C2 N4 -178.7(2) . . . . ?
 C1 N2 C2 C3 -1.5(3) . . . . ?
 C2 N2 C1 O1 178.7(2) . . . . ?
 C2 N2 C1 N1 -1.2(3) . . . . ?
 C2 N4 C5 O3 179.4(2) . . . . ?
 C2 N4 C5 N3 -1.1(2) . . . . ?
 C2 C3 C4 O2 -179.7(2) . . . . ?
 C2 C3 C4 N1 -0.2(3) . . . . ?
 C3 N3 C5 O3 -179.0(2) . . . . ?
 C3 N3 C5 N4 1.5(2) . . . . ?
 C4 N1 C1 O1 -176.2(2) . . . . ?
 C4 N1 C1 N2 3.6(3) . . . . ?
 C5 N3 C3 C2 -1.3(2) . . . . ?
 C5 N3 C3 C4 179.4(2) . . . . ?
 C5 N4 C2 N2 177.9(2) . . . . ?
 C5 N4 C2 C3 0.3(2) . . . . ?

_shelx_res_file
;
TITL urac_333k_a.res in P2(1)/n
    urac_333k.res
    created by SHELXL-2018/3 at 23:08:58 on 29-Apr-2019
REM Old TITL UrAc_333K in P2(1)/n
REM SHELXT solution in P2(1)/n: R1 0.196, Rweak 0.089, Alpha 0.081
REM <I/s> 0.417 for 102 systematic absences, Orientation as input
REM Formula found by SHELXT: C9 O3
CELL 1.54184 6.189767 7.485723 13.110329 90 90.2166 90
ZERR 4 0.000271 0.000389 0.000549 0 0.0043 0
LATT 1
SYMM 0.5-X,0.5+Y,0.5-Z
SFAC C H N O
UNIT 20 16 16 12

L.S. 20
PLAN  20
BOND $H
Htab
conf
list 4
fmap 2
acta
TWIN 1 0 0 0 -1 0 0 0 -1 2
OMIT -4 140
OMIT 1 2 2
OMIT -1 2 4
OMIT -1 2 6
OMIT 1 0 5
REM <olex2.extras>
REM <HklSrc "%.\\UrAc_333K.hkl">
REM </olex2.extras>

WGHT    0.049100    0.120700
EXTI    0.002852
BASF   0.11228
FVAR       3.96324
O1    4    0.923766    0.483273    0.368103    11.00000    0.04642    0.06999 =
         0.04112   -0.00289   -0.00814    0.01595
O2    4    0.582716    0.770198    0.630067    11.00000    0.05449    0.06279 =
         0.02404    0.00047   -0.00993    0.00181
O3    4   -0.028311    0.966369    0.359425    11.00000    0.04029    0.06170 =
         0.03131    0.00137   -0.00625    0.00970
N1    3    0.752724    0.634971    0.494689    11.00000    0.03604    0.04868 =
         0.03188    0.00278   -0.01082    0.00257
AFIX  43
H1    2    0.856711    0.606152    0.535147    11.00000   -1.20000
AFIX   0
N2    3    0.613263    0.632268    0.329441    11.00000    0.04071    0.04929 =
         0.02767   -0.00278   -0.00918    0.00348
AFIX  43
H2    2    0.617595    0.602745    0.266087    11.00000   -1.20000
AFIX   0
N3    3    0.236837    0.876772    0.474622    11.00000    0.03756    0.04735 =
         0.02670   -0.00145   -0.00414    0.00223
AFIX  43
H3    2    0.185993    0.920204    0.530314    11.00000   -1.20000
AFIX   0
N4    3    0.274137    0.798358    0.313882    11.00000    0.03767    0.04942 =
         0.02316   -0.00186   -0.00628    0.00424
AFIX  43
H4    2    0.249609    0.784777    0.249738    11.00000   -1.20000
AFIX   0
C1    1    0.773187    0.577598    0.395950    11.00000    0.03743    0.04718 =
         0.03587    0.00321   -0.00861   -0.00031
C2    1    0.448880    0.733559    0.365866    11.00000    0.03657    0.03933 =
         0.02680   -0.00015   -0.00755   -0.00181
C3    1    0.427413    0.782492    0.464894    11.00000    0.03665    0.04144 =
         0.02850    0.00085   -0.00678    0.00067
C4    1    0.585836    0.733918    0.538505    11.00000    0.03938    0.04120 =
         0.02945    0.00334   -0.00810   -0.00379
C5    1    0.143829    0.888941    0.381061    11.00000    0.03955    0.04256 =
         0.02697    0.00062   -0.00513   -0.00175
HKLF 4


REM  urac_333k_a.res in P2(1)/n
REM wR2 = 0.0989, GooF = S = 1.066, Restrained GooF = 1.066 for all data
REM R1 = 0.0365 for 1020 Fo > 4sig(Fo) and 0.0408 for all 1131 data
REM 111 parameters refined using 0 restraints

END

WGHT      0.0491      0.1207

REM Instructions for potential hydrogen bonds
EQIV $1 -x+2, -y+1, -z+1
HTAB N1 O1_$1
EQIV $2 -x+1/2, y-1/2, -z+1/2
HTAB N2 O3_$2
EQIV $3 -x, -y+2, -z+1
HTAB N3 O3_$3
EQIV $4 x-1/2, -y+3/2, z-1/2
HTAB N4 O2_$4

REM Highest difference peak  0.198,  deepest hole -0.166,  1-sigma level  0.041
Q1    1   0.4560  0.7792  0.5226  11.00000  0.05    0.20
Q2    1   0.4500  0.8378  0.6330  11.00000  0.05    0.19
Q3    1   0.5736  0.7272  0.4611  11.00000  0.05    0.14
Q4    1   0.9412  0.5284  0.5384  11.00000  0.05    0.13
Q5    1   0.7543  0.7417  0.6138  11.00000  0.05    0.13
Q6    1   0.1890  0.8670  0.6196  11.00000  0.05    0.12
Q7    1   0.9255  0.4900  0.2992  11.00000  0.05    0.12
Q8    1  -0.2455  1.0408  0.3357  11.00000  0.05    0.11
Q9    1   0.2752  0.8565  0.6022  11.00000  0.05    0.11
Q10   1   0.6130  0.5153  0.2771  11.00000  0.05    0.11
Q11   1   0.4236  0.7239  0.4346  11.00000  0.05    0.11
Q12   1   0.2372  1.0365  0.5164  11.00000  0.05    0.10
Q13   1   0.2656  0.7414  0.1753  11.00000  0.05    0.10
Q14   1   0.8084  0.8835  0.6559  11.00000  0.05    0.10
Q15   1   1.0026  0.3676  0.3852  11.00000  0.05    0.10
Q16   1   0.7205  0.3771  0.3559  11.00000  0.05    0.10
Q17   1   0.4110  0.7894  0.3265  11.00000  0.05    0.10
Q18   1   0.2458  1.0267  0.5948  11.00000  0.05    0.10
Q19   1   0.1979  0.7209  0.2381  11.00000  0.05    0.10
Q20   1   0.9408  0.5425  0.4580  11.00000  0.05    0.10
;
_shelx_res_checksum                48787
_shelx_hkl_file
;
   0   0  -1 2.08829 5.51103  15
   0   0   1 5.09797 4.74813  13
   0   0  -2 36905.9 475.267  15
   0   0  -2 36510.2 479.840   8
   0   0  -3 8.52609 16.5094  15
   0   0  -3 2.31996 17.1455   8
   0   0   4 59797.9 790.470  11
   0   0  -4 59303.9 807.482   8
   0   0  -5 4.16162 20.0796   8
   0   0   5 10.8169 17.0592  11
   0   0   6 64273.0 906.942  11
   0   0   6 65185.8 936.073   4
   0   0  -6 64104.9 932.645   8
   0   0  -7-6.48152 22.1132   2
   0   0  -7-6.48781 22.1347   8
   0   0   7-6.59562 21.6197   4
   0   0  -8 32516.1 611.041   2
   0   0  -8 31956.6 613.147   8
   0   0   8 31514.3 611.888   4
   0   0   9 28.9142 31.5934   4
   0   0  -9 18.8401 26.7420   2
   0   0  -9 18.8590 28.2168   8
   0   0 -10 1308.66 122.451   2
   0   0 -10 1410.90 127.937   8
   0   0 -10 1461.53 82.5456   6
   0   0  10 1462.98 129.704   4
   0   0 -11-18.6221 28.8880   6
   0   0 -12 7202.42 198.392   6
   0   0 -13-13.5999 23.8839   6
   0   0 -14 686.560 55.3155   6
   0   0 -15-2.97891 20.1301   6
   0   0 -16 467.359 33.9635   6
   0  -1   0 3.83743 4.52251   9
   0   1   0 3.67470 5.58897  13
   0   1   0 9.09912 8.80959  16
   0   1  -1 342.207 18.9874  16
   0   1  -1 373.554 18.5875  10
   0   1  -1 347.109 23.3239   7
   0  -1  -1 370.685 20.9756  15
   0   1   1 354.947 22.8370  13
   0  -1  -1 392.762 21.8221   9
   0  -1  -1 350.923 19.4348   8
   0   1   2 38042.7 505.367  13
   0   1  -2 37828.1 504.957   7
   0  -1   2 37555.9 461.209  11
   0  -1  -2 37906.5 496.060   8
   0   1  -2 37457.7 492.323  10
   0  -1  -2 38075.9 502.592   9
   0  -1  -2 37561.3 499.606  15
   0  -1  -2 38465.4 502.871  17
   0   1  -3 391.089 34.1265   7
   0  -1  -3 359.684 34.7695  15
   0  -1  -3 398.326 34.3643   8
   0  -1  -3 363.335 32.5111  17
   0  -1  -4 6764.65 165.863   8
   0  -1  -4 6738.74 166.201  15
   0   1  -4 7090.15 168.326   8
   0   1   4 6554.39 167.378  11
   0   1   5 129.609 28.8120   4
   0   1  -5 67.0059 25.0747   8
   0   1   5 74.3429 24.1412  11
   0  -1   5 34.5081 20.8270   4
   0  -1  -5 64.1647 24.9638   8
   0  -1  -6 4176.95 153.548   8
   0  -1  -6 4010.13 148.092   2
   0   1  -6 4107.28 150.722   8
   0   1   6 4197.24 154.191  11
   0  -1   6 4042.73 151.279   4
   0   1   6 3979.32 148.361   4
   0   1  -7 6.59770 20.7057   2
   0  -1  -7-13.2708 27.3682   8
   0   1   7 6.53241 22.2867  11
   0   1  -7 6.51246 26.1446   8
   0  -1   7 6.75671 21.2047   4
   0   1   7-13.1460 22.4251   4
   0  -1  -7 6.47010 20.3053   2
   0   1   8 2367.38 139.515   4
   0  -1  -8 2209.40 133.521   2
   0  -1  -8 2391.79 140.400   8
   0   1   8 2524.52 141.112  11
   0   1  -8 2487.63 140.591   8
   0  -1   8 2298.47 136.982   4
   0   1  -8 2136.92 134.543   2
   0   1  -9 562.658 75.6570   2
   0  -1  -9 412.734 64.8028   2
   0  -1  -9 432.036 67.5503   8
   0   1  -9 394.731 64.3147   8
   0   1   9 338.023 60.7089  11
   0  -1   9 420.634 66.2832   4
   0   1   9 469.190 70.3522   4
   0  -1 -10 161.117 32.8340  21
   0  -1  10 181.940 51.6329   4
   0   1 -10 153.085 48.5628   8
   0  -1 -10 152.040 32.7583   6
   0   1 -10 129.153 32.3816   6
   0  -1 -10 120.013 46.2028   2
   0   1  10 122.546 47.1765   4
   0   1 -10 310.365 63.8238   2
   0  -1 -10 145.268 48.4868   8
   0  -1 -11 1804.55 91.0137  21
   0  -1 -11 1974.56 96.9039   6
   0   1 -11 1782.35 95.4007   6
   0   1 -12 2800.06 119.730   6
   0  -1 -12 2877.63 120.128   6
   0  -1 -12 2743.01 113.677  21
   0   1 -13 342.454 44.8842   6
   0  -1 -13 312.337 42.2200   6
   0  -1 -13 302.682 40.2020  21
   0   1 -14 363.353 42.5446   6
   0  -1 -14 301.159 38.2565   6
   0  -1 -15 10.9426 17.9342   6
   0   1  15 14.5891 18.5211  23
   0   1 -15-8.55384 22.4113   6
   0   1 -16 7.06279 13.9798   6
   0  -1 -16-26.0478 15.4056   6
   0   2   0 18038.2 288.707  16
   0   2   0 18251.1 290.259   7
   0   2  -1 210.382 24.6721  16
   0   2  -1 230.668 28.2840   7
   0  -2  -2 3064.50 89.3973   9
   0   2  -2 3093.83 83.0674  16
   0   2  -2 3213.28 100.462   7
   0  -2  -2 3158.18 102.808  17
   0  -2  -2 3018.68 86.8073  15
   0  -2  -3 2148.14 90.2733  17
   0   2  -3 2306.73 91.2893   7
   0  -2  -3 2414.51 87.8277  15
   0   2   3 2369.35 95.7388  11
   0   2   4 11360.8 251.378  11
   0   2  -4 11002.5 245.111   7
   0  -2  -4 11117.6 243.124  17
   0   2  -5 2440.23 106.297   2
   0  -2  -5 2512.59 109.341   8
   0   2   5 2472.63 116.470  11
   0   2   6 2304.23 123.807  11
   0   2  -6 2199.88 113.504   2
   0  -2  -6 2189.29 114.574   8
   0  -2  -7 994.888 86.6888   8
   0   2  -7 1148.07 88.2699   2
   0   2   7 1023.27 90.7758  11
   0   2   8 2307.58 146.113  11
   0   2   9 2355.65 159.078  11
   0  -2  -9 2531.58 103.189  21
   0  -2 -10 98.7873 30.7059  21
   0   2  10 105.115 46.9020  11
   0  -2 -11 1977.76 97.0833  21
   0   2 -11 2084.85 100.355   6
   0  -2 -12 834.095 65.7231  21
   0   2 -12 878.258 66.1643   6
   0   2 -13 141.272 32.6914   6
   0  -2 -13 201.810 33.5819  21
   0  -2 -14 910.973 59.0598  21
   0   2 -14 949.113 60.3670   6
   0   2  15 5.47450 16.7873  23
   0   2 -15 37.2816 18.8395   6
   0   3   0 15.5885 19.1623   7
   0   3  -1 1377.35 75.1522   7
   0  -3  -2 18329.4 359.917  17
   0   3  -2 19872.8 356.426   7
   0  -3  -3 570.606 54.4760  17
   0   3  -3 545.610 53.3323   7
   0   3   3 591.039 52.8684  11
   0   3   4 1529.40 94.0835  11
   0  -3  -4 1621.90 95.5365  17
   0   3  -4 1682.69 95.3597   7
   0  -3  -5 1306.98 91.8788  17
   0   3   5 1344.87 95.0083  11
   0   3  -5 1392.98 94.7328   7
   0   3   6 3273.39 159.035  11
   0   3   7 589.317 75.4017  11
   0   3   8 329.679 64.0382  11
   0   3   9 465.840 75.6733  11
   0  -3  -9 349.178 42.7672  21
   0  -3 -10 2620.79 112.146  21
   0  -3 -11 404.592 48.5088  21
   0  -3 -12 295.278 41.0684  21
   0   3  12 395.460 46.5505  30
   0   3  13 2884.52 110.379  30
   0  -3 -13 2776.39 107.259  21
   0   3  14 58.5023 21.6285  30
   0   3  14 60.7850 23.2626  23
   0   3  15 2.15742 13.9954  23
   0   4   0 2446.45 120.417   7
   0   4   1 298.692 43.6570   7
   0   4  -1 401.434 50.1816   7
   0  -4  -1 331.719 49.2486  17
   0   4  -2 1892.43 108.115   7
   0  -4  -2 1981.80 113.094  17
   0  -4  -3 886.781 80.2880  17
   0   4  -3 966.854 82.0006   7
   0   4  -4 12589.1 323.854   7
   0  -4  -4 12058.1 325.583  17
   0  -4  -5 7817.37 261.880  17
   0   4  -5 7091.24 248.445   7
   0   4   7 2012.83 147.790  11
   0   4  -7 2153.10 95.3733  20
   0   4   7 2074.47 97.0429  24
   0   4   7 2187.09 100.006  28
   0   4  -8 464.268 48.2122  20
   0   4   8 461.490 78.1680  11
   0   4   8 543.459 54.5004  28
   0   4   9 2468.40 110.992  28
   0   4  -9 2507.75 106.050  20
   0  -4 -10 4457.75 147.326  21
   0   4  10 4407.17 152.405  28
   0  -4 -11 364.297 45.1966  21
   0   4  12 4343.92 140.868  30
   0  -4 -12 4400.86 136.376  21
   0   4  13 1473.27 73.7828  30
   0   4  13 1720.71 77.2716  23
   0  -4 -13 1699.49 75.5991  21
   0   4  14 313.407 30.8811  23
   0   4  14 386.796 33.2900  30
   0   5   0 7.86479 23.5336   7
   0  -5   0-7.96054 26.0936  17
   0   5  -1 286.072 50.5160   7
   0   5   1 184.109 42.9361   7
   0  -5  -1 272.487 51.3093  17
   0   5   2 357.761 56.3110   7
   0  -5  -2 197.607 45.3742  17
   0   5  -2 306.292 54.9224   7
   0   5   3 765.499 82.7401   7
   0   5  -3 871.071 88.1278   7
   0  -5  -3 841.800 90.8873  17
   0   5   4 59.0613 23.8592  24
   0   5  -4 26.2399 20.0684  20
   0  -5  -4 39.5190 32.3866  17
   0   5   4 9.14481 24.4777   7
   0   5  -4 27.8396 30.4205   7
   0   5  -5 1272.62 114.270   7
   0   5   5 1215.36 74.8648  28
   0   5  -5 1257.20 73.8848  20
   0   5   5 1238.20 74.7636  24
   0  -5  -5 1162.23 112.673  17
   0   5   6 878.737 67.6066  28
   0   5  -6 1014.02 68.8566  20
   0   5   6 1036.90 71.7487  24
   0   5  -7 128.707 33.0969  20
   0   5   7 113.282 33.4519  28
   0   5  -8 710.451 60.1721  20
   0   5   8 773.787 63.8142  28
   0   5   9 371.063 47.9633  28
   0   5  -9 231.356 37.9985  20
   0   5 -10 83.9530 26.4865  20
   0   5  10 25.9932 23.1966  30
   0   5  11 967.822 65.5523  30
   0   5  12 396.461 39.7087  30
   0   5  13 14.1158 16.3596  30
   0   6   0 2230.13 106.825  29
   0   6  -1 1094.79 75.8644  29
   0   6   1 1151.90 78.5406  29
   0  -6  -2 572.971 83.0494  17
   0   6   2 624.447 60.1977  29
   0  -6  -3 161.641 51.2768  17
   0   6   5 41.4752 25.0516  24
   0   6  -5 13.1142 23.0325  20
   0   6  -6 402.136 46.5929  20
   0   6   6 508.907 53.3751  28
   0   6   6 427.883 50.3971  24
   0   6   7 2864.95 120.041  28
   0   6  -7 2935.84 117.527  20
   0   6  -8 293.220 39.5211  20
   0   6   8 248.797 38.6322  31
   0   6  -9 88.7651 25.8428  20
   0   6 -10 81.9611 23.4400  20
   0   6 -11 240.499 29.0764  20
   0   6  12 642.743 38.2317  30
   0   7   0 10.2372 23.7281  29
   0   7  -1 248.291 42.1740  29
   0   7   1 257.331 42.8322  29
   0   7   2 216.683 39.4369  29
   0   7   3 190.355 37.4569  29
   0   7   4 30.4900 23.0633  29
   0   7   5 1200.28 79.5552  29
   0   7   6 159.607 32.0990  29
   0   7   6 166.287 33.8197  31
   0   7  -6 218.028 33.0402  20
   0   7   7 151.280 33.0004  29
   0   7  -7 93.4207 24.7871  20
   0   7   7 115.953 29.5157  31
   0   7   8-9.93589 19.0631  31
   0   7   8-19.0878 20.1129  29
   0   7  -8 3.21405 17.7338  20
   0   7   9 121.125 26.1641  29
   0   7  -9 140.470 24.9597  20
   0   7  10 127.027 22.1201  29
   0   7 -10 181.254 23.2911  20
   0   8   1 37.1507 21.7515  29
   0   8   2 391.272 44.2020  29
   0   8   3 74.4054 23.7216  31
   0   8   3 71.0624 27.2090  29
   0   8   4-13.7155 16.5441  31
   0   8   4 41.0838 22.0706  29
   0   8   5 907.708 56.7027  31
   0   8   5 955.639 59.6081  29
   0   8   6 459.146 40.5936  29
   0   8   6 417.630 37.9702  31
   0   8   7 940.545 51.3083  29
   0   8   7 991.526 50.9441  31
   0   8   8 346.570 28.9399  29
   0   8  -8 378.920 27.5324  20
   0   8   8 351.625 27.9455  31
   1   0 -16-12.3151 14.6085   6
   1   0 -15 1441.01 67.7904   6
   1   0 -14-3.81318 22.2424   6
   1   0 -13 1009.91 70.6699   6
   1   0 -12-4.81460 25.7714   6
   1   0 -11 1978.79 100.399   6
   1   0 -10 13.2410 22.8751   6
   1   0 -10-11.2817 30.1941   2
  -1   0  10-11.5385 26.7440   4
   1   0  -9 1210.52 110.628   2
  -1   0   9 1293.73 113.133   4
   1   0  -8 8.27361 27.1200   2
   1   0  -7 3813.87 165.604   2
   1   0  -7 3811.14 158.079  15
   1   0  -6 5.60325 21.2088   8
   1   0  -6 5.64840 22.0376   2
  -1   0   6 28.2456 19.9220  13
   1   0  -6 20.5944 23.3650  15
   1   0  -5 23081.0 413.962   8
   1   0  -5 23022.0 413.178   2
  -1   0   5 23625.5 397.206  13
   1   0  -5 23616.3 403.877  15
   1   0  -4 14.5891 18.2622   2
   1   0  -4 13.3309 19.4399  15
  -1   0   4-3.17454 16.1766  13
  -1   0   3 7914.96 166.223  13
   1   0  -3 7830.28 172.401   2
   1   0  -2 10.9547 15.3753   2
   1   0  -2 10.0335 15.5428  12
  -1   0   2 8.70666 9.93186  16
   1   0  -1 20630.8 298.510  14
  -1   0   0-3.02586 13.0424   3
  -1   0   0-0.37932 4.32205   7
  -1   0  -1 3231.30 81.0029   1
  -1   0  -1 3386.51 82.3103   9
  -1   0  -2-10.1047 14.5638   9
  -1   0  -2-2.13970 15.2861   1
  -1   0  -3 2302.87 82.5024  10
  -1   0  -3 2439.96 84.0037   9
  -1   0  -4 3.41682 16.4862   9
   1   0   4 7.51128 18.8050   4
   1   0   4 3.36434 17.1440  11
  -1   0  -4 35.1686 19.9671  10
  -1   0  -5 4233.69 144.509  10
   1   0   5 4208.71 137.226  11
   1   0   5 4360.07 147.899   4
   1   0   6-23.2124 24.5577   4
   1   0   6-5.05612 18.5303  11
  -1   0  -7 10917.7 294.832   8
   1   0   7 11005.5 299.346   4
   1   0   8-17.0313 24.1735   4
  -1   0  -8 8.34723 22.3403   8
   1   0   9 7593.39 286.731   4
  -1   0  -9 8076.79 288.419   8
  -1   0 -10 11.3654 35.6690   8
  -1   0 -10 30.3436 24.9511   6
  -1   0 -10 11.3456 28.4048   2
  -1   0 -11 2931.76 121.106   6
  -1   0 -12 4.71274 23.5969   6
  -1   0 -13 537.972 53.4669   6
  -1   0 -14-7.46765 23.1682   6
  -1   0 -15 257.647 32.6977   6
  -1   0 -16-1.72164 12.2994   6
   1   1 -16 16.1031 13.5446   6
   1  -1 -15 60.2952 21.0589   6
   1   1 -15 54.3747 22.1400   6
   1   1 -14-11.0193 20.8541   6
   1  -1 -14-10.7430 23.2307   6
   1  -1 -13 2537.58 103.832  21
   1   1 -13 2237.47 103.062   6
   1  -1 -13 2313.17 104.774   6
   1  -1 -12 1101.93 72.4746  21
   1   1 -12 1171.42 78.7301   6
   1   1 -11 306.934 43.7034   6
   1  -1 -11 342.766 43.6023  21
   1  -1 -11 302.169 44.3582   6
  -1   1  10 2506.48 170.627   4
   1   1 -10 2757.02 114.169   6
   1   1 -10 2224.71 160.438   2
  -1  -1  10 2469.93 172.900   4
   1  -1 -10 2543.35 109.586   6
   1  -1 -10 2403.59 167.118   2
   1  -1 -10 2542.83 106.391  21
  -1  -1   9 332.014 63.2318   4
   1   1  -9 265.768 57.5063   2
  -1   1   9 386.640 65.0725   4
   1  -1  -9 194.897 50.6082   2
   1  -1  -8 239.526 48.9107   2
   1   1  -8 267.735 52.6106   2
  -1   1   8 331.050 55.1864  11
   1  -1  -7 6886.21 231.227   2
   1   1  -7 7340.18 232.512   8
   1   1  -7 7317.32 233.902   2
   1  -1  -7 7209.08 231.275  15
   1  -1  -6 2959.61 132.614   2
   1  -1  -6 3418.37 140.142  15
   1   1  -6 3235.22 135.686   8
  -1   1   6 3023.79 131.896  13
   1   1  -6 3226.02 139.298   2
   1  -1  -5 887.492 66.0868   2
   1  -1  -5 775.831 62.6635  15
   1   1  -5 885.738 63.5088   8
  -1   1   5 804.733 62.3369  13
   1   1  -5 956.483 68.0060   2
   1   1  -5 674.111 55.7355  15
   1   1  -4 1125.91 63.7281   8
   1   1  -4 1172.61 68.1643   2
  -1   1   4 1029.91 64.8180  13
   1  -1  -4 1150.79 66.0286   2
   1   1  -4 1167.09 62.6971  15
   1  -1  -4 1272.56 71.5232  15
   1  -1  -3 1408.99 65.1832   2
   1   1  -3 1379.15 65.3596   2
  -1   1   3 1376.59 67.8242  13
  -1   1   3 1456.36 60.5378  16
   1  -1  -3 1357.88 56.6675  17
   1  -1  -2 51331.9 682.760  12
  -1   1   2 52047.3 674.597  16
   1   1  -2 50969.0 654.891  12
   1   1  -2 51729.6 676.975   2
   1   1  -1 680.429 27.4447   7
   1  -1  -1 752.758 40.5010  12
  -1  -1   1 642.920 34.5400   3
   1  -1  -1 682.453 36.7205  14
  -1   1   1 632.053 35.6929   3
   1   1  -1 690.716 36.7736  14
  -1   1   1 663.207 38.5742  16
  -1   1   0 5475.90 109.438   3
  -1   1   0 5400.85 108.682   7
   1   1   0 5326.22 86.2119   7
  -1  -1   0 5276.61 104.767   3
  -1  -1  -1 139.088 21.4117   1
  -1  -1  -1 116.212 21.9729   9
  -1   1  -1 86.3116 18.0780   7
  -1   1  -1 149.244 21.5053   1
  -1   1  -1 109.782 13.6912   9
   1   1   2 29017.0 422.235  11
  -1  -1  -2 28937.8 399.604  10
  -1   1  -2 28854.1 386.478   9
  -1  -1  -2 28460.4 423.094   9
  -1   1  -2 28506.5 410.919   7
   1   1   3 6729.11 163.284  11
  -1  -1  -3 6502.95 147.948  10
  -1   1  -3 6526.94 153.737   7
  -1   1  -3 6459.89 137.654   9
  -1  -1  -3 6428.47 159.371   9
  -1   1  -3 6551.79 155.718  10
   1   1   4 920.292 59.8854   4
  -1   1  -4 736.133 54.1768  10
  -1  -1  -4 736.174 56.0993   9
   1   1   4 862.837 59.8753  11
   1  -1   4 771.648 56.3174   4
  -1  -1  -5 1379.11 83.4444   9
  -1   1  -5 1570.18 87.4076  10
   1  -1   5 1624.37 90.2403   4
   1   1   5 1578.23 86.6711   4
  -1  -1  -5 1576.52 86.3729   8
   1   1   5 1509.38 87.1366  11
   1  -1   6 935.914 76.3266   4
   1   1   6 857.648 71.4975   4
  -1  -1  -6 1055.31 78.9262   8
   1   1   7 1396.12 98.6534   4
   1   1   7 1408.90 99.8532  11
  -1  -1  -7 1561.03 104.375   8
   1  -1   7 1196.69 93.9640   4
  -1   1  -7 1456.50 102.154   8
   1  -1   8 199.875 47.3111   4
  -1   1  -8 239.120 49.2246   8
   1   1   8 246.819 48.6885  11
   1   1   8 228.062 49.9834   4
  -1  -1  -8 232.554 50.3910   8
  -1   1  -9 2065.47 143.033   8
   1   1   9 1855.85 133.533  11
  -1  -1  -9 1794.34 132.037   8
  -1  -1 -10 599.539 55.3289   6
  -1   1 -10 665.955 89.2138   8
  -1   1 -10 600.816 55.2656   6
  -1  -1 -10 530.505 80.2397   8
  -1  -1 -10 718.066 94.0311   2
  -1   1 -10 629.695 86.9576   2
  -1  -1 -10 631.623 55.9193  21
  -1  -1 -11 626.535 57.3135  21
  -1   1 -11 511.031 53.1551   6
  -1  -1 -11 575.598 54.4708   6
  -1   1 -12 2952.09 121.151   6
  -1  -1 -12 2988.53 119.205  21
  -1  -1 -12 2865.23 119.844   6
  -1  -1 -13 523.359 50.6078   6
  -1   1 -13 491.891 51.9741   6
   1   1  14 67.2589 25.2601  23
  -1   1 -14 57.9922 28.9075   6
  -1  -1 -14 59.4056 22.9197   6
  -1  -1 -15 15.2685 15.6078   6
   1   1  15 16.2065 18.0749  23
  -1   1 -15 50.9488 19.9812   6
  -1   1 -16 106.805 17.0432   6
   1  -2 -15 279.767 28.5845  21
   1   2 -14 1502.98 73.1264   6
   1  -2 -14 1466.85 72.3815  21
   1  -2 -13 1210.24 72.3783  21
   1   2 -13 1225.92 72.6241   6
   1   2 -12 79.5484 30.1759   6
   1  -2 -12 115.473 30.3253  21
   1   2 -11 6490.47 184.988   6
   1  -2 -11 6593.39 184.268  21
   1  -2 -10 2887.82 116.667  21
  -1   2  10 2642.67 182.763  11
   1   2  -9 1724.32 94.3837  26
  -1   2   9 1758.99 137.483  11
   1  -2  -9 1658.68 84.6619  21
  -1   2   8 1839.30 131.495  11
   1  -2  -7 20867.7 451.757  15
  -1   2   6 3448.03 151.808  13
   1  -2  -6 3281.81 148.132  15
  -1   2   5 10830.3 269.487  13
   1  -2  -5 11293.3 266.632  15
   1  -2  -4 1990.16 94.0018  17
   1  -2  -4 2078.00 96.5302  15
  -1   2   4 2273.42 104.729  13
   1  -2  -3 11276.7 236.758  15
   1   2  -3 11041.5 221.204   7
  -1   2   3 11720.4 245.589  13
  -1   2   3 11078.1 238.152  16
  -1   2   2 56674.5 789.397  13
   1   2  -2 57774.8 757.676   7
   1  -2  -2 57724.5 772.155  12
  -1   2   2 58195.2 790.388  16
   1   2  -1 196026. 2337.87   7
   1  -2  -1 196618. 2349.25  12
  -1   2   1 195676. 2381.84  16
  -1   2   0 116016. 1435.36   7
  -1  -2   0 115194. 1415.17  17
  -1   2   0 115353. 1441.00  16
   1   2   0 113893. 1401.40   7
  -1  -2  -1 43215.3 594.602   9
  -1   2  -1 42386.6 601.061  16
  -1  -2  -1 42055.2 595.502  17
  -1   2  -1 42637.3 599.263   7
   1   2   2 8198.08 184.680  11
  -1  -2  -2 7885.57 182.919  17
  -1   2  -2 7676.78 180.576   7
  -1  -2  -3 51178.7 731.296   9
  -1   2  -3 50929.1 730.621   7
   1   2   3 51245.2 729.981  11
  -1   2  -3 50663.2 710.408  10
  -1   2  -4 16712.2 327.211   7
  -1  -2  -4 16268.0 328.319   9
   1   2   4 16267.6 331.843  11
  -1   2  -4 16620.1 317.452  10
  -1   2  -5 1743.01 97.9041   7
  -1   2  -5 1968.33 99.8694  10
  -1  -2  -5 1804.51 101.850   9
   1   2   5 1654.99 99.1313  11
  -1   2  -6 24164.8 463.045  10
   1   2   6 23524.9 476.899  11
   1   2   7 16892.1 406.313  11
  -1   2  -7 17296.7 399.799   8
  -1   2  -8 326.960 56.8084   8
   1   2   8 252.416 53.9109  11
  -1  -2  -9 814.182 59.6845  21
  -1   2  -9 778.505 91.9093   8
   1   2   9 811.351 95.2142  11
  -1  -2 -10 1615.08 87.2784  21
   1   2  10 1731.07 90.6899  30
  -1  -2 -11 15566.1 318.458  21
   1   2  11 16200.8 324.791  30
  -1   2 -11 15963.6 319.149   6
  -1  -2 -12 537.145 54.6774  21
   1   2  12 590.460 55.7084  30
  -1   2 -12 681.378 59.5751   6
   1   2  13 689.508 58.0524  23
  -1   2 -13 523.208 50.5798   6
   1   2  14 758.314 55.7560  23
  -1   2 -14 784.189 53.9138   6
   1   2  15 1443.40 63.6351  23
  -1   2 -15 1390.85 58.3283   6
  -1   3  15 63.1973 17.2443  23
   1  -3 -14 201.786 30.0362  21
   1  -3 -13 307.861 38.8164  21
  -1   3  13 378.573 41.6287  30
   1  -3 -12 946.328 66.6309  21
   1  -3 -11 1681.80 89.9548  21
   1   3 -10 56.2841 28.1824  26
   1  -3 -10-4.47535 22.8059  21
   1  -3  -9 290.845 41.0395  21
   1   3  -9 359.160 49.3194  26
  -1   3   9 346.225 67.8840  11
   1  -3  -8 1298.50 73.1725  21
   1   3  -8 1307.01 81.8801  26
  -1   3   8 1282.65 73.7527  28
  -1   3   8 1106.01 112.557  11
  -1   3   7 167.342 45.7508  11
   1  -3  -5 2377.08 122.272  17
   1  -3  -4 408.708 51.3413  17
  -1   3   4 477.434 53.7525  13
  -1   3   3 3073.61 124.837  13
  -1   3   2 6787.84 196.913  16
  -1   3   1 13.3818 18.8781   7
  -1   3   1 42.1017 23.4244  16
  -1   3   0 475.215 49.4751  16
  -1   3   0 449.806 47.6007   7
  -1   3  -1 80.9578 26.2543   7
  -1   3  -1 77.3196 25.0762  16
  -1  -3  -1 107.698 27.7338  17
  -1   3  -2 3296.12 124.965  16
  -1   3  -2 3661.62 135.107   7
  -1  -3  -2 3578.26 134.385  17
   1   3   3 983.226 71.9829  11
  -1  -3  -3 1144.51 80.1626  17
  -1   3  -3 1105.30 77.2448   7
  -1   3  -4 2882.07 134.344   7
   1   3   4 2774.56 130.737  11
  -1  -3  -5 434.791 58.2345   9
  -1   3  -5 574.593 65.3208   7
   1   3   5 564.504 64.6305  11
   1   3   6 2883.82 153.290  11
   1   3   7 970.279 96.8286  11
  -1  -3  -8 1446.16 77.6230  21
   1   3   8 1445.55 80.0694  28
   1   3   8 1266.01 119.235  11
   1   3   9 54.8952 26.3348  30
   1   3   9 70.9665 35.3953  11
  -1  -3  -9 17.0422 25.1815  21
   1   3  10 4.80751 25.3281  30
  -1  -3 -10-13.5589 27.0479  21
  -1  -3 -11 3102.50 123.498  21
   1   3  11 3132.16 126.934  30
   1   3  12 1491.22 86.6718  23
  -1  -3 -12 1608.59 85.0735  21
   1   3  12 1641.91 88.7807  30
   1   3  13 94.7104 28.7205  23
   1   3  13 169.087 31.2343  30
   1   3  14 61.9372 21.4899  30
   1   3  14 64.0975 20.0230  23
   1   3  15 23.9277 14.4952  23
  -1   4  14 6.49171 14.0378  30
   1  -4 -14 12.3894 15.9936  21
   1  -4 -13 839.999 52.7105  21
  -1   4  13 813.906 54.5255  30
   1  -4 -12 10.9107 21.2145  21
  -1   4  11 1512.10 83.9419  28
   1  -4 -11 1743.19 87.4846  21
  -1   4  10 342.099 45.0050  28
   1   4 -10 261.835 44.6004  26
  -1   4   9 136.299 34.7875  28
   1   4  -9 213.129 42.5005  26
   1   4  -9 166.573 32.6399  20
   1   4  -8 2966.43 130.182  26
   1   4  -8 2909.00 116.015  20
  -1   4   8 2804.82 116.963  24
  -1   4   8 2945.58 119.928  28
  -1   4   8 2791.43 186.985  11
   1   4  -7 422.208 49.5737  26
  -1   4   7 468.991 74.2832  11
  -1   4   7 363.644 44.4409  24
   1   4  -7 475.494 47.2732  20
  -1   4   7 468.712 48.4017  28
   1  -4  -5 736.614 79.4326  17
   1  -4  -4 1252.30 98.2694  17
   1  -4  -3 2488.90 134.066  17
  -1   4   2 2283.15 126.111   7
  -1   4   1 6408.12 211.943   7
  -1   4   1 6754.49 218.228  16
  -1   4   0 767.859 71.1252   7
  -1   4   0 816.717 73.3741  16
  -1   4  -1 1089.14 83.0705  16
  -1   4  -1 1043.11 82.8132   7
  -1  -4  -1 1040.45 81.5870  17
  -1   4  -2 507.675 59.9041   7
  -1  -4  -2 487.412 58.9401  17
  -1   4  -3 4480.90 183.401   7
  -1  -4  -3 4525.95 184.012  17
  -1   4  -4 2528.28 141.225   7
  -1   4  -5 69.3097 32.8015   7
  -1   4  -6 3615.33 191.471   7
   1   4   7 671.495 59.0369  28
   1   4   7 714.386 57.2133  31
   1   4   8 519.320 52.6359  30
   1   4   8 430.871 75.7528  11
  -1   4  -9 1177.47 72.5789  20
   1   4   9 1177.31 78.5888  30
  -1  -4 -10 90.3623 29.9517  21
   1   4  10 162.233 36.1463  30
   1   4  11 470.521 50.2172  30
   1   4  12 94.9706 27.6350  23
   1   4  12 107.133 28.3702  30
   1   4  13 1458.60 71.7143  30
   1   4  13 1475.84 69.9845  23
   1   4  14 37.3238 15.5490  30
   1   4  14 14.5901 13.9487  23
  -1   5  13 432.965 34.3891  30
  -1   5  12 284.888 34.8170  30
  -1   5  11 215.794 33.3056  28
   1   5 -10 481.061 53.5251  26
  -1   5  10 520.911 51.6146  28
   1   5 -10 477.467 46.7457  20
   1   5  -9 37.9861 27.6545  26
   1   5  -9 4.33032 22.4461  20
  -1   5   9 65.8001 26.6865  28
   1   5  -8 89.3638 34.2625  26
   1   5  -8 63.1653 27.0163  20
  -1   5   8 91.3850 32.1943  28
  -1   5   7 675.371 60.8033  28
   1   5  -7 687.972 60.2376  20
  -1   5   7 758.289 62.9285  18
   1   5  -7 732.939 66.5117  26
  -1   5   7 596.938 57.5227  24
   1  -5  -6 521.670 79.4664  17
   1   5  -6 465.158 48.9538  20
  -1   5   6 496.181 53.1664  18
  -1   5   6 396.588 46.8842  24
  -1   5   6 450.525 49.4426  28
   1   5  -5 589.955 52.5116  20
  -1   5   5 574.146 55.2867  18
  -1   5   5 609.707 54.5296  24
   1  -5  -5 495.888 76.9773  17
  -1   5   5 582.105 52.6220  28
   1   5  -5 601.483 58.1867  29
   1   5  -4 2996.09 123.709  29
   1   5  -4 2845.05 111.004  20
  -1   5   4 2963.65 118.119  18
  -1   5   4 2996.76 172.582   7
   1  -5  -4 3062.30 175.065  17
  -1   5   4 3090.30 117.304  24
  -1   5   3 37.3118 27.9180   7
   1  -5  -3 76.7773 37.4475  17
  -1   5   2 154.070 46.9945   7
   1  -5  -2 111.110 40.1772  17
  -1   5   1 376.667 62.1786   7
  -1   5   0 2493.99 146.378   7
  -1   5  -1 1264.95 105.424   7
  -1   5  -2 272.203 54.3905   7
  -1   5  -3 57.0818 33.6895   7
  -1   5  -4 714.722 87.1683   7
  -1   5  -5 2801.49 173.968   7
   1   5   6 92.2715 30.2640  31
   1   5   7 126.975 33.9138  31
  -1   5  -7 98.5171 28.7669  20
   1   5   8 83.5171 29.1406  31
  -1   5  -8 94.3653 28.5417  20
   1   5   9 146.234 34.8578  30
  -1   5  -9 99.2459 30.8573  20
   1   5  10 608.444 55.0932  30
  -1   5 -10 686.633 54.0132  20
   1   5  11 763.775 57.2477  30
   1   5  12 42.1854 20.3678  30
   1   5  13 338.328 31.2304  30
  -1   6  12 637.782 36.4863  30
  -1   6  11 869.291 49.6785  30
   1   6 -11 900.145 49.7967  20
   1   6 -10 155.971 31.2054  26
   1   6 -10 100.791 24.4358  20
   1   6  -9 635.354 52.2263  20
  -1   6   9 564.944 52.0491  28
   1   6  -9 542.879 53.8837  26
   1   6  -8 2324.65 101.672  20
   1   6  -8 2298.41 110.898  26
  -1   6   8 2349.08 105.545  28
   1   6  -7 1287.75 86.5465  26
   1   6  -7 1230.50 75.6600  20
  -1   6   7 1139.74 76.6301  28
  -1   6   7 1111.66 74.7647  24
   1   6  -6 4819.81 156.666  20
  -1   6   6 4721.30 154.646  28
  -1   6   6 4999.77 163.467  24
  -1   6   5 290.849 41.7021  24
   1   6  -5 291.025 40.9895  20
   1   6  -5 199.178 39.8949  29
   1   6  -4 160.619 34.7590  29
  -1   6   4 93.4526 27.9975  24
  -1   6   3 75.1670 28.8253  18
   1   6  -3 89.8755 30.8529  29
  -1   6   3 86.0263 27.1133  24
   1   6  -2 510.956 54.7909  29
  -1   6   2 605.479 54.5891  24
   1   6  -1 2624.27 120.184  29
   1  -6  -1 2359.74 167.373  17
   1   6   0 2524.63 117.295  29
   1  -6   0 2181.49 158.282  17
   1   6   1 976.378 74.9800  29
   1   6   2 1958.11 104.552  29
   1   6   3 593.493 59.9298  29
  -1   6  -5 100.576 28.3775  20
   1   6   5 38.6799 25.4843  31
  -1   6  -6 1416.97 81.5224  20
   1   6   6 1335.85 82.6500  31
   1   6   7 452.679 51.7702  31
  -1   6  -7 468.557 48.6125  20
  -1   6  -8 1654.62 85.2737  20
   1   6   8 1495.85 83.6937  31
  -1   6  -9 634.872 51.8956  20
   1   6   9 547.641 49.2076  31
  -1   6 -10 266.713 32.5340  20
  -1   6 -11 1206.21 56.3686  20
   1   6  12 507.647 34.3853  29
   1   7  -9 38.4326 18.3097  20
  -1   7   9 46.8001 18.0533  29
   1   7  -9 32.0554 19.6975  26
   1   7  -8 760.204 51.4718  20
  -1   7   8 669.396 50.3896  29
   1   7  -8 710.355 53.5836  26
   1   7  -7 46.6402 24.0735  26
   1   7  -7 6.97557 18.6706  20
   1   7  -6 29.9521 20.6604  20
  -1   7   6 20.4636 22.9138  24
   1   7  -6 42.4100 25.6167  26
  -1   7   5 51.5834 24.4124  24
  -1   7   4-4.38865 20.3441  24
   1   7  -4 5.07973 22.0268  29
   1   7  -3 266.431 41.1653  29
  -1   7   3 242.007 38.4966  24
   1   7  -2 74.2631 29.2799  29
   1   7  -1 32.0939 26.7850  29
   1   7   0 155.541 34.8393  29
   1   7   1 16.0909 23.8059  29
   1   7   2 15.9803 23.0987  29
   1   7   3 53.5580 26.7122  31
   1   7   3 10.5328 23.3761  29
   1   7   4 44.7958 23.2225  31
   1   7   4 46.3345 25.3185  29
   1   7   5 524.778 53.7120  29
   1   7   5 464.598 50.2612  31
  -1   7  -6 140.559 29.3355  20
   1   7   6 132.782 30.2092  31
   1   7   6 190.531 34.1056  29
  -1   7  -7 72.5470 24.0416  20
   1   7   7 60.3591 24.2305  31
  -1   7  -8 211.488 30.3560  20
   1   7   8 143.190 29.1463  29
   1   7   8 210.946 30.9366  31
  -1   7  -9 73.7735 18.9760  20
   1   7   9 118.488 21.9552  31
   1   7   9 54.0693 19.7137  29
  -1   7 -10 49.4509 15.9116  20
   1   7  10 84.4669 18.9441  29
  -1   8   7 66.6598 17.7548  31
  -1   8   6 398.129 36.4954  31
   1   8  -6 407.501 38.5422  26
   1   8  -5 118.982 26.1685  26
   1   8  -3 274.454 37.9660  29
   1   8  -2-12.3769 19.9062  29
   1   8  -1 76.5615 26.4067  29
   1   8   0 305.434 40.8574  29
   1   8   1 59.9415 24.9838  29
   1   8   2 75.4069 25.3972  29
   1   8   3 595.230 51.9344  29
   1   8   4 18.9811 18.2089  31
   1   8   4 3.77132 17.4829  29
   1   8   5 74.1716 21.2030  31
   1   8   5 30.9213 18.9652  29
   1   8   6 222.629 28.5805  31
   1   8   6 186.254 28.2381  29
   1   8   7 219.137 25.7822  31
   1   8   7 230.977 27.4278  29
   1   8   8 89.1149 17.2429  29
   1   8   8 88.6992 16.4806  31
  -1   9   3 9.56196 10.9788  31
   1   9   0 13.5587 14.5035  29
   1   9   1 13.4654 13.7632  29
   1   9   2 66.3653 17.4426  29
   1   9   3 1.94728 11.9414  29
   2   0 -15-2.42100 15.0221   6
   2   0 -14 738.438 53.9753   6
   2   0 -13 12.7179 23.0442   6
   2   0 -12 5019.15 162.914   6
   2   0 -11 4.85758 26.8016   6
   2   0 -10 6506.25 187.093   6
   2   0  -9-4.28030 22.5506   6
   2   0  -9-9.75483 31.9751  15
   2   0  -8 7452.20 273.994   2
   2   0  -8 7619.37 264.326  15
   2   0  -7 16.0296 22.7518   2
   2   0  -7-7.30745 23.9529  15
   2   0  -6 2941.02 138.663  15
  -2   0   5-10.4837 19.8402  13
   2   0  -5 5.34382 21.4531  15
   2   0  -4 29720.6 492.595  12
   2   0  -3 3.89205 20.1716  12
   2   0  -2 10756.3 229.691  12
   2   0  -2 11172.3 240.062  14
   2   0  -1 10.1120 19.1367  14
  -2   0   1-6.61514 19.5453   3
  -2   0   0 28.8622 19.6687   3
  -2   0  -1-6.63369 18.5679   1
  -2   0  -2 51839.3 722.200   9
  -2   0  -2 52450.7 732.190   1
  -2   0  -3 4.15103 19.2425   1
  -2   0  -3-3.86527 18.2874   9
  -2   0  -4 71369.6 987.499  10
  -2   0  -4 70223.5 981.513   9
  -2   0  -5-5.56795 22.3529  10
  -2   0  -5 32.1197 24.8158   9
  -2   0  -6 1845.80 112.020  10
  -2   0  -6 1768.12 106.731   9
  -2   0  -8 1053.08 101.494   8
  -2   0  -9-10.9249 31.0131   8
  -2   0  -9 29.0672 25.4645   6
  -2   0 -10 39237.4 606.926   6
  -2   0 -11-23.4021 26.9407   6
  -2   0 -12 2326.22 106.089   6
  -2   0 -13 28.5062 23.7561   6
  -2   0 -14 5146.65 140.341   6
   2   0  15-7.11352 15.5450   5
   2  -1 -15 172.288 23.8959   6
   2   1 -15 205.738 26.5493   6
   2   1 -14 52.3531 22.7608   6
   2  -1 -14 57.6186 23.4706   6
   2  -1 -13 1135.23 71.1842   6
   2   1 -13 1079.99 70.2000   6
   2  -1 -13 1059.62 65.8312  21
   2   1 -12 2598.18 113.557   6
   2  -1 -12 2468.11 110.571   6
   2  -1 -12 2539.39 107.718  21
   2  -1 -11 726.489 61.2137  21
   2  -1 -11 678.803 62.5338   6
   2   1 -10 269.123 42.4314   6
   2  -1 -10 211.458 39.4857   6
   2  -1 -10 243.575 36.9415  21
   2  -1  -9 278.978 39.1819  21
   2   1  -9 278.592 40.7223   6
   2  -1  -9 382.722 44.5966   6
   2  -1  -9 428.099 74.0272  15
  -2   1   8 603.960 74.0020  13
   2  -1  -8 469.093 70.4369  15
  -2   1   7 7611.95 251.574  13
   2  -1  -7 7253.77 248.994  15
  -2   1   6 952.623 82.2510  13
   2  -1  -6 957.356 83.8390  15
  -2   1   5 580.342 60.8510  13
   2  -1  -5 641.269 63.1264  15
  -2   1   4 3304.29 134.305  13
   2  -1  -4 3577.07 136.641  12
   2   1  -3 5618.10 153.809  12
   2  -1  -3 5805.84 167.189  12
  -2   1   3 5491.29 161.122   3
   2   1  -2 5581.16 145.836  12
   2  -1  -2 5663.17 157.774  14
   2  -1  -2 5717.62 159.400  12
  -2   1   2 5622.64 149.270  16
  -2  -1   2 5742.29 154.149   3
   2   1  -2 5446.48 154.801  14
  -2   1   2 5605.81 154.103   3
   2  -1  -1 879.028 58.6779  14
  -2   1   1 931.316 58.6420   3
  -2  -1   1 922.078 56.7889   3
   2   1  -1 882.781 58.0209  14
  -2  -1   0 12519.8 242.241   3
  -2   1   0 12821.8 246.243   3
  -2  -1  -1 1439.02 74.4125   9
  -2  -1  -1 1440.59 70.9305   1
  -2   1  -1 1336.44 71.7919   1
  -2   1  -2 3637.97 122.553   1
  -2  -1  -2 3759.17 121.491   1
  -2  -1  -2 3652.36 126.949   9
  -2  -1  -3 3330.97 128.057   9
  -2  -1  -3 3411.71 116.847  10
  -2   1  -4 5053.14 166.957  10
  -2  -1  -4 5055.98 168.831   9
  -2  -1  -4 4847.66 155.114  10
  -2  -1  -5 1995.99 110.844   9
  -2   1  -5 2014.24 111.172  10
  -2  -1  -5 2068.78 106.275  10
  -2   1  -6 3439.50 157.881  10
  -2  -1  -6 3256.34 153.497   9
  -2   1  -7 2403.45 139.964  10
  -2  -1  -7 2469.79 140.100   8
  -2  -1  -8 870.909 92.0753   8
  -2   1  -9 2198.54 157.756   8
   2   1   9 2136.55 97.4760  30
  -2  -1  -9 1837.98 90.5579   6
  -2   1  -9 2143.61 98.3664   6
   2   1  10 52.7795 28.7191  23
  -2  -1 -10 61.5778 29.1381   6
  -2   1 -10 22.6487 26.0770   6
  -2   1 -11 1511.04 87.0722   6
   2   1  11 1474.61 89.0760  23
  -2  -1 -11 1517.35 85.6357   6
  -2  -1 -12 1536.93 84.3696   6
   2   1  12 1563.20 89.1861  23
  -2   1 -12 1510.43 85.5236   6
   2   1  13 161.091 33.4266  23
  -2   1 -13 127.425 32.0062   6
  -2  -1 -13 107.347 26.9441   6
  -2  -1 -14 106.377 24.2638   6
  -2   1 -14 111.475 25.9541   6
   2   1  14 100.497 24.9506  23
   2   1  15 12.5200 15.2943   5
   2  -1  15-4.52132 14.6651   5
   2  -2 -15 284.631 25.6743  21
   2   2 -14 660.220 46.0448   6
   2  -2 -14 620.327 45.6713  21
   2  -2 -13 302.315 37.4264  21
   2   2 -13 273.693 36.8499   6
   2  -2 -12 275.077 40.5771  21
   2   2 -12 299.339 42.5358   6
   2  -2 -11 396.671 46.9166  21
   2   2 -11 343.391 46.2429   6
   2  -2 -10 649.780 57.8467  21
   2  -2  -9 2685.87 110.453  21
   2   2  -9 2582.65 120.565  26
  -2   2   9 2327.04 168.741  11
   2  -2  -9 2492.16 170.683  15
   2  -2  -8 1669.64 129.226  15
   2   2  -8 1532.66 89.0339  26
   2  -2  -8 1630.98 82.1706  21
  -2   2   7 1789.43 127.111  13
   2  -2  -7 2011.21 134.800  15
  -2   2   6 883.368 84.5843  13
   2  -2  -6 821.712 82.2302  15
  -2   2   5 5843.79 205.688  13
   2  -2  -5 5515.47 195.876  15
  -2   2   4 3032.40 138.760  13
   2  -2  -3 4436.91 154.690  12
  -2   2   3 4473.42 152.319  16
  -2   2   3 4648.07 162.635  13
   2  -2  -2 16314.7 320.716  12
  -2   2   2 15854.5 320.276  16
   2  -2  -1 184.359 32.0389  12
  -2   2   1 214.009 33.6077   7
  -2   2   1 208.632 35.4685  16
  -2   2   0 149.297 28.1431   7
  -2   2   0 213.189 32.6167  16
  -2  -2  -1 347.850 43.1211   9
  -2   2  -1 273.123 36.4983   1
  -2   2  -1 362.665 38.6208   7
  -2  -2  -2 4319.11 149.226   9
  -2   2  -2 4228.80 137.799   1
  -2   2  -2 4038.36 134.122   7
  -2  -2  -3 735.385 65.6013   9
  -2   2  -3 652.651 56.7346   7
  -2   2  -4 818.962 68.5207  10
  -2  -2  -4 682.352 68.3347   9
  -2   2  -4 664.818 60.8218   7
  -2   2  -5 4088.12 165.601  10
  -2  -2  -5 3875.48 167.347   9
  -2   2  -6 6552.16 229.868  10
  -2  -2  -6 6927.61 243.404   9
  -2   2  -7 2985.47 160.800  10
  -2  -2  -7 2930.06 165.707   9
  -2  -2  -8 576.806 52.1800  21
   2   2   8 505.715 48.3596  30
   2   2   8 565.405 53.3073  23
   2   2   9 3645.68 135.721  23
  -2   2  -9 3724.93 208.116   8
   2   2   9 3605.47 132.702  30
   2   2  10 1447.81 88.1107  23
   2   2  10 1528.98 87.5387  30
  -2   2 -10 1497.83 84.2972   6
   2   2  11 64.9437 27.5818  23
  -2   2 -11 115.146 32.2044   6
   2   2  11 89.6005 30.2814  30
   2   2  12 1156.69 76.3873  23
   2   2  12 1126.69 73.2450  30
  -2   2 -12 1216.81 74.0728   6
   2   2  13 76.4998 26.9451  23
  -2   2 -13 81.4044 26.3759   6
   2   2  13 10.9211 20.0928  30
   2   2  14 80.7488 22.5889  23
  -2   2 -14 67.5635 20.9491   6
   2   2  15 185.702 23.9511  23
   2  -3 -14 455.738 36.4797  21
   2  -3 -13 410.749 40.7297  21
   2  -3 -12 299.779 40.8614  21
   2  -3 -11 34.9437 23.7465  21
   2  -3 -10 684.378 60.3137  21
   2   3  -9 618.287 61.7610  26
   2  -3  -9 610.283 56.3577  21
  -2   3   9 654.796 57.6284  28
   2  -3  -8 24.6804 23.0284  21
   2   3  -8 21.1753 25.5435  26
   2  -3  -8 21.1947 33.2589  15
  -2   3   7 717.811 88.6677  13
   2  -3  -7 760.770 57.3005  21
   2   3  -7 786.250 57.5690  20
   2   3  -7 886.504 68.8128  26
   2  -3  -7 796.421 89.2788  15
  -2   3   6 413.864 63.3160  13
  -2   3   5 1998.00 125.882  13
  -2   3   4 5154.44 196.822  13
  -2   3   4 5400.54 196.096  16
  -2   3   3 4498.87 172.575  13
  -2   3   3 4659.37 175.039  16
  -2   3   2 752.075 66.6323  13
  -2   3   2 659.582 62.1530   7
  -2   3   2 754.517 69.1061  16
  -2   3   1 2513.97 123.809  16
  -2   3   1 2598.91 117.885   7
  -2   3   0 1534.30 89.7426   7
  -2  -3   0 1466.36 90.8644   9
  -2   3   0 1457.01 93.1648  16
  -2   3  -1 4796.78 162.558   7
  -2   3  -1 4414.05 162.635  16
  -2   3  -2 347.018 46.3184   7
  -2  -3  -2 270.650 42.5606   9
  -2   3  -2 358.763 48.3373  16
  -2  -3  -3 4172.01 167.187   9
  -2   3  -3 4139.12 162.523   7
  -2   3  -3 4078.58 160.174  16
  -2  -3  -4 3625.42 165.518   9
  -2   3  -4 4337.76 173.311   7
  -2  -3  -5 1177.72 99.3911   9
  -2   3  -5 1227.77 97.2614   7
  -2  -3  -6 374.591 62.4900   9
   2   3   7 290.780 40.2146  23
   2   3   7 242.793 35.6547  31
   2   3   7 322.204 42.4023  30
   2   3   8 122.343 33.5133  23
   2   3   8 107.980 30.1322  30
   2   3   9 896.846 67.9358  23
   2   3   9 826.137 66.8394  30
   2   3  10 1736.36 94.2662  23
   2   3  10 1695.50 93.1295  30
   2   3  11 143.085 34.4156  23
   2   3  11 163.285 34.8042  30
   2   3  12 925.768 66.5601  23
   2   3  12 855.815 63.7233  30
   2   3  13 169.168 29.8896  23
   2   3  13 164.713 29.3880  30
   2   3  14 133.821 24.0326  23
   2  -4 -14 121.878 19.0069  21
  -2   4  14 127.099 18.6855  30
   2  -4 -13 445.130 37.3903  21
   2  -4 -12 835.648 55.9557  21
   2  -4 -11 321.030 40.9200  21
  -2   4  11 319.515 40.8836  28
   2  -4 -10 1160.01 74.4050  21
  -2   4  10 1267.22 78.4236  28
   2   4 -10 1238.31 86.9304  26
  -2   4   9 211.483 38.3178  28
   2   4  -9 143.107 39.4946  26
   2   4  -9 214.347 36.3491  20
  -2   4   8 13735.1 292.161  28
   2   4  -8 13500.1 313.302  26
   2   4  -8 13324.0 283.130  20
  -2   4   7 1559.62 138.304  11
   2   4  -7 1459.05 82.2084  20
  -2   4   7 1821.35 92.9262  18
  -2   4   7 1531.32 87.9837  28
   2   4  -7 1524.90 94.4644  26
  -2   4   6 942.361 67.7596  18
   2   4  -6 1025.58 68.5190  20
  -2   4   6 999.183 68.9503  24
   2   4  -5 2271.97 95.7016  20
  -2   4   5 1991.04 94.2687  18
   2   4  -5 2089.26 101.423  29
  -2   4   3 2869.64 157.666  16
  -2   4   3 2918.36 152.484   7
  -2   4   2 50002.1 848.040  16
  -2   4   2 51289.4 834.365   7
  -2   4   1 7529.67 252.757  16
  -2   4   1 7947.61 251.832   7
  -2   4   0 31059.7 593.916  16
  -2   4   0 32096.6 590.746   7
  -2   4  -1 4775.50 193.793  16
  -2   4  -1 5182.13 197.319   7
  -2   4  -2 9369.50 276.694  16
  -2   4  -2 8660.84 271.013   7
  -2   4  -3 543.232 69.3305   7
  -2   4  -4 96.0929 36.9836   7
  -2   4  -5 7576.12 276.687   7
   2   4   5 7860.77 198.691  31
   2   4   6 7401.09 194.887  31
   2   4   7 350.597 45.7377  31
   2   4   7 280.571 42.6587  30
   2   4   8 2148.07 103.441  30
   2   4   8 2393.31 108.041  31
   2   4   9 189.460 37.8277  30
   2   4  10 3353.04 129.599  30
   2   4  11 130.316 30.3387  30
   2   4  11 158.926 32.7605  23
   2   4  12 820.111 57.4012  23
   2   4  12 928.814 59.8126  30
   2   4  13 255.974 30.2991  30
   2   4  13 235.970 29.2722  23
  -2   5  13 3.43678 11.4977  30
  -2   5  11 324.237 37.3612  28
   2   5 -10 283.309 42.5462  26
   2   5 -10 323.746 38.6914  20
  -2   5  10 372.021 42.9880  28
   2   5  -9 64.0643 29.8965  26
   2   5  -9 103.413 28.7738  20
  -2   5   9 44.6259 24.9941  28
   2   5  -8 1099.55 73.1185  20
  -2   5   8 1119.14 75.3331  18
   2   5  -8 1165.04 85.0146  26
  -2   5   8 1157.99 77.7041  28
  -2   5   8 1066.83 72.6857  24
   2   5  -7 95.8542 29.9323  20
  -2   5   7 73.1344 28.0722  18
  -2   5   7 60.9667 26.6356  24
  -2   5   7 42.6760 26.1726  28
   2   5  -7 45.6782 30.5715  26
   2   5  -6 230.278 38.9926  20
  -2   5   6 203.698 37.2421  28
  -2   5   6 186.205 36.5820  18
  -2   5   6 186.600 35.1124  24
  -2   5   5 4.80105 23.6062  18
   2   5  -5-4.36741 23.7404  20
   2   5  -5 5.27966 23.9595  29
  -2   5   5 17.6942 21.7501  28
  -2   5   5 36.4781 24.4076  24
   2   5  -4 87.3908 27.0145  20
   2  -5  -4 52.6799 37.3162  17
  -2   5   4 125.156 31.3400  18
   2   5  -4 96.7690 30.1132  29
  -2   5   4 52.7434 29.9616   7
  -2   5   4 101.873 29.6527  24
  -2   5   3 1917.05 96.3695  18
  -2   5   3 2032.89 96.6621  24
   2   5  -3 1899.26 99.1351  29
  -2   5   3 1966.98 142.618   7
   2  -5  -3 2089.34 148.938  17
  -2   5   2 550.699 77.1241   7
  -2   5   2 731.719 58.3196  18
   2   5  -2 683.772 60.7790  29
  -2   5   2 677.414 55.6547  24
   2   5  -1-9.27742 23.6373  29
  -2   5   1 10.1132 27.0667  16
  -2   5   1 8.17663 20.4704  24
  -2   5   1 19.1429 28.6405   7
  -2   5   0 217.942 35.5029  24
  -2   5   0 152.113 43.2148   7
   2   5   0 283.592 43.7829  29
  -2   5   0 206.820 51.1034  16
  -2   5  -1 44.1546 22.7997  24
   2   5   1 100.610 27.3769  29
  -2   5  -1 38.7435 34.2997   7
  -2   5  -1 48.1761 32.8797  16
   2   5   2 134.125 32.1772  29
  -2   5  -2 84.6910 26.4603  24
  -2   5  -2 59.9387 34.0991   7
   2   5   3 582.274 53.2775  31
  -2   5  -3 448.376 46.7983  24
  -2   5  -3 467.894 73.8495   7
   2   5   4 169.328 34.8065  31
  -2   5  -4 98.0408 41.2622   7
   2   5   5 9.31517 24.1394  31
   2   5   6 402.852 48.6739  31
   2   5   7 419.087 50.3704  31
   2   5   8 653.664 58.4273  31
  -2   5  -9 90.5204 28.3726  20
   2   5   9 133.177 30.4467  31
  -2   5 -10 419.630 41.7287  20
   2   5  10 456.060 45.7643  30
   2   5  11 2076.97 85.2688  30
   2   5  12 87.6220 20.1260  30
  -2   6  11 293.949 29.1700  30
  -2   6  10 32.5849 18.8069  28
   2   6  -9 503.789 45.2216  20
  -2   6   9 525.037 48.0807  28
   2   6  -9 618.692 54.9712  26
   2   6  -8 194.125 36.7791  26
   2   6  -8 124.173 28.9642  20
  -2   6   8 152.680 32.5301  28
   2   6  -7 89.6633 33.8544  26
   2   6  -7 21.0622 21.1004  20
  -2   6   7 59.9641 27.1943  28
  -2   6   7 70.8047 25.8198  24
  -2   6   6 456.621 50.2020  24
   2   6  -6 490.230 50.1941  20
  -2   6   6 521.428 53.9659  18
  -2   6   6 507.974 52.3924  28
   2   6  -5 246.469 39.3954  20
  -2   6   5 226.732 39.1287  18
  -2   6   5 285.802 41.6557  24
   2   6  -4 733.475 59.8601  20
   2   6  -4 684.499 66.4521  29
  -2   6   4 759.138 63.2893  24
  -2   6   4 657.334 59.6388  18
  -2   6   3 311.042 43.8318  18
   2   6  -3 316.016 45.6919  29
  -2   6   3 370.065 47.4510  24
  -2   6   2 403.550 47.4337  24
   2   6  -2 415.916 51.0723  29
   2   6  -1 849.831 69.8931  29
  -2   6   1 694.669 59.5996  24
  -2   6   0-4.56495 21.5979  24
   2   6   0 21.2273 23.0117  29
   2   6   1 756.026 65.7373  29
  -2   6  -1 675.312 58.9803  24
  -2   6  -2 106.364 29.6917  24
   2   6   2 174.149 38.0598  29
   2   6   3 2075.77 100.754  31
   2   6   3 2257.55 111.679  29
   2   6   4 215.847 37.2271  31
   2   6   4 204.801 39.8258  29
   2   6   5 185.146 34.5741  31
   2   6   5 196.641 37.6750  29
   2   6   6 135.717 33.1804  31
   2   6   6 155.166 34.8443  29
  -2   6  -7 62.3734 25.5126  20
   2   6   7 80.2966 27.3680  31
   2   6   8 325.085 39.9582  31
  -2   6  -8 341.431 40.2779  20
  -2   6  -9 1385.76 71.2492  20
   2   6   9 1260.65 70.3118  31
  -2   6 -10 165.299 26.8372  20
   2   6  10 163.813 26.0321  31
  -2   6 -11 100.202 18.6304  20
   2   7  -9 86.7251 21.7019  26
  -2   7   8 20.7556 16.8372  28
   2   7  -8 86.9827 24.3203  26
   2   7  -7 63.1845 25.0773  26
   2   7  -6 20.3818 20.8338  20
   2   7  -6 26.6371 23.3915  26
  -2   7   6 37.7395 22.8682  24
  -2   7   5 337.713 42.0026  24
   2   7  -4 376.515 47.8352  29
  -2   7   4 379.664 46.0522  24
   2   7  -3 60.7351 26.2339  29
  -2   7   3 13.0868 21.0507  24
   2   7  -2 20.6503 24.4319  29
  -2   7   2 92.2976 29.4131  24
   2   7  -1 15.6039 23.0885  29
  -2   7   1 61.2074 25.8384  24
   2   7   0 655.054 61.8450  29
  -2   7   0 581.200 53.5799  24
   2   7   1 5.15252 21.8041  29
   2   7   2 96.3254 29.2013  29
   2   7   3 73.9476 26.4019  29
   2   7   4 162.500 32.2083  31
   2   7   4 136.886 32.5618  29
   2   7   5 494.396 48.5978  31
   2   7   5 567.130 54.5164  29
  -2   7  -6 36.5450 19.6329  20
   2   7   6 8.07577 17.9219  29
   2   7   6 3.71512 18.2673  31
   2   7   7 13.3251 17.5510  31
  -2   7  -7 15.1787 18.8368  20
   2   7   7 3.53557 16.7279  29
  -2   7  -8 131.063 23.5638  20
   2   7   8 121.159 24.3222  31
   2   7   8 81.7840 21.4452  29
  -2   7  -9 77.3231 18.0283  20
   2   7   9 43.3970 16.5673  31
   2   8  -7 220.966 25.1297  26
  -2   8   6 46.9012 16.0193  31
   2   8  -6 38.7526 17.6354  26
   2   8  -5 228.834 31.2060  26
  -2   8   4 309.748 33.8914  24
  -2   8   3 672.484 47.9514  24
   2   8  -2 495.361 46.5452  29
  -2   8   2 536.770 43.3617  24
   2   8  -1 166.000 31.0549  29
   2   8   0 38.8919 22.6901  29
   2   8   1 345.108 40.2729  29
   2   8   2 166.663 30.0039  29
   2   8   3 811.382 55.9606  29
   2   8   4 1101.50 62.0554  29
   2   8   5 1431.39 66.4467  29
   2   8   5 1524.62 62.7964  31
   2   8   6 39.4618 16.7370  27
   2   8   6 35.2477 15.8886  29
   2   8   6 70.8026 17.0737  31
   2   8   7 138.661 18.6238  31
   2   8   7 108.067 17.9836  27
   3   0 -15 81.2534 15.7845   6
   3   0 -14-2.68720 15.4669   6
   3   0 -13 1171.43 68.5517   6
   3   0 -12-4.34129 22.8719   6
   3   0 -11 870.110 68.9617   6
   3   0 -10-19.4172 26.7844   6
   3   0  -9 5079.21 165.496   6
  -3   0   8 10.7863 27.0039   3
   3   0  -7 3460.88 179.928  15
  -3   0   7 3621.62 188.536   3
  -3   0   6 8.54933 26.8309   3
   3   0  -6 16.2113 25.4386  15
  -3   0   5 1266.91 98.8897  13
  -3   0   5 1430.39 106.134   3
   3   0  -4-19.4343 31.2567  12
  -3   0   4 6.77552 21.2645   3
   3   0  -3 26237.8 482.460  12
  -3   0   3 26178.2 490.996   3
   3   0  -2 5.45695 19.3205  12
  -3   0   2 11.4266 24.1771   3
   3   0  -2 5.81625 22.0144  14
  -3   0   1 1088.23 77.5789   3
   3   0  -1 1114.08 82.2300  14
   3   0   0 16.3621 23.6506  14
  -3   0  -1 5107.75 173.237   1
  -3   0  -1 5157.38 168.330   9
  -3   0  -2 5.70913 22.2744   1
  -3   0  -2-21.0580 27.7362   9
  -3   0  -3 3887.17 155.831   9
  -3   0  -3 4306.55 167.300   1
  -3   0  -4 6.55725 21.4941  10
  -3   0  -4 12.6724 22.4337   9
  -3   0  -5 11799.2 316.586  10
  -3   0  -6-8.41084 23.8762  10
  -3   0  -7 2797.18 165.904  10
  -3   0  -8 4.23685 21.2141   6
  -3   0  -9 596.877 59.2216   6
  -3   0 -10-4.64925 24.4944   6
  -3   0 -11 2666.67 112.974   6
  -3   0 -12 37.0450 24.6367   6
   3   0  13 105.077 26.9525   5
   3   0  14 5.19029 14.1066   5
   3   1 -14 660.377 44.2456   6
   3  -1 -14 661.687 43.9306   6
   3   1 -13 587.107 49.4121   6
   3  -1 -13 627.376 50.6801   6
   3  -1 -13 619.116 46.8357  21
   3  -1 -12 534.150 48.2924  21
   3   1 -12 415.187 46.5622   6
   3  -1 -12 394.846 46.6506   6
   3  -1 -11 317.104 42.7065  21
   3   1 -11 394.555 48.0721   6
   3  -1 -11 313.597 45.3071   6
   3  -1 -10 35.2313 23.9460  21
   3   1 -10 43.0332 26.3884   6
   3  -1 -10 90.3751 30.1987   6
   3   1  -9 1005.96 72.1424   6
   3  -1  -9 998.480 72.7444   6
   3  -1  -9 833.471 65.7090  21
  -3  -1   8 32.3485 32.2717   3
  -3   1   8 75.3004 38.0914   3
   3  -1  -8 53.4132 26.6614  21
   3  -1  -8 75.5315 38.2083  15
  -3   1   7 1629.87 127.037  13
   3  -1  -7 1500.88 78.1800  21
   3  -1  -7 1551.77 125.423  15
  -3  -1   7 1505.64 122.370   3
  -3   1   7 1304.56 115.128   3
  -3   1   6 1777.28 126.204  13
  -3  -1   6 1715.45 123.548   3
  -3   1   6 1871.02 127.563   3
   3  -1  -6 1976.63 131.544  15
  -3   1   5 2309.69 137.011  13
  -3  -1   5 2005.03 124.023   3
  -3   1   5 2165.37 128.837   3
   3  -1  -4 774.128 77.6885  12
  -3  -1   4 856.148 78.2866   3
  -3   1   4 893.267 80.4782   3
  -3   1   3 2536.93 130.757   3
   3  -1  -3 2707.26 131.699  12
  -3  -1   3 2590.10 131.584   3
  -3  -1   2 679.509 63.6878   3
   3  -1  -2 672.696 65.5480  12
   3   1  -2 676.990 60.6259  12
  -3   1   2 670.315 63.8122   3
   3   1  -2 645.415 63.4199  14
   3  -1  -2 581.220 61.4234  14
   3  -1  -1 379.692 48.7843  14
  -3  -1   1 450.357 52.0653   3
  -3   1   1 428.411 52.3281   3
   3   1  -1 381.247 48.1468  14
   3   1   0 97.6523 31.2441  14
   3  -1   0 89.4280 29.9371  14
  -3  -1  -1 1237.11 86.7969   9
  -3  -1  -1 1129.72 79.3077   1
  -3   1  -1 1285.73 86.4236   1
  -3   1  -2 164.509 38.9413   1
  -3  -1  -2 102.116 33.1210   1
  -3  -1  -2 109.342 34.5163   9
  -3  -1  -3 14329.1 338.335   9
  -3   1  -3 14845.9 339.346   1
  -3  -1  -3 13828.4 331.898   1
  -3  -1  -4 4293.45 179.782   9
  -3  -1  -5 804.654 82.8925   9
  -3   1  -5 830.863 83.5718  10
  -3   1  -6 1452.96 115.158  10
  -3  -1  -6 1265.66 108.226   9
   3   1   7 1085.39 70.7284  23
  -3   1  -7 1009.49 103.539  10
  -3  -1  -7 818.309 92.7739   9
  -3   1  -7 976.602 64.8400   6
   3   1   7 979.922 67.0245  30
  -3  -1  -7 1125.52 67.7092   6
   3   1   8 133.256 33.4234  23
  -3  -1  -8 103.771 31.2028   6
  -3   1  -8 106.827 28.6210   6
   3   1   8 123.858 33.5112  30
  -3   1  -8 101.399 45.2493  10
   3   1   9 5356.63 169.146  23
   3   1   9 5470.45 167.037  30
  -3  -1  -9 5443.51 163.842   6
  -3   1  -9 5415.10 166.212   6
   3   1  10 334.792 47.1709  23
  -3  -1 -10 260.428 41.1111   6
  -3   1 -10 319.847 43.9913   6
   3   1  10 269.909 40.0162  30
   3   1  11 641.816 58.8305  23
  -3  -1 -11 657.780 56.7472   6
  -3   1 -11 573.446 53.2598   6
   3   1  12 571.055 53.2949  23
   3   1  12 630.636 53.7718   5
  -3   1 -12 572.925 51.5284   6
   3   1  13 281.605 35.5624  23
   3   1  13 210.131 32.4850   5
   3  -1  13 217.946 32.6551   5
   3   1  14 39.2637 15.9184   5
   3  -1  14 49.8409 18.4240   5
   3  -2 -14 139.613 21.2536  21
   3  -2 -13 1249.25 63.9156  21
   3  -2 -12 26.0567 22.8286  21
   3   2 -12 22.1326 21.7997   6
   3   2 -11 664.453 57.0310   6
   3  -2 -11 696.978 59.4811  21
   3  -2 -10 1340.82 81.9076  21
   3  -2  -9 10714.1 247.312  21
  -3   2   8 2276.37 163.001  13
   3  -2  -8 2393.62 105.847  21
   3  -2  -8 2273.53 165.183  15
  -3   2   7 1372.26 123.258  13
   3  -2  -7 1388.34 78.1306  21
   3  -2  -7 1623.73 131.786  15
  -3   2   6 581.141 79.4411  13
   3  -2  -6 743.281 89.1235  15
  -3   2   5 2733.04 157.929  13
  -3   2   4 690.336 79.3051  13
   3  -2  -4 664.517 74.2516  12
   3  -2  -3 8262.21 256.221  12
   3  -2  -2 6523.10 212.594  12
  -3   2   2 6350.76 203.645   3
  -3   2   2 6245.42 205.767  16
   3  -2  -1 10943.6 283.366  12
  -3   2   1 11389.4 288.678  16
  -3   2   0 10723.8 271.064   1
  -3  -2  -1 2672.54 137.819   9
  -3   2  -1 3183.84 140.425   1
  -3  -2  -2 3538.08 160.345   9
  -3   2  -2 3511.65 150.645   1
  -3  -2  -3 18998.3 427.909   9
  -3  -2  -4 487.626 66.5959   9
  -3   2  -5 911.488 88.0216  10
  -3  -2  -5 565.736 77.6658   9
  -3   2  -6 831.509 90.8570  10
  -3  -2  -6 694.087 85.0500   9
   3   2   7 2906.60 116.521  23
  -3   2  -7 2474.68 162.813  10
  -3  -2  -7 2725.04 176.115   9
   3   2   7 2591.16 108.910  30
   3   2   7 2584.40 107.544  31
   3   2   8 2453.44 112.362  23
   3   2   8 2503.56 111.578  30
   3   2   8 2455.79 107.185  31
  -3   2  -8 2730.95 109.940   6
   3   2   9 14189.6 305.699  23
   3   2   9 14455.4 307.139  30
  -3   2  -9 14352.2 295.302   6
   3   2  10 919.455 71.9208  23
   3   2  10 910.157 69.9030  30
  -3   2 -10 1021.68 69.5902   6
   3   2  11 2878.53 120.628  23
   3   2  11 2932.65 118.026  30
   3  -2  11 2922.50 116.261   5
   3   2  12 65.7163 26.3676  23
   3  -2  12 51.9058 22.7457   5
   3   2  13 4186.70 124.968  23
   3  -2  13 3892.13 116.333   5
   3   2  14 266.636 27.6664  23
   3  -2  14 312.468 27.7502   5
   3  -3 -14 11.4058 11.8435  21
   3  -3 -13 562.641 41.8097  21
   3  -3 -12 232.821 32.6648  21
   3  -3 -11 181.216 34.8319  21
   3  -3 -10 661.627 57.9341  21
   3   3  -9 2289.66 116.166  26
   3  -3  -9 2665.45 113.331  21
   3  -3  -8 145.386 35.4128  21
  -3   3   7 199.298 54.3966  13
   3  -3  -7 189.044 37.1530  21
   3  -3  -7 255.894 60.5234  15
   3  -3  -6 194.557 51.2973  15
  -3   3   6 108.423 44.7497  13
   3  -3  -6 164.940 32.6488  21
   3   3  -6 190.788 33.7450  20
  -3   3   6 86.6469 28.7425  18
  -3   3   5 1852.82 136.624  13
   3   3  -5 1792.52 86.1003  20
  -3   3   5 1939.59 93.1423  18
   3  -3  -5 1585.13 125.049  15
  -3   3   4 865.667 91.5211  13
  -3   3   3 602.563 71.5590  16
  -3   3   3 441.235 64.0014  13
  -3   3   2 118.085 40.1375  16
  -3   3   1 1688.60 115.049  16
  -3  -3   0 2057.51 128.512   9
  -3   3   0 2272.05 132.457  16
  -3  -3  -1 503.151 67.1755   9
  -3   3  -1 452.593 63.0995  16
  -3  -3  -2 255.355 49.4026   9
  -3   3  -2 316.847 56.5844  16
  -3  -3  -3 359.953 60.0650   9
  -3   3  -3 401.341 59.8927  16
  -3   3  -4 397.687 62.5397  10
  -3  -3  -4 588.417 76.3959   9
  -3   3  -4 475.644 67.2036  16
  -3   3  -5 467.328 68.7624  10
   3   3   5 498.409 48.7308  31
  -3  -3  -5 638.258 82.2937   9
   3   3   6 1011.24 69.5379  23
  -3  -3  -6 1005.55 107.289   9
   3   3   6 800.369 62.0000  31
   3   3   6 917.735 65.3482  30
   3   3   7 252.861 39.5434  23
   3   3   7 333.588 44.6612  30
   3   3   7 360.856 45.0592  31
   3   3   8 439.947 51.3983  23
   3   3   8 440.062 50.5107  30
   3   3   9 503.624 54.9681  23
   3   3   9 492.984 54.2060  30
   3   3   9 461.661 50.2550  31
   3   3  10 42.8082 27.0066  23
   3   3  10 18.6005 23.2858  30
   3   3  11 1029.99 69.6735  23
   3   3  11 968.980 66.4603  30
   3   3  12 119.294 28.0327  23
   3   3  13 74.0400 22.0341  23
   3   3  14 22.3338 12.4893  23
   3  -4 -13 157.026 20.2330  21
   3  -4 -12 28.0543 18.5396  21
   3  -4 -11 151.538 29.0003  21
  -3   4  11 165.055 29.8530  28
   3  -4 -10 227.917 36.4924  21
  -3   4  10 223.836 35.5749  28
  -3   4   9 696.952 59.4175  28
   3   4  -9 686.636 65.8386  26
   3   4  -8 10.9467 25.3726  26
  -3   4   7 1771.88 94.5091  18
   3   4  -7 1750.19 101.286  26
   3   4  -6 75.9442 27.4075  20
  -3   4   6 67.3423 28.4365  18
   3   4  -5 1625.93 87.1105  20
  -3   4   5 1712.46 92.5822  18
   3   4  -4 178.630 33.4231  20
  -3   4   4 195.256 36.0127  18
   3  -4  -3 950.796 63.8166  22
  -3   4   3 1048.10 69.3791  18
  -3   4   3 828.453 94.3199  16
   3  -4  -2 857.472 59.3960  22
  -3   4   2 909.390 63.0066  18
  -3   4   2 820.268 92.1404  16
  -3   4   2 789.460 59.3310  24
  -3   4   1 242.454 55.8897  16
  -3   4   0 307.386 59.0119  16
  -3   4  -1 1697.94 127.787  16
  -3   4  -1 1841.26 87.3121  24
  -3   4  -2 1595.17 124.433  16
   3   4   3 446.494 45.8802  31
  -3   4  -3 409.699 65.4593  16
   3   4   4 21.5970 22.0116  31
   3   4   5 209.616 38.8819  31
   3   4   6 606.050 56.9217  31
   3   4   7 4091.46 145.006  31
   3   4   8 84.8627 27.5300  31
   3   4   8 156.024 36.0920  30
   3   4   9 3213.74 124.437  23
   3   4   9 3168.11 123.829  30
   3   4   9 3306.69 125.489  31
   3   4  10 218.583 36.2085  23
   3   4  10 203.885 33.4423  31
   3   4  10 184.256 33.8562  30
   3   4  11 20.7694 19.6543  23
   3   4  12 244.841 29.3855  23
   3   4  13 14.1691 13.1972  23
  -3   5  11 30.6307 18.0781  28
  -3   5  10 937.090 59.1039  28
  -3   5   9 78.1482 25.6291  28
   3   5  -9 64.0824 26.7122  26
  -3   5   8 12.9519 20.8335  18
  -3   5   8 43.2544 25.5626  28
   3   5  -8 45.4441 27.0301  26
  -3   5   7 70.7845 26.8116  18
  -3   5   7 91.2395 29.9250  28
   3   5  -7 117.230 33.0797  26
  -3   5   6 433.607 51.3211  18
  -3   5   6 445.011 49.4920  28
   3   5  -6 430.484 55.2820  26
  -3   5   5 94.7557 30.2333  18
  -3   5   5 81.9623 26.9264  24
  -3   5   4 3370.13 134.602  18
  -3   5   4 3567.94 132.239  24
  -3   5   3 278.523 41.2539  18
  -3   5   3 238.225 40.0761  24
  -3   5   2 489.653 52.0604  18
  -3   5   2 547.225 52.6551  24
  -3   5   1-4.53611 23.8988  24
  -3   5   1-23.4728 36.8329  16
  -3   5   0 1146.16 116.266  16
  -3   5   0 1254.33 79.3219  24
  -3   5  -1-4.53939 20.1475  24
  -3   5  -1-22.8310 32.4057  16
  -3   5  -2 82.2431 28.0350  24
  -3   5  -3 791.523 63.3078  24
   3   5   4 729.690 60.9762  31
  -3   5  -4 945.706 69.1171  24
   3   5   5 57.0141 28.0836  31
   3   5   6 76.3784 26.7375  31
   3   5   7 4.64871 21.5497  31
   3   5   8 247.299 37.0573  31
   3   5   9 344.253 39.8457  31
  -3   5 -10 1117.34 60.6970  20
   3   5  10 1237.67 64.3268  31
  -3   6  10 41.3381 17.5962  28
  -3   6   9 549.509 43.2342  28
   3   6  -9 579.343 48.5246  26
  -3   6   8 83.2421 24.4263  28
   3   6  -8 95.4608 27.6762  26
  -3   6   7 51.9074 22.6794  18
  -3   6   7 40.7115 22.9746  28
   3   6  -7 71.8624 26.8875  26
  -3   6   7 77.1766 24.8436  24
  -3   6   6 170.964 33.5254  18
  -3   6   6 282.500 39.1864  28
   3   6  -6 219.127 39.1687  26
  -3   6   6 171.561 33.3330  24
  -3   6   5 609.346 57.0145  18
  -3   6   5 563.458 52.7100  24
  -3   6   4 4217.28 148.557  18
  -3   6   4 4395.02 148.889  24
  -3   6   3 785.674 64.4883  18
   3   6  -3 677.481 65.1203  29
  -3   6   3 661.231 60.4791  24
   3   6  -2 9193.04 238.813  29
  -3   6   2 9338.68 231.610  24
  -3   6   1 3580.06 134.919  24
   3   6   0 184.060 38.1546  27
  -3   6   0 259.997 41.0735  24
  -3   6  -1 778.935 64.2007  24
  -3   6  -2 1935.59 98.4465  24
  -3   6  -3 3319.35 126.487  24
   3   6   4 8245.42 207.099  31
  -3   6  -4 8232.32 207.812  24
  -3   6  -5 148.635 31.0506  24
   3   6   5 129.797 32.0152  31
   3   6   6 141.721 30.8538  31
   3   6   6 161.014 32.9878  27
   3   6   7 273.829 36.6296  31
   3   6   8 88.2057 24.6873  31
  -3   6  -8 124.707 26.4052  20
  -3   6  -9 264.404 30.3982  20
   3   6   9 292.562 32.9789  31
  -3   6 -10-1.96544 12.3364  20
   3   7  -8 30.8581 16.5091  26
   3   7  -7 50.7813 22.9704  26
   3   7  -6 115.181 27.0512  26
  -3   7   6 65.6156 21.1416  24
   3   7  -5 93.4384 28.0754  26
  -3   7   5 87.6723 25.1453  24
  -3   7   4 906.518 61.0473  24
  -3   7   3 576.330 51.4075  24
   3   7  -2 253.573 39.1860  29
  -3   7   2 366.876 41.8269  24
   3   7  -1 610.151 55.4526  29
  -3   7   1 582.380 53.0550  24
   3   7   0 334.385 43.4601  29
  -3   7   0 379.251 43.2183  24
   3   7   1 245.457 36.1633  27
  -3   7  -1 186.029 33.3791  24
   3   7   2 867.459 63.7343  27
  -3   7  -2 812.674 59.1159  24
   3   7   3 82.7625 29.0494  27
  -3   7  -3 57.4802 22.3044  24
   3   7   4 98.4182 27.6492  27
   3   7   5 343.618 36.8276  31
   3   7   5 439.349 42.6536  27
  -3   7  -6 291.480 31.5064  20
   3   7   6 290.210 32.7944  31
   3   7   6 281.609 34.3056  27
  -3   7  -7 52.9412 17.5709  20
   3   7   7 67.4925 19.5149  31
   3   7   7 45.1590 16.6293  27
  -3   7  -8 70.8645 16.4846  20
   3   7   8 90.2542 18.0276  31
   3   8  -5 18.2284 13.0000  26
   3   8  -4 172.183 25.1853  26
  -3   8   4 195.034 24.6587  24
   3   8  -3 5.32236 17.8058  26
  -3   8   3-9.39714 14.0595  24
  -3   8   2 263.415 29.3375  24
  -3   8   1 53.3225 18.1501  24
   3   8   0 31.0490 17.9194  29
  -3   8   0 22.5709 15.1979  24
   3   8   1 8.21750 16.1866  29
  -3   8  -1 4.78153 13.3838  24
   3   8   2 404.735 34.7839  27
   3   8   3-2.44424 15.1663  27
   3   8   4 326.253 30.1376  27
   3   8   5-5.35784 12.7587  19
   3   8   5 1.88943 11.4478  27
   4   0 -13 33.2871 17.4759   6
   4   0 -12 442.815 42.9021   6
   4   0 -11 41.2952 24.0922   6
   4   0 -10 9585.56 233.104   6
   4   0  -9-4.82125 24.9875   6
   4   0  -8 4954.13 153.887  21
   4   0  -7 20.7739 22.5856  21
  -4   0   6 1374.14 127.105   3
   4   0  -5 28.9146 31.5941  12
  -4   0   5 20.4103 32.0284   3
   4   0  -4 5492.06 229.647  12
  -4   0   4 5397.10 232.817   3
   4   0  -3 8.40946 27.5651  12
  -4   0   3-8.92765 25.3431   3
   4   0  -2 23824.2 504.559  12
  -4   0   2 22942.6 503.968   3
   4   0  -2 23951.1 517.116  14
   4   0  -1-16.7693 25.0899  14
  -4   0   0 2650.19 151.330   1
   4   0   0 2657.70 149.127  14
   4   0   1 8.40035 22.4825  14
  -4   0  -1-16.4443 30.1324   1
  -4   0  -2 9013.98 287.752   1
  -4   0  -3 18.0017 30.7091   1
  -4   0  -4 964.433 98.9825  10
   4   0   5 33.3533 24.3218   5
   4   0   6 8020.70 204.812   5
   4   0   7 46.2353 26.9744   5
   4   0   8 2980.42 124.735   5
   4   0   9 14.1840 24.0929   5
   4   0  10 3950.48 139.415   5
   4   0  11 11.9907 20.0131   5
   4   0  12 2968.51 104.468   5
   4   0  13 12.2091 16.1744   5
   4   1 -13 101.926 21.4373   6
   4  -1 -13 129.429 22.3068   6
   4  -1 -12 273.974 33.1224  21
   4   1 -12 266.578 34.3984   6
   4  -1 -12 278.269 34.6465   6
   4  -1 -11 194.253 32.3591  21
   4   1 -11 194.074 34.0012   6
   4  -1 -11 154.176 33.3131   6
   4  -1 -10 833.305 65.2522   6
   4  -1 -10 903.858 64.7745  21
   4   1  -9 1204.93 79.0314   6
   4  -1  -9 1287.00 80.4010   6
   4  -1  -9 1168.36 75.5409  21
   4  -1  -8 80.2864 31.3142  21
   4  -1  -7 174.657 35.8378  21
  -4   1   6 316.738 63.4333  13
   4  -1  -6 402.189 46.0384  21
  -4  -1   6 229.631 56.7933   3
  -4   1   6 374.844 69.2978   3
   4  -1  -6 255.793 60.5664  15
  -4  -1   5 884.298 97.1568   3
  -4   1   5 858.313 97.8701  13
  -4   1   5 821.552 95.7155   3
   4  -1  -4 145.135 44.8722  12
  -4  -1   4 75.7496 35.8631   3
  -4   1   4 153.568 48.9261   3
   4  -1  -3 1034.28 97.8221  12
  -4  -1   3 1217.06 105.388   3
  -4   1   3 1002.07 99.6599   3
   4  -1  -2 662.999 82.6258  12
   4  -1  -2 640.474 80.4107  14
   4  -1  -1 631.066 74.6995  14
   4   1  -1 541.955 71.3230  14
   4  -1   0 177.660 43.1864  14
  -4  -1   0 202.453 44.0948   1
  -4   1   0 274.176 52.2124   1
  -4  -1   0 211.000 48.6469   9
   4   1   0 288.585 52.4010  14
   4   1   1 16.6594 32.5089  14
   4  -1   1 102.776 35.3355  14
  -4  -1  -1 110.547 44.0804   9
  -4  -1  -1 65.2464 33.6497   1
  -4   1  -1 100.612 38.0575   1
  -4   1  -2 3593.21 179.327   1
  -4  -1  -2 3684.49 177.369   1
  -4  -1  -2 3392.24 176.355   9
  -4  -1  -3 3008.44 167.792   9
  -4   1  -3 2963.25 165.113   1
  -4  -1  -3 3321.69 173.880   1
   4   1   4 756.085 59.6926  23
  -4   1  -4 710.209 84.8091  10
  -4  -1  -4 760.615 87.4721   9
   4  -1   4 748.550 57.2113   5
   4   1   5 841.239 64.4650  23
  -4   1  -5 791.419 91.8485  10
  -4  -1  -5 846.987 96.3784   9
   4   1   5 811.359 61.7638   5
   4  -1   5 763.787 60.7405   5
   4   1   6 211.528 39.3236  23
   4   1   6 151.105 31.9565   5
   4  -1   6 111.246 31.2781   5
  -4   1  -6 191.076 51.0376  10
   4   1   7 200.453 39.8622  23
   4   1   7 171.045 34.6774   5
   4  -1   7 232.397 38.6606   5
   4   1   8 1259.05 78.5104   5
   4  -1   8 1202.49 77.8257   5
   4   1   9 2350.25 110.882  23
   4  -1   9 2513.44 111.776   5
   4   1   9 2233.18 104.292   5
   4   1  10 390.774 46.6890  23
   4   1  10 322.912 42.3669   5
   4  -1  10 367.297 45.4799   5
   4   1  11 404.299 45.1449  23
   4   1  11 451.923 45.1369   5
   4  -1  11 489.273 46.8388   5
   4   1  12 85.3724 23.9661  23
   4   1  12 135.922 26.5325   5
   4  -1  12 99.1913 24.9963   5
   4   1  13 49.3721 17.2464   5
   4  -1  13 58.6398 18.8431   5
   4  -2 -13 220.336 24.4631  21
   4  -2 -12 208.772 29.5465  21
   4  -2 -11 98.0779 27.3551  21
   4  -2 -10 1466.45 80.9841  21
   4  -2  -9 43.9544 26.3096  21
   4  -2  -8 104.087 33.4667  21
   4  -2  -7 2038.43 100.489  21
  -4   2   6 473.456 78.0592  13
   4  -2  -6 437.858 48.6032  21
   4  -2  -6 340.781 68.7132  15
  -4   2   5 11.6017 32.9340  13
  -4   2   5 4.48156 23.2270  18
  -4   2   4 3911.83 208.371  13
   4  -2  -4 4015.46 210.362  12
   4  -2  -4 3852.20 128.561  22
  -4   2   4 4331.78 142.733  18
   4  -2  -3 1345.58 116.394  12
   4  -2  -3 1381.91 73.1834  22
   4   2  -3 1343.33 78.7057  19
  -4   2   3 1371.51 77.9345  18
   4  -2  -2 360.309 60.7080  12
   4  -2  -1 1238.99 106.929  12
  -4   2   1 1071.06 101.244  16
  -4  -2   0 606.850 79.5607   9
  -4   2   0 670.923 79.0594   1
  -4   2   0 585.538 73.6716  16
  -4   2  -1 4632.38 203.781   1
  -4  -2  -1 4965.97 220.647   9
  -4  -2  -2 1382.08 116.714   9
  -4   2  -2 1480.61 115.354   1
   4   2   3 693.719 56.8514  23
  -4  -2  -3 813.489 92.3001   9
   4   2   4 1434.67 84.7215  23
  -4   2  -4 1197.68 115.209  10
  -4  -2  -4 1197.75 115.262   9
   4   2   5 294.556 42.7838  23
  -4   2  -5 233.483 59.5983  10
  -4  -2  -5 289.547 63.0367   9
   4   2   6 205.073 38.1720  23
   4   2   7 5174.35 173.617  23
   4  -2   7 5800.02 171.150   5
   4   2   8 1175.94 80.2742  23
   4  -2   8 1111.48 74.6910   5
   4   2   9 78.0424 29.1945  23
   4  -2   9 17.6221 24.3122   5
   4   2  10 223.708 40.4883  23
   4  -2  10 275.032 39.8766   5
   4   2  11 749.884 56.8799  23
   4  -2  11 715.066 53.6257   5
   4   2  12 133.313 25.1915  23
   4  -2  12 98.2054 22.8348   5
   4   2  13 68.5416 17.9133  23
   4  -2  13 33.1357 14.2682   5
   4  -3 -12 120.924 22.2668  21
   4  -3 -11 538.103 44.9655  21
   4  -3 -10 201.022 34.3149  21
   4  -3  -9 502.823 50.7658  21
   4  -3  -8-17.3330 23.1956  21
   4  -3  -7 1201.81 76.8100  21
   4  -3  -6 39.0832 25.6658  21
  -4   3   6 43.2013 25.6983  18
  -4   3   5 1016.13 72.9917  18
  -4   3   4 1083.81 116.351  13
   4  -3  -4 1025.78 70.4006  22
  -4   3   4 1217.19 79.5440  18
  -4   3   3 344.436 68.2786  13
   4  -3  -3 367.283 43.9113  22
  -4   3   3 424.095 47.3878  18
   4  -3  -2 150.154 30.9183  22
  -4  -3   2 183.115 51.0140   9
   4   3  -2 224.815 38.6559  19
  -4   3   2 236.538 37.3680  18
   4   3  -2 221.771 36.9002  27
   4  -3  -1 170.519 32.2097  22
  -4  -3   1 137.800 50.1708   9
   4   3  -1 124.203 33.4645  19
  -4   3   1 124.873 29.4155  18
   4   3  -1 112.492 30.4397  27
  -4   3   1 71.3656 34.8116  16
   4  -3   0 230.042 34.3438  22
  -4  -3   0 243.554 62.6398   9
   4   3   0 331.581 43.4520  19
   4   3   0 232.414 38.4326  27
  -4   3   0 195.803 52.5899  16
   4  -3   1 462.435 44.8881  22
  -4  -3  -1 622.617 83.9635   9
   4   3   1 535.291 53.0794  27
  -4   3  -1 473.856 72.7715  16
  -4  -3  -2 254.417 61.9801   9
   4   3   2 219.513 37.8527  27
  -4   3  -2 236.444 55.7647  16
  -4  -3  -3 825.860 99.2456   9
   4   3   3 772.137 63.5739  27
  -4   3  -3 617.180 84.5059  16
   4   3   4 1158.71 75.0869  23
   4   3   4 1353.27 80.4164  31
  -4   3  -4 1025.43 110.648  16
   4   3   5 1093.64 74.8648  23
   4   3   5 1100.17 73.6639  31
   4   3   6 136.743 35.5672  23
   4   3   6 276.783 41.2006  31
   4   3   7 1167.24 78.7154  23
   4   3   8 14.4485 25.3742  23
   4   3   9 3116.72 122.565  23
   4   3  10 48.1058 26.0114  23
   4   3  11 166.090 30.0452  23
   4   3  12 27.4166 16.1716  23
   4  -4 -11 98.2774 20.6308  21
   4  -4 -10 380.823 38.5162  21
  -4   4  10 451.405 40.6470  28
   4  -4  -9 148.119 29.1009  21
  -4   4   9 249.957 35.5435  28
  -4   4   7 160.684 35.3404  18
  -4   4   6 607.992 58.4543  18
  -4   4   5 890.459 69.4581  18
  -4   4   4 2594.40 118.065  18
   4  -4  -3 2366.66 105.022  22
  -4   4   3 2525.38 114.233  18
   4  -4  -2 1980.16 99.1489  22
   4   4  -2 2347.60 112.267  19
  -4   4   2 2124.73 104.403  18
   4  -4  -1 1742.60 88.7855  22
  -4   4   1 1521.15 86.2203  18
   4   4  -1 1608.82 92.0732  27
  -4   4   0 91.8837 28.1104  24
   4   4   0 93.9039 31.0485  27
   4  -4   0 162.747 32.1055  22
  -4   4  -1 276.231 40.7631  24
   4  -4   1 273.306 41.3883  22
   4   4   1 221.221 41.0318  27
   4  -4   2 16198.3 312.623  22
   4   4   2 15999.8 333.186  27
  -4   4  -2 16229.3 323.450  24
   4   4   3 3729.60 143.419  27
   4   4   4 3320.16 127.775  31
   4   4   4 3249.14 132.083  27
   4   4   5 121.798 34.0769  31
   4   4   6 525.626 53.9975  31
   4   4   7 933.990 68.8708  31
   4   4   8 2608.94 107.864  23
   4   4   9 1171.75 69.2901  23
   4   4  10 1878.76 79.4233  23
   4   4  11 116.174 22.1356  23
  -4   5  10 31.2951 17.0570  28
  -4   5   9 218.168 30.2566  28
  -4   5   8-10.3398 18.7347  18
  -4   5   8 10.3659 20.1548  28
  -4   5   7 72.3723 24.6704  18
  -4   5   7 73.4897 27.8859  28
  -4   5   6 1290.88 79.2553  18
  -4   5   5 103.302 30.4836  18
  -4   5   4 255.041 41.0853  18
  -4   5   3 755.197 63.3373  18
   4  -5  -2 2831.15 113.731  22
   4   5  -2 3059.89 126.797  19
  -4   5   2 2784.44 118.908  18
  -4   5   2 2793.76 117.118  24
   4  -5  -1 252.273 38.8703  22
   4   5  -1 183.843 39.2053  27
  -4   5   1 266.007 41.0289  24
  -4   5   0-9.27957 26.3421  24
   4   5   0 30.0680 28.0536  27
   4   5   1 1632.62 94.1503  27
  -4   5  -1 1730.46 91.7817  24
   4   5   2 1477.99 91.1108  27
  -4   5  -2 1527.54 88.3656  24
  -4   5  -3 195.829 36.7184  24
   4   5   3 198.858 39.2625  27
  -4   5  -4 352.962 43.5709  24
   4   5   4 366.429 48.1896  27
   4   5   5 860.667 63.4376  31
   4   5   5 729.366 62.7200  27
  -4   5  -5 720.718 59.8247  24
   4   5   6 454.771 47.9987  31
  -4   5  -6 470.527 47.4163  24
  -4   5  -7 18.9336 18.9635  24
   4   5   7 46.6839 22.0899  31
  -4   5  -8 3.28336 16.1437  24
  -4   5  -9 165.035 24.6230  24
  -4   5 -10 38.5327 14.3616  20
  -4   6   9 23.6424 14.0246  28
  -4   6   8 76.3969 19.6220  28
  -4   6   7 212.615 30.4484  18
  -4   6   7 206.384 29.0173  28
  -4   6   6 6.84914 18.0424  18
  -4   6   6 8.95902 17.8721  28
  -4   6   5 206.861 34.4032  18
  -4   6   4 19.8063 21.2043  18
  -4   6   4 11.0051 18.3684  24
  -4   6   3 350.798 41.6858  18
  -4   6   3 431.266 44.2777  24
  -4   6   2 65.6402 25.7611  24
   4   6  -1 26.8530 24.3295  19
  -4   6   1 25.3082 23.6146  24
   4   6   0 87.9788 29.4480  27
  -4   6   0 76.8546 26.5098  24
   4   6   1 113.006 32.3203  27
  -4   6  -1 119.308 27.9662  24
  -4   6  -2 255.540 37.0990  24
   4   6   2 276.446 40.1143  27
  -4   6  -3 259.199 36.8675  24
   4   6   3 234.405 38.0029  27
  -4   6  -4 107.396 27.1940  24
   4   6   4 134.035 31.2378  27
  -4   6  -5 204.690 31.5996  24
   4   6   5 212.994 31.2713  31
   4   6   5 225.107 34.3380  27
  -4   6  -6 225.379 31.3090  24
   4   6   6 214.494 32.8467  27
  -4   6  -7 439.457 36.4358  24
  -4   6  -8 386.077 31.6821  20
  -4   6  -9 213.790 21.2813  20
  -4   7   5 100.614 19.3580  24
  -4   7   4 234.370 29.2325  24
  -4   7   3 386.352 36.4016  24
  -4   7   2 143.479 25.9755  24
   4   7  -1 21.9831 21.0135  19
  -4   7   1 15.5344 18.1237  24
   4   7   0 3.31779 19.0964  19
  -4   7   0 3.14445 18.3417  24
   4   7   1 10.0965 19.6338  19
   4   7   1 47.3602 20.7014  27
  -4   7  -1 31.0388 19.7049  24
   4   7   2 255.847 33.1223  19
   4   7   2 288.304 34.5663  27
  -4   7  -2 226.666 29.8758  24
   4   7   3 49.1022 23.0548  19
   4   7   3 27.4186 19.3448  27
  -4   7  -3 61.1711 20.5554  24
   4   7   4 134.213 24.4860  27
  -4   7  -4 194.357 26.7605  24
   4   7   5 202.630 26.1272  27
  -4   7  -5 198.395 24.0759  24
   4   7   6 199.259 23.6418  27
   5   0 -12-2.02224 14.3195   6
   5   0 -11 341.434 36.5330   6
   5   0 -10 3.55045 19.5896   6
   5   0  -9 197.476 35.7513   6
   5   0  -8-7.85508 22.9096  21
   5   0  -7 1967.33 96.2882  21
   5   0  -6 34.6431 25.2623  21
   5   0  -5 880.240 69.6006  19
   5   0  -4 25.0950 26.0125  19
   5   0  -4-4.70991 23.1579  25
   5   0  -3 453.301 54.6548  19
   5   0  -3 569.527 56.3967  25
   5   0  -2 10.9111 38.6309  12
   5   0  -2 15.0025 27.9948  19
   5   0  -2-9.47332 26.1344  25
   5   0  -2-4.57816 22.5099   5
   5   0  -1 3791.25 206.308  12
   5   0  -1 3848.80 145.502  19
   5   0  -1 3699.67 137.337   5
  -5   0   1 3885.27 216.124   1
   5   0  -1 3748.58 139.392  25
   5   0  -1 3957.69 218.085  14
   5   0   0 4.84303 24.6785  19
  -5   0   0-22.4958 39.8233   1
   5   0   0 4.64037 23.2345  25
   5   0   0 18.0923 23.4421   5
   5   0   0-11.4797 37.6289  14
  -5   0  -1 5062.79 242.254   1
   5   0   1 5307.16 166.958  19
   5   0   1 5210.25 162.511   5
   5   0   1 5327.97 165.114  25
   5   0   1 5393.65 252.242  14
   5   0   2 4.58271 22.5323   5
   5   0   3 200.030 38.1899   5
   5   0   4-9.57860 26.0334  23
   5   0   4 4.72575 23.6620   5
   5   0   5 1223.10 78.8982  23
   5   0   5 1300.41 80.9590   5
   5   0   6 14.3314 23.4888   5
   5   0   7 7926.34 209.185   5
   5   0   8 30.9349 22.1303   5
   5   0   9 44.0452 24.5598   5
   5   0  10-10.2792 19.4535   5
   5   0  11 401.927 36.5439   5
   5   0  12 1.89265 12.5363   5
   5   1 -12 599.717 36.1887   6
   5  -1 -12 541.467 34.2347   6
   5  -1 -11 66.4588 18.9355  21
   5   1 -11 42.3249 19.7199   6
   5  -1 -11 58.4908 20.1363   6
   5   1 -10 385.945 39.8556   6
   5  -1 -10 496.217 44.6593   6
   5  -1 -10 444.144 41.7845  21
   5   1  -9 451.512 46.2896   6
   5  -1  -9 510.442 50.1234   6
   5  -1  -9 495.290 47.5457  21
   5  -1  -8 364.186 43.6643  21
   5  -1  -7 21.7716 25.0637  21
   5  -1  -6 192.496 37.7153  21
  -5   1   5 895.067 67.4083  18
   5   1  -4 895.348 71.3079  19
  -5   1   4 1043.36 73.9637  18
   5   1  -4 954.877 70.0909  25
   5  -1  -3 86.8280 31.7197  19
   5   1  -3 110.515 31.5583  19
   5   1  -3 160.595 36.3345  25
   5  -1  -2 68.7912 40.6092  12
   5  -1  -2 121.265 35.7972  19
   5   1  -2 70.3381 31.5561  19
   5   1  -2 67.3757 30.0761   5
   5  -1  -2 110.040 33.5941  25
   5  -1  -2 137.577 33.9113   5
   5   1  -2 142.638 36.0106  25
   5  -1  -1 56.6665 37.1506  12
   5  -1  -1 29.7851 28.9581  19
   5   1  -1 69.8855 29.8757  19
   5  -1  -1 18.8510 22.7410  25
   5   1  -1 4.75608 25.4603  25
   5   1  -1 22.2525 23.0684   5
   5  -1  -1 13.6679 23.2181   5
   5  -1  -1 104.671 44.0209  14
  -5  -1   0 144.006 50.2965   1
   5  -1   0 158.855 51.5181  12
   5  -1   0 135.798 35.8808  19
  -5  -1   0 135.950 64.3419   9
   5   1   0 148.014 34.3464  19
   5  -1   0 124.792 32.1805  25
   5   1   0 151.582 34.1759  25
   5   1   0 141.929 32.2787   5
   5  -1   0 168.163 34.1749   5
   5   1   0 147.057 49.0793  14
   5  -1   0 115.850 49.0522  14
   5  -1   1 118.624 29.6088   5
   5   1   1 43.7053 27.1975  19
   5   1   1 56.8213 32.2706  14
   5  -1   1 58.3108 38.2360  14
   5   1   1 80.0924 26.6416   5
   5   1   2 115.373 46.3330  14
   5  -1   2 118.551 50.1817  14
   5   1   2 103.023 31.1696   5
   5  -1   2 96.7183 30.8396   5
   5   1   3 143.069 35.5844  23
   5   1   3 136.078 31.8673   5
   5  -1   3 116.798 35.9467   5
   5   1   4 224.444 42.2988  23
   5   1   4 225.039 40.8558   5
   5  -1   4 255.683 42.3535   5
   5   1   5 420.370 51.0626  23
   5  -1   5 377.347 47.2748   5
   5   1   6 970.235 73.4355  23
   5   1   6 963.601 69.5708   5
   5  -1   6 1008.03 71.6040   5
   5   1   7 287.149 42.8408  23
   5   1   7 280.536 39.8782   5
   5  -1   7 263.623 41.6396   5
   5   1   8 723.805 59.8704  23
   5   1   8 701.649 57.8195   5
   5  -1   8 653.304 57.3618   5
   5   1   9 886.215 60.5074   5
   5  -1   9 776.774 58.0653   5
   5   1  10 156.188 30.0424  23
   5   1  10 141.598 27.9803   5
   5  -1  10 136.820 27.2138   5
   5   1  11 12.6253 15.8519  23
   5   1  11 41.1624 16.5246   5
   5  -1  11 28.8300 17.8863   5
   5  -1  12 41.2963 15.2034   5
   5  -2 -11 1028.55 50.9483  21
   5  -2 -10 652.952 46.5550  21
   5  -2  -9 1005.24 63.1983  21
   5  -2  -8 15.8488 22.1813  21
   5  -2  -7 93.7819 28.2561  21
   5  -2  -6 689.171 58.3025  21
  -5   2   6 675.104 58.7372  18
   5  -2  -5 844.599 67.0806  21
  -5   2   5 747.039 64.5813  18
   5   2  -4 6091.78 184.831  19
  -5   2   4 5975.61 181.272  18
   5  -2  -3 1072.12 69.7784  22
   5   2  -3 1242.36 83.8614  19
  -5   2   3 1036.88 76.5947  18
   5   2  -3 1064.79 75.9196  25
   5  -2  -2 802.383 63.5347  22
   5   2  -2 981.184 73.5612  19
   5  -2  -1 2428.19 105.728  22
   5   2  -1 2347.63 114.953  19
  -5   2   1 2454.46 111.033  18
   5  -2   0 497.492 50.1047  22
   5   2   0 688.820 62.7389  19
  -5   2   0 575.577 55.6104  18
   5  -2   1 9940.74 227.032  22
   5   2   1 9503.70 241.121  19
   5   2   2 5779.74 179.870  19
   5   2   3 3924.71 146.444  23
   5  -2   3 4106.24 142.744   5
   5   2   4 1650.60 95.5311  23
   5  -2   4 1914.26 97.7004   5
   5   2   5 2264.21 109.635  23
   5  -2   5 2093.47 101.371   5
   5   2   6 14.7782 26.7839  23
   5  -2   6 107.617 32.0398   5
   5   2   7 231.053 39.2500  23
   5  -2   7 248.869 39.0415   5
   5   2   8 108.846 29.7281  23
   5  -2   8 83.1565 27.0416   5
   5   2   9 1678.69 83.9041  23
   5  -2   9 1510.66 76.0135   5
   5   2  10 101.436 25.1205  23
   5  -2  10 94.5425 23.9685   5
   5   2  11 283.894 30.2596  23
   5  -2  11 232.310 26.7629   5
   5  -3 -11 31.1072 14.4468  21
   5  -3 -10 4.84265 15.1979  21
   5  -3  -9 189.450 29.2387  21
   5  -3  -8 150.035 29.3961  21
   5  -3  -7 145.955 30.8848  21
  -5   3   7 146.282 32.6685  18
   5  -3  -6 1903.28 92.2098  21
  -5   3   6 2017.05 98.4373  18
   5  -3  -5 179.420 35.3616  21
  -5   3   5 138.835 35.4281  18
  -5   3   4 316.022 45.4460  18
   5  -3  -3 2096.42 99.8951  22
   5   3  -3 2067.27 105.458  19
  -5   3   3 1896.45 100.831  18
   5  -3  -2 501.745 49.7146  22
   5   3  -2 524.590 57.0542  19
  -5   3   2 503.573 53.3807  18
   5   3  -1 662.927 63.3314  19
  -5   3   1 565.677 56.1807  18
   5  -3   0 1400.81 80.4054  22
   5   3   0 1474.62 92.4027  19
  -5   3   0 1371.18 82.2998  18
   5  -3   1 5133.64 156.452  22
   5   3   1 4783.92 166.971  19
   5  -3   2 303.449 40.9749  22
   5   3   2 330.674 45.3032  19
   5  -3   3 246.761 40.4445  22
   5   3   4 682.470 60.8410  23
   5   3   5 1486.64 87.1655  23
   5   3   6 237.284 41.7291  23
   5   3   7 525.865 52.1591  23
   5   3   8 496.712 47.4293  23
   5   3   9 1010.65 60.3961  23
   5   3  10 39.3033 17.0036  23
   5   3  11 60.4547 15.8080  23
  -5   4  10 71.3988 15.6545  28
  -5   4   9 12.0754 15.8332  28
  -5   4   8 18.2042 17.2268  28
  -5   4   7 121.092 28.0284  18
  -5   4   6 174.608 32.6652  18
  -5   4   5 132.027 30.0676  18
  -5   4   4 926.128 67.6790  18
   5  -4  -3 152.286 32.2900  22
   5   4  -3 37.3240 28.9700  19
  -5   4   3 112.607 31.4129  18
   5  -4  -2-4.29814 23.3637  22
   5   4  -2-4.91748 26.3222  19
  -5   4   2-14.0206 21.6649  18
   5  -4  -1 56.0136 26.7440  22
   5   4  -1 45.5235 30.2785  19
  -5   4   1 73.0919 26.6554  18
   5  -4   0 502.833 50.7308  22
   5   4   0 398.006 50.4436  19
   5  -4   1 349.157 43.2207  22
   5   4   1 306.824 44.3343  27
   5  -4   2-4.20015 21.0304  22
   5   4   2-9.91295 25.2566  19
   5   4   2-4.98588 24.9646  27
   5  -4   3 845.129 62.4638  22
   5   4   3 847.815 66.8417  19
   5   4   3 828.102 66.4424  27
  -5   4  -3 770.027 59.9631  24
   5  -4   4 340.425 41.2251  22
   5   4   4 288.888 42.0340  27
  -5   4  -4 425.690 45.9942  24
   5  -4   5 172.740 31.2437  22
   5  -4   6 301.694 36.5566  22
   5   4   7 101.192 26.5355  23
   5  -4   7 92.6410 23.2193  22
   5   4   8 26.1323 18.8383  23
   5  -4   8 26.1395 16.7783  22
  -5   4  -9 64.9177 17.6342  24
   5  -4   9 47.1023 15.7557  22
  -5   4 -10 331.346 25.9670  24
  -5   5   8 244.936 25.2943  18
  -5   5   8 272.327 27.8367  28
  -5   5   7 123.286 24.6496  18
  -5   5   7 184.713 26.6494  28
  -5   5   6-6.37947 18.1097  18
  -5   5   6 23.5070 17.5850  28
  -5   5   5-14.2978 18.5263  18
  -5   5   4 241.308 36.7094  18
  -5   5   3 98.8971 27.2747  18
   5   5  -2 135.011 31.7432  19
  -5   5   2 193.864 33.1168  18
   5  -5  -1 3.76135 21.6496  22
   5   5  -1-17.7172 24.4387  19
   5  -5   0 487.430 45.8795  22
   5   5   0 428.968 48.6287  19
  -5   5  -1-3.86335 20.0228  24
   5  -5   1-3.68894 19.7460  22
   5   5   1 8.99631 23.3129  19
  -5   5  -2 111.812 28.2925  24
   5  -5   2 146.495 28.7206  22
   5   5   2 82.9452 29.8190  19
   5   5   2 130.839 30.9122  27
  -5   5  -3 94.3303 26.5075  24
   5  -5   3 132.743 27.9194  22
   5   5   3 94.5389 29.6468  19
   5   5   3 108.896 27.4855  27
   5  -5   4 1469.72 71.9407  22
   5   5   4 1447.09 77.7279  19
   5   5   4 1628.63 82.3329  27
  -5   5  -4 1633.72 79.3621  24
  -5   5  -5 127.493 26.0274  24
  -5   5  -6 21.0667 16.3608  24
  -5   5  -7 698.880 44.6274  24
  -5   5  -8 298.872 26.9469  24
  -5   6   6 33.3539 15.0873  18
  -5   6   5 7.00677 14.6599  18
  -5   6   4 7.74005 15.6323  18
  -5   6   3 59.3191 19.9385  18
   5   6  -2 143.631 27.7915  19
   5   6  -1 101.077 25.8496  19
  -5   6   1 136.654 25.3083  24
   5   6   0 16.9353 19.4977  19
  -5   6   0 38.4192 19.1741  24
   5   6   1 419.934 42.2690  19
  -5   6  -1 372.726 37.0646  24
   5   6   2 166.127 29.6200  19
  -5   6  -2 151.988 25.8608  24
   5   6   3 29.9730 21.4151  19
  -5   6  -3 27.8415 17.4782  24
   5   6   4 54.6084 19.9997  19
  -5   6  -4 53.7219 18.2862  24
  -5   6  -5 56.2047 17.1632  24
  -5   6  -6 380.096 29.0197  24
   5   7   0 3.61746 12.1021  19
  -5   7   0-1.65440 10.6174  24
   5   7   1 1.84172 12.3228  19
  -5   7  -1-3.30507 10.9459  24
   5   7   2 15.5431 11.5567  19
   6   0 -10 36.5614 15.1847   6
   6   0  -9-2.51512 14.4764   6
   6   0  -8 21.7089 19.9047   6
   6   0  -7-6.26389 18.9762  21
   6   0  -6 2758.45 103.362  21
   6   0  -5 30.8214 23.3456  21
  -6   0   4 1452.54 82.7863  18
   6   0  -3 24.8710 24.9076  19
   6   0  -2 2017.41 105.937  19
   6   0  -2 2026.82 103.053  25
   6   0  -1 10.1794 26.3791  19
   6   0  -1-14.0289 24.2366   5
   6   0   0 11079.5 263.715  19
   6   0   0 10735.8 252.573   5
   6   0   0 11111.7 261.002  25
   6   0   1-14.5083 25.4786  19
   6   0   1 9.33272 24.9778  25
   6   0   1 14.0515 25.0714   5
   6   0   2 13055.5 283.203   5
   6   0   4 389.252 46.6349   5
   6   0   5-8.41453 21.0661   5
   6   0   6 272.969 40.8772   5
   6   0   7-10.4909 18.7188   5
   6   0   8 850.182 52.9876   5
   6   0   9 2.39901 14.3570   5
   6   0  10 52.7119 14.5824   5
   6  -1 -10 9.81225 12.2831   6
   6   1  -9 298.192 29.7025   6
   6  -1  -9 290.615 30.5023   6
   6  -1  -9 267.840 27.8448  21
   6  -1  -8 95.7935 23.7537  21
   6   1  -8 92.2392 23.3219   6
   6  -1  -8 55.8790 21.3954   6
   6  -1  -7 261.545 33.4655  21
   6  -1  -6 1284.94 71.5653  21
   6  -1  -5 574.712 51.5700  21
  -6   1   5 598.674 52.6348  18
   6   1  -4 955.176 71.3605  19
  -6   1   4 972.544 68.4819  18
   6   1  -4 893.014 65.9561  25
   6   1  -3 658.517 61.5687  19
  -6   1   3 709.071 59.7469  18
   6   1  -3 692.310 60.0846  25
   6   1  -2 150.728 37.1684  19
  -6   1   2 157.836 34.2094  18
   6   1  -2 127.699 32.9287  25
   6   1  -1 704.209 65.6187  19
   6   1  -1 824.181 65.1535   5
   6  -1  -1 774.440 64.5595   5
  -6   1   1 740.447 62.0036  18
   6   1  -1 779.476 66.4048  25
   6   1   0 2899.46 126.363  19
   6   1   0 3150.67 123.822   5
   6  -1   0 3146.09 124.621   5
   6   1   0 2901.37 122.603  25
   6   1   1 770.272 65.4872  19
   6   1   1 760.645 62.9675   5
   6  -1   1 744.653 62.0356   5
   6   1   1 740.388 62.2763  25
   6   1   2 140.677 33.3053  25
   6   1   2 177.050 35.3328   5
   6  -1   2 132.850 32.7716   5
   6   1   3 693.114 58.3774   5
   6  -1   3 701.172 59.4746   5
   6   1   4 652.341 56.4122   5
   6  -1   4 591.859 54.0074   5
   6   1   5 130.522 29.9755   5
   6  -1   5 119.710 31.7653   5
   6   1   6 178.147 32.7167   5
   6  -1   6 225.266 36.3803   5
   6   1   7 834.375 54.9364   5
   6  -1   7 823.951 55.2184   5
   6   1   8 78.5224 20.9833   5
   6  -1   8 43.4825 20.1688   5
   6   1   9 73.3377 19.2522   5
   6  -1   9 115.199 21.2755   5
   6  -1  10 86.5057 16.2859   5
   6  -2  -9 48.4675 16.8225  21
   6  -2  -8 27.6008 18.8479  21
   6  -2  -7 367.345 36.8718  21
   6  -2  -6 87.6846 27.0870  21
  -6   2   6 41.7662 22.8280  18
   6  -2  -5 171.909 31.7785  21
  -6   2   5 162.153 30.6923  18
   6  -2  -4 158.163 31.0187  21
   6   2  -4 98.8061 29.9184  19
  -6   2   4 192.898 33.9779  18
   6   2  -3 180.211 35.5484  19
  -6   2   3 94.3698 28.8732  18
   6   2  -3 106.753 29.7244  25
   6   2  -2 235.799 38.7281  19
  -6   2   2 169.816 34.0216  18
   6   2  -1 215.337 38.2931  19
  -6   2   1 265.710 40.5333  18
   6   2  -1 264.220 40.5389  25
   6   2   0 1697.65 94.7623  19
   6  -2   0 1802.31 91.0010   5
  -6   2   0 1650.18 89.3897  18
   6   2   0 1745.95 93.0931  25
   6  -2   1 41.8440 23.0507  22
   6   2   1 14.2860 26.2766  19
   6   2   1 50.7328 26.5483  25
   6  -2   1 17.0569 23.1819   5
   6  -2   2 135.749 30.7289  22
   6   2   2 158.866 35.4479  19
   6   2   2 129.251 31.3110  25
   6  -2   2 96.9026 29.8696   5
   6  -2   3 18.4708 18.1640  22
   6   2   3 8.38961 22.8023  25
   6  -2   3 8.21657 22.6679   5
   6  -2   4 3.56254 19.9433  22
   6  -2   4 7.88121 22.3726   5
   6  -2   5 875.499 56.3063  22
   6  -2   5 720.968 55.8523   5
   6  -2   6 1022.62 58.6312  22
   6  -2   6 1093.47 62.9956   5
   6  -2   7 771.455 47.8419  22
   6  -2   7 587.739 44.9021   5
   6  -2   8 2.41913 14.4776   5
   6  -2   8 13.6653 15.0861  22
   6  -2   9 12.2058 12.1254  22
   6  -2   9 12.5825 12.6147   5
   6  -3  -8 157.737 21.7304  21
  -6   3   8 79.5133 19.7719  28
   6  -3  -7 69.4002 20.2696  21
   6  -3  -6 30.4706 18.5366  21
  -6   3   6 21.5598 17.9680  18
   6  -3  -5 131.573 26.2596  21
  -6   3   5 123.663 26.9945  18
   6  -3  -4 133.707 27.9746  21
   6   3  -4 89.5649 27.6116  19
  -6   3   4 123.417 29.4524  18
   6   3  -3 148.285 33.3645  19
  -6   3   3 194.966 33.5693  18
   6   3  -3 194.950 34.9992  25
   6  -3  -2-7.18563 21.5027  22
   6   3  -2 17.4904 23.0380  19
  -6   3   2 66.4020 25.4511  18
   6   3  -2 36.4441 22.6696  25
   6  -3  -1 195.618 31.5102  22
   6   3  -1 234.288 38.4338  19
  -6   3   1 185.524 33.6316  18
   6   3  -1 165.111 33.1085  25
   6  -3   0 48.3505 22.5470  22
   6   3   0 45.2495 26.0552  19
  -6   3   0 79.7074 24.7401  18
   6   3   0 94.7563 28.2462  25
   6  -3   1 59.2417 25.0249  22
   6   3   1 62.0283 27.8134  19
   6   3   1 12.8329 22.9021  25
   6  -3   2 101.836 25.0919  22
   6   3   2 101.242 28.2585  19
   6   3   2 177.965 33.7166  25
   6  -3   3 555.869 47.2457  22
   6   3   3 512.862 48.7458  25
   6  -3   4 1242.69 67.3595  22
   6  -3   5 9.21547 17.9183  22
   6  -3   6 184.024 26.5887  22
   6  -3   7-7.03229 15.0440  22
   6  -3   8 22.3539 12.7134  22
  -6   4   7 82.6607 16.9487  18
  -6   4   7 93.8645 17.4448  28
  -6   4   6 71.3964 19.1259  18
  -6   4   5 138.242 25.6552  18
  -6   4   4 601.127 46.8837  18
   6   4  -3 53.0636 23.7006  19
  -6   4   3 53.0571 21.0578  18
   6   4  -2 76.1178 25.2258  19
  -6   4   2 128.544 26.4162  18
   6   4  -2 75.4884 23.8783  25
   6  -4  -1 87.2872 24.1085  22
   6   4  -1 91.2440 27.6512  19
  -6   4   1 53.1998 21.8215  18
   6   4  -1 151.254 29.2246  25
   6  -4   0 244.961 32.5248  22
   6   4   0 223.442 36.0025  19
   6   4   0 228.801 35.3158  25
   6  -4   1 42.0137 21.1899  22
   6   4   1 30.2401 22.9054  19
   6   4   1 18.1364 22.5098  25
   6  -4   2 21.9394 19.4477  22
   6   4   2-10.7422 21.4292  19
   6   4   2 14.0241 19.6271  25
   6  -4   3-17.8144 18.4229  22
   6   4   3 3.24768 20.1516  19
   6   4   3 6.52959 18.2765  25
   6  -4   4 668.499 45.5246  22
   6   4   4 559.174 44.4251  25
   6  -4   5 41.6333 17.6549  22
   6  -4   6 241.886 25.2673  22
   6  -4   7 674.157 35.5918  22
  -6   4  -7 671.536 35.4600  24
  -6   5   5 17.7919 12.2581  18
  -6   5   4 101.364 18.7092  18
  -6   5   3 2.22794 13.9840  18
   6   5  -2 35.5704 18.7815  19
   6   5  -1 2.75790 16.9124  19
   6   5  -1 2.46223 16.3091  25
   6   5   0 207.336 29.7764  19
   6   5   0 198.908 29.2907  25
   6  -5   1 183.568 24.9789  22
   6   5   1 186.939 28.6283  19
   6   5   1 156.045 26.0861  25
   6  -5   2 300.032 28.7010  22
   6   5   2 266.127 30.4227  19
   6   5   2 310.906 31.9854  25
   6  -5   3 106.772 19.0542  22
   6   5   3 52.6274 18.3900  19
   6   5   3 55.8782 18.8410  25
   6  -5   4 114.588 18.1248  22
   6   5   4 82.8942 18.5230  25
   7   0  -6 5.09945 12.5623  21
   7   0  -6-6.07317 13.2714   6
   7   0  -5 131.927 21.2673  21
   7   0  -4 9.83526 15.4333  21
  -7   0   4-15.7613 15.1199  18
   7   0  -3 51.5338 21.0093  21
  -7   0   3 5.95711 16.4363  18
  -7   0   2 22.4830 17.7233  18
  -7   0   1 326.114 36.7774  18
  -7   0   0 9.97892 18.3532  18
  -7   0  -1 378.651 38.1737  18
  -7   0  -2-11.8843 17.5573  18
   7   0   2-9.22777 19.7408   5
   7   0   3 153.708 26.8059   5
   7   0   4-2.65175 15.0552   5
   7   0   5 27.9894 16.6660   5
   7   0   6 7.71226 12.2389   5
   7  -1  -6 12.3758 13.6943  21
   7   1  -6 26.4466 14.8291   6
   7  -1  -6 3.73728 12.5038   6
   7  -1  -5 56.0390 17.5588  21
  -7   1   5 67.1954 16.1659  18
   7  -1  -4 822.105 48.0491  21
  -7   1   4 703.591 45.9347  18
   7  -1  -3 24.1180 18.1130  21
  -7   1   3 46.8526 18.1742  18
  -7  -1   3 33.3021 17.4234  18
  -7   1   2 514.791 43.9330  18
  -7  -1   2 445.704 40.4007  18
  -7   1   1 542.985 44.9644  18
  -7  -1   1 551.900 44.8599  18
  -7   1   0 928.707 56.5877  18
  -7   1  -1 131.356 26.2403  18
   7  -1   2 1101.40 60.0736   5
   7   1   3-5.23876 16.4409   5
   7  -1   3 8.38467 16.9339   5
   7   1   4 614.398 41.2132   5
   7  -1   4 662.729 44.1594   5
   7   1   5 14.1921 13.1532   5
   7  -1   5 13.3646 15.9135   5
   7  -1   6 54.7175 15.9241   5
   7  -2  -5 126.142 19.5324  21
  -7   2   5 88.7612 17.8377  18
   7  -2  -4 63.2531 17.5268  21
  -7   2   4 84.0135 19.0145  18
   7  -2  -3 99.1006 20.2526  21
  -7   2   3 88.7623 21.4209  18
   7  -2  -2 92.2985 22.8758  21
   7   2  -2 70.4853 24.3928  19
  -7   2   2 58.1208 21.1223  18
  -7  -2   2 15.7862 17.0781  18
   7  -2  -1 1008.80 53.3070  21
   7   2  -1 911.575 56.9660  19
  -7   2   1 938.745 54.1255  18
   7   2  -1 1016.40 57.4939  25
   7   2   0 1536.04 71.7796  19
  -7   2   0 1561.20 67.7526  18
   7   2   0 1567.54 71.0137  25
   7   2   1 1306.19 64.5331  19
   7   2   1 1241.08 62.6335  25
   7   2   2 986.008 53.3245  25
   7  -2   4 57.2216 17.0912   5
  -7   3   4-5.34039 10.7858  18
  -7   3   3 6.06491 12.5443  18
   7   3  -2-2.32168 15.6888  19
  -7   3   2-2.13747 11.9657  18
   7   3  -1 152.835 24.5251  19
  -7   3   1 129.607 21.4416  18
   7   3  -1 175.776 24.4043  25
   7   3   0-4.94557 16.3789  19
   7   3   0 7.04946 14.9157  25
   7   3   1 46.9069 18.3045  19
   7   3   1 22.9329 16.0978  25
   7  -3   2 121.072 18.2566  22
   7   3   2 69.6406 18.3347  25
   7  -3   3-4.90872 13.6741  22
   0   0   0    0.00    0.00   0

TITL UrAc_333K in P2(1)/n
REM P2(1)/n (#14 in standard setting)
CELL 1.54184   6.189767   7.485723  13.110329  90.0000  90.2166  90.0000
ZERR    4.00   0.000271   0.000389   0.000549   0.0000   0.0043   0.0000
LATT  1
SYMM -x+1/2, y+1/2,-z+1/2
SFAC C H N O
UNIT 20.00 16.00 16.00 12.00
TREF
HKLF 4
END
;
_shelx_hkl_checksum                56141
_olex2_submission_special_instructions  'No special instructions were received'
_oxdiff_exptl_absorpt_empirical_details
;
Empirical correction (ABSPACK) includes:
- Absorption correction using spherical harmonics
- Frame scaling
;
_oxdiff_exptl_absorpt_empirical_full_max  1.183
_oxdiff_exptl_absorpt_empirical_full_min  0.890
loop_
  _twin_individual_id
  _twin_individual_mass_fraction_refined
 1 0.8877(16)
 2 0.1123(16)
