# Supplementary material
Source: MDPI journal article supplement (https://www.mdpi.com/2075-163X/9/6/373)
Supplement: s1 [file s1 › UA_-30_last.cif]

data_UA_-30_urac_243k
_audit_creation_date               2019-04-29
_audit_creation_method
;
Olex2 1.2
(compiled 2018.05.29 svn.r3508 for OlexSys, GUI svn.r5506)
;
_shelx_SHELXL_version_number       '2018/3'
_audit_contact_author_address      ?
_audit_contact_author_email        ?
_audit_contact_author_name         ''
_audit_contact_author_phone        ?
_publ_contact_author_id_orcid      ?
_publ_section_references
;
Dolomanov, O.V., Bourhis, L.J., Gildea, R.J, Howard, J.A.K. & Puschmann, H.
 (2009), J. Appl. Cryst. 42, 339-341.

Sheldrick, G.M. (2015). Acta Cryst. C71, 3-8.
;
_chemical_name_common              ?
_chemical_name_systematic          ?
_chemical_formula_moiety           'C5 H4 N4 O3'
_chemical_formula_sum              'C5 H4 N4 O3'
_chemical_formula_weight           168.12
_chemical_melting_point            ?
_chemical_oxdiff_formula           'C5 H4 N4 O3'
loop_
  _atom_type_symbol
  _atom_type_description
  _atom_type_scat_dispersion_real
  _atom_type_scat_dispersion_imag
  _atom_type_scat_source
 'C' 'C' 0.0181 0.0091 'International Tables Vol C Tables 4.2.6.8 and 6.1.1.4'
 'H' 'H' 0.0000 0.0000 'International Tables Vol C Tables 4.2.6.8 and 6.1.1.4'
 'N' 'N' 0.0311 0.0180 'International Tables Vol C Tables 4.2.6.8 and 6.1.1.4'
 'O' 'O' 0.0492 0.0322 'International Tables Vol C Tables 4.2.6.8 and 6.1.1.4'

_shelx_space_group_comment
;
The symmetry employed for this shelxl refinement is uniquely defined
by the following loop, which should always be used as a source of
symmetry information in preference to the above space-group names.
They are only intended as comments.
;
_space_group_crystal_system        'monoclinic'
_space_group_IT_number             14
_space_group_name_H-M_alt          'P 1 21/n 1'
_space_group_name_Hall             '-P 2yn'
loop_
  _space_group_symop_operation_xyz
 'x, y, z'
 '-x+1/2, y+1/2, -z+1/2'
 '-x, -y, -z'
 'x-1/2, -y-1/2, z-1/2'

_cell_length_a                     6.2110(4)
_cell_length_b                     7.3857(5)
_cell_length_c                     13.1213(8)
_cell_angle_alpha                  90
_cell_angle_beta                   90.447(6)
_cell_angle_gamma                  90
_cell_volume                       601.89(7)
_cell_formula_units_Z              4
_cell_measurement_reflns_used      1433
_cell_measurement_temperature      243(2)
_cell_measurement_theta_max        73.4010
_cell_measurement_theta_min        6.7460
_shelx_estimated_absorpt_T_max     ?
_shelx_estimated_absorpt_T_min     ?
_exptl_absorpt_coefficient_mu      1.366
_exptl_absorpt_correction_T_max    1.00000
_exptl_absorpt_correction_T_min    0.97798
_exptl_absorpt_correction_type     multi-scan
_exptl_absorpt_process_details
;
CrysAlisPro 1.171.39.44a (Rigaku Oxford Diffraction, 2018)
Empirical absorption correction using spherical harmonics,
 implemented in SCALE3 ABSPACK scaling algorithm.
;
_exptl_absorpt_special_details     ?
_exptl_crystal_colour              'translucent light-yellow'
_exptl_crystal_density_diffrn      1.855
_exptl_crystal_density_meas        ?
_exptl_crystal_density_method      ?
_exptl_crystal_description         'prism'
_exptl_crystal_F_000               344
_exptl_crystal_size_max            0.075
_exptl_crystal_size_mid            0.07
_exptl_crystal_size_min            0.027
_exptl_transmission_factor_max     ?
_exptl_transmission_factor_min     ?
_diffrn_reflns_av_R_equivalents    0.0184
_diffrn_reflns_av_unetI/netI       0.0266
_diffrn_reflns_Laue_measured_fraction_full  0.986
_diffrn_reflns_Laue_measured_fraction_max  0.986
_diffrn_reflns_limit_h_max         7
_diffrn_reflns_limit_h_min         -7
_diffrn_reflns_limit_k_max         8
_diffrn_reflns_limit_k_min         -6
_diffrn_reflns_limit_l_max         15
_diffrn_reflns_limit_l_min         -15
_diffrn_reflns_number              2590
_diffrn_reflns_point_group_measured_fraction_full  0.986
_diffrn_reflns_point_group_measured_fraction_max  0.986
_diffrn_reflns_theta_full          67.684
_diffrn_reflns_theta_max           69.967
_diffrn_reflns_theta_min           3.368
_diffrn_ambient_environment        N~2~
_diffrn_ambient_temperature        243(2)
_diffrn_detector                   'CCD plate'
_diffrn_detector_area_resol_mean   ?
_diffrn_detector_type              HyPix3000
_diffrn_measured_fraction_theta_full  0.986
_diffrn_measured_fraction_theta_max  0.986
_diffrn_measurement_details
;
List of Runs (angles in degrees, time in seconds):

  # Type    Start    End  Width  t~exp~   \w     \q     \k     \f   Frames
--------------------------------------------------------------------------
  1  \w   -100.00 -73.00   0.50    2.00    --  -38.95 -55.00 -24.00   54
  2  \w    -54.00 -16.00   0.50    2.00    --  -38.95  55.00 119.00   76
  3  \w    -65.00 -30.00   0.50    2.00    --  -38.95 -55.00 -24.00   70
  4  \w     24.00  54.00   0.50    2.00    --   38.95  55.00 119.00   60
  5  \w     89.00 153.00   0.50    3.50    --  107.00  55.00 119.00  128
  6  \w     45.00 127.00   0.50    3.50    --  107.00 -55.00 -24.00  164
  7  \w    -62.00   4.00   0.50    2.00    --  -38.95  77.00-150.00  132
  8  \w    -52.00 -14.00   0.50    2.00    --  -38.95  43.00 150.00   76
  9  \w   -102.00 -42.00   0.50    2.00    --  -38.95 -65.00 -60.00  120
 10  \w    -10.00  21.00   0.50    2.00    --  -38.95  43.00 150.00   62
 11  \w     68.00 106.00   0.50    2.00    --   38.95  21.00  90.00   76
 12  \w    -18.00  11.00   0.50    2.00    --   38.95 -32.00 -30.00   58
 13  \w     29.00  63.00   0.50    2.00    --   38.95  21.00  90.00   68
 14  \w    -26.00   0.00   0.50    2.00    --   38.95 -55.00 -24.00   52
 15  \w     16.00  48.00   0.50    2.00    --   38.95 -32.00 -30.00   64
 16  \w    -21.00  21.00   0.50    2.00    --   38.95 -32.00 150.00   84
 17  \w     34.00  63.00   0.50    2.00    --   38.95  43.00 -90.00   58
 18  \w     89.00 155.00   0.50    3.50    --  107.00  45.00   0.00  132
 19  \w     78.00 129.00   0.50    3.50    --  107.00 -61.00-150.00  102
 20  \w     68.00 114.00   0.50    3.50    --  107.00-133.00-150.00   92
 21  \w     41.00 120.00   0.50    3.50    --  107.00 -30.00 -60.00  158
 22  \w     93.00 127.00   0.50    3.50    --  107.00  30.00-180.00   68
 23  \w     99.00 153.00   0.50    3.50    --  107.00  45.00  90.00  108
 24  \w     55.00 122.00   0.50    3.50    --  107.00 -37.00  90.00  134
 25  \w     97.00 122.00   0.50    3.50    --  107.00 -53.00-150.00   50
 26  \w     99.00 125.00   0.50    3.50    --  107.00-133.00 -60.00   52
 27  \w     59.00  84.00   0.50    3.50    --  107.00 -53.00-150.00   50
 28  \w    120.00 155.00   0.50    3.50    --  107.00  30.00  30.00   70
 29  \w     44.00  92.00   0.50    3.50    --  107.00-133.00 -60.00   96
 30  \w    107.00 142.00   0.50    3.50    --  107.00  15.00  90.00   70
 31  \w     72.00 115.00   0.50    3.50    --  107.00 -37.00 150.00   86
;
_diffrn_measurement_device         'four-circle diffractometer'
_diffrn_measurement_device_type   
 'SuperNova, Single source at offset/far, HyPix3000'
_diffrn_measurement_method         '\w scans'
_diffrn_orient_matrix_type        
 'CrysAlisPro convention (1999,Acta A55,543-557)'
_diffrn_orient_matrix_UB_11        0.2128953000
_diffrn_orient_matrix_UB_12        -0.1013552000
_diffrn_orient_matrix_UB_13        -0.0189506000
_diffrn_orient_matrix_UB_21        -0.1016800000
_diffrn_orient_matrix_UB_22        -0.0941407000
_diffrn_orient_matrix_UB_23        -0.0933574000
_diffrn_orient_matrix_UB_31        0.0762441000
_diffrn_orient_matrix_UB_32        0.1562646000
_diffrn_orient_matrix_UB_33        -0.0686168000
_diffrn_radiation_monochromator    mirror
_diffrn_radiation_probe            x-ray
_diffrn_radiation_type             CuK\a
_diffrn_radiation_wavelength       1.54184
_diffrn_source                     'micro-focus sealed X-ray tube'
_diffrn_source_type                'SuperNova (Cu) X-ray Source'
_reflns_Friedel_coverage           0.000
_reflns_Friedel_fraction_full      .
_reflns_Friedel_fraction_max       .
_reflns_number_gt                  1007
_reflns_number_total               1122
_reflns_odcompleteness_completeness  98.14
_reflns_odcompleteness_iscentric   1
_reflns_odcompleteness_theta       72.42
_reflns_special_details
;
 Reflections were merged by SHELXL according to the crystal
 class for the calculation of statistics and refinement.
 
 _reflns_Friedel_fraction is defined as the number of unique
 Friedel pairs measured divided by the number that would be
 possible theoretically, ignoring centric projections and
 systematic absences. Completness statistics refer to single and
 composite reflections containing twin component 1 only.
;
_reflns_threshold_expression       'I > 2\s(I)'
_computing_cell_refinement         'CrysAlisPro 1.171.39.44a (Rigaku OD, 2018)'
_computing_data_collection         'CrysAlisPro 1.171.39.44a (Rigaku OD, 2018)'
_computing_data_reduction          'CrysAlisPro 1.171.39.44a (Rigaku OD, 2018)'
_computing_molecular_graphics      'Olex2 (Dolomanov et al., 2009)'
_computing_publication_material    'Olex2 (Dolomanov et al., 2009)'
_computing_structure_refinement    'ShelXL (Sheldrick, 2015)'
_computing_structure_solution      'ShelXT (Sheldrick, 2015)'
_refine_diff_density_max           0.324
_refine_diff_density_min           -0.188
_refine_diff_density_rms           0.056
_refine_ls_extinction_coef         0.0033(4)
_refine_ls_extinction_expression  
 'Fc^*^=kFc[1+0.001xFc^2^\l^3^/sin(2\q)]^-1/4^'
_refine_ls_extinction_method       'SHELXL-2018/3 (Sheldrick 2018)'
_refine_ls_goodness_of_fit_ref     1.109
_refine_ls_hydrogen_treatment      constr
_refine_ls_matrix_type             full
_refine_ls_number_parameters       111
_refine_ls_number_reflns           1122
_refine_ls_number_restraints       0
_refine_ls_R_factor_all            0.0537
_refine_ls_R_factor_gt             0.0481
_refine_ls_restrained_S_all        1.109
_refine_ls_shift/su_max            0.000
_refine_ls_shift/su_mean           0.000
_refine_ls_structure_factor_coef   Fsqd
_refine_ls_weighting_details      
 'w=1/[\s^2^(Fo^2^)+(0.0912P)^2^+0.3076P] where P=(Fo^2^+2Fc^2^)/3'
_refine_ls_weighting_scheme        calc
_refine_ls_wR_factor_gt            0.1443
_refine_ls_wR_factor_ref           0.1545
_refine_special_details
;
 Refined as a 2-component twin.
;
_olex2_refinement_description
;
1. Twinned data refinement
 Scales: 0.9328(19)
 0.0672(19)
2. Fixed Uiso
 At 1.2 times of:
  All N(H) groups
3.a Aromatic/amide H refined with riding coordinates:
 N1(H1), N2(H2), N3(H3), N4(H4)
;
_atom_sites_solution_hydrogens     geom
_atom_sites_solution_primary       ?
_atom_sites_solution_secondary     ?
loop_
  _atom_site_label
  _atom_site_type_symbol
  _atom_site_fract_x
  _atom_site_fract_y
  _atom_site_fract_z
  _atom_site_U_iso_or_equiv
  _atom_site_adp_type
  _atom_site_occupancy
  _atom_site_site_symmetry_order
  _atom_site_calc_flag
  _atom_site_refinement_flags_posn
  _atom_site_refinement_flags_adp
  _atom_site_refinement_flags_occupancy
  _atom_site_disorder_assembly
  _atom_site_disorder_group
 O1 O 0.9244(3) 0.4837(3) 0.36791(16) 0.0440(6) Uani 1 1 d . . . . .
 O2 O 0.5823(3) 0.7697(3) 0.62989(15) 0.0404(6) Uani 1 1 d . . . . .
 O3 O -0.0294(3) 0.9668(3) 0.35945(15) 0.0382(5) Uani 1 1 d . . . . .
 N1 N 0.7537(4) 0.6354(3) 0.49487(17) 0.0341(6) Uani 1 1 d . . . . .
 H1 H 0.858042 0.606739 0.535204 0.041 Uiso 1 1 calc R . . . .
 N2 N 0.6139(4) 0.6332(3) 0.32918(18) 0.0353(6) Uani 1 1 d . . . . .
 H2 H 0.618946 0.604076 0.265793 0.042 Uiso 1 1 calc R . . . .
 N3 N 0.2357(4) 0.8764(3) 0.47472(18) 0.0325(6) Uani 1 1 d . . . . .
 H3 H 0.184388 0.918957 0.530503 0.039 Uiso 1 1 calc R . . . .
 N4 N 0.2738(4) 0.7989(3) 0.31359(17) 0.0323(6) Uani 1 1 d . . . . .
 H4 H 0.249282 0.785589 0.249432 0.039 Uiso 1 1 calc R . . . .
 C1 C 0.7729(5) 0.5784(4) 0.3958(2) 0.0352(6) Uani 1 1 d . . . . .
 C2 C 0.4483(4) 0.7346(4) 0.3655(2) 0.0309(6) Uani 1 1 d . . . . .
 C3 C 0.4271(4) 0.7831(4) 0.4649(2) 0.0319(6) Uani 1 1 d . . . . .
 C4 C 0.5862(4) 0.7340(4) 0.5385(2) 0.0318(6) Uani 1 1 d . . . . .
 C5 C 0.1428(4) 0.8893(4) 0.3814(2) 0.0330(6) Uani 1 1 d . . . . .

loop_
  _atom_site_aniso_label
  _atom_site_aniso_U_11
  _atom_site_aniso_U_22
  _atom_site_aniso_U_33
  _atom_site_aniso_U_23
  _atom_site_aniso_U_13
  _atom_site_aniso_U_12
 O1 0.0412(11) 0.0547(13) 0.0360(12) -0.0009(9) -0.0068(9) 0.0109(10)
 O2 0.0472(12) 0.0503(12) 0.0237(11) 0.0006(8) -0.0075(9) 0.0006(9)
 O3 0.0371(10) 0.0491(12) 0.0283(10) 0.0005(8) -0.0058(8) 0.0070(9)
 N1 0.0331(12) 0.0394(13) 0.0297(12) 0.0035(9) -0.0081(10) 0.0012(10)
 N2 0.0369(12) 0.0424(13) 0.0265(12) -0.0015(9) -0.0067(9) 0.0017(10)
 N3 0.0346(11) 0.0384(12) 0.0245(11) -0.0020(9) -0.0019(9) 0.0018(10)
 N4 0.0344(12) 0.0398(13) 0.0226(11) -0.0018(9) -0.0050(9) 0.0017(10)
 C1 0.0357(14) 0.0365(14) 0.0335(14) 0.0029(11) -0.0060(12) -0.0015(11)
 C2 0.0338(13) 0.0315(13) 0.0272(14) 0.0009(10) -0.0059(11) -0.0030(10)
 C3 0.0334(13) 0.0358(14) 0.0264(13) 0.0008(10) -0.0048(11) -0.0008(11)
 C4 0.0352(14) 0.0323(13) 0.0279(13) 0.0029(10) -0.0054(11) -0.0044(11)
 C5 0.0355(13) 0.0373(15) 0.0259(13) 0.0006(10) -0.0033(11) -0.0033(11)

_geom_special_details
;
 All esds (except the esd in the dihedral angle between two l.s. planes)
 are estimated using the full covariance matrix.  The cell esds are taken
 into account individually in the estimation of esds in distances, angles
 and torsion angles; correlations between esds in cell parameters are only
 used when they are defined by crystal symmetry.  An approximate (isotropic)
 treatment of cell esds is used for estimating esds involving l.s. planes.
;
loop_
  _geom_bond_atom_site_label_1
  _geom_bond_atom_site_label_2
  _geom_bond_distance
  _geom_bond_site_symmetry_2
  _geom_bond_publ_flag
 O1 C1 1.231(4) . ?
 O2 C4 1.228(4) . ?
 O3 C5 1.245(3) . ?
 N1 H1 0.8600 . ?
 N1 C1 1.373(4) . ?
 N1 C4 1.396(4) . ?
 N2 H2 0.8600 . ?
 N2 C1 1.375(4) . ?
 N2 C2 1.361(4) . ?
 N3 H3 0.8600 . ?
 N3 C3 1.381(4) . ?
 N3 C5 1.353(3) . ?
 N4 H4 0.8600 . ?
 N4 C2 1.361(3) . ?
 N4 C5 1.382(4) . ?
 C2 C3 1.360(4) . ?
 C3 C4 1.423(4) . ?

loop_
  _geom_angle_atom_site_label_1
  _geom_angle_atom_site_label_2
  _geom_angle_atom_site_label_3
  _geom_angle
  _geom_angle_site_symmetry_1
  _geom_angle_site_symmetry_3
  _geom_angle_publ_flag
 C1 N1 H1 115.9 . . ?
 C1 N1 C4 128.2(2) . . ?
 C4 N1 H1 115.9 . . ?
 C1 N2 H2 120.6 . . ?
 C2 N2 H2 120.6 . . ?
 C2 N2 C1 118.7(2) . . ?
 C3 N3 H3 125.9 . . ?
 C5 N3 H3 125.9 . . ?
 C5 N3 C3 108.2(2) . . ?
 C2 N4 H4 125.8 . . ?
 C2 N4 C5 108.5(2) . . ?
 C5 N4 H4 125.8 . . ?
 O1 C1 N1 121.9(3) . . ?
 O1 C1 N2 121.7(3) . . ?
 N1 C1 N2 116.4(3) . . ?
 N4 C2 N2 128.1(2) . . ?
 C3 C2 N2 124.0(2) . . ?
 C3 C2 N4 107.8(2) . . ?
 N3 C3 C4 131.1(3) . . ?
 C2 C3 N3 108.1(2) . . ?
 C2 C3 C4 120.8(3) . . ?
 O2 C4 N1 122.2(2) . . ?
 O2 C4 C3 126.1(3) . . ?
 N1 C4 C3 111.8(2) . . ?
 O3 C5 N3 126.9(3) . . ?
 O3 C5 N4 125.6(2) . . ?
 N3 C5 N4 107.4(2) . . ?


loop_
  _geom_hbond_atom_site_label_D
  _geom_hbond_atom_site_label_H
  _geom_hbond_atom_site_label_A
  _geom_hbond_distance_DH
  _geom_hbond_distance_HA
  _geom_hbond_distance_DA
  _geom_hbond_angle_DHA
  _geom_hbond_site_symmetry_A
  _geom_hbond_publ_flag
 N1 H1 O1 0.86 1.96 2.821(3) 173.2 3_766 yes
 N2 H2 O3 0.86 2.01 2.809(3) 155.1 2_545 yes
 N3 H3 O3 0.86 1.94 2.786(3) 169.7 3_576 yes
 N4 H4 O2 0.86 1.92 2.727(3) 156.3 4_575 yes


loop_
  _geom_torsion_atom_site_label_1
  _geom_torsion_atom_site_label_2
  _geom_torsion_atom_site_label_3
  _geom_torsion_atom_site_label_4
  _geom_torsion
  _geom_torsion_site_symmetry_1
  _geom_torsion_site_symmetry_2
  _geom_torsion_site_symmetry_3
  _geom_torsion_site_symmetry_4
  _geom_torsion_publ_flag
 N2 C2 C3 N3 -176.8(2) . . . . ?
 N2 C2 C3 C4 2.1(4) . . . . ?
 N3 C3 C4 O2 -0.7(5) . . . . ?
 N3 C3 C4 N1 178.7(3) . . . . ?
 N4 C2 C3 N3 0.9(3) . . . . ?
 N4 C2 C3 C4 179.8(2) . . . . ?
 C1 N1 C4 O2 176.3(3) . . . . ?
 C1 N1 C4 C3 -3.1(4) . . . . ?
 C1 N2 C2 N4 -178.5(3) . . . . ?
 C1 N2 C2 C3 -1.3(4) . . . . ?
 C2 N2 C1 O1 178.5(3) . . . . ?
 C2 N2 C1 N1 -1.6(4) . . . . ?
 C2 N4 C5 O3 179.2(3) . . . . ?
 C2 N4 C5 N3 -1.3(3) . . . . ?
 C2 C3 C4 O2 -179.5(3) . . . . ?
 C2 C3 C4 N1 -0.1(4) . . . . ?
 C3 N3 C5 O3 -178.6(3) . . . . ?
 C3 N3 C5 N4 1.8(3) . . . . ?
 C4 N1 C1 O1 -176.1(3) . . . . ?
 C4 N1 C1 N2 4.0(4) . . . . ?
 C5 N3 C3 C2 -1.6(3) . . . . ?
 C5 N3 C3 C4 179.5(3) . . . . ?
 C5 N4 C2 N2 177.8(3) . . . . ?
 C5 N4 C2 C3 0.2(3) . . . . ?

_shelx_res_file
;
TITL urac_243k_a.res in P2(1)/n
    urac_243k.res
    created by SHELXL-2018/3 at 22:47:04 on 29-Apr-2019
REM Old TITL UrAc_243K in P2(1)/n
REM SHELXT solution in P2(1)/n: R1 0.172, Rweak 0.027, Alpha 0.087
REM <I/s> 0.426 for 100 systematic absences, Orientation as input
REM Formula found by SHELXT: C9 O3
CELL 1.54184 6.211 7.3857 13.1213 90 90.447 90
ZERR 4 0.0004 0.0005 0.0008 0 0.006 0
LATT 1
SYMM 0.5-X,0.5+Y,0.5-Z
SFAC C H N O
UNIT 20 16 16 12

L.S. 20
PLAN  20
BOND $H
Htab
conf
list 4
fmap 2
acta
TWIN 1 0 0 0 -1 0 0 0 -1 2
OMIT -4 140
OMIT 1 2 2
OMIT -1 2 4
OMIT -1 2 6
OMIT 1 0 5
REM <olex2.extras>
REM <HklSrc "%.\\UrAc_243K.hkl">
REM </olex2.extras>

WGHT    0.091200    0.307600
EXTI    0.003351
BASF   0.06722
FVAR       4.00610
O1    4    0.924402    0.483657    0.367910    11.00000    0.04124    0.05472 =
         0.03597   -0.00086   -0.00678    0.01089
O2    4    0.582255    0.769705    0.629887    11.00000    0.04718    0.05026 =
         0.02373    0.00055   -0.00746    0.00063
O3    4   -0.029404    0.966804    0.359452    11.00000    0.03713    0.04909 =
         0.02835    0.00050   -0.00575    0.00702
N1    3    0.753694    0.635406    0.494871    11.00000    0.03310    0.03935 =
         0.02968    0.00350   -0.00812    0.00123
AFIX  43
H1    2    0.858042    0.606739    0.535204    11.00000   -1.20000
AFIX   0
N2    3    0.613888    0.633236    0.329183    11.00000    0.03686    0.04240 =
         0.02647   -0.00149   -0.00671    0.00166
AFIX  43
H2    2    0.618946    0.604076    0.265793    11.00000   -1.20000
AFIX   0
N3    3    0.235681    0.876427    0.474717    11.00000    0.03462    0.03837 =
         0.02455   -0.00203   -0.00185    0.00185
AFIX  43
H3    2    0.184388    0.918957    0.530503    11.00000   -1.20000
AFIX   0
N4    3    0.273840    0.798920    0.313588    11.00000    0.03439    0.03980 =
         0.02262   -0.00175   -0.00499    0.00169
AFIX  43
H4    2    0.249282    0.785589    0.249432    11.00000   -1.20000
AFIX   0
C1    1    0.772920    0.578417    0.395793    11.00000    0.03567    0.03647 =
         0.03350    0.00289   -0.00600   -0.00154
C2    1    0.448269    0.734555    0.365496    11.00000    0.03383    0.03154 =
         0.02719    0.00090   -0.00588   -0.00296
C3    1    0.427082    0.783142    0.464897    11.00000    0.03340    0.03585 =
         0.02638    0.00076   -0.00482   -0.00076
C4    1    0.586161    0.734039    0.538480    11.00000    0.03515    0.03235 =
         0.02795    0.00289   -0.00541   -0.00435
C5    1    0.142800    0.889334    0.381370    11.00000    0.03555    0.03733 =
         0.02594    0.00064   -0.00325   -0.00325
HKLF 4


REM  urac_243k_a.res in P2(1)/n
REM wR2 = 0.1545, GooF = S = 1.109, Restrained GooF = 1.109 for all data
REM R1 = 0.0481 for 1007 Fo > 4sig(Fo) and 0.0537 for all 1122 data
REM 111 parameters refined using 0 restraints

END

WGHT      0.0913      0.3070

REM Instructions for potential hydrogen bonds
EQIV $1 -x+2, -y+1, -z+1
HTAB N1 O1_$1
EQIV $2 -x+1/2, y-1/2, -z+1/2
HTAB N2 O3_$2
EQIV $3 -x, -y+2, -z+1
HTAB N3 O3_$3
EQIV $4 x-1/2, -y+3/2, z-1/2
HTAB N4 O2_$4

REM Highest difference peak  0.324,  deepest hole -0.188,  1-sigma level  0.056
Q1    1   0.4338  0.7944  0.6304  11.00000  0.05    0.32
Q2    1   0.4367  0.7734  0.5336  11.00000  0.05    0.27
Q3    1   0.0909  0.9701  0.5602  11.00000  0.05    0.20
Q4    1   0.9309  0.5113  0.4540  11.00000  0.05    0.20
Q5    1   0.5850  0.7349  0.4675  11.00000  0.05    0.20
Q6    1   0.9220  0.5086  0.2897  11.00000  0.05    0.17
Q7    1   0.4319  0.7116  0.4341  11.00000  0.05    0.17
Q8    1  -0.0621  0.9852  0.2905  11.00000  0.05    0.16
Q9    1   1.0759  0.4496  0.3606  11.00000  0.05    0.16
Q10   1  -0.0705  0.9246  0.4420  11.00000  0.05    0.16
Q11   1   0.5615  0.7447  0.1811  11.00000  0.05    0.15
Q12   1   0.0824  1.0948  0.4833  11.00000  0.05    0.14
Q13   1   0.2916  0.8145  0.6127  11.00000  0.05    0.14
Q14   1   0.9008  0.4880  0.5412  11.00000  0.05    0.14
Q15   1   0.1725  0.7067  0.2441  11.00000  0.05    0.14
Q16   1   0.7622  0.8618  0.6760  11.00000  0.05    0.14
Q17   1   0.2533  0.7854  0.5077  11.00000  0.05    0.13
Q18   1  -0.0029  1.0586  0.3955  11.00000  0.05    0.13
Q19   1   0.7451  0.7185  0.3330  11.00000  0.05    0.13
Q20   1   0.3099  0.8222  0.1631  11.00000  0.05    0.13
;
_shelx_res_checksum                30481
_shelx_hkl_file
;
   0   0   1 6.49282 4.17608  13
   0   0  -1 8.36165 4.69049  15
   0   0  -2 36720.4 563.627   8
   0   0  -2 36217.1 561.860  15
   0   0  -3-2.24162 14.4937   8
   0   0  -3 10.7624 13.6736  15
   0   0  -4 57526.0 917.119   8
   0   0   4 58651.6 904.640  11
   0   0  -5 10.1260 17.9963   8
   0   0   5-5.20248 15.7464  11
   0   0   6 65498.3 1067.48  11
   0   0   6 67567.6 1074.87   4
   0   0  -6 67256.3 1078.68   8
   0   0   7-3.09223 20.2691   4
   0   0  -7 3.24855 20.1098   2
   0   0  -7-3.15947 22.0648   8
   0   0  -8 33713.7 632.297   8
   0   0  -8 32575.7 634.167   2
   0   0   8 33504.8 628.768   4
   0   0  -9-4.73059 22.7979   2
   0   0  -9-4.64612 26.9621   8
   0   0   9-9.05444 25.3500   4
   0   0 -10 1428.59 103.754   8
   0   0 -10 1608.66 110.426   2
   0   0  10 1377.52 101.075   4
   0   0 -10 1606.77 81.6532   6
   0   0 -11-19.1560 27.5251   6
   0   0 -12 8120.48 218.247   6
   0   0 -13-9.49435 26.6365   6
   0   0 -14 691.707 55.5287   6
   0   0 -15 4.27473 22.2118   6
   0   0 -16 672.215 38.3131   6
   0   1   0 12.3544 8.43534  16
   0   1   0 9.43773 5.29706  13
   0  -1   0 7.50920 4.59080   9
   0   1  -1 311.128 15.7060  16
   0   1  -1 318.058 14.1974  10
   0   1   1 310.828 18.5213  13
   0  -1  -1 335.335 17.4891   9
   0  -1  -1 342.998 16.3762   8
   0  -1  -1 307.136 16.2819  15
   0   1  -1 327.435 19.1768   7
   0  -1  -2 37998.6 588.089   9
   0  -1  -2 37723.1 585.180   8
   0   1  -2 37835.3 581.727  10
   0   1  -2 38086.3 590.225   7
   0   1   2 38133.3 590.254  13
   0   1  -2 37568.3 571.082  16
   0  -1   2 37255.4 565.381  11
   0  -1  -2 38488.2 588.933  17
   0  -1  -2 37737.3 587.916  15
   0  -1  -3 392.688 29.8976  15
   0  -1  -3 339.263 27.4215   8
   0  -1  -3 351.745 27.5459  17
   0   1  -3 403.120 29.1634   7
   0  -1  -4 7079.94 158.521  15
   0  -1  -4 7040.73 157.699   8
   0   1  -4 6771.20 152.336   8
   0  -1  -5 54.6716 20.9151   8
   0   1  -5 64.6323 21.0135   8
   0  -1   5 63.7496 21.1672   4
   0   1   5 84.1967 21.1241   4
   0   1   5 75.6148 21.2565  11
   0  -1  -6 4418.52 134.709   2
   0   1  -6 4080.07 132.169   8
   0  -1  -6 4346.52 135.758   8
   0  -1   6 4329.07 132.293   4
   0   1   6 4471.70 135.342  11
   0   1   6 4012.22 128.978   4
   0   1   7-9.59159 21.5162  11
   0  -1  -7 3.29427 21.2998   8
   0   1  -7 3.28666 20.6518   2
   0  -1  -7 16.3514 20.8490   2
   0   1  -7 3.13382 21.6237   8
   0  -1   7 3.14228 21.1466   4
   0   1   7 21.7031 20.0466   4
   0   1   8 2019.36 105.699  11
   0  -1   8 2141.08 109.547   4
   0   1   8 2182.96 106.891   4
   0   1  -8 2283.76 111.759   8
   0  -1  -8 2143.26 110.954   8
   0   1  -8 2310.02 113.498   2
   0  -1  -8 2117.17 108.147   2
   0  -1   9 495.665 57.3378   4
   0   1  -9 376.026 50.5978   2
   0   1   9 485.962 56.9463  11
   0  -1  -9 342.103 50.4158   8
   0   1   9 304.062 48.0264   4
   0   1  -9 381.900 52.8013   8
   0  -1  -9 491.794 58.1741   2
   0  -1  10 176.510 41.2482   4
   0   1  10 206.443 44.9937   4
   0  -1 -10 197.072 45.4835   8
   0   1 -10 175.659 35.5127   6
   0  -1 -10 208.847 43.6024   2
   0  -1 -10 152.790 31.9315  21
   0  -1 -10 162.269 32.4088   6
   0   1 -10 176.448 39.9481   2
   0   1 -10 226.207 45.0349   8
   0  -1 -11 1770.24 89.0100  21
   0  -1 -11 1793.16 90.4154   6
   0   1 -11 1786.65 90.5803   6
   0  -1 -12 3049.88 121.261  21
   0   1 -12 3340.84 126.784   6
   0  -1 -12 3172.14 124.136   6
   0  -1 -13 369.435 45.6603   6
   0  -1 -13 353.169 43.3520  21
   0   1 -13 364.658 45.1153   6
   0  -1 -14 325.080 39.9783   6
   0   1 -14 375.001 43.0055   6
   0   1 -15 8.12089 19.9328   6
   0  -1 -15 21.8971 21.0190   6
   0  -1 -16-12.2356 14.5636   6
   0   1 -16 26.7182 14.0490   6
   0   2   0 18884.5 322.085  16
   0   2   0 18688.2 322.244   7
   0   2  -1 264.668 22.2537  16
   0   2  -1 252.925 25.4508   7
   0   2  -2 3518.45 93.8464   7
   0  -2  -2 3290.08 93.4608  17
   0   2  -2 3284.80 80.5000  16
   0  -2  -2 3265.74 83.3445   9
   0  -2  -2 3195.40 81.7649  15
   0   2  -3 2476.10 81.3619   7
   0  -2  -3 2444.26 76.1070  15
   0  -2  -3 2316.18 81.1042  17
   0  -2  -4 12399.1 248.586  17
   0   2   4 12139.5 250.371  11
   0   2  -4 11660.2 245.880   7
   0  -2  -4 11710.4 242.762   8
   0  -2  -4 12239.5 243.700  15
   0  -2  -5 2582.37 95.2747   8
   0   2   5 2540.81 99.7900  11
   0  -2  -6 2473.04 103.173   8
   0   2   6 2471.84 105.226  11
   0   2   7 1252.94 80.9428  11
   0  -2  -7 1315.82 80.8898   8
   0   2   8 2602.60 127.950  11
   0  -2  -9 2685.19 106.071  21
   0   2   9 2670.09 137.175  11
   0  -2 -10 78.7948 27.8324  21
   0   2  10 113.599 39.7388  11
   0  -2 -11 2063.16 99.1812  21
   0  -2 -12 818.053 64.1008  21
   0   2 -12 806.892 61.6214   6
   0  -2 -13 228.172 37.9023  21
   0   2 -13 265.140 37.7380   6
   0  -2 -14 1180.58 66.2657  21
   0   2 -14 1131.12 62.7018   6
   0   2  15 16.3011 18.2411  23
   0   3   0 5.97020 16.3324   7
   0   3  -1 1274.04 62.3612   7
   0   3  -2 21601.5 395.221   7
   0  -3  -2 21195.7 396.718  17
   0  -3  -3 602.115 47.5681  17
   0   3   3 515.557 41.6703  11
   0   3  -3 590.945 46.2490   7
   0   3  -4 1678.99 79.7222   7
   0   3   4 1639.82 79.5879  11
   0  -3  -4 1478.35 79.0866  17
   0  -3  -5 1588.22 84.3332  17
   0   3  -5 1501.18 81.2164   7
   0   3   5 1636.42 85.9810  11
   0   3   6 3470.86 141.090  11
   0   3   7 460.298 56.0277  11
   0   3   8 276.484 36.1109  28
   0   3   8 346.305 51.6550  11
   0  -3  -8 273.228 37.5040  21
   0  -3  -9 511.562 49.1635  21
   0   3   9 340.366 58.6586  11
   0  -3 -10 2773.12 116.482  21
   0  -3 -11 548.456 54.8874  21
   0   3  12 329.334 43.6874  30
   0  -3 -12 266.927 42.0248  21
   0  -3 -13 3329.90 119.307  21
   0   3  13 3209.25 114.820  30
   0   3  14 25.3978 18.9574  30
   0  -3 -14 67.4864 23.9316  21
   0   3  15 3.21136 13.9502  23
   0   4   0 2922.11 113.254   7
   0  -4  -1 398.761 42.6206  17
   0   4  -1 475.325 46.6423   7
   0  -4  -2 2193.89 101.198  17
   0   4  -2 2455.47 104.174   7
   0  -4  -3 859.949 64.3144  17
   0   4  -3 1044.34 68.7253   7
   0   4  -4 14888.8 335.915   7
   0  -4  -4 15036.6 341.947  17
   0  -4  -5 8118.59 239.670  17
   0   4  -5 8541.65 238.189   7
   0   4  -6 168.098 37.3123   7
   0   4   7 2200.74 126.397  11
   0   4   7 2245.61 98.0606  24
   0   4   7 2224.84 98.1695  28
   0   4  -7 2138.85 92.6459  20
   0   4   8 754.838 78.3879  11
   0   4  -8 649.446 53.9975  20
   0   4   8 690.880 57.1547  28
   0   4  -9 2783.72 110.574  20
   0   4   9 2732.34 116.486  28
   0   4  10 5643.66 174.015  28
   0  -4 -10 5553.31 169.729  21
   0  -4 -11 539.971 51.7195  21
   0  -4 -12 5458.52 158.774  21
   0   4  12 5410.88 159.169  30
   0  -4 -13 2166.86 85.1623  21
   0   4  13 1966.73 82.6315  30
   0   4  13 1917.75 83.0251  23
   0   4  14 498.491 36.8079  23
   0   4  14 515.293 36.3918  30
   0   5   0-4.15743 21.0136   7
   0  -5   0 15.9915 22.3859  17
   0  -5  -1 248.855 42.3677  17
   0   5   1 285.640 43.8487   7
   0   5  -1 316.413 44.3798   7
   0   5   2 389.785 50.6587   7
   0   5  -2 364.905 47.1822   7
   0  -5  -2 387.236 49.6002  17
   0   5   3 990.037 78.2209   7
   0  -5  -3 1109.09 84.5467  17
   0   5  -3 1014.59 78.3791   7
   0   5  -4 73.6839 25.7044  20
   0  -5  -4 70.2295 31.9963  17
   0   5   4 71.9204 24.7810  24
   0   5  -4 55.5827 28.2532   7
   0   5   5 1338.82 74.8584  24
   0  -5  -5 1479.38 104.987  17
   0   5   5 1377.54 77.2523  28
   0   5  -5 1318.54 72.7784  20
   0   5  -5 1303.48 93.4255   7
   0   5  -6 1134.87 69.5896  20
   0   5   6 1167.17 73.2108  28
   0   5   6 1138.42 72.1903  24
   0   5  -7 183.330 35.4340  20
   0   5   7 187.968 35.7276  28
   0   5   8 947.010 70.6263  28
   0   5  -8 933.685 65.3530  20
   0   5  -9 360.625 44.4072  20
   0   5   9 306.331 44.5484  28
   0   5 -10 62.2685 25.4398  20
   0   5  10 11.7732 26.5425  30
   0   5  11 1255.14 71.0136  30
   0   5 -11 1435.77 69.3598  20
   0   5  12 498.251 41.5444  30
   0   5  13-3.11568 13.7412  30
   0   6   0 2045.15 102.559  29
   0   6  -1 1283.45 81.7119  29
   0   6   1 1496.22 88.1971  29
   0   6   2 781.674 64.7649  29
   0  -6  -2 642.448 73.0041  17
   0   6   4 463.779 47.3723  24
   0   6   5 54.2354 26.1994  24
   0   6  -5 76.2575 28.4611  20
   0   6   6 566.491 53.8895  28
   0   6  -6 602.215 53.7361  20
   0   6   6 582.771 54.1626  24
   0   6  -7 3283.20 123.061  20
   0   6   7 3215.99 125.215  28
   0   6   8 303.591 41.0716  31
   0   6  -8 312.583 41.7818  20
   0   6  -9 79.9610 27.6812  20
   0   6 -10 65.5459 23.9142  20
   0   6 -11 370.145 32.6318  20
   0   6  12 764.601 37.8059  30
   0   7   0 18.9136 26.1025  29
   0   7   1 342.910 46.7118  29
   0   7  -1 329.204 46.0501  29
   0   7   2 167.947 38.0017  29
   0   7   3 299.788 45.9301  29
   0   7   4 97.1331 32.4885  29
   0   7   5 1240.01 81.0401  29
   0   7   6 265.362 38.9759  31
   0   7   6 259.572 41.1660  29
   0   7  -6 265.925 36.4756  20
   0   7   7 253.187 38.2991  29
   0   7   7 285.761 38.1253  31
   0   7  -7 246.688 33.5178  20
   0   7   8 8.94680 18.8258  31
   0   7   8 8.22271 20.2498  29
   0   7  -8 18.8394 19.2737  20
   0   7  -9 141.469 23.8023  20
   0   7   9 106.514 24.8522  29
   0   7 -10 216.394 23.0937  20
   0   7  10 160.500 23.6537  29
   0   8   1 152.895 30.4734  29
   0   8   2 761.536 56.6636  29
   0   8   3 183.430 30.7380  31
   0   8   3 114.698 28.0378  29
   0   8   4 5.27385 20.0931  29
   0   8   4-11.6124 19.8648  31
   0   8   5 1354.33 65.8274  31
   0   8   5 1325.62 68.5266  29
   0   8   6 733.213 48.2081  29
   0   8   6 671.389 44.0316  31
   0   8   7 1374.55 60.0468  29
   0   8   7 1432.38 57.6459  31
   1   0 -16-5.13628 14.2465   6
   1   0 -15 1719.69 74.1139   6
   1   0 -14 2.66486 24.0263   6
   1   0 -13 1077.85 71.6531   6
   1   0 -12-26.3124 27.6847   6
   1   0 -11 2469.04 108.906   6
  -1   0  10 5.41392 24.0546   4
   1   0 -10-5.97160 22.5227   6
   1   0 -10 5.59984 22.5788   2
   1   0  -9 1291.57 92.6800   2
  -1   0   9 1073.82 83.5837   4
   1   0  -8-4.11243 22.5969   2
   1   0  -7 3580.07 131.516  15
   1   0  -7 3747.42 137.678   2
   1   0  -6 13.9423 21.8763   8
   1   0  -6 7.71756 18.3891  15
   1   0  -6-2.81763 20.3687   2
  -1   0   6 18.4911 17.2572  13
  -1   0   5 23493.3 433.305  13
   1   0  -5 24063.4 443.450   2
   1   0  -4 11.5442 15.2877  15
  -1   0   4-7.79110 15.0188  13
   1   0  -4-1.81174 16.0995   2
   1   0  -3 8115.52 168.224   2
   1   0  -2 2.04988 12.4470  12
   1   0  -2 4.37049 14.1291   2
  -1   0   2 3.48462 7.61388  16
   1   0  -1 20607.0 335.355  14
  -1   0   0 9.48452 11.5869   3
  -1   0   0 16.5794 4.50286   7
  -1   0  -1 2556.41 67.2944   9
  -1   0  -1 3178.48 72.8435   1
  -1   0  -2-4.05599 12.9752   9
  -1   0  -3 2320.13 73.8075  10
  -1   0  -3 2396.79 73.4543   9
  -1   0  -4 3.37357 14.6547   9
   1   0   4-8.87797 16.7900   4
   1   0   4-4.95744 15.9273  11
  -1   0  -4 8.75618 17.5007  10
   1   0   5 4280.97 121.379  11
   1   0   5 3933.93 124.067   4
  -1   0  -5 4067.83 125.120  10
   1   0   6 12.3855 18.8752  11
   1   0   6-8.23120 20.2700   4
  -1   0  -6-10.9802 18.7086   8
  -1   0  -7 11880.8 281.455   8
   1   0   7 11544.9 275.879   4
  -1   0  -8 28.5715 23.6868   8
   1   0   8-32.1469 26.6938   4
   1   0   9 8077.21 246.671   4
  -1   0  -9 8025.67 247.343   8
  -1   0 -10 11.4043 23.7984   2
  -1   0 -10 3.00994 22.9353   6
  -1   0 -10-11.1197 22.4175   8
  -1   0 -11 2615.58 112.531   6
  -1   0 -12-3.31842 28.1572   6
  -1   0 -13 605.833 55.2604   6
  -1   0 -14-13.4250 24.0350   6
  -1   0 -15 347.818 35.7784   6
  -1   0 -16-12.6880 14.6635   6
   1   1 -16 38.0226 13.8401   6
   1  -1 -16 46.9215 14.0533   6
   1  -1 -15 77.4324 22.4258   6
   1   1 -15 105.271 24.3532   6
   1  -1 -14 5.05683 22.4682   6
   1   1 -14 7.65375 22.6711   6
   1  -1 -13 2900.34 113.262  21
   1  -1 -13 2959.01 115.948   6
   1   1 -13 2862.68 114.707   6
   1  -1 -12 1353.53 81.1534   6
   1   1 -12 1384.49 81.2537   6
   1  -1 -12 1348.52 79.0148  21
   1   1 -11 357.188 44.7227   6
   1  -1 -11 399.410 45.8774  21
   1  -1 -11 323.486 44.7392   6
   1   1 -10 2585.69 106.971   6
   1  -1 -10 2461.08 104.904   6
   1   1 -10 2299.18 133.861   2
  -1   1  10 2391.49 135.268   4
   1  -1 -10 2495.12 104.689  21
  -1  -1  10 2364.74 133.831   4
   1  -1 -10 2323.39 134.094   2
  -1   1   9 250.303 43.0886   4
   1   1  -9 209.423 42.1092   2
  -1  -1   9 202.008 40.3104   4
   1  -1  -9 219.418 43.4479   2
   1  -1  -8 280.953 43.6058   2
   1   1  -8 301.992 43.8873   2
   1  -1  -8 265.874 41.3350  15
  -1   1   8 320.830 43.1825  11
   1  -1  -7 8067.50 219.120   2
   1   1  -7 7843.54 217.308   8
   1  -1  -7 8243.41 221.851  15
   1   1  -7 8021.27 217.405   2
   1  -1  -6 3313.90 117.510  15
  -1   1   6 3277.58 115.653  13
   1   1  -6 3078.38 114.486   8
   1   1  -6 3082.68 114.666   2
   1  -1  -6 3376.89 118.783   2
   1  -1  -5 778.622 52.0118  15
   1   1  -5 916.404 55.4056   2
   1   1  -5 862.944 51.7977   8
   1   1  -5 799.550 47.8778  15
  -1   1   5 933.156 55.4061  13
   1  -1  -5 862.435 53.9827   2
  -1   1   4 1174.86 56.7609  13
   1  -1  -4 1151.49 56.8744  15
   1   1  -4 1143.53 54.2372   8
   1  -1  -4 1068.99 54.3371   2
   1   1  -4 1002.50 47.9002  15
   1   1  -4 1145.36 55.1442   2
  -1   1   3 1321.46 58.2154  13
   1   1  -3 1374.74 54.7802   2
   1  -1  -3 1452.21 55.8566   2
  -1   1   3 1214.27 49.1330  16
   1   1  -3 1198.16 48.3892  15
   1  -1  -3 1311.91 47.2922  17
   1  -1  -2 54173.4 835.097  12
   1   1  -2 53701.6 818.839  12
  -1   1   2 53172.1 830.062  16
   1   1  -2 53688.1 829.307   2
  -1   1   1 754.862 32.2764   3
  -1   1   1 751.466 35.0452  16
   1  -1  -1 764.864 33.1734  14
   1   1  -1 718.989 24.1323   7
   1   1  -1 810.143 32.8550  14
  -1  -1   1 693.655 30.2472   3
   1  -1  -1 795.241 35.9097  12
  -1  -1   0 5388.22 104.223   3
  -1   1   0 5258.12 105.443   3
   1   1   0 5046.27 90.7434   7
  -1   1   0 5382.64 106.229   7
  -1  -1  -1 170.170 21.6785   9
  -1   1  -1 134.937 17.1937   7
  -1  -1  -1 117.429 17.8122   1
  -1   1  -1 149.739 19.2076   1
  -1   1  -1 87.1670 11.5132   9
  -1   1  -2 28423.7 460.110   7
   1   1   2 28730.4 467.554  11
  -1  -1  -2 28497.9 466.828   9
  -1   1  -2 27982.8 445.196   9
  -1  -1  -2 28585.1 453.143  10
  -1  -1  -3 6645.86 141.339  10
  -1   1  -3 6646.97 146.568  10
   1   1   3 6394.61 151.441  11
  -1  -1  -3 6697.39 151.510   9
  -1   1  -3 6537.15 144.452   7
   1  -1   4 700.814 44.8152   4
   1   1   4 736.718 47.4600  11
  -1   1  -4 745.298 45.7458  10
   1   1   4 818.810 45.9965   4
  -1  -1  -4 754.612 47.7683   9
  -1  -1  -5 1627.31 75.5812   9
  -1  -1  -5 1530.57 71.4302   8
  -1   1  -5 1512.25 73.4973  10
   1   1   5 1581.72 70.8373   4
   1  -1   5 1619.04 73.6505   4
   1   1   5 1541.55 74.6688  11
   1  -1   6 782.496 59.2521   4
  -1  -1  -6 916.971 61.4467   8
   1   1   6 794.551 58.0829  11
   1   1   6 851.282 58.7843   4
  -1   1  -7 1517.78 85.4721   8
   1  -1   7 1383.05 81.2251   4
   1   1   7 1429.65 86.0567  11
  -1  -1  -7 1480.85 86.0824   8
   1   1   7 1360.82 80.1269   4
  -1  -1  -8 191.530 36.0522   8
   1   1   8 240.024 39.1353   4
   1   1   8 187.517 36.3307  11
   1  -1   8 191.570 37.8860   4
  -1   1  -8 149.365 34.4549   8
  -1   1  -9 2102.30 119.510   8
   1   1   9 2195.56 118.135  11
  -1  -1  -9 2023.78 116.399   8
  -1  -1 -10 572.147 53.2690   6
  -1  -1 -10 590.347 70.2123   8
  -1   1 -10 568.293 69.0683   8
  -1  -1 -10 607.489 71.1524   2
  -1  -1 -10 637.339 55.4266  21
  -1   1 -10 674.546 55.9799   6
  -1   1 -10 777.662 77.9962   2
  -1  -1 -11 687.190 59.6173   6
  -1  -1 -11 637.363 56.8767  21
  -1   1 -11 752.805 60.4984   6
  -1  -1 -12 3227.52 124.561  21
  -1   1 -12 3415.08 129.964   6
  -1  -1 -12 3364.91 127.510   6
  -1  -1 -13 481.099 50.4552   6
  -1   1 -13 559.839 54.0979   6
   1   1  14 46.7580 24.9837  23
  -1  -1 -14 53.3228 25.9671   6
  -1   1 -14 38.8755 24.9891   6
   1   1  15 37.6448 18.9798  23
  -1   1 -15 1.93515 18.6547   6
  -1  -1 -15 28.2157 18.4700   6
  -1   1 -16 150.074 17.9820   6
   1  -2 -15 295.384 28.8340  21
   1  -2 -14 1673.56 77.5245  21
   1   2 -13 1479.09 76.6680   6
   1  -2 -13 1320.92 77.6838  21
   1  -2 -12 117.468 33.2167  21
   1  -2 -11 7532.32 208.078  21
  -1   2  10 3217.75 162.565  11
   1  -2 -10 3219.29 123.772  21
   1  -2  -9 1781.61 87.4856  21
   1   2  -9 1791.85 95.3251  26
  -1   2   9 1869.82 114.719  11
  -1   2   8 2089.77 116.261  11
   1  -2  -7 23167.6 470.341  15
  -1   2   6 3550.80 131.917  13
   1  -2  -6 3667.15 132.782  15
  -1   2   5 11484.7 264.909  13
   1  -2  -5 11764.4 258.240  15
   1  -2  -4 2072.16 79.9816  17
   1  -2  -4 2188.36 84.2621  15
  -1   2   4 2359.78 91.4646  13
  -1   2   3 12134.7 242.223  16
   1   2  -3 11699.5 225.506   7
   1  -2  -3 11496.5 238.969  15
  -1   2   3 11272.2 242.458  13
  -1   2   2 59607.4 938.637  13
  -1   2   2 59467.0 946.395  16
   1  -2  -2 59292.7 933.244  12
   1   2  -2 59862.0 923.242   7
   1  -2  -1 208338. 3107.64  12
   1   2  -1 208515. 3101.61   7
  -1   2   1 209856. 3125.24  16
  -1  -2   0 120793. 1818.21  17
   1   2   0 118750. 1810.29   7
  -1   2   0 121487. 1835.26  16
  -1   2   0 123128. 1829.36   7
  -1  -2  -1 46938.0 732.675   9
  -1   2  -1 44850.4 734.642   7
  -1   2  -1 46012.9 737.589  16
  -1  -2  -1 45446.3 728.532  17
  -1   2  -2 8920.67 186.667  16
  -1  -2  -2 9108.06 188.473   9
   1   2   2 8768.17 183.594  11
  -1   2  -2 8357.49 184.444   7
  -1  -2  -2 8435.49 183.782  17
  -1   2  -3 53791.3 872.879   7
  -1  -2  -3 53956.2 874.273   9
   1   2   3 55429.1 875.244  11
  -1   2  -3 53845.3 861.813  10
  -1   2  -4 16836.4 328.892   7
  -1   2  -4 16528.4 317.808  10
  -1  -2  -4 17060.8 332.620   9
   1   2   4 16676.6 335.311  11
   1   2   5 1850.97 91.7822  11
  -1   2  -5 1776.18 82.3656  10
  -1  -2  -5 1938.84 88.6967   9
  -1   2  -5 1850.50 86.2872   7
   1   2   6 26130.1 508.636  11
   1   2   7 18605.3 405.076  11
  -1   2  -7 18236.1 393.787   8
  -1   2  -8 324.489 44.6018   8
   1   2   8 293.553 47.3214  11
   1   2   9 850.311 80.4479  11
  -1  -2  -9 852.581 61.0177  21
   1   2  10 1795.78 119.986  11
   1   2  10 1706.88 88.5107  30
  -1  -2 -10 1968.51 95.7904  21
  -1  -2 -11 17263.6 367.596  21
   1   2  11 17368.7 363.198  30
  -1  -2 -12 640.212 57.6771  21
   1   2  12 621.496 53.4537  30
  -1   2 -12 722.916 59.3739   6
  -1   2 -13 572.056 50.7938   6
   1   2  14 968.520 62.9241  23
  -1   2 -14 920.451 57.1360   6
   1   2  15 1730.64 71.0354  23
  -1   3  15 107.243 20.1730  23
   1  -3 -14 225.140 30.5673  21
   1  -3 -13 396.121 44.0379  21
   1  -3 -12 1059.83 70.7665  21
   1  -3 -11 1959.86 98.3109  21
   1   3 -10 43.7378 30.3109  26
   1  -3 -10 75.6673 28.3756  21
   1  -3  -9 238.484 37.5887  21
   1   3  -9 193.853 37.4419  26
  -1   3   9 188.799 44.6101  11
  -1   3   8 1357.70 74.6103  28
   1  -3  -8 1518.88 77.7040  21
   1   3  -8 1411.36 84.2298  26
  -1   3   8 1306.71 96.4361  11
  -1   3   7 89.0872 32.2262  11
   1  -3  -5 2329.18 100.780  17
  -1   3   5 2249.27 102.898  13
  -1   3   4 455.010 44.5533  13
   1  -3  -4 516.851 46.2069  17
  -1   3   3 3450.41 114.960  13
  -1   3   2 7908.70 195.522  16
  -1   3   1 17.0134 18.5223  16
  -1   3   1 23.0582 17.7473   7
  -1   3   0 559.756 45.1524  16
  -1   3   0 507.052 43.0383   7
  -1  -3   0 514.876 38.5675  17
  -1  -3  -1 95.5054 23.0220  17
  -1   3  -1 69.5780 20.9870  16
  -1   3  -1 112.293 25.7797   7
  -1   3  -2 3786.62 119.177  16
  -1  -3  -2 3882.23 124.263  17
  -1   3  -2 4197.08 127.944   7
  -1  -3  -3 1012.05 64.6013  17
   1   3   3 1097.02 63.1125  11
  -1   3  -3 1237.34 69.5342   7
   1   3   4 2953.59 114.173  11
  -1   3  -4 2953.07 114.154   7
  -1   3  -5 505.276 50.3603   7
  -1  -3  -5 453.740 47.4855   9
   1   3   6 3140.63 134.498  11
   1   3   7 918.527 78.2859  11
   1   3   8 1496.01 103.823  11
   1   3   8 1438.63 78.5078  28
  -1  -3  -8 1573.42 79.2311  21
  -1  -3  -9 65.5548 29.5289  21
   1   3   9 41.1765 31.0641  11
  -1  -3 -10 46.2779 28.5037  21
   1   3  10 39.3574 26.9239  30
  -1  -3 -11 3212.49 126.665  21
   1   3  11 3481.88 130.997  30
  -1  -3 -12 1718.63 89.5563  21
   1   3  12 1887.75 90.9339  30
   1   3  13 119.551 31.2968  23
   1   3  13 80.7132 27.3533  30
   1   3  14 47.2385 21.8203  23
   1   3  14 16.8865 17.5151  30
   1   3  15 45.6034 15.7871  23
   1  -4 -14 16.6598 15.9911  21
  -1   4  14-4.32098 13.4418  30
   1  -4 -13 839.232 53.5697  21
  -1   4  13 886.728 54.1226  30
   1  -4 -12 40.0944 25.7699  21
   1  -4 -11 1935.07 93.0521  21
   1   4 -10 420.916 51.9706  26
   1  -4 -10 450.567 48.5414  21
  -1   4  10 443.813 48.5171  28
   1   4  -9 199.544 35.3560  20
   1   4  -9 226.622 40.3165  26
  -1   4   9 230.114 39.8220  28
   1   4  -8 3232.12 119.503  20
  -1   4   8 3242.15 123.268  24
  -1   4   8 3328.17 166.672  11
   1   4  -8 3219.86 136.067  26
  -1   4   8 3394.52 128.141  28
   1   4  -7 431.946 43.9287  20
  -1   4   7 471.743 47.6836  28
  -1   4   7 383.320 43.7929  24
  -1   4   7 457.027 59.2976  11
   1   4  -6 1846.61 82.6533  20
  -1   4   6 1734.46 84.2386  28
   1  -4  -5 686.984 64.1925  17
   1  -4  -4 1239.87 81.1797  17
   1  -4  -3 2786.60 122.048  17
  -1   4   2 2423.36 109.964   7
  -1   4   1 7269.77 202.332   7
  -1   4   1 7298.85 203.079  16
  -1   4   0 1107.09 70.4870  16
  -1   4   0 1283.22 77.2929   7
  -1  -4  -1 1157.99 72.7582  17
  -1   4  -1 1268.56 77.0164   7
  -1   4  -1 1305.20 75.1788  16
  -1   4  -2 684.354 57.6870   7
  -1  -4  -2 530.847 51.0645  17
  -1  -4  -3 5397.86 177.121  17
  -1   4  -3 5397.93 175.159   7
  -1   4  -4 2799.54 124.301   7
  -1   4  -5 99.6459 32.3784   7
   1   4   6 4147.71 137.836  28
  -1   4  -6 4273.51 170.977   7
   1   4   7 673.176 55.0471  31
   1   4   7 649.466 55.1634  28
   1   4   8 419.546 60.2146  11
  -1   4  -9 1162.11 70.2135  20
   1   4   9 1281.74 77.0272  30
  -1  -4 -10 214.635 36.2600  21
   1   4  10 156.214 37.2154  30
   1   4  11 440.757 48.3828  30
  -1  -4 -11 464.319 47.4821  21
   1   4  11 475.591 50.4152  23
   1   4  12 66.7349 27.1577  30
   1   4  12 75.5433 25.0668  23
   1   4  13 1670.09 75.2003  23
   1   4  13 1770.10 75.3223  30
   1   4  14 4.36419 13.2098  30
   1   4  14 15.2965 14.2759  23
  -1   5  13 579.273 36.5468  30
  -1   5  12 521.446 42.1887  30
  -1   5  11 268.568 36.4150  28
   1   5 -10 532.779 48.1656  20
   1   5 -10 541.003 55.1623  26
  -1   5  10 540.646 52.6364  28
   1   5  -9 38.2868 27.3700  26
   1   5  -9 29.4802 25.6148  20
  -1   5   9 6.63136 25.7678  28
   1   5  -8 103.027 33.1381  26
   1   5  -8 165.827 36.1560  20
  -1   5   8 153.391 36.4197  28
  -1   5   7 715.768 60.9604  28
  -1   5   7 713.949 59.0448  18
   1   5  -7 821.615 61.5204  20
  -1   5   7 785.868 62.3677  24
   1   5  -6 477.271 49.1641  20
  -1   5   6 446.665 49.7062  28
  -1   5   6 477.247 49.1863  18
  -1   5   6 501.805 50.0415  24
   1   5  -5 735.372 55.4478  20
  -1   5   5 755.314 58.6853  18
  -1   5   5 664.515 56.9379  24
   1   5  -5 694.809 62.1052  29
   1  -5  -5 679.578 71.7395  17
  -1   5   5 676.023 56.2350  28
   1  -5  -4 3362.89 153.843  17
   1   5  -4 3330.37 116.782  20
  -1   5   4 3308.92 120.980  24
  -1   5   4 3297.67 121.404  18
  -1   5   4 3456.72 156.571   7
   1   5  -4 3124.77 129.473  29
  -1   5   3 50.4128 22.6124  18
   1   5  -3 78.7374 27.6286  29
  -1   5   3 91.2397 26.3369  24
   1  -5  -3 114.386 37.4070  17
  -1   5   3 72.4464 30.8107   7
   1  -5  -2 166.625 39.6663  17
  -1   5   2 172.277 39.5857   7
  -1   5   1 619.753 63.8085   7
  -1   5   0 3223.54 144.280   7
  -1   5  -1 1316.87 90.6302   7
  -1  -5  -2 151.486 35.3651  17
  -1   5  -2 181.945 38.0327   7
  -1   5  -3 72.1122 28.8636   7
  -1   5  -4 735.001 71.3411   7
  -1   5  -5 2770.92 144.341   7
   1   5   6 85.4191 30.0667  31
  -1   5  -7 135.972 32.4682  20
   1   5   7 156.449 33.5258  31
   1   5   8 169.539 33.6013  31
  -1   5  -8 157.613 34.4957  20
  -1   5  -9 168.528 32.6303  20
   1   5   9 162.903 33.0817  30
   1   5  10 824.523 59.7617  30
  -1   5 -10 797.207 56.2789  20
   1   5  11 989.910 61.3268  30
  -1   5 -11 1030.35 57.9871  20
   1   5  12 42.1744 20.5404  30
   1   5  13 506.603 34.2115  30
  -1   6  12 941.849 40.9217  30
   1   6 -11 1229.61 55.6156  20
  -1   6  11 1287.24 57.3785  30
   1   6 -10 191.702 29.7396  20
   1   6 -10 204.344 32.1946  26
   1   6  -9 937.220 60.1617  20
   1   6  -9 788.941 61.3304  26
  -1   6   9 854.990 60.9645  28
   1   6  -8 2978.12 125.127  26
  -1   6   8 2880.42 116.883  28
   1   6  -8 2853.70 110.875  20
   1   6  -7 1568.56 93.9541  26
   1   6  -7 1406.91 79.3925  20
  -1   6   7 1525.91 84.5139  28
  -1   6   7 1484.63 84.2336  24
   1   6  -6 6168.61 178.814  20
  -1   6   6 6499.97 186.949  28
  -1   6   6 6422.20 186.763  24
   1   6  -5 323.625 41.3355  20
   1   6  -5 397.999 52.2858  29
  -1   6   5 419.442 48.0604  24
  -1   6   4 169.230 33.5421  24
   1   6  -4 159.871 39.0762  29
   1   6  -3 158.190 34.9387  29
  -1   6   3 123.813 32.5148  24
  -1   6   3 124.673 31.4455  18
   1   6  -2 671.852 61.2323  29
  -1   6   2 468.839 48.8276  24
   1   6  -1 3096.41 132.518  29
   1  -6  -1 2847.72 151.651  17
   1   6   0 2769.89 124.396  29
   1  -6   0 2753.29 146.493  17
   1   6   1 1508.78 91.5007  29
   1   6   2 2663.31 122.604  29
   1   6   3 835.215 68.7272  29
   1   6   5 96.1763 31.4293  31
  -1   6  -5 67.4037 26.4475  20
   1   6   6 1956.97 98.5465  31
  -1   6  -6 1954.87 92.4025  20
  -1   6  -7 715.171 56.8430  20
   1   6   7 610.659 57.6758  31
  -1   6  -8 2131.31 93.9204  20
   1   6   8 2108.97 96.8739  31
   1   6   9 816.192 57.0228  31
  -1   6  -9 894.703 58.1116  20
  -1   6 -10 328.138 34.5705  20
  -1   6 -11 1580.35 62.2038  20
   1   6  12 568.357 35.4201  29
   1   7  -9 68.1433 19.8751  20
   1   7  -9 31.2368 17.1052  26
   1   7  -8 910.094 53.3242  20
   1   7  -8 943.417 58.6901  26
   1   7  -7 4.55485 19.7863  20
   1   7  -7 2.90995 22.6126  26
   1   7  -6 42.2918 26.2362  26
   1   7  -6 34.2445 21.8975  20
  -1   7   6-2.75202 20.7616  24
  -1   7   5 78.5158 26.0557  24
  -1   7   4 17.9371 21.8496  24
   1   7  -4-7.39279 24.2294  29
   1   7  -3 241.858 42.4043  29
  -1   7   3 337.362 41.0236  24
   1   7  -2 58.5953 29.4792  29
   1   7  -1 27.5735 23.6374  29
   1   7   0 182.172 40.3488  29
   1   7   1 23.7773 26.3271  29
   1   7   2 90.6324 32.3666  29
   1   7   3 50.5087 30.2013  29
   1   7   3 53.4724 28.3693  31
   1   7   4 98.4560 31.8764  29
   1   7   4 6.27889 25.7716  31
   1   7   5 598.702 57.6875  29
   1   7   5 670.939 56.7340  31
   1   7   6 172.903 35.3605  29
  -1   7  -6 197.326 30.6117  20
   1   7   6 260.782 39.3000  31
  -1   7  -7 67.1621 23.6705  20
   1   7   7 82.4681 25.9336  31
   1   7   7 119.485 30.2845  29
  -1   7  -8 269.329 32.6273  20
   1   7   8 243.542 35.6408  29
   1   7   8 335.567 35.5351  31
  -1   7  -9 70.3724 19.3392  20
   1   7   9 54.4406 18.8957  31
   1   7   9 55.8053 20.8351  29
  -1   7 -10 85.4177 17.1984  20
   1   7  10 90.4303 17.6685  29
  -1   8   7 91.1882 18.4045  31
  -1   8   6 589.566 40.1294  31
   1   8  -6 546.094 39.5949  26
   1   8  -5 176.322 28.4073  26
  -1   8   5 156.283 26.4245  31
   1   8  -3 403.504 42.2168  29
   1   8  -2 38.0621 24.0349  29
   1   8  -1 69.7944 24.7095  29
   1   8   0 497.443 48.9508  29
   1   8   1 88.5856 29.1009  29
   1   8   2 80.5490 26.7304  29
   1   8   3 963.137 63.7130  29
   1   8   4 29.3753 20.9535  29
   1   8   4 21.3785 19.5516  31
   1   8   5 48.3535 21.6709  29
   1   8   5 111.438 23.6157  31
   1   8   6 251.214 28.3804  31
   1   8   6 180.419 27.2158  29
   1   8   7 315.627 29.7981  29
   1   8   7 286.743 26.7181  31
   1   9   0 13.2069 12.1479  29
   1   9   1 17.4722 13.0357  29
   1   9   2 102.176 17.4163  29
   2   0 -15 1.71654 17.3523   6
   2   0 -14 540.601 47.2871   6
   2   0 -13 20.3661 24.4889   6
   2   0 -12 6491.31 188.277   6
   2   0 -11 16.4503 26.2946   6
   2   0 -10 5458.83 173.080   6
   2   0  -9 5.78748 21.8284   6
   2   0  -9 4.91015 23.6632  15
   2   0  -8 8641.00 246.941  15
   2   0  -7-7.21166 19.0362  15
   2   0  -6 3409.36 124.863  15
  -2   0   5 2.54445 19.3884  13
   2   0  -4 31880.6 555.646  12
   2   0  -3 103.410 23.4263  12
   2   0  -2 10731.9 224.307  14
   2   0  -2 10531.8 225.968  12
  -2   0   1 6.87750 17.5779   3
   2   0  -1 12.0557 17.3113  14
  -2   0   0 25.3972 17.5044   3
  -2   0  -1 13.2639 15.9915   9
  -2   0  -1 98.7396 23.1402   1
  -2   0  -2 55232.9 888.948   9
  -2   0  -2 56791.4 895.602   1
  -2   0  -3 5.81755 16.4544   9
  -2   0  -4 73440.1 1167.16  10
  -2   0  -4 72758.7 1163.18   9
  -2   0  -5-5.57228 17.2473  10
  -2   0  -5 5.37579 16.6392   9
  -2   0  -6 1929.01 92.7837   9
  -2   0  -6 2111.52 99.3265  10
  -2   0  -8 995.557 81.1905   8
  -2   0  -9-14.7886 22.7622   6
  -2   0  -9-5.36014 25.1781   8
  -2   0 -10 43075.8 752.299   6
  -2   0 -11 20.1374 26.5789   6
  -2   0 -12 2390.41 107.956   6
  -2   0 -13-14.8221 27.4809   6
  -2   0 -14 6046.72 161.863   6
  -2   0 -15 8.52166 15.4760   6
   2   1 -15 225.023 26.4197   6
   2  -1 -15 202.854 26.2198   6
   2   1 -14 74.4428 25.0649   6
   2  -1 -14 114.631 27.1141   6
   2   1 -13 1317.38 73.9142   6
   2  -1 -13 1130.99 68.6806  21
   2  -1 -13 1242.13 73.0335   6
   2  -1 -12 3226.60 123.482   6
   2  -1 -12 2970.91 118.316  21
   2   1 -12 3083.15 121.562   6
   2   1 -11 963.629 68.7915   6
   2  -1 -11 801.542 64.5730   6
   2  -1 -11 890.029 66.1337  21
   2   1 -10 374.924 45.8993   6
   2  -1 -10 313.377 43.0626  21
   2  -1 -10 274.961 41.2173   6
  -2  -1  10 293.186 52.7648   4
   2  -1  -9 238.043 48.8280  15
   2   1  -9 259.586 37.2004   6
   2  -1  -9 199.157 37.9981   6
   2  -1  -9 251.173 37.3654  21
  -2   1   8 542.249 57.9151  13
   2  -1  -8 466.760 56.6052  15
   2  -1  -7 8460.98 236.099  15
  -2   1   7 8492.18 236.063  13
  -2   1   6 882.574 66.2031  13
   2  -1  -6 817.195 64.2915  15
  -2   1   5 500.423 47.5117  13
  -2   1   4 3343.05 115.835  13
   2  -1  -4 3666.20 119.941  12
   2   1  -3 5760.06 142.242  12
   2  -1  -3 6250.60 156.838  12
  -2   1   3 5906.42 152.753   3
  -2  -1   3 6059.37 152.225   3
   2   1  -2 6395.43 147.080  12
  -2   1   2 6453.52 154.622   3
  -2   1   2 6226.34 153.781  16
   2  -1  -2 6523.17 159.358  12
  -2  -1   2 6408.89 152.710   3
   2  -1  -2 6482.71 157.790  14
   2   1  -2 6376.30 154.000  14
   2  -1  -1 1047.56 53.3387  14
   2   1  -1 1021.71 50.9329  14
  -2  -1   1 1034.61 51.1729   3
  -2   1   1 1086.34 53.4276   3
  -2  -1   0 14213.0 264.822   3
  -2   1   0 13494.9 264.695   3
  -2   1  -1 1415.28 60.7818   1
  -2  -1  -1 1379.95 64.8493   9
  -2  -1  -1 1435.30 60.5611   1
  -2   1  -2 4155.69 118.977   1
  -2  -1  -2 4528.34 120.584   1
  -2  -1  -3 3501.85 103.483  10
  -2  -1  -3 3237.47 110.251   9
  -2  -1  -4 5138.91 152.449   9
  -2  -1  -4 5196.42 141.715  10
  -2   1  -4 5377.06 150.399  10
  -2   1  -5 2125.44 93.9317  10
  -2  -1  -5 2041.46 88.1831  10
  -2  -1  -5 2069.74 96.1733   9
  -2  -1  -6 3574.49 136.195   9
  -2   1  -6 3397.53 131.406  10
  -2   1  -7 1910.06 107.070  10
  -2  -1  -7 2467.89 114.042   8
  -2  -1  -8 833.183 72.1865   8
  -2   1  -9 2253.93 99.1015   6
  -2  -1  -9 2214.13 97.5322   6
  -2  -1  -9 2197.46 97.7879  21
  -2   1  -9 2259.27 129.727   8
  -2  -1  -9 2302.76 129.096   8
  -2  -1 -10 25.3285 28.1409   6
  -2   1 -10 58.0903 28.0448   6
  -2  -1 -11 1728.31 91.4695   6
  -2   1 -11 1832.59 94.5808   6
   2   1  11 1774.88 96.6525  23
  -2  -1 -12 1562.05 84.8207   6
   2   1  12 1424.07 85.9030  23
  -2   1 -12 1391.04 83.5598   6
   2   1  13 130.010 32.4808  23
  -2  -1 -13 151.798 31.6905   6
  -2   1 -13 129.487 34.8650   6
  -2  -1 -14 152.226 28.7647   6
  -2   1 -14 207.395 31.8118   6
   2   1  14 182.499 29.4606  23
   2   1  15 9.18090 13.8942   5
   2  -1  15 1.59850 14.5148   5
   2  -2 -15 258.687 25.0453  21
   2  -2 -14 825.798 51.9902  21
   2  -2 -13 335.994 40.8493  21
   2  -2 -12 246.112 40.5855  21
   2  -2 -11 386.670 48.5089  21
   2  -2 -10 716.487 60.9478  21
   2  -2  -9 3052.50 117.849  21
   2   2  -9 2820.92 126.183  26
  -2   2   8 1530.53 103.723  13
   2  -2  -8 1643.10 81.5766  21
   2  -2  -8 1557.45 104.203  15
   2   2  -8 1443.22 83.3211  26
  -2   2   7 1891.15 108.843  13
   2  -2  -7 1945.84 109.242  15
  -2   2   6 736.232 64.7504  13
   2  -2  -6 563.158 60.0651  15
  -2   2   5 6258.67 188.349  13
   2  -2  -5 6283.54 184.454  15
  -2   2   4 3661.37 127.846  13
  -2   2   3 4972.99 146.166  13
  -2   2   3 5125.71 143.871  16
   2  -2  -3 5036.81 145.923  12
   2  -2  -2 16562.8 324.844  12
  -2   2   2 16298.6 328.650  16
   2  -2  -1 132.797 27.0734  12
  -2   2   1 185.355 25.6135   7
  -2   2   1 157.300 27.9278  16
  -2   2   0 260.877 32.7467  16
  -2   2   0 255.547 28.3520   7
  -2  -2  -1 331.167 37.7899   9
  -2   2  -1 416.063 35.2212   7
  -2  -2  -2 4651.06 140.904   9
  -2   2  -2 4264.65 124.305   7
  -2   2  -3 625.477 46.0517   7
  -2  -2  -3 600.765 53.1397   9
  -2  -2  -4 779.498 60.4979   9
  -2   2  -4 804.895 54.7891   7
  -2   2  -5 3914.41 138.566  10
  -2  -2  -5 4395.77 152.275   9
  -2   2  -6 7158.40 209.450  10
  -2  -2  -6 7494.06 219.773   9
  -2   2  -7 2715.86 128.600  10
  -2  -2  -8 530.353 48.0432  21
   2   2   8 442.843 47.2333  30
   2   2   9 3289.64 124.731  30
  -2  -2  -9 3469.35 127.584  21
  -2   2  -9 3274.81 159.869   8
   2   2  10 1343.72 84.3624  23
   2   2  10 1444.27 81.8393  30
   2   2  11 54.0747 30.0960  30
   2   2  11 77.2840 33.8997  23
  -2   2 -11 82.3170 30.9121   6
  -2   2 -12 1301.96 76.0096   6
   2   2  12 1384.25 83.5667  23
   2   2  12 1290.63 74.9388  30
   2   2  13 29.5519 26.6471  23
  -2   2 -13 27.9152 24.0005   6
   2   2  14 25.0665 20.8546  23
  -2   2 -14 96.0766 22.0284   6
   2   2  15 167.033 22.2068  23
   2  -3 -14 650.038 42.4172  21
   2  -3 -13 417.226 42.1891  21
   2  -3 -12 407.912 46.5303  21
   2  -3 -11 25.7489 28.6037  21
   2  -3 -10 723.659 61.5553  21
   2   3 -10 812.849 69.8030  26
   2   3  -9 782.278 69.0718  26
  -2   3   9 822.702 62.6783  28
   2  -3  -9 799.363 63.6528  21
   2   3  -8 15.0042 28.5826  26
   2  -3  -8-18.0304 23.3516  21
   2  -3  -8 5.43029 23.4069  15
  -2   3   7 898.348 78.4164  13
   2  -3  -7 859.036 58.5180  21
   2   3  -7 902.011 57.9451  20
   2   3  -7 851.942 65.1344  26
   2  -3  -7 819.837 75.8435  15
  -2   3   6 483.831 56.7838  13
   2  -3  -6 318.148 46.1250  15
  -2   3   5 2551.62 120.379  13
  -2   3   4 5609.54 177.514  13
  -2   3   4 5432.45 173.303  16
  -2   3   3 4734.38 153.005  13
  -2   3   3 4877.65 157.700  16
  -2   3   2 768.715 55.2994  13
  -2   3   2 848.225 57.6640   7
  -2   3   2 869.503 62.8193  16
  -2   3   1 3015.14 116.476  16
  -2   3   1 3031.25 110.445   7
  -2  -3   0 1368.07 75.3460   9
  -2   3   0 1528.40 76.0814   7
  -2   3   0 1447.80 80.2934  16
  -2  -3  -1 4733.49 149.221   9
  -2   3  -1 5164.01 150.867   7
  -2   3  -1 4774.89 153.778  16
  -2   3  -2 382.026 42.4961  16
  -2  -3  -2 289.703 37.8323   9
  -2   3  -2 360.247 40.9156   7
  -2   3  -3 4277.97 143.505   7
  -2   3  -3 4496.02 146.596  16
  -2  -3  -3 4342.37 147.887   9
  -2  -3  -4 4256.19 153.077   9
  -2   3  -4 4132.11 145.778   7
  -2  -3  -5 1146.32 82.4451   9
  -2   3  -5 1274.57 83.0523   7
  -2  -3  -6 435.050 54.6564   9
   2   3   7 270.838 38.5821  23
  -2  -3  -7 256.136 36.2045  21
   2   3   7 265.590 35.9712  30
   2   3   7 252.902 37.3595  31
   2   3   8 130.798 33.1917  23
   2   3   8 159.667 33.3211  30
   2   3   9 777.170 65.9992  23
   2   3   9 808.540 63.7599  30
   2   3  10 1634.90 93.8573  23
   2   3  10 1591.01 87.6839  30
   2   3  11 161.476 37.1091  23
   2   3  11 100.930 30.4554  30
   2   3  12 1004.29 69.2938  23
   2   3  12 923.968 63.2694  30
   2   3  13 126.054 27.9289  30
   2   3  13 123.947 29.2419  23
   2   3  14 103.845 22.5245  23
   2  -4 -14 65.1751 15.7725  21
   2  -4 -13 666.168 44.0215  21
   2  -4 -12 960.632 60.0021  21
   2  -4 -11 389.334 43.2047  21
  -2   4  11 437.964 44.8154  28
   2  -4 -10 1385.35 80.8403  21
  -2   4  10 1424.32 81.7816  28
   2   4 -10 1361.69 87.7059  26
   2   4  -9 130.004 32.9962  20
  -2   4   9 156.946 35.4973  28
   2   4  -9 125.444 35.7499  26
  -2   4   8 16907.8 358.490  28
   2   4  -8 16641.1 348.168  20
   2   4  -8 16190.1 371.496  26
  -2   4   7 1650.87 113.735  11
   2   4  -7 1654.04 84.8133  20
  -2   4   7 1761.41 86.9596  18
   2   4  -7 1710.15 95.5642  26
   2   4  -6 1085.26 69.6367  20
  -2   4   6 1059.98 70.1875  18
   2   4  -5 2350.69 96.5664  20
  -2   4   5 2483.72 102.124  18
   2   4  -5 2519.12 109.438  29
  -2   4   3 3343.30 138.736   7
  -2   4   3 3106.77 140.871  16
  -2   4   2 58471.3 1013.03  16
  -2   4   2 58363.8 1001.54   7
  -2   4   1 9802.69 254.343   7
  -2   4   1 9059.71 257.049  16
  -2   4   0 37547.2 700.356  16
  -2   4   0 38301.9 695.372   7
  -2   4  -1 5645.32 186.848  16
  -2   4  -1 6071.08 189.831   7
  -2   4  -2 10899.4 277.814  16
  -2   4  -2 10504.2 281.861   7
  -2   4  -3 558.586 58.2850   7
  -2   4  -4 140.462 35.7708   7
   2   4   5 8498.88 216.102  31
  -2   4  -5 8682.69 258.796   7
   2   4   6 8088.96 211.596  31
  -2   4  -6 7573.03 248.422   7
   2   4   7 294.295 43.4285  31
   2   4   7 249.440 40.7715  30
   2   4   8 2011.35 104.855  31
   2   4   8 2256.32 105.237  30
   2   4   9 99.8962 31.6703  30
   2   4  10 3879.94 140.672  23
   2   4  10 4057.44 141.105  30
   2   4  11 113.389 30.3985  23
   2   4  11 158.690 32.8058  30
   2   4  12 1114.92 64.1216  23
   2   4  12 1057.78 62.1658  30
   2   4  13 208.705 27.3071  23
   2   4  13 222.682 28.0876  30
  -2   5  13-2.28038 12.1012  30
  -2   5  11 342.763 37.8530  28
   2   5 -10 350.035 38.8950  20
  -2   5  10 339.819 41.1206  28
   2   5 -10 308.571 43.0448  26
  -2   5   9 107.138 31.1444  28
   2   5  -9 56.4798 27.4139  20
   2   5  -9 86.2579 33.1014  26
   2   5  -8 1370.57 80.0910  20
  -2   5   8 1465.98 82.9930  18
  -2   5   8 1580.45 88.1133  28
   2   5  -8 1557.01 95.5109  26
  -2   5   8 1380.07 79.3854  24
  -2   5   7 84.2750 32.7122  28
   2   5  -7 71.3358 30.8339  20
  -2   5   7 69.1198 27.4960  18
   2   5  -7 80.9121 32.3503  26
  -2   5   7 74.0086 27.9776  24
  -2   5   6 179.256 36.5776  18
   2   5  -6 227.275 39.2509  20
  -2   5   6 155.124 33.6902  24
  -2   5   6 177.995 34.9046  28
   2   5  -5 20.7882 23.3004  20
  -2   5   5 15.9117 21.6916  24
  -2   5   5 22.8276 24.8513  18
   2   5  -5 31.3036 27.9720  29
  -2   5   5 28.3791 24.7398  28
  -2   5   4 101.957 30.2020  24
   2   5  -4 180.958 32.5813  20
  -2   5   4 94.4841 28.6535  18
   2   5  -4 121.874 34.1386  29
   2  -5  -4 115.102 35.2547  17
  -2   5   4 130.306 35.6341   7
   2  -5  -3 2223.93 126.319  17
  -2   5   3 2295.17 100.063  18
   2   5  -3 2348.45 110.443  29
  -2   5   3 2316.87 99.9519  24
  -2   5   3 2330.34 130.257   7
  -2   5   2 821.155 59.0951  24
   2   5  -2 736.947 62.0302  29
  -2   5   2 768.374 57.2645  18
  -2   5   1 14.2086 19.8469  24
   2   5  -1 3.48678 22.5454  29
  -2   5   1 30.2529 24.3002   7
  -2   5   0 209.564 32.3101  24
  -2   5   0 259.612 44.8058   7
   2   5   0 182.824 35.6061  29
  -2   5   0 266.518 47.3508  16
  -2   5  -1 104.871 26.4646  24
   2   5   1 89.6468 27.5856  29
  -2   5  -1 93.4385 32.2615  16
  -2   5  -1 64.9842 27.4976   7
  -2   5  -2 116.060 27.0165  24
  -2   5  -2 122.269 36.4542   7
   2   5   2 104.616 31.0328  29
  -2   5  -3 539.576 64.4398   7
  -2   5  -3 678.506 53.1142  24
   2   5   3 526.790 50.8151  31
   2   5   4 176.069 35.4396  31
  -2   5  -4 169.152 41.2379   7
   2   5   5-9.99878 25.8998  31
   2   5   6 579.829 56.1442  31
   2   5   7 398.768 48.3817  31
   2   5   8 656.410 58.7984  31
  -2   5  -9 132.256 31.1955  20
   2   5   9 118.064 29.4272  30
   2   5   9 128.734 30.4915  31
  -2   5 -10 436.152 42.6201  20
   2   5  10 455.211 44.1452  30
   2   5  11 2345.00 88.4080  30
   2   5  12 112.847 21.7450  30
  -2   6  11 489.388 32.8198  30
   2   6 -10 43.3934 20.6230  26
  -2   6  10 10.2849 18.5492  28
   2   6  -9 811.664 54.2805  20
   2   6  -9 734.762 56.9703  26
  -2   6   9 627.089 50.9105  28
   2   6  -8 151.144 32.2175  20
  -2   6   8 185.361 33.5020  28
   2   6  -8 118.311 33.2602  26
   2   6  -7 36.9402 28.4342  26
   2   6  -7 33.9123 24.9344  20
  -2   6   7 57.1315 27.6914  28
  -2   6   7 36.0608 25.5052  24
   2   6  -6 757.282 59.4898  20
  -2   6   6 664.338 57.8915  18
  -2   6   6 678.865 56.6969  28
  -2   6   6 736.487 59.0204  24
   2   6  -5 224.447 38.3542  20
  -2   6   5 238.907 38.8396  18
   2   6  -5 244.070 41.9540  29
  -2   6   5 266.192 40.9953  24
  -2   6   4 824.039 64.5504  18
   2   6  -4 895.043 73.6040  29
  -2   6   4 886.175 67.8189  24
  -2   6   3 417.223 48.0359  18
   2   6  -3 401.485 52.6016  29
  -2   6   3 407.148 49.5320  24
   2   6  -2 498.366 56.6210  29
  -2   6   2 510.187 50.9218  24
   2   6  -1 925.023 75.5112  29
  -2   6   1 758.211 60.6227  24
   2   6   0 67.4606 32.5690  29
  -2   6   0 6.29909 25.6266  24
   2   6   1 839.237 70.9489  29
  -2   6  -1 957.929 66.2832  24
  -2   6  -2 97.3962 27.0970  24
   2   6   2 142.322 36.6851  29
   2   6   3 2788.67 115.552  31
   2   6   3 2763.01 124.112  29
   2   6   4 314.558 43.3142  31
   2   6   4 243.288 42.2700  29
   2   6   5 161.395 35.7551  31
   2   6   5 142.641 35.3209  29
  -2   6  -6 151.993 33.2222  20
   2   6   6 168.086 36.9827  31
  -2   6  -7 88.2234 28.8274  20
   2   6   7 68.6400 28.9451  31
  -2   6  -8 435.875 43.5358  20
   2   6   8 410.971 43.8713  31
  -2   6  -9 1833.13 78.6757  20
   2   6   9 1753.48 79.7811  31
  -2   6 -10 157.767 25.0134  20
  -2   6 -11 84.1688 16.7356  20
   2   7  -9 199.519 25.1199  26
   2   7  -8 95.0882 23.3150  26
   2   7  -7 64.7328 24.1621  26
  -2   7   6 20.1762 21.4013  24
   2   7  -6 15.2602 21.8178  26
  -2   7   5 479.747 47.1425  24
   2   7  -4 495.156 54.4707  29
  -2   7   4 450.776 47.0056  24
   2   7  -3 40.5347 27.2343  29
  -2   7   3 62.4833 25.6619  24
   2   7  -2 109.576 32.8734  29
  -2   7   2 126.378 29.9451  24
  -2   7   1 92.9182 27.6383  24
   2   7  -1 118.217 33.4191  29
   2   7   0 826.547 68.4193  29
  -2   7   0 839.897 60.8642  24
   2   7   1 56.7428 28.5472  29
   2   7   2 215.850 40.0278  29
   2   7   3 68.7483 28.9344  29
   2   7   4 178.944 33.4856  31
   2   7   4 166.059 36.0412  29
   2   7   5 739.557 56.8878  31
   2   7   5 882.957 64.7688  29
   2   7   6 33.2734 24.5221  31
  -2   7  -6 36.5349 21.3599  20
   2   7   6 52.8501 23.4724  29
  -2   7  -7 17.5851 18.3571  20
   2   7   7 23.0181 19.0959  29
   2   7   7 4.54601 19.9004  31
  -2   7  -8 206.148 26.4918  20
   2   7   8 148.911 25.7074  29
   2   7   8 191.132 27.1070  31
  -2   7  -9 75.1811 17.6779  20
   2   7   9 86.3287 17.7590  31
  -2   8   6 46.9139 15.9072  31
   2   8  -6 99.4428 19.1617  26
   2   8  -5 438.504 37.0635  26
  -2   8   4 452.360 37.2612  24
  -2   8   3 1036.68 54.9145  24
   2   8  -2 623.133 50.3979  29
  -2   8   2 593.846 43.8752  24
   2   8  -1 226.605 33.4507  29
   2   8   0 77.3302 25.2787  29
   2   8   1 497.971 46.1026  29
   2   8   2 359.475 39.3289  29
   2   8   3 1328.76 69.6811  29
   2   8   4 1401.53 67.9510  29
   2   8   5 2067.31 77.5132  27
   2   8   5 2005.99 71.3738  31
   2   8   5 2134.57 79.2721  29
   2   8   6 18.5566 15.0965  27
   2   8   6 41.9351 15.4547  29
   2   8   6 31.2849 14.1425  31
   3   0 -15 106.355 17.3843   6
   3   0 -14-5.62499 19.1685   6
   3   0 -13 1392.59 72.4777   6
   3   0 -12-17.7555 23.8651   6
   3   0 -11 836.836 65.9142   6
   3   0 -10-6.57921 25.5629   6
   3   0  -9 5848.45 176.630   6
  -3   0   8 16.5003 23.7091   3
   3   0  -7 3583.33 152.133  15
  -3   0   7 3654.10 160.909   3
  -3   0   6 4.36534 20.5049   3
   3   0  -6 4.01939 19.8488  15
  -3   0   5 1582.13 94.9673   3
   3   0  -5 1259.77 81.9095  12
   3   0  -4 35.8514 21.3661  12
  -3   0   4 3.48648 24.6389   3
   3   0  -3 31173.4 559.490  12
  -3   0   3 30089.9 562.581   3
   3   0  -2 11.8130 20.8691  14
   3   0  -2-2.84244 18.1215  12
  -3   0   2 23.7558 23.2961   3
   3   0  -1 967.415 64.5974  14
  -3   0   1 1290.65 75.2206   3
  -3   0  -1 5716.73 163.030   9
  -3   0  -1 5961.62 167.302   1
  -3   0  -2 6.01006 24.0155   1
  -3   0  -2-2.76844 18.1467   9
  -3   0  -3 2710.05 113.431   9
  -3   0  -3 4789.35 161.953   1
  -3   0  -4-3.32050 17.8910  10
  -3   0  -4 9.58689 18.2221   9
  -3   0  -5 11980.5 291.081  10
  -3   0  -6 33.7235 22.7184  10
  -3   0  -7 3105.34 143.465  10
  -3   0  -8-3.08702 24.8940   6
  -3   0  -9 372.430 52.9608   6
  -3   0 -10 16.9687 27.3685   6
  -3   0 -11 2628.32 112.475   6
  -3   0 -12 21.0204 26.4893   6
   3   0  13 47.4415 24.2263   5
   3   0  14-1.85759 15.1130   5
   3   0  15 21.2276 10.9067   5
   3   1 -14 737.407 45.6045   6
   3  -1 -14 917.570 48.9429   6
   3   1 -13 816.111 54.7854   6
   3  -1 -13 892.418 57.0636   6
   3   1 -12 524.561 49.8815   6
   3  -1 -12 470.674 49.4172   6
   3  -1 -12 475.461 47.7353  21
   3   1 -11 332.356 46.0497   6
   3  -1 -11 274.439 40.3991  21
   3  -1 -11 318.204 44.3616   6
   3  -1 -10 3.20243 25.8248  21
   3   1 -10-3.22212 26.8955   6
   3  -1 -10 9.71816 25.6521   6
   3   1  -9 550.320 54.8168   6
   3  -1  -9 408.115 50.7517   6
   3  -1  -9 561.774 57.1630  21
   3  -1  -8 50.4703 26.0019  21
  -3  -1   8 49.3356 30.1303   3
  -3   1   8 38.5980 28.5066   3
   3  -1  -8 69.6089 29.4316  15
  -3   1   7 1519.61 103.228   3
   3  -1  -7 1762.95 83.2224  21
   3  -1  -7 1605.97 102.978  15
  -3   1   7 1719.66 105.729  13
  -3  -1   7 1573.00 103.371   3
  -3   1   6 1763.36 106.205   3
  -3   1   6 2109.80 112.655  13
   3  -1  -6 2129.46 113.255  15
  -3  -1   6 1744.22 104.747   3
  -3  -1   5 2326.30 112.798   3
  -3   1   5 2220.17 111.124   3
  -3   1   5 2602.29 118.943  13
   3  -1  -5 2297.59 115.789  12
  -3  -1   4 705.189 60.3543   3
  -3   1   4 767.394 64.2540   3
   3  -1  -4 569.962 58.8014  12
  -3  -1   3 2727.32 118.741   3
  -3   1   3 2571.00 114.179   3
   3  -1  -2 764.759 56.8832  14
   3  -1  -2 670.932 55.0587  12
   3   1  -2 740.344 52.6165  12
  -3  -1   2 637.637 51.9967   3
  -3   1   2 682.685 56.0512   3
   3   1  -2 721.738 55.1757  14
   3   1  -1 336.890 39.1132  14
   3  -1  -1 351.080 40.3995  14
  -3  -1   1 392.793 44.5615   3
  -3   1   1 402.265 46.9357   3
   3   1   0 85.7581 24.9831  14
   3  -1   0 111.627 25.6611  14
  -3  -1  -1 1295.79 77.4311   9
  -3  -1  -1 1327.63 72.7204   1
  -3   1  -1 1322.35 74.0919   1
  -3   1  -2 139.639 31.2228   1
  -3  -1  -2 81.8254 27.5550   1
  -3  -1  -2 76.5052 30.7579   9
  -3  -1  -3 14785.4 299.906   9
  -3   1  -3 13575.8 305.318   1
  -3   1  -4 4486.43 154.312  10
  -3  -1  -4 4506.79 158.197   9
  -3   1  -5 766.598 65.4187  10
  -3  -1  -5 733.694 67.0143   9
  -3   1  -6 1394.40 93.3215  10
  -3  -1  -6 1455.33 94.9850   9
  -3  -1  -7 799.317 58.8424   6
  -3   1  -7 886.298 61.9976   6
   3   1   7 883.028 60.0236  30
   3   1   7 949.273 65.0604  23
  -3   1  -7 793.119 73.6171  10
  -3  -1  -7 882.305 77.5222   9
   3   1   8 100.767 30.7458  23
   3   1   8 92.6242 28.8331  30
  -3  -1  -8 78.9840 28.1961   6
  -3   1  -8 99.4333 28.0507   6
  -3   1  -8 121.924 37.3226  10
  -3  -1  -9 5617.60 172.036   6
  -3   1  -9 5496.25 173.160   6
   3   1   9 5867.05 181.267  23
   3   1   9 5701.72 169.918  30
   3   1  10 273.179 42.5986  23
  -3  -1 -10 256.247 41.6080   6
  -3   1 -10 255.567 43.3458   6
   3   1  10 247.464 38.3759  30
   3   1  11 686.829 60.1444  23
  -3  -1 -11 647.288 57.3042   6
  -3   1 -11 760.990 61.3486   6
   3   1  12 558.929 51.9370  23
  -3  -1 -12 608.920 53.2418   6
  -3   1 -12 675.458 56.9843   6
   3  -1  13 240.235 33.5255   5
   3   1  13 304.655 36.1668  23
   3   1  14 18.4620 15.6648   5
   3  -1  14 12.2990 16.0673   5
   3  -2 -14 191.440 24.4170  21
   3  -2 -13 1185.59 63.5633  21
   3  -2 -12 65.8620 26.3022  21
   3  -2 -11 485.915 53.6522  21
   3  -2 -10 1428.90 82.3288  21
   3  -2  -9 12118.3 285.621  21
  -3   2   8 2579.79 144.408  13
   3  -2  -8 2891.88 115.576  21
   3  -2  -8 2546.93 143.363  15
  -3   2   7 1283.18 99.3901  13
   3  -2  -7 1575.37 81.8751  21
   3  -2  -7 1482.15 103.632  15
  -3   2   6 883.554 76.1204  13
   3  -2  -6 756.199 70.5366  15
  -3   2   5 3440.25 146.721  13
  -3   2   4 997.255 73.3291  13
   3  -2  -4 827.330 67.9842  12
   3  -2  -3 8412.49 228.424  12
   3  -2  -2 7099.58 200.768  12
  -3   2   2 6954.66 196.687  16
   3  -2  -1 13493.1 304.832  12
  -3   2   1 13552.3 310.252  16
  -3  -2   0 11321.6 276.917   9
  -3   2   0 11363.0 262.522   1
  -3   2  -1 2820.25 112.251   1
  -3  -2  -1 2770.23 126.144   9
  -3  -2  -2 3603.64 140.917   9
  -3   2  -2 4081.18 145.609   1
  -3  -2  -3 21824.8 453.824   9
  -3  -2  -4 591.739 59.4947   9
  -3   2  -5 662.221 66.0364  10
  -3  -2  -5 616.713 66.3089   9
  -3   2  -6 812.551 74.3796  10
  -3  -2  -6 905.940 78.9522   9
  -3   2  -7 2722.08 139.597  10
  -3  -2  -7 2851.23 146.179   9
   3   2   7 2753.74 110.676  31
   3   2   7 2677.79 108.900  30
   3   2   7 2822.14 116.366  23
   3   2   8 2274.41 108.517  23
   3   2   8 2402.12 106.558  30
   3   2   9 15450.0 345.737  23
   3   2   9 15068.1 333.188  30
  -3   2  -9 15184.8 330.589   6
   3   2  10 1062.83 76.0746  23
   3   2  10 1058.52 71.9133  30
  -3   2 -10 930.229 67.3659   6
   3   2  11 3272.85 130.998  23
   3   2  11 3322.58 123.583  30
  -3   2 -11 3515.96 125.821   6
   3   2  12 81.2561 27.9142  23
   3  -2  12 54.2473 23.4753   5
   3   2  13 4962.67 142.421  23
   3   2  14 283.242 28.4740  23
   3  -3 -14 7.30650 12.0989  21
   3  -3 -13 736.706 46.6696  21
   3  -3 -12 288.591 37.4516  21
   3  -3 -11 93.0178 31.0391  21
   3  -3 -10 812.707 63.6441  21
   3  -3  -9 2958.01 120.130  21
   3   3  -9 2860.20 126.072  26
   3  -3  -8 96.3117 31.7387  21
  -3   3   7 311.963 53.9713  13
   3  -3  -7 268.867 40.5236  21
   3  -3  -7 250.926 49.7134  15
  -3   3   6 38.3239 30.1028  13
   3  -3  -6 62.8819 29.7235  21
  -3   3   6 91.1688 28.8933  18
   3  -3  -6 122.712 37.7892  15
   3   3  -5 1999.46 89.2733  20
  -3   3   5 2125.78 93.1332  18
   3  -3  -5 1866.92 110.436  15
  -3   3   4 1008.28 78.9724  13
  -3   3   3 729.293 65.0757  13
  -3   3   3 907.094 70.7867  16
  -3   3   2 69.7272 27.6213  16
  -3  -3   1 1892.48 105.275   9
  -3   3   1 2004.88 105.774  16
  -3  -3   0 2223.68 113.608   9
  -3   3   0 2475.81 119.175  16
  -3  -3  -1 676.553 63.1929   9
  -3   3  -1 532.821 57.6775  16
  -3  -3  -2 188.146 38.9603   9
  -3   3  -2 255.367 41.0545  16
  -3  -3  -3 433.995 52.9185   9
  -3   3  -3 368.691 48.9304  16
  -3   3  -4 593.478 63.1936  10
  -3  -3  -4 557.109 61.9885   9
  -3  -3  -5 572.119 65.1036   9
   3   3   5 553.396 50.2832  31
   3   3   6 1011.70 68.7887  23
  -3  -3  -6 1108.81 92.1227   9
   3   3   6 983.489 66.3869  31
   3   3   6 1044.29 66.7773  30
   3   3   7 299.785 40.5949  23
   3   3   7 299.972 40.9298  31
   3   3   7 340.553 42.7001  30
   3   3   8 477.915 52.9468  23
   3   3   8 429.118 47.9234  31
   3   3   8 463.236 49.0390  30
   3   3   9 369.802 48.7336  23
   3   3   9 503.058 53.6357  30
   3   3  10 17.4665 27.4118  23
   3   3  10 72.3944 32.3618  30
   3   3  11 1118.64 72.8487  23
   3   3  11 1189.05 70.9416  30
   3   3  12 172.115 31.4888  23
   3   3  13 49.9927 20.4563  23
   3   3  14 41.2856 13.0154  23
   3  -4 -13 181.720 21.9660  21
   3  -4 -12 24.6030 18.4713  21
   3  -4 -11 197.960 31.3651  21
  -3   4  11 146.920 27.4105  28
   3  -4 -10 324.817 41.9943  21
  -3   4  10 306.139 40.4414  28
   3  -4  -9 445.749 51.1486  21
  -3   4   9 444.075 51.2145  28
   3   4  -8 57.8720 31.9461  26
  -3   4   7 1566.73 87.6696  18
   3   4  -7 2280.11 111.304  26
   3   4  -6 3.06096 27.4007  20
  -3   4   6 32.5000 28.6681  18
   3   4  -5 1788.09 88.9357  20
  -3   4   5 2236.22 99.9971  18
   3   4  -4 175.791 32.6131  20
  -3   4   4 231.219 34.8101  18
   3  -4  -3 882.904 59.4200  22
  -3   4   3 867.013 60.6586  18
  -3   4   3 839.943 77.8546  16
   3  -4  -2 842.196 59.0886  22
  -3   4   2 892.735 60.9711  18
  -3   4   2 845.819 79.4557  16
  -3   4   2 772.265 56.2055  24
  -3   4   1 263.159 51.3081  16
  -3   4   1 269.148 35.8505  24
  -3   4   0 305.501 48.4782  16
  -3   4  -1 1969.05 115.807  16
  -3   4  -1 2007.95 88.5671  24
  -3   4  -2 2135.08 120.103  16
   3   4   3 379.728 43.7325  31
   3   4   4-9.35856 22.5509  31
   3   4   5 206.392 39.8994  31
   3   4   6 657.630 56.9377  31
   3   4   7 4664.48 153.394  30
   3   4   7 5085.56 163.764  31
   3   4   8 149.950 32.7257  30
   3   4   8 180.299 37.4677  31
   3   4   9 3273.39 127.750  23
   3   4   9 3679.50 129.945  30
   3   4   9 3614.30 130.536  31
   3   4  10 230.992 36.1105  23
   3   4  10 212.957 36.1578  30
   3   4  11-7.56806 20.3436  23
   3   4  11-9.45555 22.7845  30
   3   4  12 385.403 34.9074  23
   3   4  13-1.28497 11.5021  23
  -3   5  11 46.3640 18.5439  28
  -3   5  10 1213.58 65.3457  28
  -3   5   9 44.0764 26.5751  28
   3   5  -9 118.124 30.5986  26
  -3   5   8 20.3539 23.2411  18
  -3   5   8 18.3579 26.7887  28
   3   5  -8 46.0541 27.7952  26
  -3   5   7 89.1710 29.3622  18
  -3   5   7 100.169 31.5688  28
   3   5  -7 135.246 35.5580  26
  -3   5   6 676.234 58.0482  18
  -3   5   6 585.062 57.0754  28
   3   5  -6 612.372 61.3984  26
  -3   5   5 85.3718 28.5369  24
  -3   5   5 91.1354 28.2044  18
  -3   5   4 3885.59 140.363  18
  -3   5   4 3933.81 138.965  24
  -3   5   3 246.979 41.3235  24
  -3   5   3 369.994 46.6080  18
  -3   5   2 561.980 52.7490  18
  -3   5   2 642.328 55.4116  24
  -3   5   1 9.39206 22.8818  24
  -3   5   1 11.9459 23.2078  16
  -3   5   0 1246.25 103.214  16
  -3   5   0 1405.36 79.3728  24
  -3   5  -1 9.31973 21.6963  24
  -3   5  -1 17.7066 26.2248  16
  -3   5  -2 130.908 31.5661  24
  -3   5  -3 912.762 63.9876  24
   3   5   3 860.242 64.0257  31
   3   5   4 708.828 62.6383  31
  -3   5  -4 1023.26 68.3004  24
   3   5   5 61.2606 27.4597  31
   3   5   6 40.8015 29.0883  31
   3   5   7 42.7528 27.4582  31
   3   5   8 265.000 39.3061  31
   3   5   9 542.597 47.5036  31
  -3   5 -10 1502.31 66.8450  20
  -3   6  10 56.9243 17.9951  28
  -3   6   9 796.597 49.6877  28
   3   6  -9 971.651 57.5854  26
  -3   6   8 106.655 26.3766  28
   3   6  -8 123.714 30.1131  26
  -3   6   7 47.9208 23.1446  18
  -3   6   7 41.3820 25.0976  28
   3   6  -7 96.8050 28.3669  26
  -3   6   7 52.0430 22.1990  24
  -3   6   6 339.614 42.4802  18
  -3   6   6 307.656 39.7815  28
   3   6  -6 343.664 46.6263  26
  -3   6   6 321.955 40.7416  24
  -3   6   5 1124.31 70.6420  18
  -3   6   5 1032.03 68.6031  24
  -3   6   4 5022.53 159.778  18
  -3   6   4 4978.95 159.829  24
  -3   6   3 906.920 66.8457  18
  -3   6   3 786.310 64.4289  24
   3   6  -2 11951.9 298.030  29
  -3   6   2 12820.1 289.714  24
  -3   6   1 4737.73 155.678  24
   3   6   0 388.806 48.8385  27
  -3   6   0 417.815 47.5836  24
  -3   6  -1 1076.12 71.6380  24
  -3   6  -2 2174.20 100.764  24
  -3   6  -3 4381.75 144.455  24
   3   6   4 10615.9 254.038  31
  -3   6  -4 10372.0 248.046  24
  -3   6  -5 184.836 31.9818  24
   3   6   5 159.300 36.4024  31
   3   6   6 208.015 36.4009  31
   3   6   7 446.411 44.2435  31
  -3   6  -8 219.807 30.9045  20
   3   6   8 180.303 30.2106  31
   3   6   9 389.238 35.4579  31
  -3   6  -9 457.709 35.8672  20
  -3   6 -10-1.26578 12.6494  20
   3   7  -8 72.4703 17.5933  26
   3   7  -7 62.4878 19.8106  26
   3   7  -6 145.038 27.9874  26
  -3   7   6 69.0314 22.1346  24
   3   7  -5 146.860 29.4022  26
  -3   7   5 110.206 25.9436  24
  -3   7   4 1142.08 65.1198  24
  -3   7   3 1065.57 64.5926  24
   3   7  -2 422.004 46.3532  29
  -3   7   2 451.705 45.3261  24
   3   7  -1 760.719 60.2322  29
  -3   7   1 751.304 56.4098  24
   3   7   0 499.221 49.8507  29
  -3   7   0 444.348 45.0941  24
  -3   7  -1 227.686 35.4749  24
   3   7   1 288.659 40.7346  29
   3   7   1 234.457 36.9219  27
   3   7   2 982.321 66.9352  27
  -3   7  -2 1040.24 62.0747  24
  -3   7  -3 66.5594 24.3206  24
   3   7   3 64.4752 28.6144  27
   3   7   4 72.0958 30.3445  27
   3   7   5 501.985 41.4107  31
   3   7   5 473.238 44.5693  27
  -3   7  -6 414.998 33.4615  20
   3   7   6 374.593 35.1961  31
   3   7   6 395.383 37.7720  27
   3   7   7 65.8669 19.2004  31
  -3   7  -7 69.8622 18.4516  20
  -3   7  -8 93.7607 16.5583  20
   3   8  -4 234.455 25.6522  26
  -3   8   4 223.501 23.3610  24
   3   8  -3 3.51722 13.9261  26
  -3   8   3-1.49776 13.5037  24
  -3   8   2 406.947 32.4937  24
  -3   8   1 65.3453 18.4042  24
  -3   8   0 37.0601 15.7324  24
   3   8   0 35.2173 17.2658  29
  -3   8  -1-6.10859 13.5710  24
   3   8   1-9.51059 15.2017  29
   3   8   2 529.986 37.6548  27
   3   8   3 9.89999 14.5547  27
   3   8   4 444.269 32.1870  27
   4   0 -14 64.7074 14.5077   6
   4   0 -13-19.5597 17.9774   6
   4   0 -12 141.476 29.1560   6
   4   0 -11-16.9362 24.5247   6
   4   0 -10 12732.8 290.697   6
   4   0  -9 6.56707 25.2692   6
   4   0  -7-15.0579 23.8490  21
  -4   0   6 1024.91 103.582   3
   4   0  -5 4.91364 22.4649  12
  -4   0   5 5.29301 25.5083   3
   4   0  -4 6442.49 212.224  12
  -4   0   4 6649.72 222.046   3
   4   0  -3 17.3353 22.3983  12
  -4   0   3 9.37956 26.7427   3
   4   0  -2 28682.3 573.386  12
  -4   0   2 29275.7 582.956   3
   4   0  -2 29470.3 581.430  14
   4   0  -1 46.8662 25.1566  14
   4   0   0 2461.63 120.477  14
  -4   0   0 2499.45 120.928   1
   4   0   1 4.28831 20.6663  14
  -4   0  -1-4.27417 22.5641   1
  -4   0  -2 11550.0 307.573   1
  -4   0  -3 5.33311 25.7016   1
  -4   0  -4 778.696 77.6516  10
  -4   0  -5 4.90747 21.1536  10
   4   0   5-14.7324 21.9983   5
  -4   0  -6 9301.73 281.536  10
   4   0   6 9175.68 231.239   5
   4   0   7 16.3561 23.3841   5
   4   0   8 2843.72 118.730   5
   4   0   9 20.1011 23.3986   5
   4   0  10 3495.92 130.441   5
   4   0  11 2.84056 21.2074   5
   4   0  12 3626.83 116.896   5
   4   0  13 17.4080 16.4630   5
   4   1 -13 171.296 24.5335   6
   4  -1 -13 147.162 23.8863   6
   4   1 -12 330.067 35.5516   6
   4  -1 -12 295.831 35.3885   6
   4  -1 -12 327.376 35.2017  21
   4  -1 -11 177.150 33.3193  21
   4   1 -11 147.928 30.6357   6
   4  -1 -11 184.944 33.5079   6
   4   1 -10 1430.02 79.1840   6
   4  -1 -10 1394.91 79.5171   6
   4   1  -9 1361.69 80.6290   6
   4  -1  -9 1300.03 80.2410   6
   4  -1  -9 1233.81 76.3992  21
   4  -1  -8 16.1760 30.5929  21
   4  -1  -7 199.808 35.3088  21
  -4   1   6 394.729 57.3969  13
  -4  -1   6 402.270 58.8019   3
  -4   1   6 286.395 54.4225   3
   4  -1  -6 376.391 55.8881  15
  -4   1   5 1009.52 85.9901  13
   4  -1  -5 1109.06 89.1901  12
  -4  -1   5 990.411 85.4644   3
  -4   1   5 898.285 84.5733   3
   4  -1  -4 39.1466 31.2026  12
  -4  -1   4 29.6095 32.7881   3
  -4   1   4 70.0372 38.5041   3
   4  -1  -3 943.651 80.0806  12
  -4  -1   3 1033.41 82.4094   3
  -4   1   3 1030.23 83.6303   3
   4  -1  -2 500.389 61.6895  12
   4   1  -2 542.609 59.9611  14
   4  -1  -2 427.587 53.9178  14
   4  -1  -1 573.594 60.3208  14
   4   1  -1 701.677 63.3072  14
   4   1   0 361.192 48.3250  14
   4  -1   0 337.349 48.4242  14
  -4  -1   0 299.425 44.5963   1
  -4   1   0 296.716 46.3558   1
  -4  -1   0 263.830 46.9810   9
   4   1   1 29.7352 25.0815  14
   4  -1   1 61.3121 30.2260  14
  -4  -1  -1 36.0674 37.9507   9
  -4   1  -1 35.0983 29.1518   1
  -4  -1  -1 77.4323 32.4567   1
  -4  -1  -2 4345.31 170.887   9
  -4   1  -2 4447.21 173.913   1
  -4  -1  -2 4447.84 172.423   1
  -4  -1  -3 3580.75 153.154   9
   4   1   4 865.863 61.9997  23
  -4   1  -4 779.495 73.8645  10
  -4  -1  -4 881.560 76.8550   9
   4   1   5 940.192 66.8604  23
  -4   1  -5 909.459 80.9475  10
  -4  -1  -5 851.153 79.7123   9
   4   1   5 910.750 61.7260   5
   4  -1   5 901.513 63.2455   5
   4   1   6 140.641 33.7475  23
  -4   1  -6 185.212 42.8220  10
   4   1   6 168.338 32.5572   5
   4  -1   6 119.339 31.0939   5
   4   1   7 285.179 41.8777  23
   4   1   7 230.069 38.3525   5
   4  -1   7 216.378 38.2143   5
   4   1   8 1163.23 76.9792  23
   4  -1   8 1166.74 74.1945   5
   4   1   8 1123.01 72.0026   5
   4   1   9 2648.56 117.251  23
   4   1   9 2485.10 109.359   5
   4  -1   9 2720.34 114.526   5
   4   1  10 255.276 38.6922  23
   4   1  10 297.042 40.8680   5
   4  -1  10 283.932 40.9681   5
   4   1  11 575.017 50.4655  23
   4   1  11 515.621 47.7250   5
   4  -1  11 560.380 49.2683   5
   4   1  12 131.375 26.1137  23
   4   1  12 108.292 23.9860   5
   4  -1  12 139.719 26.5544   5
   4   1  13 54.3400 16.6750   5
   4  -1  13 82.2594 19.2827   5
   4  -2 -13 309.576 28.3383  21
   4  -2 -12 221.616 30.8549  21
   4  -2 -11 59.5260 27.1973  21
   4  -2 -10 2017.03 93.8441  21
   4  -2  -9 38.4574 26.5329  21
   4  -2  -8 39.5016 30.9299  21
   4  -2  -7 1984.29 97.6707  21
  -4   2   6 524.166 66.8671  13
   4  -2  -6 401.415 46.4396  21
   4  -2  -6 506.030 65.0117  15
  -4   2   5 17.0227 26.6534  13
  -4   2   5 6.08809 21.0047  18
  -4   2   4 4929.20 194.035  13
   4  -2  -4 4692.92 189.224  12
   4  -2  -4 4552.29 144.098  22
  -4   2   4 4790.87 151.378  18
   4  -2  -3 1516.40 101.879  12
   4  -2  -3 1569.22 77.9395  22
   4   2  -3 1663.84 87.2119  19
  -4   2   3 1586.31 79.7489  18
   4  -2  -2 230.070 46.0321  12
   4  -2  -1 1172.26 90.0940  12
  -4  -2   1 981.248 88.4981   9
  -4  -2   0 705.476 73.0384   9
  -4   2   0 566.954 64.4913  16
  -4  -2  -1 5380.16 200.084   9
  -4  -2  -2 1455.94 101.742   9
   4   2   3 653.013 56.3912  23
  -4  -2  -3 699.815 70.5267   9
   4   2   4 1127.09 72.3079  23
  -4   2  -4 1098.04 92.1199  10
  -4  -2  -4 888.876 83.0661   9
   4   2   5 270.451 40.0998  23
  -4   2  -5 322.521 51.0000  10
  -4  -2  -5 224.888 47.4615   9
   4   2   6 225.081 37.8657  23
   4   2   7 6627.16 199.871  23
   4   2   8 1342.52 83.6830  23
   4  -2   8 1089.60 70.8799   5
   4   2   9 24.9453 25.4748  23
   4  -2   9 18.5076 22.3002   5
   4   2  10 114.470 33.6536  23
   4  -2  10 93.1707 27.9245   5
   4   2  11 873.559 60.2750  23
   4  -2  11 770.428 53.2110   5
   4   2  12 84.1362 22.9052  23
   4  -2  12 52.7203 18.9494   5
   4   2  13 53.1164 16.3724  23
   4  -3 -13 148.393 18.1654  21
   4  -3 -12 158.453 24.7176  21
   4  -3 -11 890.711 56.2545  21
   4  -3 -10 255.880 36.3298  21
   4  -3  -9 116.950 36.8839  21
   4  -3  -8 6.32019 23.5931  21
   4  -3  -7 1474.36 84.6780  21
   4  -3  -6 6.32179 25.0309  21
  -4   3   6 13.0602 22.2532  18
  -4   3   5 1233.04 75.6121  18
  -4   3   4 1392.66 106.086  13
   4  -3  -4 1155.42 72.7841  22
  -4   3   4 1266.00 76.7820  18
  -4   3   3 310.281 53.7120  13
   4  -3  -3 395.405 43.5214  22
   4   3  -3 371.371 46.9004  19
  -4   3   3 375.243 44.9008  18
   4  -3  -2 252.847 36.5580  22
  -4  -3   2 233.735 49.6973   9
   4   3  -2 210.604 36.7613  19
  -4   3   2 223.971 35.8888  18
   4   3  -2 257.930 38.5299  27
  -4   3   2 204.895 44.3472  16
   4  -3  -1 87.3444 24.1204  22
  -4  -3   1 103.371 42.4384   9
   4   3  -1 102.057 32.8047  19
  -4   3   1 29.1954 22.7096  18
   4   3  -1 59.3734 29.5434  27
  -4   3   1 79.6086 34.3297  16
   4  -3   0 271.451 37.2880  22
  -4  -3   0 307.454 53.0036   9
   4   3   0 302.807 41.0703  27
  -4   3   0 193.421 42.7246  16
  -4  -3  -1 580.251 69.7752   9
   4   3   1 661.619 56.6396  27
  -4   3  -1 538.784 65.6139  16
  -4  -3  -2 281.556 52.0262   9
   4   3   2 338.655 43.8536  27
  -4   3  -2 254.642 47.8217  16
  -4  -3  -3 1019.19 90.2999   9
   4   3   3 1063.19 67.6163  31
   4   3   3 990.548 69.5752  27
  -4   3  -3 1023.45 90.1629  16
   4   3   4 1280.24 78.3970  23
   4   3   4 1207.24 76.1327  31
  -4   3  -4 1156.57 98.2236  16
   4   3   5 1113.64 74.9415  23
   4   3   5 1236.11 76.9705  31
   4   3   6 379.681 47.1105  23
   4   3   6 359.812 45.8475  31
   4   3   7 1273.11 82.3536  23
   4   3   8-7.04810 24.9024  23
   4   3   9 3734.88 137.511  23
   4   3  10 70.3398 27.5526  23
   4   3  11 157.792 28.8683  23
   4   3  12 1.82284 14.5677  23
   4  -4 -11 89.8273 19.9240  21
   4  -4 -10 432.060 39.9538  21
  -4   4  10 418.935 39.8351  28
   4  -4  -9 79.2105 26.9615  21
  -4   4   9 68.9125 25.5694  28
  -4   4   7 83.9424 30.1774  18
  -4   4   6 1039.31 70.9229  18
  -4   4   5 1274.96 79.6308  18
  -4   4   4 2659.10 115.288  18
   4  -4  -3 2997.36 118.223  22
  -4   4   3 2665.96 115.452  18
   4   4  -2 906.164 76.7218  19
  -4   4   2 873.165 71.1246  18
   4  -4  -1 1864.51 92.3046  22
  -4   4   1 1931.98 92.6524  18
   4   4  -1 2116.07 103.864  27
  -4   4   0 200.499 34.5560  24
   4  -4   0 236.746 37.1935  22
   4   4   0 166.208 36.0174  27
  -4   4  -1 100.187 35.5698  24
   4  -4   1 159.627 36.2006  22
   4   4   1 54.9236 32.8097  27
   4  -4   2 19427.0 395.920  22
   4   4   2 19607.5 414.129  27
  -4   4  -2 19736.0 395.552  24
   4   4   3 3837.77 146.082  27
   4   4   4 3513.68 132.510  31
   4   4   4 3656.18 141.379  27
   4   4   5 74.3172 30.0378  31
   4   4   6 814.602 65.3747  31
   4   4   7 1222.36 76.4889  31
   4   4   8 3515.55 126.916  23
   4   4   9 1613.10 79.6465  23
   4   4  10 2433.17 91.4884  23
   4   4  11 172.849 23.9150  23
  -4   5  10 3.13346 14.0243  28
  -4   5   9 317.340 34.7746  28
  -4   5   8 13.9527 19.7324  18
  -4   5   8 7.31411 21.1822  28
  -4   5   7 81.3829 25.8388  18
  -4   5   7 60.0602 26.4974  28
  -4   5   6 1655.00 85.2334  18
  -4   5   5 47.4662 27.5011  18
  -4   5   4 197.229 36.1563  18
  -4   5   3 878.272 64.6916  18
   4  -5  -2 3291.79 125.201  22
   4   5  -2 3577.97 139.909  19
  -4   5   2 3464.74 128.407  18
  -4   5   2 3292.86 124.402  24
  -4   5   1 88.2070 33.3109  24
   4  -5  -1 172.358 34.8330  22
   4   5  -1 113.363 35.8574  27
  -4   5   0 54.0261 27.4081  24
   4   5   0 51.1820 28.6910  27
   4   5   1 1914.81 100.829  27
  -4   5  -1 1890.18 93.7540  24
   4   5   2 1615.48 95.0246  27
  -4   5  -2 1788.74 90.8148  24
  -4   5  -3 217.606 38.1023  24
   4   5   3 173.038 36.2564  27
   4   5   4 375.049 44.1982  31
   4   5   4 369.989 47.9366  27
  -4   5  -4 465.764 48.2973  24
   4   5   5 820.169 62.4835  31
   4   5   5 877.870 66.5675  27
  -4   5  -5 907.978 62.3978  24
   4   5   6 418.624 46.4460  31
  -4   5  -6 426.930 44.9405  24
  -4   5  -7 20.0351 19.4624  24
   4   5   7 10.9755 21.7294  31
  -4   5  -8 30.2141 19.4627  24
  -4   5  -9 203.346 24.9540  24
  -4   5 -10 47.8248 15.2397  20
  -4   6   9 1.15121 10.8859  28
  -4   6   8 72.8073 18.5443  28
  -4   6   7 309.927 32.5528  18
  -4   6   7 280.328 31.6726  28
  -4   6   6-2.27515 18.9910  18
  -4   6   5 232.402 33.6984  18
  -4   6   4 2.50609 18.3171  24
  -4   6   4 23.6963 20.4606  18
  -4   6   3 374.675 41.3180  18
  -4   6   3 443.822 44.6435  24
  -4   6   2 39.1210 23.5281  24
   4   6  -2 55.5562 28.0335  19
  -4   6   1 28.6979 23.1447  24
   4   6  -1 16.3412 25.1535  19
  -4   6   0 98.4462 27.5980  24
   4   6   0 108.137 30.3068  27
  -4   6  -1 152.838 30.8519  24
   4   6   1 169.217 35.8383  27
   4   6   2 366.921 46.0397  27
  -4   6  -2 333.410 40.7142  24
  -4   6  -3 253.357 36.5010  24
   4   6   3 252.372 38.6387  27
  -4   6  -4 133.113 29.8850  24
   4   6   4 98.0421 27.5915  27
   4   6   5 437.371 41.1665  31
   4   6   5 381.788 40.7453  27
  -4   6  -5 344.293 36.3976  24
   4   6   6 396.251 37.7993  31
   4   6   6 303.775 34.9913  27
  -4   6  -6 335.591 34.0907  24
  -4   6  -7 532.596 37.4622  20
  -4   6  -7 419.917 34.7104  24
  -4   6  -8 452.584 32.1709  20
  -4   7   5 204.734 22.5621  24
  -4   7   4 430.060 34.4365  24
  -4   7   3 588.015 41.7472  24
  -4   7   2 92.0022 22.6448  24
  -4   7   1 22.8694 17.7859  24
   4   7  -1 24.5417 19.2368  19
  -4   7   0-12.5656 19.0172  24
   4   7   0-14.1233 19.8123  19
  -4   7  -1 63.5976 20.0398  24
   4   7   1 59.4724 23.0896  19
   4   7   1 62.4727 21.3895  27
   4   7   2 320.827 37.7933  19
   4   7   2 344.886 36.4569  27
  -4   7  -2 336.984 33.0729  24
  -4   7  -3 65.2632 20.7799  24
   4   7   3 59.9766 22.6284  19
   4   7   3 27.6441 20.8898  27
   4   7   4 195.058 27.4654  19
   4   7   4 234.008 29.2887  27
  -4   7  -4 247.358 27.0169  24
   4   7   5 273.052 27.9804  27
  -4   7  -5 277.236 24.7898  24
   4   7   6 190.356 21.1610  27
   5   0 -12-7.08042 15.0296   6
   5   0 -11 389.935 36.5883   6
   5   0 -10-7.32609 21.2166   6
   5   0  -9 240.094 36.6951   6
   5   0  -8 2.86588 22.9035  21
   5   0  -7 1652.74 88.8577  21
   5   0  -5 1112.09 76.0944  19
   5   0  -5 1000.28 73.0049  25
   5   0  -4-18.4955 26.4418  19
   5   0  -4-3.71700 24.0333  25
   5   0  -3 856.590 68.7203  19
   5   0  -3 693.109 57.6081   5
   5   0  -3 838.806 67.8395  25
   5   0  -2 22.5307 27.8155  12
   5   0  -2 7.30163 25.1910  19
   5   0  -2-11.1131 24.2815  25
   5   0  -2 3.12149 22.0576   5
  -5   0   1 3927.84 182.383   1
   5   0  -1 4591.58 190.996  12
   5   0  -1 4167.62 152.096  19
   5   0  -1 4147.62 143.201   5
   5   0  -1 4192.16 153.415  25
   5   0  -1 4645.65 195.449  14
   5   0   0 5.83680 28.1288  14
   5   0   0-9.36248 26.2661   5
   5   0   0 3.51744 23.9728  19
  -5   0   0-5.90258 33.0511   1
   5   0   0 14.4128 24.5572  25
   5   0   1 6043.03 229.678  14
  -5   0  -1 6542.53 242.174   1
   5   0   1 5711.95 175.999   5
   5   0   1 6254.59 187.771  25
   5   0   2-11.9929 28.8982  14
   5   0   2 9.60554 23.1456   5
   5   0   3 83.2280 31.0828  23
   5   0   3 143.298 35.3067   5
   5   0   4 31.4785 25.2850  23
   5   0   4 6.63058 23.1546   5
   5   0   5 1418.23 82.5751   5
   5   0   6 13.4449 24.0271   5
   5   0   7 9414.64 239.469   5
   5   0   8 6.23506 24.9148   5
   5   0   9 36.7674 23.4165   5
   5   0  10-12.1215 20.7364   5
   5   0  11 361.952 34.3753   5
   5   0  12-6.73506 12.4871   5
   5   1 -12 758.964 39.0668   6
   5  -1 -12 903.974 42.8394   6
   5  -1 -11 108.215 21.9220  21
   5   1 -11 105.236 23.0085   6
   5  -1 -11 68.6971 20.1529   6
   5   1 -10 746.669 51.6677   6
   5  -1 -10 752.471 52.3128   6
   5  -1 -10 616.940 47.5105  21
   5   1  -9 578.725 50.7413   6
   5  -1  -9 658.065 53.1681   6
   5  -1  -9 624.777 52.6985  21
   5  -1  -8 398.030 46.0919  21
   5  -1  -7 28.6263 26.5531  21
   5  -1  -6 199.655 36.7706  21
  -5   1   5 1275.85 77.5606  18
   5   1  -4 1105.37 76.9365  19
  -5   1   4 1131.09 74.1113  18
   5   1  -4 1142.19 76.9505  25
   5  -1  -3 190.794 39.4034  19
   5   1  -3 180.646 39.8366  19
   5  -1  -3 190.071 34.6021   5
   5   1  -3 248.764 41.1042  25
   5  -1  -2 136.411 38.3748  12
   5  -1  -2 81.2026 32.5896  19
   5   1  -2 135.934 32.9182  19
   5  -1  -2 108.742 33.5965  25
   5   1  -2 96.9172 32.1679  25
   5   1  -2 76.4332 27.9934   5
   5  -1  -2 84.4863 27.0149   5
   5   1  -1 73.0332 28.0287   5
   5   1  -1 23.0035 25.5638  14
   5  -1  -1 59.2294 24.0029   5
   5  -1  -1 53.1304 34.2670  14
   5  -1  -1 112.267 38.7392  12
  -5  -1   1 45.9608 34.4789   1
   5  -1  -1 101.254 32.6129  19
   5   1  -1 32.7104 26.2849  19
   5  -1  -1 25.7370 25.0706  25
   5   1  -1 63.2319 28.6351  25
   5   1   0 131.964 39.1447  14
   5  -1   0 171.132 43.1664  14
   5   1   0 110.168 29.1793   5
   5  -1   0 147.475 30.4839   5
  -5   1   0 77.2381 35.1134   1
   5  -1   0 94.7795 35.0092  12
  -5  -1   0 157.558 44.0548   1
   5  -1   0 98.7624 29.0024  19
   5   1   0 103.917 31.8922  19
  -5  -1   0 165.915 47.8174   9
   5  -1   0 143.754 34.0303  25
   5   1   1 75.2137 32.4124  14
   5  -1   1 65.4512 31.4282  14
   5   1   1 83.6169 26.0848   5
   5  -1   1 69.9185 27.8416   5
   5   1   1 80.8623 28.3696  19
  -5  -1  -1 36.7998 30.3047   1
   5   1   2 94.2177 35.9357  14
   5  -1   2 127.260 41.3355  14
   5   1   2 106.436 29.0681   5
   5  -1   2 135.037 31.9872   5
   5   1   3 119.087 31.4115  23
   5   1   3 133.419 31.6189   5
   5  -1   3 143.725 33.4491   5
   5   1   4 135.118 39.0248  23
   5   1   4 174.132 37.1733   5
   5  -1   4 159.206 36.1709   5
   5   1   5 524.851 56.1828  23
   5   1   5 602.133 55.2131   5
   5  -1   5 462.374 49.9695   5
   5   1   6 923.484 70.5889  23
   5   1   6 1048.82 71.1849   5
   5  -1   6 1097.52 71.3870   5
   5   1   7 298.869 43.0286  23
   5   1   7 383.904 45.0441   5
   5  -1   7 415.599 46.9816   5
   5   1   8 722.310 59.6914  23
   5   1   8 786.575 58.4208   5
   5  -1   8 865.235 63.3972   5
   5   1   9 996.442 64.9261  23
   5   1   9 1011.24 62.9634   5
   5  -1   9 958.193 62.5068   5
   5   1  10 119.439 25.9609  23
   5   1  10 156.908 27.5205   5
   5  -1  10 175.492 29.3773   5
   5   1  11 36.4198 17.3361   5
   5  -1  11 20.1975 16.5596   5
   5   1  12 30.6791 11.6863   5
   5  -1  12 18.7786 12.5162   5
   5  -2 -11 1610.01 64.5871  21
   5  -2 -10 1036.66 58.2210  21
   5  -2  -9 1266.56 71.0042  21
   5  -2  -8 43.5608 27.1092  21
   5  -2  -7 165.226 35.4764  21
   5  -2  -6 843.295 64.9637  21
  -5   2   6 946.649 67.0058  18
   5  -2  -5 879.883 65.6513  21
  -5   2   5 916.777 67.8191  18
   5   2  -4 7469.46 215.672  19
  -5   2   4 7605.03 210.565  18
   5  -2  -3 1330.25 77.3708  22
   5   2  -3 1139.36 79.4176  19
  -5   2   3 1112.29 74.9567  18
   5   2  -3 1224.25 81.4158  25
   5   2  -2 187.110 41.4370  19
  -5   2   2 147.357 34.9396  18
   5  -2  -1 1921.95 92.7546  22
   5   2  -1 1909.82 102.375  19
  -5   2   1 1622.26 89.3061  18
   5  -2   0 547.950 51.1768  22
   5   2   0 530.407 56.4433  19
  -5   2   0 643.180 55.0565  18
   5  -2   1 11672.8 273.983  22
   5   2   1 12086.9 291.407  19
   5   2   2 6968.83 203.638  19
   5   2   3 4607.09 160.358  23
   5   2   4 1565.09 96.3068  23
   5   2   5 2854.89 123.108  23
   5  -2   5 2799.32 114.876   5
   5   2   6 28.9901 28.4312  23
   5  -2   6 21.8880 26.5343   5
   5   2   7 343.453 46.0573  23
   5  -2   7 338.020 41.3299   5
   5   2   8 217.828 37.4260  23
   5  -2   8 146.024 30.5301   5
   5   2   9 2156.98 95.1980  23
   5  -2   9 2113.26 87.6042   5
   5   2  10 102.461 24.7483  23
   5  -2  10 77.0910 22.0718   5
   5   2  11 312.954 30.2572  23
   5  -3 -11 19.6611 14.7494  21
   5  -3 -10 9.02567 16.2755  21
   5  -3  -9 80.1015 23.7653  21
   5  -3  -8 148.734 31.0955  21
   5  -3  -7 92.7228 29.5583  21
  -5   3   7 133.551 29.7273  18
   5  -3  -6 2352.25 103.086  21
  -5   3   6 2618.68 108.919  18
   5  -3  -5 48.7759 29.9306  21
  -5   3   5 6.53302 24.6426  18
  -5   3   4 419.453 47.8202  18
   5  -3  -3 2422.49 109.051  22
   5   3  -3 2645.74 118.449  19
  -5   3   3 2682.02 113.847  18
   5  -3  -2 629.138 54.8910  22
   5   3  -2 632.868 60.4782  19
  -5   3   2 591.228 55.9146  18
   5   3  -1 194.470 41.2508  19
  -5   3   1 225.276 39.1879  18
   5  -3   0 1826.42 92.9253  22
   5   3   0 1532.13 93.8281  19
   5  -3   1 6208.26 183.839  22
   5   3   1 6253.48 194.056  19
   5  -3   2 378.719 46.3819  22
   5   3   2 441.886 52.0805  19
   5   3   3 77.6083 37.8409  23
   5   3   4 881.519 67.3895  23
   5   3   5 1650.76 90.5538  23
   5   3   6 117.365 35.2623  23
   5   3   7 543.359 52.1625  23
   5   3   8 486.342 47.5436  23
   5   3   9 1314.49 68.6280  23
   5   3  10 49.9018 18.9700  23
   5   3  11 89.7055 16.6285  23
  -5   4  10 16.5948 12.0528  28
  -5   4   9-1.72309 15.3118  28
  -5   4   8 3.99313 15.8122  18
  -5   4   8 38.8834 20.9520  28
  -5   4   7 282.227 35.2228  18
  -5   4   6 311.162 39.6293  18
  -5   4   5 205.569 35.4433  18
  -5   4   4 1237.56 75.1971  18
   5  -4  -3 99.3926 32.6283  22
   5   4  -3 27.4480 27.1754  19
  -5   4   3 12.6880 25.5856  18
   5  -4  -2 15.7789 23.5608  22
   5   4  -2-14.3890 28.7484  19
  -5   4   2-3.15055 21.7390  18
   5  -4  -1 31.6364 27.0615  22
   5   4  -1 36.9544 27.5918  19
  -5   4   1 6.14399 23.1753  18
   5  -4   0 694.533 57.4667  22
   5   4   0 685.687 63.7918  19
   5  -4   1 382.643 43.9694  22
   5   4   1 324.949 46.8833  19
   5   4   1 392.410 49.8084  27
  -5   4  -2 2.90937 20.5589  24
   5  -4   2 9.40142 21.3584  22
   5   4   2 3.59261 25.3869  19
   5   4   2 10.8592 24.6702  27
   5  -4   3 947.449 65.1128  22
   5   4   3 966.872 70.7843  19
   5   4   3 829.716 66.3161  27
  -5   4  -3 970.904 63.9560  24
   5  -4   4 342.265 42.4866  22
   5   4   4 342.942 43.9577  27
  -5   4  -4 351.145 41.4695  24
   5  -4   5 177.177 32.3200  22
   5  -4   6 375.241 39.6236  22
   5   4   7 133.033 27.0182  23
   5  -4   7 141.833 25.6979  22
   5   4   8 29.6565 18.5485  23
   5  -4   8 21.0692 16.5163  22
  -5   4  -9 81.1801 18.1881  24
   5   4   9 72.7534 18.8936  23
  -5   4 -10 360.371 25.0709  24
  -5   5   8 417.268 30.1487  18
  -5   5   8 311.483 28.4218  28
  -5   5   7 183.027 26.2969  18
  -5   5   7 229.197 28.7379  28
  -5   5   6-4.30447 18.5543  18
  -5   5   6 16.5188 19.0113  28
  -5   5   5-2.40430 19.3885  18
  -5   5   4 236.218 35.8159  18
   5   5  -3 119.117 29.5310  19
  -5   5   3 131.862 27.1728  18
   5   5  -2 214.914 37.1148  19
  -5   5   2 202.333 32.3047  18
   5  -5  -1 19.1496 22.0627  22
   5   5  -1 22.5210 26.4055  19
   5  -5   0 519.813 47.7225  22
   5   5   0 524.366 55.0166  19
  -5   5  -1-2.63971 18.8690  24
   5  -5   1 5.34515 21.1637  22
   5   5   1 19.5089 26.9137  19
   5   5   1 16.0188 26.5186  27
  -5   5  -2 209.944 32.8446  24
   5  -5   2 186.777 30.9918  22
   5   5   2 191.590 36.2357  19
   5   5   2 138.602 33.7096  27
  -5   5  -3 107.300 26.0323  24
   5  -5   3 113.660 25.8757  22
   5   5   3 126.409 31.7285  19
   5   5   3 147.481 32.4822  27
   5  -5   4 2106.14 85.2006  22
   5   5   4 2060.41 91.5724  27
  -5   5  -4 2066.09 86.8551  24
  -5   5  -5 155.015 26.9455  24
  -5   5  -6 8.01674 15.7235  24
  -5   5  -7 757.214 43.8991  24
  -5   5  -8 330.370 27.1750  24
  -5   6   6 25.8146 13.4187  18
  -5   6   5 7.67314 14.8840  18
  -5   6   4 6.76448 15.6769  18
  -5   6   3 49.2641 17.5974  18
   5   6  -2 189.456 28.8306  19
  -5   6   1 160.650 26.8035  24
   5   6  -1 142.175 28.9423  19
  -5   6   0 81.8919 22.2760  24
   5   6   0 19.3203 21.1548  19
   5   6   1 694.190 51.6369  19
  -5   6  -1 715.679 46.8791  24
   5   6   2 208.882 31.8928  19
  -5   6  -2 296.170 31.6387  24
  -5   6  -3 50.1193 18.9853  24
   5   6   3 27.2035 19.2750  19
  -5   6  -4 84.6961 19.6144  24
  -5   6  -5 148.919 21.1317  24
  -5   6  -6 582.923 30.7827  20
  -5   6  -6 492.146 30.3063  24
   6   0 -10 67.1764 16.2048   6
   6   0  -9-7.01070 18.4091   6
   6   0  -8 6.45483 20.2133   6
   6   0  -7-27.7863 20.8806  21
   6   0  -6 4725.12 142.762  21
  -6   0   4 1775.92 89.4421  18
   6   0  -3 3.66386 28.7435  19
   6   0  -2 1475.65 90.1776  19
   6   0  -2 1339.79 88.6538  25
   6   0  -1-3.72054 29.7340  19
   6   0  -1 11.3723 27.7059  25
   6   0  -1 19.2514 27.8763   5
   6   0   0 13058.5 312.872  19
   6   0   0 13802.5 309.057   5
   6   0   0 13447.2 317.665  25
   6   0   1 3.23841 26.5772   5
   6   0   1-7.24853 24.0754  25
   6   0   2 17051.8 359.520   5
   6   0   3 19.0806 24.2335   5
   6   0   4 557.785 55.1727   5
   6   0   5-14.7731 23.8274   5
   6   0   6 49.4109 29.5898   5
   6   0   7 14.7884 21.4146   5
   6   0   8 1092.74 58.0851   5
   6   0   9-6.78624 14.2793   5
   6   0  10 19.3489 11.8757   5
   6  -1 -10 15.4969 11.4472  21
   6   1 -10 26.6584 11.9754   6
   6  -1 -10 37.6359 13.6553   6
   6   1  -9 424.543 32.7612   6
   6  -1  -9 408.414 33.6398   6
   6  -1  -9 442.686 33.1165  21
   6  -1  -8 128.115 24.9369  21
   6   1  -8 91.3475 23.9744   6
   6  -1  -8 96.4485 24.7714   6
   6  -1  -7 308.154 37.3100  21
   6  -1  -6 1885.42 87.1012  21
   6  -1  -5 758.566 58.0632  21
   6   1  -5 812.084 62.5197  19
  -6   1   5 812.952 58.9514  18
   6   1  -4 1042.48 73.0950  19
  -6   1   4 1124.68 71.0284  18
   6   1  -4 978.794 70.8308  25
   6   1  -3 802.563 67.0475  19
  -6   1   3 752.089 60.0026  18
   6   1  -3 823.003 68.0244  25
   6   1  -2 202.882 41.5812  19
  -6   1   2 154.119 34.1750  18
   6   1  -2 182.590 37.9707  25
   6   1  -1 902.664 70.7959  19
   6   1  -1 913.903 65.3102   5
   6  -1  -1 986.165 68.7639   5
  -6   1   1 863.797 64.5304  18
   6   1  -1 931.367 71.0733  25
   6   1   0 3662.40 140.975  19
   6   1   0 3347.34 126.169   5
   6  -1   0 3633.34 134.705   5
   6   1   0 3487.63 140.102  25
   6   1   1 705.880 61.7788  19
   6   1   1 825.839 63.4936   5
   6  -1   1 801.564 61.3059   5
   6   1   1 758.653 64.6797  25
   6   1   2 125.587 30.8560   5
   6  -1   2 162.087 33.2680   5
   6   1   2 133.403 34.3181  25
   6   1   3 717.132 56.7570   5
   6  -1   3 723.027 59.0760   5
   6   1   4 701.554 56.0496   5
   6  -1   4 699.527 58.4271   5
   6   1   5 69.5180 28.1463   5
   6  -1   5 132.827 31.3043   5
   6   1   6 194.842 32.9403   5
   6  -1   6 213.761 35.0379   5
   6   1   7 1091.67 60.3033   5
   6  -1   7 1188.00 64.2618   5
   6   1   8 55.7423 18.5500   5
   6  -1   8 75.1261 21.9001   5
   6   1   9 136.280 20.1165   5
   6  -1   9 122.340 20.5393   5
   6  -1  10 113.445 16.1654   5
   6  -2  -9 111.327 19.9085  21
   6  -2  -8 56.1493 20.5849  21
   6  -2  -7 437.691 40.9309  21
   6  -2  -6-7.46196 22.1033  21
  -6   2   6-12.1425 18.5055  18
   6  -2  -5 88.9323 31.4589  21
  -6   2   5 142.009 29.9161  18
   6  -2  -4 230.173 36.2033  21
   6   2  -4 140.599 32.7785  19
  -6   2   4 211.929 34.8511  18
   6   2  -4 165.982 33.5176  25
   6   2  -3 235.386 39.2386  19
  -6   2   3 264.179 38.4827  18
   6   2  -3 227.085 38.2964  25
   6   2  -2 371.376 47.8855  19
  -6   2   2 343.978 42.6727  18
   6   2  -2 348.410 47.3617  25
   6   2  -1 390.138 48.7987  19
  -6   2   1 373.316 44.5682  18
   6   2  -1 374.664 48.9593  25
   6   2   0 2131.57 104.830  19
  -6   2   0 2049.22 94.8959  18
   6  -2   0 1973.64 94.1366   5
   6   2   0 2092.20 104.955  25
   6  -2   1-11.6679 22.2269   5
   6  -2   1-2.84334 20.5540  22
   6   2   1-3.45250 23.8225  19
   6   2   1 17.9533 25.3730  25
   6  -2   2 151.015 31.8175   5
   6  -2   2 116.517 27.1128  22
   6   2   2 124.368 33.1427  25
   6  -2   3 17.0385 22.4876   5
   6  -2   3-19.6293 20.2711  22
   6  -2   4-2.71974 20.7241   5
   6  -2   4-5.43857 19.8746  22
   6  -2   5 1230.00 67.3900  22
   6  -2   5 1242.69 67.5599   5
   6  -2   6 1451.04 70.5216  22
   6  -2   6 1419.97 69.4933   5
   6  -2   7 899.583 51.7486   5
   6  -2   8-4.97068 13.2415   5
   6  -2   8 1.73418 13.4759  22
   6  -2   9 10.5944 10.9627  22
   6  -3  -8 266.934 25.4695  21
   6  -3  -7 113.586 22.3645  21
  -6   3   7 111.536 21.3935  18
   6  -3  -6 18.3605 16.7438  21
  -6   3   6 10.6431 16.8574  18
   6  -3  -5 233.600 31.5824  21
  -6   3   5 264.607 33.7985  18
   6   3  -4 25.0155 23.9650  19
  -6   3   4 29.0802 23.3220  18
   6   3  -3 219.342 37.0139  19
  -6   3   3 260.091 38.5735  18
   6   3  -3 235.412 37.6097  25
   6  -3  -2 10.5982 21.9312  22
   6   3  -2 9.64150 25.9167  19
  -6   3   2-11.2408 20.9807  18
   6   3  -2 6.39110 21.7790  25
   6  -3  -1 260.501 36.2275  22
   6   3  -1 326.098 44.2897  19
  -6   3   1 344.383 39.8593  18
   6   3  -1 349.184 43.9867  25
   6  -3   0 46.6140 23.6545  22
   6   3   0 46.0379 27.9162  19
   6   3   0 97.8209 30.8556  25
   6  -3   1 54.9511 24.6048  22
   6   3   1 38.4548 27.6356  19
   6   3   1 53.3506 27.6094  25
   6  -3   2 162.482 29.7161  22
   6   3   2 133.508 30.9425  19
   6   3   2 218.375 37.0293  25
   6  -3   3 670.805 52.2417  22
   6   3   3 590.592 52.9050  25
   6  -3   4 1664.76 78.0778  22
   6  -3   5 20.8010 17.9625  22
   6  -3   6 263.758 30.4485  22
   6  -3   7 1.75118 13.6080  22
  -6   3  -8 11.2782 11.0546  24
   6  -3   8 11.0539 11.4382  22
  -6   4   7 12.5837 11.5091  18
  -6   4   7 25.0102 14.1872  28
  -6   4   6 139.294 21.7242  18
  -6   4   5 249.635 29.0529  18
  -6   4   4 912.409 54.6694  18
   6   4  -3 85.6895 25.7522  19
  -6   4   3 102.648 23.9662  18
   6   4  -2 143.451 31.2077  19
  -6   4   2 205.918 30.9563  18
   6   4  -2 189.013 31.6766  25
   6  -4  -1 97.2071 24.6779  22
   6   4  -1 105.175 30.7389  19
   6   4  -1 85.5131 25.7808  25
   6  -4   0 351.690 38.9521  22
   6   4   0 354.468 41.9361  19
   6   4   0 258.059 37.8401  25
   6  -4   1 56.5847 23.2946  22
   6   4   1 29.9591 24.7386  19
   6  -4   2 13.7521 18.6476  22
   6   4   2-2.56305 20.1077  19
   6  -4   3-4.34764 17.0540  22
   6  -4   4 845.159 50.7189  22
   6   4   4 817.175 52.1274  25
   6  -4   5 51.7657 17.8545  22
   6  -4   6 271.594 25.7613  22
  -6   4  -6 230.178 23.6643  24
   6  -4   7 823.769 38.0010  22
  -6   4  -7 826.977 37.5996  24
  -6   5   5 4.77690 10.2955  18
  -6   5   4 137.907 19.8742  18
  -6   5   3 19.1582 13.9382  18
   6   5  -2 51.8990 19.1734  19
   6   5  -1 1.99442 18.1096  19
   6   5  -1 1.92178 15.7717  25
   6   5   0 262.717 31.4340  19
   6   5   0 269.469 31.0452  25
   6  -5   1 287.378 28.5628  22
   6   5   1 291.993 31.7858  19
   6   5   1 242.182 30.3365  25
   6  -5   2 452.397 33.6210  22
   6   5   2 467.104 37.1947  19
   6   5   2 443.681 37.5747  25
   6  -5   3 84.4086 16.8561  22
   6   5   3 68.5971 19.2698  25
   6  -5   4 84.1107 16.7336  22
   6   5   4 103.736 19.2664  25
   7   0  -7 134.466 17.3646   6
   7   0  -6 1.30025 11.2966  21
   7   0  -5 195.837 23.7650  21
   7   0  -4-1.84707 16.0473  21
  -7   0   4 1.86979 16.1193  18
  -7   0   3 18.8608 17.4948  18
  -7   0   2-20.1734 18.5558  18
  -7   0   1 547.036 44.1014  18
  -7   0   0-11.4555 19.4410  18
  -7   0  -1 329.268 35.0981  18
  -7   0  -2-8.05989 16.6789  18
   7   0   2-8.53544 17.0538   5
   7   0   3 245.873 29.2785   5
   7   0   4 1.84583 15.5353   5
   7   0   5 45.4726 16.7992   5
   7   0   6-4.04428 11.8912   5
   7  -1  -6 44.4064 15.2928  21
   7   1  -6 48.3410 14.4640   6
   7  -1  -5 98.9430 21.3020  21
  -7   1   5 78.2085 17.8835  18
   7  -1  -4 1419.33 62.9251  21
  -7   1   4 1390.15 61.9885  18
   7  -1  -3 70.0718 21.3803  21
  -7   1   3 108.278 22.9004  18
  -7  -1   3 39.5193 18.3437  18
  -7   1   2 701.528 47.6865  18
  -7  -1   2 622.913 45.6794  18
  -7   1   1 843.109 52.4926  18
  -7   1   0 1442.56 68.1423  18
  -7   1  -1 183.963 26.6388  18
   7   1   2 1433.65 64.8824   5
   7  -1   2 1594.45 70.2367   5
   7   1   3-3.64796 15.8469   5
   7  -1   3 15.4853 16.5565   5
   7   1   4 753.693 43.1960   5
   7  -1   4 769.745 45.1950   5
   7   1   5 27.0825 14.4129   5
   7  -1   5 18.5116 13.5091   5
   7   1   6 47.7052 12.1409   5
   7  -1   6 58.1527 14.1124   5
   7  -2  -6 678.550 34.4022  21
   7  -2  -5 165.220 21.2917  21
  -7   2   5 121.518 19.2257  18
   7  -2  -4 126.026 20.7773  21
  -7   2   4 83.6325 19.6571  18
   7  -2  -3 226.524 27.1814  21
  -7   2   3 145.069 23.7589  18
   7  -2  -2 50.5109 21.3901  21
   7   2  -2 19.6087 18.3447  19
  -7   2   2 41.8472 19.6677  18
   7   2  -1 1458.18 69.7947  19
  -7   2   1 1397.64 63.9662  18
   7   2  -1 1395.47 69.6104  25
   7   2   0 2147.78 85.1856  19
  -7   2   0 2127.55 77.6525  18
   7   2   0 2197.87 86.7209  25
   7   2   1 1994.67 79.6660  19
   7   2   1 2034.04 82.0983  25
   7   2   2 1225.73 60.3060  25
  -7   3   4-11.1608 12.8882  18
   7   3  -3 18.4569 13.1577  19
  -7   3   3 13.8840 12.7854  18
   7   3  -2-10.3597 15.2298  19
  -7   3   2 1.45025 11.9020  18
   7   3  -2 3.37245 14.0752  25
   7   3  -1 190.582 26.2378  19
  -7   3   1 174.147 21.8703  18
   7   3  -1 200.015 25.6933  25
   7   3   0 9.01855 15.6714  19
   7   3   0 12.9812 15.4802  25
   7  -3   1 26.2843 12.8439  22
   7   3   1 79.5244 20.1521  19
   7   3   1 73.5548 19.4422  25
   7  -3   2 99.7288 16.9603  22
   7   3   2 106.147 19.5745  25
   7  -3   3 6.11360 10.0351  22
   0   0   0    0.00    0.00   0

TITL UrAc_243K in P2(1)/n
REM P2(1)/n (#14 in standard setting)
CELL 1.54184   6.210952   7.385688  13.121263  90.0000  90.4470  90.0000
ZERR    4.00   0.000359   0.000508   0.000818   0.0000   0.0058   0.0000
LATT  1
SYMM -x+1/2, y+1/2,-z+1/2
SFAC C H N O
UNIT 20.00 16.00 16.00 12.00
TREF
HKLF 4
END
;
_shelx_hkl_checksum                10537
_olex2_submission_special_instructions  'No special instructions were received'
_oxdiff_exptl_absorpt_empirical_details
;
Empirical correction (ABSPACK) includes:
- Absorption correction using spherical harmonics
- Frame scaling
;
_oxdiff_exptl_absorpt_empirical_full_max  1.176
_oxdiff_exptl_absorpt_empirical_full_min  0.875
loop_
  _twin_individual_id
  _twin_individual_mass_fraction_refined
 1 0.9328(19)
 2 0.0672(19)
