# Supplementary material
Source: MDPI journal article supplement (https://www.mdpi.com/2075-163X/9/6/373)
Supplement: s1 [file s1 › UA_-60_last.cif]

data_UA_-60_urac_213k
_audit_creation_date               2019-04-29
_audit_creation_method
;
Olex2 1.2
(compiled 2018.05.29 svn.r3508 for OlexSys, GUI svn.r5506)
;
_shelx_SHELXL_version_number       '2018/3'
_audit_contact_author_address      ?
_audit_contact_author_email        ?
_audit_contact_author_name         ''
_audit_contact_author_phone        ?
_publ_contact_author_id_orcid      ?
_publ_section_references
;
Dolomanov, O.V., Bourhis, L.J., Gildea, R.J, Howard, J.A.K. & Puschmann, H.
 (2009), J. Appl. Cryst. 42, 339-341.

Sheldrick, G.M. (2015). Acta Cryst. C71, 3-8.
;
_chemical_name_common              ?
_chemical_name_systematic          ?
_chemical_formula_moiety           'C5 H4 N4 O3'
_chemical_formula_sum              'C5 H4 N4 O3'
_chemical_formula_weight           168.12
_chemical_melting_point            ?
_chemical_oxdiff_formula           'C5 H4 N4 O3'
loop_
  _atom_type_symbol
  _atom_type_description
  _atom_type_scat_dispersion_real
  _atom_type_scat_dispersion_imag
  _atom_type_scat_source
 'C' 'C' 0.0181 0.0091 'International Tables Vol C Tables 4.2.6.8 and 6.1.1.4'
 'H' 'H' 0.0000 0.0000 'International Tables Vol C Tables 4.2.6.8 and 6.1.1.4'
 'N' 'N' 0.0311 0.0180 'International Tables Vol C Tables 4.2.6.8 and 6.1.1.4'
 'O' 'O' 0.0492 0.0322 'International Tables Vol C Tables 4.2.6.8 and 6.1.1.4'

_shelx_space_group_comment
;
The symmetry employed for this shelxl refinement is uniquely defined
by the following loop, which should always be used as a source of
symmetry information in preference to the above space-group names.
They are only intended as comments.
;
_space_group_crystal_system        'monoclinic'
_space_group_IT_number             14
_space_group_name_H-M_alt          'P 1 21/n 1'
_space_group_name_Hall             '-P 2yn'
loop_
  _space_group_symop_operation_xyz
 'x, y, z'
 '-x+1/2, y+1/2, -z+1/2'
 '-x, -y, -z'
 'x-1/2, -y-1/2, z-1/2'

_cell_length_a                     6.2182(4)
_cell_length_b                     7.3530(5)
_cell_length_c                     13.1232(8)
_cell_angle_alpha                  90
_cell_angle_beta                   90.519(6)
_cell_angle_gamma                  90
_cell_volume                       600.00(7)
_cell_formula_units_Z              4
_cell_measurement_reflns_used      1225
_cell_measurement_temperature      213(2)
_cell_measurement_theta_max        70.6730
_cell_measurement_theta_min        6.7330
_shelx_estimated_absorpt_T_max     ?
_shelx_estimated_absorpt_T_min     ?
_exptl_absorpt_coefficient_mu      1.371
_exptl_absorpt_correction_T_max    1.00000
_exptl_absorpt_correction_T_min    0.95366
_exptl_absorpt_correction_type     multi-scan
_exptl_absorpt_process_details
;
CrysAlisPro 1.171.39.44a (Rigaku Oxford Diffraction, 2018)
Empirical absorption correction using spherical harmonics,
 implemented in SCALE3 ABSPACK scaling algorithm.
;
_exptl_absorpt_special_details     ?
_exptl_crystal_colour              'translucent light-yellow'
_exptl_crystal_density_diffrn      1.861
_exptl_crystal_density_meas        ?
_exptl_crystal_density_method      ?
_exptl_crystal_description         'prism'
_exptl_crystal_F_000               344
_exptl_crystal_size_max            0.075
_exptl_crystal_size_mid            0.07
_exptl_crystal_size_min            0.027
_exptl_transmission_factor_max     ?
_exptl_transmission_factor_min     ?
_diffrn_reflns_av_R_equivalents    0.0213
_diffrn_reflns_av_unetI/netI       0.0329
_diffrn_reflns_Laue_measured_fraction_full  0.986
_diffrn_reflns_Laue_measured_fraction_max  0.986
_diffrn_reflns_limit_h_max         7
_diffrn_reflns_limit_h_min         -7
_diffrn_reflns_limit_k_max         8
_diffrn_reflns_limit_k_min         -6
_diffrn_reflns_limit_l_max         15
_diffrn_reflns_limit_l_min         -15
_diffrn_reflns_number              2568
_diffrn_reflns_point_group_measured_fraction_full  0.986
_diffrn_reflns_point_group_measured_fraction_max  0.986
_diffrn_reflns_theta_full          67.684
_diffrn_reflns_theta_max           69.999
_diffrn_reflns_theta_min           3.368
_diffrn_ambient_environment        N~2~
_diffrn_ambient_temperature        213(2)
_diffrn_detector                   'CCD plate'
_diffrn_detector_area_resol_mean   ?
_diffrn_detector_type              HyPix3000
_diffrn_measured_fraction_theta_full  0.986
_diffrn_measured_fraction_theta_max  0.986
_diffrn_measurement_details
;
List of Runs (angles in degrees, time in seconds):

  # Type    Start    End  Width  t~exp~   \w     \q     \k     \f   Frames
--------------------------------------------------------------------------
  1  \w   -100.00 -73.00   0.50    1.00    --  -38.95 -55.00 -24.00   54
  2  \w    -54.00 -16.00   0.50    1.00    --  -38.95  55.00 119.00   76
  3  \w    -65.00 -30.00   0.50    1.00    --  -38.95 -55.00 -24.00   70
  4  \w     24.00  54.00   0.50    1.00    --   38.95  55.00 119.00   60
  5  \w     89.00 153.00   0.50    2.50    --  107.00  55.00 119.00  128
  6  \w     45.00 127.00   0.50    2.50    --  107.00 -55.00 -24.00  164
  7  \w    -62.00   4.00   0.50    1.00    --  -38.95  77.00-150.00  132
  8  \w    -52.00 -14.00   0.50    1.00    --  -38.95  43.00 150.00   76
  9  \w   -102.00 -42.00   0.50    1.00    --  -38.95 -65.00 -60.00  120
 10  \w    -10.00  21.00   0.50    1.00    --  -38.95  43.00 150.00   62
 11  \w     68.00 106.00   0.50    1.00    --   38.95  21.00  90.00   76
 12  \w    -18.00  11.00   0.50    1.00    --   38.95 -32.00 -30.00   58
 13  \w     29.00  63.00   0.50    1.00    --   38.95  21.00  90.00   68
 14  \w    -26.00   0.00   0.50    1.00    --   38.95 -55.00 -24.00   52
 15  \w     16.00  48.00   0.50    1.00    --   38.95 -32.00 -30.00   64
 16  \w    -21.00  21.00   0.50    1.00    --   38.95 -32.00 150.00   84
 17  \w     34.00  63.00   0.50    1.00    --   38.95  43.00 -90.00   58
 18  \w     89.00 155.00   0.50    2.50    --  107.00  45.00   0.00  132
 19  \w     78.00 129.00   0.50    2.50    --  107.00 -61.00-150.00  102
 20  \w     68.00 114.00   0.50    2.50    --  107.00-133.00-150.00   92
 21  \w     41.00 120.00   0.50    2.50    --  107.00 -30.00 -60.00  158
 22  \w     93.00 127.00   0.50    2.50    --  107.00  30.00-180.00   68
 23  \w     99.00 153.00   0.50    2.50    --  107.00  45.00  90.00  108
 24  \w     55.00 122.00   0.50    2.50    --  107.00 -37.00  90.00  134
 25  \w     97.00 122.00   0.50    2.50    --  107.00 -53.00-150.00   50
 26  \w     99.00 125.00   0.50    2.50    --  107.00-133.00 -60.00   52
 27  \w     59.00  84.00   0.50    2.50    --  107.00 -53.00-150.00   50
 28  \w    120.00 155.00   0.50    2.50    --  107.00  30.00  30.00   70
 29  \w     44.00  92.00   0.50    2.50    --  107.00-133.00 -60.00   96
 30  \w    107.00 142.00   0.50    2.50    --  107.00  15.00  90.00   70
 31  \w     72.00 115.00   0.50    2.50    --  107.00 -37.00 150.00   86
;
_diffrn_measurement_device         'four-circle diffractometer'
_diffrn_measurement_device_type   
 'SuperNova, Single source at offset/far, HyPix3000'
_diffrn_measurement_method         '\w scans'
_diffrn_orient_matrix_type        
 'CrysAlisPro convention (1999,Acta A55,543-557)'
_diffrn_orient_matrix_UB_11        0.2143029000
_diffrn_orient_matrix_UB_12        -0.0995576000
_diffrn_orient_matrix_UB_13        -0.0180696000
_diffrn_orient_matrix_UB_21        -0.0996390000
_diffrn_orient_matrix_UB_22        -0.0970225000
_diffrn_orient_matrix_UB_23        -0.0931265000
_diffrn_orient_matrix_UB_31        0.0742929000
_diffrn_orient_matrix_UB_32        0.1567551000
_diffrn_orient_matrix_UB_33        -0.0691805000
_diffrn_radiation_monochromator    mirror
_diffrn_radiation_probe            x-ray
_diffrn_radiation_type             CuK\a
_diffrn_radiation_wavelength       1.54184
_diffrn_source                     'micro-focus sealed X-ray tube'
_diffrn_source_type                'SuperNova (Cu) X-ray Source'
_reflns_Friedel_coverage           0.000
_reflns_Friedel_fraction_full      .
_reflns_Friedel_fraction_max       .
_reflns_number_gt                  990
_reflns_number_total               1118
_reflns_odcompleteness_completeness  98.22
_reflns_odcompleteness_iscentric   1
_reflns_odcompleteness_theta       72.42
_reflns_special_details
;
 Reflections were merged by SHELXL according to the crystal
 class for the calculation of statistics and refinement.
 
 _reflns_Friedel_fraction is defined as the number of unique
 Friedel pairs measured divided by the number that would be
 possible theoretically, ignoring centric projections and
 systematic absences. Completness statistics refer to single and
 composite reflections containing twin component 1 only.
;
_reflns_threshold_expression       'I > 2\s(I)'
_computing_cell_refinement         'CrysAlisPro 1.171.39.44a (Rigaku OD, 2018)'
_computing_data_collection         'CrysAlisPro 1.171.39.44a (Rigaku OD, 2018)'
_computing_data_reduction          'CrysAlisPro 1.171.39.44a (Rigaku OD, 2018)'
_computing_molecular_graphics      'Olex2 (Dolomanov et al., 2009)'
_computing_publication_material    'Olex2 (Dolomanov et al., 2009)'
_computing_structure_refinement    'ShelXL (Sheldrick, 2015)'
_computing_structure_solution      'ShelXT (Sheldrick, 2015)'
_refine_diff_density_max           0.326
_refine_diff_density_min           -0.226
_refine_diff_density_rms           0.063
_refine_ls_extinction_coef         0.0023(3)
_refine_ls_extinction_expression  
 'Fc^*^=kFc[1+0.001xFc^2^\l^3^/sin(2\q)]^-1/4^'
_refine_ls_extinction_method       'SHELXL-2018/3 (Sheldrick 2018)'
_refine_ls_goodness_of_fit_ref     1.068
_refine_ls_hydrogen_treatment      constr
_refine_ls_matrix_type             full
_refine_ls_number_parameters       111
_refine_ls_number_reflns           1118
_refine_ls_number_restraints       0
_refine_ls_R_factor_all            0.0596
_refine_ls_R_factor_gt             0.0526
_refine_ls_restrained_S_all        1.068
_refine_ls_shift/su_max            0.000
_refine_ls_shift/su_mean           0.000
_refine_ls_structure_factor_coef   Fsqd
_refine_ls_weighting_details      
 'w=1/[\s^2^(Fo^2^)+(0.0954P)^2^+0.5143P] where P=(Fo^2^+2Fc^2^)/3'
_refine_ls_weighting_scheme        calc
_refine_ls_wR_factor_gt            0.1539
_refine_ls_wR_factor_ref           0.1660
_refine_special_details
;
 Refined as a 2-component twin.
;
_olex2_refinement_description
;
1. Twinned data refinement
 Scales: 0.941(2)
 0.059(2)
2. Fixed Uiso
 At 1.2 times of:
  All N(H) groups
3.a Aromatic/amide H refined with riding coordinates:
 N1(H1), N2(H2), N3(H3), N4(H4)
;
_atom_sites_solution_hydrogens     geom
_atom_sites_solution_primary       ?
_atom_sites_solution_secondary     ?
loop_
  _atom_site_label
  _atom_site_type_symbol
  _atom_site_fract_x
  _atom_site_fract_y
  _atom_site_fract_z
  _atom_site_U_iso_or_equiv
  _atom_site_adp_type
  _atom_site_occupancy
  _atom_site_site_symmetry_order
  _atom_site_calc_flag
  _atom_site_refinement_flags_posn
  _atom_site_refinement_flags_adp
  _atom_site_refinement_flags_occupancy
  _atom_site_disorder_assembly
  _atom_site_disorder_group
 O1 O 0.9249(4) 0.4838(3) 0.36791(17) 0.0413(6) Uani 1 1 d . . . . .
 O2 O 0.5826(4) 0.7693(3) 0.63000(16) 0.0383(6) Uani 1 1 d . . . . .
 O3 O -0.0301(3) 0.9667(3) 0.35952(16) 0.0362(6) Uani 1 1 d . . . . .
 N1 N 0.7538(4) 0.6357(3) 0.49474(19) 0.0328(6) Uani 1 1 d . . . . .
 H1 H 0.858449 0.607399 0.534994 0.039 Uiso 1 1 calc R . . . .
 N2 N 0.6142(4) 0.6334(4) 0.32898(19) 0.0334(6) Uani 1 1 d . . . . .
 H2 H 0.619609 0.604534 0.265557 0.040 Uiso 1 1 calc R . . . .
 N3 N 0.2350(4) 0.8761(3) 0.47467(19) 0.0313(6) Uani 1 1 d . . . . .
 H3 H 0.183144 0.918274 0.530430 0.038 Uiso 1 1 calc R . . . .
 N4 N 0.2739(4) 0.7989(3) 0.31370(19) 0.0308(6) Uani 1 1 d . . . . .
 H4 H 0.249224 0.785669 0.249542 0.037 Uiso 1 1 calc R . . . .
 C1 C 0.7733(5) 0.5785(4) 0.3957(2) 0.0338(7) Uani 1 1 d . . . . .
 C2 C 0.4483(5) 0.7344(4) 0.3652(2) 0.0302(7) Uani 1 1 d . . . . .
 C3 C 0.4275(5) 0.7830(4) 0.4649(2) 0.0307(7) Uani 1 1 d . . . . .
 C4 C 0.5863(5) 0.7341(4) 0.5387(2) 0.0315(7) Uani 1 1 d . . . . .
 C5 C 0.1427(5) 0.8892(4) 0.3812(2) 0.0310(7) Uani 1 1 d . . . . .

loop_
  _atom_site_aniso_label
  _atom_site_aniso_U_11
  _atom_site_aniso_U_22
  _atom_site_aniso_U_33
  _atom_site_aniso_U_23
  _atom_site_aniso_U_13
  _atom_site_aniso_U_12
 O1 0.0386(12) 0.0509(14) 0.0343(13) -0.0009(10) -0.0056(10) 0.0096(10)
 O2 0.0446(13) 0.0462(13) 0.0239(12) 0.0015(9) -0.0072(9) 0.0004(10)
 O3 0.0339(11) 0.0461(13) 0.0286(11) -0.0005(9) -0.0054(9) 0.0057(9)
 N1 0.0315(13) 0.0372(14) 0.0295(13) 0.0030(10) -0.0078(11) 0.0020(11)
 N2 0.0337(13) 0.0398(14) 0.0266(13) -0.0015(10) -0.0065(10) 0.0013(11)
 N3 0.0325(12) 0.0368(14) 0.0247(12) -0.0010(10) -0.0017(10) 0.0021(11)
 N4 0.0329(13) 0.0369(14) 0.0225(12) -0.0013(10) -0.0048(10) 0.0016(10)
 C1 0.0333(15) 0.0337(15) 0.0344(16) 0.0035(12) -0.0069(13) -0.0023(12)
 C2 0.0323(14) 0.0306(14) 0.0276(15) -0.0001(11) -0.0059(12) -0.0029(12)
 C3 0.0315(15) 0.0345(15) 0.0261(14) 0.0007(11) -0.0042(12) -0.0003(12)
 C4 0.0347(15) 0.0307(15) 0.0291(15) 0.0026(11) -0.0049(12) -0.0040(12)
 C5 0.0340(15) 0.0336(16) 0.0254(14) -0.0002(11) -0.0023(11) -0.0036(12)

_geom_special_details
;
 All esds (except the esd in the dihedral angle between two l.s. planes)
 are estimated using the full covariance matrix.  The cell esds are taken
 into account individually in the estimation of esds in distances, angles
 and torsion angles; correlations between esds in cell parameters are only
 used when they are defined by crystal symmetry.  An approximate (isotropic)
 treatment of cell esds is used for estimating esds involving l.s. planes.
;
loop_
  _geom_bond_atom_site_label_1
  _geom_bond_atom_site_label_2
  _geom_bond_distance
  _geom_bond_site_symmetry_2
  _geom_bond_publ_flag
 O1 C1 1.230(4) . ?
 O2 C4 1.226(4) . ?
 O3 C5 1.247(4) . ?
 N1 H1 0.8600 . ?
 N1 C1 1.372(4) . ?
 N1 C4 1.397(4) . ?
 N2 H2 0.8600 . ?
 N2 C1 1.376(4) . ?
 N2 C2 1.361(4) . ?
 N3 H3 0.8600 . ?
 N3 C3 1.386(4) . ?
 N3 C5 1.353(4) . ?
 N4 H4 0.8600 . ?
 N4 C2 1.358(4) . ?
 N4 C5 1.379(4) . ?
 C2 C3 1.363(4) . ?
 C3 C4 1.423(4) . ?

loop_
  _geom_angle_atom_site_label_1
  _geom_angle_atom_site_label_2
  _geom_angle_atom_site_label_3
  _geom_angle
  _geom_angle_site_symmetry_1
  _geom_angle_site_symmetry_3
  _geom_angle_publ_flag
 C1 N1 H1 115.8 . . ?
 C1 N1 C4 128.5(3) . . ?
 C4 N1 H1 115.8 . . ?
 C1 N2 H2 120.6 . . ?
 C2 N2 H2 120.6 . . ?
 C2 N2 C1 118.7(3) . . ?
 C3 N3 H3 126.0 . . ?
 C5 N3 H3 126.0 . . ?
 C5 N3 C3 108.1(3) . . ?
 C2 N4 H4 125.6 . . ?
 C2 N4 C5 108.8(2) . . ?
 C5 N4 H4 125.6 . . ?
 O1 C1 N1 121.9(3) . . ?
 O1 C1 N2 121.7(3) . . ?
 N1 C1 N2 116.3(3) . . ?
 N2 C2 C3 123.8(3) . . ?
 N4 C2 N2 128.4(3) . . ?
 N4 C2 C3 107.7(3) . . ?
 N3 C3 C4 131.0(3) . . ?
 C2 C3 N3 107.9(3) . . ?
 C2 C3 C4 121.1(3) . . ?
 O2 C4 N1 122.2(3) . . ?
 O2 C4 C3 126.3(3) . . ?
 N1 C4 C3 111.4(3) . . ?
 O3 C5 N3 126.6(3) . . ?
 O3 C5 N4 125.9(3) . . ?
 N3 C5 N4 107.4(3) . . ?

loop_
  _geom_hbond_atom_site_label_D
  _geom_hbond_atom_site_label_H
  _geom_hbond_atom_site_label_A
  _geom_hbond_distance_DH
  _geom_hbond_distance_HA
  _geom_hbond_distance_DA
  _geom_hbond_angle_DHA
  _geom_hbond_site_symmetry_A
  _geom_hbond_publ_flag
 N1 H1 O1 0.86 1.96 2.819(3) 172.7 3_766 yes
 N2 H2 O3 0.86 2.00 2.806(3) 154.8 2_545 yes
 N3 H3 O3 0.86 1.93 2.783(3) 170.0 3_576 yes
 N4 H4 O2 0.86 1.92 2.725(3) 156.4 4_575 yes


loop_
  _geom_torsion_atom_site_label_1
  _geom_torsion_atom_site_label_2
  _geom_torsion_atom_site_label_3
  _geom_torsion_atom_site_label_4
  _geom_torsion
  _geom_torsion_site_symmetry_1
  _geom_torsion_site_symmetry_2
  _geom_torsion_site_symmetry_3
  _geom_torsion_site_symmetry_4
  _geom_torsion_publ_flag
 N2 C2 C3 N3 -176.8(3) . . . . ?
 N2 C2 C3 C4 1.9(5) . . . . ?
 N3 C3 C4 O2 -0.8(6) . . . . ?
 N3 C3 C4 N1 178.5(3) . . . . ?
 N4 C2 C3 N3 1.1(3) . . . . ?
 N4 C2 C3 C4 179.8(3) . . . . ?
 C1 N1 C4 O2 176.1(3) . . . . ?
 C1 N1 C4 C3 -3.3(4) . . . . ?
 C1 N2 C2 N4 -178.4(3) . . . . ?
 C1 N2 C2 C3 -1.0(5) . . . . ?
 C2 N2 C1 O1 178.5(3) . . . . ?
 C2 N2 C1 N1 -1.8(4) . . . . ?
 C2 N4 C5 O3 179.3(3) . . . . ?
 C2 N4 C5 N3 -1.4(3) . . . . ?
 C2 C3 C4 O2 -179.3(3) . . . . ?
 C2 C3 C4 N1 0.1(4) . . . . ?
 C3 N3 C5 O3 -178.6(3) . . . . ?
 C3 N3 C5 N4 2.0(3) . . . . ?
 C4 N1 C1 O1 -176.0(3) . . . . ?
 C4 N1 C1 N2 4.3(5) . . . . ?
 C5 N3 C3 C2 -1.9(3) . . . . ?
 C5 N3 C3 C4 179.5(3) . . . . ?
 C5 N4 C2 N2 178.0(3) . . . . ?
 C5 N4 C2 C3 0.2(3) . . . . ?

_shelx_res_file
;
TITL urac_213k_a.res in P2(1)/n
    urac_213k.res
    created by SHELXL-2018/3 at 22:44:13 on 29-Apr-2019
REM Old TITL UrAc_213K in P2(1)/n
REM SHELXT solution in P2(1)/n: R1 0.162, Rweak 0.041, Alpha 0.080
REM <I/s> 0.470 for 101 systematic absences, Orientation as input
REM Formula found by SHELXT: C9 O3
CELL 1.54184 6.2182 7.353 13.1232 90 90.519 90
ZERR 4 0.0004 0.0005 0.0008 0 0.006 0
LATT 1
SYMM 0.5-X,0.5+Y,0.5-Z
SFAC C H N O
UNIT 20 16 16 12

L.S. 20
PLAN  20
BOND $H
Htab
conf
list 4
fmap 2
acta
TWIN 1 0 0 0 -1 0 0 0 -1 2
OMIT -4 140
OMIT 1 2 2
OMIT -1 2 4
OMIT -1 2 6
OMIT 1 0 5
REM <olex2.extras>
REM <HklSrc "%.\\UrAc_213K.hkl">
REM </olex2.extras>

WGHT    0.095400    0.514300
EXTI    0.002293
BASF   0.05904
FVAR       3.96684
O1    4    0.924860    0.483802    0.367910    11.00000    0.03863    0.05095 =
         0.03433   -0.00089   -0.00557    0.00959
O2    4    0.582560    0.769254    0.630001    11.00000    0.04464    0.04624 =
         0.02388    0.00146   -0.00722    0.00037
O3    4   -0.030067    0.966707    0.359520    11.00000    0.03392    0.04608 =
         0.02856   -0.00053   -0.00538    0.00565
N1    3    0.753824    0.635749    0.494736    11.00000    0.03147    0.03719 =
         0.02951    0.00303   -0.00780    0.00197
AFIX  43
H1    2    0.858449    0.607399    0.534994    11.00000   -1.20000
AFIX   0
N2    3    0.614228    0.633443    0.328982    11.00000    0.03365    0.03981 =
         0.02655   -0.00146   -0.00653    0.00133
AFIX  43
H2    2    0.619609    0.604534    0.265557    11.00000   -1.20000
AFIX   0
N3    3    0.234960    0.876142    0.474666    11.00000    0.03250    0.03677 =
         0.02473   -0.00102   -0.00173    0.00208
AFIX  43
H3    2    0.183144    0.918274    0.530430    11.00000   -1.20000
AFIX   0
N4    3    0.273857    0.798936    0.313703    11.00000    0.03295    0.03690 =
         0.02249   -0.00135   -0.00480    0.00165
AFIX  43
H4    2    0.249224    0.785669    0.249542    11.00000   -1.20000
AFIX   0
C1    1    0.773258    0.578453    0.395721    11.00000    0.03327    0.03370 =
         0.03439    0.00353   -0.00693   -0.00232
C2    1    0.448270    0.734432    0.365220    11.00000    0.03229    0.03062 =
         0.02758   -0.00014   -0.00587   -0.00290
C3    1    0.427538    0.783010    0.464904    11.00000    0.03148    0.03449 =
         0.02610    0.00069   -0.00418   -0.00032
C4    1    0.586287    0.734115    0.538688    11.00000    0.03468    0.03073 =
         0.02908    0.00256   -0.00487   -0.00402
C5    1    0.142744    0.889197    0.381170    11.00000    0.03398    0.03365 =
         0.02542   -0.00020   -0.00230   -0.00359
HKLF 4


REM  urac_213k_a.res in P2(1)/n
REM wR2 = 0.1660, GooF = S = 1.068, Restrained GooF = 1.068 for all data
REM R1 = 0.0526 for 990 Fo > 4sig(Fo) and 0.0596 for all 1118 data
REM 111 parameters refined using 0 restraints

END

WGHT      0.0957      0.4961

REM Instructions for potential hydrogen bonds
EQIV $1 -x+2, -y+1, -z+1
HTAB N1 O1_$1
EQIV $2 -x+1/2, y-1/2, -z+1/2
HTAB N2 O3_$2
EQIV $3 -x, -y+2, -z+1
HTAB N3 O3_$3
EQIV $4 x-1/2, -y+3/2, z-1/2
HTAB N4 O2_$4

REM Highest difference peak  0.326,  deepest hole -0.225,  1-sigma level  0.063
Q1    1   0.4195  0.7830  0.6336  11.00000  0.05    0.33
Q2    1   0.4332  0.7783  0.5334  11.00000  0.05    0.31
Q3    1   0.9158  0.4830  0.3026  11.00000  0.05    0.24
Q4    1   1.0853  0.4293  0.3712  11.00000  0.05    0.22
Q5    1   0.5929  0.7423  0.4597  11.00000  0.05    0.22
Q6    1   0.0815  0.9709  0.5687  11.00000  0.05    0.21
Q7    1   0.9228  0.5076  0.4471  11.00000  0.05    0.19
Q8    1   0.2863  0.7810  0.6235  11.00000  0.05    0.18
Q9    1   0.2563  0.7659  0.4895  11.00000  0.05    0.17
Q10   1   0.4223  0.7203  0.4401  11.00000  0.05    0.17
Q11   1   0.5762  0.7692  0.3550  11.00000  0.05    0.16
Q12   1  -0.0795  0.9808  0.2896  11.00000  0.05    0.16
Q13   1   0.7935  0.5398  0.6350  11.00000  0.05    0.16
Q14   1   0.9095  0.4376  0.5554  11.00000  0.05    0.16
Q15   1   0.1146  0.9949  0.3686  11.00000  0.05    0.15
Q16   1   0.2377  0.9408  0.1702  11.00000  0.05    0.14
Q17   1   0.0048  1.0693  0.3764  11.00000  0.05    0.14
Q18   1  -0.1788  0.9990  0.3554  11.00000  0.05    0.14
Q19   1   0.4191  0.6452  0.5178  11.00000  0.05    0.14
Q20   1   0.5978  0.6430  0.4997  11.00000  0.05    0.14
;
_shelx_res_checksum                87206
_shelx_hkl_file
;
   0   0   1 6.60916 6.28881  13
   0   0  -1 2.12157 6.17726  15
   0   0  -2 36500.3 811.036  15
   0   0  -2 36551.5 813.833   8
   0   0  -3-9.12571 19.7943   8
   0   0  -3-15.2104 20.4417  15
   0   0  -4 59653.9 1364.18   8
   0   0   4 61454.8 1354.87  11
   0   0  -5 12.2681 22.9647   8
   0   0   5 17.7714 22.3877  11
   0   0  -6 69426.1 1584.40   8
   0   0   6 68929.0 1579.80   4
   0   0   6 67667.2 1568.26  11
   0   0  -7-13.1048 30.9951   2
   0   0   7 37.5968 36.3027   4
   0   0  -7 6.35778 28.6750   8
   0   0  -8 35217.8 929.506   2
   0   0   8 35386.8 924.332   4
   0   0  -8 35679.6 929.103   8
   0   0   9 36.4791 39.0214   4
   0   0  -9-19.1342 36.1016   2
   0   0  -9-9.29459 32.4715   8
   0   0 -10 1590.46 94.4433   6
   0   0  10 1745.99 150.571   4
   0   0 -10 1680.91 147.830   8
   0   0 -10 1686.62 149.311   2
   0   0 -11 8.80859 28.7866   6
   0   0 -12 8058.05 264.996   6
   0   0 -13-21.7569 29.1131   6
   0   0 -14 574.548 57.4682   6
   0   0 -15-11.7723 23.1832   6
   0   0 -16 724.929 45.2901   6
   0  -1   0 9.82423 7.11579   9
   0  -1   0 6.26613 5.12640  15
   0   1   0 2.72258 6.86618  13
   0   1   0 19.1653 11.0068  16
   0  -1  -1 367.409 25.4486   9
   0   1  -1 322.009 18.9757  10
   0  -1  -1 358.154 21.7647   8
   0  -1  -1 310.868 22.1619  15
   0   1  -1 323.994 21.5870  16
   0   1   1 299.896 25.1595  13
   0   1  -1 357.886 26.8910   7
   0   1  -2 38710.4 862.527   7
   0  -1  -2 38335.7 861.257  15
   0  -1   2 38043.7 832.626  11
   0  -1  -2 39286.6 863.639   9
   0   1   2 38520.4 867.168  13
   0   1  -2 38354.4 853.212  10
   0   1  -2 38141.5 839.678  16
   0  -1  -2 38829.9 857.653   8
   0  -1  -2 39227.4 863.285  17
   0  -1  -3 396.918 37.4184  17
   0  -1  -3 359.772 37.9242  15
   0   1  -3 410.070 39.6057   7
   0  -1  -3 376.945 39.1526   8
   0  -1  -4 6999.07 217.724  15
   0  -1  -4 6864.15 215.054   8
   0   1  -4 6718.42 212.591   8
   0   1   4 7116.06 220.132  11
   0  -1   5 69.4708 28.8827   4
   0   1   5 72.4835 32.5189   4
   0   1   5 69.2034 30.2531  11
   0  -1  -5 75.9363 31.0052   8
   0   1  -5 45.0993 28.0784   8
   0   1   6 4523.33 186.506  11
   0  -1  -6 4739.56 190.839   2
   0  -1   6 4004.50 177.268   4
   0  -1  -6 4393.83 184.453   8
   0   1   6 4349.04 181.354   4
   0   1  -6 4487.03 184.307   8
   0   1  -7 39.8155 30.6687   2
   0   1   7-13.1465 28.1256  11
   0  -1  -7-6.59774 27.4350   2
   0  -1  -7 13.1603 31.1266   8
   0   1   7-18.8759 26.9222   4
   0   1  -7-25.2889 29.2190   8
   0  -1   7-6.36862 28.7241   4
   0  -1  -8 1987.39 142.904   8
   0   1  -8 2330.08 148.058   8
   0  -1  -8 2176.61 147.036   2
   0   1   8 2095.54 144.884   4
   0   1  -8 2179.79 150.170   2
   0   1   8 2236.59 147.696  11
   0  -1   8 2221.37 148.722   4
   0   1  -9 553.066 79.4985   8
   0  -1   9 368.783 69.0384   4
   0  -1  -9 527.093 81.4663   2
   0   1  -9 481.206 75.8303   2
   0  -1  -9 452.034 75.1576   8
   0   1   9 446.848 73.6655   4
   0  -1 -10 112.251 50.6897   8
   0   1  10 31.7964 37.1128   4
   0   1 -10 161.365 54.3041   8
   0   1 -10 117.276 34.2149   6
   0  -1  10 224.947 58.2297   4
   0  -1 -10 135.547 33.2496  21
   0  -1 -10 122.605 52.7835   2
   0   1 -10 167.956 57.6348   2
   0  -1 -10 104.215 32.9364   6
   0  -1 -11 1693.70 98.1941  21
   0  -1 -11 1719.37 102.493   6
   0   1 -11 1717.54 100.728   6
   0   1 -12 3300.09 147.546   6
   0  -1 -12 3566.29 151.450   6
   0  -1 -12 3138.16 141.966  21
   0  -1 -13 314.472 48.1339   6
   0  -1 -13 299.888 43.9712  21
   0   1 -13 347.302 48.7987   6
   0   1 -14 404.239 48.6706   6
   0  -1 -14 414.075 48.9532   6
   0   1 -15 2.77593 22.7445   6
   0  -1 -15 2.73629 22.0774   6
   0   1  15 20.3966 20.9867  23
   0  -1 -16-1.68248 14.7924   6
   0   1 -16 3.45152 14.2462   6
   0   2   0 19402.3 465.532  16
   0   2   0 18795.3 462.188   7
   0   2  -1 253.848 34.3737   7
   0   2  -1 247.195 30.0988  16
   0  -2  -2 3248.72 118.214   9
   0   2  -2 3480.19 129.067   7
   0  -2  -2 3735.34 135.172  17
   0  -2  -2 3407.29 117.897  15
   0   2  -2 3457.37 114.368  16
   0   2   3 2531.91 112.346  11
   0  -2  -3 2600.74 115.634  17
   0   2  -3 2365.33 109.744   7
   0  -2  -3 2662.38 108.739  15
   0   2  -4 12448.6 352.478   7
   0   2   4 12094.6 355.507  11
   0  -2  -4 12883.4 355.017  17
   0  -2  -4 12151.7 345.097   8
   0   2   5 2680.88 138.521  11
   0  -2  -5 2385.81 123.390   8
   0   2   6 2501.26 145.115  11
   0  -2  -6 2454.62 137.549   8
   0   2   7 1255.87 110.822  11
   0  -2  -7 1182.19 102.167   8
   0   2   8 2881.72 181.518  11
   0   2   9 2632.78 184.824  11
   0  -2  -9 2678.01 122.943  21
   0   2  10 120.168 47.0001  11
   0  -2 -10 111.187 34.8561  21
   0  -2 -11 2074.61 113.920  21
   0  -2 -12 724.812 68.4833  21
   0  -2 -13 225.728 41.0466  21
   0  -2 -14 1225.27 75.7906  21
   0   2  15 32.9862 20.5715  23
   0   3   0 16.0237 23.2106   7
   0   3  -1 1327.52 84.7475   7
   0  -3  -2 20947.7 556.144  17
   0   3  -2 21358.2 550.470   7
   0   3  -3 641.791 63.6714   7
   0   3   3 574.244 58.0417  11
   0  -3  -3 558.850 64.9740  17
   0   3   4 1576.15 106.642  11
   0  -3  -4 1791.23 113.178  17
   0   3  -4 1691.51 108.866   7
   0   3   5 1531.59 111.875  11
   0  -3  -5 1315.51 104.623  17
   0   3  -5 1485.97 108.153   7
   0   3   6 3705.41 195.214  11
   0   3   7 460.355 73.1789  11
   0  -3  -8 301.981 41.2489  21
   0   3   8 230.476 37.6303  28
   0   3   9 467.743 85.2057  11
   0  -3  -9 442.754 51.7883  21
   0  -3 -10 2923.45 136.606  21
   0  -3 -11 575.123 61.0789  21
   0  -3 -12 300.222 46.5416  21
   0   3  12 353.935 48.3465  30
   0  -3 -13 3458.52 142.021  21
   0   3  13 3339.37 135.727  30
   0   3  14 9.66275 23.6514  23
   0  -3 -14 26.6867 22.1810  21
   0   3  15-4.33926 15.4725  23
   0   4   0 3168.62 158.705   7
   0   4  -1 486.240 61.8396   7
   0  -4  -1 492.589 64.9261  17
   0   4  -2 2514.22 141.921   7
   0  -4  -2 2387.00 143.918  17
   0   4  -3 974.255 89.8189   7
   0  -4  -3 972.049 91.8126  17
   0   4  -4 14511.8 460.468   7
   0  -4  -4 15249.6 475.752  17
   0  -4  -5 8886.96 338.385  17
   0   4  -5 8526.56 329.038   7
   0   4  -6 159.184 47.3151   7
   0   4   7 1972.11 108.714  28
   0   4  -7 2283.83 106.750  20
   0   4   7 2471.38 177.820  11
   0   4   8 637.935 62.3954  28
   0   4  -8 640.471 57.2937  20
   0   4   8 665.835 100.867  11
   0   4   9 2939.62 140.561  28
   0   4  -9 2828.85 127.907  20
   0   4  10 5701.31 207.883  28
   0  -4 -10 5578.77 203.892  21
   0  -4 -11 450.875 52.9223  21
   0   4  12 5434.25 188.437  30
   0  -4 -12 5356.55 188.992  21
   0   4  13 2054.79 98.7337  23
   0   4  13 2137.88 97.0082  30
   0  -4 -13 2003.65 95.4540  21
   0   4  14 596.436 42.5738  30
   0   4  14 586.670 44.1899  23
   0  -5   0 8.38944 29.3092  17
   0   5   0-8.26004 28.8571   7
   0   5   1 367.231 63.8670   7
   0   5  -1 259.240 56.3048   7
   0  -5  -1 285.896 60.8678  17
   0  -5  -2 579.581 79.5406  17
   0   5  -2 467.287 72.1807   7
   0  -5  -3 1039.55 110.599  17
   0   5  -3 963.154 103.044   7
   0   5   3 1007.41 104.313   7
   0   5  -4 56.1044 32.7038   7
   0  -5  -4 51.0981 38.5945  17
   0   5   4 61.5306 27.7400  24
   0   5  -4 107.527 28.6749  20
   0   5  -5 1421.75 84.6112  20
   0   5   5 1407.80 90.7183  28
   0   5   5 1379.27 86.4335  24
   0   5  -6 1167.99 78.1115  20
   0   5   6 1200.97 83.0343  24
   0   5   6 1135.85 83.3568  28
   0   5   7 226.762 42.7025  28
   0   5  -7 234.872 39.9453  20
   0   5  -8 914.258 72.5295  20
   0   5   8 889.697 76.6348  28
   0   5  -9 370.040 47.3595  20
   0   5   9 335.963 49.6964  28
   0   5 -10 78.0282 30.0410  20
   0   5  10 106.340 31.5868  30
   0   5  11 1281.09 78.9491  30
   0   5 -11 1283.10 74.8416  20
   0   5  12 494.318 46.3125  30
   0   5  13 6.25899 17.0942  30
   0   6   0 2164.18 121.529  29
   0   6   1 1441.59 97.1396  29
   0   6  -1 1269.35 91.2843  29
   0   6  -2 807.015 72.0986  29
   0  -6  -2 668.235 99.0531  17
   0   6   2 638.880 66.8191  29
   0   6   5 79.6965 30.6708  24
   0   6  -5 100.204 33.3870  20
   0   6  -6 781.364 65.0815  20
   0   6   6 616.223 62.8844  28
   0   6   7 3785.42 156.824  31
   0   6  -7 3365.39 145.141  20
   0   6   8 323.052 45.7302  31
   0   6  -8 344.997 46.7967  20
   0   6  -9 101.904 30.1484  20
   0   6 -10 23.8324 21.8782  20
   0   6 -11 366.010 35.6060  20
   0   6  12 882.396 45.7605  30
   0   7   0 15.4321 25.9412  29
   0   7   1 388.771 56.3647  29
   0   7  -1 350.907 53.6297  29
   0   7  -2 180.224 39.9695  29
   0   7   2 212.722 43.9737  29
   0   7   3 392.065 55.9294  29
   0   7   4 111.554 36.9524  29
   0   7   5 1287.50 91.1329  29
   0   7   6 273.920 45.6929  31
   0   7   6 216.864 42.1761  29
   0   7  -6 222.598 36.8148  20
   0   7  -7 326.007 40.4030  20
   0   7   7 349.233 48.5586  29
   0   7   7 357.968 44.6604  31
   0   7   8 30.5723 22.8669  31
   0   7  -8 14.1218 21.1253  20
   0   7   8-7.34764 23.4339  29
   0   7   9 129.927 28.5971  29
   0   7  -9 165.126 27.6164  20
   0   7  10 189.607 28.2386  29
   0   7 -10 228.458 25.7155  20
   0   8   0 3030.79 133.194  29
   0   8   1 126.665 32.7863  29
   0   8   2 655.277 55.5747  31
   0   8   2 689.510 60.3758  29
   0   8   3 164.569 31.3354  31
   0   8   3 165.286 34.6920  29
   0   8   4 10.5968 21.0751  29
   0   8   4-3.16162 21.6258  31
   0   8   5 1390.89 79.1470  29
   0   8   5 1443.75 77.4323  31
   0   8   6 685.820 52.2827  29
   0   8   6 729.471 51.1721  31
   0   8   7 1485.47 68.0302  31
   0   8   7 1418.76 69.4798  29
   1   0 -16 1.77347 14.7489   6
   1   0 -15 2018.13 91.9331   6
   1   0 -14 7.33347 26.9219   6
   1   0 -13 971.609 76.3557   6
   1   0 -12 4.53428 30.3332   6
   1   0 -11 2440.29 123.284   6
   1   0 -10 34.6432 34.9381   2
   1   0 -10-4.10209 26.1647   6
  -1   0  10-21.8033 39.6411   4
   1   0  -9 988.430 112.887   2
  -1   0   9 1063.91 112.861   4
   1   0  -8 50.4778 37.9594   2
   1   0  -7 3218.48 168.143  15
   1   0  -7 3544.51 183.456   2
   1   0  -6-17.0734 28.1185   2
  -1   0   6 4.82685 25.2951  13
   1   0  -6-27.6972 28.4867   8
   1   0  -6-5.16310 26.0358  15
   1   0  -5 26260.8 646.783  15
   1   0  -5 25022.4 655.167   8
  -1   0   5 25830.1 641.453  13
   1   0  -5 26276.5 654.886   2
   1   0  -4-7.34725 24.0106   2
   1   0  -4-3.29511 21.2788  15
  -1   0   4-3.18756 19.8169  13
  -1   0   3 8313.93 229.664  13
   1   0  -3 7934.61 236.555   2
   1   0  -2 6.09890 17.1540  12
  -1   0   2-8.05836 11.8401  16
   1   0  -2 2.21658 18.7033   2
   1   0  -1 20180.4 467.932  14
  -1   0   0 4.71718 14.4472   3
  -1   0   0 2.07402 5.64388   7
  -1   0  -1 2453.06 81.5530   1
  -1   0  -1 1093.43 56.9577   9
  -1   0  -2 2.19036 19.3840   9
  -1   0  -3 2508.88 101.756  10
  -1   0  -3 2279.75 100.368   9
  -1   0  -4 14.0773 22.7271  10
   1   0   4 3.61745 24.7442   4
   1   0   4 10.1845 20.2559  11
  -1   0  -4 3.51232 22.1218   9
  -1   0  -5 3899.00 171.356  10
   1   0   5 4258.44 170.751   4
   1   0   5 4179.26 165.159  11
   1   0   6 22.2093 30.6726   4
   1   0   6 15.2086 26.0725  11
  -1   0  -7 12239.9 393.059   8
   1   0   7 11411.1 384.996   4
  -1   0  -8 8.25131 31.1364   8
   1   0   8-8.10950 31.6753   4
   1   0   9 7851.53 335.514   4
  -1   0  -9 8866.78 350.904   8
  -1   0 -10 34.5240 41.8490   2
  -1   0 -10 55.8456 42.1498   8
  -1   0 -10 8.31260 25.8444   6
  -1   0 -11 2462.58 124.760   6
  -1   0 -12-27.4412 34.8282   6
  -1   0 -13 417.719 54.7944   6
  -1   0 -14-3.68417 27.0496   6
  -1   0 -15 314.354 39.4452   6
  -1   0 -16 6.91227 15.1939   6
   1  -1 -16 34.1612 15.2028   6
   1   1 -16 39.5164 16.9634   6
   1   1 -15 160.398 28.5316   6
   1  -1 -15 70.3310 24.6118   6
   1   1 -14 7.01445 25.2615   6
   1  -1 -14 20.8886 25.5627   6
   1  -1 -13 2977.65 133.766   6
   1   1 -13 2868.69 131.775   6
   1  -1 -13 2658.14 125.403  21
   1  -1 -12 1388.75 91.8659   6
   1  -1 -12 1301.62 88.3902  21
   1   1 -12 1406.34 93.1439   6
   1  -1 -11 299.216 46.7807  21
   1  -1 -11 200.758 42.3750   6
   1   1 -11 329.821 49.9140   6
   1   1 -10 2088.09 177.336   2
   1  -1 -10 2454.11 119.249  21
   1  -1 -10 2626.22 123.407   6
  -1   1  10 2476.99 183.678   4
   1   1 -10 2637.59 123.858   6
  -1  -1  10 2603.94 189.743   4
   1  -1 -10 2686.38 193.993   2
   1   1  -9 230.333 60.7870   2
   1  -1  -9 300.357 66.3841   2
  -1  -1   9 123.384 51.7679   4
  -1   1   9 311.075 66.0385   4
  -1   1   8 251.950 53.0758  11
   1  -1  -8 381.434 67.0854   2
   1   1  -8 321.558 61.2957   2
   1   1  -7 7979.42 293.765   8
   1   1  -7 8196.03 302.898   2
   1  -1  -7 8383.95 305.300  15
   1  -1  -7 8075.13 305.775   2
   1  -1  -6 3499.47 165.243   2
   1   1  -6 3096.18 158.125   2
   1  -1  -6 3186.95 157.642  15
  -1   1   6 3230.62 160.698  13
   1   1  -6 3280.74 155.824   8
   1   1  -5 854.132 69.4115   8
   1   1  -5 816.243 67.0594  15
   1  -1  -5 943.802 76.3983   2
  -1   1   5 862.230 73.2810  13
   1   1  -5 885.066 73.9779   2
   1  -1  -5 970.871 76.4160  15
   1  -1  -4 1128.11 74.4539  15
   1   1  -4 1062.28 72.8211   2
   1   1  -4 1101.01 70.5432   8
  -1   1   4 1112.79 75.2118  13
   1   1  -4 929.989 62.6788  15
   1  -1  -4 1099.76 73.1995   2
   1  -1  -3 1197.32 63.7909  17
   1   1  -3 1187.56 64.2999  15
  -1   1   3 1401.94 79.6980  13
   1   1  -3 1438.00 76.0474   2
   1  -1  -3 1284.43 72.9525   2
  -1   1   3 1303.28 66.2519  16
   1   1  -2 52249.1 1160.10   2
   1  -1  -2 51113.0 1165.69  12
   1   1  -2 51821.1 1146.71  12
  -1   1   2 53008.6 1161.33  16
   1   1  -1 786.410 42.7931  14
   1   1  -1 738.064 33.1152   7
  -1   1   1 798.295 48.0486  16
  -1   1   1 715.383 41.3301   3
   1  -1  -1 732.559 42.6981  14
   1  -1  -1 858.077 48.7453  12
  -1  -1   1 700.051 39.8449   3
  -1  -1   0 4951.29 138.551   3
  -1   1   0 5265.99 142.381   7
   1   1   0 4899.25 122.686   7
  -1   1   0 4759.39 139.234   3
  -1   1  -1 77.9636 14.6295   9
  -1   1  -1 108.229 22.3750   1
  -1  -1  -1 126.507 25.9314   9
  -1  -1  -1 56.4605 18.9350   1
  -1   1  -2 28159.8 660.673   7
  -1  -1  -2 28035.3 675.430   9
  -1   1  -2 28246.2 645.155   9
  -1  -1  -2 29097.5 653.946  10
   1   1   2 29593.8 673.839  11
   1   1   3 6746.51 210.190  11
  -1  -1  -3 6284.39 207.824   9
  -1  -1  -3 6676.50 195.612  10
  -1   1  -3 6493.04 199.178   7
  -1   1  -3 6665.06 205.727  10
   1   1   4 640.158 58.2020   4
  -1  -1  -4 785.844 66.4089   9
  -1   1  -4 702.107 58.6054  10
   1   1   4 774.202 64.8786  11
   1  -1   4 727.699 62.1739   4
   1   1   5 1509.85 96.4878   4
  -1  -1  -5 1600.56 99.5150   8
  -1   1  -5 1468.83 94.1436  10
   1  -1   5 1644.55 101.289   4
   1   1   5 1586.55 102.014  11
  -1  -1  -5 1573.35 101.528   9
   1   1   6 837.629 81.2784  11
   1   1   6 907.565 80.8971   4
   1  -1   6 913.369 84.1114   4
  -1  -1  -6 935.407 83.1881   8
  -1  -1  -7 1574.72 118.375   8
   1   1   7 1300.43 110.793  11
   1   1   7 1528.63 114.768   4
  -1   1  -7 1546.06 118.477   8
   1  -1   7 1616.30 116.760   4
  -1   1  -8 177.028 51.8471   8
   1   1   8 125.252 44.7156  11
   1   1   8 194.780 51.8994   4
   1  -1   8 156.587 50.6939   4
  -1  -1  -8 246.162 54.3918   8
  -1   1  -9 2028.63 154.689   8
  -1  -1  -9 2007.36 154.752   8
   1   1   9 2203.56 159.845  11
  -1  -1 -10 539.522 59.0336   6
  -1   1 -10 703.778 101.620   2
  -1  -1 -10 504.936 86.4404   8
  -1   1 -10 660.091 97.2948   8
  -1  -1 -10 709.465 100.140   2
  -1   1 -10 620.804 62.4345   6
  -1  -1 -10 677.440 62.0029  21
  -1   1 -11 646.836 65.7138   6
  -1  -1 -11 681.552 63.4396  21
  -1  -1 -11 714.116 65.2772   6
  -1  -1 -12 3177.18 143.293  21
  -1   1 -12 3234.87 145.989   6
  -1  -1 -12 3399.06 148.222   6
  -1  -1 -13 619.685 61.2252   6
  -1   1 -13 552.779 61.0131   6
  -1  -1 -14 41.7607 26.9626   6
   1   1  14 11.1233 23.9482  23
  -1   1 -14 17.6754 27.1557   6
  -1  -1 -15 35.9242 22.4185   6
  -1   1 -15 18.3368 20.4713   6
  -1   1 -16 163.985 21.1630   6
   1  -2 -15 236.231 30.8527  21
   1  -2 -14 1610.37 86.8458  21
   1  -2 -13 1415.45 88.7364  21
   1  -2 -12 101.324 33.3172  21
   1  -2 -11 6952.14 237.053  21
   1  -2 -10 3081.96 140.193  21
  -1   2  10 3468.20 224.814  11
   1  -2  -9 1634.58 94.2772  21
  -1   2   9 1709.31 148.174  11
   1   2  -9 1755.59 104.232  26
  -1   2   8 2085.33 157.104  11
   1  -2  -7 23742.0 669.069  15
   1  -2  -6 3636.16 177.714  15
  -1   2   6 3463.72 179.592  13
  -1   2   5 12272.5 377.138  13
   1  -2  -5 11901.6 366.043  15
  -1   2   4 2236.19 122.069  13
   1  -2  -4 2131.75 115.560  17
   1  -2  -4 2445.44 119.186  15
  -1   2   3 11590.3 350.565  13
   1   2  -3 11927.5 324.088   7
   1  -2  -3 12164.5 338.332  15
  -1   2   3 12497.9 345.408  16
   1  -2  -2 60120.9 1344.55  12
   1   2  -2 60320.4 1333.84   7
  -1   2   2 59544.1 1361.87  16
  -1   2   2 59140.4 1356.77  13
  -1   2   1 209569. 4539.78  13
   1  -2  -1 211693. 4532.60  12
  -1   2   1 210501. 4552.20  16
   1   2  -1 209832. 4524.76   7
  -1   2   0 122166. 2658.19  16
  -1   2   0 123586. 2652.51   7
  -1  -2   0 120234. 2644.21  17
   1   2   0 120126. 2629.60   7
  -1  -2  -1 46610.6 1065.44   9
  -1  -2  -1 46267.2 1057.74  17
  -1   2  -1 46343.9 1067.13  16
  -1   2  -1 46318.7 1060.79   7
  -1   2  -2 8875.38 264.812   7
  -1  -2  -2 9684.80 275.308   9
   1   2   2 8642.26 263.942  11
  -1   2  -2 9382.84 267.147  16
  -1   2  -3 55160.6 1259.52   7
  -1  -2  -3 54826.3 1268.85   9
   1   2   3 55846.5 1265.79  11
  -1   2  -3 53593.7 1244.61  10
  -1   2  -4 16451.4 453.940   7
   1   2   4 17090.8 467.139  11
  -1   2  -4 16504.5 442.680  10
  -1  -2  -4 16441.6 464.096   9
  -1   2  -5 1911.58 116.980   7
  -1  -2  -5 2135.63 126.482   9
  -1   2  -5 2012.93 119.645  10
   1   2   6 25320.2 691.565  11
   1   2   7 18895.4 583.169  11
  -1   2  -7 19812.8 571.080   8
   1   2   8 315.706 63.6229  11
  -1  -2  -9 1009.58 72.6192  21
   1   2   9 916.537 109.659  11
  -1  -2 -10 1704.94 101.965  21
   1   2  10 1917.21 102.881  30
   1   2  11 16857.6 452.240  30
  -1  -2 -11 16561.5 455.985  21
  -1  -2 -12 720.400 67.3143  21
  -1   2 -13 605.733 58.4764   6
   1   2  14 941.851 68.5954  23
   1   2  15 1851.02 83.9020  23
  -1   3  15 92.8886 22.5804  23
   1  -3 -14 281.704 36.5653  21
  -1   3  13 362.524 43.5388  30
   1  -3 -13 378.179 46.7656  21
   1  -3 -12 1131.24 81.9314  21
   1  -3 -11 2009.52 110.730  21
   1  -3 -10 75.8082 33.9888  21
   1   3 -10 69.9663 32.6037  26
   1  -3  -9 197.204 38.0998  21
   1   3  -9 173.978 39.5440  26
   1  -3  -8 1347.86 83.3856  21
  -1   3   8 1308.87 130.645  11
  -1   3   8 1415.70 86.1214  28
   1   3  -8 1313.64 90.3161  26
  -1   3   7 73.9632 44.7444  11
   1  -3  -5 2148.79 133.488  17
  -1   3   4 527.981 63.4274  13
   1  -3  -4 444.037 59.3434  17
  -1   3   3 3437.92 159.826  13
   1  -3  -3 3369.16 161.853  17
  -1   3   2 7731.68 266.195  16
  -1   3   1 14.6851 25.1723  16
  -1   3   1-9.20690 23.2132   7
  -1  -3   0 616.592 55.7995  17
  -1   3   0 617.914 61.2590  16
  -1   3   0 571.117 61.4309   7
  -1   3  -1 90.0170 32.1555  16
  -1   3  -1 74.8807 30.2845   7
  -1  -3  -1 109.741 30.7328  17
  -1  -3  -2 3889.07 168.816  17
  -1   3  -2 4082.04 172.607   7
  -1   3  -2 4081.71 164.716  16
   1   3   3 1169.21 87.0933  11
  -1   3  -3 1087.50 87.4693   7
   1   3   4 3039.38 157.070  11
  -1   3  -4 3190.84 160.906   7
   1   3   5 608.659 76.1934  11
  -1   3  -5 599.166 72.8867   7
  -1  -3  -5 650.077 76.1109   9
   1   3   6 3276.13 188.518  11
   1   3   7 737.570 93.4780  11
  -1  -3  -8 1448.85 87.4511  21
   1   3   8 1584.88 143.400  11
   1   3   8 1384.44 87.8515  28
  -1  -3  -9 69.2866 32.4118  21
   1   3   9 36.0657 45.3813  11
  -1  -3 -10-9.14422 26.8896  21
   1   3  10 70.3247 31.9671  30
  -1  -3 -11 3193.27 147.118  21
   1   3  11 3212.31 144.298  30
  -1  -3 -12 1762.57 101.657  21
   1   3  12 1764.55 99.7496  30
   1   3  13 104.558 30.4879  30
   1   3  13 79.0709 31.9581  23
   1   3  14-5.00540 18.8880  30
   1   3  14 15.1855 22.2987  23
   1   3  15 21.6937 16.4077  23
   1  -4 -14 10.3304 15.4535  21
  -1   4  14 1.93390 15.4810  30
  -1   4  13 869.559 59.1797  30
   1  -4 -13 814.307 58.3533  21
   1  -4 -12 72.9244 29.2284  21
   1  -4 -11 1785.71 100.565  21
   1  -4 -10 572.597 59.0567  21
  -1   4  10 475.898 54.7813  28
   1   4 -10 456.620 59.1322  26
   1   4  -9 201.888 39.9076  20
   1   4  -9 229.819 44.6424  26
  -1   4   9 164.686 38.4837  28
   1   4  -8 3366.78 141.756  20
  -1   4   8 3359.31 224.788  11
  -1   4   8 3529.52 151.393  28
  -1   4   8 3113.68 141.760  24
   1   4  -8 3162.84 152.165  26
  -1   4   7 480.585 52.0319  24
  -1   4   7 446.334 76.5993  11
   1   4  -7 466.341 49.9412  20
  -1   4   7 337.556 46.6595  28
  -1   4   6 2009.69 103.855  28
   1   4  -6 1996.48 99.1278  20
  -1   4   6 1920.25 100.719  24
   1  -4  -5 588.145 79.3083  17
   1  -4  -4 1550.38 122.890  17
   1  -4  -3 2693.97 164.691  17
  -1   4   2 2804.51 157.589   7
  -1   4   1 7495.55 283.041   7
  -1   4   0 1160.65 95.5939  16
  -1   4   0 1079.78 94.1028   7
  -1   4  -1 1289.78 98.9475  16
  -1   4  -1 1324.82 106.597   7
  -1  -4  -1 1378.85 103.998  17
  -1  -4  -2 671.686 75.0716  17
  -1   4  -2 674.728 76.8985   7
  -1   4  -3 5369.13 235.654   7
  -1  -4  -3 5250.85 238.147  17
  -1   4  -4 2703.14 165.712   7
  -1   4  -5 139.077 46.4808   7
  -1   4  -6 4340.32 230.028   7
   1   4   6 3751.18 155.523  28
   1   4   7 645.612 62.1287  28
   1   4   7 571.836 86.8401  11
   1   4   7 737.692 64.2004  31
   1   4   8 562.204 93.4518  11
   1   4   8 573.569 58.0839  30
  -1   4  -9 1356.12 84.8557  20
   1   4   9 1228.10 85.7962  30
  -1  -4 -10 152.910 36.8384  21
   1   4  10 266.127 45.4928  30
   1   4  11 453.769 56.9282  23
  -1  -4 -11 528.106 56.2899  21
   1   4  11 459.301 53.9377  30
   1   4  12 39.3052 27.7020  30
   1   4  12 68.5802 31.9368  23
   1   4  13 1755.62 85.4406  30
   1   4  13 1802.42 89.0872  23
   1   4  14-2.06330 15.9842  23
   1   4  14 17.4501 16.3609  30
  -1   5  13 633.487 43.1240  30
  -1   5  12 492.039 45.4873  30
  -1   5  11 206.214 36.6156  28
   1   5 -11 181.041 33.0040  20
  -1   5  10 511.192 56.1013  28
   1   5 -10 644.497 64.0476  26
   1   5 -10 591.441 55.6913  20
   1   5  -9 4.05727 23.8607  20
  -1   5   9 23.5368 27.6834  28
   1   5  -9 15.4403 27.4674  26
   1   5  -8 249.650 44.9317  26
   1   5  -8 172.946 37.4647  20
   1   5  -7 768.012 65.9891  20
  -1   5   7 826.422 71.3976  18
  -1   5   7 731.045 67.7821  28
  -1   5   7 676.905 64.7172  24
   1   5  -6 466.968 52.6402  20
  -1   5   6 569.214 57.9008  18
  -1   5   6 434.386 54.1551  28
   1  -5  -6 408.795 79.9981  17
  -1   5   6 501.720 55.6063  24
   1  -5  -5 578.732 91.8478  17
   1   5  -5 677.682 68.3716  29
  -1   5   5 680.266 62.4555  18
   1   5  -5 772.162 62.3053  20
  -1   5   5 572.998 60.2844  24
  -1   5   5 582.240 60.2719  28
  -1   5   4 3582.20 214.451   7
   1  -5  -4 3741.32 221.375  17
  -1   5   4 3464.14 147.332  18
   1   5  -4 3331.57 136.577  20
  -1   5   4 3622.95 146.408  24
   1   5  -4 3161.15 149.255  29
   1   5  -3 79.2204 30.1558  29
  -1   5   3 48.7692 35.5209   7
   1  -5  -3 79.9079 40.3411  17
  -1   5   3 112.515 30.9253  18
  -1   5   3 122.454 31.1753  24
   1  -5  -2 222.639 56.2732  17
  -1   5   2 215.125 56.7880   7
  -1   5   1 655.979 87.3149   7
  -1   5   0 3039.04 186.081   7
  -1   5  -1 1475.78 128.929   7
  -1   5  -2 177.324 55.0117   7
  -1   5  -3 48.2270 37.6884   7
  -1   5  -4 853.316 103.537   7
  -1   5  -5 3130.82 204.087   7
   1   5   6 154.211 40.5311  31
  -1   5  -7 148.573 35.4488  20
   1   5   7 137.975 38.3702  31
  -1   5  -8 177.730 36.9827  20
   1   5   8 153.126 38.1644  31
  -1   5  -9 194.758 37.3843  20
   1   5   9 178.657 37.5171  30
  -1   5 -10 638.504 57.1418  20
   1   5  10 658.554 60.3198  30
   1   5  11 1007.32 68.5811  30
  -1   5 -11 1022.67 64.8368  20
   1   5  12 67.3688 24.3499  30
   1   5  13 526.116 38.2296  30
  -1   6  12 1076.92 49.9494  30
   1   6 -11 1346.27 66.6169  20
  -1   6  11 1401.98 67.7511  30
   1   6 -10 179.262 32.3230  20
   1   6 -10 198.013 35.1675  26
   1   6  -9 984.031 68.9245  20
  -1   6   9 937.626 71.5143  28
   1   6  -9 1022.70 75.5100  26
   1   6  -8 2824.60 126.323  20
  -1   6   8 2647.39 131.296  28
   1   6  -8 2961.13 139.586  26
  -1   6   7 1559.73 97.5250  24
   1   6  -7 1842.80 110.066  26
   1   6  -7 1729.33 98.5465  20
  -1   6   7 1612.41 99.5661  28
   1   6  -6 6306.30 216.597  20
  -1   6   6 6264.76 223.552  28
  -1   6   6 6468.27 224.841  24
   1   6  -5 380.442 47.8411  20
  -1   6   5 425.626 51.4847  24
   1   6  -5 403.469 56.2458  29
  -1   6   4 166.547 38.4156  24
   1   6  -4 167.518 41.2979  29
   1   6  -3 188.262 44.9120  29
  -1   6   3 188.454 37.1961  24
   1   6  -2 617.957 68.4746  29
  -1   6   2 570.665 56.9002  24
   1   6  -1 3071.94 148.650  29
   1  -6  -1 2490.42 194.164  17
   1   6   0 3138.06 150.979  29
   1  -6   0 2512.95 191.210  17
   1   6   1 1398.82 99.1576  29
   1   6   2 2832.30 145.373  29
   1   6   3 827.001 76.4783  29
  -1   6  -5 27.8108 25.0417  20
   1   6   5 85.2755 36.0854  31
  -1   6  -6 1973.03 104.359  20
   1   6   6 1925.99 115.289  31
  -1   6  -7 582.903 56.7351  20
   1   6   7 697.368 65.4015  31
  -1   6  -8 2241.13 109.491  20
   1   6   8 2114.86 111.803  31
  -1   6  -9 994.991 68.3772  20
   1   6   9 992.538 69.7229  31
  -1   6 -10 248.010 34.7456  20
  -1   6 -11 1547.75 70.4647  20
   1   6  12 685.675 43.2990  29
   1   7  -9 55.1219 20.1897  26
   1   7  -9 40.4035 19.3719  20
  -1   7   9 59.4316 21.6741  29
   1   7  -8 916.140 59.6540  20
  -1   7   8 958.932 65.9118  29
   1   7  -8 974.402 66.2871  26
  -1   7   7 50.9019 26.5184  31
   1   7  -7 24.6929 23.3051  20
   1   7  -7 27.2016 22.1802  26
   1   7  -6 56.4782 25.5450  20
  -1   7   5 84.1124 33.1126  24
  -1   7   4 8.24260 24.5919  24
   1   7  -4-34.8591 31.7655  29
   1   7  -3 305.172 49.8387  29
  -1   7   3 435.671 49.9607  24
   1   7  -2 47.6277 33.3450  29
   1   7  -1 42.7769 32.3685  29
   1   7   0 198.895 45.5545  29
   1   7   1 10.7577 29.7127  29
   1   7   2 37.3852 29.9996  29
   1   7   3 10.5234 31.4038  29
   1   7   3 60.8462 29.0856  31
   1   7   4 56.2954 32.2601  29
   1   7   4 69.1721 31.7698  31
   1   7   5 581.451 62.7923  29
   1   7   5 679.119 63.7005  31
  -1   7  -6 265.603 37.9189  20
   1   7   6 267.344 43.5902  31
   1   7   6 227.523 43.1458  29
   1   7   7 127.194 31.7768  31
  -1   7  -7 117.478 28.2914  20
   1   7   7 122.786 33.6337  29
  -1   7  -8 361.734 38.5685  20
   1   7   8 302.256 38.9472  31
   1   7   8 242.590 38.3987  29
  -1   7  -9 65.6573 20.6328  20
   1   7   9 58.0099 20.5802  31
   1   7   9 70.6955 22.8561  29
   1   7  10 48.5729 17.9698  29
  -1   7 -10 86.6791 17.0409  20
  -1   8   7 149.147 23.4720  31
  -1   8   6 570.924 44.9856  31
   1   8  -6 599.836 45.2855  26
   1   8  -5 152.295 28.6121  26
  -1   8   5 167.074 30.1744  31
   1   8  -3 387.566 45.5757  29
   1   8  -2 66.4436 27.6281  29
   1   8  -1 121.457 33.5205  29
   1   8   0 460.723 53.2207  29
   1   8   1 98.1710 32.2869  29
   1   8   2 95.7805 31.5007  29
   1   8   3 888.431 67.5002  29
   1   8   4 40.9404 23.6078  31
   1   8   4 35.5062 25.8348  29
   1   8   5 57.5974 24.6289  29
   1   8   5 92.1718 24.0442  31
   1   8   6 206.882 30.9661  29
   1   8   6 159.537 27.8561  31
   1   8   7 248.744 29.4788  29
   1   8   7 320.784 30.8472  31
   1   9   0 1.90371 12.5898  29
   1   9   1 39.5455 15.2164  29
   2   0 -15-16.6316 18.8707   6
   2   0 -14 454.997 51.0233   6
   2   0 -13-8.04756 27.5234   6
   2   0 -12 6788.87 233.196   6
   2   0 -11-4.52151 26.5893   6
   2   0 -10 4778.58 190.773   6
   2   0  -9-3.95846 25.8721   6
   2   0  -9 9.83500 29.7561  15
   2   0  -8 8008.55 346.821   2
   2   0  -8 9790.05 354.683  15
   2   0  -7-7.31994 25.5734  15
   2   0  -7-8.20901 37.0246   2
   2   0  -6 3163.44 162.926  15
  -2   0   5 15.5209 22.1392  13
   2   0  -4 31644.1 778.573  12
   2   0  -3 75.0326 27.9244  12
  -2   0   2 11837.9 292.937   3
   2   0  -2 9971.85 287.696  14
   2   0  -1 3.28625 21.7329  14
  -2   0   1 3.37744 21.5427   3
  -2   0   0 63.8109 27.3410   3
  -2   0  -1 54.1401 26.8909   9
  -2   0  -1 43.7893 28.2376   1
  -2   0  -2 55022.6 1251.96   9
  -2   0  -2 54468.3 1251.36   1
  -2   0  -3 4.16236 25.5343   9
  -2   0  -4 72792.7 1664.17  10
  -2   0  -4 72628.3 1664.73   9
  -2   0  -5 5.57422 22.4901  10
  -2   0  -5 33.5981 24.6193   9
  -2   0  -6 2144.34 133.655   9
  -2   0  -6 2102.09 134.302  10
  -2   0  -8 685.764 93.9632   8
  -2   0  -9 57.3714 32.5471   6
  -2   0  -9-10.8434 36.2741   8
  -2   0 -10 43462.7 1028.64   6
  -2   0 -11 32.4228 35.5818   6
  -2   0 -12 2316.75 122.594   6
  -2   0 -13 24.2155 29.3556   6
  -2   0 -14 6076.83 197.165   6
  -2   0 -15-9.26430 17.3238   6
   2   1 -15 199.215 29.0333   6
   2  -1 -15 266.026 30.7850   6
   2   1 -14 62.4660 29.0691   6
   2  -1 -14 59.1421 26.8526   6
   2   1 -13 1203.66 82.4283   6
   2  -1 -13 1304.55 83.8688   6
   2  -1 -13 1427.51 84.1153  21
   2   1 -12 3057.65 139.087   6
   2  -1 -12 3053.76 139.130   6
   2  -1 -12 2814.44 132.550  21
   2   1 -11 850.117 72.4466   6
   2  -1 -11 710.268 70.5831   6
   2  -1 -11 854.365 71.4840  21
   2  -1 -10 321.252 48.1487   6
   2  -1 -10 300.393 44.5998  21
   2   1 -10 300.585 47.0868   6
  -2  -1  10 281.054 73.0890   4
   2  -1  -9 100.559 36.6874  21
   2  -1  -9 90.8735 36.8329   6
   2  -1  -9 74.0699 45.3534  15
   2  -1  -8 491.286 77.0721  15
  -2   1   8 384.569 70.9266  13
  -2   1   7 8239.05 316.991  13
   2  -1  -7 8095.25 315.018  15
  -2   1   6 820.208 87.0652  13
   2  -1  -6 829.722 87.1741  15
  -2   1   5 553.328 66.6555  13
   2  -1  -4 3581.63 159.900  12
  -2   1   4 3613.88 162.631  13
   2   1  -3 5468.78 189.600  12
   2  -1  -3 6044.90 210.730  12
  -2  -1   3 5713.62 198.534   3
  -2   1   3 5738.81 200.293   3
   2   1  -2 6416.28 209.539  14
   2  -1  -2 6338.54 210.248  14
  -2  -1   2 6434.85 207.530   3
   2  -1  -2 6851.06 220.909  12
   2   1  -2 6031.92 200.017  12
  -2   1   2 6312.66 207.812   3
  -2   1   2 6574.37 210.128  16
  -2   1   1 968.571 67.0561   3
   2  -1  -1 894.524 65.3874  14
   2   1  -1 888.374 62.8697  14
  -2  -1   0 13455.5 360.638   3
  -2   1   0 13593.9 363.391   3
  -2  -1  -1 1388.60 86.7809   9
  -2  -1  -1 1253.97 75.5373   1
  -2   1  -1 1421.15 80.1832   1
  -2   1  -2 3644.15 149.611   1
  -2  -1  -2 4055.87 164.557   9
  -2  -1  -2 3895.26 149.656   1
  -2  -1  -3 3439.13 139.272  10
  -2  -1  -3 2999.96 148.432   9
  -2   1  -4 5382.99 207.202  10
  -2  -1  -4 5057.63 192.179  10
  -2  -1  -4 5195.60 211.856   9
  -2   1  -5 2221.94 129.176  10
  -2  -1  -5 2133.87 122.441  10
  -2  -1  -5 1903.73 127.583   9
  -2   1  -6 3717.90 188.422  10
  -2  -1  -6 3751.00 192.288   9
  -2   1  -7 2095.16 146.706  10
  -2  -1  -7 2331.53 151.964   8
  -2  -1  -8 889.587 101.126   8
  -2   1  -9 2212.64 112.370   6
  -2  -1  -9 2210.85 111.638   6
  -2   1  -9 2594.38 184.718   8
  -2  -1  -9 2087.77 164.744   8
   2   1  10 28.9059 31.1131  23
  -2   1 -10 22.2181 32.6277   6
  -2  -1 -10 4.38104 31.2448   6
   2   1  11 1640.61 104.275  23
  -2  -1 -11 1764.32 101.792   6
  -2   1 -11 1547.92 99.2318   6
  -2  -1 -12 1519.66 94.9752   6
   2   1  12 1440.53 97.4907  23
  -2   1 -12 1513.14 96.1231   6
   2   1  13 109.970 33.2183  23
  -2  -1 -13 103.555 35.7558   6
  -2   1 -13 163.983 40.2396   6
  -2  -1 -14 171.022 32.8683   6
  -2   1 -14 234.068 36.6792   6
   2   1  15 36.5269 17.2101   5
   2  -1  15 20.0206 17.3881   5
   2  -2 -15 323.257 29.7728  21
   2  -2 -14 780.676 56.5390  21
   2  -2 -13 330.747 43.4759  21
   2  -2 -12 147.207 38.3035  21
   2  -2 -11 459.151 55.1917  21
   2  -2 -10 629.806 62.8285  21
   2  -2  -9 2810.96 128.883  21
  -2   2   9 2828.40 197.964  11
   2  -2  -9 2369.82 185.069  15
   2   2  -9 2639.03 136.805  26
   2  -2  -8 1649.76 90.7850  21
   2   2  -8 1455.58 95.0404  26
   2  -2  -8 1371.04 131.441  15
  -2   2   7 1903.70 147.063  13
   2  -2  -7 1749.52 137.373  15
  -2   2   6 814.659 92.8194  13
   2  -2  -6 756.835 88.2795  15
   2  -2  -5 6298.08 250.839  15
  -2   2   5 6480.39 259.832  13
  -2   2   4 3513.36 172.636  13
  -2   2   3 5254.71 209.458  13
   2  -2  -3 5528.76 205.823  12
  -2   2   3 5069.73 197.345  16
   2  -2  -2 16228.2 440.920  12
  -2   2   2 15507.7 441.958  16
  -2   2   1 182.844 35.7370   7
   2  -2  -1 111.091 34.3342  12
  -2   2   1 131.709 36.8691  16
  -2   2   0 198.927 38.3120  16
  -2   2   0 329.383 41.6924   7
  -2   2  -1 424.112 47.2912   7
  -2  -2  -1 371.216 55.1818   9
  -2  -2  -2 4225.68 183.956   9
  -2   2  -2 4332.07 168.103   7
  -2  -2  -3 690.070 79.7371   9
  -2   2  -3 468.006 55.4148   7
  -2   2  -4 767.150 74.8721  10
  -2  -2  -4 669.545 77.6489   9
  -2   2  -4 737.946 70.5326   7
  -2   2  -5 4024.88 190.568  10
  -2  -2  -5 3981.20 201.980   9
  -2   2  -6 7315.89 286.074  10
  -2  -2  -6 6785.06 290.452   9
  -2   2  -7 2996.22 181.183  10
  -2  -2  -8 462.662 53.1800  21
   2   2   8 534.485 54.7649  30
   2   2   9 3303.59 152.491  23
  -2  -2  -9 3493.90 147.984  21
   2   2   9 3281.27 144.280  30
  -2   2  -9 3643.73 225.866   8
   2   2  10 1390.49 96.7307  23
   2   2  10 1279.92 86.0350  30
   2   2  11 80.2442 35.4480  23
  -2   2 -11 64.6533 31.6934   6
   2   2  11 102.821 34.3380  30
   2   2  12 1182.10 87.2324  23
  -2   2 -12 1200.73 81.0872   6
   2   2  12 1180.02 79.9370  30
   2   2  13 55.8310 29.2928  23
  -2   2 -13 30.7883 25.1320   6
   2   2  14 64.0653 25.4076  23
   2   2  15 158.360 23.8171  23
   2  -3 -14 642.141 47.3992  21
   2  -3 -13 359.756 43.4299  21
   2  -3 -12 243.763 41.7200  21
   2  -3 -11-8.69234 28.0665  21
   2   3 -10 770.155 76.4480  26
   2  -3 -10 703.481 67.6568  21
   2  -3  -9 899.976 71.5677  21
  -2   3   9 880.718 71.3900  28
   2   3  -9 752.675 73.1479  26
   2  -3  -8 10.8700 34.6717  15
   2   3  -8 40.4559 29.7439  26
   2  -3  -8 28.3065 26.1200  21
  -2   3   7 887.694 109.588  13
   2  -3  -7 1031.07 71.2534  21
   2   3  -7 981.758 67.5832  20
   2  -3  -7 794.209 98.8634  15
   2   3  -7 1013.26 77.6319  26
   2  -3  -6 382.547 66.4559  15
  -2   3   6 468.526 74.9451  13
  -2   3   5 2494.25 161.022  13
  -2   3   4 5479.73 239.085  13
  -2   3   4 5165.49 229.643  16
  -2   3   3 4984.22 213.205  13
  -2   3   3 4700.19 211.059  16
  -2   3   2 800.901 80.9044  16
  -2   3   2 933.670 80.6075   7
  -2   3   1 2983.15 149.768   7
  -2   3   1 2881.89 151.920  16
  -2   3   0 1220.46 97.6430  16
  -2  -3   0 1403.98 104.065   9
  -2   3   0 1488.51 99.5011   7
  -2   3  -1 5069.85 201.372   7
  -2   3  -1 4632.67 204.087  16
  -2  -3  -1 4624.05 204.379   9
  -2   3  -2 326.771 51.2778   7
  -2   3  -2 340.718 52.7998  16
  -2  -3  -2 393.931 58.5785   9
  -2   3  -3 4136.27 193.289  16
  -2  -3  -3 4450.21 208.357   9
  -2   3  -3 4330.84 195.291   7
  -2  -3  -4 4138.53 209.399   9
  -2   3  -4 4143.62 197.159   7
  -2  -3  -5 1257.22 116.183   9
  -2   3  -5 1337.38 110.786   7
  -2  -3  -6 428.913 73.1433   9
   2   3   7 238.775 41.3740  23
   2   3   7 236.178 40.9295  31
   2   3   7 291.711 43.7853  30
   2   3   8 157.445 36.8823  23
   2   3   8 112.258 34.6934  30
   2   3   9 848.257 76.3725  23
   2   3   9 922.820 73.5054  30
   2   3  10 1718.97 108.104  23
   2   3  10 1717.95 102.278  30
   2   3  11 110.120 36.5301  23
   2   3  11 110.402 33.2537  30
   2   3  12 999.692 77.1136  23
   2   3  12 1117.53 75.8734  30
   2   3  13 170.832 35.8548  23
   2   3  13 159.490 31.7322  30
   2   3  14 85.9045 23.8372  23
   2  -4 -14 72.8534 17.6949  21
  -2   4  14 36.6150 15.0307  30
   2  -4 -13 613.906 47.3653  21
   2  -4 -12 969.944 67.4678  21
   2  -4 -11 403.598 49.3540  21
  -2   4  11 419.782 49.0829  28
   2  -4 -10 1516.36 92.0914  21
  -2   4  10 1288.34 89.0098  28
   2   4 -10 1221.06 95.6214  26
   2   4  -9 159.605 39.7259  20
  -2   4   9 173.077 38.4688  28
   2   4  -9 131.323 41.7942  26
   2   4  -8 16164.7 442.803  20
  -2   4   8 16941.1 458.083  28
   2   4  -8 16542.3 469.350  26
  -2   4   7 1798.75 159.522  11
   2   4  -7 1645.59 96.3362  20
  -2   4   7 1676.25 99.1204  18
  -2   4   7 1787.89 103.300  28
   2   4  -7 1910.67 113.512  26
  -2   4   6 805.349 71.1404  24
  -2   4   6 957.200 73.9168  18
   2   4  -6 970.202 72.6703  20
  -2   4   5 2531.94 119.297  18
   2   4  -5 2415.55 112.612  20
   2   4  -5 2423.84 123.831  29
  -2   4   5 2213.94 111.462  24
  -2   4   3 3172.07 181.582   7
  -2   4   2 59684.0 1478.29  16
  -2   4   2 61387.1 1469.14   7
  -2   4   1 9908.53 352.470   7
  -2   4   1 9502.55 359.348  16
  -2   4   0 37661.7 988.486  16
  -2   4   0 38241.3 976.400   7
  -2   4  -1 5732.50 254.576  16
  -2   4  -1 5798.88 253.617   7
  -2   4  -2 11876.6 402.703   7
  -2   4  -2 10923.3 386.757  16
  -2   4  -3 558.112 80.2752   7
  -2   4  -4 79.1724 40.6905   7
   2   4   5 8560.72 269.717  31
  -2   4  -5 8938.39 356.210   7
   2   4   6 8080.37 260.808  31
  -2   4  -6 8012.49 346.279   7
   2   4   7 286.555 44.2332  30
   2   4   7 233.702 43.8243  31
   2   4   8 2138.05 117.578  31
   2   4   8 2198.41 120.219  30
   2   4   9 135.450 35.6430  30
   2   4  10 4058.35 167.443  23
   2   4  10 4012.14 162.755  30
   2   4  11 99.2830 32.7363  30
   2   4  11 85.3797 32.8610  23
   2   4  12 1003.12 69.1515  23
   2   4  12 976.960 65.8822  30
   2   4  13 214.386 31.0310  23
   2   4  13 163.320 26.9341  30
  -2   5  13 18.3728 13.5550  30
  -2   5  11 245.598 37.2905  28
   2   5 -10 299.820 42.0802  20
  -2   5  10 337.715 45.8489  28
   2   5 -10 336.655 49.0377  26
   2   5  -9 39.0483 25.8812  20
  -2   5   9 111.035 34.7385  28
   2   5  -9 136.458 37.8399  26
   2   5  -8 1505.05 94.3221  20
  -2   5   8 1465.85 94.2175  18
  -2   5   8 1644.94 101.135  28
   2   5  -8 1565.08 104.372  26
  -2   5   8 1587.09 96.7145  24
  -2   5   7 76.3166 31.7186  24
   2   5  -7 30.0153 28.3867  20
  -2   5   7 65.0556 30.3990  18
  -2   5   7 57.0832 32.2083  28
   2   5  -7 92.2516 36.7353  26
   2   5  -6 203.662 40.1708  20
  -2   5   6 234.825 43.6481  18
  -2   5   6 227.870 42.1943  28
  -2   5   6 193.350 40.8146  24
   2   5  -5 16.3942 25.8176  20
  -2   5   5 30.8785 26.6966  24
   2   5  -5 42.4361 31.6525  29
  -2   5   5 9.24481 24.6721  18
  -2   5   5 22.2198 23.7200  28
  -2   5   4 111.586 32.5007  24
   2  -5  -4 164.737 53.1860  17
   2   5  -4 187.084 35.9110  20
  -2   5   4 161.063 35.3419  18
   2   5  -4 46.4580 31.7796  29
  -2   5   4 131.608 48.2869   7
   2  -5  -3 2370.75 178.346  17
  -2   5   3 2407.53 119.383  18
   2   5  -3 2253.84 123.430  29
  -2   5   3 2472.03 178.199   7
  -2   5   3 2516.30 119.665  24
   2   5  -2 763.490 70.2285  29
  -2   5   2 759.530 64.2089  18
  -2   5   2 906.340 105.112   7
  -2   5   2 839.366 66.3132  24
  -2   5   1 11.8474 24.2285  24
   2   5  -1 19.0618 26.3259  29
  -2   5   1 19.9832 34.9081   7
  -2   5   0 298.516 65.2388   7
   2   5   0 202.834 38.6973  29
  -2   5   0 249.320 39.8175  24
  -2   5   0 276.572 61.3328  16
  -2   5  -1 108.611 29.1055  24
  -2   5  -1 80.1624 44.1108   7
   2   5   1 103.882 32.3818  29
  -2   5  -1 160.917 48.6994  16
  -2   5  -2 142.694 50.4751   7
  -2   5  -2 163.214 33.8893  24
   2   5   2 171.917 38.6827  29
  -2   5  -3 672.297 95.1823   7
   2   5   3 628.827 62.0246  31
  -2   5  -3 669.999 59.9754  24
  -2   5  -4 175.468 59.7187   7
   2   5   4 218.328 40.6751  31
   2   5   5 4.63418 29.1869  31
   2   5   6 530.637 59.7885  31
   2   5   7 448.517 56.7405  31
   2   5   8 735.385 67.5409  31
  -2   5  -9 119.720 31.4756  20
   2   5   9 149.067 36.2812  31
   2   5   9 145.133 34.7873  30
  -2   5 -10 432.712 45.4814  20
   2   5  10 449.217 49.0636  30
  -2   5 -11 2212.89 95.2542  20
   2   5  11 2423.08 102.599  30
   2   5  12 111.607 23.0794  30
  -2   6  11 604.553 40.0256  30
  -2   6  10 46.5345 22.5428  28
   2   6 -10 26.0567 21.3015  26
  -2   6   9 687.751 60.2160  28
   2   6  -9 850.160 67.1893  26
   2   6  -8 143.052 32.9205  20
  -2   6   8 235.422 38.8186  28
   2   6  -8 231.636 43.1672  26
  -2   6   7 45.9537 28.6011  24
   2   6  -7 54.3159 29.3056  20
  -2   6   7 76.9901 30.8297  28
   2   6  -7 54.4454 31.5939  26
   2   6  -6 738.427 64.6977  20
  -2   6   6 677.728 65.8375  18
  -2   6   6 816.039 68.4504  28
  -2   6   6 818.563 69.5757  24
  -2   6   5 263.882 43.5486  24
  -2   6   5 155.448 39.4637  18
   2   6  -5 231.234 41.1894  20
   2   6  -5 276.113 51.7302  29
   2   6  -4 959.180 82.1177  29
  -2   6   4 1023.07 78.0667  24
  -2   6   3 485.728 58.5395  18
   2   6  -3 506.466 63.8202  29
  -2   6   3 411.189 54.4322  24
   2   6  -2 536.514 63.3553  29
  -2   6   2 468.488 55.3474  24
   2   6  -1 859.111 79.4426  29
  -2   6   1 985.801 75.7760  24
  -2   6   0 21.8738 24.9652  24
   2   6   0 37.8738 31.3514  29
  -2   6  -1 1071.89 77.3107  24
   2   6   1 1008.81 85.0946  29
   2   6   2 118.510 37.7229  29
   2   6   3 2770.41 134.943  31
   2   6   3 2814.50 144.935  29
   2   6   4 227.925 45.4024  31
   2   6   4 367.595 54.3354  29
   2   6   5 156.623 41.2750  29
   2   6   5 177.335 41.7171  31
  -2   6  -6 201.204 37.9952  20
   2   6   6 127.637 38.0713  31
  -2   6  -7 22.2886 24.5796  20
   2   6   7 60.1989 30.0548  31
  -2   6  -8 444.123 48.0917  20
   2   6   8 464.766 52.1264  31
  -2   6  -9 1887.70 90.2269  20
   2   6   9 1836.34 92.8364  31
  -2   6 -10 184.340 28.3251  20
  -2   6 -11 79.3372 18.1751  20
   2   7  -9 192.186 27.0521  26
   2   7  -8 136.309 28.4775  26
   2   7  -7 57.6618 25.2106  26
   2   7  -6 56.8678 27.1860  26
  -2   7   6 24.4121 24.1262  24
  -2   7   5 612.646 57.7983  24
   2   7  -4 561.369 62.9301  29
  -2   7   4 549.449 55.5839  24
  -2   7   3 73.7407 29.8610  24
   2   7  -3 128.857 38.1184  29
  -2   7   2 99.1662 30.9954  24
   2   7  -2 132.471 39.2051  29
  -2   7   1 115.231 33.5321  24
   2   7  -1 87.5897 34.9245  29
   2   7   0 880.904 78.0954  29
  -2   7   0 819.692 67.2183  24
   2   7   1 25.5480 29.6073  29
   2   7   2 311.094 49.2463  29
   2   7   3 77.8917 32.9766  29
   2   7   4 176.869 37.5740  31
   2   7   4 166.931 40.3945  29
   2   7   5 841.343 65.7277  31
   2   7   5 876.903 72.4403  29
  -2   7  -6 2.86108 19.9927  20
   2   7   6 19.5061 24.5719  29
   2   7   6 21.1029 25.5798  31
  -2   7  -7 20.8342 18.7609  20
   2   7   7 18.6726 21.2907  31
   2   7   7 16.8720 20.4227  29
   2   7   8 183.922 30.1707  31
  -2   7  -8 180.691 26.9215  20
   2   7   8 205.388 30.5204  29
  -2   7  -9 75.1760 18.6064  20
   2   7   9 127.602 22.2411  31
  -2   8   6 65.0700 18.5244  31
   2   8  -6 73.1473 19.0250  26
   2   8  -5 440.573 40.6145  26
  -2   8   4 534.378 44.8073  24
  -2   8   3 1198.08 66.8697  24
   2   8  -2 721.939 58.1897  29
  -2   8   2 529.536 45.9419  24
   2   8  -1 264.248 39.7178  29
   2   8   0 109.680 28.8915  29
   2   8   1 700.781 58.2562  29
   2   8   2 357.999 43.9678  29
   2   8   2 404.846 45.3862  27
   2   8   3 1456.46 81.1427  29
   2   8   4 1662.81 83.4434  29
   2   8   5 2338.18 96.0306  29
   2   8   5 2282.00 96.4114  27
   2   8   5 2309.63 90.1494  31
   2   8   6 49.6473 16.9789  29
   2   8   6 46.0576 17.3596  31
   2   8   6 46.7983 17.9773  27
   3   0 -15 101.464 20.5947   6
   3   0 -14 10.4588 19.9098   6
   3   0 -13 1549.46 88.2202   6
   3   0 -12-4.09061 28.2826   6
   3   0 -11 730.281 70.8566   6
   3   0 -10 22.6137 30.6015   6
   3   0  -9 5812.76 210.807   6
  -3   0   8 21.5066 37.5703   3
  -3   0   7 3143.94 197.076   3
   3   0  -7 3931.63 209.833  15
   3   0  -6 8.02498 28.0365  15
  -3   0   6 8.48407 25.6694   3
  -3   0   5 1363.00 113.835   3
   3   0  -5 801.951 90.5329  12
   3   0  -4 6.58207 24.8379  12
  -3   0   4 6.76370 25.5232   3
  -3   0   3 29363.6 776.718   3
   3   0  -3 31044.0 782.388  12
   3   0  -2 22.4935 28.3564  14
   3   0  -2-5.84201 32.2705  12
  -3   0   2 5.86276 28.3563   3
   3   0  -1 487.635 60.3825  14
  -3   0   1 1139.60 89.9542   3
   3   0   0 5.36581 22.3124  14
  -3   0  -1 5600.40 219.363   1
  -3   0  -1 5693.34 222.015   9
  -3   0  -2-5.70914 25.7494   9
  -3   0  -2 11.7135 28.3272   1
  -3   0  -3 1777.39 123.088   9
  -3   0  -3 1996.71 147.574   1
  -3   0  -4 40.1790 31.6882  10
  -3   0  -5 12347.2 409.205  10
  -3   0  -6 67.0738 36.8846  10
  -3   0  -7 3122.81 193.942  10
  -3   0  -8 12.7491 24.2460   6
  -3   0  -9 235.284 54.6064   6
  -3   0 -10-23.2227 34.1041   6
  -3   0 -11 2809.56 134.140   6
  -3   0 -12-4.10167 28.3591   6
   3   0  13 17.5135 24.2206   5
   3   0  14 12.9784 19.5915   5
   3   0  15 31.0308 13.5671   5
   3   1 -14 889.575 56.3104   6
   3  -1 -14 931.491 57.3763   6
   3   1 -13 807.807 61.9006   6
   3  -1 -13 871.912 63.9374   6
   3   1 -12 475.461 55.5054   6
   3  -1 -12 484.529 54.7816   6
   3  -1 -12 535.871 53.6989  21
   3  -1 -11 333.836 46.5760  21
   3   1 -11 311.797 47.3020   6
   3  -1 -11 290.559 46.1409   6
   3  -1 -10 12.9146 26.0490  21
   3  -1 -10-22.2378 31.3979   6
   3   1 -10 8.88298 29.7123   6
   3  -1  -9 367.683 50.9605  21
   3  -1  -9 211.501 44.3570   6
   3  -1  -8 21.7907 32.9764  15
   3  -1  -8 63.9103 29.3408  21
  -3  -1   8 32.1651 37.4679   3
  -3   1   8 43.0789 37.6356   3
  -3  -1   7 1246.25 122.641   3
  -3   1   7 1417.56 131.120   3
  -3   1   7 1764.36 143.526  13
   3  -1  -7 1657.51 90.7617  21
   3  -1  -7 1764.41 143.655  15
   3  -1  -6 1785.69 140.007  15
  -3  -1   6 1626.05 131.777   3
  -3   1   6 2012.14 150.126  13
  -3   1   6 1655.49 133.257   3
  -3   1   5 2483.40 154.650   3
  -3   1   5 2522.02 157.959  13
  -3  -1   4 547.794 72.9200   3
  -3   1   4 464.206 72.7639   3
   3  -1  -4 530.423 74.8746  12
  -3  -1   3 2318.00 140.523   3
  -3   1   3 2134.11 144.821   3
   3   1  -2 709.735 71.3060  14
   3  -1  -2 726.960 71.9447  14
   3  -1  -2 694.855 74.3567  12
   3   1  -2 710.862 70.4113  12
  -3  -1   2 808.969 76.6982   3
  -3   1   2 768.629 75.5547   3
   3  -1  -1 430.828 58.2115  14
   3   1  -1 313.610 49.7696  14
  -3  -1   1 505.551 62.5147   3
  -3   1   1 353.765 55.7935   3
   3   1   0 91.0236 34.6217  14
   3  -1   0 76.6618 32.7194  14
  -3  -1  -1 1291.07 95.9679   1
  -3   1  -1 1167.78 93.5776   1
  -3  -1  -1 1179.66 98.0350   9
  -3   1  -2 59.9860 38.2962   1
  -3  -1  -2 100.147 44.1832   9
  -3  -1  -2 76.2781 35.0464   1
  -3  -1  -3 16419.8 486.758   9
  -3   1  -3 15533.1 471.021   1
  -3  -1  -3 15399.2 469.302   1
  -3  -1  -4 4510.59 217.656   9
  -3   1  -5 774.349 90.0366  10
  -3  -1  -5 574.047 81.3628   9
  -3   1  -6 1282.16 119.937  10
  -3  -1  -6 1358.56 124.929   9
  -3  -1  -7 954.629 71.0403   6
  -3   1  -7 772.323 66.0022   6
   3   1   7 876.652 70.2993  23
  -3   1  -7 806.343 99.5218  10
  -3  -1  -7 857.140 103.478   9
   3   1   7 845.723 66.2456  30
   3   1   8 82.8315 31.8634  23
  -3  -1  -8 88.0674 30.8388   6
  -3   1  -8 42.6013 30.1243   6
  -3   1  -8 144.327 53.7245  10
   3   1   8 93.7077 30.2437  30
  -3  -1  -9 5740.27 206.879   6
   3   1   9 5749.94 213.953  23
   3   1   9 5547.60 201.509  30
  -3   1  -9 5807.48 207.609   6
   3   1  10 297.994 47.8603  23
  -3  -1 -10 271.324 47.0862   6
  -3   1 -10 248.415 44.1465   6
  -3  -1 -11 718.165 65.4100   6
  -3   1 -11 713.782 66.2704   6
   3   1  11 549.874 61.2331  23
  -3  -1 -12 674.108 61.4287   6
  -3   1 -12 584.698 59.2131   6
   3   1  12 613.299 59.8933  23
   3   1  13 186.481 33.2740   5
   3  -1  13 221.536 36.0830   5
   3   1  14 32.9733 18.5589   5
   3  -1  14 17.0871 17.5885   5
   3  -2 -14 228.938 28.5981  21
   3  -2 -13 1085.70 68.1545  21
   3  -2 -12 82.0643 31.7466  21
   3  -2 -11 315.507 47.1475  21
   3  -2 -10 1211.04 85.3174  21
   3  -2  -9 12133.1 352.683  21
  -3   2   8 2856.11 203.832  13
   3  -2  -8 2641.35 126.596  21
  -3   2   7 1414.56 139.279  13
   3  -2  -7 1507.05 89.5763  21
   3  -2  -7 1170.31 127.541  15
  -3   2   6 1064.13 112.944  13
   3  -2  -6 951.146 107.227  15
  -3   2   5 3868.18 214.100  13
  -3   2   4 796.323 92.3655  13
   3  -2  -4 848.697 92.7164  12
   3  -2  -3 8583.90 319.058  12
   3  -2  -2 7223.25 274.348  12
  -3   2   2 7008.48 269.039  16
   3  -2  -1 14143.0 427.110  12
  -3   2   1 12989.9 423.838  16
  -3  -2   0 11491.9 391.031   9
  -3  -2  -1 3976.51 200.851   9
  -3  -2  -2 3527.50 189.292   9
  -3  -2  -3 20765.8 614.036   9
  -3  -2  -4 580.786 81.0392   9
  -3   2  -5 708.255 88.0485  10
  -3  -2  -5 508.574 84.0969   9
  -3   2  -6 877.446 100.477  10
  -3  -2  -6 1045.95 114.557   9
   3   2   7 2838.65 132.974  23
  -3   2  -7 3065.55 196.405  10
  -3  -2  -7 2553.02 189.094   9
   3   2   7 2557.89 125.094  31
   3   2   7 2635.78 123.392  30
   3   2   8 2220.85 121.923  23
   3   2   8 2207.70 115.061  30
   3   2   9 14937.7 426.637  23
   3   2   9 14803.1 413.321  30
  -3   2 -10 1041.77 78.6754   6
   3   2  10 1086.46 85.8988  23
   3   2  10 1055.64 79.2692  30
   3   2  11 3347.17 151.274  23
   3   2  11 3351.09 142.239  30
   3   2  12 109.191 32.7108  23
   3   2  13 5041.95 171.498  23
   3   2  14 289.706 31.8236  23
   3  -3 -14-3.34690 14.2209  21
   3  -3 -13 882.125 56.7809  21
   3  -3 -12 280.658 39.6031  21
   3  -3 -11 66.8287 31.2492  21
   3  -3 -10 963.557 75.1154  21
   3  -3  -9 2972.64 134.762  21
   3   3  -9 2404.97 134.123  26
   3  -3  -8 94.9546 33.2117  21
   3  -3  -7 249.218 63.9799  15
  -3   3   7 413.594 80.7408  13
   3  -3  -7 333.572 45.2577  21
   3  -3  -6 30.9636 45.3746  15
  -3   3   6 22.4656 35.8268  13
   3  -3  -6 23.0785 27.7069  21
  -3   3   6 20.5006 23.7588  18
  -3   3   5 2114.43 163.443  13
  -3   3   5 2302.53 112.999  18
  -3   3   4 954.086 104.885  13
  -3   3   3 795.248 91.9505  13
  -3   3   3 1054.78 102.449  16
  -3   3   2 65.2835 33.9611  16
  -3  -3   1 2060.97 146.548   9
  -3   3   1 1647.80 129.573  16
  -3  -3   0 2463.82 163.653   9
  -3   3   0 2481.05 159.553  16
  -3  -3  -1 759.839 91.7379   9
  -3   3  -1 576.121 77.0424  16
  -3  -3  -2 263.559 56.8337   9
  -3   3  -2 318.777 61.1320  16
  -3  -3  -3 441.666 74.9249   9
  -3   3  -3 411.349 69.2749  16
  -3  -3  -4 422.335 78.2572   9
   3   3   5 470.358 54.2514  23
   3   3   5 400.691 48.3987  30
   3   3   5 413.697 53.4428  31
   3   3   6 951.537 76.3537  23
  -3  -3  -6 1122.33 123.757   9
   3   3   6 906.710 72.5909  31
   3   3   6 945.360 70.9155  30
   3   3   7 241.880 46.0143  23
   3   3   7 298.708 46.7313  30
   3   3   7 301.233 47.3170  31
   3   3   8 483.176 58.1799  23
   3   3   8 397.625 53.2558  31
   3   3   8 519.537 57.8405  30
   3   3   9 332.008 55.1317  23
   3   3   9 285.671 50.1473  30
   3   3  10 23.7353 31.0281  23
   3   3  10 8.52171 30.3871  30
   3   3  11 1089.67 80.5689  23
   3   3  11 1148.06 77.7269  30
   3   3  12 156.572 33.4465  23
   3   3  13 77.5773 24.3365  23
   3   3  14 59.6958 15.6500  23
   3  -4 -13 307.505 28.9214  21
   3  -4 -12 15.3772 19.8560  21
   3  -4 -11 203.137 34.6396  21
  -3   4  11 170.724 32.1739  28
   3  -4 -10 308.658 43.7164  21
  -3   4  10 289.837 42.4742  28
   3  -4  -9 324.660 49.1732  21
  -3   4   9 269.833 46.4576  28
   3   4  -9 439.406 62.1501  26
   3   4  -8-5.23001 26.3728  26
  -3   4   7 1805.61 104.775  18
   3   4  -7 1620.70 105.905  26
  -3   4   6 31.9264 29.8174  18
   3   4  -5 1894.71 105.325  20
  -3   4   5 2146.92 112.392  18
  -3   4   4 194.680 35.9520  18
   3  -4  -3 781.593 63.3213  22
  -3   4   3 896.954 69.0044  18
  -3   4   3 772.690 99.7726  16
  -3   4   3 826.121 65.2393  24
   3  -4  -2 766.787 62.1144  22
  -3   4   2 782.362 65.3543  18
  -3   4   2 576.819 87.6961  16
  -3   4   2 737.785 61.7405  24
  -3   4   1 270.425 39.7930  24
  -3   4   1 284.766 67.5097  16
  -3   4   0 291.927 62.2554  16
  -3   4   0 413.721 46.8155  24
  -3   4  -1 1788.75 148.269  16
  -3   4  -1 1806.97 97.7873  24
  -3   4  -2 1966.36 153.736  16
   3   4   3 379.799 49.0432  31
   3   4   4 30.5539 30.1855  31
   3   4   5 155.633 42.9385  31
   3   4   6 718.023 67.5860  31
   3   4   7 5061.16 193.593  31
   3   4   7 4764.71 182.147  30
   3   4   8 163.201 38.6141  31
   3   4   8 128.020 35.8800  30
   3   4   9 3616.60 149.280  30
   3   4   9 3643.33 155.991  23
   3   4   9 3578.39 153.502  31
   3   4  10 160.904 37.0919  23
   3   4  10 134.920 34.9871  30
   3   4  11 20.4670 23.0817  23
   3   4  12 329.520 36.2527  23
   3   4  13 3.44744 13.0091  23
  -3   5  11 52.9942 20.7064  28
  -3   5  10 1008.95 68.3987  28
  -3   5   9 23.2420 25.6330  28
   3   5  -9 69.3245 31.2183  26
  -3   5   8-8.16426 22.9219  18
  -3   5   8 4.30271 26.7495  28
   3   5  -8 19.1612 28.1698  26
  -3   5   7 170.088 38.4359  18
  -3   5   7 126.589 36.0428  28
   3   5  -7 157.001 40.3437  26
  -3   5   6 619.267 62.6758  18
  -3   5   6 681.574 66.1405  28
   3   5  -6 647.134 67.2624  26
  -3   5   5 26.3901 27.3676  24
  -3   5   5 95.0794 33.5803  18
  -3   5   4 4123.32 171.718  18
  -3   5   4 4249.49 170.547  24
  -3   5   3 269.049 46.9984  24
  -3   5   3 266.313 45.4914  18
  -3   5   2 654.407 63.2322  18
  -3   5   2 609.937 61.6714  24
  -3   5   1 30.5767 28.8947  24
  -3   5   0 1179.81 134.297  16
  -3   5   0 1570.71 95.3268  24
  -3   5  -1 4.36883 24.1337  24
  -3   5  -1-23.8058 33.9538  16
  -3   5  -2 74.6284 33.4628  24
   3   5   3 909.964 73.6338  31
  -3   5  -3 859.937 72.1086  24
   3   5   4 827.865 74.2930  31
  -3   5  -4 929.763 73.6524  24
  -3   5  -5 52.3294 28.1857  24
   3   5   5 61.7039 32.4881  31
   3   5   6 42.5328 33.3749  31
   3   5   7 54.7864 31.9214  31
   3   5   8 258.418 43.7068  31
   3   5   9 665.977 58.4517  31
  -3   5 -10 1504.77 75.2725  20
  -3   6  10 86.9766 20.7146  28
  -3   6   9 874.061 58.4313  28
   3   6  -9 872.068 61.9728  26
  -3   6   8 105.048 28.5917  28
   3   6  -8 136.985 32.6486  26
  -3   6   7 31.2317 24.5006  24
  -3   6   7 37.3664 27.1769  18
  -3   6   7-25.5970 26.0793  28
   3   6  -7 79.7315 30.8122  26
  -3   6   6 236.301 41.5405  24
  -3   6   6 396.237 49.7245  18
  -3   6   6 388.160 46.9836  28
   3   6  -6 296.294 48.9140  26
  -3   6   5 1000.78 76.7022  18
  -3   6   5 1156.42 80.4400  24
  -3   6   4 5165.91 193.068  18
  -3   6   4 4904.52 188.681  24
  -3   6   3 789.843 72.2758  18
  -3   6   3 914.396 76.7295  24
  -3   6   2 12560.8 364.045  24
  -3   6   1 5229.49 197.077  24
  -3   6   0 364.514 51.9509  24
   3   6   0 380.187 57.5995  27
  -3   6  -1 1337.87 90.5087  24
  -3   6  -2 2347.66 123.767  24
  -3   6  -3 4961.04 186.043  24
   3   6   4 10990.1 325.587  31
  -3   6  -4 10791.2 318.672  24
  -3   6  -5 280.872 41.5431  24
   3   6   5 182.951 41.6738  31
   3   6   6 239.665 41.3890  31
   3   6   6 163.381 39.5583  27
  -3   6  -7 423.571 44.8408  20
   3   6   7 368.657 46.6129  31
  -3   6  -8 209.885 33.4544  20
   3   6   8 210.881 35.6726  31
  -3   6  -9 426.312 38.1249  20
   3   6   9 394.545 39.1723  31
  -3   6 -10 15.2379 14.4924  20
   3   7  -8 71.1315 18.8141  26
   3   7  -7 88.4857 23.6496  26
   3   7  -6 94.8364 27.8477  26
  -3   7   6 71.2815 24.9450  24
  -3   7   5 77.9317 27.1505  24
   3   7  -5 166.400 33.5808  26
  -3   7   4 1221.96 77.0842  24
  -3   7   3 1067.22 72.6246  24
  -3   7   2 360.940 47.6743  24
   3   7  -2 471.676 53.7587  29
   3   7  -1 779.832 67.4793  29
  -3   7   1 837.292 65.2701  24
   3   7   0 436.190 52.3292  29
  -3   7   0 400.883 47.5698  24
  -3   7  -1 252.280 40.3945  24
   3   7   1 237.813 45.6180  27
   3   7   2 1119.83 81.8901  27
  -3   7  -2 1133.69 74.0322  24
  -3   7  -3 124.258 31.1515  24
   3   7   3 21.1167 31.9129  27
   3   7   4 59.5475 31.0377  27
   3   7   5 518.655 51.7653  27
   3   7   5 497.299 47.0693  31
   3   7   6 435.783 41.5365  31
   3   7   6 407.387 42.8768  27
  -3   7  -7 72.6076 18.2460  20
   3   7   7 74.4793 21.5697  31
  -3   7  -8 74.2568 17.1601  20
   3   8  -4 236.992 27.2462  26
  -3   8   4 228.020 26.1603  24
  -3   8   3 6.12786 15.6886  24
   3   8  -3-2.26062 14.2378  26
  -3   8   2 375.821 34.5223  24
  -3   8   1 93.2288 21.7946  24
  -3   8   0 41.4619 17.6235  24
   3   8   0 29.0375 20.2900  19
   3   8   0 38.1198 20.6779  29
   3   8   2 561.344 44.7691  27
   3   8   3-2.32444 16.4096  27
   3   8   4 444.042 36.2660  27
   4   0 -14 63.0598 16.8043   6
   4   0 -13 17.4464 18.9806   6
   4   0 -12 157.609 34.2579   6
   4   0 -11-3.91637 30.0801   6
   4   0 -10 14140.0 395.750   6
   4   0  -9 27.0259 29.7937   6
   4   0  -8 6842.52 230.257  21
   4   0  -7-4.06570 23.1950  21
  -4   0   6 1016.16 124.527   3
   4   0  -5-9.82937 29.7394  12
  -4   0   5 42.0579 38.2334   3
   4   0  -4 6933.56 297.747  12
  -4   0   4 5999.59 286.045   3
   4   0  -3 35.0873 29.3557  12
  -4   0   3 64.9946 42.9215   3
   4   0  -2 30181.4 822.689  14
   4   0  -2 30238.8 826.016  12
  -4   0   2 29528.0 826.479   3
   4   0  -1-8.19569 32.0124  14
   4   0   0 2427.74 158.208  14
  -4   0   0 2434.98 156.678   1
   4   0   1 16.6007 32.4227  14
  -4   0  -1 16.6947 27.9229   1
  -4   0  -2 8535.25 337.996   1
  -4   0  -3 9.27038 31.0087   1
  -4   0  -4 522.580 84.4606  10
   4   0   5-37.7507 26.4209   5
  -4   0  -5 9.76160 27.8479  10
  -4   0  -6 9201.63 378.034  10
   4   0   6 8952.78 282.221   5
   4   0   7-4.65634 28.1760   5
   4   0   8 3327.56 152.183   5
   4   0   9 42.7226 29.5252   5
   4   0  10 3508.95 154.387   5
   4   0  11 3.99206 23.1280   5
   4   0  12 3742.13 141.853   5
   4   0  13-2.42542 16.7694   5
   4   1 -13 148.813 26.9979   6
   4  -1 -13 136.642 26.5986   6
   4   1 -12 392.500 43.1157   6
   4  -1 -12 420.724 44.1419   6
   4  -1 -12 313.065 38.8210  21
   4  -1 -11 133.096 32.0198  21
   4   1 -11 149.587 36.9214   6
   4  -1 -11 218.419 38.5114   6
   4   1 -10 1476.77 92.6865   6
   4  -1 -10 1418.56 89.4150  21
   4  -1 -10 1467.99 92.8454   6
   4  -1  -9 1219.09 84.9314  21
   4   1  -9 1294.69 88.9957   6
   4  -1  -9 1417.34 91.2385   6
   4  -1  -8-4.37246 27.5386  21
   4  -1  -7 218.229 39.3520  21
   4  -1  -6 398.978 74.4861  15
  -4   1   6 261.822 66.3389  13
   4  -1  -6 467.152 52.9260  21
  -4  -1   6 303.213 70.1835   3
  -4   1   6 216.577 61.2512   3
  -4   1   5 1265.69 128.235  13
   4  -1  -5 1147.29 122.743  12
  -4  -1   5 1016.45 114.185   3
  -4   1   5 953.336 113.380   3
   4  -1  -4-9.89640 33.1047  12
  -4  -1   4 48.9946 40.7480   3
  -4   1   4 39.8122 36.1941   3
   4  -1  -3 844.160 97.6443  12
  -4  -1   3 843.770 103.260   3
  -4   1   3 940.152 107.619   3
   4   1  -2 418.770 71.6308  14
   4  -1  -2 374.267 71.2004  14
   4  -1  -2 352.272 66.8092  12
   4  -1  -1 648.496 80.4442  14
   4   1  -1 498.372 71.4129  14
  -4  -1   0 286.440 58.6617   1
   4   1   0 301.023 58.8938  14
   4  -1   0 257.088 53.8803  14
  -4   1   0 291.670 59.7219   1
  -4  -1   0 259.149 61.4934   9
   4   1   1-8.25793 30.0290  14
   4  -1   1-8.42870 34.0028  14
  -4  -1  -1 102.325 51.3847   9
  -4   1  -1 59.5172 38.3487   1
  -4  -1  -1 16.6901 29.1554   1
  -4  -1  -2 4436.02 230.507   9
  -4  -1  -2 4362.79 221.112   1
  -4  -1  -3 4044.31 226.158   9
   4   1   4 923.395 71.8648  23
  -4   1  -4 855.295 104.027  10
  -4  -1  -4 1110.91 117.377   9
   4   1   5 815.939 70.4970  23
  -4   1  -5 878.861 103.948  10
  -4  -1  -5 872.318 111.770   9
   4   1   5 856.018 69.8513   5
   4  -1   5 923.504 71.6407   5
   4   1   6 121.638 35.4209  23
  -4   1  -6 88.8367 47.5978  10
   4   1   6 165.871 36.4112   5
   4  -1   6 138.036 35.4724   5
   4   1   7 198.901 43.1832  23
   4   1   7 250.348 43.5560   5
   4  -1   7 209.224 40.3320   5
   4   1   8 1209.43 87.1430  23
   4   1   8 1157.28 83.1558   5
   4  -1   8 1062.99 81.8718   5
   4   1   9 2589.37 131.929  23
   4   1   9 2663.99 131.645   5
   4  -1   9 2708.10 133.162   5
   4   1  10 236.261 42.5681  23
   4   1  10 287.146 46.3086   5
   4  -1  10 298.199 44.8214   5
   4   1  11 552.331 55.4397  23
   4   1  11 500.779 51.7895   5
   4  -1  11 560.054 54.4732   5
   4   1  12 82.1116 24.6544   5
   4  -1  12 159.931 29.9330   5
   4   1  13 82.7213 20.3041   5
   4  -1  13 68.2529 20.0668   5
   4  -2 -13 402.463 34.3431  21
   4  -2 -12 288.466 35.6944  21
   4  -2 -11 80.9177 29.3089  21
   4  -2 -10 2156.75 110.436  21
   4  -2  -9 69.3949 30.6542  21
   4  -2  -8-4.44952 29.4260  21
   4  -2  -7 1830.45 105.561  21
   4  -2  -6 482.179 86.9868  15
  -4   2   6 556.250 92.2125  13
   4  -2  -6 480.373 53.2108  21
  -4   2   5-34.7835 38.7834  13
  -4   2   5-4.23159 22.9843  18
  -4   2   4 4985.63 267.511  13
   4  -2  -4 4918.21 182.068  22
   4  -2  -4 5233.33 269.959  12
  -4   2   4 5212.80 187.167  18
   4  -2  -3 1638.14 91.5880  22
   4  -2  -3 1496.58 136.730  12
   4   2  -3 1517.92 96.5732  19
  -4   2   3 1664.60 94.8013  18
   4  -2  -2 230.923 57.6171  12
   4  -2  -1 852.376 106.578  12
  -4  -2   1 704.797 98.9721   9
  -4   2   1 625.678 86.6147  16
  -4  -2   0 628.247 95.9374   9
  -4   2   0 606.666 85.6707  16
  -4  -2  -1 5915.75 293.059   9
  -4  -2  -2 1233.12 125.589   9
   4   2   3 615.312 60.3672  23
  -4  -2  -3 755.163 104.174   9
   4   2   4 984.413 79.6256  23
  -4   2  -4 888.802 115.246  10
  -4  -2  -4 968.288 120.555   9
   4   2   5 248.639 44.3912  23
  -4   2  -5 200.261 60.6143  10
  -4  -2  -5 209.145 64.6496   9
   4   2   6 180.857 39.6240  23
   4   2   7 6387.23 231.932  23
   4   2   8 1084.04 85.8541  23
   4   2   9-4.83005 27.9829  23
   4   2  10 83.8263 34.7916  23
   4  -2  10 74.7839 30.5361   5
   4   2  11 829.133 65.6680  23
   4   2  12 76.6345 24.0209  23
   4   2  13 67.8269 18.9282  23
   4  -3 -13 138.262 19.8167  21
   4  -3 -12 163.921 27.4342  21
   4  -3 -11 960.522 64.7368  21
   4  -3 -10 218.869 38.5138  21
   4  -3  -9 169.769 39.4779  21
   4  -3  -8-4.26805 27.2234  21
   4  -3  -7 1384.46 90.0021  21
   4  -3  -6 25.5388 26.8128  21
  -4   3   6 22.7815 27.5753  18
  -4   3   5 1149.92 83.7529  18
  -4   3   4 1146.81 130.809  13
   4  -3  -4 1347.28 86.7424  22
  -4   3   4 1317.42 89.6242  18
  -4   3   3 265.450 63.5087  13
   4  -3  -3 333.804 46.0643  22
   4   3  -3 410.785 55.3744  19
  -4   3   3 331.368 48.1046  18
   4  -3  -2 338.952 45.1790  22
  -4  -3   2 299.014 72.6681   9
   4   3  -2 358.577 50.6487  19
  -4   3   2 282.797 42.2155  18
   4   3  -2 286.619 46.1680  27
  -4   3   2 261.946 65.4657  16
   4  -3  -1 93.9807 32.2208  22
   4   3  -1 62.7655 31.5924  27
  -4  -3   1 35.4276 46.1510   9
   4   3  -1 69.8208 34.1463  19
  -4   3   1 61.0961 26.9788  18
  -4   3   1 116.545 48.9892  16
   4  -3   0 306.021 42.1159  22
   4   3   0 277.576 46.9085  27
  -4  -3   0 245.844 70.0599   9
   4   3   0 249.185 45.0033  19
  -4   3   0 161.480 53.4658  16
   4  -3   1 647.313 58.7600  22
  -4  -3  -1 529.661 89.1175   9
   4   3   1 677.159 66.7328  27
  -4   3  -1 763.655 100.170  16
  -4  -3  -2 470.737 85.5937   9
   4   3   2 345.754 51.1990  27
  -4   3  -2 388.057 77.6382  16
   4   3   3 1039.14 79.0170  23
   4   3   3 1108.43 78.6726  31
  -4  -3  -3 1029.47 123.984   9
   4   3   3 1039.77 83.4578  27
  -4   3  -3 1060.50 121.956  16
   4   3   4 1330.45 89.5288  23
   4   3   4 1298.40 88.2882  31
  -4   3  -4 1152.64 128.762  16
   4   3   5 1163.59 86.0565  23
   4   3   5 1046.64 82.4619  31
   4   3   6 319.142 51.2327  23
   4   3   6 348.060 50.9267  31
   4   3   7 1203.34 89.3117  23
   4   3   8-19.2127 27.8300  23
   4   3   9 4021.45 165.781  23
   4   3  10 110.900 33.5027  23
   4   3  11 120.636 30.6010  23
   4   3  12 12.1532 17.1612  23
   4  -4 -11 74.5226 21.1798  21
   4  -4 -10 530.860 47.0785  21
  -4   4  10 340.883 41.1378  28
   4  -4  -9 66.8822 28.8261  21
  -4   4   9 14.8394 24.8304  28
  -4   4   7 200.392 42.1264  18
  -4   4   6 848.525 73.5413  18
  -4   4   5 1246.39 88.5610  18
  -4   4   4 2775.08 135.261  18
   4  -4  -3 3102.89 143.012  22
  -4   4   3 2873.86 139.971  18
   4  -4  -2 1442.39 95.7821  22
   4   4  -2 931.092 89.1917  19
   4  -4  -1 2047.20 110.901  22
  -4   4   1 2087.90 109.918  18
   4   4  -1 2119.70 121.946  27
  -4   4   0 177.724 37.3971  24
   4   4   0 148.410 40.1820  27
   4  -4   0 209.269 39.5101  22
  -4   4  -1 129.154 41.2505  24
   4  -4   1 157.118 40.4028  22
   4   4   1 37.5328 38.3021  27
   4  -4   2 20567.2 540.836  22
   4   4   2 21249.1 566.461  27
  -4   4  -2 21071.8 545.293  24
   4  -4   3 4363.55 171.030  22
   4   4   3 3927.14 179.319  27
   4   4   4 3580.60 164.808  27
   4   4   4 3368.15 151.960  31
   4   4   5 90.5433 36.6519  31
   4   4   6 871.988 75.8764  31
   4   4   7 1175.00 83.2648  23
   4   4   7 1088.77 82.6250  31
   4   4   8 3280.46 142.856  23
   4   4   9 1669.03 91.3242  23
   4   4  10 2563.25 109.084  23
   4   4  11 223.160 29.1017  23
  -4   5  10 11.1080 15.6854  28
  -4   5   9 308.859 37.2900  28
  -4   5   8 22.8483 21.5924  18
  -4   5   8 27.3384 22.3414  28
  -4   5   7 91.4678 28.7959  18
  -4   5   7 42.0337 26.7353  28
  -4   5   6 1795.65 103.101  18
  -4   5   5 13.3214 27.6072  18
  -4   5   4 350.759 49.1875  18
  -4   5   3 969.824 76.5836  18
   4  -5  -2 3616.36 153.254  22
   4   5  -2 3781.10 170.383  19
  -4   5   2 3339.22 150.197  18
  -4   5   2 3555.84 151.673  24
  -4   5   1 83.8138 38.5836  24
   4   5  -1 114.645 42.7461  27
  -4   5   0 35.7066 26.2536  24
   4   5   0 16.0939 31.5527  27
   4   5   1 1915.74 119.726  27
  -4   5  -1 1939.94 109.815  24
   4   5   2 1468.61 107.291  27
  -4   5  -2 1723.67 102.792  24
  -4   5  -3 195.901 41.0294  24
   4   5   3 101.746 40.8960  27
  -4   5  -4 392.445 51.7626  24
   4   5   4 297.748 47.0510  31
   4   5   4 308.428 51.7990  27
   4   5   5 1089.68 78.4275  31
   4   5   5 1003.10 81.9332  27
  -4   5  -5 934.279 74.2282  24
   4   5   6 396.037 52.9832  31
  -4   5  -6 470.485 51.9241  24
  -4   5  -7 14.1511 24.2005  24
  -4   5  -8-3.03609 19.6060  24
  -4   5  -9 149.999 25.6724  24
  -4   5 -10 59.0437 16.7166  20
  -4   6   9 24.4974 13.4918  28
  -4   6   8 66.0399 19.7822  28
  -4   6   7 307.880 36.1947  18
  -4   6   7 301.428 35.2673  28
  -4   6   6 19.2172 22.3790  18
  -4   6   6-5.84986 18.8882  28
  -4   6   5 222.122 36.5678  18
  -4   6   4 14.0043 22.3312  24
  -4   6   4-14.8944 24.0457  18
  -4   6   3 355.874 46.3252  24
  -4   6   3 386.681 47.0208  18
  -4   6   2-7.81984 25.8576  24
   4   6  -2 27.2398 27.4720  19
  -4   6   1 4.00078 23.1797  24
   4   6  -1 23.9882 29.8273  19
  -4   6   0 101.010 31.6655  24
   4   6   0 148.925 39.9070  27
  -4   6  -1 221.211 39.7941  24
   4   6   1 203.972 42.2222  27
  -4   6  -2 346.788 46.2781  24
   4   6   2 254.536 46.5309  27
  -4   6  -3 307.169 43.6887  24
   4   6   3 259.719 44.9601  27
  -4   6  -4 96.2933 28.6515  24
   4   6   4 145.007 37.5754  27
   4   6   5 343.311 42.0985  31
   4   6   5 410.255 48.5091  27
  -4   6  -5 397.455 43.5957  24
  -4   6  -6 371.534 39.7824  24
  -4   6  -7 562.534 42.7409  20
  -4   6  -7 472.382 40.4991  24
  -4   6  -8 411.296 33.5066  20
  -4   7   5 164.001 24.4454  24
  -4   7   4 444.379 39.5003  24
  -4   7   3 631.135 48.6946  24
  -4   7   2 135.556 28.5981  24
  -4   7   1 37.3194 21.2810  24
   4   7  -1 9.77049 22.0393  19
  -4   7   0-20.2788 21.6685  24
   4   7   0-10.2723 21.8411  19
   4   7   0 3.10336 20.0415  27
  -4   7  -1 70.9979 23.4931  24
   4   7   1 86.1523 29.1174  19
   4   7   1 61.1757 26.2240  27
  -4   7  -2 311.162 36.2370  24
   4   7   2 372.747 44.3831  19
   4   7   2 376.967 42.7751  27
  -4   7  -3 87.2665 24.4050  24
   4   7   3 18.4248 21.2609  19
   4   7   3 66.7148 26.3322  27
  -4   7  -4 259.694 30.7444  24
   4   7   4 218.877 31.9642  19
   4   7   4 287.183 35.6246  27
   4   7   5 298.550 31.7364  27
  -4   7  -5 272.060 27.7914  24
   5   0 -12 9.99657 17.4632   6
   5   0 -11 383.677 41.3445   6
   5   0 -10 3.40870 24.3084   6
   5   0  -9 168.097 37.9836   6
   5   0  -8-3.91842 26.5094  21
   5   0  -7 1774.12 101.322  21
   5   0  -5 1070.20 87.3277  19
   5   0  -4 48.4971 33.5112  19
   5   0  -4 32.7093 33.4538  25
   5   0  -3 897.136 111.885  12
   5   0  -3 926.978 79.5976  19
   5   0  -3 856.556 72.7903   5
   5   0  -3 939.727 81.9365  25
   5   0  -2 13.3755 23.7930   5
   5   0  -2-11.4798 30.6313  12
   5   0  -2-10.6766 26.3747  19
   5   0  -2 10.8485 29.9628  25
   5   0  -1 4831.56 264.142  14
   5   0  -1 4784.19 264.758  12
   5   0  -1 4455.89 189.407  19
   5   0  -1 4475.92 176.930   5
   5   0  -1 4680.27 192.037  25
  -5   0   0 11.4305 30.5003   1
   5   0   0 45.1622 39.4451  14
   5   0   0-8.86038 27.1780   5
   5   0   0 20.6118 27.0042  19
   5   0   0 5.27174 28.1337  25
   5   0   1 6198.74 308.709  14
  -5   0  -1 5946.30 308.160   1
   5   0   1 6500.56 226.016   5
   5   0   1 6351.91 231.613  25
   5   0   2-11.6334 40.6423  14
   5   0   2 4.54212 22.4411   5
   5   0   3 138.682 39.1169   5
   5   0   4 9.43165 28.1367  23
   5   0   4-4.70648 24.2027   5
   5   0   5 1734.62 105.278   5
   5   0   6 9.52597 28.4187   5
   5   0   7 10486.5 319.775   5
   5   0   8 17.6066 27.3670   5
   5   0   9 7.96452 24.4299   5
   5   0  10-3.40235 21.9712   5
   5   0  11 358.017 37.3078   5
   5   0  12-11.2692 13.2614   5
   5   1 -12 909.857 49.7199   6
   5  -1 -12 1053.85 52.7328   6
   5  -1 -11 78.2545 23.0943  21
   5   1 -11 71.4063 23.6604   6
   5   1 -10 763.243 59.2214   6
   5  -1 -10 702.779 58.4798   6
   5  -1 -10 737.527 56.9517  21
   5  -1  -9 743.898 62.3291  21
   5   1  -9 756.163 63.2236   6
   5  -1  -9 701.782 62.7336   6
   5  -1  -8 404.194 50.1516  21
   5  -1  -7 21.6220 29.9024  21
   5  -1  -6 239.473 43.4299  21
  -5   1   5 1311.24 88.3458  18
   5   1  -4 1311.78 96.6453  19
  -5   1   4 1240.96 87.3032  18
   5   1  -4 1375.23 97.8437  25
   5  -1  -3 196.645 42.9389  19
   5   1  -3 329.340 53.8398  19
   5   1  -3 185.013 44.5027  25
   5  -1  -2 102.507 33.4328   5
   5  -1  -2 156.459 56.9887  12
   5  -1  -2 102.488 37.3829  19
   5   1  -2 188.451 43.5169  19
   5  -1  -2 82.3622 35.1164  25
   5   1  -2 152.680 39.7386  25
   5   1  -2 114.097 31.3996   5
   5   1  -1 44.6449 35.6084  14
   5  -1  -1 102.145 47.2030  14
   5   1  -1 39.1676 26.3517   5
   5  -1  -1 66.3651 31.5659   5
  -5  -1   1 33.9395 36.0928   1
   5  -1  -1 83.8124 43.5481  12
   5  -1  -1 79.3681 33.7632  19
  -5  -1   1-37.6453 59.3662   9
   5   1  -1 42.6834 31.3902  19
   5  -1  -1 32.3587 31.2597  25
   5   1  -1 21.7182 31.4707  25
   5   1   0 133.336 51.4235  14
   5  -1   0 68.1522 45.9019  14
   5   1   0 130.771 34.9987   5
   5  -1   0 141.951 35.6128   5
  -5   1   0 92.0577 49.3113   1
   5  -1   0 134.996 51.1031  12
  -5  -1   0 101.859 45.7369   1
   5  -1   0 191.012 44.2614  19
   5   1   0 126.082 37.1861  19
  -5  -1   0 160.211 66.9861   9
   5  -1   0 94.8965 35.7701  25
   5   1   0 172.323 41.4498  25
   5   1   1 45.0067 35.9186  14
   5  -1   1 45.8693 40.0932  14
   5   1   1 65.9149 29.4392   5
   5  -1   1 107.426 31.9593   5
   5   1   1 97.9332 34.5175  19
   5   1   2 172.033 53.0883  14
   5  -1   2 93.5839 47.2845  14
   5   1   2 169.333 37.4495   5
   5  -1   2 127.207 35.3195   5
   5   1   3 137.062 37.0369  23
   5   1   3 131.199 34.8475   5
   5  -1   3 106.183 33.6775   5
   5   1   4 123.764 39.7873  23
   5   1   4 224.975 42.5869   5
   5  -1   4 159.395 41.3706   5
   5   1   5 586.344 63.6092  23
   5   1   5 518.430 59.5808   5
   5  -1   5 501.379 59.8937   5
   5   1   6 1149.65 85.7396  23
   5   1   6 1067.25 80.7022   5
   5  -1   6 1100.94 82.5209   5
   5   1   7 402.666 53.7504  23
   5  -1   7 402.408 51.9383   5
   5   1   7 468.957 52.3393   5
   5   1   8 740.198 65.9245  23
   5   1   8 758.189 65.8024   5
   5  -1   8 872.023 71.2982   5
   5   1   9 1107.99 75.9217  23
   5   1   9 1031.53 72.7647   5
   5  -1   9 1021.97 73.7017   5
   5   1  10 135.715 30.2428  23
   5   1  10 170.623 31.4126   5
   5  -1  10 186.059 32.7716   5
   5   1  11 9.77014 17.2461   5
   5  -1  11 20.3831 17.9898   5
   5   1  12 8.02392 11.5624   5
   5  -1  12 25.8709 14.3470   5
   5  -2 -11 1729.44 78.0654  21
   5  -2 -10 1166.98 70.3980  21
   5  -2  -9 1541.71 87.5745  21
   5  -2  -8 51.4347 30.9272  21
   5  -2  -7 224.324 41.8770  21
   5  -2  -6 932.636 75.6516  21
  -5   2   6 903.147 74.0516  18
   5  -2  -5 1028.72 79.0196  21
  -5   2   5 1020.98 80.1405  18
   5  -2  -4 8119.11 259.990  22
   5   2  -4 8013.31 277.458  19
  -5   2   4 8090.15 266.827  18
   5  -2  -3 1044.56 78.4828  22
   5   2  -3 1357.11 97.4162  19
  -5   2   3 1232.92 87.1620  18
   5   2  -3 1194.20 94.4683  25
   5  -2  -2 220.629 44.0835  22
   5   2  -2 252.861 49.7948  19
  -5   2   2 181.323 42.7044  18
   5  -2  -1 1967.16 108.606  22
   5   2  -1 1921.77 120.197  19
  -5   2   1 1815.74 107.312  18
   5  -2   0 534.717 57.6693  22
   5   2   0 653.574 70.7000  19
  -5   2   0 519.973 58.4417  18
   5  -2   1 12987.5 371.891  22
   5   2   1 13069.4 391.062  19
   5   2   2 7715.18 266.680  19
   5   2   3 4918.75 196.187  23
   5   2   4 1411.66 99.4207  23
   5   2   5 3052.88 147.025  23
   5   2   6 4.91570 31.3544  23
   5   2   7 333.150 49.1505  23
   5  -2   7 284.304 42.8689   5
   5   2   8 202.870 40.0684  23
   5  -2   8 153.583 34.3986   5
   5   2   9 2076.04 106.210  23
   5  -2   9 2158.60 101.676   5
   5   2  10 34.1510 22.8060  23
   5   2  11 323.491 33.3411  23
   5  -3 -11 57.7133 18.3207  21
   5  -3 -10 2.46669 17.5906  21
   5  -3  -9 93.7423 28.1872  21
   5  -3  -8 146.037 32.4785  21
   5  -3  -7 137.274 33.8263  21
  -5   3   7 89.8327 29.3060  18
   5  -3  -6 2507.73 120.990  21
  -5   3   6 2694.91 127.956  18
   5  -3  -5 49.4273 28.1798  21
  -5   3   5 9.13305 26.0585  18
   5   3  -4 507.647 60.9337  19
  -5   3   4 370.958 51.8126  18
   5  -3  -3 2639.99 130.876  22
   5   3  -3 2773.95 142.545  19
  -5   3   3 2745.42 134.660  18
   5  -3  -2 569.740 58.9969  22
   5   3  -2 466.659 61.5099  19
  -5   3   2 653.558 64.2798  18
   5  -3  -1 301.745 58.5687  22
   5   3  -1 246.871 49.2963  19
  -5   3   1 227.987 45.1408  18
   5  -3   0 1614.25 99.3690  22
   5   3   0 1445.05 102.654  19
   5  -3   1 6181.72 221.712  22
   5   3   1 6515.28 240.340  19
   5  -3   2 453.137 54.6433  22
   5   3   2 458.367 60.3569  19
   5   3   3 24.0939 35.0678  23
   5  -3   3 101.293 37.1694  22
   5   3   4 923.930 79.0585  23
   5   3   5 1619.59 100.857  23
   5   3   6 68.3864 34.4382  23
   5   3   7 527.937 57.2590  23
   5   3   8 702.685 60.5349  23
   5   3   9 1348.44 77.8567  23
   5   3  10 33.3751 20.3994  23
   5   3  11 87.1251 18.9627  23
   5  -3  11 70.1686 15.2192  22
  -5   4  10 15.2738 12.8120  28
  -5   4   9-21.9052 18.0437  28
  -5   4   8 42.5356 21.0260  28
  -5   4   7 286.474 39.5362  18
  -5   4   6 325.156 44.7045  18
  -5   4   5 293.136 44.3299  18
  -5   4   4 1242.90 86.3575  18
   5   4  -3 40.5817 31.5630  19
  -5   4   3 80.1016 30.4664  18
   5  -4  -2 4.44568 25.7560  22
   5   4  -2-5.31648 28.8739  19
  -5   4   2-8.84793 27.1391  18
   5  -4  -1 22.3181 25.0701  22
   5   4  -1 5.44525 34.7363  19
  -5   4   1 47.3903 26.7894  18
   5  -4   0 722.472 65.9198  22
   5   4   0 733.632 75.6738  19
   5  -4   1 328.594 46.2088  22
   5   4   1 340.947 55.0314  19
   5   4   1 325.657 52.9476  27
  -5   4  -2 57.9801 29.5336  24
   5  -4   2-17.5545 25.0371  22
   5   4   2-10.5005 28.0181  19
   5   4   2-15.7619 30.8964  27
   5  -4   3 1112.28 77.7498  22
   5   4   3 1069.83 84.5809  19
   5   4   3 885.977 78.8443  27
  -5   4  -3 960.328 72.9195  24
  -5   4  -4 317.106 44.9443  24
   5  -4   4 434.676 50.9710  22
   5   4   4 289.649 49.1444  27
  -5   4  -5 218.984 38.2425  24
   5  -4   5 163.970 34.5576  22
   5   4   6 356.537 44.9294  23
   5  -4   6 339.430 42.6666  22
   5   4   7 174.109 33.4367  23
   5  -4   7 154.286 28.9627  22
  -5   4  -8 33.8335 20.5055  24
   5   4   8 17.2210 18.0780  23
   5  -4   8-7.88464 17.7819  22
  -5   4  -9 87.7269 21.2366  24
   5   4   9 82.2893 21.2052  23
  -5   4 -10 277.111 26.0318  24
  -5   5   8 393.805 33.6455  18
  -5   5   8 354.130 33.3179  28
  -5   5   7 163.335 27.5389  18
  -5   5   7 131.947 27.0214  28
  -5   5   6 12.1226 20.0432  18
  -5   5   6-20.2566 19.5783  28
  -5   5   5-13.5346 22.1171  18
  -5   5   4 191.422 36.8319  18
   5   5  -3 167.936 35.3960  19
  -5   5   3 208.438 36.6115  18
   5   5  -2 272.407 44.7143  19
  -5   5   2 237.389 37.7888  18
   5  -5  -1 26.6802 23.7081  22
   5   5  -1 52.1402 29.8634  19
   5  -5   0 600.843 56.0482  22
   5   5   0 543.569 62.6193  19
  -5   5   0 606.333 55.8771  24
  -5   5  -1 22.3099 22.5012  24
   5  -5   1 29.8267 23.4830  22
   5   5   1 9.51415 31.0928  19
   5   5   1-18.6216 29.3214  27
  -5   5  -2 181.154 34.3705  24
   5  -5   2 151.385 33.3218  22
   5   5   2 210.575 43.4650  19
   5   5   2 164.171 39.7347  27
  -5   5  -3 115.350 30.3166  24
   5  -5   3 116.285 29.3909  22
   5   5   3 140.771 37.6008  19
   5   5   3 143.131 35.3680  27
   5   5   4 2407.36 116.774  27
  -5   5  -4 2313.82 108.066  24
  -5   5  -5 168.053 31.5349  24
  -5   5  -6 16.9408 18.6758  24
  -5   5  -7 766.122 51.1036  24
  -5   5  -8 343.953 30.5924  24
  -5   6   6 21.7124 13.5407  18
  -5   6   5 10.8197 15.1215  18
  -5   6   4-19.1343 18.0555  18
  -5   6   3 104.669 23.0054  18
   5   6  -2 136.435 31.9705  19
  -5   6   1 95.0144 26.3964  24
   5   6  -1 181.691 35.0198  19
  -5   6   0 70.0269 22.9868  24
   5   6   0 49.4884 26.7097  19
   5   6   1 724.807 59.8000  19
  -5   6  -1 749.915 54.2443  24
  -5   6  -2 265.632 34.9345  24
   5   6   2 253.067 38.6858  19
  -5   6  -3 46.6079 19.5590  24
   5   6   3 30.1765 20.4318  19
  -5   6  -4 42.4904 20.4992  24
  -5   6  -5 182.274 25.0012  24
  -5   6  -6 514.787 32.1550  20
  -5   6  -6 477.951 34.3413  24
   6   0 -10 100.710 20.1739   6
   6   0  -9-27.1136 20.5070   6
   6   0  -8 16.1732 19.9815  21
   6   0  -8 27.0179 22.8617   6
   6   0  -7 9.59671 21.6425  21
   6   0  -6 4840.67 173.448  21
  -6   0   4 1767.20 101.825  18
   6   0  -3-5.39236 29.2861  19
   6   0  -2 1506.50 106.846  19
   6   0  -2 1572.23 110.869  25
   6   0  -1 21.8393 30.6600  19
   6   0  -1 11.1724 34.7308  25
   6   0  -1 18.4818 29.1027   5
   6   0   0 14609.2 425.854  19
   6   0   0 14932.9 416.486   5
   6   0   0 14276.0 427.731  25
   6   0   1-4.62828 28.0065   5
   6   0   1-10.6576 34.4117  25
   6   0   2 18803.5 502.555   5
   6   0   3-9.04311 28.8409   5
   6   0   4 562.137 59.9608   5
   6   0   5-4.19176 25.0100   5
   6   0   6 15.5532 28.8182   5
   6   0   7 17.4205 26.2972   5
   6   0   8 1263.68 72.0659   5
   6   0   9 7.15702 15.9602   5
   6   0  10 35.5470 14.7046   5
   6  -1 -10 23.3278 13.5188  21
   6   1 -10 55.4584 16.9331   6
   6  -1 -10 49.8373 16.0921   6
   6   1  -9 436.985 38.2749   6
   6  -1  -9 489.847 40.7350   6
   6  -1  -9 536.880 41.2237  21
   6  -1  -8 140.606 27.7669  21
   6   1  -8 105.852 26.7803   6
   6  -1  -8 125.506 27.2654   6
   6  -1  -7 332.184 42.0260  21
   6  -1  -6 2232.72 108.665  21
   6  -1  -5 847.277 68.1643  21
   6   1  -5 874.792 75.6526  19
  -6   1   5 918.392 69.4678  18
   6   1  -4 1217.70 90.6910  19
  -6   1   4 1113.28 79.8215  18
   6   1  -4 1034.66 86.3516  25
   6   1  -3 732.039 73.6325  19
  -6   1   3 865.878 72.7593  18
   6   1  -3 843.829 78.1080  25
   6   1  -2 276.803 51.5190  19
  -6   1   2 178.517 38.8500  18
   6   1  -2 165.041 43.1803  25
   6   1  -1 859.879 80.4453  19
  -6   1   1 975.581 76.6721  18
   6   1  -1 982.036 77.9733   5
   6  -1  -1 1025.01 78.8144   5
   6   1  -1 949.756 86.0998  25
   6   1   0 3735.87 171.351  19
   6   1   0 3838.49 161.273   5
   6  -1   0 3875.52 163.364   5
   6   1   0 3716.04 172.514  25
   6   1   1 1030.76 83.5079  19
   6   1   1 869.457 71.6475   5
   6  -1   1 956.964 77.1743   5
   6   1   1 789.916 76.3710  25
   6   1   2 167.036 38.0157   5
   6  -1   2 126.226 37.6315   5
   6   1   2 169.480 43.1466  25
   6   1   3 668.548 64.8918   5
   6  -1   3 787.939 68.2775   5
   6   1   4 713.346 63.9682   5
   6  -1   4 724.448 65.9174   5
   6   1   5 118.637 31.7269   5
   6  -1   5 81.2853 31.8208   5
   6   1   6 171.144 35.9760   5
   6  -1   6 169.280 36.9597   5
   6   1   7 1237.42 72.5879   5
   6  -1   7 1008.28 68.4282   5
   6   1   8 51.8695 21.5228   5
   6  -1   8 34.0950 21.8418   5
   6   1   9 99.6843 21.3889   5
   6  -1   9 100.660 21.9754   5
   6  -2  -9 82.9858 20.3868  21
   6  -2  -8 20.5811 19.2465  21
   6  -2  -7 549.534 49.3298  21
   6  -2  -6 30.6203 26.3557  21
  -6   2   6-10.2464 22.3233  18
   6  -2  -5 84.5839 31.5423  21
  -6   2   5 115.228 31.5411  18
   6  -2  -4 212.345 38.4244  21
   6   2  -4 198.495 40.4222  19
  -6   2   4 251.934 41.4876  18
   6   2  -4 200.294 43.8046  25
   6   2  -3 262.093 46.8640  19
  -6   2   3 241.077 43.0604  18
   6   2  -3 215.934 44.7300  25
   6   2  -2 453.936 57.9404  19
  -6   2   2 455.060 53.2489  18
   6   2  -2 425.347 59.4934  25
   6   2  -1 290.139 51.6214  19
  -6   2   1 448.414 52.7153  18
   6   2  -1 364.607 55.4314  25
   6  -2   0 2477.76 117.165  22
   6   2   0 2294.35 126.741  19
  -6   2   0 2098.01 111.671  18
   6   2   0 2189.17 126.899  25
   6  -2   1-4.14294 27.0788   5
   6  -2   1 24.4247 25.3085  22
   6   2   1 15.2071 31.0970  19
   6   2   1 5.25953 30.0065  25
   6  -2   2 106.312 33.0760   5
   6  -2   2 97.3269 31.7691  22
   6   2   2 146.314 41.0921  25
   6  -2   3-3.98678 25.1095   5
   6  -2   3-3.98723 23.4474  22
   6  -2   4 11.4630 23.1221   5
   6  -2   4 7.70186 22.3111  22
   6  -2   5 1218.03 76.5488  22
   6  -2   5 1176.74 74.7755   5
   6  -2   6 1611.63 85.5242  22
   6  -2   6 1567.66 83.5929   5
   6  -2   7 932.795 60.9952  22
   6  -2   8-4.84954 14.6728  22
   6  -2   9 1.84931 11.6473  22
   6  -3  -8 266.707 28.4641  21
   6  -3  -7 116.215 24.3326  21
  -6   3   7 147.702 25.5921  18
   6  -3  -6-8.34924 18.1924  21
  -6   3   6-18.0356 20.7852  18
   6  -3  -5 198.450 33.6523  21
  -6   3   5 263.410 37.7856  18
   6   3  -4 78.3931 30.9040  19
  -6   3   4 77.9783 30.0049  18
   6   3  -3 360.953 49.5117  19
  -6   3   3 322.613 43.1604  18
   6   3  -3 314.144 48.3674  25
   6  -3  -2 22.7150 22.9084  22
   6   3  -2 9.50490 26.2518  19
  -6   3   2-19.7479 25.8141  18
   6   3  -2-14.1956 27.4139  25
   6  -3  -1 314.502 43.3775  22
   6   3  -1 238.193 45.6563  19
  -6   3   1 312.134 43.0481  18
   6   3  -1 362.857 53.6506  25
   6  -3   0 86.1793 29.0827  22
   6   3   0 87.2506 35.2943  19
   6   3   0 69.3371 35.7123  25
   6  -3   1 70.2640 27.5792  22
   6   3   1 61.2370 32.2390  19
   6   3   1 19.5109 30.7402  25
   6  -3   2 219.129 36.6852  22
   6   3   2 240.113 43.2793  19
   6   3   2 219.950 44.2822  25
   6  -3   3 632.678 57.2483  22
   6   3   3 569.688 60.2193  25
   6  -3   4 1781.67 93.1927  22
   6  -3   5 12.9983 19.9365  22
   6  -3   6 268.707 34.4584  22
  -6   3  -7-4.46389 15.4332  24
   6  -3   7 31.8169 17.8004  22
  -6   3  -8 24.9777 14.0549  24
   6  -3   8-1.92251 13.0083  22
  -6   4   7 21.3514 14.0178  18
  -6   4   7 5.59146 13.5575  28
  -6   4   6 141.219 24.4485  18
  -6   4   5 303.668 35.7121  18
  -6   4   4 1106.71 68.1780  18
   6   4  -3 101.788 30.9778  19
  -6   4   3 113.566 27.4646  18
   6   4  -2 239.970 39.7157  19
  -6   4   2 169.478 33.0189  18
   6   4  -2 222.857 39.3788  25
   6  -4  -1 90.5486 26.7131  22
   6   4  -1 114.560 32.8174  19
   6   4  -1 93.6580 31.8791  25
   6  -4   0 372.020 43.4413  22
   6   4   0 455.758 52.4140  19
   6   4   0 387.166 50.0491  25
   6  -4   1 43.4237 22.3793  22
   6   4   1 79.8401 30.1528  19
   6   4   1 61.7998 29.6985  25
   6  -4   2 25.8342 20.5983  22
   6   4   2-11.2242 25.0296  19
   6  -4   3-12.2152 18.9882  22
   6   4   3-21.7446 25.3245  25
   6  -4   4 910.744 59.1006  22
   6  -4   5 69.7346 20.1483  22
   6  -4   6 307.607 30.7166  22
  -6   4  -6 284.481 29.1979  24
   6  -4   7 874.620 45.1768  22
  -6   4  -7 876.040 44.8759  24
  -6   5   5 21.9721 12.5345  18
  -6   5   4 125.069 21.9302  18
   6   5  -3 9.53395 16.4823  19
  -6   5   3 18.8055 15.1989  18
   6   5  -2 49.3523 22.1459  19
   6   5  -1 8.81898 21.3791  19
   6   5  -1 5.67803 19.2074  25
   6   5   0 266.402 36.2949  19
   6   5   0 347.999 40.0895  25
   6   5   1 298.837 37.7130  19
   6   5   1 391.405 41.4216  25
   6  -5   2 495.584 39.7862  22
   6   5   2 460.151 42.9165  19
   6   5   2 523.717 45.9245  25
   6  -5   3 96.2531 19.5815  22
   6   5   3 65.5778 21.6551  25
   6  -5   4 114.866 18.7482  22
   6   5   4 155.126 23.3934  25
   7   0  -7 134.680 19.5540   6
   7   0  -6 9.15818 13.5757  21
   7   0  -5 188.288 26.1814  21
   7   0  -4 2.56440 18.1039  21
  -7   0   4 7.95093 17.3225  18
  -7   0   3 41.4647 20.4966  18
  -7   0   2-3.15588 19.6198  18
  -7   0   1 492.333 47.2544  18
  -7   0   0-3.20745 20.2011  18
  -7   0  -1 238.966 34.3647  18
  -7   0  -2 19.6198 18.5391  18
   7   0   2 12.3613 19.7143   5
   7   0   3 305.523 36.0476   5
   7   0   4 2.65748 16.9505   5
   7   0   5 35.0109 18.2486   5
   7   0   6 15.4775 15.9743   5
   7  -1  -6 33.8747 15.4424  21
   7   1  -6 47.4481 17.2040   6
   7  -1  -5 92.3327 21.8648  21
  -7   1   5 84.4435 20.5032  18
   7  -1  -4 1477.13 74.8692  21
  -7   1   4 1603.54 76.9879  18
   7  -1  -3 77.0935 25.0349  21
  -7   1   3 60.6337 23.1599  18
  -7  -1   3 72.4397 23.0473  18
  -7   1   2 818.920 58.2242  18
  -7  -1   2 731.806 55.4871  18
  -7   1   1 839.655 59.3857  18
  -7   1   0 1542.91 81.0814  18
  -7   1  -1 206.767 31.0782  18
   7   1   2 1740.18 84.5395   5
   7  -1   2 1780.38 86.4432   5
   7   1   3 5.31879 18.5818   5
   7  -1   3 2.77164 18.5417   5
   7   1   4 800.784 51.9373   5
   7  -1   4 773.532 52.4092   5
   7   1   5 53.9382 18.0157   5
   7  -1   5 24.1343 16.4295   5
   7  -1   6 82.3526 17.8561   5
   7   1   6 71.3362 16.5579   5
   7  -2  -6 689.904 40.0145  21
   7  -2  -5 152.267 23.1151  21
  -7   2   5 161.191 23.4420  18
   7  -2  -4 114.769 22.9244  21
  -7   2   4 109.336 22.8705  18
   7  -2  -3 223.346 29.3414  21
  -7   2   3 241.093 30.8754  18
  -7  -2   3 218.812 28.2890  18
   7  -2  -2 46.6961 21.7803  21
   7   2  -2 55.0414 25.7367  19
  -7   2   2 61.8379 22.5528  18
   7   2  -1 1653.74 87.1994  19
  -7   2   1 1525.17 77.0920  18
   7   2  -1 1512.85 85.7867  25
   7   2   0 2424.31 108.143  19
  -7   2   0 2336.45 97.6852  18
   7   2   0 2496.25 111.521  25
   7   2   1 2240.65 102.027  19
   7   2   1 2421.97 107.008  25
   7   2   2 1191.37 70.0807  25
  -7   3   4 8.83599 12.3491  18
   7   3  -3 18.4079 17.5199  19
  -7   3   3-11.8448 13.3556  18
   7   3  -2 5.13659 17.5676  19
  -7   3   2 6.18046 13.9379  18
   7   3  -2 2.52280 18.3473  25
   7   3  -1 214.745 30.7819  19
  -7   3   1 234.506 26.8783  18
   7   3  -1 243.776 32.4634  25
   7   3   0 21.2501 19.1340  19
   7   3   0 10.9917 19.0023  25
   7  -3   1 71.9280 18.2148  22
   7   3   1 84.3464 22.1616  19
   7   3   1 89.8709 24.1995  25
   7  -3   2 111.153 19.9872  22
   7   3   2 155.329 26.8638  25
   7  -3   3 1.75672 11.7520  22
   7  -3   4 145.392 18.7746  22
   0   0   0    0.00    0.00   0

TITL UrAc_213K in P2(1)/n
REM P2(1)/n (#14 in standard setting)
CELL 1.54184   6.218155   7.352971  13.123154  90.0000  90.5186  90.0000
ZERR    4.00   0.000370   0.000500   0.000847   0.0000   0.0061   0.0000
LATT  1
SYMM -x+1/2, y+1/2,-z+1/2
SFAC C H N O
UNIT 20.00 16.00 16.00 12.00
TREF
HKLF 4
END
;
_shelx_hkl_checksum                68318
_olex2_submission_special_instructions  'No special instructions were received'
_oxdiff_exptl_absorpt_empirical_details
;
Empirical correction (ABSPACK) includes:
- Absorption correction using spherical harmonics
- Frame scaling
;
_oxdiff_exptl_absorpt_empirical_full_max  1.180
_oxdiff_exptl_absorpt_empirical_full_min  0.847
loop_
  _twin_individual_id
  _twin_individual_mass_fraction_refined
 1 0.941(2)
 2 0.059(2)
