# Supplementary material
Source: MDPI journal article supplement (https://www.mdpi.com/2075-163X/9/6/373)
Supplement: s1 [file s1 › UA_-100_last.cif]

data_UA_-100_urac_173k
_audit_creation_date               2019-04-29
_audit_creation_method
;
Olex2 1.2
(compiled 2018.05.29 svn.r3508 for OlexSys, GUI svn.r5506)
;
_shelx_SHELXL_version_number       '2018/3'
_audit_contact_author_address      ?
_audit_contact_author_email        ?
_audit_contact_author_name         ''
_audit_contact_author_phone        ?
_publ_contact_author_id_orcid      ?
_publ_section_references
;
Dolomanov, O.V., Bourhis, L.J., Gildea, R.J, Howard, J.A.K. & Puschmann, H.
 (2009), J. Appl. Cryst. 42, 339-341.

Sheldrick, G.M. (2015). Acta Cryst. C71, 3-8.
;
_chemical_name_common              ?
_chemical_name_systematic          ?
_chemical_formula_moiety           'C5 H4 N4 O3'
_chemical_formula_sum              'C5 H4 N4 O3'
_chemical_formula_weight           168.12
_chemical_melting_point            ?
_chemical_oxdiff_formula           'C5 H4 N4 O3'
loop_
  _atom_type_symbol
  _atom_type_description
  _atom_type_scat_dispersion_real
  _atom_type_scat_dispersion_imag
  _atom_type_scat_source
 'C' 'C' 0.0181 0.0091 'International Tables Vol C Tables 4.2.6.8 and 6.1.1.4'
 'H' 'H' 0.0000 0.0000 'International Tables Vol C Tables 4.2.6.8 and 6.1.1.4'
 'N' 'N' 0.0311 0.0180 'International Tables Vol C Tables 4.2.6.8 and 6.1.1.4'
 'O' 'O' 0.0492 0.0322 'International Tables Vol C Tables 4.2.6.8 and 6.1.1.4'

_shelx_space_group_comment
;
The symmetry employed for this shelxl refinement is uniquely defined
by the following loop, which should always be used as a source of
symmetry information in preference to the above space-group names.
They are only intended as comments.
;
_space_group_crystal_system        'monoclinic'
_space_group_IT_number             14
_space_group_name_H-M_alt          'P 1 21/n 1'
_space_group_name_Hall             '-P 2yn'
loop_
  _space_group_symop_operation_xyz
 'x, y, z'
 '-x+1/2, y+1/2, -z+1/2'
 '-x, -y, -z'
 'x-1/2, -y-1/2, z-1/2'

_cell_length_a                     6.2288(4)
_cell_length_b                     7.3113(5)
_cell_length_c                     13.1274(8)
_cell_angle_alpha                  90
_cell_angle_beta                   90.632(6)
_cell_angle_gamma                  90
_cell_volume                       597.79(7)
_cell_formula_units_Z              4
_cell_measurement_reflns_used      1231
_cell_measurement_temperature      173(2)
_cell_measurement_theta_max        72.5440
_cell_measurement_theta_min        6.7080
_shelx_estimated_absorpt_T_max     ?
_shelx_estimated_absorpt_T_min     ?
_exptl_absorpt_coefficient_mu      1.376
_exptl_absorpt_correction_T_max    1.00000
_exptl_absorpt_correction_T_min    0.91984
_exptl_absorpt_correction_type     multi-scan
_exptl_absorpt_process_details
;
CrysAlisPro 1.171.39.44a (Rigaku Oxford Diffraction, 2018)
Empirical absorption correction using spherical harmonics,
 implemented in SCALE3 ABSPACK scaling algorithm.
;
_exptl_absorpt_special_details     ?
_exptl_crystal_colour              'translucent light-yellow'
_exptl_crystal_density_diffrn      1.868
_exptl_crystal_density_meas        ?
_exptl_crystal_density_method      ?
_exptl_crystal_description         'prism'
_exptl_crystal_F_000               344
_exptl_crystal_size_max            0.075
_exptl_crystal_size_mid            0.07
_exptl_crystal_size_min            0.027
_exptl_transmission_factor_max     ?
_exptl_transmission_factor_min     ?
_diffrn_reflns_av_R_equivalents    0.0231
_diffrn_reflns_av_unetI/netI       0.0342
_diffrn_reflns_Laue_measured_fraction_full  0.987
_diffrn_reflns_Laue_measured_fraction_max  0.988
_diffrn_reflns_limit_h_max         7
_diffrn_reflns_limit_h_min         -7
_diffrn_reflns_limit_k_max         8
_diffrn_reflns_limit_k_min         -6
_diffrn_reflns_limit_l_max         15
_diffrn_reflns_limit_l_min         -16
_diffrn_reflns_number              2552
_diffrn_reflns_point_group_measured_fraction_full  0.987
_diffrn_reflns_point_group_measured_fraction_max  0.988
_diffrn_reflns_theta_full          67.684
_diffrn_reflns_theta_max           69.997
_diffrn_reflns_theta_min           3.367
_diffrn_ambient_environment        N~2~
_diffrn_ambient_temperature        173(2)
_diffrn_detector                   'CCD plate'
_diffrn_detector_area_resol_mean   ?
_diffrn_detector_type              HyPix3000
_diffrn_measured_fraction_theta_full  0.987
_diffrn_measured_fraction_theta_max  0.988
_diffrn_measurement_details
;
List of Runs (angles in degrees, time in seconds):

  # Type    Start    End  Width  t~exp~   \w     \q     \k     \f   Frames
--------------------------------------------------------------------------
  1  \w   -100.00 -73.00   0.50    1.00    --  -38.95 -55.00 -24.00   54
  2  \w    -54.00 -16.00   0.50    1.00    --  -38.95  55.00 119.00   76
  3  \w    -65.00 -30.00   0.50    1.00    --  -38.95 -55.00 -24.00   70
  4  \w     24.00  54.00   0.50    1.00    --   38.95  55.00 119.00   60
  5  \w     89.00 153.00   0.50    2.50    --  107.00  55.00 119.00  128
  6  \w     45.00 127.00   0.50    2.50    --  107.00 -55.00 -24.00  164
  7  \w    -62.00   4.00   0.50    1.00    --  -38.95  77.00-150.00  132
  8  \w    -52.00 -14.00   0.50    1.00    --  -38.95  43.00 150.00   76
  9  \w   -102.00 -42.00   0.50    1.00    --  -38.95 -65.00 -60.00  120
 10  \w    -10.00  21.00   0.50    1.00    --  -38.95  43.00 150.00   62
 11  \w     68.00 106.00   0.50    1.00    --   38.95  21.00  90.00   76
 12  \w    -18.00  11.00   0.50    1.00    --   38.95 -32.00 -30.00   58
 13  \w     29.00  63.00   0.50    1.00    --   38.95  21.00  90.00   68
 14  \w    -26.00   0.00   0.50    1.00    --   38.95 -55.00 -24.00   52
 15  \w     16.00  48.00   0.50    1.00    --   38.95 -32.00 -30.00   64
 16  \w    -21.00  21.00   0.50    1.00    --   38.95 -32.00 150.00   84
 17  \w     34.00  63.00   0.50    1.00    --   38.95  43.00 -90.00   58
 18  \w     89.00 155.00   0.50    2.50    --  107.00  45.00   0.00  132
 19  \w     78.00 129.00   0.50    2.50    --  107.00 -61.00-150.00  102
 20  \w     68.00 114.00   0.50    2.50    --  107.00-133.00-150.00   92
 21  \w     41.00 120.00   0.50    2.50    --  107.00 -30.00 -60.00  158
 22  \w     93.00 127.00   0.50    2.50    --  107.00  30.00-180.00   68
 23  \w     99.00 153.00   0.50    2.50    --  107.00  45.00  90.00  108
 24  \w     55.00 122.00   0.50    2.50    --  107.00 -37.00  90.00  134
 25  \w     97.00 122.00   0.50    2.50    --  107.00 -53.00-150.00   50
 26  \w     99.00 125.00   0.50    2.50    --  107.00-133.00 -60.00   52
 27  \w     59.00  84.00   0.50    2.50    --  107.00 -53.00-150.00   50
 28  \w    120.00 155.00   0.50    2.50    --  107.00  30.00  30.00   70
 29  \w     44.00  92.00   0.50    2.50    --  107.00-133.00 -60.00   96
 30  \w    107.00 142.00   0.50    2.50    --  107.00  15.00  90.00   70
 31  \w     72.00 115.00   0.50    2.50    --  107.00 -37.00 150.00   86
;
_diffrn_measurement_device         'four-circle diffractometer'
_diffrn_measurement_device_type   
 'SuperNova, Single source at offset/far, HyPix3000'
_diffrn_measurement_method         '\w scans'
_diffrn_orient_matrix_type        
 'CrysAlisPro convention (1999,Acta A55,543-557)'
_diffrn_orient_matrix_UB_11        0.2159253000
_diffrn_orient_matrix_UB_12        -0.0975996000
_diffrn_orient_matrix_UB_13        -0.0166718000
_diffrn_orient_matrix_UB_21        -0.0963880000
_diffrn_orient_matrix_UB_22        -0.1002146000
_diffrn_orient_matrix_UB_23        -0.0930615000
_diffrn_orient_matrix_UB_31        0.0725228000
_diffrn_orient_matrix_UB_32        0.1574542000
_diffrn_orient_matrix_UB_33        -0.0696323000
_diffrn_radiation_monochromator    mirror
_diffrn_radiation_probe            x-ray
_diffrn_radiation_type             CuK\a
_diffrn_radiation_wavelength       1.54184
_diffrn_source                     'micro-focus sealed X-ray tube'
_diffrn_source_type                'SuperNova (Cu) X-ray Source'
_reflns_Friedel_coverage           0.000
_reflns_Friedel_fraction_full      .
_reflns_Friedel_fraction_max       .
_reflns_number_gt                  991
_reflns_number_total               1121
_reflns_odcompleteness_completeness  98.60
_reflns_odcompleteness_iscentric   1
_reflns_odcompleteness_theta       72.42
_reflns_special_details
;
 Reflections were merged by SHELXL according to the crystal
 class for the calculation of statistics and refinement.
 
 _reflns_Friedel_fraction is defined as the number of unique
 Friedel pairs measured divided by the number that would be
 possible theoretically, ignoring centric projections and
 systematic absences. Completness statistics refer to single and
 composite reflections containing twin component 1 only.
;
_reflns_threshold_expression       'I > 2\s(I)'
_computing_cell_refinement         'CrysAlisPro 1.171.39.44a (Rigaku OD, 2018)'
_computing_data_collection         'CrysAlisPro 1.171.39.44a (Rigaku OD, 2018)'
_computing_data_reduction          'CrysAlisPro 1.171.39.44a (Rigaku OD, 2018)'
_computing_molecular_graphics      'Olex2 (Dolomanov et al., 2009)'
_computing_publication_material    'Olex2 (Dolomanov et al., 2009)'
_computing_structure_solution      'ShelXT (Sheldrick, 2015)'
_refine_diff_density_max           0.428
_refine_diff_density_min           -0.238
_refine_diff_density_rms           0.072
_refine_ls_extinction_coef         0.0018(2)
_refine_ls_extinction_expression  
 'Fc^*^=kFc[1+0.001xFc^2^\l^3^/sin(2\q)]^-1/4^'
_refine_ls_extinction_method       'SHELXL-2018/3 (Sheldrick 2018)'
_refine_ls_goodness_of_fit_ref     1.111
_refine_ls_hydrogen_treatment      constr
_refine_ls_matrix_type             full
_refine_ls_number_parameters       111
_refine_ls_number_reflns           1121
_refine_ls_number_restraints       0
_refine_ls_R_factor_all            0.0616
_refine_ls_R_factor_gt             0.0556
_refine_ls_restrained_S_all        1.111
_refine_ls_shift/su_max            0.000
_refine_ls_shift/su_mean           0.000
_refine_ls_structure_factor_coef   Fsqd
_refine_ls_weighting_details      
 'w=1/[\s^2^(Fo^2^)+(0.0938P)^2^+0.6375P] where P=(Fo^2^+2Fc^2^)/3'
_refine_ls_weighting_scheme        calc
_refine_ls_wR_factor_gt            0.1679
_refine_ls_wR_factor_ref           0.1751
_refine_special_details
;
 Refined as a 2-component twin.
;
_olex2_refinement_description
;
1. Twinned data refinement
 Scales: 0.9609(19)
 0.0391(19)
2. Fixed Uiso
 At 1.2 times of:
  All N(H) groups
3.a Aromatic/amide H refined with riding coordinates:
 N1(H1), N2(H2), N3(H3), N4(H4)
;
_atom_sites_solution_hydrogens     geom
_atom_sites_solution_primary       ?
_atom_sites_solution_secondary     ?
loop_
  _atom_site_label
  _atom_site_type_symbol
  _atom_site_fract_x
  _atom_site_fract_y
  _atom_site_fract_z
  _atom_site_U_iso_or_equiv
  _atom_site_adp_type
  _atom_site_occupancy
  _atom_site_site_symmetry_order
  _atom_site_calc_flag
  _atom_site_refinement_flags_posn
  _atom_site_refinement_flags_adp
  _atom_site_refinement_flags_occupancy
  _atom_site_disorder_assembly
  _atom_site_disorder_group
 O1 O 0.9256(4) 0.4840(3) 0.36773(18) 0.0378(7) Uani 1 1 d . . . . .
 O2 O 0.5819(4) 0.7693(3) 0.63006(17) 0.0350(6) Uani 1 1 d . . . . .
 O3 O -0.0301(4) 0.9668(3) 0.35956(17) 0.0332(6) Uani 1 1 d . . . . .
 N1 N 0.7540(4) 0.6360(4) 0.4947(2) 0.0302(7) Uani 1 1 d . . . . .
 H1 H 0.858671 0.608133 0.535045 0.036 Uiso 1 1 calc R . . . .
 N2 N 0.6147(4) 0.6340(4) 0.3288(2) 0.0310(7) Uani 1 1 d . . . . .
 H2 H 0.620107 0.605271 0.265385 0.037 Uiso 1 1 calc R . . . .
 N3 N 0.2350(4) 0.8757(4) 0.4748(2) 0.0294(6) Uani 1 1 d . . . . .
 H3 H 0.183154 0.917291 0.530697 0.035 Uiso 1 1 calc R . . . .
 N4 N 0.2738(4) 0.7993(4) 0.3135(2) 0.0288(7) Uani 1 1 d . . . . .
 H4 H 0.249162 0.785928 0.249293 0.035 Uiso 1 1 calc R . . . .
 C1 C 0.7738(5) 0.5786(5) 0.3956(3) 0.0315(7) Uani 1 1 d . . . . .
 C2 C 0.4486(5) 0.7353(4) 0.3651(2) 0.0281(7) Uani 1 1 d . . . . .
 C3 C 0.4277(5) 0.7832(4) 0.4648(2) 0.0288(7) Uani 1 1 d . . . . .
 C4 C 0.5861(5) 0.7336(4) 0.5384(2) 0.0291(7) Uani 1 1 d . . . . .
 C5 C 0.1425(5) 0.8893(4) 0.3811(2) 0.0298(7) Uani 1 1 d . . . . .

loop_
  _atom_site_aniso_label
  _atom_site_aniso_U_11
  _atom_site_aniso_U_22
  _atom_site_aniso_U_33
  _atom_site_aniso_U_23
  _atom_site_aniso_U_13
  _atom_site_aniso_U_12
 O1 0.0347(13) 0.0468(14) 0.0317(13) 0.0004(10) -0.0049(10) 0.0069(10)
 O2 0.0398(13) 0.0426(13) 0.0224(12) 0.0023(9) -0.0054(10) -0.0004(10)
 O3 0.0312(12) 0.0416(13) 0.0265(11) -0.0001(9) -0.0042(9) 0.0048(10)
 N1 0.0291(13) 0.0331(14) 0.0284(14) 0.0033(11) -0.0068(11) 0.0010(11)
 N2 0.0326(14) 0.0354(14) 0.0249(13) 0.0004(11) -0.0059(11) 0.0006(11)
 N3 0.0297(13) 0.0350(15) 0.0233(13) -0.0015(10) -0.0005(10) 0.0011(11)
 N4 0.0315(14) 0.0328(14) 0.0220(12) -0.0001(10) -0.0041(10) 0.0004(11)
 C1 0.0293(15) 0.0319(16) 0.0331(16) 0.0031(13) -0.0062(13) -0.0027(13)
 C2 0.0289(15) 0.0286(15) 0.0268(16) 0.0004(12) -0.0046(12) -0.0026(12)
 C3 0.0295(15) 0.0318(16) 0.0249(15) -0.0002(12) -0.0037(12) -0.0011(12)
 C4 0.0314(16) 0.0284(15) 0.0273(16) 0.0021(12) -0.0040(13) -0.0050(12)
 C5 0.0310(15) 0.0323(17) 0.0260(15) 0.0004(12) -0.0029(12) -0.0033(13)

_geom_special_details
;
 All esds (except the esd in the dihedral angle between two l.s. planes)
 are estimated using the full covariance matrix.  The cell esds are taken
 into account individually in the estimation of esds in distances, angles
 and torsion angles; correlations between esds in cell parameters are only
 used when they are defined by crystal symmetry.  An approximate (isotropic)
 treatment of cell esds is used for estimating esds involving l.s. planes.
;
loop_
  _geom_bond_atom_site_label_1
  _geom_bond_atom_site_label_2
  _geom_bond_distance
  _geom_bond_site_symmetry_2
  _geom_bond_publ_flag
 O1 C1 1.231(4) . ?
 O2 C4 1.232(4) . ?
 O3 C5 1.246(4) . ?
 N1 H1 0.8600 . ?
 N1 C1 1.374(4) . ?
 N1 C4 1.394(4) . ?
 N2 H2 0.8600 . ?
 N2 C1 1.376(4) . ?
 N2 C2 1.363(4) . ?
 N3 H3 0.8600 . ?
 N3 C3 1.385(4) . ?
 N3 C5 1.356(4) . ?
 N4 H4 0.8600 . ?
 N4 C2 1.359(4) . ?
 N4 C5 1.381(4) . ?
 C2 C3 1.363(5) . ?
 C3 C4 1.420(5) . ?

loop_
  _geom_angle_atom_site_label_1
  _geom_angle_atom_site_label_2
  _geom_angle_atom_site_label_3
  _geom_angle
  _geom_angle_site_symmetry_1
  _geom_angle_site_symmetry_3
  _geom_angle_publ_flag
 C1 N1 H1 115.8 . . ?
 C1 N1 C4 128.4(3) . . ?
 C4 N1 H1 115.8 . . ?
 C1 N2 H2 120.6 . . ?
 C2 N2 H2 120.6 . . ?
 C2 N2 C1 118.8(3) . . ?
 C3 N3 H3 126.0 . . ?
 C5 N3 H3 126.0 . . ?
 C5 N3 C3 108.0(3) . . ?
 C2 N4 H4 125.7 . . ?
 C2 N4 C5 108.6(3) . . ?
 C5 N4 H4 125.7 . . ?
 O1 C1 N1 122.0(3) . . ?
 O1 C1 N2 121.8(3) . . ?
 N1 C1 N2 116.2(3) . . ?
 N2 C2 C3 123.8(3) . . ?
 N4 C2 N2 128.3(3) . . ?
 N4 C2 C3 107.9(3) . . ?
 N3 C3 C4 131.0(3) . . ?
 C2 C3 N3 108.0(3) . . ?
 C2 C3 C4 121.0(3) . . ?
 O2 C4 N1 122.3(3) . . ?
 O2 C4 C3 126.0(3) . . ?
 N1 C4 C3 111.7(3) . . ?
 O3 C5 N3 126.6(3) . . ?
 O3 C5 N4 125.9(3) . . ?
 N3 C5 N4 107.5(3) . . ?

loop_
  _geom_hbond_atom_site_label_D
  _geom_hbond_atom_site_label_H
  _geom_hbond_atom_site_label_A
  _geom_hbond_distance_DH
  _geom_hbond_distance_HA
  _geom_hbond_distance_DA
  _geom_hbond_angle_DHA
  _geom_hbond_site_symmetry_A
  _geom_hbond_publ_flag
 N1 H1 O1 0.86 1.96 2.817(3) 172.3 3_766 yes
 N2 H2 O3 0.86 2.00 2.803(4) 154.6 2_545 yes
 N3 H3 O3 0.86 1.93 2.782(3) 169.7 3_576 yes
 N4 H4 O2 0.86 1.91 2.723(3) 156.2 4_575 yes


loop_
  _geom_torsion_atom_site_label_1
  _geom_torsion_atom_site_label_2
  _geom_torsion_atom_site_label_3
  _geom_torsion_atom_site_label_4
  _geom_torsion
  _geom_torsion_site_symmetry_1
  _geom_torsion_site_symmetry_2
  _geom_torsion_site_symmetry_3
  _geom_torsion_site_symmetry_4
  _geom_torsion_publ_flag
 N2 C2 C3 N3 -176.5(3) . . . . ?
 N2 C2 C3 C4 2.0(5) . . . . ?
 N3 C3 C4 O2 -1.5(6) . . . . ?
 N3 C3 C4 N1 178.4(3) . . . . ?
 N4 C2 C3 N3 1.0(4) . . . . ?
 N4 C2 C3 C4 179.5(3) . . . . ?
 C1 N1 C4 O2 176.2(3) . . . . ?
 C1 N1 C4 C3 -3.7(5) . . . . ?
 C1 N2 C2 N4 -178.1(3) . . . . ?
 C1 N2 C2 C3 -1.2(5) . . . . ?
 C2 N2 C1 O1 178.5(3) . . . . ?
 C2 N2 C1 N1 -1.9(4) . . . . ?
 C2 N4 C5 O3 179.0(3) . . . . ?
 C2 N4 C5 N3 -1.6(3) . . . . ?
 C2 C3 C4 O2 -179.6(3) . . . . ?
 C2 C3 C4 N1 0.3(4) . . . . ?
 C3 N3 C5 O3 -178.4(3) . . . . ?
 C3 N3 C5 N4 2.2(3) . . . . ?
 C4 N1 C1 O1 -175.8(3) . . . . ?
 C4 N1 C1 N2 4.6(5) . . . . ?
 C5 N3 C3 C2 -2.0(4) . . . . ?
 C5 N3 C3 C4 179.7(3) . . . . ?
 C5 N4 C2 N2 177.7(3) . . . . ?
 C5 N4 C2 C3 0.4(4) . . . . ?

_shelx_res_file
;
TITL urac_173k_a.res in P2(1)/n
    urac_173k.res
    created by SHELXL-2018/3 at 22:41:36 on 29-Apr-2019
REM Old TITL UrAc_173K in P2(1)/n
REM SHELXT solution in P2(1)/n: R1 0.156, Rweak 0.046, Alpha 0.075
REM <I/s> 0.362 for 103 systematic absences, Orientation as input
REM Formula found by SHELXT: C9 O3
CELL 1.54184 6.2288 7.3113 13.1274 90 90.632 90
ZERR 4 0.0004 0.0005 0.0008 0 0.006 0
LATT 1
SYMM 0.5-X,0.5+Y,0.5-Z
SFAC C H N O
UNIT 20 16 16 12

L.S. 20
PLAN  20
BOND $H
Htab
conf
list 4
fmap 2
acta
TWIN 1 0 0 0 -1 0 0 0 -1 2
OMIT -4 140
OMIT 1 2 2
OMIT -1 2 4
OMIT -1 2 6
OMIT 1 0 5
REM <olex2.extras>
REM <HklSrc "%.\\UrAc_173K.hkl">
REM </olex2.extras>

WGHT    0.093800    0.637500
EXTI    0.001760
BASF   0.03914
FVAR       3.92551
O1    4    0.925637    0.483978    0.367733    11.00000    0.03466    0.04682 =
         0.03166    0.00044   -0.00488    0.00691
O2    4    0.581922    0.769269    0.630059    11.00000    0.03976    0.04257 =
         0.02239    0.00227   -0.00544   -0.00039
O3    4   -0.030149    0.966845    0.359563    11.00000    0.03122    0.04162 =
         0.02652   -0.00006   -0.00419    0.00477
N1    3    0.753973    0.636030    0.494712    11.00000    0.02910    0.03311 =
         0.02835    0.00331   -0.00677    0.00101
AFIX  43
H1    2    0.858671    0.608133    0.535045    11.00000   -1.20000
AFIX   0
N2    3    0.614742    0.634029    0.328830    11.00000    0.03260    0.03538 =
         0.02489    0.00035   -0.00587    0.00063
AFIX  43
H2    2    0.620107    0.605271    0.265385    11.00000   -1.20000
AFIX   0
N3    3    0.235039    0.875713    0.474848    11.00000    0.02972    0.03504 =
         0.02334   -0.00151   -0.00051    0.00115
AFIX  43
H3    2    0.183154    0.917291    0.530697    11.00000   -1.20000
AFIX   0
N4    3    0.273841    0.799260    0.313450    11.00000    0.03146    0.03284 =
         0.02200   -0.00013   -0.00415    0.00038
AFIX  43
H4    2    0.249162    0.785928    0.249293    11.00000   -1.20000
AFIX   0
C1    1    0.773785    0.578649    0.395563    11.00000    0.02927    0.03191 =
         0.03307    0.00314   -0.00616   -0.00266
C2    1    0.448596    0.735271    0.365123    11.00000    0.02886    0.02858 =
         0.02676    0.00045   -0.00465   -0.00257
C3    1    0.427728    0.783193    0.464850    11.00000    0.02945    0.03178 =
         0.02494   -0.00019   -0.00365   -0.00109
C4    1    0.586127    0.733606    0.538375    11.00000    0.03140    0.02843 =
         0.02727    0.00209   -0.00397   -0.00496
C5    1    0.142512    0.889251    0.381126    11.00000    0.03097    0.03228 =
         0.02598    0.00040   -0.00286   -0.00329
HKLF 4


REM  urac_173k_a.res in P2(1)/n
REM wR2 = 0.1751, GooF = S = 1.111, Restrained GooF = 1.111 for all data
REM R1 = 0.0556 for 991 Fo > 4sig(Fo) and 0.0616 for all 1121 data
REM 111 parameters refined using 0 restraints

END

WGHT      0.0938      0.6375

REM Instructions for potential hydrogen bonds
EQIV $1 -x+2, -y+1, -z+1
HTAB N1 O1_$1
EQIV $2 -x+1/2, y-1/2, -z+1/2
HTAB N2 O3_$2
EQIV $3 -x, -y+2, -z+1
HTAB N3 O3_$3
EQIV $4 x-1/2, -y+3/2, z-1/2
HTAB N4 O2_$4

REM Highest difference peak  0.428,  deepest hole -0.238,  1-sigma level  0.072
Q1    1   0.4189  0.7855  0.6351  11.00000  0.05    0.43
Q2    1   0.4456  0.7578  0.5251  11.00000  0.05    0.31
Q3    1   1.0777  0.4411  0.3623  11.00000  0.05    0.25
Q4    1   0.5983  0.7510  0.4612  11.00000  0.05    0.25
Q5    1   0.2998  0.7786  0.6181  11.00000  0.05    0.24
Q6    1   0.9224  0.4865  0.2998  11.00000  0.05    0.22
Q7    1   0.1174  0.9974  0.3676  11.00000  0.05    0.20
Q8    1   0.2806  0.9037  0.3543  11.00000  0.05    0.20
Q9    1   0.5891  0.7414  0.3594  11.00000  0.05    0.19
Q10   1   0.4259  0.7965  0.3221  11.00000  0.05    0.18
Q11   1   0.9199  0.5251  0.4454  11.00000  0.05    0.18
Q12   1   1.0365  0.5312  0.2747  11.00000  0.05    0.18
Q13   1   0.2599  0.7639  0.4992  11.00000  0.05    0.18
Q14   1   0.6043  0.6438  0.4992  11.00000  0.05    0.17
Q15   1   0.5041  0.8211  0.4138  11.00000  0.05    0.17
Q16   1   0.7394  0.7138  0.3258  11.00000  0.05    0.17
Q17   1   0.4318  0.7544  0.4231  11.00000  0.05    0.17
Q18   1   0.4215  0.6938  0.4368  11.00000  0.05    0.17
Q19   1   0.3267  0.6372  0.2005  11.00000  0.05    0.16
Q20   1   0.4331  0.6399  0.4769  11.00000  0.05    0.16
;
_shelx_res_checksum                7259
_shelx_hkl_file
;
   0   0   1 5.72758 5.81871  13
   0   0  -1 3.40373 6.63807  15
   0   0  -2 35561.6 854.760  15
   0   0  -2 35681.8 856.034   8
   0   0  -3 29.0381 22.8327   8
   0   0  -3 4.21020 21.4107  15
   0   0  -4 56608.1 1409.53   8
   0   0   4 59116.6 1399.83  11
   0   0   5-3.43098 22.7264  11
   0   0  -5 19.9208 25.1023   8
   0   0   6 67626.6 1712.49  11
   0   0  -6 70968.1 1725.19   8
   0   0   6 70792.7 1725.34   4
   0   0  -7-6.20359 27.6378   8
   0   0   7 19.0354 32.4258   4
   0   0  -7 12.7222 31.1802   2
   0   0   8 34386.6 981.785   4
   0   0  -8 36218.3 985.588   2
   0   0  -8 35284.4 977.846   8
   0   0  -9-9.15228 32.4039   8
   0   0  -9 9.28513 31.4748   2
   0   0   9-9.31786 32.9902   4
   0   0 -10 1507.80 143.577   8
   0   0 -10 1644.70 97.0100   6
   0   0 -10 1652.74 149.472   2
   0   0  10 1907.77 159.857   4
   0   0 -11 13.0052 30.3768   6
   0   0 -12 8451.63 285.523   6
   0   0 -13 42.9845 32.8913   6
   0   0 -14 650.525 62.1400   6
   0   0 -15-26.0462 25.2792   6
   0   0 -16 697.824 45.3008   6
   0  -1   0 3.62952 7.49573   9
   0  -1   0 7.05693 5.09135  15
   0   1   0 18.1412 8.32847  13
   0   1   0 12.2068 12.1619  16
   0  -1  -1 331.029 25.0896   9
   0   1  -1 290.218 18.8533  10
   0  -1  -1 337.840 21.7681   8
   0   1  -1 283.930 20.6173  16
   0   1   1 336.464 26.5939  13
   0   1  -1 359.984 28.4552   7
   0  -1  -1 292.843 21.7411  15
   0  -1  -2 38543.2 918.924   9
   0   1  -2 37970.9 906.928  10
   0   1  -2 37059.0 895.605  16
   0  -1   2 37439.2 888.394  11
   0  -1  -2 38246.2 912.049   8
   0  -1  -2 37962.2 913.926  15
   0   1  -2 38671.7 918.941   7
   0  -1  -2 38988.4 917.148  17
   0   1  -3 326.167 39.7029   7
   0  -1  -3 364.321 38.5834   8
   0  -1  -3 342.373 38.3406  15
   0  -1  -3 354.701 37.6876  17
   0   1   4 6789.62 223.622  11
   0   1  -4 6637.91 218.899   8
   0  -1  -4 6903.23 223.758  15
   0  -1  -4 6579.07 217.920   8
   0  -1  -5 70.0307 28.6103   8
   0  -1   5 82.1479 30.8993   4
   0   1  -5 83.8838 31.4085   8
   0   1   5 79.1384 33.5665  11
   0   1   5 68.9782 29.3771   4
   0   1  -6 4610.57 190.891   8
   0  -1  -6 4273.70 189.939   8
   0   1   6 3911.14 184.589   4
   0  -1   6 4291.05 189.855   4
   0   1   6 4208.76 186.578  11
   0   1  -7 12.7788 31.3185   2
   0  -1  -7 19.3334 30.1839   8
   0  -1  -7 6.43096 31.5223   2
   0   1   7-19.2708 30.7941  11
   0   1  -7-6.14620 25.9006   8
   0  -1   7 12.9828 32.5028   4
   0   1   7 6.38486 31.9694   4
   0   1  -8 2103.84 147.324   2
   0  -1   8 2164.48 153.889   4
   0  -1  -8 2509.55 160.039   2
   0   1  -8 2254.34 151.485   8
   0   1   8 2116.92 148.548  11
   0  -1  -8 2441.84 157.458   8
   0   1   8 2192.10 153.714   4
   0  -1  -9 477.082 81.7386   8
   0   1  -9 438.912 72.9071   8
   0  -1  -9 607.806 86.1750   2
   0   1  -9 454.804 77.2564   2
   0   1   9 411.134 74.7746   4
   0  -1   9 480.445 78.3887   4
   0  -1 -10 143.687 37.8291  21
   0  -1  10 164.375 56.1178   4
   0   1  10 217.560 59.9819   4
   0  -1 -10 133.470 54.6389   8
   0   1 -10 170.883 38.4893   6
   0  -1 -10 284.394 67.1752   2
   0  -1 -10 122.159 31.1480   6
   0   1 -10 108.539 53.3252   2
   0   1 -10 200.971 56.2914   8
   0   1 -11 1808.80 103.968   6
   0  -1 -11 1664.68 101.723   6
   0  -1 -11 1581.26 101.463  21
   0  -1 -12 3049.87 148.865  21
   0  -1 -12 3387.53 151.527   6
   0   1 -12 3282.59 150.087   6
   0   1 -13 229.445 45.5791   6
   0  -1 -13 332.490 47.9251   6
   0  -1 -14 349.491 46.7582   6
   0   1 -14 396.794 48.2688   6
   0   1 -15 27.1160 23.8473   6
   0   1  15 19.8906 20.9501  23
   0  -1 -15 27.0819 21.2684   6
   0  -1 -16 1.67789 15.0488   6
   0   1 -16-11.7623 15.4571   6
   0   2   0 18957.8 492.646   7
   0   2  -1 228.931 29.8062  16
   0   2   1 244.931 29.7014  11
   0   2  -1 221.095 34.0270   7
   0   2  -2 3656.79 136.719   7
   0  -2  -2 3476.93 136.235  17
   0  -2  -2 3180.48 118.911  15
   0   2   2 3209.37 127.012  11
   0   2  -2 3618.08 121.512  16
   0  -2  -2 3610.77 129.149   9
   0   2  -3 2589.96 117.525   7
   0  -2  -3 2281.64 111.882  17
   0   2   3 2506.13 114.129  11
   0  -2  -3 2409.38 106.338  15
   0   2  -4 12663.2 377.036   7
   0  -2  -4 11910.4 363.926   8
   0   2   4 12581.9 375.932  11
   0  -2  -4 12737.5 377.833  17
   0  -2  -5 2368.78 126.057   8
   0   2   5 2440.45 134.670  11
   0  -2  -6 2553.11 143.351   8
   0   2   6 2476.54 145.363  11
   0   2   7 1207.00 108.296  11
   0  -2  -7 1199.98 102.579   8
   0   2   8 2678.84 179.629  11
   0  -2  -8 2915.33 179.188   8
   0   2   9 2972.41 198.183  11
   0  -2  -9 2588.94 126.983  21
   0  -2 -10 90.8317 32.5494  21
   0   2  10 70.5893 43.3974  11
   0  -2 -11 2099.76 119.796  21
   0  -2 -12 612.387 66.0335  21
   0  -2 -13 297.379 47.7988  21
   0  -2 -14 1276.20 81.2951  21
   0   2  15 24.2896 22.0742  23
   0   3   0 20.3666 27.6194   7
   0   3  -1 1254.94 84.2247   7
   0  -3  -2 21555.8 599.707  17
   0   3  -2 21863.4 598.731   7
   0   3   3 675.197 64.7203  11
   0   3  -3 583.383 64.2034   7
   0  -3  -3 729.381 71.4563  17
   0   3  -4 1726.05 114.165   7
   0   3   4 1736.83 113.358  11
   0  -3  -4 1661.95 112.837  17
   0   3  -5 1474.24 111.619   7
   0   3   5 1702.80 118.941  11
   0   3   6 3971.58 207.106  11
   0   3   7 551.486 79.9691  11
   0  -3  -8 312.372 44.7212  21
   0   3   8 364.820 74.1910  11
   0   3   9 450.604 87.1887  11
   0  -3  -9 457.726 56.2487  21
   0  -3 -10 3004.01 146.194  21
   0  -3 -11 726.857 70.2168  21
   0   3  12 390.001 51.3134  30
   0  -3 -12 315.526 50.8456  21
   0  -3 -13 3366.07 151.084  21
   0   3  13 3666.60 146.359  30
   0   3  14 34.8861 23.8332  23
   0   3  15 15.0218 16.9929  23
   0   4   0 3125.03 162.363   7
   0  -4  -1 491.274 65.2725  17
   0   4  -1 351.259 57.3635   7
   0   4  -2 2610.38 149.029   7
   0  -4  -2 2279.20 143.687  17
   0  -4  -3 835.640 87.3465  17
   0   4  -3 980.215 91.9575   7
   0  -4  -4 15701.7 513.762  17
   0   4  -4 15653.5 508.363   7
   0   4  -5 9076.71 358.357   7
   0  -4  -5 9240.29 364.453  17
   0   4  -6 210.345 58.5749   7
   0   4  -7 2231.86 108.864  20
   0   4   7 2285.61 174.107  11
   0   4   7 2139.29 117.243  28
   0   4   8 830.557 74.8633  28
   0   4   8 1048.12 125.128  11
   0   4  -8 827.489 67.6700  20
   0   4   9 3127.86 153.437  28
   0   4  -9 3250.30 141.000  20
   0   4  10 6205.75 231.946  28
   0  -4 -10 5905.75 226.022  21
   0  -4 -11 585.375 63.3445  21
   0   4  11 505.472 60.4518  30
   0  -4 -12 5897.78 217.246  21
   0   4  12 6221.00 213.727  30
   0   4  13 2262.25 103.247  30
   0   4  13 2162.02 104.389  23
   0   4  14 651.449 47.2685  23
   0   4  14 735.328 47.6233  30
   0  -5   0 8.06659 29.7267  17
   0   5   0 8.29908 29.3837   7
   0  -5  -1 218.739 51.9192  17
   0   5  -1 319.018 61.5525   7
   0   5   1 235.302 55.9670   7
   0  -5  -2 352.841 68.2952  17
   0   5  -2 439.297 71.2235   7
   0  -5  -3 1151.27 116.773  17
   0   5  -3 1041.26 108.148   7
   0   5   3 972.788 104.814   7
   0   5  -4 42.6397 23.7167  20
   0  -5  -4 10.2805 36.4061  17
   0   5   4 47.6283 26.6116  24
   0   5  -4 18.9972 30.7092   7
   0   5   5 1288.79 87.1533  24
   0   5  -5 1325.22 82.8230  20
   0   5   5 1514.13 95.3977  28
   0   5   6 1190.41 88.2320  24
   0   5  -6 1259.83 81.0522  20
   0   5   6 1210.91 89.6074  28
   0   5   7 144.181 43.0221  28
   0   5  -7 219.109 42.9032  20
   0   5   8 1066.44 86.8959  28
   0   5  -8 992.211 76.6443  20
   0   5  -9 304.686 48.2146  20
   0   5   9 349.449 54.6939  28
   0   5 -10 81.0760 32.2718  20
   0   5  10 70.1513 32.4074  30
   0   5 -11 1368.46 78.6406  20
   0   5  11 1361.02 83.5703  30
   0   5  12 584.637 50.6504  30
   0   5  13-12.3752 18.7388  30
   0   6   0 1925.59 113.504  29
   0   6   1 1506.64 100.720  29
   0   6  -1 1548.74 100.229  29
   0  -6  -2 641.323 99.2662  17
   0   6   2 728.800 69.9933  29
   0   6  -2 708.241 68.0431  29
   0   6  -3 175.817 39.9603  29
   0   6  -5 180.521 38.3869  20
   0   6   5 105.725 37.7290  24
   0   6   6 727.766 71.2496  28
   0   6  -6 783.337 66.4722  20
   0   6   7 3939.32 171.172  31
   0   6  -7 3624.93 154.771  20
   0   6  -8 367.239 49.8135  20
   0   6   8 399.889 51.0732  31
   0   6  -9 138.244 35.1067  20
   0   6 -10 39.0175 26.2769  20
   0   6 -11 351.699 35.4490  20
   0   6  11 321.511 35.6896  30
   0   6  12 955.521 49.0394  30
   0   7   0 9.77824 29.5634  29
   0   7  -1 418.773 55.4739  29
   0   7   1 340.269 53.1016  29
   0   7   2 197.587 44.4778  29
   0   7  -2 150.894 39.3526  29
   0   7   3 426.948 56.9377  29
   0   7   4 62.5945 33.4084  29
   0   7   5 1350.85 95.3919  29
   0   7   6 218.338 44.1154  29
   0   7   6 290.689 46.9374  31
   0   7  -7 368.340 42.5416  20
   0   7   7 369.660 48.2513  31
   0   7   7 337.874 48.7828  29
   0   7   8 63.8903 25.9285  31
   0   7   8 31.1693 25.5386  29
   0   7  -8 18.2012 23.0301  20
   0   7  -9 125.341 26.0327  20
   0   7   9 141.960 30.3113  29
   0   7 -10 209.693 25.4321  20
   0   7  10 219.072 28.5019  29
   0   8   0 3150.00 137.080  29
   0   8   1 114.823 32.4535  29
   0   8   2 756.128 62.0778  31
   0   8   2 691.455 60.2857  29
   0   8   3 134.221 32.5184  29
   0   8   3 210.549 37.5804  31
   0   8   4 45.6854 26.2669  31
   0   8   4 6.63628 21.9846  29
   0   8   5 1765.06 89.7449  31
   0   8   5 1671.48 87.5789  29
   0   8   6 697.467 52.8123  29
   0   8   6 809.779 55.8556  31
   0   8   7 1753.05 78.3265  31
   0   8   7 1693.03 76.9133  29
   1   0 -16-3.51714 15.1451   6
   1   0 -15 1882.95 90.9076   6
   1   0 -14-18.1756 28.7818   6
   1   0 -13 1044.30 80.6285   6
   1   0 -12-26.7803 29.9204   6
   1   0 -11 2356.97 123.127   6
   1   0 -10-7.98894 24.4956   6
   1   0 -10-11.2810 43.1408   2
  -1   0  10 33.1453 40.7146   4
   1   0  -9 1050.95 117.000   2
  -1   0   9 1126.21 117.178   4
   1   0  -8 32.6927 35.4489   2
   1   0  -7 3209.32 178.313   2
   1   0  -7 3258.31 170.193  15
  -1   0   6-46.2807 28.7746  13
   1   0  -6 16.2521 28.7725   8
   1   0  -6-16.5347 32.3619   2
   1   0  -6 9.87256 24.7187  15
  -1   0   5 26105.7 677.090  13
   1   0  -5 25469.0 677.807  15
   1   0  -5 25128.4 690.784   8
   1   0  -5 25506.4 687.173   2
  -1   0   4 18.1923 22.3504  13
   1   0  -4 18.8994 25.9587  15
   1   0  -4 14.1796 28.5312   2
   1   0  -3 8519.18 255.381   2
  -1   0   3 8247.19 243.345  13
   1   0  -2-2.16178 19.7623   2
  -1   0   2-9.09743 12.0230  16
   1   0  -2 10.0264 18.8959  12
   1   0  -1 20903.5 522.485  14
  -1   0   0 3.89943 5.95822   7
  -1   0   0 1.61365 13.8971   3
  -1   0  -1 1351.02 68.6324   9
  -1   0  -1 1038.78 64.3663   1
  -1   0  -2 2.23415 21.5419   9
  -1   0  -3 2464.71 108.887   9
  -1   0  -3 2475.98 108.563  10
  -1   0  -4-10.4604 25.4509  10
   1   0   4 6.90793 22.8789  11
   1   0   4 29.9065 29.0989   4
  -1   0  -4 17.7289 26.3838   9
  -1   0  -5 4083.26 175.064  10
   1   0   5 4286.22 181.167   4
   1   0   5 3796.55 168.749  11
   1   0   6-11.4481 29.8311   4
   1   0   6 5.12501 25.1210  11
  -1   0  -7 12381.3 410.027   8
   1   0   7 11497.8 410.319   4
  -1   0  -8 8.16852 33.3966   8
   1   0   8 24.9813 42.5554   4
  -1   0  -9 7947.50 348.967   8
   1   0   9 8294.27 353.165   4
  -1   0 -10-10.9419 44.7360   8
  -1   0 -10 12.2905 27.1409   6
  -1   0 -10-44.8288 44.3657   2
  -1   0 -11 2627.48 131.877   6
  -1   0 -12 4.49541 31.1621   6
  -1   0 -13 523.847 59.8056   6
  -1   0 -14 7.20948 27.0742   6
  -1   0 -15 348.911 40.5999   6
  -1   0 -16-1.69382 14.4842   6
   1  -1 -16 31.1294 15.1859   6
   1   1 -16 18.5749 14.3373   6
   1   1 -15 124.341 26.6221   6
   1  -1 -15 116.961 26.3111   6
   1   1 -14 34.6200 26.2434   6
   1  -1 -14-3.46754 26.2854   6
   1  -1 -13 2956.03 137.077   6
   1   1 -13 2759.74 134.439   6
   1  -1 -12 1441.45 95.9189  21
   1  -1 -12 1301.08 90.8711   6
   1   1 -12 1272.30 90.1013   6
   1   1 -11 361.696 50.2742   6
   1  -1 -11 356.457 51.8465   6
   1  -1 -11 351.078 50.6455  21
   1  -1 -10 2499.66 124.459  21
  -1  -1  10 2352.10 186.206   4
   1  -1 -10 2741.83 127.705   6
  -1   1  10 2307.22 182.498   4
   1   1 -10 2513.80 190.549   2
   1   1 -10 2480.04 124.370   6
   1  -1 -10 2549.94 194.700   2
   1  -1  -9 304.024 67.4585   2
   1   1  -9 281.698 67.5531   2
  -1  -1   9 181.080 59.4984   4
  -1   1   9 199.472 58.5012   4
  -1   1   8 348.494 63.9702  11
   1   1  -8 351.904 65.3676   2
   1  -1  -8 437.826 71.6693   2
   1   1  -7 8414.45 316.763   8
   1  -1  -7 8935.20 327.050   2
   1  -1  -7 8594.12 320.564  15
   1   1  -7 8282.94 319.698   2
  -1   1   6 3019.82 157.244  13
   1   1  -6 3132.29 156.676   8
   1  -1  -6 3603.29 169.081   2
   1   1  -6 3128.72 160.417   2
   1  -1  -6 3267.92 162.142  15
   1   1  -5 727.045 65.4541  15
   1   1  -5 924.768 76.7882   2
   1  -1  -5 743.014 69.8861   2
  -1   1   5 866.975 73.3765  13
   1  -1  -5 967.305 76.5534  15
   1   1  -5 770.854 67.3772   8
   1   1  -4 816.526 59.6406  15
  -1   1   4 967.189 71.8722  13
   1   1  -4 1005.45 70.9365   2
   1   1  -4 904.192 65.8339   8
   1  -1  -4 1097.79 74.2769   2
   1  -1  -4 1068.31 73.4615  15
   1   1  -3 1278.86 76.3310   2
   1  -1  -3 1329.60 66.8785  17
  -1   1   3 1255.32 78.6917  13
   1   1  -3 1064.86 63.3619  15
  -1   1   3 1249.55 67.1590  16
   1  -1  -3 1251.03 75.3792   2
  -1   1   2 51569.9 1255.71  16
   1   1  -2 52831.1 1244.94  12
   1   1  -2 51983.4 1256.40   2
   1  -1  -2 52444.1 1263.35  12
  -1   1   1 755.308 44.9150   3
   1  -1  -1 824.656 47.7658  14
  -1   1   1 784.797 49.0902  16
   1   1  -1 861.791 47.7353  14
  -1  -1   1 748.070 43.9007   3
   1   1  -1 782.839 35.6617   7
   1  -1  -1 830.381 50.0453  12
  -1   1   0 5135.23 144.176   7
   1   1   0 4437.71 123.246   7
  -1  -1   0 4598.80 140.896   3
  -1   1   0 4889.70 143.312   3
  -1   1  -1 112.965 26.4197   1
  -1  -1  -1 119.616 32.5205   9
  -1   1  -1 77.6796 14.9463   9
  -1  -1  -1 61.1004 22.9034   1
  -1  -1  -2 27983.6 699.144  10
  -1   1  -2 28105.2 688.985   9
  -1   1  -2 27940.2 706.675   7
   1   1   2 29215.4 718.648  11
  -1  -1  -2 29099.9 723.581   9
   1   1   3 7303.65 228.461  11
  -1   1  -3 6841.74 218.057  10
  -1  -1  -3 6668.75 227.550   9
  -1  -1  -3 6679.97 210.179  10
  -1   1  -3 6553.43 214.905   7
  -1   1  -4 692.131 61.7853  10
  -1  -1  -4 767.282 69.3558   9
   1  -1   4 799.536 68.7413   4
   1   1   4 751.614 64.1788   4
   1   1   4 702.927 65.8295  11
  -1  -1  -5 1635.12 101.116   8
  -1   1  -5 1722.26 102.888  10
   1  -1   5 1537.97 102.828   4
  -1  -1  -5 1697.30 108.712   9
   1   1   5 1620.51 105.645   4
   1   1   5 1709.38 107.866  11
  -1  -1  -6 753.994 78.2765   8
   1  -1   6 729.733 80.0923   4
   1   1   6 786.355 78.3785   4
   1   1   6 872.080 84.0835  11
  -1  -1  -7 1686.20 123.776   8
   1   1   7 1659.30 125.298  11
  -1   1  -7 1652.43 123.092   8
   1  -1   7 1434.90 116.197   4
   1   1   7 1260.29 111.939   4
   1  -1   8 211.030 54.1079   4
  -1  -1  -8 226.258 52.4706   8
   1   1   8 216.528 58.5654   4
  -1   1  -8 239.545 58.0920   8
   1   1   8 191.024 50.4657  11
  -1   1  -9 2405.58 170.861   8
  -1  -1  -9 2118.47 163.057   8
  -1  -1 -10 543.331 59.9312  21
  -1   1 -10 587.603 62.1004   6
  -1  -1 -10 538.395 89.1165   2
  -1  -1 -10 573.294 59.9146   6
  -1   1 -10 602.339 96.3626   2
  -1   1 -10 731.136 103.737   8
  -1  -1 -10 757.082 105.802   8
  -1   1 -11 750.550 70.0849   6
  -1  -1 -11 617.199 64.7613  21
  -1  -1 -11 669.604 64.7525   6
  -1   1 -12 3151.47 146.821   6
  -1  -1 -12 3168.27 149.157  21
  -1  -1 -12 3261.49 149.049   6
  -1   1 -13 492.110 57.8373   6
  -1  -1 -13 496.137 56.6157   6
  -1  -1 -14 78.6960 28.4324   6
  -1   1 -14 37.8601 29.4532   6
   1   1  14 32.4334 25.8070  23
  -1   1 -15 5.09400 21.3133   6
  -1  -1 -15 35.4595 21.0360   6
  -1   1 -16 123.803 19.1942   6
   1  -2 -15 300.875 35.1354  21
   1  -2 -14 1807.62 96.3969  21
   1  -2 -13 1434.03 95.0859  21
   1  -2 -12 136.102 41.9346  21
   1  -2 -11 7460.58 264.679  21
  -1   2  10 2973.27 216.516  11
   1  -2 -10 3286.89 149.744  21
  -1   2   9 2123.52 164.254  11
   1   2  -9 1766.90 108.539  26
   1  -2  -9 1881.80 104.762  21
  -1   2   8 2255.69 162.718  11
   1  -2  -7 22914.3 681.730  15
   1  -2  -6 3446.76 174.647  15
   1  -2  -5 11706.7 376.110  15
  -1   2   5 12030.9 385.789  13
  -1   2   4 2161.19 121.739  13
   1  -2  -4 1875.10 111.429  17
   1  -2  -4 2202.98 113.454  15
  -1   2   3 12327.1 373.435  13
  -1   2   3 12506.0 372.464  16
   1  -2  -3 12453.4 361.408  15
   1   2  -3 12061.9 352.783   7
   1   2  -2 60266.2 1447.82   7
  -1   2   2 60122.6 1464.01  13
  -1   2   2 60152.9 1472.23  16
   1  -2  -2 59982.5 1456.60  12
  -1   2   1 212491. 4974.58  16
  -1   2   1 211810. 4957.40  13
   1   2  -1 211729. 4946.94   7
   1  -2  -1 212072. 4951.75  12
  -1   2   0 125175. 2905.66   7
  -1   2   0 125027. 2909.02  16
  -1  -2   0 121962. 2895.55  17
   1   2   0 120428. 2882.62   7
  -1  -2  -1 45824.8 1145.31  17
  -1  -2  -1 45158.4 1167.51   9
  -1   2  -1 46900.7 1153.17   7
  -1   2  -1 48774.4 1152.61  16
   1   2   2 8842.50 283.262  11
  -1   2  -2 8854.15 282.890   7
  -1   2  -2 9050.20 280.078  16
  -1  -2  -3 56283.4 1406.54   9
   1   2   3 57288.4 1402.09  11
  -1   2  -3 56211.9 1394.38   7
  -1   2  -3 55853.9 1378.89  10
  -1  -2  -4 16963.5 505.066   9
  -1   2  -4 17384.5 483.589  10
  -1   2  -4 16763.5 494.673   7
   1   2   4 17543.7 507.441  11
  -1  -2  -5 1990.29 127.494   9
  -1   2  -5 1937.22 123.868   7
  -1   2  -5 1903.83 115.253  10
   1   2   5 1781.89 123.663  11
   1   2   6 26234.5 756.194  11
   1   2   7 19013.3 615.210  11
  -1   2  -7 20055.6 600.530   8
   1   2   8 344.900 71.0584  11
   1   2   9 1063.58 121.243  11
   1   2   9 892.088 70.2606  30
  -1  -2  -9 839.794 74.0115  21
  -1  -2 -10 1940.71 113.463  21
   1   2  10 1831.87 105.235  30
   1   2  11 17368.3 487.671  30
  -1  -2 -11 16862.4 497.058  21
  -1  -2 -12 723.584 70.4729  21
   1   2  13 543.578 60.9546  23
   1   2  14 1020.69 72.7393  23
   1   2  15 1813.18 85.1721  23
  -1   3  15 90.4693 21.9423  23
   1  -3 -14 293.574 38.4968  21
   1  -3 -13 314.384 48.3940  21
  -1   3  13 392.591 46.7124  30
   1  -3 -12 1179.90 88.3106  21
   1  -3 -11 1926.21 115.044  21
   1  -3 -10 94.3368 39.1830  21
   1   3 -10 26.4657 31.5671  26
  -1   3   9 225.618 66.6143  11
   1  -3  -9 172.421 39.1085  21
   1   3  -9 186.927 41.8522  26
   1   3  -8 1545.93 99.0351  26
   1  -3  -8 1334.60 88.4384  21
  -1   3   8 1600.91 145.217  11
  -1   3   8 1346.46 88.4033  28
  -1   3   7 107.174 48.3651  11
  -1   3   6 2143.78 147.809  11
   1  -3  -5 2330.56 140.820  17
   1  -3  -4 523.242 65.3803  17
  -1   3   4 506.001 64.8449  13
   1  -3  -3 3385.39 161.872  17
  -1   3   3 3091.02 152.930  13
  -1   3   2 8329.59 294.587  16
  -1   3   1 29.9090 27.4450  16
  -1   3   0 659.565 65.5452   7
  -1   3   0 667.628 66.9991  16
  -1  -3   0 601.399 56.9552  17
  -1  -3  -1 125.186 33.4089  17
  -1   3  -1 113.237 34.1162  16
  -1   3  -1 94.6985 34.3162   7
  -1   3  -2 4149.22 181.721   7
  -1  -3  -2 4133.04 179.374  17
  -1   3  -2 4059.38 172.593  16
  -1   3  -3 1105.56 91.2386   7
   1   3   3 1094.28 88.2374  11
  -1   3  -4 3231.12 167.956   7
   1   3   4 3205.67 166.219  11
  -1  -3  -4 3313.66 171.519   9
   1   3   5 585.027 74.6346  11
  -1  -3  -5 498.347 71.0386   9
  -1   3  -5 655.683 78.7329   7
  -1   3  -6 3226.92 188.206   7
   1   3   6 3376.03 193.716  11
   1   3   7 1028.97 111.132  11
  -1  -3  -8 1459.74 92.9152  21
   1   3   8 1739.95 152.432  11
  -1  -3  -9 55.3817 33.7102  21
   1   3   9 84.0047 45.9109  11
   1   3   9 41.6438 31.5913  30
  -1  -3 -10 14.6321 31.1381  21
   1   3  10 47.7901 34.4016  30
   1   3  11 3294.91 152.428  30
  -1  -3 -11 3460.88 160.941  21
   1   3  12 1793.22 111.129  23
  -1  -3 -12 1954.65 111.927  21
   1   3  12 1777.65 102.762  30
   1   3  13 90.0193 30.1690  30
   1   3  13 92.9774 32.7192  23
   1   3  14 35.7856 24.3947  23
   1   3  14 29.5807 21.3911  30
   1   3  15 29.1237 14.9971  23
  -1   4  14-1.91341 17.9237  30
   1  -4 -13 829.350 63.8558  21
  -1   4  13 840.657 60.4188  30
   1  -4 -12 31.2727 29.3684  21
   1  -4 -11 1934.74 111.500  21
   1  -4 -10 529.269 60.7886  21
  -1   4  10 525.110 62.2366  28
   1   4 -10 443.136 61.1444  26
   1   4  -9 165.658 40.2385  20
  -1   4   9 262.263 47.5865  28
   1   4  -9 200.699 47.2951  26
   1   4  -8 2975.06 154.470  26
   1   4  -8 3315.99 144.139  20
  -1   4   8 3450.72 158.157  28
   1   4  -7 342.918 46.7146  20
  -1   4   7 348.796 48.9587  24
  -1   4   7 381.180 50.3036  28
  -1   4   7 477.771 83.7850  11
  -1   4   6 2076.84 111.742  28
   1   4  -6 2027.49 101.717  20
   1   4  -6 2005.76 110.148  29
  -1   4   6 1933.47 106.486  24
   1  -4  -5 499.792 77.8143  17
   1  -4  -4 1280.20 112.678  17
   1  -4  -3 2670.31 162.549  17
  -1   4   2 2680.44 157.528   7
  -1   4   1 7504.16 294.179   7
  -1   4   0 1241.79 103.329  16
  -1   4   0 1232.25 105.381   7
  -1  -4  -1 1159.76 98.5399  17
  -1   4  -1 1263.54 106.323   7
  -1   4  -1 1410.15 107.912  16
  -1  -4  -2 563.455 71.0946  17
  -1   4  -2 648.205 80.4166   7
  -1   4  -3 5658.20 255.047   7
  -1   4  -4 3135.18 184.541   7
  -1   4  -5 98.5603 44.9211   7
   1   4   6 4960.26 185.757  31
  -1   4  -6 4415.02 246.195   7
   1   4   6 4258.73 178.130  28
   1   4   7 821.607 107.169  11
   1   4   7 632.810 63.1974  31
   1   4   7 705.065 70.0857  28
   1   4   8 531.430 59.1594  30
  -1   4  -9 1445.95 87.9394  20
   1   4   9 1332.53 90.8179  30
  -1  -4 -10 177.295 42.5853  21
   1   4  10 180.801 43.3064  30
   1   4  11 428.753 54.6317  23
   1   4  11 456.467 56.6260  30
   1   4  12 123.668 33.2449  23
   1   4  12 70.6361 31.9577  30
   1   4  13 1804.16 92.7284  23
   1   4  13 1894.34 91.4769  30
   1   4  14-4.09114 15.5058  23
   1   4  14 26.7286 17.6705  30
  -1   5  13 658.733 45.0125  30
  -1   5  12 618.607 51.3812  30
   1   5 -11 286.265 39.3190  20
   1   5 -10 586.027 55.6406  20
   1   5 -10 670.666 70.1389  26
  -1   5  10 518.657 59.7400  28
   1   5  -9 40.4748 34.3096  26
  -1   5   9 9.69291 32.1115  28
   1   5  -9 57.5081 32.5589  20
  -1   5   8 230.232 48.2237  28
   1   5  -8 235.258 42.2289  20
   1   5  -8 158.177 43.0380  26
  -1   5   7 836.618 77.1426  28
   1   5  -7 809.527 68.3973  20
  -1   5   7 684.627 69.7734  24
  -1   5   6 576.668 62.1230  18
   1   5  -6 571.442 59.1059  20
  -1   5   6 518.061 59.2467  28
  -1   5   6 522.662 59.4466  24
   1   5  -5 670.949 59.9313  20
   1   5  -5 738.368 69.4117  29
   1  -5  -5 800.432 107.563  17
  -1   5   5 637.155 63.5767  18
  -1   5   5 653.600 63.2878  24
  -1   5   5 845.374 72.2479  28
   1   5  -4 3209.42 153.961  29
   1  -5  -4 3865.38 225.604  17
  -1   5   4 3279.31 148.572  18
   1   5  -4 3239.83 138.125  20
  -1   5   4 3787.36 222.480   7
  -1   5   4 3552.30 152.796  24
  -1   5   3 90.0325 28.1395  24
   1  -5  -3 126.987 48.9868  17
  -1   5   3 106.451 44.3182   7
   1   5  -3 182.097 37.8063  29
  -1   5   3 113.849 30.4168  18
  -1   5   2 161.251 53.2285   7
   1  -5  -2 159.334 52.5987  17
   1  -5  -1 706.011 91.4841  17
  -1   5   1 634.971 88.5821   7
  -1   5   0 3524.83 207.003   7
  -1   5  -1 1428.23 128.876   7
  -1   5  -2 169.934 54.7242   7
  -1   5  -3 58.7876 40.0793   7
  -1   5  -4 856.129 107.779   7
  -1   5  -5 3566.41 226.670   7
   1   5   6 110.218 36.7400  31
  -1   5  -7 94.0604 35.2222  20
   1   5   7 101.909 35.4926  31
  -1   5  -8 141.679 39.6111  20
   1   5   8 205.336 41.6038  31
  -1   5  -9 207.604 40.8279  20
   1   5   9 132.365 37.9922  30
   1   5  10 755.811 64.6354  30
  -1   5 -10 657.477 60.2805  20
  -1   5 -11 1200.76 71.9265  20
   1   5  11 1140.81 75.0182  30
   1   5  12 98.4089 27.8151  30
   1   5  13 525.896 39.4229  30
  -1   6  11 1769.58 78.3823  30
   1   6 -11 1633.13 75.2799  20
   1   6 -10 303.601 41.0419  26
   1   6 -10 269.333 38.1163  20
   1   6  -9 1173.55 82.5163  26
   1   6  -9 1250.26 77.7021  20
  -1   6   8 3067.88 146.758  28
   1   6  -8 3103.68 149.134  26
   1   6  -8 2959.29 133.721  20
   1   6  -7 1872.91 116.013  26
   1   6  -7 1719.97 100.131  20
  -1   6   7 1899.93 112.939  28
  -1   6   6 7157.03 256.405  24
   1   6  -6 7213.01 243.449  20
  -1   6   6 7238.07 258.441  28
  -1   6   5 474.647 60.1240  24
   1   6  -5 501.933 61.5120  29
   1   6  -5 512.791 56.3594  20
  -1   6   4 125.677 37.9889  24
   1   6  -4 265.046 47.3566  29
  -1   6   3 224.788 40.5220  24
   1   6  -3 127.027 39.4150  29
  -1   6   2 610.362 60.2075  24
   1   6  -2 545.933 64.2673  29
   1   6  -1 3117.57 153.817  29
   1  -6   0 3232.59 217.722  17
   1   6   0 3109.77 154.161  29
   1   6   1 1216.48 93.1637  29
   1   6   2 2591.21 138.525  29
   1   6   3 862.187 78.6635  29
  -1   6  -5 78.4647 31.7688  20
   1   6   5 69.8180 37.1471  31
  -1   6  -6 2121.61 109.272  20
   1   6   6 2140.65 123.092  31
   1   6   7 785.158 74.5698  31
  -1   6  -7 778.869 65.9121  20
   1   6   8 2155.30 120.142  31
  -1   6  -8 2430.46 114.887  20
  -1   6  -9 971.302 68.3567  20
   1   6   9 782.558 66.3891  31
  -1   6 -10 330.321 39.6005  20
  -1   6 -11 1826.26 79.0987  20
   1   7  -9 32.8400 19.8238  20
  -1   7   9 64.1621 21.4326  29
   1   7  -9 54.9948 22.0083  26
   1   7  -8 972.868 62.0340  20
  -1   7   8 999.499 67.3818  29
   1   7  -8 1021.30 69.0989  26
   1   7  -7-11.3449 24.0801  20
  -1   7   7 10.6325 25.0972  31
  -1   7   7 24.9606 26.7820  29
   1   7  -7 18.9276 24.1630  26
   1   7  -6 39.7234 27.4201  20
  -1   7   5 136.447 36.4894  24
  -1   7   4 29.6709 29.7024  24
   1   7  -4 4.65314 26.4816  29
  -1   7   3 353.274 50.1697  24
   1   7  -3 299.820 49.5056  29
   1   7  -2 19.8176 31.2181  29
   1   7  -1 30.1696 31.2683  29
   1   7   0 303.934 51.2106  29
   1   7   1 15.2388 29.3705  29
   1   7   2 35.3138 34.2116  29
   1   7   3 64.5193 35.1651  29
   1   7   3 45.3507 30.0643  31
   1   7   4 49.6912 32.3371  31
   1   7   4 43.3649 32.3108  29
   1   7   5 624.242 64.8043  29
   1   7   5 583.129 63.6367  31
   1   7   6 271.642 45.3313  31
   1   7   6 259.904 44.8316  29
  -1   7  -7 167.069 32.4698  20
   1   7   7 122.243 33.7278  29
   1   7   7 107.385 33.9906  31
  -1   7  -8 399.721 39.4994  20
   1   7   8 315.080 41.2749  31
   1   7   8 326.748 42.7460  29
  -1   7  -9 84.4240 21.8124  20
   1   7   9 77.7518 22.9620  31
   1   7   9 65.2332 21.7364  29
  -1   7 -10 151.617 21.4142  20
   1   7  10 66.0345 18.8046  29
  -1   8   7 110.232 22.2088  31
  -1   8   6 608.354 47.8950  31
   1   8  -6 655.937 47.8638  26
  -1   8   5 181.048 32.7161  31
   1   8  -5 184.721 31.7790  26
   1   8  -3 438.904 47.9956  29
   1   8  -2 140.785 32.5382  29
   1   8  -1 67.3036 29.8879  29
   1   8   0 482.688 53.7185  29
   1   8   1 196.878 37.7921  29
   1   8   2 151.611 35.6264  29
   1   8   3 1018.06 72.0187  29
   1   8   4 13.1603 23.5415  29
   1   8   4 18.1641 22.5287  31
   1   8   5 73.8845 24.9812  29
   1   8   5 92.7613 27.1705  31
   1   8   6 167.243 28.7657  29
   1   8   6 177.642 28.8062  31
   1   8   7 304.558 31.6960  31
   1   8   7 274.479 29.4202  29
   1   9   0-8.51171 11.8022  29
   2   0 -15-7.13113 20.7582   6
   2   0 -14 173.764 41.2357   6
   2   0 -13-15.9276 29.9086   6
   2   0 -12 7182.50 251.651   6
   2   0 -11-8.83198 28.1870   6
   2   0 -10 3287.02 155.091   6
   2   0  -9-28.4141 34.9036  15
   2   0  -9 7.66594 25.3896   6
   2   0  -8 8955.91 379.480   2
   2   0  -8 9980.19 372.396  15
   2   0  -7 8.05240 37.7152   2
   2   0  -7 7.00642 30.3820  15
   2   0  -6 3202.49 167.419  15
   2   0  -5 5.03420 26.2358  15
  -2   0   5-4.98719 24.9712  13
   2   0  -4 28919.2 771.573  12
   2   0  -3 11.7399 27.1282  12
   2   0  -2 6066.90 256.757  14
   2   0  -2 6718.74 243.594  12
   2   0  -1 10.6972 23.9360  14
  -2   0   1 169.739 36.4766   3
  -2   0   0 68.1400 28.9678   3
  -2   0  -1 10.6794 23.2968   9
  -2   0  -1-3.81457 27.2912   1
  -2   0  -2 58471.6 1443.31   1
  -2   0  -2 58345.7 1435.99   9
  -2   0  -3 4.23922 25.9967   9
  -2   0  -4 76531.6 1833.05  10
  -2   0  -4 72636.5 1834.14   9
  -2   0  -5 16.6871 29.5407  10
  -2   0  -5-11.3495 28.9997   9
  -2   0  -6 2056.91 134.371  10
  -2   0  -6 2044.97 133.730   9
  -2   0  -7 22.9385 33.1598  10
  -2   0  -8 1028.87 117.293   8
  -2   0  -9 20.1258 27.5996   6
  -2   0  -9 10.6997 34.5836   8
  -2   0 -10 43231.7 1095.46   6
  -2   0 -11-4.52659 31.0354   6
  -2   0 -12 1881.45 110.228   6
  -2   0 -13 3.94268 29.3365   6
  -2   0 -14 6172.82 206.258   6
  -2   0 -15-11.2926 18.6124   6
   2   1 -15 224.143 30.0836   6
   2  -1 -15 246.026 30.6060   6
   2   1 -14 71.1421 27.7691   6
   2  -1 -14 37.3576 27.5836   6
   2   1 -13 1370.40 87.2329   6
   2  -1 -13 1330.61 87.6665   6
   2   1 -12 3309.37 149.098   6
   2  -1 -12 3332.03 150.495   6
   2  -1 -12 3239.93 149.836  21
   2   1 -11 841.869 74.4514   6
   2  -1 -11 739.062 70.7756   6
   2  -1 -11 784.437 72.8317  21
   2  -1 -10 374.760 48.9645  21
   2  -1 -10 392.241 50.6302   6
   2   1 -10 383.545 49.8624   6
  -2  -1  10 259.032 73.6868   4
   2  -1  -9 30.6729 39.1277  15
   2  -1  -9 88.0867 33.0160   6
   2  -1  -9 3.95630 31.8735  21
   2  -1  -8 426.514 73.8611  15
  -2   1   8 415.337 70.6322  13
  -2   1   7 7741.75 318.653  13
   2  -1  -7 8492.43 327.889  15
   2  -1  -6 724.194 79.4818  15
  -2   1   6 698.366 81.8132  13
   2  -1  -5 424.080 63.7762  15
  -2   1   5 438.633 62.6648  13
   2  -1  -4 3379.29 160.153  12
  -2   1   4 3381.92 161.442  13
   2  -1  -3 6544.79 227.931  12
   2   1  -3 5880.29 209.044  12
  -2  -1   3 6076.02 221.192   3
  -2   1   3 6182.48 224.305   3
   2   1  -2 7050.73 233.095  14
  -2  -1   2 6419.24 225.505   3
   2   1  -2 6454.60 217.693  12
   2  -1  -2 6650.82 232.864  12
   2  -1  -2 6745.98 231.088  14
  -2   1   2 6838.89 229.214   3
  -2   1   2 6867.93 228.427  16
   2   1  -1 904.584 68.0079  14
   2  -1  -1 978.209 70.6729  14
  -2  -1   1 933.631 66.2347   3
  -2   1   1 1031.72 70.5838   3
  -2  -1   0 12317.0 362.550   3
  -2   1   0 13008.6 367.294   3
  -2  -1  -1 1323.42 85.3930   1
  -2  -1  -1 1238.47 88.0324   9
  -2   1  -1 1311.21 84.2035   1
  -2   1  -2 3765.23 170.834   1
  -2  -1  -2 4008.67 166.652   1
  -2  -1  -2 4122.17 179.802   9
  -2  -1  -3 3394.10 162.167   9
  -2  -1  -3 3084.34 139.634  10
  -2   1  -4 5284.72 212.192  10
  -2  -1  -4 5146.41 203.070  10
  -2  -1  -4 5243.26 223.587   9
  -2   1  -5 1926.68 125.657  10
  -2  -1  -5 2153.35 125.459  10
  -2  -1  -5 2286.76 140.984   9
  -2   1  -6 3831.66 195.268  10
  -2  -1  -6 3806.90 189.388  10
  -2  -1  -6 4054.11 206.506   9
  -2  -1  -7 2157.02 149.359   8
  -2   1  -7 1922.09 144.122  10
  -2  -1  -8 851.210 100.500   8
  -2   1  -9 2068.24 110.637   6
  -2  -1  -9 2195.26 111.751   6
  -2   1  -9 2124.40 170.636   8
  -2  -1  -9 2358.28 176.493   8
   2   1  10 9.37793 31.4273  23
  -2   1 -10 39.1434 32.9680   6
  -2  -1 -10-4.29342 28.4399   6
   2   1  11 1667.70 105.547  23
  -2  -1 -11 1696.20 102.464   6
  -2   1 -11 1752.14 104.607   6
  -2  -1 -12 1455.43 93.6393   6
  -2   1 -12 1346.44 91.9451   6
   2   1  12 1331.65 93.4691  23
  -2   1 -13 72.1760 36.0447   6
   2   1  13 75.0973 31.5960  23
  -2  -1 -13 71.4681 33.1143   6
  -2  -1 -14 122.828 30.1929   6
  -2   1 -14 178.444 33.8922   6
   2   1  15 8.31569 15.3233   5
   2  -1  15 8.49298 16.9500   5
   2  -2 -15 306.050 31.0954  21
   2  -2 -14 923.422 64.9140  21
   2  -2 -13 475.299 54.2467  21
   2  -2 -12 133.933 41.4346  21
   2  -2 -11 416.463 54.7486  21
   2  -2 -10 614.054 65.9320  21
   2  -2  -9 3058.13 207.898  15
   2  -2  -9 2978.09 138.719  21
   2   2  -9 2716.74 145.278  26
  -2   2   9 2611.78 196.936  11
   2  -2  -8 1392.86 89.0696  21
   2   2  -8 1591.44 99.4198  26
   2  -2  -8 1661.50 141.255  15
  -2   2   7 1743.37 143.592  13
   2  -2  -7 1731.99 137.782  15
  -2   2   6 394.339 78.3108  13
   2  -2  -6 356.653 72.6413  15
   2  -2  -5 6506.20 262.105  15
  -2   2   5 6687.38 272.613  13
  -2   2   4 3707.12 180.251  13
   2  -2  -3 5732.64 220.603  12
  -2   2   3 5389.39 215.440  16
  -2   2   3 5543.51 221.563  13
   2  -2  -2 16612.9 479.667  12
  -2   2   2 16591.4 480.290  16
   2  -2  -1 102.497 34.3441  12
  -2   2   1 50.1869 30.9810  16
  -2   2   1 78.9702 29.4021   7
  -2   2   0 379.592 54.6913  16
  -2   2   0 273.836 40.3102   7
  -2   2  -1 288.330 41.8920   7
  -2  -2  -1 391.836 56.9441   9
  -2   2  -2 3827.54 167.887   7
  -2  -2  -2 4516.06 197.270   9
  -2  -2  -3 328.138 68.9948   9
  -2   2  -3 580.659 63.9257   7
  -2   2  -4 632.507 69.5749   7
  -2   2  -4 599.827 71.1629  10
  -2  -2  -4 784.606 86.0692   9
  -2   2  -5 3481.64 182.215  10
  -2  -2  -5 3948.48 207.330   9
  -2   2  -5 4135.20 194.070   7
  -2   2  -6 7510.51 304.469  10
  -2  -2  -6 7896.05 326.840   9
  -2   2  -7 2907.74 180.786  10
   2   2   8 339.844 47.2550  30
  -2  -2  -8 391.389 52.4995  21
   2   2   9 3300.81 147.902  30
   2   2   9 3444.50 157.361  23
  -2   2  -9 3023.49 211.136   8
   2   2  10 1262.90 92.9636  23
   2   2  10 1273.18 89.2226  30
   2   2  11 73.3471 34.6729  23
   2   2  11 84.6043 35.1719  30
   2   2  12 1242.93 90.2439  23
   2   2  12 1274.72 85.1171  30
   2   2  13 50.4361 29.4304  23
   2   2  14 77.2497 25.2877  23
   2   2  15 206.494 25.2504  23
   2  -3 -14 693.466 52.6056  21
   2  -3 -13 430.340 50.1628  21
   2  -3 -12 193.706 45.5646  21
   2  -3 -11-4.59502 31.5046  21
   2  -3 -10 601.395 67.2818  21
   2   3 -10 760.588 79.0563  26
   2  -3  -9 844.865 73.4466  21
   2   3  -9 851.900 81.8000  26
   2  -3  -8-10.5339 34.0475  15
   2   3  -8 15.1266 30.4897  26
   2  -3  -8 29.2246 27.9826  21
  -2   3   8 11.1318 37.7359  11
   2   3  -7 1036.80 80.7768  26
   2  -3  -7 1008.00 72.2729  21
   2   3  -7 1065.71 71.3149  20
   2  -3  -7 1070.87 112.765  15
  -2   3   6 545.630 82.5263  13
  -2   3   5 2581.15 164.422  13
  -2   3   4 5723.13 251.273  16
  -2   3   4 5638.17 247.139  13
  -2   3   3 4877.11 226.491  16
  -2   3   3 5136.15 221.530  13
  -2   3   2 980.070 90.2331  16
  -2   3   1 3466.31 166.596   7
  -2   3   1 3136.35 167.494  16
  -2  -3   0 1300.99 104.521   9
  -2   3   0 1256.74 95.5932   7
  -2   3   0 1282.12 100.909  16
  -2  -3  -1 4655.46 219.074   9
  -2   3  -1 5008.44 208.614   7
  -2   3  -1 4707.95 211.623  16
  -2   3  -2 355.139 54.9638   7
  -2  -3  -2 482.638 67.8324   9
  -2   3  -2 370.839 55.6199  16
  -2   3  -3 4253.08 199.876   7
  -2  -3  -3 4423.19 216.392   9
  -2   3  -3 4268.04 198.683  16
  -2  -3  -4 4014.20 217.743   9
  -2   3  -4 4377.07 210.920   7
  -2  -3  -5 1372.01 126.763   9
  -2   3  -5 1193.22 112.438   7
  -2  -3  -6 444.615 76.2632   9
   2   3   7 217.815 40.2006  23
   2   3   7 156.057 38.9844  30
   2   3   7 235.719 43.1686  31
   2   3   8 154.420 38.7043  23
   2   3   8 136.234 37.1762  30
   2   3   9 811.577 75.7021  23
   2   3   9 881.706 74.4708  30
   2   3  10 1745.59 109.490  23
   2   3  10 1675.41 104.450  30
   2   3  11 51.4575 33.8872  23
   2   3  11 171.923 40.9491  30
   2   3  12 1084.60 80.5947  23
   2   3  12 1078.90 76.3959  30
   2   3  13 143.331 32.1443  23
   2   3  13 148.294 32.2567  30
   2   3  14 74.2102 23.7789  23
   2  -4 -14 86.2541 19.0593  21
   2  -4 -13 823.550 57.3826  21
  -2   4  13 728.858 52.5692  30
   2  -4 -12 941.838 69.9881  21
   2  -4 -11 472.188 55.6346  21
   2  -4 -10 1241.11 90.5382  21
  -2   4  10 1382.98 96.4113  28
   2   4 -10 1185.92 99.2385  26
   2   4  -9 69.7427 33.6997  20
  -2   4   9 101.953 38.1999  28
   2   4  -8 17766.7 500.051  20
  -2   4   8 18239.0 519.861  28
   2   4  -8 17938.6 527.720  26
  -2   4   7 1821.56 162.396  11
   2   4  -7 1844.76 101.766  20
  -2   4   7 1739.51 108.038  28
   2   4  -7 1695.92 110.030  26
  -2   4   6 877.483 75.3380  24
  -2   4   6 863.685 73.0216  18
   2   4  -6 846.918 70.9369  20
   2   4  -5 2287.25 111.687  20
  -2   4   5 2381.67 119.216  18
   2   4  -5 2346.77 122.985  29
  -2   4   5 2239.68 115.930  24
  -2   4   3 3142.42 184.785   7
  -2   4   2 66335.5 1664.79   7
  -2   4   2 62029.5 1674.56  16
  -2   4   1 11392.5 405.881   7
  -2   4   1 11290.7 415.978  16
  -2   4   0 40150.1 1093.66   7
  -2   4   0 39974.0 1099.68  16
  -2   4  -1 6348.48 272.222   7
  -2   4  -1 5818.37 267.474  16
  -2   4  -2 11217.1 409.019  16
  -2   4  -2 11142.7 405.833   7
  -2   4  -3 451.058 74.6646   7
  -2   4  -4 107.364 42.9627   7
   2   4   5 9611.24 309.535  31
  -2   4  -5 9683.63 395.852   7
   2   4   6 8951.48 297.103  31
  -2   4  -6 8633.79 381.429   7
   2   4   7 216.450 45.5919  31
   2   4   7 211.182 41.3857  30
   2   4   8 1866.04 115.770  31
   2   4   8 1880.78 114.849  30
   2   4   9 190.150 43.7229  30
   2   4  10 4417.39 179.750  23
  -2   4 -10 4373.48 166.768  20
   2   4  10 4052.84 172.434  30
   2   4  11 143.863 35.5438  23
   2   4  11 162.033 41.9822  30
   2   4  12 962.529 68.4367  30
   2   4  12 1009.88 70.0737  23
   2   4  13 236.180 32.5383  23
   2   4  13 186.823 29.7995  30
  -2   5  13 18.2038 15.0381  30
  -2   5  11 331.778 45.0524  28
  -2   5  10 363.453 51.6464  28
   2   5 -10 351.897 44.7953  20
   2   5 -10 391.079 53.6417  26
   2   5  -9 149.102 42.2288  26
   2   5  -9 32.9870 31.6096  20
  -2   5   9 69.0525 35.8720  28
   2   5  -8 1612.64 97.5032  20
  -2   5   8 1609.76 100.438  18
  -2   5   8 1886.59 113.049  28
   2   5  -8 1706.90 112.354  26
  -2   5   8 1408.97 98.5763  24
  -2   5   7 61.2559 33.0397  24
   2   5  -7 84.4492 36.7828  20
  -2   5   7 40.8555 30.4495  18
  -2   5   7 59.4308 36.5224  28
   2   5  -7 21.6867 39.9781  26
  -2   5   6 182.825 42.2394  24
   2   5  -6 194.806 41.6374  20
  -2   5   6 201.905 41.6203  18
  -2   5   6 131.196 39.3159  28
  -2   5   5-9.12821 27.9890  24
   2   5  -5-15.3465 28.8156  20
  -2   5   5 31.6185 28.4587  18
   2   5  -5-10.0435 30.7954  29
  -2   5   5 60.6170 33.6989  28
  -2   5   4 114.564 34.7235  24
   2   5  -4 160.379 34.8791  20
  -2   5   4 100.676 47.2360   7
   2  -5  -4 118.623 48.1376  17
  -2   5   4 192.430 39.0844  18
   2   5  -4 92.8439 34.3722  29
  -2   5   3 2664.38 191.338   7
   2   5  -3 2457.60 129.282  29
   2  -5  -3 2277.83 179.997  17
  -2   5   3 2434.50 123.958  24
  -2   5   3 2508.10 125.297  18
   2  -5  -2 814.178 104.887  17
  -2   5   2 771.155 66.5385  24
  -2   5   2 824.246 67.0613  18
   2   5  -2 795.213 70.8267  29
  -2   5   2 906.978 108.019   7
  -2   5   1 60.4912 39.9092   7
  -2   5   1 7.94635 23.6800  24
   2   5  -1-4.54341 26.2698  29
  -2   5   0 190.441 59.9571   7
  -2   5   0 249.473 39.9757  24
   2   5   0 211.516 41.4633  29
  -2   5  -1 182.180 54.8195   7
  -2   5  -1 119.404 30.8927  24
   2   5   1 157.354 37.7311  29
  -2   5  -1 83.1724 42.6093  16
  -2   5  -2 206.755 56.9672   7
  -2   5  -2 154.235 35.3596  24
   2   5   2 67.9908 31.8832  29
  -2   5  -3 554.120 91.8650   7
   2   5   3 484.703 58.8238  31
  -2   5  -4 201.102 63.7652   7
   2   5   4 217.079 43.9493  31
   2   5   5 24.4758 30.0243  31
   2   5   6 610.027 67.4749  31
   2   5   7 563.826 66.1727  31
   2   5   8 580.942 66.4492  31
  -2   5  -9 145.834 36.7224  20
   2   5   9 176.720 42.0381  31
   2   5   9 162.284 37.1828  30
   2   5  10 495.168 51.9762  30
  -2   5 -10 452.746 47.8402  20
  -2   5 -11 2584.82 105.427  20
   2   5  11 2552.00 110.978  30
   2   5  12 158.002 27.7109  30
  -2   6  11 541.912 38.8971  30
  -2   6  10 2.98702 22.4352  28
   2   6 -10 15.7099 24.4573  26
  -2   6   9 774.773 67.4961  28
   2   6  -9 928.620 72.2544  26
   2   6  -8 176.051 38.3674  20
  -2   6   8 193.875 43.0181  28
   2   6  -8 213.272 44.4848  26
  -2   6   7 65.7265 34.7039  24
   2   6  -7 43.2696 31.2869  20
  -2   6   7 35.3650 31.9635  28
   2   6  -7 29.3145 33.5123  26
   2   6  -6 787.647 66.8874  20
  -2   6   6 770.763 70.5721  18
  -2   6   6 825.929 72.8272  28
  -2   6   6 837.671 74.8495  24
  -2   6   5 293.311 50.3575  24
   2   6  -5 230.013 42.0959  20
  -2   6   5 285.770 47.9368  18
   2   6  -5 218.283 47.0611  29
  -2   6   4 931.934 77.8128  18
   2   6  -4 999.141 85.1882  29
  -2   6   4 969.445 81.7739  24
  -2   6   3 439.307 57.8652  24
  -2   6   3 330.503 52.7604  18
   2   6  -3 454.745 61.3829  29
   2   6  -2 500.157 61.7277  29
  -2   6   2 538.859 60.0079  24
   2   6  -1 1031.10 85.4130  29
  -2   6   1 928.760 76.2498  24
   2   6   0 61.4275 32.6909  29
  -2   6   0 35.3458 28.5801  24
  -2   6  -1 1115.01 81.8818  24
   2   6   1 1138.58 89.2966  29
   2   6   2 122.176 38.3378  29
   2   6   3 3088.02 149.954  31
   2   6   3 2952.41 148.444  29
   2   6   4 314.277 54.5423  31
   2   6   4 315.383 50.9138  29
   2   6   5 168.006 42.7244  31
   2   6   5 161.324 41.6773  29
  -2   6  -6 163.681 39.5155  20
   2   6   6 232.113 48.3130  31
   2   6   6 112.316 37.8420  29
  -2   6  -7 115.268 34.6954  20
   2   6   7 91.3559 35.9399  31
  -2   6  -8 449.395 49.3822  20
   2   6   8 427.221 53.7408  31
  -2   6  -9 2065.07 96.3651  20
   2   6   9 1983.64 102.656  31
  -2   6 -10 166.622 29.0000  20
  -2   6 -11 131.326 21.7876  20
   2   7  -9 262.038 31.3762  26
   2   7  -8 127.462 29.1586  26
   2   7  -7 90.5113 30.2630  26
  -2   7   6 54.2321 29.1201  24
   2   7  -6 47.6190 29.2704  26
  -2   7   5 649.731 62.3690  24
   2   7  -4 665.771 65.9894  29
  -2   7   4 600.240 61.1816  24
  -2   7   3 96.4352 34.5862  24
   2   7  -3 46.0196 31.5921  29
  -2   7   2 130.607 36.8876  24
   2   7  -2 99.2268 38.1196  29
  -2   7   1 66.7664 31.4098  24
   2   7  -1 124.401 37.9363  29
   2   7   0 968.469 79.5052  29
  -2   7   0 986.308 74.9114  24
   2   7   1 52.4197 33.0559  29
   2   7   2 327.608 49.5955  29
   2   7   3 95.2342 35.6701  29
   2   7   4 157.142 40.0548  31
   2   7   4 172.497 38.8637  29
   2   7   5 834.768 70.7742  31
   2   7   5 868.646 69.5682  29
   2   7   6 22.1711 28.7628  31
   2   7   6-3.59820 23.2595  29
   2   7   7 22.9361 26.1564  31
  -2   7  -7 7.19618 21.5142  20
   2   7   7 3.09153 21.4315  29
  -2   7  -8 180.445 28.2876  20
   2   7   8 192.441 32.2342  31
  -2   7  -9 74.9930 19.1912  20
   2   7   9 99.8732 21.5038  31
  -2   8   6 104.108 21.1955  31
   2   8  -6 66.5384 20.6979  26
  -2   8   5 420.246 41.0125  31
   2   8  -5 521.502 45.1335  26
  -2   8   3 1377.75 75.1215  24
   2   8  -2 776.439 59.5991  29
  -2   8   2 589.110 50.1513  24
   2   8  -1 231.184 36.8998  29
   2   8   0 103.261 30.9211  29
   2   8   1 653.389 55.8739  29
   2   8   2 480.143 48.0088  29
   2   8   2 493.358 48.4674  27
   2   8   3 1451.00 79.9024  29
   2   8   3 1447.83 80.7974  27
   2   8   4 1676.29 83.1048  29
   2   8   4 1785.27 86.4287  27
   2   8   5 2351.13 97.3897  31
   2   8   5 2603.34 100.911  29
   2   8   5 2626.72 103.435  27
   2   8   6 15.0420 15.2722  31
   2   8   6 41.6711 17.7593  27
   2   8   6 43.6280 14.9984  29
   3   0 -15 162.398 22.5269   6
   3   0 -14 31.3903 24.3682   6
   3   0 -13 1418.41 85.8820   6
   3   0 -12 4.02449 27.8977   6
   3   0 -11 827.413 73.3293   6
   3   0 -10-17.5926 31.4688   6
   3   0  -9 5900.65 218.190   6
  -3   0   8-22.5407 36.4299   3
  -3   0   7 3701.11 223.353   3
   3   0  -7 3909.57 215.146  15
   3   0  -6 7.70779 27.2896  15
  -3   0   6-8.86810 27.1912   3
  -3   0   5 834.999 96.3223   3
   3   0  -4 58.2540 36.2345  12
  -3   0   4-28.0179 30.3732   3
  -3   0   3 31908.9 897.918   3
   3   0  -3 34341.8 899.420  12
   3   0  -2-12.2511 32.5315  14
   3   0  -2 5.67217 24.5959  12
  -3   0   2 11.9518 28.6479   3
   3   0  -1 453.425 65.1003  14
  -3   0   1 629.095 81.6742   3
   3   0   0-11.7048 26.7516  14
  -3   0  -1 6127.97 247.242   9
  -3   0  -1 6440.52 258.565   1
  -3   0  -2-33.0040 36.9519   1
  -3   0  -2 23.9454 32.3759   9
  -3   0  -3 843.261 99.8785   9
  -3   0  -3 2220.46 146.559   1
  -3   0  -4 6.58009 28.5333  10
  -3   0  -5 12499.9 431.351  10
  -3   0  -6 8.33888 31.8902  10
  -3   0  -7 3015.75 193.811  10
  -3   0  -8 4.16328 25.5310   6
  -3   0  -9 97.3873 44.3865   6
  -3   0 -10 36.3188 33.4701   6
  -3   0 -11 2664.09 132.454   6
  -3   0 -12 7.98604 29.4299   6
   3   0  13 43.6919 27.4990   5
   3   0  14 2.48920 17.9897   5
   3   0  15 11.9093 12.6416   5
   3   1 -14 949.060 59.5726   6
   3  -1 -14 1081.78 62.7458   6
   3   1 -13 905.832 66.7042   6
   3  -1 -13 951.069 68.9554   6
   3   1 -12 529.102 57.6489   6
   3  -1 -12 615.234 59.8468   6
   3  -1 -12 509.619 55.7791  21
   3  -1 -11 270.096 44.6128  21
   3   1 -11 304.550 48.0514   6
   3  -1 -11 327.597 50.0554   6
   3  -1 -10 66.7701 31.8518  21
   3   1 -10 38.8028 32.0850   6
   3  -1 -10-17.3477 29.4080   6
   3  -1  -9 248.766 43.3890  21
   3   1  -9 308.927 48.0986   6
   3  -1  -9 247.627 45.0013   6
   3  -1  -8 115.340 47.9298  15
  -3  -1   8 56.0375 47.2321   3
   3  -1  -8 23.9761 24.5107  21
  -3   1   8-22.6860 32.7949   3
  -3   1   7 1597.84 141.046  13
   3  -1  -7 1905.07 97.5504  21
  -3  -1   7 1401.22 136.143   3
  -3   1   7 1023.37 121.127   3
   3  -1  -7 1981.22 150.493  15
   3  -1  -6 1953.07 144.128  15
  -3  -1   6 1800.70 143.508   3
  -3   1   6 1526.30 136.628   3
  -3   1   6 1871.10 143.667  13
  -3  -1   5 2330.98 156.251   3
  -3   1   5 2346.05 156.846   3
  -3   1   5 2695.43 165.412  13
  -3  -1   4 479.665 79.6907   3
  -3   1   4 428.440 74.8384   3
   3  -1  -4 226.144 54.6160  12
  -3  -1   3 1345.93 108.734   3
  -3   1   3 1701.51 129.103   3
   3   1  -2 657.454 72.9138  14
   3  -1  -2 742.620 78.2696  14
   3  -1  -2 756.916 77.7481  12
   3   1  -2 727.169 69.9651  12
  -3  -1   2 608.040 70.5528   3
  -3   1   2 602.814 69.6717   3
   3   1  -1 382.335 56.4246  14
   3  -1  -1 443.899 63.4219  14
  -3  -1   1 334.100 54.9706   3
  -3   1   1 360.896 57.4143   3
   3   1   0 87.5819 34.8681  14
   3  -1   0 107.400 38.6335  14
  -3  -1  -1 1285.62 108.067   9
  -3  -1  -1 1199.84 101.536   1
  -3   1  -1 1355.40 107.495   1
  -3  -1  -2 33.2679 33.3252   1
  -3  -1  -2 28.3786 35.5331   9
  -3   1  -2 46.9020 35.5935   1
  -3  -1  -3 15434.9 514.525   9
  -3   1  -3 17008.1 525.101   1
  -3  -1  -3 15843.0 522.574   1
  -3  -1  -4 4338.26 220.516   9
  -3   1  -5 742.226 88.5168  10
  -3  -1  -5 789.287 97.1103   9
  -3   1  -6 1466.49 129.816  10
  -3  -1  -6 1462.85 134.338   9
   3   1   7 856.822 70.6770  23
  -3   1  -7 782.109 99.7727  10
  -3  -1  -7 880.003 107.547   9
   3   1   7 769.043 64.3424  30
  -3  -1  -7 843.487 66.4179   6
  -3   1  -7 877.328 69.7402   6
   3   1   8 139.752 37.5001  23
  -3  -1  -8 73.9586 32.6069   6
  -3   1  -8 121.123 35.7863   6
  -3   1  -8 129.536 52.9596  10
   3   1   8 60.8855 31.4022  30
   3   1   9 5840.90 218.454  23
   3   1   9 5320.66 206.051  30
  -3   1  -9 5695.12 211.059   6
  -3  -1  -9 5572.33 209.966   6
   3   1  10 243.247 44.7384  23
  -3  -1 -10 207.674 41.2498   6
  -3   1 -10 255.606 44.9973   6
   3   1  11 612.292 63.9507  23
  -3   1 -11 668.519 66.3610   6
  -3  -1 -12 548.144 56.0951   6
  -3   1 -12 644.211 60.1239   6
   3   1  12 631.509 60.9607  23
   3   1  13 195.298 36.1624   5
   3  -1  13 214.889 35.4715   5
   3   1  14 36.3506 18.8822   5
   3  -1  14 34.8722 19.4666   5
   3  -2 -14 248.179 30.6141  21
   3  -2 -13 1159.37 74.4188  21
   3  -2 -12 95.0429 33.2028  21
   3  -2 -11 288.413 49.0866  21
   3  -2 -10 1169.35 87.8332  21
   3  -2  -9 12703.4 388.163  21
  -3   2   8 2962.07 212.639  13
   3  -2  -8 3262.20 145.671  21
   3  -2  -8 2899.86 207.752  15
  -3   2   7 1330.42 136.307  13
   3  -2  -7 1479.86 90.1789  21
   3  -2  -7 1337.12 132.286  15
   3  -2  -6 1174.14 116.375  15
  -3   2   6 1132.93 117.622  13
  -3   2   5 4145.75 224.025  13
  -3   2   4 816.059 93.7901  13
   3  -2  -4 852.952 92.8616  12
   3  -2  -3 8320.04 324.370  12
   3  -2  -2 6397.57 266.312  12
  -3   2   2 6696.51 267.334  16
   3  -2  -1 14295.0 461.383  12
  -3   2   1 14550.2 466.773  16
  -3  -2   0 12311.6 430.909   9
  -3   2   0 11997.2 413.644  16
  -3  -2  -1 3066.69 183.842   9
  -3  -2  -2 3652.30 204.609   9
  -3  -2  -3 22463.0 693.484   9
  -3  -2  -4 668.197 93.7300   9
  -3   2  -5 638.514 86.3358  10
  -3  -2  -5 673.759 98.4830   9
  -3   2  -6 735.689 94.3408  10
  -3  -2  -6 750.213 101.472   9
   3   2   7 2855.97 137.537  23
   3   2   7 2831.36 132.231  30
  -3   2  -7 2828.72 194.689  10
  -3  -2  -7 2843.98 207.663   9
   3   2   7 2624.22 135.729  31
   3   2   8 2347.93 126.399  23
   3   2   8 2144.28 116.863  30
   3   2   9 15181.4 454.981  23
   3   2   9 15215.8 445.320  30
   3   2  10 1032.66 84.4936  23
   3   2  10 1169.64 86.0214  30
   3   2  11 3140.18 150.921  23
   3   2  11 3390.44 146.425  30
   3   2  12 51.2029 29.0530  23
   3   2  13 5136.40 179.824  23
   3   2  14 361.674 33.9201  23
   3  -3 -14 14.6349 15.8687  21
   3  -3 -13 883.928 61.0200  21
   3  -3 -12 329.572 46.0691  21
   3  -3 -11 66.6281 33.8170  21
   3  -3 -10 993.024 79.6680  21
   3  -3  -9 3215.47 149.129  21
   3   3  -9 2994.64 155.380  26
   3  -3  -8 88.6718 35.1598  21
   3  -3  -7 240.709 64.7588  15
   3  -3  -7 370.467 49.7417  21
  -3   3   6 32.5478 42.9552  13
  -3   3   6 16.1000 25.0389  18
  -3   3   5 2054.75 164.350  13
  -3   3   5 2280.77 114.026  18
  -3   3   4 1076.24 110.239  13
  -3   3   3 936.859 101.269  13
  -3   3   3 838.668 97.0270  16
  -3   3   2 57.5495 35.6746  16
  -3  -3   1 1953.29 152.771   9
  -3   3   1 1892.77 141.278  16
  -3  -3   0 2445.73 176.323   9
  -3   3   0 2480.33 162.132  16
  -3  -3  -1 740.520 96.4582   9
  -3   3  -1 568.053 80.2985  16
  -3  -3  -2 249.411 61.4739   9
  -3   3  -2 228.441 54.9663  16
  -3  -3  -3 299.942 69.0953   9
  -3   3  -3 465.301 75.3599  16
  -3  -3  -4 442.822 83.9663   9
   3   3   5 387.006 50.6972  23
   3   3   5 487.725 57.3413  31
  -3  -3  -5 462.236 85.8067   9
   3   3   5 492.132 54.3593  30
   3   3   6 934.764 76.7287  23
  -3  -3  -6 979.075 122.869   9
   3   3   6 1032.14 80.8740  31
   3   3   6 1084.59 77.4643  30
   3   3   7 256.949 46.2886  23
   3   3   7 304.897 50.2077  31
   3   3   7 314.642 48.2722  30
   3   3   8 392.222 53.9235  23
   3   3   8 392.361 54.7973  31
   3   3   8 458.896 56.7726  30
   3   3   9 247.969 50.2675  23
   3   3   9 434.235 57.7824  30
   3   3  10 4.64951 31.1633  23
   3   3  10 25.3584 32.8991  30
   3   3  11 1236.62 86.2876  23
   3   3  11 1201.29 80.4939  30
   3   3  12 187.543 35.7596  23
   3   3  13 72.9563 23.7297  23
   3   3  14 33.8086 13.6904  23
   3  -4 -13 249.683 29.1073  21
   3  -4 -12 13.9836 22.8696  21
   3  -4 -11 179.840 35.2380  21
   3  -4 -10 437.539 53.1505  21
  -3   4  10 285.285 46.4221  28
   3  -4  -9 262.566 47.3191  21
  -3   4   9 292.386 54.1033  28
   3   4  -9 353.531 56.8575  26
  -3   4   8-4.91559 28.8617  28
   3   4  -8 25.8961 31.7616  26
  -3   4   7 1785.69 106.499  18
   3   4  -7 1632.83 111.027  26
  -3   4   6 26.9088 27.5095  18
  -3   4   5 2209.52 118.567  18
  -3   4   4 285.251 43.7942  18
   3  -4  -3 899.287 69.6896  22
  -3   4   3 907.600 70.9408  18
  -3   4   3 749.625 102.462  16
  -3   4   3 805.279 66.7746  24
   3  -4  -2 621.040 57.8182  22
  -3   4   2 480.619 55.2304  18
  -3   4   2 476.429 84.0948  16
  -3   4   2 602.082 58.7807  24
  -3   4   1 175.214 61.5996  16
  -3   4   1 210.603 37.7516  24
  -3   4   0 323.814 43.4453  24
  -3   4   0 274.229 66.0411  16
  -3   4  -1 2120.37 108.126  24
  -3   4  -1 2193.38 165.205  16
  -3   4  -2 2443.42 176.260  16
   3   4   3 377.719 51.5226  31
   3   4   4 14.0721 29.5552  31
   3   4   5 83.6698 41.2204  31
   3   4   6 823.690 77.3242  31
   3   4   7 5052.89 207.369  31
   3   4   7 4796.81 190.475  30
   3   4   8 190.656 41.9396  23
   3   4   8 194.962 43.0613  30
   3   4   8 129.584 39.3231  31
   3   4   9 3525.44 155.553  23
   3   4   9 3319.57 148.991  30
   3   4   9 3544.82 158.993  31
   3   4  10 272.153 43.2313  23
   3   4  10 222.274 42.8827  30
   3   4  11-3.34121 22.6521  23
   3   4  12 361.691 37.7147  23
   3   4  13 18.6188 13.0680  23
  -3   5  11 38.9730 22.7066  28
  -3   5  10 1168.21 77.5668  28
  -3   5   9 16.1631 30.3486  28
   3   5  -9-8.47070 29.0384  26
  -3   5   8 4.01319 24.9545  18
  -3   5   8 53.9224 33.4386  28
   3   5  -8 18.8270 32.6305  26
  -3   5   7 167.246 37.5561  18
  -3   5   7 166.444 41.9813  28
   3   5  -7 155.517 43.0645  26
  -3   5   6 792.283 73.0623  18
  -3   5   6 867.450 77.4024  28
   3   5  -6 856.131 79.1440  26
  -3   5   5 18.3034 28.4576  24
  -3   5   5 51.3781 32.7359  18
  -3   5   4 4182.08 179.138  18
  -3   5   4 4232.61 178.276  24
  -3   5   3 285.081 46.7936  24
  -3   5   3 334.015 49.5537  18
  -3   5   2 678.568 64.7822  18
  -3   5   2 789.373 70.1944  24
  -3   5   1 35.3565 33.2036  24
  -3   5   0 1259.18 143.813  16
  -3   5   0 1450.14 93.5355  24
  -3   5  -1 4.36584 27.5068  24
  -3   5  -2 17.5094 29.6794  24
  -3   5  -3 991.157 78.6853  24
   3   5   3 993.950 81.0600  31
  -3   5  -4 969.687 77.1420  24
   3   5   4 636.662 70.5863  31
  -3   5  -5 43.0490 28.5342  24
   3   5   5 50.7817 35.9745  31
   3   5   6 10.1207 35.4730  31
  -3   5  -6 74.9331 32.4208  24
   3   5   7 14.6490 30.7667  31
   3   5   8 256.621 46.1659  31
  -3   5  -9 711.726 56.7590  20
   3   5   9 576.683 58.9114  31
  -3   5 -10 1520.56 77.7407  20
  -3   5 -11 18.2513 18.2819  20
  -3   6  10 82.8566 22.8072  28
  -3   6   9 973.667 64.8636  28
   3   6  -9 1061.67 68.9032  26
  -3   6   8 133.116 34.6222  28
   3   6  -8 85.9359 30.4987  26
  -3   6   7 51.2341 28.2700  24
  -3   6   7 55.1394 27.3841  18
  -3   6   7 57.0654 32.3259  28
   3   6  -7 69.5308 32.1368  26
  -3   6   6 405.502 52.4860  18
  -3   6   6 400.900 52.7428  28
   3   6  -6 394.089 54.4289  26
  -3   6   6 468.151 55.4071  24
  -3   6   5 1445.12 95.0954  18
  -3   6   5 1246.71 89.5149  24
  -3   6   4 5139.09 201.287  18
  -3   6   4 5099.41 202.123  24
  -3   6   3 844.391 74.4934  18
   3   6  -3 1075.49 87.4203  29
  -3   6   3 998.657 82.3529  24
  -3   6   2 14692.3 436.799  24
  -3   6   1 5944.29 224.166  24
  -3   6   0 424.678 56.3143  24
   3   6   0 442.280 60.4420  27
  -3   6  -1 1278.70 90.9074  24
  -3   6  -2 2208.77 124.501  24
  -3   6  -3 5091.31 196.771  24
   3   6   4 11193.4 354.006  31
  -3   6  -4 11284.2 343.889  24
   3   6   5 217.254 43.9289  31
   3   6   6 237.412 44.3842  31
   3   6   6 186.237 41.8682  27
  -3   6  -7 430.041 46.9885  20
   3   6   7 449.375 54.6959  31
  -3   6  -8 259.879 36.0950  20
   3   6   8 259.345 39.9120  31
  -3   6  -9 517.831 42.3272  20
  -3   6 -10 22.1704 16.0309  20
   3   7  -8 68.6260 19.1825  26
   3   7  -7 127.080 27.4022  26
  -3   7   6 117.097 28.8999  24
   3   7  -6 139.236 30.2970  26
  -3   7   5 132.887 33.3511  24
   3   7  -5 208.649 36.7027  26
  -3   7   4 1500.14 89.1180  24
  -3   7   3 933.657 72.4864  24
  -3   7   2 411.350 51.3441  24
   3   7  -2 478.550 52.1469  29
   3   7  -1 806.488 67.3934  29
  -3   7   1 844.885 69.1035  24
  -3   7   0 540.916 56.0837  24
  -3   7  -1 227.816 42.2355  24
   3   7   1 290.268 46.5352  27
   3   7   2 1239.75 85.2433  27
  -3   7  -2 1156.48 77.1324  24
  -3   7  -3 97.5151 31.3970  24
   3   7   3 58.0569 35.8701  27
   3   7   4 119.688 37.3565  27
   3   7   5 596.243 52.7399  31
   3   7   5 560.960 53.6552  27
   3   7   6 437.702 44.0134  31
   3   7   6 454.214 44.8750  27
  -3   7  -7 115.082 22.2093  20
   3   7   7 60.3612 22.3025  31
  -3   7  -8 117.543 18.5732  20
   3   8  -4 317.300 30.8103  26
  -3   8   3-16.5259 15.9415  24
   3   8  -3 2.11396 15.1256  26
  -3   8   2 370.676 37.3492  24
  -3   8   1 127.027 23.7427  24
  -3   8   0 58.6548 19.6507  24
   3   8   0 51.1487 20.7175  19
   3   8   2 722.792 49.3308  27
   3   8   3 12.5346 18.6165  27
   3   8   4 494.336 37.9299  27
   3   8   4 472.704 37.1123  19
   4   0 -14 73.6778 18.5267   6
   4   0 -13-14.9797 19.7684   6
   4   0 -12 152.931 34.9000   6
   4   0 -11 23.1266 28.6848   6
   4   0 -10 14428.3 423.448   6
   4   0  -9 39.5083 33.5875   6
   4   0  -8 7796.81 262.837  21
   4   0  -7-4.02729 23.2846  21
   4   0  -6 948.773 111.007  15
  -4   0   6 657.837 107.105   3
   4   0  -5-9.79302 28.3099  12
  -4   0   5 21.3978 37.8798   3
   4   0  -4 7371.24 318.013  12
  -4   0   4 6344.04 309.229   3
   4   0  -3 8.68949 34.3974  12
  -4   0   3 9.35129 33.1091   3
   4   0  -2 33021.0 929.253  14
   4   0  -2 32479.9 911.368  12
   4   0  -1 8.92910 34.1473  14
   4   0   0 2421.07 169.803  14
  -4   0   0 2727.45 179.813   1
   4   0   1-36.2150 37.0170  14
  -4   0  -1 18.7687 35.8909   1
  -4   0  -2 9801.83 397.164   1
  -4   0  -3 10.2648 36.3437   1
  -4   0  -4 385.827 72.1775  10
   4   0   5-4.04930 26.1750   5
  -4   0  -5 9.71549 34.3980  10
  -4   0  -6 10502.5 419.405  10
   4   0   6 9861.26 318.474   5
   4   0   7 13.4723 28.6652   5
   4   0   8 3066.76 148.193   5
   4   0   9-13.6964 30.9536   5
   4   0  10 3779.88 164.411   5
   4   0  11 11.4903 26.5515   5
   4   0  12 4003.18 152.396   5
   4   0  13 11.6065 18.6831   5
   4   1 -13 144.017 26.4502   6
   4  -1 -13 153.808 27.3735   6
   4  -1 -12 367.011 43.1665  21
   4   1 -12 299.572 40.4453   6
   4  -1 -12 297.601 40.5047   6
   4  -1 -11 210.936 38.9671  21
   4   1 -11 187.219 38.3595   6
   4  -1 -11 204.525 38.8504   6
   4  -1 -10 1465.19 95.1183  21
   4   1 -10 1628.65 98.8276   6
   4  -1 -10 1647.55 99.4619   6
   4  -1  -9 1261.39 90.2663  21
   4   1  -9 1303.62 91.1349   6
   4  -1  -8 4.37944 30.0265  21
   4  -1  -7 255.070 44.0619  21
   4  -1  -6 450.014 77.8838  15
  -4   1   6 476.821 82.9302  13
   4  -1  -6 386.280 48.6486  21
  -4  -1   6 286.756 68.8658   3
  -4   1   6 243.850 67.6530   3
  -4   1   5 1167.05 125.938  13
   4  -1  -5 1334.99 132.174  12
  -4  -1   5 1066.38 122.924   3
  -4   1   5 841.924 109.810   3
   4  -1  -4 19.6129 36.1398  12
  -4  -1   4 9.94916 36.6656   3
  -4   1   4 20.1344 38.5009   3
   4  -1  -3 762.294 96.9246  12
  -4  -1   3 727.971 97.7623   3
  -4   1   3 670.141 96.9358   3
   4   1  -2 335.202 67.2227  14
   4  -1  -2 294.952 67.7255  14
   4  -1  -2 384.610 70.0554  12
   4  -1  -1 779.292 92.9642  14
   4   1  -1 577.954 82.2244  14
  -4   1   0 410.384 72.5408   1
   4   1   0 336.366 66.4865  14
   4  -1   0 415.557 70.9015  14
  -4  -1   0 398.104 76.1231   9
  -4  -1   0 416.154 72.5540   1
   4   1   1 35.9981 34.4177  14
   4  -1   1-18.3897 38.7492  14
  -4  -1  -1 18.8359 37.2818   1
  -4  -1  -1 97.8710 52.9321   9
  -4   1  -1 18.9808 39.9947   1
  -4   1  -2 4967.95 257.649   1
  -4  -1  -2 4210.54 240.284   1
  -4  -1  -2 4319.34 242.973   9
  -4  -1  -3 3579.65 220.321   9
  -4   1  -3 4026.45 233.544   1
   4   1   4 905.208 71.9781  23
  -4   1  -4 910.090 106.383  10
  -4  -1  -4 1159.70 122.108   9
   4   1   5 858.081 72.4520  23
  -4   1  -5 899.013 106.989  10
   4   1   5 926.990 71.6812   5
   4  -1   5 925.313 71.9283   5
   4   1   6 175.063 40.6910  23
   4   1   6 155.993 38.2549   5
   4  -1   6 206.394 39.9859   5
  -4   1  -6 121.073 50.4595  10
   4   1   7 238.055 44.3822  23
   4   1   7 206.465 42.2117   5
   4  -1   7 246.333 44.4615   5
   4   1   8 1169.20 87.1425  23
   4   1   8 1097.46 81.9188   5
   4  -1   8 1059.22 83.0811   5
   4   1   9 2713.54 135.932  23
   4   1   9 2516.46 130.495   5
   4  -1   9 2658.86 133.956   5
   4   1  10 294.895 47.5410  23
   4   1  10 288.701 46.0336   5
   4  -1  10 239.609 46.7057   5
   4   1  11 598.508 57.2742  23
   4   1  11 568.557 55.6817   5
   4  -1  11 657.516 58.7027   5
   4   1  12 184.272 32.3547   5
   4  -1  12 104.656 27.3494   5
   4   1  13 117.478 22.7186   5
   4  -1  13 92.8313 21.8656   5
   4  -2 -13 372.984 36.2173  21
   4  -2 -12 358.426 42.2386  21
   4  -2 -11 104.009 33.1847  21
   4  -2 -10 2390.78 123.222  21
   4  -2  -9 58.1200 36.5799  21
   4  -2  -8-4.51531 29.9083  21
   4  -2  -7 1927.74 110.945  21
   4  -2  -6 581.371 98.4777  15
  -4   2   6 611.983 99.8640  13
   4  -2  -6 613.247 61.3564  21
  -4   2   5 68.1301 44.9526  13
  -4   2   5 16.5926 23.9919  18
  -4   2   4 5232.20 279.571  13
   4  -2  -4 5176.21 196.664  22
   4  -2  -4 4953.69 273.410  12
  -4   2   4 5471.97 198.910  18
   4  -2  -3 1825.12 100.825  22
   4  -2  -3 1762.62 149.256  12
  -4   2   3 1837.27 101.823  18
   4  -2  -2 239.137 59.7242  12
   4  -2  -1 608.302 92.7218  12
  -4  -2   1 743.325 115.861   9
  -4   2   1 488.316 79.3664  16
  -4  -2   0 595.482 96.0754   9
  -4   2   0 661.079 92.7541  16
  -4  -2  -1 6009.75 308.003   9
  -4  -2  -2 1405.96 142.186   9
   4   2   3 634.413 61.5976  23
  -4  -2  -3 696.089 102.778   9
   4   2   4 889.057 75.3307  23
  -4   2  -4 871.696 107.834  10
  -4  -2  -4 914.838 120.412   9
   4   2   5 277.615 45.2108  23
  -4   2  -5 421.312 79.1896  10
  -4  -2  -5 331.880 75.3020   9
   4   2   6 303.133 49.6737  23
   4   2   7 6647.53 246.377  23
   4   2   8 1135.06 87.7423  23
   4   2   9 33.0158 31.2503  23
   4   2  10 90.2933 34.6654  23
   4   2  11 907.956 69.2404  23
   4   2  12 51.3474 23.1720  23
   4   2  13 49.7301 16.5122  23
   4  -3 -13 194.346 24.2279  21
   4  -3 -12 200.366 31.6265  21
   4  -3 -11 958.828 69.6082  21
   4  -3 -10 378.218 49.7234  21
   4  -3  -9 164.795 38.8149  21
   4  -3  -8-13.2068 28.8118  21
   4  -3  -7 1634.39 100.876  21
   4  -3  -6 25.6279 30.5701  21
  -4   3   6 45.0210 28.3773  18
  -4   3   5 1178.42 87.1073  18
  -4   3   4 1426.67 144.698  13
   4  -3  -4 1504.79 98.1155  22
  -4   3   4 1471.92 96.1544  18
  -4   3   3 294.642 72.6337  13
   4  -3  -3 291.892 45.5376  22
   4   3  -3 359.777 51.9141  19
  -4   3   3 291.724 45.7035  18
   4  -3  -2 293.773 43.5285  22
  -4  -3   2 240.488 69.9699   9
   4   3  -2 307.880 48.6137  19
  -4   3   2 236.126 41.3484  18
   4   3  -2 282.216 46.7470  27
  -4   3   2 381.461 72.1329  16
   4  -3  -1 80.5646 31.2658  22
   4   3  -1 19.2305 29.9038  19
  -4  -3   1 24.9738 47.7619   9
  -4   3   1 59.8869 29.4405  18
   4   3  -1 9.19602 29.3634  27
  -4   3   1 53.2069 37.6880  16
   4  -3   0 282.598 41.5926  22
  -4  -3   0 175.067 64.2061   9
   4   3   0 296.689 47.0698  19
   4   3   0 278.019 49.6091  27
  -4   3   0 267.298 66.7624  16
   4  -3   1 703.489 62.9377  22
  -4  -3  -1 446.932 89.1956   9
   4   3   1 726.896 68.3600  27
  -4   3  -1 623.826 95.4534  16
   4   3   2 313.459 49.4607  27
  -4  -3  -2 349.064 77.7976   9
  -4   3  -2 224.737 61.1453  16
   4   3   3 1092.55 81.1208  23
  -4  -3  -3 1079.24 132.962   9
   4   3   3 981.833 80.3315  31
   4   3   3 1052.36 83.1540  27
  -4   3  -3 1271.80 133.226  16
   4   3   4 1163.61 87.0237  23
   4   3   4 1232.21 91.9876  31
  -4   3  -4 1411.19 141.386  16
   4   3   5 1331.58 93.6017  23
   4   3   5 1216.93 92.6506  31
   4   3   6 430.054 56.1022  23
   4   3   7 1089.47 85.5531  23
   4   3   8-18.8241 29.6531  23
   4   3   9 4106.73 172.640  23
   4   3  10 34.7852 27.6637  23
   4   3  11 136.535 31.6217  23
   4   3  12 9.44103 17.5634  23
   4  -4 -12 138.283 21.9073  21
   4  -4 -11 73.6245 23.4575  21
   4  -4 -10 636.260 53.9763  21
  -4   4  10 356.748 44.9110  28
   4  -4  -9 63.5191 30.6304  21
  -4   4   9 46.9946 30.2460  28
  -4   4   7 112.062 34.2203  18
  -4   4   6 1361.33 93.0695  18
  -4   4   5 1299.23 92.6783  18
  -4   4   4 2751.38 140.104  18
   4  -4  -3 3437.27 156.603  22
   4   4  -3 3062.39 153.801  19
  -4   4   3 3060.45 148.743  18
   4   4  -2 113.311 48.1545  19
  -4   4   2 84.6604 44.1322  18
   4  -4  -1 2227.58 120.513  22
  -4   4   1 2341.72 119.688  18
   4   4  -1 2220.09 127.369  27
  -4   4   0 250.937 40.7982  24
   4   4   0 150.755 43.8151  27
   4  -4   0 181.018 39.2354  22
  -4   4  -1 12.9692 32.7902  24
   4  -4   1 103.690 40.9720  22
   4   4   1 60.8433 38.7983  27
  -4   4  -2 21877.7 600.037  24
   4  -4   2 21634.3 599.197  22
   4   4   2 21766.4 613.674  27
   4  -4   3 4359.40 177.557  22
   4   4   3 3985.77 182.285  27
   4   4   4 3415.85 159.884  31
   4   4   4 3238.63 159.475  27
   4   4   5 40.8474 32.1832  31
   4   4   6 1052.56 86.5588  31
   4   4   7 1258.01 87.5735  23
   4   4   8 3648.53 155.911  23
   4   4   9 1763.46 96.3877  23
   4   4  10 2700.74 115.268  23
   4   4  11 222.567 29.1681  23
  -4   5  10 30.0585 19.9248  28
  -4   5   9 326.151 41.1745  28
  -4   5   8 71.1090 27.8851  18
  -4   5   8 72.1105 30.6551  28
  -4   5   7 75.4132 29.9105  18
  -4   5   7 88.9505 34.8706  28
  -4   5   6 2250.56 118.023  18
  -4   5   6 1948.57 112.484  28
  -4   5   5 57.0645 33.8973  18
  -4   5   4 274.414 44.7906  18
  -4   5   3 1147.45 85.7911  18
  -4   5   3 1073.57 81.6298  24
   4  -5  -2 3755.51 164.261  22
   4   5  -2 4037.74 180.152  19
  -4   5   2 3674.87 162.472  18
  -4   5   2 3596.31 162.428  24
  -4   5   1 76.4949 35.6361  24
   4   5  -1 4.91375 36.2278  27
  -4   5   0 67.4822 32.5544  24
   4   5   0 75.7901 39.3630  27
  -4   5  -1 2021.35 114.610  24
   4   5   1 1968.70 120.755  27
  -4   5  -2 1660.38 103.700  24
   4   5   2 1591.00 109.950  27
  -4   5  -3 212.980 43.7542  24
   4   5   3 194.890 47.8730  27
  -4   5  -4 385.214 51.2801  24
   4   5   4 368.268 52.6057  31
   4   5   4 301.696 51.9731  27
  -4   5  -5 1021.70 77.6375  24
   4   5   5 946.820 77.9172  31
   4   5   5 1001.49 80.3881  27
  -4   5  -6 470.055 54.4188  24
   4   5   6 495.021 59.4262  31
  -4   5  -7 24.1967 25.4824  24
  -4   5  -8 2.95008 19.3066  24
  -4   5  -9 181.386 28.0379  24
  -4   5  -9 184.758 29.3524  20
  -4   5 -10 59.7055 18.2688  20
  -4   6   8 82.5093 23.2676  28
  -4   6   7 454.369 43.7809  18
  -4   6   7 318.280 39.4314  28
  -4   6   6 6.32721 20.9551  18
  -4   6   6 3.06942 24.0970  28
  -4   6   5 306.117 41.4551  18
  -4   6   4 3.65616 23.9274  24
  -4   6   4-7.33254 25.4145  18
  -4   6   3 410.934 50.3851  24
  -4   6   3 339.468 46.3961  18
  -4   6   2 28.1218 29.6091  24
   4   6  -2-12.9341 30.5290  19
  -4   6   1 4.10400 26.5299  24
   4   6  -1-27.2330 28.9715  19
  -4   6   0 98.5562 33.6950  24
   4   6   0 156.105 40.7170  27
  -4   6  -1 223.226 41.5118  24
   4   6   1 158.876 43.0206  27
  -4   6  -2 331.446 47.7879  24
   4   6   2 415.674 55.7825  27
  -4   6  -3 293.585 44.0110  24
   4   6   3 269.965 48.2586  27
  -4   6  -4 126.947 32.4639  24
   4   6   4 233.021 40.6615  19
   4   6   4 161.352 37.7128  27
   4   6   5 397.788 49.2715  27
  -4   6  -5 512.543 49.1450  24
  -4   6  -6 401.780 41.5788  24
  -4   6  -7 539.503 42.8245  20
  -4   6  -7 579.603 44.4131  24
  -4   6  -8 493.914 36.9204  20
  -4   7   5 228.214 28.3571  24
  -4   7   4 513.804 43.6993  24
  -4   7   3 847.549 58.9460  24
  -4   7   2 76.9174 25.2780  24
  -4   7   1-5.85070 23.3519  24
   4   7  -1 12.1877 22.2396  19
  -4   7   0 11.7275 21.1898  24
   4   7   0-3.18748 22.3352  19
   4   7   0 17.0308 20.7189  27
  -4   7  -1 105.802 28.2662  24
   4   7   1 76.7032 27.8001  19
   4   7   1 97.2248 28.8053  27
   4   7   2 405.520 43.9803  19
   4   7   2 388.291 43.1452  27
  -4   7  -2 376.399 40.2545  24
  -4   7  -3 42.2062 22.8469  24
   4   7   3 14.0810 20.5659  19
   4   7   3 33.1582 24.6291  27
   4   7   4 276.529 32.6178  19
   4   7   4 257.812 34.2591  27
  -4   7  -4 260.517 30.4728  24
   4   7   5 362.728 35.0463  27
   5   0 -12-2.01267 16.3276   6
   5   0 -11 551.692 48.7208   6
   5   0 -10 36.9955 26.8607   6
   5   0  -9 169.194 38.1018   6
   5   0  -8-3.94214 27.0282  21
   5   0  -7 1798.35 104.417  21
   5   0  -6-8.54738 26.5701  21
   5   0  -5 1106.41 90.5819  19
   5   0  -4-5.21830 27.7165  19
   5   0  -4 59.9957 36.7940  25
   5   0  -3 939.623 116.919  12
   5   0  -3 972.748 82.3902  19
   5   0  -3 858.039 73.3385   5
   5   0  -3 961.780 89.4738  25
   5   0  -2-16.8537 25.8396   5
   5   0  -2-22.8068 36.8572  12
   5   0  -2 5.13327 29.2125  19
  -5   0   2-12.9785 43.9953   1
   5   0  -2-5.96965 31.7046  25
  -5   0   1 4615.23 282.687   1
   5   0  -1 5119.77 288.195  14
   5   0  -1 4317.33 261.612  12
   5   0  -1 4933.53 200.223  19
   5   0  -1 4664.74 186.348   5
   5   0  -1 4532.44 206.197  25
   5   0   0 12.3090 39.7833  14
   5   0   0-4.20592 28.1888   5
   5   0   0 19.7200 30.2328  19
  -5   0   0 38.3446 43.3270   1
   5   0   0-5.78857 31.3062  25
   5   0   1 6756.48 347.873  14
  -5   0  -1 6524.49 349.200   1
   5   0   1 6692.32 238.421   5
   5   0   1 6938.75 260.461  25
   5   0   2-12.6644 34.2475  14
   5   0   2-13.0711 27.4528   5
   5   0   3 146.452 42.4426   5
   5   0   4 4.52042 30.6468   5
   5   0   5 1954.68 112.299   5
   5   0   6-4.58067 27.6976   5
   5   0   7 10647.3 337.927   5
   5   0   8 29.5664 32.8840   5
   5   0   9 68.6944 31.0003   5
   5   0  10-9.76916 24.2309   5
   5   0  11 331.340 36.6116   5
   5   0  12 8.95299 13.5740   5
   5   1 -12 984.739 53.3131   6
   5  -1 -12 1209.20 58.3300   6
   5  -1 -11 117.049 25.9157  21
   5   1 -11 126.714 26.2983   6
   5  -1 -11 106.275 26.7611   6
   5   1 -10 928.485 65.6915   6
   5  -1 -10 994.696 67.5444   6
   5  -1 -10 929.007 66.4077  21
   5  -1  -9 974.152 73.4850  21
   5   1  -9 818.433 68.3563   6
   5  -1  -9 970.257 72.8843   6
   5  -1  -8 388.927 52.3948  21
   5  -1  -7 26.0073 30.3777  21
   5  -1  -6 154.902 39.8535  21
  -5   1   5 1610.41 100.467  18
   5   1  -4 1256.65 94.3322  19
  -5   1   4 1208.36 86.5581  18
   5   1  -4 1356.22 103.483  25
   5  -1  -3 206.290 46.8254  19
   5   1  -3 260.489 48.5257  19
   5   1  -3 246.051 51.9708  25
   5   1  -2 107.601 33.1147   5
   5  -1  -2 101.187 34.5486   5
   5  -1  -2 119.862 52.0252  12
   5  -1  -2 114.701 38.4935  19
   5   1  -2 51.8232 36.7673  19
   5  -1  -2 120.623 42.7677  25
   5   1  -2 90.1556 38.4307  25
   5   1  -1 84.6454 41.0082  14
   5  -1  -1 12.3265 35.6546  14
   5   1  -1 94.7214 32.8973   5
   5  -1  -1 67.1783 30.9687   5
  -5  -1   1 25.4835 46.9704   1
   5  -1  -1 35.6638 36.4710  12
   5  -1  -1 25.5001 29.5117  19
   5   1  -1 71.7472 35.1577  19
  -5  -1   1-13.0846 55.1528   9
   5  -1  -1 71.0119 35.2878  25
   5   1  -1 83.7174 37.1962  25
  -5  -1   0 139.788 55.1916   1
   5   1   0 182.092 59.5834  14
   5  -1   0 173.407 60.7913  14
   5   1   0 132.224 34.7057   5
   5  -1   0 84.3055 32.1000   5
  -5   1   0 115.417 52.5190   1
   5  -1   0 179.875 60.1223  12
   5  -1   0 84.3664 34.1654  19
   5   1   0 186.202 42.2147  19
   5  -1   0 161.622 43.0603  25
   5   1   0 159.922 42.9176  25
   5   1   1 73.4750 46.8810  14
   5  -1   1 100.032 54.2637  14
   5   1   1 79.7497 31.3069   5
   5  -1   1 132.811 36.1735   5
   5   1   1 93.5300 33.4442  19
  -5  -1  -1 64.1219 47.3091   1
   5   1   1 105.161 38.2960  25
   5   1   2 112.193 54.1634  14
   5  -1   2 178.376 59.7737  14
   5   1   2 145.084 35.0583   5
   5  -1   2 156.860 35.5129   5
   5   1   3 115.669 36.9633  23
   5   1   3 130.106 37.7110   5
   5  -1   3 110.820 35.7787   5
   5   1   4 111.998 39.0255  23
   5   1   4 145.445 39.9350   5
   5  -1   4 198.093 41.3024   5
   5   1   5 492.879 61.1518  23
   5   1   5 493.463 57.3684   5
   5  -1   5 508.636 59.6488   5
   5   1   6 1107.20 85.0204  23
   5   1   6 1139.45 82.8166   5
   5  -1   6 1051.24 82.0096   5
   5   1   7 314.733 49.1408  23
   5   1   7 356.392 49.3365   5
   5  -1   7 381.665 52.7176   5
   5   1   8 776.394 68.2071  23
   5   1   8 776.792 67.4968   5
   5  -1   8 728.088 67.5888   5
   5   1   9 1107.91 77.4681  23
   5   1   9 1192.40 77.8066   5
   5  -1   9 1134.91 78.1217   5
   5   1  10 181.716 34.3135   5
   5  -1  10 186.225 34.7201   5
   5   1  11 11.7165 19.4595   5
   5  -1  11 14.4871 18.3042   5
   5   1  12 12.4005 13.1609   5
   5  -1  12 1.62165 13.8681   5
   5  -2 -12-8.25632 14.2220  21
   5  -2 -11 2175.04 94.6694  21
   5  -2 -10 1438.49 82.5018  21
   5  -2  -9 2069.54 107.748  21
   5  -2  -8 28.3107 29.8151  21
   5  -2  -7 264.864 46.4063  21
   5  -2  -6 1038.35 81.0735  21
  -5   2   6 1150.66 83.0900  18
   5  -2  -5 1084.53 82.3842  21
  -5   2   5 1209.89 88.4111  18
   5  -2  -4 8605.75 289.139  22
   5   2  -4 8674.14 301.303  19
  -5   2   4 8780.88 293.400  18
   5  -2  -3 1564.00 99.0774  22
   5   2  -3 1472.49 104.922  19
  -5   2   3 1551.25 99.1098  18
   5   2  -3 1510.22 110.845  25
   5  -2  -2 177.046 40.7373  22
   5   2  -2 222.185 49.4957  19
  -5   2   2 242.885 47.5512  18
   5  -2  -1 2099.85 114.468  22
   5   2  -1 1998.10 122.439  19
  -5   2   1 1795.57 109.476  18
   5  -2   0 500.355 57.2757  22
   5   2   0 599.906 67.0000  19
  -5   2   0 599.518 60.9005  18
   5  -2   1 13920.0 415.086  22
   5   2   1 13710.8 424.734  19
   5   2   2 7194.16 259.434  19
   5   2   3 4735.34 196.899  23
   5   2   4 1456.61 102.613  23
   5   2   5 3218.26 153.904  23
   5   2   6-14.4486 33.7482  23
   5   2   7 362.334 52.0284  23
   5   2   8 214.572 41.7638  23
   5   2   9 2431.81 116.798  23
   5   2  10 72.0474 25.1694  23
   5   2  11 372.702 35.4478  23
   5  -3 -11 46.8404 17.9852  21
   5  -3 -10-2.64299 19.8505  21
   5  -3  -9 89.0968 28.7965  21
   5  -3  -8 224.048 41.1218  21
   5  -3  -7 105.174 35.2321  21
  -5   3   7 89.6594 31.4510  18
   5  -3  -6 3040.55 138.148  21
  -5   3   6 2788.90 137.410  18
   5  -3  -5 32.9809 28.8875  21
  -5   3   5-9.07648 28.5936  18
   5   3  -4 419.732 56.7021  19
  -5   3   4 381.911 53.3831  18
   5  -3  -3 2533.32 135.166  22
   5   3  -3 2890.44 146.821  19
  -5   3   3 2749.02 137.639  18
   5  -3  -2 522.091 61.4265  22
   5   3  -2 560.454 66.4098  19
  -5   3   2 534.847 59.7854  18
   5  -3  -1 249.502 49.9970  22
   5   3  -1 182.884 47.5313  19
  -5   3   1 193.082 43.3143  18
   5  -3   0 2056.45 116.535  22
   5   3   0 1638.78 111.927  19
   5  -3   1 6711.81 245.461  22
   5   3   1 6697.80 253.247  19
   5  -3   2 440.017 56.5437  22
   5   3   2 492.079 62.2477  19
   5  -3   3 4.76110 29.9971  22
   5   3   4 991.739 79.6806  23
   5   3   5 1745.28 107.157  23
   5   3   6 62.4709 31.9571  23
   5   3   7 586.427 59.5344  23
   5   3   8 632.783 58.7842  23
   5   3   9 1320.42 77.9029  23
   5   3  10 44.7779 20.9918  23
   5   3  11 102.792 18.9268  23
  -5   4  10 17.7444 15.8158  28
  -5   4   9-20.6195 23.2704  28
  -5   4   8 16.1734 23.3802  28
  -5   4   7 353.818 44.1916  18
  -5   4   6 413.187 49.2706  18
  -5   4   5 333.863 47.9293  18
  -5   4   4 1345.40 91.9302  18
   5   4  -3 77.8294 36.5610  19
  -5   4   3 48.6412 30.6847  18
   5  -4  -2 18.6861 25.2647  22
   5   4  -2-5.08767 29.8712  19
  -5   4   2-8.77228 25.7524  18
   5  -4  -1 23.4406 27.9525  22
   5   4  -1 20.8016 32.3420  19
  -5   4   1 63.9578 28.5897  18
   5  -4   0 920.813 77.4099  22
   5   4   0 908.035 82.0582  19
   5  -4   1 268.328 43.1431  22
   5   4   1 375.417 56.8107  19
  -5   4  -2 12.4653 24.7634  24
   5  -4   2 4.54607 23.2325  22
   5   4   2 4.97401 30.0764  19
   5   4   2 9.83273 34.0805  27
  -5   4  -3 997.968 75.6570  24
   5  -4   3 1049.61 79.5303  22
   5   4   3 1090.43 83.7181  19
   5   4   3 920.797 80.3963  27
  -5   4  -4 376.912 51.6837  24
   5  -4   4 399.562 52.3602  22
  -5   4  -5 124.206 33.6516  24
   5  -4   5 227.727 39.3580  22
  -5   4  -6 361.227 46.6488  24
   5   4   6 432.194 49.1877  23
   5  -4   6 354.037 44.3796  22
  -5   4  -7 181.186 33.9632  24
   5   4   7 160.233 32.4820  23
   5  -4   7 182.586 31.9967  22
  -5   4  -8 8.26389 18.4641  24
   5   4   8 16.7988 18.5473  23
  -5   4  -9 41.4268 18.5487  24
   5   4   9 62.3818 20.0162  23
  -5   4 -10 411.446 30.7846  24
  -5   5   8 567.353 40.5780  18
  -5   5   8 487.373 41.0569  28
  -5   5   7 218.892 31.0500  18
  -5   5   7 199.488 32.4942  28
  -5   5   6 6.03405 20.6884  18
  -5   5   6 27.7672 23.5999  28
  -5   5   5-3.36158 22.7909  18
  -5   5   5 20.1002 24.2115  28
  -5   5   4 225.814 39.1193  18
   5   5  -3 143.973 36.9165  19
  -5   5   3 125.386 32.7876  18
   5   5  -2 302.011 47.0997  19
  -5   5   2 256.990 40.2179  18
   5  -5  -1 43.7721 28.2136  22
   5   5  -1 89.9021 35.0181  19
   5  -5   0 534.575 57.4398  22
   5   5   0 687.515 67.8593  19
  -5   5   0 584.169 57.8896  24
  -5   5  -1 33.8772 26.3759  24
   5  -5   1-3.87506 22.7528  22
   5   5   1 8.97778 29.3780  19
  -5   5  -2 207.972 37.7207  24
   5  -5   2 216.494 38.2910  22
   5   5   2 232.539 42.7418  19
  -5   5  -3 125.761 33.8173  24
   5   5   3 159.975 36.2490  19
  -5   5  -4 2554.93 118.220  24
  -5   5  -5 128.399 31.8245  24
  -5   5  -6 5.54576 19.2219  24
  -5   5  -7 984.063 58.1623  24
  -5   5  -8 498.265 36.2904  24
  -5   6   5 15.0306 15.3662  18
  -5   6   4-2.36704 16.9349  18
  -5   6   3 78.8098 22.7273  18
   5   6  -2 182.147 31.9940  19
  -5   6   1 162.354 31.5902  24
   5   6  -1 183.293 34.8529  19
  -5   6   0 88.8264 25.9950  24
   5   6   0 148.831 31.8168  19
   5   6   1 881.463 65.6665  19
  -5   6  -1 839.885 59.7739  24
   5   6   2 324.668 40.9775  19
  -5   6  -2 351.133 38.7109  24
  -5   6  -3 49.4621 22.2941  24
   5   6   3 55.7398 22.4618  19
  -5   6  -4 30.5122 18.5950  24
  -5   6  -5 205.999 26.9380  24
  -5   6  -6 527.078 36.0842  24
   6   0 -10 149.372 23.1107   6
   6   0  -9 2.45395 19.1011   6
   6   0  -8 30.4661 21.3905  21
   6   0  -8 50.5103 24.8730   6
   6   0  -7 6.47810 24.3276  21
   6   0  -6 5738.79 202.887  21
  -6   0   4 1949.14 108.987  18
   6   0  -3 10.4542 34.2090  19
   6   0  -2 1908.10 120.447  19
   6   0  -2 1820.56 127.139  25
   6   0  -1-5.27285 36.1517  19
   6   0  -1 12.3024 36.6586  25
   6   0  -1-4.37404 32.8517   5
   6   0   0 14773.4 459.451  19
   6   0   0 15801.6 450.901   5
   6   0   0 15482.4 480.761  25
   6   0   1 43.8094 33.2231   5
   6   0   1 46.7139 34.8151  25
   6   0   2 20588.0 571.031   5
   6   0   3-21.5196 30.4804   5
   6   0   4 662.501 65.8006   5
   6   0   5-3.98827 26.7300   5
   6   0   6 11.1393 29.6412   5
   6   0   7 13.2953 22.7908   5
   6   0   8 1457.16 78.5659   5
   6   0   9-4.54433 18.4329   5
   6   0  10 48.3172 15.9985   5
   6  -1 -10 30.2439 15.7646  21
   6   1 -10 49.8171 16.3667   6
   6  -1 -10 36.8810 16.0979   6
   6   1  -9 484.561 40.7522   6
   6  -1  -9 627.334 45.7121  21
   6  -1  -9 552.553 43.6440   6
   6  -1  -8 128.160 28.8562  21
   6   1  -8 90.9985 27.3348   6
   6  -1  -8 166.783 30.1662   6
   6  -1  -7 336.982 43.1624  21
   6  -1  -6 2387.16 116.380  21
   6  -1  -5 939.834 72.9925  21
   6   1  -5 871.271 75.1453  19
  -6   1   5 1019.29 76.3570  18
   6   1  -4 1190.25 91.1702  19
  -6   1   4 1187.71 84.1365  18
   6   1  -4 1094.00 94.0973  25
   6   1  -3 855.884 78.6802  19
  -6   1   3 924.542 74.8926  18
   6   1  -3 907.530 85.7762  25
   6   1  -2 250.811 49.6656  19
  -6   1   2 308.460 47.9516  18
   6   1  -2 285.091 54.7893  25
   6   1  -1 1033.45 87.4551  19
  -6   1   1 929.913 78.1537  18
   6   1  -1 1023.33 79.6388   5
   6  -1  -1 1105.93 82.7591   5
   6   1  -1 1064.49 94.2863  25
   6   1   0 4139.88 182.943  19
  -6   1   0 4011.36 171.374  18
   6   1   0 4111.04 171.322   5
   6  -1   0 4408.95 177.114   5
   6   1   0 3800.86 188.616  25
   6   1   1 924.985 79.1872  19
   6   1   1 959.102 76.1077   5
   6  -1   1 959.401 77.8241   5
   6   1   1 896.924 86.3271  25
   6   1   2 95.8994 33.0673   5
   6  -1   2 132.248 36.7912   5
   6   1   2 33.7610 33.5904  25
   6   1   3 753.128 67.3168   5
   6  -1   3 737.354 68.6667   5
   6   1   4 766.372 66.5674   5
   6  -1   4 849.846 69.7974   5
   6   1   5 83.0958 34.3536   5
   6  -1   5 65.7922 29.3834   5
   6   1   6 205.169 38.0328   5
   6  -1   6 171.963 39.1676   5
   6   1   7 1335.87 76.9879   5
   6  -1   7 1190.63 75.5556   5
   6   1   8 39.2144 20.3780   5
   6  -1   8 56.5555 22.5565   5
   6   1   9 101.668 21.6376   5
   6  -1   9 111.762 22.3256   5
   6  -2  -9 122.421 24.4101  21
   6  -2  -8 59.1703 23.5263  21
   6  -2  -7 548.548 51.1487  21
   6  -2  -6 41.3582 28.8460  21
  -6   2   6 34.2310 22.9579  18
   6  -2  -5 132.872 35.3417  21
  -6   2   5 153.504 34.1292  18
   6  -2  -4 274.315 42.4445  21
   6   2  -4 200.343 40.0608  19
  -6   2   4 267.349 44.9538  18
   6   2  -4 128.527 39.2740  25
   6   2  -3 348.664 52.9166  19
  -6   2   3 294.683 46.8028  18
   6   2  -3 343.692 55.4436  25
   6   2  -2 550.725 62.0363  19
  -6   2   2 514.941 58.8407  18
   6   2  -2 567.093 68.0727  25
   6  -2  -1 501.173 55.5519  22
   6   2  -1 465.255 61.1249  19
  -6   2   1 395.010 50.6743  18
   6   2  -1 401.399 61.7711  25
   6  -2   0 2398.22 123.886  22
   6   2   0 2313.40 131.110  19
  -6   2   0 2548.69 125.077  18
   6   2   0 2579.56 145.668  25
   6  -2   1 12.7892 23.4672  22
   6   2   1 14.5065 29.2409  19
   6   2   1 28.8246 32.2748  25
   6  -2   2 152.356 34.4547  22
   6   2   2 93.7947 37.5176  25
   6  -2   3 12.4395 24.7132  22
   6  -2   4-11.9807 22.3579  22
   6  -2   5 1328.01 83.2375  22
   6  -2   6 1717.56 92.6674  22
   6  -2   7 983.971 65.0225  22
   6  -2   8 12.5591 17.0315  22
   6  -2   9-1.92108 12.7248  22
   6  -3  -8 304.547 32.1501  21
  -6   3   8 152.241 26.9511  28
   6  -3  -7 186.606 29.2243  21
  -6   3   7 237.917 30.8877  18
   6  -3  -6 11.3879 22.9137  21
  -6   3   6 15.1105 21.8431  18
   6  -3  -5 232.052 35.8448  21
  -6   3   5 284.964 39.5185  18
   6   3  -4 87.0187 31.1017  19
  -6   3   4 66.8564 27.6921  18
   6   3  -3 363.005 51.1540  19
  -6   3   3 437.857 49.4869  18
   6   3  -3 360.557 53.2292  25
   6  -3  -2 8.02347 24.6022  22
   6   3  -2-31.8254 29.7546  19
  -6   3   2 7.85379 25.3845  18
   6   3  -2-20.8040 30.0709  25
   6  -3  -1 361.445 47.9316  22
   6   3  -1 371.087 53.5168  19
  -6   3   1 414.073 50.1736  18
   6   3  -1 371.341 56.7761  25
   6  -3   0 70.2727 29.9194  22
   6   3   0 55.4044 34.3932  19
   6   3   0 92.2488 38.8574  25
   6  -3   1 28.7939 24.9090  22
   6   3   1 102.974 34.8754  19
   6   3   1 74.6703 37.3964  25
   6  -3   2 269.742 41.7284  22
   6   3   2 202.364 40.5766  19
   6   3   2 260.349 47.8602  25
   6  -3   3 674.221 61.3388  22
   6   3   3 851.842 74.7233  25
   6  -3   4 2040.88 105.134  22
   6  -3   5-6.72025 21.1707  22
   6  -3   6 262.448 35.1471  22
  -6   3  -7-2.19149 16.6112  24
   6  -3   7-2.52181 16.0962  22
  -6   3  -8 6.96546 12.8353  24
   6  -3   8 7.91976 11.9731  22
  -6   4   7 23.3097 14.2119  18
  -6   4   7 40.1456 18.0155  28
  -6   4   6 88.3387 22.7571  18
  -6   4   5 334.547 38.4918  18
  -6   4   4 1314.75 76.9757  18
   6   4  -3 93.5833 28.8844  19
  -6   4   3 119.690 29.0773  18
   6   4  -2 284.626 42.4947  19
  -6   4   2 213.546 35.7011  18
   6   4  -2 265.064 44.8508  25
   6  -4  -1 77.8755 27.8503  22
   6   4  -1 54.3633 30.2811  19
   6   4  -1 120.208 37.0130  25
   6  -4   0 437.888 48.6968  22
   6   4   0 497.863 54.4546  19
   6   4   0 504.361 57.7422  25
   6  -4   1 56.0772 25.3922  22
   6   4   1 83.0109 30.1726  19
   6   4   1 107.697 34.0600  25
   6  -4   2 6.76385 20.7395  22
   6   4   2 3.52683 23.6374  19
   6   4   2 4.28229 25.1429  25
   6  -4   3 3.18991 20.8760  22
   6   4   3-7.85234 24.4089  25
   6  -4   4 1169.75 69.8848  22
  -6   4  -5 70.3939 20.4273  24
   6  -4   5 66.9581 20.6187  22
  -6   4  -6 307.216 31.2491  24
   6  -4   6 320.953 31.9677  22
  -6   4  -7 1021.76 49.7091  24
   6  -4   7 837.112 47.0009  22
  -6   5   5 15.2579 13.5376  18
  -6   5   4 134.699 22.4346  18
   6   5  -3 29.3056 17.7113  19
  -6   5   3 31.2182 16.7636  18
   6   5  -2 49.1405 21.0120  19
   6   5  -1 22.1152 20.1773  19
   6   5  -1-18.5044 20.9087  25
   6   5   0 365.094 39.9750  19
   6   5   0 335.349 40.9025  25
   6   5   1 375.119 40.7535  19
   6   5   1 394.627 45.3548  25
   6  -5   2 583.118 43.8519  22
   6   5   2 618.096 47.6107  19
   6   5   2 631.701 53.2621  25
   6  -5   3 82.2846 20.4871  22
   6   5   3 97.6120 24.0870  25
  -6   5  -4 133.929 21.2083  24
   6  -5   4 163.721 21.6282  22
   6   5   4 141.537 24.2647  25
   7   0  -7 112.379 19.5185   6
   7   0  -6-13.2098 16.7062  21
   7   0  -5 133.986 24.9745  21
   7   0  -4-7.73574 20.2450  21
  -7   0   4 31.6981 19.4701  18
  -7   0   3 23.5201 20.6076  18
  -7   0   2-12.5242 19.7290  18
  -7   0   1 538.006 50.8550  18
  -7   0   0 22.2126 22.9388  18
  -7   0  -1 326.629 38.6019  18
  -7   0  -2 5.52292 18.2927  18
   7   0   2-29.3326 22.0318   5
   7   0   3 286.433 34.9916   5
   7   0   4-15.0700 20.3785   5
   7   0   5 39.6888 19.1442   5
   7   0   6 1.82818 13.3439   5
   7  -1  -6 19.4382 15.3977  21
   7   1  -6 21.2548 15.1551   6
   7  -1  -6 27.7897 16.6237   6
   7  -1  -5 75.5220 22.3837  21
  -7   1   5 78.3704 21.7838  18
   7  -1  -4 2011.35 89.0851  21
  -7   1   4 1754.29 85.7899  18
   7  -1  -3 137.840 28.4281  21
  -7   1   3 100.925 27.1282  18
  -7  -1   3 93.9359 24.5835  18
  -7   1   2 816.972 59.8291  18
  -7  -1   2 817.966 59.3022  18
  -7   1   1 945.022 64.3703  18
  -7  -1   1 874.500 62.6163  18
  -7   1   0 1726.17 88.1113  18
  -7   1  -1 237.211 32.2308  18
   7   1   2 1882.36 88.3135   5
   7  -1   2 1722.60 86.9501   5
   7  -1   3 10.4448 20.6783   5
   7   1   3 32.9345 21.9764   5
   7   1   4 958.794 57.4472   5
   7  -1   4 1032.88 59.7948   5
   7   1   5 43.5288 18.8649   5
   7  -1   5-2.05605 16.1444   5
   7   1   6 50.9462 15.1479   5
   7  -1   6 65.1972 16.7060   5
   7  -2  -6 963.744 49.1964  21
   7  -2  -5 179.440 25.5997  21
  -7   2   5 203.060 25.5527  18
   7  -2  -4 139.949 25.3872  21
  -7   2   4 136.025 24.8834  18
   7  -2  -3 333.493 35.8631  21
  -7   2   3 347.445 37.0617  18
  -7  -2   3 319.109 33.9520  18
   7  -2  -2 48.8832 23.3642  21
   7   2  -2 81.1503 28.5844  19
  -7   2   2 102.094 26.2514  18
   7  -2  -1 1781.85 83.6800  21
   7   2  -1 1793.43 92.3077  19
  -7   2   1 1668.61 83.9979  18
   7   2  -1 1688.05 97.0443  25
   7   2   0 2679.72 116.931  19
  -7   2   0 2614.65 107.894  18
   7   2   0 2740.11 125.561  25
   7   2   1 2579.33 110.511  19
   7   2   1 2455.74 116.569  25
   7   2   2 1256.80 76.5914  25
  -7   3   4 14.3122 13.6872  18
  -7   3   3 17.9212 16.0303  18
   7   3  -2 9.85224 17.4412  19
  -7   3   2-2.07105 15.2642  18
   7   3  -1 254.524 33.6634  19
  -7   3   1 220.966 27.0652  18
   7   3  -1 223.618 34.7542  25
   7   3   0-5.06859 17.7614  19
   7   3   0 54.2400 22.2119  25
   7  -3   1 75.0647 19.3073  22
   7   3   1 108.981 22.7762  19
   7   3   1 37.5880 20.9629  25
   7  -3   2 120.960 21.6513  22
   7   3   2 119.990 25.1639  25
   7  -3   3 7.51824 12.4509  22
   7  -3   4 168.947 20.9045  22
   0   0   0    0.00    0.00   0

TITL UrAc_173K in P2(1)/n
REM P2(1)/n (#14 in standard setting)
CELL 1.54184   6.228766   7.311276  13.127384  90.0000  90.6321  90.0000
ZERR    4.00   0.000369   0.000488   0.000847   0.0000   0.0060   0.0000
LATT  1
SYMM -x+1/2, y+1/2,-z+1/2
SFAC C H N O
UNIT 20.00 16.00 16.00 12.00
TREF
HKLF 4
END
;
_shelx_hkl_checksum                82238
_olex2_submission_special_instructions  'No special instructions were received'
_oxdiff_exptl_absorpt_empirical_details
;
Empirical correction (ABSPACK) includes:
- Absorption correction using spherical harmonics
- Frame scaling
;
_oxdiff_exptl_absorpt_empirical_full_max  1.299
_oxdiff_exptl_absorpt_empirical_full_min  0.804
loop_
  _twin_individual_id
  _twin_individual_mass_fraction_refined
 1 0.9609(19)
 2 0.0391(19)
