# Supplementary material
Source: MDPI journal article supplement (https://www.mdpi.com/2075-163X/9/6/373)
Supplement: s1 [file s1 › UA_-143_last.cif]

data_UA_-143_urac_130k
_audit_creation_date               2019-04-29
_audit_creation_method
;
Olex2 1.2
(compiled 2018.05.29 svn.r3508 for OlexSys, GUI svn.r5506)
;
_shelx_SHELXL_version_number       '2018/3'
_audit_contact_author_address      ?
_audit_contact_author_email        ?
_audit_contact_author_name         ''
_audit_contact_author_phone        ?
_publ_contact_author_id_orcid      ?
_publ_section_references
;
Dolomanov, O.V., Bourhis, L.J., Gildea, R.J, Howard, J.A.K. & Puschmann, H.
 (2009), J. Appl. Cryst. 42, 339-341.

Sheldrick, G.M. (2015). Acta Cryst. C71, 3-8.
;
_chemical_name_common              ?
_chemical_name_systematic          ?
_chemical_formula_moiety           'C5 H4 N4 O3'
_chemical_formula_sum              'C5 H4 N4 O3'
_chemical_formula_weight           168.12
_chemical_melting_point            ?
_chemical_oxdiff_formula           'C5 H4 N4 O3'
loop_
  _atom_type_symbol
  _atom_type_description
  _atom_type_scat_dispersion_real
  _atom_type_scat_dispersion_imag
  _atom_type_scat_source
 'C' 'C' 0.0181 0.0091 'International Tables Vol C Tables 4.2.6.8 and 6.1.1.4'
 'H' 'H' 0.0000 0.0000 'International Tables Vol C Tables 4.2.6.8 and 6.1.1.4'
 'N' 'N' 0.0311 0.0180 'International Tables Vol C Tables 4.2.6.8 and 6.1.1.4'
 'O' 'O' 0.0492 0.0322 'International Tables Vol C Tables 4.2.6.8 and 6.1.1.4'

_shelx_space_group_comment
;
The symmetry employed for this shelxl refinement is uniquely defined
by the following loop, which should always be used as a source of
symmetry information in preference to the above space-group names.
They are only intended as comments.
;
_space_group_crystal_system        'monoclinic'
_space_group_IT_number             14
_space_group_name_H-M_alt          'P 1 21/n 1'
_space_group_name_Hall             '-P 2yn'
loop_
  _space_group_symop_operation_xyz
 'x, y, z'
 '-x+1/2, y+1/2, -z+1/2'
 '-x, -y, -z'
 'x-1/2, -y-1/2, z-1/2'

_cell_length_a                     6.2352(5)
_cell_length_b                     7.2756(6)
_cell_length_c                     13.1328(11)
_cell_angle_alpha                  90
_cell_angle_beta                   90.710(8)
_cell_angle_gamma                  90
_cell_volume                       595.72(8)
_cell_formula_units_Z              4
_cell_measurement_reflns_used      1232
_cell_measurement_temperature      130(2)
_cell_measurement_theta_max        72.6150
_cell_measurement_theta_min        6.7280
_shelx_estimated_absorpt_T_max     ?
_shelx_estimated_absorpt_T_min     ?
_exptl_absorpt_coefficient_mu      1.381
_exptl_absorpt_correction_T_max    1.000
_exptl_absorpt_correction_T_min    0.923
_exptl_absorpt_correction_type     gaussian
_exptl_absorpt_process_details
;
CrysAlisPro 1.171.39.44a (Rigaku Oxford Diffraction, 2018)
Numerical absorption correction based on gaussian integration over
			a multifaceted crystal model
Empirical absorption correction using spherical harmonics,
 implemented in SCALE3 ABSPACK scaling algorithm.
;
_exptl_absorpt_special_details     ?
_exptl_crystal_colour              'translucent light-yellow'
_exptl_crystal_density_diffrn      1.875
_exptl_crystal_density_meas        ?
_exptl_crystal_density_method      ?
_exptl_crystal_description         'prism'
_exptl_crystal_F_000               344
loop_
  _exptl_crystal_face_index_h
  _exptl_crystal_face_index_k
  _exptl_crystal_face_index_l
  _exptl_crystal_face_perp_dist
 1 4 3 0.0354
 0 1 -8 0.0052
 2 3 -5 0.0332
 4 0 -2 0.0363
 -1 -4 1 0.0311
 0 0 9 0.0188
 2 -3 4 0.0395
 -4 -1 3 0.0226
 -3 3 -3 0.0269

_exptl_crystal_size_max            0.075
_exptl_crystal_size_mid            0.07
_exptl_crystal_size_min            0.027
loop_
  _exptl_oxdiff_crystal_face_indexfrac_h
  _exptl_oxdiff_crystal_face_indexfrac_k
  _exptl_oxdiff_crystal_face_indexfrac_l
  _exptl_oxdiff_crystal_face_x
  _exptl_oxdiff_crystal_face_y
  _exptl_oxdiff_crystal_face_z
 1.1611 4.2773 2.6184 -0.1911 -0.7964 0.5738
 0.3994 0.5096 -8.4434 0.1666 0.6936 0.7008
 2.2102 2.9567 -4.8028 0.2751 -0.0665 0.9591
 3.9675 0.1061 -1.7741 0.8828 -0.2121 0.4191
 -1.3128 -4.4436 0.8537 0.1212 0.5055 -0.8543
 -0.2682 -0.0496 8.5117 -0.1825 -0.7601 -0.6237
 2.1291 -3.4511 3.6662 0.7360 -0.1764 -0.6536
 -3.6046 -1.2924 3.1862 -0.7126 0.1714 -0.6803
 -2.7882 3.0253 -2.8342 -0.8522 0.2043 0.4817

_exptl_transmission_factor_max     ?
_exptl_transmission_factor_min     ?
_diffrn_reflns_av_R_equivalents    0.0251
_diffrn_reflns_av_unetI/netI       0.0349
_diffrn_reflns_Laue_measured_fraction_full  0.994
_diffrn_reflns_Laue_measured_fraction_max  0.994
_diffrn_reflns_limit_h_max         7
_diffrn_reflns_limit_h_min         -7
_diffrn_reflns_limit_k_max         8
_diffrn_reflns_limit_k_min         -5
_diffrn_reflns_limit_l_max         15
_diffrn_reflns_limit_l_min         -16
_diffrn_reflns_number              2544
_diffrn_reflns_point_group_measured_fraction_full  0.994
_diffrn_reflns_point_group_measured_fraction_max  0.994
_diffrn_reflns_theta_full          67.684
_diffrn_reflns_theta_max           69.935
_diffrn_reflns_theta_min           3.366
_diffrn_ambient_environment        N~2~
_diffrn_ambient_temperature        130(2)
_diffrn_detector                   'CCD plate'
_diffrn_detector_area_resol_mean   ?
_diffrn_detector_type              HyPix3000
_diffrn_measured_fraction_theta_full  0.994
_diffrn_measured_fraction_theta_max  0.994
_diffrn_measurement_details
;
List of Runs (angles in degrees, time in seconds):

  # Type    Start    End  Width  t~exp~   \w     \q     \k     \f   Frames
--------------------------------------------------------------------------
  1  \w   -100.00 -73.00   0.50    1.00    --  -38.95 -55.00 -24.00   54
  2  \w    -54.00 -16.00   0.50    1.00    --  -38.95  55.00 119.00   76
  3  \w    -65.00 -30.00   0.50    1.00    --  -38.95 -55.00 -24.00   70
  4  \w     24.00  54.00   0.50    1.00    --   38.95  55.00 119.00   60
  5  \w     89.00 153.00   0.50    2.50    --  107.00  55.00 119.00  128
  6  \w     45.00 127.00   0.50    2.50    --  107.00 -55.00 -24.00  164
  7  \w    -62.00   4.00   0.50    1.00    --  -38.95  77.00-150.00  132
  8  \w    -52.00 -14.00   0.50    1.00    --  -38.95  43.00 150.00   76
  9  \w   -102.00 -42.00   0.50    1.00    --  -38.95 -65.00 -60.00  120
 10  \w    -10.00  21.00   0.50    1.00    --  -38.95  43.00 150.00   62
 11  \w     68.00 106.00   0.50    1.00    --   38.95  21.00  90.00   76
 12  \w    -18.00  11.00   0.50    1.00    --   38.95 -32.00 -30.00   58
 13  \w     29.00  63.00   0.50    1.00    --   38.95  21.00  90.00   68
 14  \w    -26.00   0.00   0.50    1.00    --   38.95 -55.00 -24.00   52
 15  \w     16.00  48.00   0.50    1.00    --   38.95 -32.00 -30.00   64
 16  \w    -21.00  21.00   0.50    1.00    --   38.95 -32.00 150.00   84
 17  \w     34.00  63.00   0.50    1.00    --   38.95  43.00 -90.00   58
 18  \w     89.00 155.00   0.50    2.50    --  107.00  45.00   0.00  132
 19  \w     78.00 129.00   0.50    2.50    --  107.00 -61.00-150.00  102
 20  \w     68.00 114.00   0.50    2.50    --  107.00-133.00-150.00   92
 21  \w     41.00 120.00   0.50    2.50    --  107.00 -30.00 -60.00  158
 22  \w     93.00 127.00   0.50    2.50    --  107.00  30.00-180.00   68
 23  \w     99.00 153.00   0.50    2.50    --  107.00  45.00  90.00  108
 24  \w     55.00 122.00   0.50    2.50    --  107.00 -37.00  90.00  134
 25  \w     97.00 122.00   0.50    2.50    --  107.00 -53.00-150.00   50
 26  \w     99.00 125.00   0.50    2.50    --  107.00-133.00 -60.00   52
 27  \w     59.00  84.00   0.50    2.50    --  107.00 -53.00-150.00   50
 28  \w    120.00 155.00   0.50    2.50    --  107.00  30.00  30.00   70
 29  \w     44.00  92.00   0.50    2.50    --  107.00-133.00 -60.00   96
 30  \w    107.00 142.00   0.50    2.50    --  107.00  15.00  90.00   70
 31  \w     72.00 115.00   0.50    2.50    --  107.00 -37.00 150.00   86
;
_diffrn_measurement_device         'four-circle diffractometer'
_diffrn_measurement_device_type   
 'SuperNova, Single source at offset/far, HyPix3000'
_diffrn_measurement_method         '\w scans'
_diffrn_orient_matrix_type        
 'CrysAlisPro convention (1999,Acta A55,543-557)'
_diffrn_orient_matrix_UB_11        0.2182804000
_diffrn_orient_matrix_UB_12        -0.0946689000
_diffrn_orient_matrix_UB_13        -0.0151195000
_diffrn_orient_matrix_UB_21        -0.0921684000
_diffrn_orient_matrix_UB_22        -0.1043518000
_diffrn_orient_matrix_UB_23        -0.0928090000
_diffrn_orient_matrix_UB_31        0.0700472000
_diffrn_orient_matrix_UB_32        0.1580800000
_diffrn_orient_matrix_UB_33        -0.0701452000
_diffrn_radiation_monochromator    mirror
_diffrn_radiation_probe            x-ray
_diffrn_radiation_type             CuK\a
_diffrn_radiation_wavelength       1.54184
_diffrn_source                     'micro-focus sealed X-ray tube'
_diffrn_source_type                'SuperNova (Cu) X-ray Source'
_reflns_Friedel_coverage           0.000
_reflns_Friedel_fraction_full      .
_reflns_Friedel_fraction_max       .
_reflns_number_gt                  979
_reflns_number_total               1122
_reflns_odcompleteness_completeness  99.45
_reflns_odcompleteness_iscentric   1
_reflns_odcompleteness_theta       72.42
_reflns_special_details
;
 Reflections were merged by SHELXL according to the crystal
 class for the calculation of statistics and refinement.
 
 _reflns_Friedel_fraction is defined as the number of unique
 Friedel pairs measured divided by the number that would be
 possible theoretically, ignoring centric projections and
 systematic absences. Completness statistics refer to single and
 composite reflections containing twin component 1 only.
;
_reflns_threshold_expression       'I > 2\s(I)'
_computing_cell_refinement         'CrysAlisPro 1.171.39.44a (Rigaku OD, 2018)'
_computing_data_collection         'CrysAlisPro 1.171.39.44a (Rigaku OD, 2018)'
_computing_data_reduction          'CrysAlisPro 1.171.39.44a (Rigaku OD, 2018)'
_computing_molecular_graphics      'Olex2 (Dolomanov et al., 2009)'
_computing_publication_material    'Olex2 (Dolomanov et al., 2009)'
_computing_structure_refinement    'ShelXL (Sheldrick, 2015)'
_computing_structure_solution      'SHELXT (Sheldrick, 2015)'
_refine_diff_density_max           0.474
_refine_diff_density_min           -0.298
_refine_diff_density_rms           0.083
_refine_ls_extinction_coef         0.0013(2)
_refine_ls_extinction_expression  
 'Fc^*^=kFc[1+0.001xFc^2^\l^3^/sin(2\q)]^-1/4^'
_refine_ls_extinction_method       'SHELXL-2018/3 (Sheldrick 2018)'
_refine_ls_goodness_of_fit_ref     1.123
_refine_ls_hydrogen_treatment      constr
_refine_ls_matrix_type             full
_refine_ls_number_parameters       111
_refine_ls_number_reflns           1122
_refine_ls_number_restraints       0
_refine_ls_R_factor_all            0.0623
_refine_ls_R_factor_gt             0.0550
_refine_ls_restrained_S_all        1.123
_refine_ls_shift/su_max            0.000
_refine_ls_shift/su_mean           0.000
_refine_ls_structure_factor_coef   Fsqd
_refine_ls_weighting_details      
 'w=1/[\s^2^(Fo^2^)+(0.0953P)^2^+0.6213P] where P=(Fo^2^+2Fc^2^)/3'
_refine_ls_weighting_scheme        calc
_refine_ls_wR_factor_gt            0.1698
_refine_ls_wR_factor_ref           0.1776
_refine_special_details
;
 Refined as a 2-component twin.
;
_olex2_refinement_description
;
1. Twinned data refinement
 Scales: 0.9802(15)
 0.0198(15)
2. Fixed Uiso
 At 1.2 times of:
  All N(H) groups
3.a Aromatic/amide H refined with riding coordinates:
 N1(H1), N2(H2), N3(H3), N4(H4)
;
_atom_sites_solution_hydrogens     geom
_atom_sites_solution_primary       ?
_atom_sites_solution_secondary     ?
loop_
  _atom_site_label
  _atom_site_type_symbol
  _atom_site_fract_x
  _atom_site_fract_y
  _atom_site_fract_z
  _atom_site_U_iso_or_equiv
  _atom_site_adp_type
  _atom_site_occupancy
  _atom_site_site_symmetry_order
  _atom_site_calc_flag
  _atom_site_refinement_flags_posn
  _atom_site_refinement_flags_adp
  _atom_site_refinement_flags_occupancy
  _atom_site_disorder_assembly
  _atom_site_disorder_group
 O1 O 0.9260(4) 0.4839(3) 0.36757(17) 0.0343(6) Uani 1 1 d . . . . .
 O2 O 0.5821(4) 0.7687(3) 0.62991(16) 0.0322(6) Uani 1 1 d . . . . .
 O3 O -0.0307(3) 0.9672(3) 0.35970(16) 0.0308(6) Uani 1 1 d . . . . .
 N1 N 0.7541(4) 0.6363(3) 0.49461(19) 0.0283(6) Uani 1 1 d . . . . .
 H1 H 0.858594 0.608071 0.535011 0.034 Uiso 1 1 calc R . . . .
 N2 N 0.6156(4) 0.6345(4) 0.3285(2) 0.0293(7) Uani 1 1 d . . . . .
 H2 H 0.621218 0.606192 0.265027 0.035 Uiso 1 1 calc R . . . .
 N3 N 0.2351(4) 0.8757(3) 0.4747(2) 0.0273(6) Uani 1 1 d . . . . .
 H3 H 0.183334 0.917721 0.530482 0.033 Uiso 1 1 calc R . . . .
 N4 N 0.2739(4) 0.7998(4) 0.31321(19) 0.0270(7) Uani 1 1 d . . . . .
 H4 H 0.249566 0.787447 0.248970 0.032 Uiso 1 1 calc R . . . .
 C1 C 0.7746(5) 0.5793(4) 0.3952(2) 0.0295(7) Uani 1 1 d . . . . .
 C2 C 0.4484(5) 0.7353(4) 0.3651(2) 0.0268(7) Uani 1 1 d . . . . .
 C3 C 0.4279(5) 0.7833(4) 0.4650(2) 0.0276(7) Uani 1 1 d . . . . .
 C4 C 0.5863(5) 0.7337(4) 0.5383(2) 0.0278(7) Uani 1 1 d . . . . .
 C5 C 0.1421(5) 0.8887(4) 0.3814(2) 0.0280(7) Uani 1 1 d . . . . .

loop_
  _atom_site_aniso_label
  _atom_site_aniso_U_11
  _atom_site_aniso_U_22
  _atom_site_aniso_U_33
  _atom_site_aniso_U_23
  _atom_site_aniso_U_13
  _atom_site_aniso_U_12
 O1 0.0304(12) 0.0426(13) 0.0298(13) 0.0007(10) -0.0036(9) 0.0056(10)
 O2 0.0357(12) 0.0394(13) 0.0214(11) 0.0019(9) -0.0036(9) -0.0004(10)
 O3 0.0280(11) 0.0384(12) 0.0259(11) -0.0003(9) -0.0033(8) 0.0035(9)
 N1 0.0250(12) 0.0315(14) 0.0282(14) 0.0033(10) -0.0060(10) 0.0006(10)
 N2 0.0271(13) 0.0360(14) 0.0247(13) -0.0006(11) -0.0037(10) 0.0003(11)
 N3 0.0256(12) 0.0319(14) 0.0242(13) -0.0014(10) 0.0001(10) 0.0009(10)
 N4 0.0267(13) 0.0330(14) 0.0213(12) -0.0013(10) -0.0031(10) 0.0013(10)
 C1 0.0266(15) 0.0297(15) 0.0321(16) 0.0017(13) -0.0031(12) -0.0025(12)
 C2 0.0267(14) 0.0285(15) 0.0251(15) 0.0007(12) -0.0030(12) -0.0026(12)
 C3 0.0288(15) 0.0298(16) 0.0242(15) -0.0010(12) -0.0036(12) -0.0011(12)
 C4 0.0301(15) 0.0262(15) 0.0271(16) 0.0017(12) -0.0023(12) -0.0038(12)
 C5 0.0265(14) 0.0313(16) 0.0264(15) 0.0008(12) -0.0010(11) -0.0042(12)

_geom_special_details
;
 All esds (except the esd in the dihedral angle between two l.s. planes)
 are estimated using the full covariance matrix.  The cell esds are taken
 into account individually in the estimation of esds in distances, angles
 and torsion angles; correlations between esds in cell parameters are only
 used when they are defined by crystal symmetry.  An approximate (isotropic)
 treatment of cell esds is used for estimating esds involving l.s. planes.
;
loop_
  _geom_bond_atom_site_label_1
  _geom_bond_atom_site_label_2
  _geom_bond_distance
  _geom_bond_site_symmetry_2
  _geom_bond_publ_flag
 O1 C1 1.230(4) . ?
 O2 C4 1.230(4) . ?
 O3 C5 1.249(4) . ?
 N1 H1 0.8600 . ?
 N1 C1 1.377(4) . ?
 N1 C4 1.394(4) . ?
 N2 H2 0.8600 . ?
 N2 C1 1.375(4) . ?
 N2 C2 1.366(4) . ?
 N3 H3 0.8600 . ?
 N3 C3 1.385(4) . ?
 N3 C5 1.352(4) . ?
 N4 H4 0.8600 . ?
 N4 C2 1.360(4) . ?
 N4 C5 1.384(4) . ?
 C2 C3 1.367(4) . ?
 C3 C4 1.417(5) . ?

loop_
  _geom_angle_atom_site_label_1
  _geom_angle_atom_site_label_2
  _geom_angle_atom_site_label_3
  _geom_angle
  _geom_angle_site_symmetry_1
  _geom_angle_site_symmetry_3
  _geom_angle_publ_flag
 C1 N1 H1 115.8 . . ?
 C1 N1 C4 128.5(3) . . ?
 C4 N1 H1 115.8 . . ?
 C1 N2 H2 120.6 . . ?
 C2 N2 H2 120.6 . . ?
 C2 N2 C1 118.7(3) . . ?
 C3 N3 H3 125.9 . . ?
 C5 N3 H3 125.9 . . ?
 C5 N3 C3 108.3(3) . . ?
 C2 N4 H4 125.8 . . ?
 C2 N4 C5 108.4(3) . . ?
 C5 N4 H4 125.8 . . ?
 O1 C1 N1 122.0(3) . . ?
 O1 C1 N2 121.8(3) . . ?
 N2 C1 N1 116.2(3) . . ?
 N2 C2 C3 123.8(3) . . ?
 N4 C2 N2 128.2(3) . . ?
 N4 C2 C3 108.0(3) . . ?
 N3 C3 C4 131.3(3) . . ?
 C2 C3 N3 107.7(3) . . ?
 C2 C3 C4 121.0(3) . . ?
 O2 C4 N1 122.2(3) . . ?
 O2 C4 C3 126.0(3) . . ?
 N1 C4 C3 111.7(3) . . ?
 O3 C5 N3 126.7(3) . . ?
 O3 C5 N4 125.7(3) . . ?
 N3 C5 N4 107.6(3) . . ?

loop_
  _geom_hbond_atom_site_label_D
  _geom_hbond_atom_site_label_H
  _geom_hbond_atom_site_label_A
  _geom_hbond_distance_DH
  _geom_hbond_distance_HA
  _geom_hbond_distance_DA
  _geom_hbond_angle_DHA
  _geom_hbond_site_symmetry_A
  _geom_hbond_publ_flag
 N1 H1 O1 0.86 1.96 2.816(3) 172.5 3_766 yes
 N2 H2 O3 0.86 2.00 2.800(3) 154.2 2_545 yes
 N3 H3 O3 0.86 1.93 2.780(3) 169.9 3_576 yes
 N4 H4 O2 0.86 1.91 2.721(3) 155.7 4_575 yes


loop_
  _geom_torsion_atom_site_label_1
  _geom_torsion_atom_site_label_2
  _geom_torsion_atom_site_label_3
  _geom_torsion_atom_site_label_4
  _geom_torsion
  _geom_torsion_site_symmetry_1
  _geom_torsion_site_symmetry_2
  _geom_torsion_site_symmetry_3
  _geom_torsion_site_symmetry_4
  _geom_torsion_publ_flag
 N2 C2 C3 N3 -176.9(3) . . . . ?
 N2 C2 C3 C4 1.6(5) . . . . ?
 N3 C3 C4 O2 -1.2(6) . . . . ?
 N3 C3 C4 N1 178.4(3) . . . . ?
 N4 C2 C3 N3 1.2(4) . . . . ?
 N4 C2 C3 C4 179.7(3) . . . . ?
 C1 N1 C4 O2 176.2(3) . . . . ?
 C1 N1 C4 C3 -3.4(4) . . . . ?
 C1 N2 C2 N4 -178.5(3) . . . . ?
 C1 N2 C2 C3 -0.8(5) . . . . ?
 C2 N2 C1 O1 177.9(3) . . . . ?
 C2 N2 C1 N1 -1.9(4) . . . . ?
 C2 N4 C5 O3 178.7(3) . . . . ?
 C2 N4 C5 N3 -0.9(3) . . . . ?
 C2 C3 C4 O2 -179.3(3) . . . . ?
 C2 C3 C4 N1 0.4(4) . . . . ?
 C3 N3 C5 O3 -178.0(3) . . . . ?
 C3 N3 C5 N4 1.6(3) . . . . ?
 C4 N1 C1 O1 -175.5(3) . . . . ?
 C4 N1 C1 N2 4.3(5) . . . . ?
 C5 N3 C3 C2 -1.7(4) . . . . ?
 C5 N3 C3 C4 180.0(3) . . . . ?
 C5 N4 C2 N2 177.7(3) . . . . ?
 C5 N4 C2 C3 -0.2(3) . . . . ?

_shelx_res_file
;
TITL urac_130k_a.res in P2(1)/n
    urac_130k.res
    created by SHELXL-2018/3 at 22:37:33 on 29-Apr-2019
REM Old TITL UrAc_130K in P2(1)/n
REM SHELXT solution in P2(1)/n: R1 0.139, Rweak 0.029, Alpha 0.060
REM <I/s> 0.336 for 104 systematic absences, Orientation as input
REM Formula found by SHELXT: C8 N O1
CELL 1.54184 6.2352 7.2756 13.1328 90 90.71 90
ZERR 4 0.0005 0.0006 0.0011 0 0.008 0
LATT 1
SYMM 0.5-X,0.5+Y,0.5-Z
SFAC C H N O
UNIT 20 16 16 12

L.S. 20
PLAN  20
BOND $H
Htab
conf
list 4
fmap 2
acta
TWIN 1 0 0 0 -1 0 0 0 -1 2
OMIT -4 140
OMIT 1 2 2
OMIT -1 2 4
OMIT -1 2 6
OMIT 1 0 5
REM <olex2.extras>
REM <HklSrc "%.\\UrAc_130K.hkl">
REM </olex2.extras>

WGHT    0.095300    0.621300
EXTI    0.001349
BASF   0.01981
FVAR       0.84112
O1    4    0.926007    0.483931    0.367570    11.00000    0.03038    0.04257 =
         0.02981    0.00072   -0.00356    0.00563
O2    4    0.582055    0.768727    0.629909    11.00000    0.03571    0.03937 =
         0.02144    0.00190   -0.00363   -0.00045
O3    4   -0.030690    0.967192    0.359699    11.00000    0.02798    0.03842 =
         0.02587   -0.00030   -0.00327    0.00349
N1    3    0.754101    0.636294    0.494611    11.00000    0.02502    0.03152 =
         0.02822    0.00335   -0.00600    0.00058
AFIX  43
H1    2    0.858594    0.608071    0.535011    11.00000   -1.20000
AFIX   0
N2    3    0.615565    0.634510    0.328515    11.00000    0.02708    0.03601 =
         0.02467   -0.00064   -0.00373    0.00027
AFIX  43
H2    2    0.621218    0.606192    0.265027    11.00000   -1.20000
AFIX   0
N3    3    0.235068    0.875746    0.474712    11.00000    0.02565    0.03194 =
         0.02424   -0.00143    0.00013    0.00090
AFIX  43
H3    2    0.183334    0.917721    0.530482    11.00000   -1.20000
AFIX   0
N4    3    0.273868    0.799787    0.313210    11.00000    0.02668    0.03298 =
         0.02133   -0.00133   -0.00312    0.00129
AFIX  43
H4    2    0.249566    0.787447    0.248970    11.00000   -1.20000
AFIX   0
C1    1    0.774558    0.579261    0.395209    11.00000    0.02657    0.02971 =
         0.03211    0.00171   -0.00311   -0.00247
C2    1    0.448437    0.735258    0.365051    11.00000    0.02671    0.02846 =
         0.02511    0.00071   -0.00300   -0.00255
C3    1    0.427920    0.783342    0.465049    11.00000    0.02877    0.02983 =
         0.02416   -0.00097   -0.00356   -0.00111
C4    1    0.586261    0.733748    0.538305    11.00000    0.03008    0.02617 =
         0.02711    0.00167   -0.00228   -0.00382
C5    1    0.142053    0.888659    0.381430    11.00000    0.02645    0.03125 =
         0.02637    0.00084   -0.00104   -0.00420
HKLF 4


REM  urac_130k_a.res in P2(1)/n
REM wR2 = 0.1776, GooF = S = 1.123, Restrained GooF = 1.123 for all data
REM R1 = 0.0550 for 979 Fo > 4sig(Fo) and 0.0623 for all 1122 data
REM 111 parameters refined using 0 restraints

END

WGHT      0.0953      0.6213

REM Instructions for potential hydrogen bonds
EQIV $1 -x+2, -y+1, -z+1
HTAB N1 O1_$1
EQIV $2 -x+1/2, y-1/2, -z+1/2
HTAB N2 O3_$2
EQIV $3 -x, -y+2, -z+1
HTAB N3 O3_$3
EQIV $4 x-1/2, -y+3/2, z-1/2
HTAB N4 O2_$4

REM Highest difference peak  0.474,  deepest hole -0.298,  1-sigma level  0.083
Q1    1   0.4203  0.7789  0.6319  11.00000  0.05    0.47
Q2    1   0.2905  0.7980  0.6217  11.00000  0.05    0.33
Q3    1   0.5860  0.7354  0.4609  11.00000  0.05    0.32
Q4    1   0.4354  0.7711  0.5340  11.00000  0.05    0.30
Q5    1   1.0937  0.4704  0.3644  11.00000  0.05    0.29
Q6    1   0.1070  0.9931  0.3641  11.00000  0.05    0.28
Q7    1   0.4299  0.7418  0.4267  11.00000  0.05    0.27
Q8    1   0.9327  0.5142  0.4431  11.00000  0.05    0.25
Q9    1   0.7416  0.7164  0.3248  11.00000  0.05    0.24
Q10   1   0.2557  0.7780  0.5044  11.00000  0.05    0.21
Q11   1   1.0027  0.5224  0.2797  11.00000  0.05    0.21
Q12   1   0.6060  0.7369  0.3589  11.00000  0.05    0.20
Q13   1  -0.0521  0.9740  0.2982  11.00000  0.05    0.20
Q14   1   0.7429  0.3496  0.3607  11.00000  0.05    0.18
Q15   1   0.4164  0.7923  0.3231  11.00000  0.05    0.18
Q16   1   0.0520  0.8649  0.4815  11.00000  0.05    0.18
Q17   1   0.5926  0.6479  0.4987  11.00000  0.05    0.17
Q18   1   0.7882  0.4911  0.5438  11.00000  0.05    0.16
Q19   1   0.7545  0.8677  0.6627  11.00000  0.05    0.16
Q20   1   0.7566  0.7289  0.5166  11.00000  0.05    0.16
;
_shelx_res_checksum                84319
_shelx_hkl_file
;
   0   0   1   -0.16    0.30
   0   0  -1    0.42    0.36
   0   0  -2 1594.71   40.49
   0   0  -2 1622.30   40.53
   0   0   3    0.09    0.90
   0   0  -3    0.20    0.99
   0   0  -3    0.40    1.01
   0   0  -4 2795.78   70.71
   0   0   4 2781.74   70.35
   0   0  -5   -0.18    1.25
   0   0   5   -0.32    1.10
   0   0   5    0.19    1.42
   0   0  -6 3221.76   83.38
   0   0   6 3205.75   83.87
   0   0   6 3266.72   82.95
   0   0  -7    1.10    1.33
   0   0   7    0.30    1.66
   0   0  -7   -0.31    1.39
   0   0  -8 1736.86   49.83
   0   0  -8 1657.73   48.88
   0   0   8 1812.68   49.94
   0   0   9    3.09    1.98
   0   0  -9    0.41    1.58
   0   0  -9    0.45    1.39
   0   0 -10   79.40    4.57
   0   0 -10   77.65    7.02
   0   0  10   65.06    6.89
   0   0 -10   74.71    7.17
   0   0 -11    0.77    1.44
   0   0  11   -0.59    2.42
   0   0 -12  396.77   13.62
   0   0 -13   -0.19    1.40
   0   0 -14   24.22    2.62
   0   0 -15   -0.92    1.17
   0   0 -16   36.96    2.30
   0  -1   0    0.35    0.34
   0  -1   0    0.54    0.30
   0   1   0    0.63    0.55
   0   1  -1   13.06    0.86
   0  -1  -1   12.59    1.04
   0   1   1   15.28    1.27
   0  -1  -1   16.74    1.25
   0  -1  -1   14.85    1.26
   0  -1  -1   14.54    1.00
   0   1  -1   13.43    0.99
   0   1  -1   12.32    1.18
   0  -1   2 1726.28   43.17
   0  -1  -2 1813.95   44.69
   0  -1  -2 1803.07   44.19
   0  -1  -2 1767.34   44.51
   0  -1  -2 1753.18   44.41
   0   1  -2 1785.09   44.50
   0   1  -2 1738.37   43.51
   0   1  -2 1756.96   44.02
   0  -1  -3   16.45    1.71
   0   1  -3   16.05    1.86
   0  -1  -3   16.66    1.86
   0  -1  -4  318.28   10.68
   0   1  -4  321.95   10.59
   0  -1  -4  326.69   11.04
   0   1   4  337.52   11.08
   0   1  -5    2.65    1.28
   0  -1   5    1.96    1.20
   0   1   5    2.17    1.40
   0   1   5    3.18    1.35
   0  -1  -5    1.28    1.15
   0  -1  -6  211.35    9.03
   0  -1   6  209.79    9.22
   0   1   6  223.64    9.45
   0   1   6  208.24    9.15
   0   1  -6  206.60    8.95
   0   1   7   -0.31    1.42
   0  -1  -7    0.62    1.54
   0   1   7   -0.29    1.42
   0   1  -7    0.31    1.57
   0  -1   7   -0.30    1.33
   0   1  -7   -0.27    1.33
   0  -1  -7   -0.29    1.36
   0  -1  -8   97.94    6.82
   0   1  -8  119.94    7.26
   0  -1   8   93.89    6.90
   0  -1  -8  105.39    7.26
   0   1   8  108.85    7.52
   0   1   8  104.17    7.09
   0   1  -8   98.05    7.19
   0   1  -9   23.97    3.99
   0  -1   9   20.30    3.70
   0   1   9   13.83    3.57
   0   1  -9   15.24    3.07
   0  -1  -9   16.69    3.42
   0  -1  -9   21.54    3.62
   0  -1 -10    7.73    1.85
   0   1 -10    5.59    1.66
   0   1 -10    4.28    2.36
   0  -1 -10    8.41    2.82
   0   1 -10    6.32    2.44
   0  -1 -10   11.40    3.03
   0  -1  10    3.09    2.06
   0   1  10    1.56    2.22
   0  -1 -10    9.03    2.06
   0   1 -11   84.62    4.90
   0  -1 -11   77.14    5.08
   0  -1 -11   85.81    4.90
   0  -1 -12  144.66    7.37
   0   1 -12  152.44    7.04
   0  -1 -12  163.86    7.22
   0  -1 -13   16.93    2.31
   0   1 -13   15.02    2.22
   0  -1 -14   15.12    2.12
   0   1 -14   18.60    2.24
   0   1 -15    3.05    1.18
   0  -1 -15    1.10    1.08
   0  -1 -16    0.08    0.74
   0   1 -16    0.30    0.68
   0   2   1   14.32    1.55
   0  -2  -1   13.38    1.45
   0   2  -1   13.34    1.55
   0   2  -1   11.85    1.62
   0  -2  -2  154.13    5.89
   0  -2  -2  167.35    6.56
   0  -2  -2  162.51    6.24
   0   2  -2  161.03    6.36
   0   2   2  170.60    6.35
   0   2  -2  163.16    5.84
   0  -2  -3  112.53    5.20
   0   2  -3  112.87    5.34
   0   2   3  120.70    5.53
   0  -2  -3  103.90    5.18
   0  -2  -3  119.23    5.50
   0   2  -4  590.19   18.13
   0  -2  -4  590.84   17.76
   0  -2  -4  600.37   18.34
   0   2   4  571.13   18.23
   0   2   5  121.94    6.61
   0  -2  -5  119.65    6.07
   0  -2  -6  109.33    6.33
   0   2   6  118.51    6.96
   0  -2  -7   56.27    4.74
   0   2   7   50.83    4.89
   0   2   8  155.51    9.30
   0  -2  -8  124.39    8.21
   0  -2  -9  122.80    6.36
   0   2   9  148.02    9.66
   0   2  10    6.05    2.66
   0  -2 -10    2.74    1.68
   0  -2 -11   88.65    5.59
   0  -2 -12   27.99    3.22
   0  -2 -13   11.10    2.18
   0  -2 -14   58.43    3.97
   0   2  15    0.12    0.95
   0   3   0    1.13    1.20
   0  -3  -1   55.07    3.96
   0   3  -1   56.33    3.84
   0  -3  -2 1007.74   28.76
   0   3  -2  992.09   28.40
   0  -3  -3   26.81    3.06
   0   3   3   26.98    2.94
   0   3  -3   33.01    3.14
   0   3  -4   71.78    5.00
   0  -3  -4   82.11    5.45
   0   3   4   71.01    5.05
   0   3  -5   75.85    5.48
   0   3   5   68.30    5.36
   0   3   6  189.48   10.04
   0   3   7   25.64    3.86
   0   3   8    9.24    2.94
   0  -3  -8    9.71    2.02
   0   3   9   20.99    4.19
   0  -3  -9   23.27    2.83
   0  -3 -10  149.29    7.46
   0  -3 -11   41.57    3.83
   0  -3 -12   21.57    2.83
   0   3  12   18.49    2.39
   0   3  13  168.37    7.00
   0  -3 -13  165.29    7.56
   0   3  14    1.30    1.17
   0   3  15    0.10    0.78
   0   4   0  153.98    7.84
   0  -4   0  136.82    7.59
   0  -4  -1   20.47    2.94
   0   4  -1   21.15    2.90
   0   4   1   28.00    3.32
   0  -4  -2  101.45    6.73
   0   4  -2  117.28    6.83
   0   4  -3   49.54    4.53
   0  -4  -3   54.06    4.81
   0  -4  -4  768.16   25.55
   0   4  -4  745.35   24.86
   0   4  -5  404.48   16.44
   0   4  -6    8.37    2.49
   0   4  -7  101.38    5.14
   0   4   7  105.87    5.71
   0   4   7   91.52    7.98
   0   4   8   41.14    3.50
   0   4  -8   37.82    3.14
   0   4   8   34.58    5.14
   0   4   9  131.22    6.89
   0   4  -9  145.75    6.54
   0   4 -10  308.57   10.94
   0   4  10  314.42   11.70
   0  -4 -10  304.55   11.86
   0  -4 -11   26.49    3.13
   0   4  11   22.03    2.65
   0  -4 -12  269.77   10.50
   0   4  12  288.02   10.19
   0   4  13  100.23    4.87
   0   4  13  103.56    4.88
   0   4  14   36.72    2.43
   0   4  14   37.04    2.37
   0   5   0    0.76    1.56
   0  -5  -1    8.01    2.35
   0   5   1   11.17    2.71
   0   5  -1   13.71    2.82
   0   5  -2   28.81    3.87
   0  -5  -2   25.66    3.79
   0   5   2   24.49    3.74
   0  -5  -3   49.79    5.40
   0   5   3   39.04    4.71
   0   5  -3   49.66    5.17
   0  -5  -4    4.88    2.08
   0   5   4    0.64    1.21
   0   5  -4    1.96    1.23
   0   5  -5   73.14    4.22
   0   5   5   68.97    4.53
   0   5   6   60.89    4.42
   0   5  -6   63.67    4.06
   0   5   6   54.91    4.43
   0   5  -7    9.69    1.85
   0   5   7    8.56    2.12
   0   5   8   46.66    4.06
   0   5  -8   51.13    3.76
   0   5  -9   15.13    2.29
   0   5  10    3.33    1.50
   0   5 -10    6.25    1.60
   0   5  11   69.68    4.13
   0   5 -11   67.32    3.92
   0   5  12   28.03    2.43
   0   5  13   -0.67    0.85
   0   6   0   78.72    5.14
   0   6   1   75.60    5.00
   0   6  -1   81.54    5.04
   0   6   2   27.21    3.07
   0   6  -2   37.27    3.34
   0   6  -3    9.50    2.04
   0   6  -4   19.93    2.62
   0   6   5    3.90    1.73
   0   6  -5    4.47    1.56
   0   6  -6   42.36    3.35
   0   6  -7  160.59    7.29
   0   6   7  190.94    8.23
   0   6  -8   17.69    2.28
   0   6   8   16.37    2.45
   0   6  -9    2.83    1.32
   0   6 -10    2.14    1.18
   0   6 -11   22.71    1.91
   0   6  11   14.90    1.66
   0   6 -12   43.55    2.26
   0   6  12   43.35    2.28
   0   7   0   -0.46    1.24
   0   7  -1   20.35    2.58
   0   7   1   21.83    2.75
   0   7   2    5.30    1.72
   0   7  -2    5.23    1.70
   0   7   3   23.33    2.81
   0   7  -3   20.85    2.55
   0   7   4    8.06    1.94
   0   7   5   70.28    4.70
   0   7   5   64.51    4.53
   0   7   6   14.10    2.20
   0   7   6   12.28    2.20
   0   7  -7   18.07    2.03
   0   7   7   17.13    2.27
   0   7   7   19.43    2.45
   0   7   8    1.06    1.18
   0   7  -8    2.46    1.14
   0   7   8    0.95    1.07
   0   7  -9    6.45    1.28
   0   7   9    7.31    1.33
   0   7 -10   10.54    1.29
   0   7  10    9.40    1.28
   0   8   0  166.25    6.98
   0   8  -1   10.18    1.74
   0   8   1   13.53    1.93
   0   8   2   35.11    2.94
   0   8   2   37.29    2.99
   0   8  -2   32.30    2.78
   0   8   3    9.35    1.71
   0   8   3   14.05    2.00
   0   8   4    1.81    1.07
   0   8   4   -0.46    1.17
   0   8   5   87.37    4.37
   0   8   5   93.20    4.60
   0   8   6   39.72    2.64
   0   8   6   38.95    2.74
   0   8   7   79.14    3.61
   0   8   7   83.74    3.79
   1   0 -16   -0.72    0.79
   1   0 -15  101.01    4.67
   1   0 -14    0.65    1.16
   1   0 -13   55.68    4.00
   1   0 -12    0.40    1.46
   1   0 -11  108.29    5.74
   1   0 -10    1.10    2.04
  -1   0  10   -0.53    2.19
   1   0 -10   -0.36    1.33
  -1   0   9   45.43    5.41
   1   0  -9   21.93    4.35
   1   0  -8   -0.79    1.77
   1   0  -7  145.23    8.04
   1   0  -7  135.52    8.05
   1   0  -7  144.50    8.01
   1   0  -6    0.49    1.29
   1   0  -6    0.72    1.47
   1   0  -6    0.26    1.44
   1   0  -5 1267.47   34.91
   1   0  -5 1274.33   34.54
   1   0  -5 1213.42   34.48
  -1   0   5 1256.04   34.48
   1   0  -4   -0.62    1.09
  -1   0   4    0.15    1.01
   1   0  -4   -0.34    1.25
   1   0  -3  413.07   12.68
  -1   0   3  404.43   12.34
   1   0  -2    0.49    0.92
  -1   0   2    0.46    0.50
   1   0  -2    0.11    1.01
   1   0  -1  968.77   25.34
  -1   0   0   -0.08    0.69
  -1   0   0   -0.04    0.35
  -1   0  -1   34.56    2.38
  -1   0  -1   40.77    2.51
  -1   0  -2    0.49    0.91
  -1   0  -2    0.41    0.90
  -1   0  -3  101.93    4.73
  -1   0  -3  106.64    4.84
   1   0   4    1.79    1.18
  -1   0  -4   -0.34    1.17
  -1   0  -4    0.32    1.13
   1   0   4    0.88    1.21
  -1   0  -5  185.29    8.23
   1   0   5  173.36    7.83
   1   0   6    0.27    1.41
   1   0   6    0.45    1.23
   1   0   7  583.69   20.59
  -1   0  -7  610.11   20.41
   1   0   8    1.17    1.66
  -1   0  -8    2.54    1.87
  -1   0  -9  388.15   16.25
   1   0   9  353.40   16.41
  -1   0 -10    1.64    2.03
  -1   0 -10    0.97    1.73
  -1   0 -10   -0.36    1.42
  -1   0 -11  106.43    5.66
  -1   0 -12   -0.20    1.47
  -1   0 -13   28.48    2.88
  -1   0 -14    0.65    1.27
  -1   0 -15   14.40    1.84
  -1   0 -16   -0.08    0.74
   1  -1 -16    1.20    0.72
   1   1 -16    1.89    0.81
   1  -1 -15    6.09    1.31
   1   1 -15    4.44    1.23
   1  -1 -14    0.62    1.23
   1   1 -14   -1.39    1.14
   1   1 -13  136.52    6.42
   1  -1 -13  138.36    6.42
   1  -1 -12   61.06    4.58
   1  -1 -12   58.14    4.18
   1   1 -12   63.02    4.29
   1   1 -11   19.08    2.48
   1  -1 -11   12.84    2.41
   1  -1 -11   15.50    2.33
   1   1 -10  128.15    9.50
   1  -1 -10  115.83    5.56
   1  -1 -10  104.73    5.76
  -1  -1  10   72.09    7.70
   1  -1 -10  115.08    9.14
  -1   1  10   54.92    7.21
   1   1 -10  105.82    5.47
   1  -1  -9    2.84    2.49
   1   1  -9    2.84    2.35
  -1   1   9    0.46    1.79
   1   1  -8   17.02    3.19
   1  -1  -8   13.84    2.94
  -1   1   8   21.61    3.27
   1   1  -7  419.56   15.84
   1  -1  -7  415.89   15.85
   1   1  -7  389.57   15.00
   1  -1  -7  394.03   15.45
   1   1  -6  133.68    6.93
   1  -1  -6  152.12    7.63
  -1   1   6  137.96    7.46
   1  -1  -6  138.17    7.53
   1   1  -6  159.21    7.84
   1  -1  -5   41.28    3.54
  -1   1   5   36.79    3.47
   1   1  -5   35.80    3.15
   1   1  -5   39.92    3.61
   1  -1  -5   37.43    3.40
   1   1  -5   33.21    2.99
   1   1  -4   41.88    2.95
   1   1  -4   35.36    3.03
   1   1  -4   46.16    3.15
   1  -1  -4   49.68    3.45
   1  -1  -4   47.32    3.54
  -1   1   4   48.62    3.54
   1  -1  -3   58.99    3.05
   1  -1  -3   66.63    3.84
   1   1  -3   64.73    3.69
   1   1  -3   62.24    3.23
  -1   1   3   64.38    3.92
   1  -1  -2 2578.51   62.75
   1  -1  -2 2478.71   62.74
  -1   1   2 2462.57   62.42
   1   1  -2 2468.45   62.01
   1   1  -2 2431.81   62.62
   1  -1  -1   37.46    2.31
   1   1  -1   35.94    1.66
   1   1  -1   41.17    2.30
   1  -1  -1   38.32    2.28
  -1   1   1   41.52    2.42
  -1  -1   1   37.68    2.22
   1   1   0  221.57    5.89
  -1  -1   0  207.36    6.77
  -1   1   0  222.24    6.80
  -1   1  -1    1.80    0.86
  -1   1  -1    4.09    0.71
  -1  -1  -1    6.14    1.40
  -1   1  -1    7.52    1.23
  -1  -1  -1    4.15    1.03
  -1  -1  -2 1254.49   32.89
  -1   1  -2 1157.43   31.38
  -1  -1  -2 1253.87   31.91
  -1   1  -2 1271.36   32.32
   1   1   2 1298.68   32.72
  -1  -1  -3  319.16   10.77
  -1   1  -3  315.40   10.21
  -1  -1  -3  298.31    9.86
  -1   1  -3  301.61   10.12
   1   1   3  312.55   10.51
   1   1   4   32.11    3.02
  -1  -1  -4   37.43    3.25
   1  -1   4   24.82    2.94
   1   1   4   36.02    3.01
  -1  -1  -4   27.23    2.57
  -1   1  -4   32.62    2.80
   1   1   5   78.59    5.05
   1   1   5   76.73    4.89
   1  -1   5   64.15    4.81
  -1  -1  -5   78.80    5.11
  -1   1  -5   70.32    4.55
  -1   1  -6   41.22    3.81
   1   1   6   34.83    3.67
  -1  -1  -6   34.35    3.56
   1   1   6   37.15    3.70
   1  -1   6   35.67    3.79
  -1   1  -7   69.00    5.58
  -1  -1  -7   53.26    4.97
   1  -1   7   69.06    5.58
   1   1   7   68.78    5.57
   1   1   7   62.68    5.25
   1   1   8    9.14    2.63
   1  -1   8    5.86    2.32
  -1   1  -8   10.33    2.62
  -1  -1  -8    9.02    2.27
   1   1   8    6.31    2.24
  -1  -1  -9   99.44    7.52
  -1   1  -9   97.65    7.48
  -1   1 -10   27.85    4.37
  -1   1 -10   25.66    4.60
  -1  -1 -10   38.62    5.49
  -1   1 -10   23.85    2.81
  -1  -1 -10   28.19    3.18
  -1  -1 -10   31.56    4.69
  -1  -1 -10   35.32    3.12
  -1  -1 -11   28.33    3.00
  -1   1 -11   33.39    3.12
  -1  -1 -11   31.90    3.39
  -1  -1 -12  147.55    6.96
  -1  -1 -12  156.56    7.56
  -1   1 -12  157.94    7.10
  -1  -1 -13   25.98    2.78
  -1   1 -13   16.87    2.47
  -1  -1 -14    1.40    1.26
  -1   1 -14    1.24    1.26
   1   1  14    2.28    1.34
  -1   1 -15    1.03    1.04
  -1  -1 -15    2.07    1.11
  -1  -1 -16    7.01    0.96
   1  -2 -15   13.06    1.70
   1  -2 -14   89.80    4.96
   1  -2 -13   79.29    5.07
   1  -2 -12    3.06    1.93
   1  -2 -11  347.20   13.01
   1  -2 -10  162.92    7.78
  -1   2  10  185.90   11.67
   1   2  -9   98.01    5.73
   1  -2  -9   93.67    5.41
  -1   2   9   90.71    7.62
  -1   2   8  106.13    7.79
  -1   2   7 1119.72   34.26
   1  -2  -7 1091.76   34.05
   1  -2  -6  150.31    8.26
  -1   2   5  560.26   19.19
   1  -2  -5  570.17   18.61
  -1   2   4  106.56    6.23
   1  -2  -4  105.57    5.67
   1  -2  -4   97.01    5.47
  -1   2   3  589.53   18.67
   1  -2  -3  576.07   17.91
  -1   2   3  610.93   18.28
   1  -2  -3  594.54   17.85
  -1   2   2 2991.52   76.01
  -1   2   2 2968.27   75.89
  -1   2   1 9943.64  244.00
   1  -2  -1 9888.37  243.59
  -1   2   1 9999.00  244.52
  -1   2   0 5894.80  144.21
  -1  -2   0 5828.70  143.50
  -1   2   0 5847.77  144.03
   1   2   0 5719.86  143.00
  -1  -2  -1 2134.07   54.79
  -1   2  -1 2197.01   54.76
  -1  -2  -1 2045.63   54.46
  -1   2  -1 2110.05   54.59
  -1   2  -2  398.48   12.75
  -1  -2  -2  424.21   13.40
   1   2   2  398.35   12.89
  -1   2  -2  397.68   12.94
  -1   2  -3 2589.54   67.39
  -1  -2  -3 2678.09   68.59
  -1   2  -3 2554.65   68.00
  -1   2  -3 2659.91   67.41
   1   2   3 2740.53   68.33
  -1   2  -4  788.98   23.00
  -1  -2  -4  827.21   24.42
  -1   2  -4  756.22   23.55
   1   2   4  810.16   24.12
   1   2   5   68.46    5.40
  -1  -2  -5   94.60    6.15
  -1   2  -5   88.89    5.30
  -1   2  -5   69.40    5.35
   1   2   6 1198.97   35.76
   1   2   7  908.75   29.50
   1   2   8   16.29    3.28
  -1  -2  -9   45.84    3.83
   1   2   9   38.99    5.11
   1   2   9   44.62    3.38
  -1  -2 -10   84.11    5.51
   1   2  10   87.10    5.05
  -1  -2 -11  813.33   24.76
   1   2  11  813.00   23.90
  -1  -2 -12   31.05    3.44
   1   2  13   24.35    2.75
   1   2  14   48.44    3.42
   1   2  15   93.56    4.25
  -1   3  15    5.98    1.07
   1  -3 -14   14.01    1.99
   1  -3 -13   19.26    2.55
  -1   3  13   16.70    2.10
   1  -3 -12   54.58    4.35
   1  -3 -11   90.28    5.65
   1   3 -10    4.97    1.84
   1  -3 -10    4.28    1.81
   1   3  -9    9.98    2.20
   1  -3  -9    7.59    1.95
  -1   3   9    8.75    3.15
   1   3  -8   64.69    4.61
   1  -3  -8   71.19    4.54
  -1   3   8   69.49    6.60
  -1   3   8   68.11    4.42
  -1   3   7    5.14    2.26
  -1   3   6  107.82    7.40
   1  -3  -5   75.54    5.60
  -1   3   4   27.91    3.37
   1  -3  -4   18.44    2.71
   1  -3  -3  156.36    7.73
  -1   3   3  153.36    7.73
  -1   3   2  381.61   13.97
  -1   3   1    0.24    1.27
  -1   3   0   29.37    3.07
  -1   3   0   35.41    3.28
  -1   3  -1    2.14    1.21
  -1  -3  -1    4.27    1.49
  -1   3  -1    4.75    1.58
  -1  -3  -2  214.58    8.99
  -1   3  -2  195.00    8.67
  -1   3  -2  198.19    8.44
  -1   3  -3   57.26    4.39
   1   3   3   54.75    4.23
   1   3   4  149.22    7.93
  -1  -3  -4  161.13    8.41
  -1   3  -4  148.42    7.84
  -1   3  -5   24.85    3.41
   1   3   5   25.23    3.51
  -1  -3  -5   27.40    3.53
   1   3   6  150.22    9.18
  -1   3  -6  174.36    9.50
   1   3   7   42.96    4.94
  -1  -3  -8   67.88    4.59
   1   3   8   72.04    6.77
  -1  -3  -9    2.79    1.83
   1   3   9    3.16    1.61
  -1  -3 -10    1.95    1.85
   1   3  10    1.44    1.40
   1   3  11  153.33    7.15
  -1  -3 -11  147.82    7.56
   1   3  12   81.47    4.87
   1   3  12   94.57    5.43
   1   3  13    3.37    1.46
   1   3  13    3.29    1.40
   1   3  14    0.55    1.06
   1   3  15    1.07    0.82
  -1   4  14   -0.28    0.79
  -1   4  14   -0.36    0.80
  -1   4  13   38.63    2.81
   1  -4 -13   40.48    3.17
   1  -4 -12    1.76    1.56
   1  -4 -11   75.37    4.97
   1  -4 -10   28.57    3.21
  -1   4  10   27.90    3.06
   1   4 -10   25.36    3.20
   1   4  -9    4.75    1.63
  -1   4   9    7.67    2.05
   1   4  -9    8.90    2.18
   1   4  -8  156.39    7.95
  -1   4   8  161.24   11.04
   1   4  -8  168.79    7.19
  -1   4   8  164.24    7.67
   1   4  -7   16.06    2.17
  -1   4   7   15.48    3.48
  -1   4   7   20.04    2.72
  -1   4   7   18.26    2.54
  -1   4   6   99.91    5.48
   1   4  -6  103.46    5.09
   1   4  -6   90.82    5.19
  -1   4   6  100.57    5.64
   1  -4  -5   26.99    3.93
   1  -4  -4   61.62    5.47
   1  -4  -3  143.64    8.41
   1  -4  -2  117.32    7.30
  -1   4   2  116.39    7.28
  -1   4   1  351.03   14.04
  -1   4   0   61.09    5.03
  -1   4  -1   64.06    5.06
  -1   4  -1   57.67    4.91
  -1  -4  -1   62.50    4.89
  -1   4  -2   35.19    3.85
  -1  -4  -2   31.48    3.69
  -1   4  -3  258.47   11.81
  -1   4  -4  141.39    8.58
  -1   4  -5    2.48    1.86
   1   4   6  228.21    8.83
   1   4   6  195.48    8.50
  -1   4  -6  200.04   11.51
   1   4   7   32.88    2.94
   1   4   7   33.91    3.25
   1   4   8   24.80    2.75
  -1   4  -9   66.01    4.20
   1   4   9   61.09    4.30
  -1  -4 -10    9.42    2.24
   1   4  10    9.88    2.02
   1   4  10   12.30    2.19
  -1   4 -10   11.02    1.93
   1   4  11   18.03    2.51
   1   4  11   20.37    2.59
   1   4  12    3.00    1.29
   1   4  12    3.12    1.40
   1   4  13   85.92    4.39
   1   4  13   89.72    4.37
   1   4  14    1.61    0.80
   1   4  14    0.98    0.81
  -1   5  13   33.98    2.21
  -1   5  12   32.96    2.55
  -1   5  11   11.48    1.94
   1   5 -11   13.54    1.88
   1   5 -10   28.56    3.10
   1   5 -10   27.86    2.72
  -1   5  10   27.10    2.92
   1   5  -9    0.25    1.42
   1   5  -9    2.01    1.41
  -1   5   9    1.57    1.54
   1   5  -8   10.46    2.27
   1   5  -8   14.26    2.13
  -1   5   8    8.60    2.11
  -1   5   7   38.81    3.68
  -1   5   7   35.97    3.71
   1   5  -7   38.63    3.30
  -1   5   6   19.80    2.90
  -1   5   6   20.39    2.73
  -1   5   6   24.07    2.84
   1   5  -6   23.17    2.76
   1   5  -6   23.56    2.63
   1  -5  -5   35.03    4.96
  -1   5   5   39.13    3.42
   1   5  -5   35.44    3.01
  -1   5   5   31.14    3.32
  -1   5   5   38.36    3.43
   1   5  -5   35.30    3.38
   1   5  -4  162.58    7.54
   1   5  -4  167.69    7.00
  -1   5   4  166.93   10.61
  -1   5   4  169.13    7.59
   1  -5  -4  181.63   10.92
  -1   5   4  167.75    7.88
  -1   5   3    4.67    1.64
   1  -5  -3    8.34    2.58
  -1   5   3    4.84    1.73
   1   5  -3    5.33    1.59
  -1   5   3    7.20    2.59
  -1   5   2    7.01    2.40
   1  -5  -2    8.44    2.60
   1  -5  -1   33.57    4.44
  -1   5   1   28.32    4.04
  -1   5   0  152.10    9.39
  -1   5  -1   86.99    6.92
  -1   5  -2    9.87    2.67
  -1   5  -3    4.50    2.18
  -1   5  -4   39.33    5.11
   1   5   5  170.02    7.88
  -1   5  -5  167.67   10.88
  -1   5  -6    5.80    1.69
   1   5   6    2.28    1.65
  -1   5  -7    7.68    1.76
   1   5   7    4.42    1.80
   1   5   8   10.97    2.09
  -1   5  -8    6.58    1.77
  -1   5  -9   11.36    1.97
   1   5   9    7.86    1.89
  -1   5 -10   39.81    3.17
   1   5  10   37.88    3.22
  -1   5 -11   48.73    3.23
   1   5  11   59.02    3.68
   1   5  12    1.75    1.08
   1   5  13   27.41    1.97
   1   6 -11   80.72    3.77
  -1   6  11   84.39    3.82
   1   6 -10   11.71    1.84
   1   6 -10   12.71    1.79
   1   6  -9   50.48    3.92
   1   6  -9   53.68    3.59
   1   6  -8  137.35    7.10
  -1   6   8  138.38    6.83
   1   6  -8  146.74    6.48
   1   6  -7   86.40    5.64
   1   6  -7   90.56    5.09
  -1   6   7   87.87    5.44
  -1   6   6  334.21   12.80
   1   6  -6  339.85   11.74
  -1   6   6  333.86   12.37
   1   6  -5   23.69    2.98
   1   6  -5   32.20    2.93
  -1   6   5   30.57    3.32
  -1   6   4   12.65    2.29
   1   6  -4    9.58    1.99
   1   6  -3   10.77    2.16
  -1   6   3    7.25    1.98
   1   6  -2   29.06    3.10
  -1   6   2   29.11    3.20
   1   6  -1  171.37    8.05
   1   6   0  151.57    7.51
   1   6   1   76.90    5.19
   1   6   2  135.78    6.99
   1   6   3   46.99    4.08
   1   6   4   38.58    3.66
   1   6   5    3.56    1.85
  -1   6  -6  103.11    5.45
   1   6   6  104.75    6.12
  -1   6  -7   37.89    3.18
   1   6   7   40.12    3.63
  -1   6  -8  113.91    5.62
   1   6   8  119.44    6.26
   1   6   9   46.02    3.58
  -1   6  -9   47.84    3.31
  -1   6 -10   20.09    2.04
  -1   6 -11   88.44    3.93
  -1   7   9    1.57    0.92
   1   7  -9    1.73    0.98
   1   7  -8   56.77    3.68
   1   7  -8   52.34    3.20
  -1   7   8   55.60    3.42
  -1   7   7    1.65    1.32
   1   7  -7    2.06    1.28
   1   7  -7    1.21    1.09
  -1   7   7    1.31    1.19
  -1   7   6    1.82    1.28
  -1   7   5    6.42    1.63
  -1   7   5    5.62    1.78
  -1   7   4    0.45    1.24
   1   7  -4   -0.21    1.30
  -1   7   3   19.04    2.63
   1   7  -3   15.49    2.43
   1   7  -2    3.19    1.61
   1   7  -1    1.16    1.36
   1   7   0   12.41    2.30
   1   7   1    0.70    1.35
   1   7   2    0.94    1.39
   1   7   3    1.52    1.50
   1   7   3    4.60    1.73
   1   7   4    0.67    1.30
   1   7   4    1.72    1.47
   1   7   5   28.34    3.02
   1   7   5   23.65    2.79
   1   7   6   14.64    2.21
   1   7   6   13.10    2.21
  -1   7  -7    4.68    1.33
   1   7   7    9.72    1.85
   1   7   7    6.61    1.60
  -1   7  -8   17.22    1.85
   1   7   8   15.78    2.00
   1   7   8   21.87    2.29
  -1   7  -9    3.78    1.04
   1   7   9    2.79    1.07
  -1   7 -10    6.28    0.96
   1   7  10    3.10    0.82
   1   8  -7    6.28    1.02
  -1   8   7    6.28    1.12
  -1   8   6   32.96    2.39
   1   8  -6   25.25    2.21
  -1   8   5   10.60    1.62
   1   8  -5    8.29    1.52
  -1   8   4    9.12    1.70
   1   8  -3   23.35    2.39
   1   8  -2    4.89    1.33
   1   8  -1    3.38    1.35
   1   8   0   25.36    2.59
   1   8   1    7.39    1.60
   1   8   2    5.70    1.51
   1   8   3   46.98    3.34
   1   8   4    1.72    1.21
   1   8   4    1.78    1.13
   1   8   5    4.24    1.32
   1   8   5    2.38    1.12
   1   8   6    7.07    1.28
   1   8   6    8.53    1.40
   1   8   7   15.34    1.45
   1   8   7   15.96    1.58
   1   8   7   13.88    1.43
   2   0 -15    0.75    0.95
   2   0 -14    2.19    1.31
   2   0 -13   -1.60    1.36
   2   0 -12  351.08   12.30
   2   0 -11   -0.99    1.52
   2   0 -10   84.53    5.22
   2   0  -9    1.04    1.28
   2   0  -9    2.69    2.29
   2   0  -9   -0.46    1.65
   2   0  -8  478.06   18.63
   2   0  -8  470.08   19.62
   2   0  -7   -0.40    1.88
   2   0  -7   -1.03    1.54
   2   0  -6  159.72    8.59
   2   0  -6  193.15    9.64
   2   0  -5    0.25    1.24
  -2   0   5    0.25    1.20
   2   0  -4 1350.00   37.43
   2   0  -3    0.75    1.13
   2   0  -2  327.88   11.24
   2   0  -2  312.31   11.36
  -2   0   2  351.83   11.98
  -2   0   1    3.15    1.43
   2   0  -1    0.67    1.14
  -2   0   0    2.78    1.30
  -2   0  -1    0.63    1.05
  -2   0  -2 2669.09   67.65
  -2   0  -2 2597.77   67.37
  -2   0  -3    0.19    1.14
  -2   0  -3   -0.20    1.18
  -2   0  -4 3464.25   90.62
  -2   0  -4 3597.92   90.50
  -2   0  -5    1.79    1.47
  -2   0  -5   -0.27    1.20
  -2   0  -6  105.81    6.64
  -2   0  -6   99.61    6.54
  -2   0  -7   -0.36    1.48
  -2   0  -8   13.49    3.66
  -2   0  -9    0.48    1.64
  -2   0  -9    0.36    1.45
  -2   0 -10 2049.46   53.96
  -2   0 -11    1.02    1.50
  -2   0 -12   81.75    4.98
  -2   0 -13    1.60    1.48
  -2   0 -14  292.38    9.95
   2   0  15   -0.41    0.70
   2   1 -15    8.44    1.37
   2  -1 -15    9.96    1.41
   2  -1 -14    2.08    1.22
   2   1 -14    3.46    1.31
   2  -1 -13   69.67    4.26
   2   1 -13   67.71    4.20
   2  -1 -12  160.72    7.14
   2  -1 -12  142.95    7.27
   2   1 -12  159.39    7.09
   2  -1 -11   37.31    3.56
   2   1 -11   30.80    3.13
   2  -1 -11   33.76    3.21
  -2  -1  10    6.89    2.92
   2  -1 -10   19.78    2.65
   2   1 -10   18.04    2.47
   2  -1 -10   17.50    2.38
  -2   1  10    0.58    2.54
   2  -1  -9   -0.20    1.57
   2  -1  -9    1.49    2.24
   2   1  -9    2.08    1.52
   2  -1  -9    2.60    1.54
   2  -1  -8   20.88    3.66
  -2   1   8   21.26    3.64
   2  -1  -7  418.84   16.56
  -2   1   7  404.09   16.64
  -2   1   6   27.01    3.61
   2  -1  -6   31.32    3.84
  -2   1   5   19.26    3.03
   2  -1  -5   16.38    2.66
   2  -1  -4  148.57    7.41
  -2   1   4  158.68    7.69
   2  -1  -3  300.59   11.14
   2   1  -3  298.76   10.53
   2   1  -2  332.94   10.87
   2  -1  -2  313.77   11.26
  -2   1   2  318.85   11.23
  -2  -1   2  318.93   11.20
   2   1  -2  338.78   11.61
   2  -1  -2  331.80   11.47
  -2   1   2  307.14   10.80
  -2  -1   1   42.50    3.19
   2   1  -1   41.45    3.18
  -2   1   1   43.37    3.22
   2  -1  -1   40.26    3.21
  -2  -1   0  653.54   19.05
  -2   1   0  634.01   18.95
  -2  -1  -1   60.97    3.66
  -2  -1  -1   61.44    4.04
  -2  -1  -2  175.68    7.66
  -2  -1  -2  180.86    7.38
  -2   1  -2  170.30    7.36
  -2  -1  -3  140.13    7.14
  -2  -1  -3  149.28    6.52
  -2   1  -4  239.74    9.66
  -2  -1  -4  218.00    9.07
  -2  -1  -4  232.20    9.99
  -2   1  -5  107.00    6.32
  -2  -1  -5   99.46    6.56
  -2  -1  -5  102.40    6.05
  -2   1  -6  160.75    8.71
  -2  -1  -6  172.58    8.74
  -2  -1  -6  175.08    9.49
  -2   1  -7   76.63    6.29
  -2  -1  -8   39.43    4.61
  -2   1  -9  105.76    5.49
  -2  -1  -9  102.03    7.99
  -2  -1  -9  105.14    5.42
   2   1  10    1.27    1.38
  -2   1 -10    0.58    1.38
  -2  -1 -10    1.56    1.51
  -2   1 -11   73.93    4.72
   2   1  11   81.62    5.06
  -2  -1 -11   75.47    4.71
  -2   1 -12   59.78    4.23
  -2  -1 -12   64.59    4.31
   2   1  12   72.66    4.65
  -2   1 -13    1.53    1.45
  -2  -1 -13    5.11    1.59
  -2   1 -14    9.60    1.61
  -2  -1 -14    8.70    1.55
   2  -1  15    0.19    0.67
   2   1  15    0.47    0.71
   2  -2 -15   16.21    1.68
   2  -2 -14   44.62    3.27
   2  -2 -13   15.07    2.38
   2  -2 -12    2.24    1.67
   2  -2 -11   15.25    2.46
   2  -2 -10   28.96    3.19
   2  -2  -9  156.42    7.39
  -2   2   9  155.38   10.59
   2   2  -9  151.51    7.69
   2   2  -8   77.04    4.96
   2  -2  -8   68.21    4.47
   2  -2  -8   65.30    6.45
  -2   2   7   76.35    6.84
   2  -2  -7   93.93    7.09
   2  -2  -6   14.71    3.13
  -2   2   6    6.23    3.07
   2  -2  -5  319.70   13.24
  -2   2   5  334.71   13.73
  -2   2   4  170.86    8.65
  -2   2   3  270.08   10.87
   2  -2  -3  295.71   11.23
  -2   2   3  272.24   11.28
  -2   2   2  764.64   23.19
   2  -2  -2  787.72   23.42
   2  -2  -1    1.71    1.47
  -2   2   1    2.31    1.32
  -2   2   1    3.39    1.39
  -2   2   0   13.82    2.03
  -2   2   0   17.52    2.35
  -2   2  -1   14.40    2.02
  -2  -2  -1   16.97    2.57
  -2  -2  -2  166.25    8.21
  -2   2  -2  165.55    7.31
  -2  -2  -3   12.85    2.50
  -2   2  -3   16.63    2.82
  -2  -2  -4   30.35    3.77
  -2   2  -4   28.19    3.32
  -2   2  -5  160.91    8.46
  -2  -2  -5  176.04    9.52
  -2   2  -5  173.98    8.71
  -2   2  -6  354.55   14.71
  -2  -2  -6  391.25   16.21
  -2   2  -7  143.80    8.91
  -2  -2  -7  160.50   10.06
   2   2   8   17.59    2.39
   2   2   8   12.00    2.11
   2   2   9  143.17    6.74
   2   2   9  144.78    7.01
   2   2  10   63.05    4.48
   2   2  10   60.76    4.21
   2   2  11    2.23    1.59
   2   2  11    1.99    1.44
   2   2  12   58.15    4.23
   2   2  12   61.59    4.05
   2   2  13    0.35    1.24
   2   2  14    1.90    1.12
   2   2  15    5.99    1.04
   2  -3 -14   31.08    2.55
   2  -3 -13   21.14    2.58
   2  -3 -12    9.72    2.13
   2  -3 -11   -0.23    1.66
   2  -3 -10   28.05    3.30
   2   3 -10   26.75    3.29
   2  -3  -9   41.53    3.80
   2   3  -9   41.60    4.02
  -2   3   8    0.83    1.46
   2  -3  -8    2.54    1.63
  -2   3   8   -0.53    2.11
   2   3  -8    0.74    1.42
   2  -3  -8   -0.51    2.60
   2  -3  -7   63.86    4.18
   2   3  -7   51.61    3.54
   2   3  -7   53.63    4.15
   2  -3  -7   49.60    5.50
  -2   3   6   14.62    3.18
  -2   3   5  115.45    7.87
  -2   3   4  239.22   11.39
  -2   3   3  227.48   10.47
  -2   3   3  218.64   10.53
  -2   3   2   44.52    4.17
  -2   3   1  148.74    7.53
  -2   3   1  141.15    7.66
  -2  -3   0   48.99    4.32
  -2   3   0   47.76    4.33
  -2   3   0   55.11    4.31
  -2  -3  -1  219.66    9.93
  -2   3  -1  210.87    9.33
  -2   3  -1  203.75    9.53
  -2   3  -2   17.49    2.63
  -2  -3  -2   12.41    2.40
  -2   3  -2   12.93    2.33
  -2  -3  -3  203.92   10.02
  -2   3  -3  181.53    8.99
  -2   3  -3  189.06    9.21
  -2  -3  -4  212.14   10.77
  -2   3  -4  194.46    9.82
  -2  -3  -5   40.46    4.91
  -2   3  -5   42.14    4.49
  -2  -3  -6   19.13    3.59
   2   3   7   10.04    1.98
   2   3   7   10.51    2.04
   2   3   7    9.39    1.82
   2   3   8    4.81    1.69
   2   3   8    5.47    1.73
   2   3   9   36.91    3.51
   2   3   9   43.17    3.65
   2   3  10   67.51    4.71
   2   3  10   68.91    4.57
   2   3  11    7.11    1.81
   2   3  11    3.16    1.46
   2   3  12   54.65    3.93
   2   3  12   57.38    3.85
   2   3  13    7.07    1.56
   2   3  13    6.98    1.49
   2   3  14    2.84    1.04
   2  -4 -14    3.48    1.01
   2  -4 -13   34.68    2.75
  -2   4  13   33.61    2.44
   2  -4 -12   58.27    3.97
   2  -4 -11   22.51    2.69
   2  -4 -10   63.33    4.68
  -2   4  10   61.96    4.49
   2   4 -10   70.97    5.09
   2   4  -9    4.23    1.56
   2   4  -9    4.53    1.85
  -2   4   9    7.24    1.89
   2   4  -8  856.73   25.13
  -2   4   8  887.49   26.10
   2   4  -8  883.41   26.68
  -2   4   7   85.14    5.23
  -2   4   7   78.94    7.62
   2   4  -7   84.79    4.85
   2   4  -7   86.54    5.57
  -2   4   6   25.53    3.11
  -2   4   6   31.57    3.42
   2   4  -5  105.94    5.29
   2   4  -5  118.67    6.06
  -2   4   5   99.01    5.68
  -2   4   5  103.95    5.72
   2  -4  -3  157.39    9.20
  -2   4   3  156.88    9.08
  -2   4   2 3034.76   83.47
  -2   4   2 3133.95   82.87
  -2   4   1  528.99   18.91
  -2   4   1  472.59   19.02
  -2   4   0 1943.75   53.31
  -2   4   0 1827.13   53.77
  -2   4  -1  292.38   12.65
  -2   4  -1  255.33   12.46
  -2   4  -2  524.04   18.43
  -2   4  -2  400.01   17.25
  -2   4  -3   19.59    3.35
  -2   4  -4   11.26    2.80
   2   4   5  439.42   14.83
  -2   4  -5  440.66   18.59
   2   4   6  426.20   14.51
  -2   4  -6  395.39   18.17
   2   4   7    9.68    2.17
   2   4   7    9.50    2.09
   2   4   8   71.27    4.98
   2   4   8   71.71    5.17
   2   4   9    6.16    1.82
   2   4   9    7.05    1.85
   2   4  10  200.52    8.61
  -2   4 -10  202.53    8.06
   2   4  10  212.31    8.60
   2   4  11    6.69    1.69
   2   4  11    6.59    1.67
   2   4  12   46.39    3.29
   2   4  12   49.92    3.37
   2   4  13    9.32    1.47
   2   4  13    9.23    1.43
  -2   5  13    1.47    0.74
  -2   5  12   21.56    1.97
  -2   5  11    2.32    1.37
  -2   5  10   16.63    2.29
   2   5 -10   14.47    2.09
   2   5 -10   12.79    2.25
   2   5  -9    5.27    1.64
  -2   5   9    1.92    1.48
   2   5  -9    2.46    1.63
   2   5  -8   83.65    4.91
  -2   5   8   85.26    5.14
  -2   5   8   83.58    5.31
   2   5  -8   89.64    5.82
  -2   5   7    1.39    1.57
   2   5  -7    1.54    1.58
  -2   5   7    1.76    1.53
  -2   5   7    1.54    1.51
   2   5  -7    2.13    1.63
  -2   5   6    7.00    2.06
  -2   5   6    8.99    2.03
   2   5  -6    9.30    1.90
  -2   5   6    6.60    2.02
  -2   5   5    0.49    1.36
   2   5  -5   -0.73    1.27
  -2   5   5    0.45    1.28
   2   5  -5    0.45    1.22
  -2   5   5   -0.44    1.39
  -2   5   4    5.18    1.89
   2  -5  -4    3.06    2.30
   2   5  -4    7.84    1.74
  -2   5   4    5.86    1.77
   2   5  -4    4.87    1.71
  -2   5   4    8.23    2.66
   2   5  -3  117.24    6.20
  -2   5   3  121.49    6.29
   2  -5  -3  118.66    9.07
  -2   5   3  125.81    9.11
  -2   5   3  124.92    6.52
  -2   5   2   43.09    5.23
   2   5  -2   37.03    3.37
   2  -5  -2   46.25    5.49
  -2   5   2   48.14    3.59
  -2   5   2   39.08    3.49
  -2   5   1    1.84    1.71
  -2   5   1   -0.21    1.49
   2   5  -1    0.63    1.14
  -2   5   0   10.07    2.73
  -2   5   0   10.61    2.06
   2   5   0   10.61    2.03
  -2   5  -1    6.00    2.34
  -2   5  -1    7.69    1.76
   2   5   1    6.25    1.60
  -2   5  -2    4.25    2.24
  -2   5  -2    6.47    1.70
  -2   5  -3   30.50    4.59
   2   5   3   24.99    3.03
   2   5   4    6.53    1.94
   2   5   5    0.70    1.39
   2   5   6   34.57    3.55
   2   5   7   17.40    2.74
   2   5   8   27.50    3.25
   2   5   9    8.42    1.83
  -2   5  -9    7.32    1.64
   2   5   9    6.26    1.87
   2   5  10   22.63    2.38
  -2   5 -10   24.79    2.43
  -2   5 -11  118.80    5.08
   2   5  11  122.04    5.33
   2   5  12    9.60    1.37
  -2   6  11   28.59    1.94
   2   6 -10    0.31    0.93
  -2   6   9   40.53    3.27
   2   6  -9   37.69    3.35
   2   6  -8    5.74    1.59
  -2   6   8    7.59    1.92
   2   6  -8    9.68    2.04
  -2   6   7   -0.23    1.45
   2   6  -7    0.48    1.41
   2   6  -7    1.21    1.31
  -2   6   7   -0.20    1.45
   2   6  -6   37.52    3.21
  -2   6   6   44.04    3.65
  -2   6   6   37.83    3.70
  -2   6   5   10.02    2.24
   2   6  -5   10.28    1.93
  -2   6   5    8.53    1.98
   2   6  -5    9.95    2.05
  -2   6   4   60.55    4.34
   2   6  -4   49.28    4.06
  -2   6   4   48.71    4.20
   2   6  -3   23.57    3.02
  -2   6   3   13.59    2.34
  -2   6   3   20.73    2.97
  -2   6   2   29.40    3.04
   2   6  -2   28.59    3.15
  -2   6   2   26.35    3.11
   2   6  -1   38.66    3.71
  -2   6   1   47.12    3.99
  -2   6   0    1.87    1.51
   2   6   0    1.18    1.56
   2   6   1   60.11    4.45
  -2   6  -1   55.54    4.26
   2   6   2    4.95    1.74
   2   6   3  152.80    7.42
   2   6   3  137.85    7.16
   2   6   4   14.82    2.58
   2   6   4   13.43    2.34
   2   6   5    6.31    1.81
   2   6   5    7.11    2.05
  -2   6  -6    5.50    1.67
   2   6   6    5.10    1.95
  -2   6  -7    6.61    1.62
   2   6   7    5.69    1.87
   2   6   8   19.25    2.59
  -2   6  -8   23.84    2.39
  -2   6  -9  101.58    4.71
   2   6   9   96.50    5.13
  -2   6 -10    7.61    1.31
  -2   6 -11    6.14    1.06
   2   7  -9   12.43    1.59
   2   7  -8    6.57    1.43
   2   7  -7    3.26    1.35
   2   7  -6    4.68    1.54
  -2   7   5   26.98    2.98
   2   7  -4   28.30    2.90
  -2   7   4   28.13    3.03
  -2   7   3    2.43    1.46
   2   7  -3    2.71    1.49
  -2   7   2    5.35    1.80
   2   7  -2    6.64    1.83
  -2   7   1    6.60    1.80
   2   7  -1    7.85    1.92
   2   7   0   50.50    3.99
  -2   7   0   49.37    3.94
   2   7   1    1.96    1.31
   2   7   2   11.12    2.09
   2   7   3    6.00    1.70
   2   7   4   10.41    1.98
   2   7   4    7.53    1.92
   2   7   5   45.88    3.60
   2   7   5   42.07    3.35
   2   7   6    1.62    1.17
   2   7   6    1.61    1.34
  -2   7  -7    1.67    1.06
   2   7   7   -0.16    1.22
   2   7   8   10.41    1.62
  -2   7  -8   11.09    1.40
  -2   7  -9    5.15    0.98
   2   7   9    3.48    1.02
  -2   8   6    5.73    1.14
   2   8  -6    3.89    1.03
  -2   8   5   11.81    1.68
   2   8  -5   22.76    2.07
  -2   8   3   69.73    3.88
   2   8  -2   32.57    2.65
   2   8  -1   12.52    1.77
   2   8   0    5.80    1.34
   2   8   1   33.09    2.69
   2   8   2   21.56    2.30
   2   8   2   25.29    2.28
   2   8   3   73.96    3.91
   2   8   3   72.49    4.01
   2   8   4   86.22    4.05
   2   8   4   86.84    4.28
   2   8   5  109.60    4.78
   2   8   5  120.22    4.71
   2   8   5  126.73    4.99
   2   8   6    0.95    0.80
   2   8   6   -0.09    0.82
   3   0 -15    8.42    1.11
   3   0 -14    1.17    0.96
   3   0 -13   72.94    4.13
   3   0 -12   -1.45    1.46
   3   0 -11   42.67    3.59
   3   0 -10   -0.40    1.47
   3   0  -9  306.41   11.20
  -3   0   8   -0.53    1.97
  -3   0   7  181.05   10.90
   3   0  -7  181.43   10.58
   3   0  -6    1.54    1.64
  -3   0   6    1.67    1.72
  -3   0   5   14.96    3.05
  -3   0   5   17.44    3.40
   3   0  -4    1.25    1.48
  -3   0   4   -1.67    1.58
  -3   0   3 1691.47   48.13
   3   0  -3 1753.48   47.95
   3   0  -2    0.29    1.34
   3   0  -2    0.53    1.46
  -3   0   2    1.14    1.34
   3   0  -1   26.56    3.34
  -3   0   1   33.94    3.83
   3   0   0   -0.82    1.23
  -3   0  -1  274.12   11.01
  -3   0  -1  286.45   11.43
  -3   0  -2    0.76    1.38
  -3   0  -2   -2.17    1.48
  -3   0  -3   31.93    3.73
  -3   0  -4   -0.30    1.39
  -3   0  -5  583.49   20.60
  -3   0  -6    0.39    1.50
  -3   0  -7  139.55    9.15
  -3   0  -8   -0.37    1.26
  -3   0  -9    0.99    1.64
  -3   0 -10   -1.42    1.50
  -3   0 -11  122.89    6.14
  -3   0 -12   -0.54    1.27
   3   0  13    0.30    1.01
   3   0  14   -0.45    0.82
   3   0  15    0.33    0.55
   3   1 -14   46.20    2.86
   3  -1 -14   51.57    2.99
   3   1 -13   45.08    3.22
   3  -1 -13   52.82    3.38
   3   1 -12   20.84    2.45
   3  -1 -12   26.40    2.71
   3  -1 -12   28.22    2.99
   3  -1 -11   16.42    2.59
   3   1 -11   13.95    2.16
   3  -1 -11   15.86    2.26
   3  -1 -10    0.67    1.50
   3   1 -10    1.96    1.33
   3  -1 -10   -0.20    1.30
   3  -1  -9    8.72    2.23
   3   1  -9   11.79    2.14
   3  -1  -9   13.30    2.18
   3  -1  -8    2.05    2.18
  -3  -1   8    5.84    2.51
  -3   1   8    0.53    1.97
   3  -1  -8    4.51    1.72
   3  -1  -7   90.03    7.38
  -3   1   7   75.79    6.91
  -3  -1   7   75.46    6.97
  -3   1   7   76.08    6.98
   3  -1  -6   89.99    7.16
  -3   1   6   96.10    7.42
  -3   1   6   79.30    6.74
  -3  -1   6  100.22    7.42
  -3   1   5  122.97    8.02
  -3  -1   5  126.34    8.09
  -3   1   5  111.39    7.64
   3  -1  -4   12.92    2.74
  -3  -1   4   14.87    2.90
  -3   1   4   12.14    2.93
  -3  -1   3   49.98    4.82
  -3   1   3   57.30    5.23
   3  -1  -3   59.33    4.95
   3   1  -2   34.30    3.62
   3  -1  -2   30.37    3.45
  -3   1   2   35.18    3.74
  -3  -1   2   32.61    3.63
   3  -1  -2   42.50    4.00
   3   1  -2   29.62    3.30
   3   1  -1   16.52    2.76
   3  -1  -1   17.55    2.62
  -3   1   1   16.35    2.73
  -3  -1   1   15.52    2.74
   3   1   0    2.22    1.60
   3  -1   0   -0.28    1.24
  -3  -1  -1   57.69    4.76
  -3  -1  -1   60.26    4.73
  -3   1  -1   56.49    4.45
  -3  -1  -2    2.20    1.50
  -3   1  -2    2.48    1.56
  -3  -1  -2    4.17    1.99
  -3  -1  -3  750.87   24.71
  -3   1  -3  749.23   24.76
  -3  -1  -3  782.20   24.92
  -3  -1  -4  200.78   10.25
  -3   1  -5   29.19    3.84
  -3  -1  -5   36.89    4.45
  -3   1  -6   68.43    6.02
  -3  -1  -6   75.49    6.73
  -3   1  -7   34.43    2.93
  -3  -1  -7   32.41    3.00
   3   1   7   38.47    3.22
   3   1   7   37.53    3.09
  -3   1  -7   33.99    4.77
  -3  -1  -7   37.79    5.06
   3   1   8    5.09    1.62
  -3   1  -8    3.32    1.54
  -3  -1  -8    5.59    1.67
  -3   1  -8    6.61    2.57
   3   1   8    3.58    1.53
  -3   1  -9  270.34   10.06
   3   1   9  250.08   10.10
  -3  -1  -9  270.66   10.03
   3   1   9  248.41    9.77
   3   1  10    9.25    1.96
  -3   1 -10   10.13    2.05
  -3  -1 -10    8.22    1.89
  -3   1 -11   37.72    3.22
  -3  -1 -11   31.26    3.02
   3   1  11   27.62    2.90
   3  -1  12   32.01    2.86
   3   1  12   29.53    2.77
   3  -1  13   12.23    1.74
   3   1  13   12.43    1.76
   3  -1  14    0.41    0.85
   3   1  14   -0.10    0.74
   3  -2 -14   11.50    1.60
   3  -2 -13   64.16    4.00
   3  -2 -12    3.58    1.60
   3  -2 -11   18.88    2.70
   3  -2 -10   73.74    5.00
   3  -2  -9  659.55   20.66
  -3   2   8  133.40   10.24
   3  -2  -8  156.13    7.26
   3  -2  -8  122.68    9.65
  -3   2   7   59.18    6.59
   3  -2  -7   70.69    4.57
   3  -2  -7   74.46    6.93
   3  -2  -6   52.55    5.66
  -3   2   6   61.22    6.09
  -3   2   5  216.63   11.72
  -3   2   4   42.11    4.73
   3  -2  -4   44.14    4.73
   3  -2  -3  399.07   15.81
   3  -2  -2  326.00   13.20
  -3   2   2  300.10   12.56
   3  -2  -1  704.44   22.34
  -3   2   1  641.64   22.09
  -3  -2   0  527.39   19.07
  -3   2   0  537.20   18.75
  -3  -2  -1  133.44    7.97
  -3  -2  -2  160.24    9.11
  -3  -2  -3 1114.04   34.47
  -3  -2  -4   30.31    4.12
  -3   2  -5   31.10    4.07
  -3  -2  -5   34.65    4.64
  -3   2  -6   40.66    4.84
  -3  -2  -6   38.76    5.15
   3   2   7  138.29    6.67
  -3   2  -7  137.42    9.48
  -3  -2  -7  146.95   10.27
   3   2   7  124.50    6.73
   3   2   7  138.50    6.43
   3   2   8  105.97    5.85
   3   2   8  106.70    5.69
   3   2   9  718.12   21.90
   3   2   9  706.20   21.50
   3   2  10   48.21    3.95
   3   2  10   49.61    3.86
   3   2  11  158.16    7.34
   3   2  12    2.15    1.28
   3   2  13  242.54    8.62
   3   2  14   14.49    1.54
   3  -3 -14    1.00    0.82
   3  -3 -13   49.26    3.27
   3  -3 -12   13.47    2.20
   3  -3 -11    5.40    1.91
   3  -3 -10   49.33    4.10
   3  -3  -9  158.56    7.63
  -3   3   9  149.76    7.32
   3   3  -9  148.28    7.68
   3  -3  -8    3.58    1.85
  -3   3   7   15.36    3.79
   3  -3  -7   19.72    2.61
   3  -3  -7   18.08    3.79
  -3   3   6    2.72    2.10
  -3   3   6    0.60    1.19
  -3   3   5  114.71    8.76
  -3   3   5  119.71    6.04
  -3   3   4   68.72    6.27
  -3   3   3   51.09    5.18
  -3   3   3   41.30    4.76
  -3   3   2    3.46    1.78
  -3  -3   1   90.44    6.75
  -3   3   1   87.14    6.62
  -3  -3   0  114.71    7.73
  -3   3   0  111.70    7.48
  -3  -3  -1   32.34    4.29
  -3   3  -1   30.14    3.83
  -3  -3  -2   10.83    2.70
  -3   3  -2   11.56    2.53
  -3  -3  -3   17.69    3.51
  -3   3  -3   21.37    3.44
  -3  -3  -4   26.06    4.19
   3   3   5   19.05    2.37
   3   3   5   22.69    2.81
   3   3   5   21.06    2.46
  -3  -3  -5   26.11    4.43
   3   3   6   52.60    3.88
   3   3   6   46.25    3.57
   3   3   6   42.37    3.77
   3   3   7   14.67    2.32
   3   3   7   14.68    2.56
   3   3   7   13.03    2.18
   3   3   8   19.90    2.71
   3   3   8   25.80    2.82
   3   3   8   23.71    3.05
   3   3   9   16.58    2.52
   3   3   9   21.26    2.69
   3   3  10    0.64    1.40
   3   3  10    1.39    1.33
   3   3  11   54.75    3.89
   3   3  11   51.49    3.65
   3   3  12    9.57    1.73
   3   3  13    2.27    0.96
   3   3  14    2.42    0.76
   3  -4 -13   15.28    1.56
  -3   4  13   12.26    1.38
   3  -4 -12   -1.38    1.27
   3  -4 -11   11.04    2.01
   3  -4 -10   28.22    2.96
  -3   4  10   23.09    2.72
   3  -4  -9    8.85    2.19
  -3   4   9   10.79    2.15
   3   4  -9   11.75    2.36
  -3   4   8    0.91    1.44
   3   4  -8    0.76    1.48
  -3   4   7   81.86    5.12
   3   4  -7   81.25    5.50
  -3   4   6   -0.44    1.39
  -3   4   5  110.86    6.09
  -3   4   4   14.25    2.22
   3  -4  -3   37.66    3.24
  -3   4   3   35.46    3.24
  -3   4   3   38.50    5.04
  -3   4   3   35.20    3.27
  -3   4   2   25.86    2.93
  -3   4   2   22.68    2.66
  -3   4   2   25.36    4.21
  -3   4   1    8.25    2.00
  -3   4   1   10.75    2.77
  -3   4   0   16.04    2.22
  -3   4   0   17.80    3.46
  -3   4  -1  100.28    5.38
  -3   4  -1   85.66    7.45
  -3   4  -2  109.97    5.92
  -3   4  -2  109.81    8.26
   3   4   3   10.57    2.16
   3   4   4   -0.90    1.63
   3   4   5    5.21    2.03
   3   4   6   37.83    3.66
   3   4   7  250.98   10.46
   3   4   7  237.52    9.48
   3   4   8    7.83    1.85
   3   4   8    6.13    1.97
   3   4   8    9.05    1.94
   3   4   9  159.68    7.33
   3   4   9  154.42    7.57
   3   4   9  164.27    7.21
   3   4  10   12.47    2.03
   3   4  10   10.17    1.86
   3   4  11   -0.16    1.02
   3   4  12   15.80    1.74
   3   4  13    0.24    0.64
  -3   5  12    4.02    0.85
  -3   5  11    4.67    1.24
  -3   5  10   75.59    4.31
  -3   5   9   -0.19    1.29
   3   5  -9   -0.21    1.26
  -3   5   8    0.19    1.21
  -3   5   8    1.87    1.44
   3   5  -8    0.93    1.44
  -3   5   7    9.80    1.96
  -3   5   7    8.16    1.88
   3   5  -7   10.80    2.15
  -3   5   6   39.79    3.60
  -3   5   6   35.64    3.45
   3   5  -6   41.02    3.82
  -3   5   6   38.52    3.71
  -3   5   5    2.19    1.55
  -3   5   5    2.29    1.54
  -3   5   5    1.12    1.62
  -3   5   4  218.53    9.16
  -3   5   4  191.32    8.98
  -3   5   3   17.73    2.65
  -3   5   3   12.61    2.25
  -3   5   2   37.94    3.39
  -3   5   2   39.27    3.66
  -3   5   1    2.30    1.54
   3   5  -1   -0.22    1.37
  -3   5   0   64.27    4.68
  -3   5  -1    1.13    1.34
  -3   5  -2    0.68    1.42
  -3   5  -3   44.26    3.88
   3   5   3   47.36    3.93
  -3   5  -4   33.84    3.46
   3   5   4   27.22    3.23
  -3   5  -5    3.79    1.66
   3   5   5    1.72    1.68
  -3   5  -6    1.72    1.46
   3   5   6    0.25    1.61
   3   5   7    0.72    1.56
   3   5   8   12.22    2.31
  -3   5  -9   32.10    2.69
   3   5   9   31.79    3.05
  -3   5 -10   68.78    3.64
  -3   5 -11    1.41    0.80
  -3   6  10    5.07    1.16
  -3   6   9   65.28    3.69
   3   6  -9   60.22    3.74
  -3   6   8    5.92    1.53
   3   6  -8    4.06    1.51
  -3   6   7   -0.19    1.25
  -3   6   7   -0.17    1.34
   3   6  -7    1.61    1.39
  -3   6   6   18.81    2.61
  -3   6   6   22.96    2.57
  -3   6   6   22.24    2.64
   3   6  -6   24.74    2.86
  -3   6   5   74.56    4.81
  -3   6   5   73.17    5.00
  -3   6   4  244.10    9.67
  -3   6   4  228.95    9.88
  -3   6   3   39.82    3.54
  -3   6   3   31.17    3.47
  -3   6   2  702.99   21.58
  -3   6   2  724.19   22.29
  -3   6   1  309.73   11.91
  -3   6   0   18.80    2.71
   3   6   0   18.30    2.80
   3   6   1   56.07    4.45
  -3   6  -1   49.77    4.18
  -3   6  -2   77.81    5.23
  -3   6  -3  254.15   10.13
  -3   6  -4  595.43   18.08
   3   6   4  528.75   17.97
   3   6   5    7.96    2.16
   3   6   5   10.14    2.23
   3   6   6    8.68    2.11
   3   6   6   12.51    2.14
  -3   6  -7   22.39    2.25
   3   6   7   18.20    2.49
  -3   6  -8   16.14    1.83
   3   6   8   13.30    2.09
  -3   6  -9   23.60    1.98
  -3   6 -10   -0.60    0.77
   3   7  -8    3.69    0.93
   3   7  -7    3.83    1.14
   3   7  -6    6.17    1.48
  -3   7   5    5.72    1.55
   3   7  -5    6.46    1.56
  -3   7   4   68.48    4.37
  -3   7   3   58.11    4.04
  -3   7   2   16.91    2.48
   3   7  -2   17.95    2.27
  -3   7   1   45.32    3.66
  -3   7   0   19.42    2.51
   3   7   0   22.41    2.64
  -3   7  -1   12.26    2.17
   3   7   1    9.52    2.09
   3   7   2   60.29    4.09
  -3   7  -2   52.12    3.79
   3   7   3    1.28    1.50
   3   7   4    1.03    1.44
   3   7   5   22.93    2.39
   3   7   5   28.11    2.59
   3   7   6   22.01    2.24
   3   7   6   20.90    2.13
   3   7   7    3.55    1.22
  -3   8   3    0.62    0.81
   3   8  -3   -0.39    0.75
  -3   8   2   17.75    1.82
  -3   8   1    5.53    1.20
  -3   8   0    3.52    1.07
   3   8   0    2.27    1.07
   3   8   1   -0.35    0.93
   3   8   2   35.89    2.54
   3   8   2   34.15    2.39
   3   8   3    0.51    0.80
   3   8   3   -0.10    0.83
   3   8   4   22.72    1.78
   3   8   4   22.80    1.78
   4   0 -14    1.29    0.78
   4   0 -13    1.11    1.06
   4   0 -12    9.22    1.68
   4   0 -11   -0.52    1.27
   4   0 -10  721.10   21.54
   4   0  -9    1.40    1.37
   4   0  -8  437.24   14.89
   4   0  -7   -0.21    1.38
   4   0  -6   26.91    4.68
  -4   0   6   50.77    6.05
   4   0  -5    1.41    1.61
  -4   0   5    0.51    2.09
  -4   0   4  361.16   16.54
   4   0  -4  374.61   16.41
   4   0  -3    0.42    1.66
  -4   0   3    0.45    1.89
   4   0  -2 1600.05   48.80
  -4   0   2 1693.61   48.96
   4   0  -2 1650.90   48.15
   4   0  -1    0.42    1.50
   4   0   0  141.54    8.99
  -4   0   0  116.28    7.83
   4   0   1    0.42    1.63
  -4   0  -1    0.39    1.59
  -4   0  -2  406.16   16.77
  -4   0  -3    0.42    1.58
  -4   0  -4   24.79    3.88
   4   0   5   -0.18    1.09
  -4   0  -5    0.45    1.67
  -4   0  -6  441.98   19.15
   4   0   6  456.39   14.83
   4   0   7    0.40    1.13
   4   0   8  148.56    7.01
   4   0   9    0.41    1.25
   4   0  10  181.53    7.74
   4   0  11    1.03    1.12
   4   0  12  190.75    7.29
   4   0  13   -0.10    0.81
   4   1 -13    8.02    1.34
   4  -1 -13   11.76    1.45
   4  -1 -12   15.22    2.08
   4   1 -12   15.85    1.92
   4  -1 -12   15.04    1.91
   4  -1 -11    9.73    1.92
   4   1 -11    7.34    1.71
   4  -1 -11    8.50    1.67
   4   1 -10   80.97    4.84
   4  -1 -10   81.26    4.78
   4  -1 -10   79.96    5.05
   4   1  -9   69.12    4.56
   4  -1  -9   76.81    4.74
   4  -1  -9   82.57    5.14
   4  -1  -8   -0.23    1.54
   4  -1  -7   10.54    2.25
   4  -1  -6   26.01    4.49
  -4   1   6   18.64    3.92
   4  -1  -6   25.19    2.84
  -4  -1   6   20.79    4.03
  -4   1   6   22.89    4.13
  -4   1   5   53.20    6.04
  -4  -1   5   68.63    6.75
  -4   1   5   55.55    6.15
   4  -1  -4    0.47    1.88
  -4   1   4   -0.95    2.08
  -4  -1   4    0.95    2.08
  -4  -1   3   42.11    5.09
   4  -1  -3   40.59    4.87
  -4   1   3   34.42    4.78
   4   1  -2   16.54    3.33
   4  -1  -2   15.59    3.12
   4  -1  -2   17.94    3.39
   4   1  -1   37.22    4.53
   4  -1  -1   27.34    3.92
   4  -1  -1   25.43    3.77
   4   1   0   19.31    3.38
   4  -1   0   16.27    3.28
  -4  -1   0   14.68    3.06
  -4  -1   0   16.08    2.88
  -4   1   0   19.91    3.31
   4   1   1   -0.43    1.70
   4  -1   1    0.42    1.64
  -4  -1  -1   -0.39    1.55
  -4   1  -1    0.78    1.61
  -4  -1  -1    2.87    2.16
  -4  -1  -2  204.22   10.84
  -4   1  -2  208.17   10.95
  -4  -1  -2  196.38   10.97
  -4  -1  -3  178.07   10.23
  -4   1  -3  170.31   10.02
  -4  -1  -3  161.08   10.03
  -4  -1  -4   41.95    5.04
   4   1   5   45.11    3.56
  -4   1  -5   46.49    5.32
   4  -1   5   42.49    3.29
   4   1   5   45.08    3.35
   4   1   6    7.83    1.86
   4  -1   6    7.78    1.68
   4   1   6    4.96    1.53
  -4   1  -6    5.13    2.43
   4   1   7    8.11    1.92
   4  -1   7   12.85    1.99
   4   1   7    9.15    1.79
   4   1   8   49.81    3.90
   4  -1   8   40.90    3.50
   4   1   8   49.85    3.78
   4   1   9  133.22    6.48
   4  -1   9  116.60    6.09
   4   1   9  121.47    6.19
   4   1  10   12.42    2.07
   4  -1  10    9.48    1.85
   4  -1  11   28.75    2.63
   4   1  11   26.62    2.59
   4  -1  12    6.08    1.33
   4   1  12    6.65    1.36
   4  -1  13    4.85    1.01
   4   1  13    4.59    1.01
   4  -2 -13   19.56    1.90
   4  -2 -12   17.36    2.12
   4  -2 -11    3.53    1.52
   4  -2 -10  117.08    6.17
   4  -2  -9    3.59    1.71
   4  -2  -8   -0.69    1.50
   4  -2  -7  106.78    6.05
   4  -2  -6   26.37    4.79
  -4   2   6   35.54    5.27
   4  -2  -6   25.21    2.94
  -4   2   5    0.56    1.91
   4  -2  -5   -0.83    1.48
  -4   2   5    0.83    1.21
  -4   2   4  279.66   14.72
   4  -2  -4  253.28   14.09
   4  -2  -4  267.72   10.34
  -4   2   4  287.69   10.60
   4  -2  -3   92.12    5.18
   4  -2  -3   94.35    7.63
  -4   2   3   93.62    5.20
   4  -2  -2    8.10    2.79
   4  -2  -1   35.75    4.62
  -4  -2   1   26.21    4.70
  -4   2   1   31.85    4.25
   4  -2   0   24.46    3.75
  -4  -2   0   29.29    4.42
  -4   2   0   29.26    4.10
  -4  -2  -1  315.94   15.31
  -4   2  -1  328.42   15.09
  -4  -2  -2   62.88    6.22
   4   2   3   24.26    2.73
  -4  -2  -3   25.61    4.32
   4   2   4   41.60    3.49
  -4  -2  -4   35.82    5.15
   4   2   5   17.64    2.43
  -4   2  -5   14.54    3.34
  -4  -2  -5   21.35    4.15
   4   2   6    9.82    2.02
   4   2   7  311.69   11.72
   4   2   8   47.06    3.88
   4   2   9    1.28    1.38
   4   2  10    3.50    1.47
   4   2  11   42.76    3.24
   4   2  12    1.55    1.01
   4   2  13    1.55    0.75
   4  -3 -13    7.90    1.18
   4  -3 -12    8.73    1.57
   4  -3 -11   51.02    3.59
   4  -3 -10   15.90    2.32
   4  -3  -9    5.04    1.77
   4  -3  -8    0.88    1.54
   4  -3  -7   85.43    5.37
   4  -3  -6    0.22    1.35
  -4   3   6    0.67    1.26
  -4   3   5   63.30    4.52
  -4   3   4   64.93    6.86
   4  -3  -4   64.56    4.55
  -4   3   4   68.47    4.63
  -4   3   3   17.53    3.67
   4  -3  -3   21.63    2.63
   4   3  -3   21.03    2.70
  -4   3   3   20.02    2.68
   4  -3  -2   17.84    2.42
  -4  -3   2   17.17    3.86
   4   3  -2   19.24    2.57
  -4   3   2   21.08    2.60
   4   3  -2   12.84    2.38
  -4   3   2   12.79    3.16
   4   3  -1    2.38    1.78
   4  -3  -1    1.43    1.29
  -4  -3   1   -0.53    2.04
   4   3  -1    2.90    1.51
  -4   3   1    1.82    1.37
  -4   3   1    3.41    1.95
   4  -3   0   11.21    1.97
  -4  -3   0    5.81    2.68
   4   3   0   14.64    2.39
   4   3   0   11.09    2.17
  -4   3   0    8.76    2.67
   4  -3   1   29.89    2.95
   4   3   1   30.36    3.09
   4   3   1   33.34    3.32
  -4  -3  -1   23.56    4.27
  -4   3  -1   24.80    4.06
   4   3   2   17.06    2.29
   4   3   2   21.29    2.62
  -4  -3  -2   25.17    4.40
   4   3   2   18.23    2.56
  -4   3  -2   14.19    3.08
   4   3   3   60.06    4.09
  -4  -3  -3   53.49    6.36
   4   3   3   55.89    4.19
   4   3   3   56.08    4.17
  -4   3  -3   41.09    5.35
   4   3   4   59.55    4.21
  -4   3  -4   47.30    5.98
   4   3   4   59.30    4.53
   4   3   5   60.01    4.36
   4   3   6   16.66    2.43
   4   3   7   56.51    4.20
   4   3   8    1.94    1.48
   4   3   9  204.68    8.53
   4   3  10    5.49    1.51
   4   3  11    7.56    1.48
   4   3  12    0.32    0.81
   4  -4 -11    2.53    1.14
   4  -4 -10   33.70    2.84
  -4   4  10   38.77    2.93
  -4   4   9    2.54    1.44
  -4   4   8    9.46    2.02
  -4   4   7   10.09    1.99
  -4   4   6   73.62    4.91
  -4   4   5   62.14    4.55
  -4   4   4  143.73    7.23
   4  -4  -3  165.13    7.67
   4   4  -3  164.50    7.90
  -4   4   3  150.38    7.56
   4  -4  -2    8.40    2.55
   4   4  -2    5.06    2.28
  -4   4   2    2.68    1.78
  -4   4   1  101.02    5.82
   4  -4  -1  111.83    6.02
   4   4  -1  103.53    6.14
  -4   4   1  108.48    5.89
   4   4  -1   94.91    5.92
  -4   4   0    8.13    1.89
   4  -4   0   11.05    2.13
   4   4   0   12.56    2.41
  -4   4  -1    1.78    1.81
   4  -4   1    2.16    1.58
   4   4   1    0.72    1.69
  -4   4  -2 1128.99   31.88
   4  -4   2 1105.31   31.55
   4   4   2 1097.87   31.96
  -4   4  -3  206.65    8.97
   4   4   3  201.94    9.02
   4   4   4  160.91    7.94
   4   4   4  164.25    7.82
   4   4   5    2.00    1.57
   4   4   6   52.47    3.91
   4   4   6   48.57    4.22
   4   4   7   54.79    3.98
   4   4   8  184.53    7.80
   4   4   9   91.45    4.82
   4   4  10  142.14    5.91
   4   4  11    8.69    1.32
  -4   5  10    0.85    0.91
  -4   5   9   26.29    2.39
  -4   5   8    2.30    1.09
  -4   5   8    3.65    1.44
  -4   5   7    5.25    1.54
  -4   5   7    2.60    1.41
  -4   5   6   92.66    5.31
  -4   5   6   88.33    5.23
  -4   5   5   -0.43    1.42
  -4   5   4   21.45    2.68
  -4   5   3   50.85    4.05
  -4   5   3   48.67    4.05
   4   5  -2  202.47    8.95
  -4   5   2  190.73    8.37
  -4   5   2  183.32    8.50
  -4   5   1    1.63    1.62
   4   5  -1    0.25    1.51
   4   5  -1    2.11    1.76
  -4   5   0    3.27    1.64
   4   5   0    1.20    1.72
  -4   5  -1   88.65    5.46
   4   5   1   93.70    5.79
  -4   5  -2   75.71    5.09
   4   5   2   81.33    5.41
  -4   5  -3   11.40    2.25
   4   5   3   11.34    2.29
  -4   5  -4   14.03    2.35
   4   5   4   14.27    2.51
   4   5   4   16.73    2.55
  -4   5  -5   53.01    4.00
   4   5   5   41.02    3.79
   4   5   5   44.13    3.73
  -4   5  -6   29.37    2.96
  -4   5  -7    1.07    1.30
  -4   5  -8   -0.30    1.07
  -4   5  -9    8.88    1.34
  -4   5 -10    3.47    0.89
  -4   6   8    3.83    1.10
  -4   6   7   19.17    2.06
  -4   6   6   -0.75    0.99
  -4   6   6   -0.70    1.19
  -4   6   5   10.84    1.96
  -4   6   5   16.97    2.15
  -4   6   4    1.73    1.37
  -4   6   4    1.41    1.12
  -4   6   3   20.56    2.60
  -4   6   3   14.31    2.05
  -4   6   2    0.63    1.36
   4   6  -2   -0.61    1.30
  -4   6   1   -0.21    1.32
   4   6  -1   -0.64    1.37
   4   6  -1    0.60    1.43
  -4   6   0    6.84    1.83
   4   6   0    8.10    1.98
   4   6   0    8.74    2.04
  -4   6  -1   12.86    2.21
   4   6   1   13.07    2.28
  -4   6  -2   16.35    2.36
   4   6   2   16.05    2.45
  -4   6  -3   14.00    2.11
   4   6   3   12.18    2.18
   4   6   3   14.22    2.34
  -4   6  -4    5.78    1.57
   4   6   4    9.07    1.83
   4   6   4    6.89    1.86
  -4   6  -5   23.61    2.46
   4   6   5   20.27    2.42
  -4   6  -6   18.54    2.05
  -4   6  -7   27.78    2.09
  -4   6  -8   24.94    1.80
  -4   7   5    8.81    1.33
  -4   7   4   22.50    2.16
  -4   7   3   43.20    3.00
  -4   7   2    3.69    1.30
  -4   7   1    0.91    1.10
   4   7  -1    0.14    1.05
  -4   7   0   -1.07    1.11
   4   7   0   -0.15    1.07
   4   7   0    0.27    1.04
  -4   7  -1    4.30    1.33
   4   7   1    4.50    1.38
   4   7   1    1.56    1.15
   4   7   2   18.40    2.13
   4   7   2   17.03    2.01
  -4   7  -2   18.02    2.03
  -4   7  -3    1.53    1.09
   4   7   3    2.36    1.13
   4   7   3    1.84    1.18
   4   7   4   14.11    1.66
   4   7   4   14.73    1.70
  -4   7  -4   14.59    1.64
   4   7   5   16.88    1.66
   5   0 -12   -0.09    0.74
   5   0 -11   21.81    2.11
   5   0 -10   -0.61    1.12
   5   0  -9    6.80    1.59
   5   0  -8    1.02    1.34
   5   0  -7  107.53    5.99
   5   0  -6    0.44    1.43
   5   0  -5   63.29    4.69
   5   0  -4   -0.99    1.49
   5   0  -4    0.31    1.76
   5   0  -3   49.71    6.14
   5   0  -3   50.11    4.15
   5   0  -3   50.25    4.71
   5   0  -2   -0.19    1.12
   5   0  -2   -0.54    2.23
  -5   0   2   -0.53    1.91
   5   0  -2   -0.24    1.51
   5   0  -2    1.22    1.86
   5   0  -1  262.93   14.60
   5   0  -1  241.82   13.79
   5   0  -1  247.95   10.35
   5   0  -1  252.51    9.61
  -5   0   1  226.27   13.27
   5   0  -1  260.18   11.31
   5   0   0    0.38    1.12
   5   0   0   -0.58    1.57
  -5   0   0   -0.53    1.80
   5   0   0    0.24    1.54
   5   0   0    0.59    1.71
  -5   0  -1  305.73   15.86
   5   0   1  327.81   11.56
   5   0   1  311.21   12.99
   5   0   2   -0.59    1.72
   5   0   2    0.78    1.28
   5   0   3    6.17    1.68
   5   0   4   -0.61    1.37
   5   0   5   94.77    5.32
   5   0   6   -0.41    1.18
   5   0   7  495.01   15.99
   5   0   8    0.19    1.09
   5   0   9    4.10    1.35
   5   0  10   -0.29    1.02
   5   0  11   17.54    1.79
   5   0  12   -0.24    0.62
   5   1 -12   43.04    2.50
   5  -1 -12   54.74    2.73
   5  -1 -11    8.28    1.50
   5   1 -11    4.03    1.18
   5  -1 -11    5.66    1.23
   5   1 -10   41.98    3.13
   5  -1 -10   48.35    3.26
   5  -1 -10   53.47    3.63
   5   1  -9   45.98    3.41
   5  -1  -9   43.93    3.34
   5  -1  -9   43.27    3.58
   5  -1  -8   20.96    2.72
   5  -1  -7    2.68    1.61
   5  -1  -6   12.30    2.39
  -5   1   5   75.14    4.94
   5   1  -4   58.50    4.52
  -5   1   4   57.56    4.32
   5   1  -4   61.56    5.12
   5   1  -3   15.59    2.62
  -5   1   3   14.63    2.28
   5   1  -3   13.78    2.74
   5  -1  -2    7.91    2.74
   5  -1  -2    8.40    2.15
   5   1  -2    5.41    1.85
   5   1  -2    7.97    2.31
   5   1  -2    5.40    1.56
   5  -1  -2    2.69    1.37
   5  -1  -1    3.42    1.39
   5   1  -1    1.91    1.22
   5   1  -1    5.79    2.67
   5  -1  -1    2.30    1.97
   5  -1  -1    3.31    2.41
   5  -1  -1    2.92    1.47
   5   1  -1    5.34    1.81
  -5  -1   1    4.22    2.31
  -5   1   1    1.58    1.88
   5  -1  -1    4.55    2.06
   5   1  -1    2.75    1.84
   5  -1   0    8.54    1.74
   5   1   0    6.29    1.59
   5   1   0    2.88    2.46
   5  -1   0    8.02    2.84
   5  -1   0    3.27    2.11
  -5  -1   0    3.67    2.03
   5  -1   0    6.41    1.84
   5   1   0    6.94    1.95
  -5   1   0    6.29    2.54
   5  -1   0    8.62    2.20
   5   1   0    7.88    2.47
   5  -1   1    2.67    1.34
   5   1   1    4.63    2.54
   5  -1   1    8.62    2.79
   5   1   1    4.41    1.47
  -5  -1  -1    5.32    2.40
   5   1   1    5.63    1.83
  -5   1  -1    1.60    1.82
   5   1   1    8.98    2.46
   5   1   2    7.65    2.98
   5  -1   2    6.43    2.77
   5  -1   2    7.91    1.64
   5   1   2    9.90    1.77
   5   1   2    8.24    2.30
   5   1   3    6.08    1.72
   5  -1   3    7.45    1.65
   5   1   3   10.25    1.88
   5   1   4    9.20    1.96
   5  -1   4    9.35    1.91
   5   1   4    6.41    1.70
   5   1   5   22.80    2.74
   5  -1   5   23.25    2.69
   5   1   5   24.41    2.73
   5   1   6   54.21    4.02
   5  -1   6   56.21    3.97
   5   1   6   53.79    3.89
   5   1   7   22.40    2.63
   5  -1   7   20.90    2.51
   5   1   7   20.66    2.44
   5   1   8   34.78    3.10
   5  -1   8   37.19    3.12
   5   1   8   41.85    3.26
   5  -1   9   50.05    3.45
   5   1   9   52.56    3.55
   5  -1  10    6.71    1.33
   5   1  10    7.87    1.47
   5  -1  11    0.21    0.74
   5   1  11    1.82    0.88
   5  -1  12    1.34    0.64
   5   1  12    1.78    0.65
   5  -2 -12    1.00    0.75
   5  -2 -11  108.68    4.84
   5  -2 -10   77.72    4.37
   5  -2  -9  104.69    5.53
   5  -2  -8    4.09    1.65
   5  -2  -7   15.66    2.45
   5  -2  -6   48.84    4.06
  -5   2   6   50.85    3.98
   5  -2  -5   64.59    4.64
  -5   2   5   67.34    4.63
   5   2  -4  444.33   15.67
  -5   2   4  457.16   15.44
   5  -2  -3   81.54    5.09
   5   2  -3   78.77    5.28
  -5   2   3   73.20    4.98
   5   2  -3   71.83    5.75
   5  -2  -2   11.62    2.17
   5   2  -2   13.46    2.46
  -5   2   2    7.29    1.91
   5   2  -2   12.51    2.90
   5  -2  -1   97.27    5.72
   5   2  -1   99.69    6.10
  -5   2   1   99.95    5.74
   5  -2   0   28.47    3.10
   5   2   0   25.05    3.07
  -5   2   0   26.85    2.98
   5  -2   1  721.68   22.14
   5   2   1  723.04   22.42
   5  -2   2  380.50   13.51
   5   2   3  245.72    9.98
   5   2   4   74.99    5.02
   5   2   5  161.79    7.64
   5   2   6   -0.66    1.34
   5   2   7   21.88    2.66
   5   2   8   10.89    1.94
   5   2   9  119.02    5.67
   5   2  10    2.86    1.09
   5   2  11   14.54    1.55
   5  -3 -11    1.85    0.93
   5  -3 -10   -0.52    1.12
   5  -3  -9    3.00    1.36
  -5   3   9    2.73    1.23
   5  -3  -8    7.00    1.74
   5  -3  -7    4.10    1.63
  -5   3   7    4.94    1.57
   5  -3  -6  155.89    7.27
  -5   3   6  157.98    7.40
  -5   3   5    2.68    1.40
   5   3  -4   18.06    2.70
  -5   3   4   22.56    2.75
   5  -3  -3  149.57    7.31
   5   3  -3  150.96    7.54
  -5   3   3  137.99    7.10
   5  -3  -2   25.65    2.97
   5   3  -2   28.95    3.35
  -5   3   2   35.64    3.35
   5  -3  -1   13.53    2.29
   5   3  -1   14.67    2.67
  -5   3   1   11.48    2.18
   5  -3   0   90.09    5.55
   5   3   0   95.45    5.89
   5  -3   1  338.40   12.54
   5   3   1  331.36   12.64
   5  -3   2   24.40    2.92
   5   3   2   26.58    3.15
   5  -3   3    1.37    1.55
   5   3   4   47.02    3.82
   5   3   5   76.63    4.90
   5   3   6    2.68    1.48
   5   3   7   30.31    2.91
   5   3   8   31.40    2.79
   5   3   9   69.00    3.89
   5   3  10    2.52    1.00
  -5   3 -11    7.54    1.07
  -5   4  10    1.76    0.83
  -5   4   9    0.12    0.93
  -5   4   8    4.93    1.42
  -5   4   7   18.05    2.22
  -5   4   6   21.19    2.46
  -5   4   5   15.88    2.29
  -5   4   4   73.64    4.78
   5   4  -3    1.39    1.55
  -5   4   3    6.10    1.70
   5  -4  -2   -0.22    1.14
   5   4  -2   -0.72    1.38
  -5   4   2   -0.22    1.19
   5  -4  -1    0.44    1.32
   5   4  -1    1.23    1.52
  -5   4   1    1.27    1.31
   5  -4   0   43.83    3.77
   5   4   0   47.69    4.12
   5  -4   1   13.18    2.13
   5   4   1   14.30    2.46
  -5   4  -2    0.64    1.23
   5  -4   2    1.95    1.43
   5   4   2   -0.23    1.45
  -5   4  -3   43.11    3.65
   5  -4   3   47.45    3.79
   5   4   3   47.43    3.85
  -5   4  -4   22.39    2.74
   5  -4   4   19.66    2.50
  -5   4  -5    9.15    1.84
   5  -4   5   12.38    2.01
  -5   4  -6   22.43    2.52
   5   4   6   18.94    2.24
   5  -4   6   17.21    2.21
  -5   4  -7    8.98    1.71
   5   4   7   10.59    1.71
   5  -4   7    7.92    1.53
  -5   4  -8    2.41    1.10
   5   4   8    0.66    0.94
  -5   4  -9    2.70    0.98
  -5   4 -10   16.88    1.50
  -5   5   8   29.67    2.10
  -5   5   8   29.54    2.17
  -5   5   7    9.51    1.48
  -5   5   7    9.95    1.58
  -5   5   6    0.87    1.02
  -5   5   6    1.55    1.09
  -5   5   5   -0.16    1.03
  -5   5   5    0.15    1.16
  -5   5   4   11.99    1.94
   5   5  -3    4.98    1.64
  -5   5   3    8.98    1.74
   5   5  -2   16.43    2.43
  -5   5   2   10.81    1.89
   5   5  -1    0.64    1.34
   5  -5   0   32.82    2.97
   5   5   0   33.62    3.32
  -5   5   0   31.26    3.09
  -5   5  -1    0.39    1.22
   5  -5   1    0.36    1.04
   5   5   1    3.18    1.60
  -5   5  -2   10.48    1.97
   5   5   2   11.60    2.13
  -5   5  -3    6.46    1.69
   5   5   3    8.12    1.78
  -5   5  -4  130.80    6.15
  -5   5  -5    5.62    1.51
  -5   5  -6    0.71    0.99
  -5   5  -7   42.29    2.79
  -5   5  -8   21.55    1.80
  -5   6   5    0.10    0.78
  -5   6   4    0.56    0.79
  -5   6   3    7.06    1.32
   5   6  -2   12.03    1.78
  -5   6   1   12.73    1.85
   5   6  -1   12.27    1.82
  -5   6   0    5.98    1.42
   5   6   0    5.51    1.45
   5   6   1   47.44    3.36
  -5   6  -1   48.54    3.31
  -5   6  -2   15.05    1.95
   5   6   2   20.06    2.16
  -5   6  -3    2.41    1.12
   5   6   3    3.02    1.19
  -5   6  -4    3.03    1.03
  -5   6  -5   11.24    1.43
  -5   6  -6   22.18    1.74
   6   0 -10    5.32    1.02
   6   0  -9   -0.11    0.95
   6   0  -8    3.58    1.32
   6   0  -8    2.83    1.25
   6   0  -7    0.17    1.20
   6   0  -6  342.94   11.99
   6   0  -5    0.61    1.40
  -6   0   4  109.55    5.85
  -6   0   3    0.66    1.21
   6   0  -2  110.62    6.40
   6   0  -2   98.58    6.72
   6   0  -1    0.75    1.68
   6   0  -1   -1.88    2.17
   6   0  -1    0.80    1.33
   6   0   0  791.90   24.45
   6   0   0  804.93   23.64
   6   0   0  807.69   25.67
   6   0   1    0.20    1.24
   6   0   1   -0.30    1.72
   6   0   2 1031.56   29.23
   6   0   3   -0.78    1.25
   6   0   4   36.01    3.17
   6   0   5    0.90    1.10
   6   0   6    0.83    1.07
   6   0   7    0.15    0.88
   6   0   8   67.49    3.64
   6   0   9   -0.51    0.72
   6   0  10    2.10    0.70
   6  -1 -10    1.63    0.85
   6   1 -10    1.10    0.76
   6  -1 -10    1.63    0.76
   6   1  -9   22.59    1.97
   6  -1  -9   27.92    2.12
   6  -1  -9   27.43    2.29
   6  -1  -8    4.43    1.43
   6   1  -8    4.04    1.31
   6  -1  -8    3.92    1.26
   6  -1  -7   24.83    2.60
   6  -1  -6  139.70    6.59
   6  -1  -5   56.12    4.09
  -6   1   5   46.90    3.72
   6   1  -4   62.46    4.63
  -6   1   4   67.61    4.49
   6   1  -4   63.49    5.15
   6   1  -3   41.14    3.78
  -6   1   3   48.41    3.87
   6   1  -3   40.55    4.24
   6   1  -2   15.93    2.65
  -6   1   2   13.46    2.23
   6   1  -2   18.23    3.02
   6   1  -1   49.15    4.22
   6  -1  -1   49.77    3.75
   6   1  -1   50.50    3.79
  -6   1   1   48.66    3.96
   6   1  -1   49.90    4.67
   6   1   0  203.96    9.13
  -6   1   0  196.42    8.68
   6  -1   0  201.94    8.42
   6   1   0  207.85    8.45
   6   1   0  211.15   10.06
   6   1   1   45.86    3.95
  -6   1  -1   42.22    3.62
   6  -1   1   44.11    3.53
   6   1   1   46.18    3.60
   6   1   1   48.83    4.58
   6  -1   2    8.23    1.70
   6   1   2    8.29    1.65
   6   1   2    5.19    1.98
   6  -1   3   37.28    3.21
   6   1   3   37.76    3.20
   6  -1   4   39.73    3.25
   6  -1   4   30.02    2.84
   6   1   4   35.92    3.04
   6  -1   5    5.13    1.48
   6   1   5    5.52    1.54
   6  -1   6   12.14    1.82
   6   1   6    8.43    1.64
   6  -1   7   61.20    3.61
   6   1   7   69.52    3.79
   6  -1   8    2.84    1.05
   6   1   8    0.95    0.89
   6  -1   9    4.91    1.01
   6   1   9    7.49    1.13
   6  -2  -9    8.83    1.36
   6  -2  -8    2.55    1.22
   6  -2  -7   30.89    2.76
   6  -2  -6    1.75    1.34
  -6   2   6    0.84    1.03
   6  -2  -5    6.00    1.73
  -6   2   5    6.43    1.62
   6  -2  -4   14.31    2.15
   6   2  -4   10.67    2.19
  -6   2   4   14.64    2.15
   6   2  -4   11.60    2.45
   6   2  -3   17.37    2.63
  -6   2   3   17.15    2.42
   6   2  -3   19.86    3.00
   6  -2  -2   28.86    2.90
   6   2  -2   31.83    3.31
  -6   2   2   32.64    3.16
   6   2  -2   27.53    3.53
   6  -2  -1   23.02    2.62
   6   2  -1   19.34    2.74
  -6   2   1   19.86    2.61
   6   2  -1   25.37    3.50
   6  -2   0  132.04    6.54
   6   2   0  121.11    6.71
  -6   2   0  127.70    6.47
   6   2   0  144.23    7.83
   6  -2   1   -0.21    1.30
   6   2   1    1.39    1.48
   6   2   1    1.18    1.73
   6  -2   2    2.88    1.41
   6   2   2    3.40    1.87
   6  -2   3    1.21    1.28
   6  -2   4   -0.39    1.08
   6  -2   5   69.14    4.31
   6  -2   6   83.74    4.64
   6  -2   7   45.84    3.19
   6  -2   8   -0.73    0.82
  -6   2  -9    0.26    0.66
   6  -2   9    0.75    0.72
   6  -3  -8   16.57    1.68
  -6   3   8   16.37    1.67
   6  -3  -7   10.57    1.57
  -6   3   7   11.05    1.51
   6  -3  -6    0.99    1.08
  -6   3   6    0.15    0.92
  -6   3   5   14.23    1.97
   6   3  -4    1.91    1.41
  -6   3   4    2.91    1.32
   6   3  -3   17.86    2.41
  -6   3   3   18.11    2.40
   6   3  -3   15.56    2.66
   6  -3  -2   -0.19    1.17
   6   3  -2   -0.65    1.31
  -6   3   2   -0.58    1.18
   6   3  -2    0.27    1.54
   6  -3  -1   22.71    2.53
   6   3  -1   20.47    2.68
  -6   3   1   23.00    2.58
   6   3  -1   23.27    3.35
   6  -3   0    5.53    1.58
   6   3   0    4.86    1.71
   6   3   0    4.75    2.02
   6  -3   1    0.79    1.27
   6   3   1    3.43    1.64
   6   3   1    0.82    1.55
   6  -3   2   12.73    1.96
   6   3   2   12.52    2.15
   6   3   2   12.36    2.55
   6  -3   3   38.87    3.21
   6   3   3   35.61    3.67
   6  -3   4   96.28    5.08
   6  -3   5    0.16    0.94
   6  -3   6   14.35    1.88
  -6   3  -7    0.80    0.89
   6  -3   7    1.09    0.81
  -6   3  -8    0.37    0.67
   6  -3   8    0.47    0.70
  -6   4   7    1.88    0.74
  -6   4   7    1.75    0.89
  -6   4   6    4.68    1.13
  -6   4   6    3.94    1.16
  -6   4   5   18.03    1.96
  -6   4   4   76.04    4.19
   6   4  -3    9.89    1.70
  -6   4   3    5.53    1.41
   6   4  -2   13.54    2.11
  -6   4   2   13.56    1.87
   6   4  -2   13.95    2.37
   6   4  -1    1.87    1.35
   6   4  -1    2.77    1.56
   6  -4   0   28.31    2.61
   6   4   0   28.04    2.87
   6   4   0   26.79    3.10
   6  -4   1    3.14    1.21
   6   4   1    1.99    1.34
   6   4   1    4.87    1.78
   6  -4   2    0.64    1.00
   6   4   2    1.36    1.26
   6   4   2   -0.44    1.39
   6  -4   3   -0.15    0.94
   6   4   3    1.62    1.40
   6  -4   4   61.06    3.57
  -6   4  -5    2.61    1.02
   6  -4   5    2.67    1.05
  -6   4  -6   14.12    1.54
   6  -4   6   14.99    1.55
  -6   4  -7   53.39    2.68
   6  -4   7   51.10    2.59
  -6   5   5    0.48    0.59
  -6   5   4    7.18    1.09
   6   5  -3    1.43    0.91
  -6   5   3    3.10    0.94
   6   5  -2    4.14    1.13
   6   5  -1    2.54    1.10
   6   5  -1   -0.64    1.28
   6   5   0   17.17    1.96
   6   5   0   15.22    2.12
   6   5   1   19.20    2.03
   6   5   1   22.59    2.48
   6   5   2   37.51    2.60
   6   5   2   34.37    2.89
   6  -5   3    3.77    0.95
   6   5   3    3.21    1.25
  -6   5  -4    5.80    1.07
   7   0  -7    5.79    1.00
   7   0  -6   -0.10    0.83
   7   0  -5    7.36    1.40
   7   0  -4   -0.80    1.13
  -7   0   4    0.80    0.99
  -7   0   3    0.59    1.00
  -7   0   2   -0.31    0.97
  -7   0   1   28.28    2.56
  -7   0   0   -0.16    0.98
  -7   0  -1    9.36    1.61
  -7   0  -2   -0.14    0.93
   7   0   2   -0.40    0.95
   7   0   3   16.40    1.77
   7   0   4   -0.35    0.85
   7   0   5    2.22    0.85
   7   0   6   -0.50    0.67
   7  -1  -6    2.58    0.97
   7   1  -6    1.87    0.82
   7  -1  -6    1.15    0.81
   7  -1  -5    6.45    1.34
  -7   1   5    3.23    0.99
   7  -1  -4  109.02    4.86
   7   1  -4  104.19    4.65
  -7   1   4   98.72    4.67
   7  -1  -3    6.77    1.55
  -7   1   3    6.89    1.41
  -7  -1   3    5.00    1.26
  -7   1   2   44.35    3.14
  -7  -1   2   45.50    3.16
  -7   1   1   49.11    3.35
  -7  -1   1   54.80    3.52
  -7   1   0   92.46    4.67
  -7   1  -1   13.69    1.77
   7  -1   2   90.43    4.30
   7   1   2   90.39    4.32
   7  -1   3    1.05    0.96
   7   1   3   -0.12    0.82
   7  -1   4   44.56    2.68
   7   1   4   43.72    2.68
   7  -1   5    0.92    0.72
   7   1   5    0.37    0.72
   7  -1   6    2.75    0.77
   7   1   6    3.54    0.78
   7  -2  -6   49.02    2.62
   7  -2  -5    9.86    1.40
  -7   2   5    7.84    1.16
   7  -2  -4    6.83    1.31
  -7   2   4    7.16    1.30
   7  -2  -3   17.79    1.90
  -7   2   3   17.91    1.93
  -7  -2   3   17.50    1.82
   7  -2  -2    2.34    1.26
   7   2  -2    4.63    1.39
  -7   2   2    5.06    1.24
  -7  -2   2    6.19    1.29
   7   2  -1   97.71    4.88
  -7   2   1   95.83    4.59
   7   2   0  151.96    6.33
  -7   2   0  145.67    5.95
   7   2   0  154.95    7.01
   7   2   1  137.70    5.83
   7   2   1  133.41    6.40
   7   2   2   64.71    4.04
   7  -2   3   11.23    1.46
   7  -2   4    3.15    0.88
   7  -2   5   27.22    1.90
  -7   3   4   -0.09    0.66
  -7   3   3    0.88    0.77
   7   3  -2    0.12    0.89
  -7   3   2    0.41    0.69
   7   3  -1   12.39    1.63
  -7   3   1   13.28    1.46
   7   3  -1   10.73    1.79
   7   3   0    1.10    0.98
   7   3   0    0.77    1.12
   7   3   1    5.14    1.19
   7   3   1    2.53    1.20
   7  -3   2    6.02    1.05
   7   3   2    6.29    1.45
   7  -3   3   -0.09    0.63
   7  -3   4    7.84    1.06
   0   0   0    0.00    0.00


TITL UrAc_130K in P2(1)/n
REM P2(1)/n (#14 in standard setting)
CELL 1.54184   6.235235   7.275607  13.132846  90.0000  90.7096  90.0000
ZERR    3.00   0.000470   0.000647   0.001138   0.0000   0.0081   0.0000
LATT  1
SYMM -x+1/2, y+1/2,-z+1/2
SFAC C H N O
UNIT 15.00 12.00 12.00 9.00
TREF
HKLF 4
END
_computing_structure_solution     'SHELXT 2018/2 (Sheldrick, 2018)'
;
_shelx_hkl_checksum                88923
_olex2_submission_special_instructions  'No special instructions were received'
_oxdiff_exptl_absorpt_empirical_details
;
Empirical correction (ABSPACK) includes:
- Absorption correction using spherical harmonics
- Frame scaling
;
_oxdiff_exptl_absorpt_empirical_full_max  1.391
_oxdiff_exptl_absorpt_empirical_full_min  0.789
loop_
  _twin_individual_id
  _twin_individual_mass_fraction_refined
 1 0.9802(15)
 2 0.0198(15)
