# Supplementary material
Source: MDPI journal article supplement (https://www.mdpi.com/2075-163X/9/6/373)
Supplement: s1 [file s1 › UA_0_last.cif]

data_UA_0_urac_273k
_audit_creation_date               2019-04-29
_audit_creation_method
;
Olex2 1.2
(compiled 2018.05.29 svn.r3508 for OlexSys, GUI svn.r5506)
;
_shelx_SHELXL_version_number       '2018/3'
_audit_contact_author_address      ?
_audit_contact_author_email        ?
_audit_contact_author_name         ''
_audit_contact_author_phone        ?
_publ_contact_author_id_orcid      ?
_publ_section_references
;
Dolomanov, O.V., Bourhis, L.J., Gildea, R.J, Howard, J.A.K. & Puschmann, H.
 (2009), J. Appl. Cryst. 42, 339-341.

Sheldrick, G.M. (2015). Acta Cryst. C71, 3-8.
;
_chemical_name_common              ?
_chemical_name_systematic          ?
_chemical_formula_moiety           'C5 H4 N4 O3'
_chemical_formula_sum              'C5 H4 N4 O3'
_chemical_formula_weight           168.12
_chemical_melting_point            ?
_chemical_oxdiff_formula           'C5 H4 N4 O3'
loop_
  _atom_type_symbol
  _atom_type_description
  _atom_type_scat_dispersion_real
  _atom_type_scat_dispersion_imag
  _atom_type_scat_source
 'C' 'C' 0.0181 0.0091 'International Tables Vol C Tables 4.2.6.8 and 6.1.1.4'
 'H' 'H' 0.0000 0.0000 'International Tables Vol C Tables 4.2.6.8 and 6.1.1.4'
 'N' 'N' 0.0311 0.0180 'International Tables Vol C Tables 4.2.6.8 and 6.1.1.4'
 'O' 'O' 0.0492 0.0322 'International Tables Vol C Tables 4.2.6.8 and 6.1.1.4'

_shelx_space_group_comment
;
The symmetry employed for this shelxl refinement is uniquely defined
by the following loop, which should always be used as a source of
symmetry information in preference to the above space-group names.
They are only intended as comments.
;
_space_group_crystal_system        'monoclinic'
_space_group_IT_number             14
_space_group_name_H-M_alt          'P 1 21/n 1'
_space_group_name_Hall             '-P 2yn'
loop_
  _space_group_symop_operation_xyz
 'x, y, z'
 '-x+1/2, y+1/2, -z+1/2'
 '-x, -y, -z'
 'x-1/2, -y-1/2, z-1/2'

_cell_length_a                     6.2025(4)
_cell_length_b                     7.4163(5)
_cell_length_c                     13.1147(8)
_cell_angle_alpha                  90
_cell_angle_beta                   90.378(6)
_cell_angle_gamma                  90
_cell_volume                       603.26(7)
_cell_formula_units_Z              4
_cell_measurement_reflns_used      1251
_cell_measurement_temperature      273(2)
_cell_measurement_theta_max        71.7540
_cell_measurement_theta_min        6.7310
_shelx_estimated_absorpt_T_max     ?
_shelx_estimated_absorpt_T_min     ?
_exptl_absorpt_coefficient_mu      1.363
_exptl_absorpt_correction_T_max    1.00000
_exptl_absorpt_correction_T_min    0.97043
_exptl_absorpt_correction_type     multi-scan
_exptl_absorpt_process_details
;
CrysAlisPro 1.171.39.44a (Rigaku Oxford Diffraction, 2018)
Empirical absorption correction using spherical harmonics,
 implemented in SCALE3 ABSPACK scaling algorithm.
;
_exptl_absorpt_special_details     ?
_exptl_crystal_colour              'translucent light-yellow'
_exptl_crystal_density_diffrn      1.851
_exptl_crystal_density_meas        ?
_exptl_crystal_density_method      ?
_exptl_crystal_description         'prism'
_exptl_crystal_F_000               344
_exptl_crystal_size_max            0.075
_exptl_crystal_size_mid            0.07
_exptl_crystal_size_min            0.027
_exptl_transmission_factor_max     ?
_exptl_transmission_factor_min     ?
_diffrn_reflns_av_R_equivalents    0.0200
_diffrn_reflns_av_unetI/netI       0.0281
_diffrn_reflns_Laue_measured_fraction_full  0.984
_diffrn_reflns_Laue_measured_fraction_max  0.983
_diffrn_reflns_limit_h_max         7
_diffrn_reflns_limit_h_min         -7
_diffrn_reflns_limit_k_max         8
_diffrn_reflns_limit_k_min         -6
_diffrn_reflns_limit_l_max         15
_diffrn_reflns_limit_l_min         -15
_diffrn_reflns_number              2577
_diffrn_reflns_point_group_measured_fraction_full  0.984
_diffrn_reflns_point_group_measured_fraction_max  0.983
_diffrn_reflns_theta_full          67.684
_diffrn_reflns_theta_max           69.854
_diffrn_reflns_theta_min           3.370
_diffrn_ambient_environment        air
_diffrn_ambient_temperature        273(2)
_diffrn_detector                   'CCD plate'
_diffrn_detector_area_resol_mean   ?
_diffrn_detector_type              HyPix3000
_diffrn_measured_fraction_theta_full  0.984
_diffrn_measured_fraction_theta_max  0.983
_diffrn_measurement_details
;
List of Runs (angles in degrees, time in seconds):

  # Type    Start    End  Width  t~exp~   \w     \q     \k     \f   Frames
--------------------------------------------------------------------------
  1  \w   -100.00 -73.00   0.50    1.00    --  -38.95 -55.00 -24.00   54
  2  \w    -54.00 -16.00   0.50    1.00    --  -38.95  55.00 119.00   76
  3  \w    -65.00 -30.00   0.50    1.00    --  -38.95 -55.00 -24.00   70
  4  \w     24.00  54.00   0.50    1.00    --   38.95  55.00 119.00   60
  5  \w     89.00 153.00   0.50    2.50    --  107.00  55.00 119.00  128
  6  \w     45.00 127.00   0.50    2.50    --  107.00 -55.00 -24.00  164
  7  \w    -62.00   4.00   0.50    1.00    --  -38.95  77.00-150.00  132
  8  \w    -52.00 -14.00   0.50    1.00    --  -38.95  43.00 150.00   76
  9  \w   -102.00 -42.00   0.50    1.00    --  -38.95 -65.00 -60.00  120
 10  \w    -10.00  21.00   0.50    1.00    --  -38.95  43.00 150.00   62
 11  \w     68.00 106.00   0.50    1.00    --   38.95  21.00  90.00   76
 12  \w    -18.00  11.00   0.50    1.00    --   38.95 -32.00 -30.00   58
 13  \w     29.00  63.00   0.50    1.00    --   38.95  21.00  90.00   68
 14  \w    -26.00   0.00   0.50    1.00    --   38.95 -55.00 -24.00   52
 15  \w     16.00  48.00   0.50    1.00    --   38.95 -32.00 -30.00   64
 16  \w    -21.00  21.00   0.50    1.00    --   38.95 -32.00 150.00   84
 17  \w     34.00  63.00   0.50    1.00    --   38.95  43.00 -90.00   58
 18  \w     89.00 155.00   0.50    2.50    --  107.00  45.00   0.00  132
 19  \w     78.00 129.00   0.50    2.50    --  107.00 -61.00-150.00  102
 20  \w     68.00 114.00   0.50    2.50    --  107.00-133.00-150.00   92
 21  \w     41.00 120.00   0.50    2.50    --  107.00 -30.00 -60.00  158
 22  \w     93.00 127.00   0.50    2.50    --  107.00  30.00-180.00   68
 23  \w     99.00 153.00   0.50    2.50    --  107.00  45.00  90.00  108
 24  \w     55.00 122.00   0.50    2.50    --  107.00 -37.00  90.00  134
 25  \w     97.00 122.00   0.50    2.50    --  107.00 -53.00-150.00   50
 26  \w     99.00 125.00   0.50    2.50    --  107.00-133.00 -60.00   52
 27  \w     59.00  84.00   0.50    2.50    --  107.00 -53.00-150.00   50
 28  \w    120.00 155.00   0.50    2.50    --  107.00  30.00  30.00   70
 29  \w     44.00  92.00   0.50    2.50    --  107.00-133.00 -60.00   96
 30  \w    107.00 142.00   0.50    2.50    --  107.00  15.00  90.00   70
 31  \w     72.00 115.00   0.50    2.50    --  107.00 -37.00 150.00   86
;
_diffrn_measurement_device         'four-circle diffractometer'
_diffrn_measurement_device_type   
 'SuperNova, Single source at offset/far, HyPix3000'
_diffrn_measurement_method         '\w scans'
_diffrn_orient_matrix_type        
 'CrysAlisPro convention (1999,Acta A55,543-557)'
_diffrn_orient_matrix_UB_11        -0.2113870000
_diffrn_orient_matrix_UB_12        -0.1028191000
_diffrn_orient_matrix_UB_13        0.0197910000
_diffrn_orient_matrix_UB_21        0.1037082000
_diffrn_orient_matrix_UB_22        -0.0906711000
_diffrn_orient_matrix_UB_23        0.0939185000
_diffrn_orient_matrix_UB_31        -0.0791140000
_diffrn_orient_matrix_UB_32        0.1561287000
_diffrn_orient_matrix_UB_33        0.0676753000
_diffrn_radiation_monochromator    mirror
_diffrn_radiation_probe            x-ray
_diffrn_radiation_type             CuK\a
_diffrn_radiation_wavelength       1.54184
_diffrn_source                     'micro-focus sealed X-ray tube'
_diffrn_source_type                'SuperNova (Cu) X-ray Source'
_reflns_Friedel_coverage           0.000
_reflns_Friedel_fraction_full      .
_reflns_Friedel_fraction_max       .
_reflns_number_gt                  999
_reflns_number_total               1120
_reflns_odcompleteness_completeness  97.76
_reflns_odcompleteness_iscentric   1
_reflns_odcompleteness_theta       72.42
_reflns_special_details
;
 Reflections were merged by SHELXL according to the crystal
 class for the calculation of statistics and refinement.
 
 _reflns_Friedel_fraction is defined as the number of unique
 Friedel pairs measured divided by the number that would be
 possible theoretically, ignoring centric projections and
 systematic absences. Completness statistics refer to single and
 composite reflections containing twin component 1 only.
;
_reflns_threshold_expression       'I > 2\s(I)'
_computing_cell_refinement         'CrysAlisPro 1.171.39.44a (Rigaku OD, 2018)'
_computing_data_collection         'CrysAlisPro 1.171.39.44a (Rigaku OD, 2018)'
_computing_data_reduction          'CrysAlisPro 1.171.39.44a (Rigaku OD, 2018)'
_computing_molecular_graphics      'Olex2 (Dolomanov et al., 2009)'
_computing_publication_material    'Olex2 (Dolomanov et al., 2009)'
_computing_structure_refinement    'ShelXL (Sheldrick, 2015)'
_computing_structure_solution      'ShelXT (Sheldrick, 2015)'
_refine_diff_density_max           0.290
_refine_diff_density_min           -0.199
_refine_diff_density_rms           0.050
_refine_ls_extinction_coef         0.0032(4)
_refine_ls_extinction_expression  
 'Fc^*^=kFc[1+0.001xFc^2^\l^3^/sin(2\q)]^-1/4^'
_refine_ls_extinction_method       'SHELXL-2018/3 (Sheldrick 2018)'
_refine_ls_goodness_of_fit_ref     1.093
_refine_ls_hydrogen_treatment      constr
_refine_ls_matrix_type             full
_refine_ls_number_parameters       111
_refine_ls_number_reflns           1120
_refine_ls_number_restraints       0
_refine_ls_R_factor_all            0.0516
_refine_ls_R_factor_gt             0.0462
_refine_ls_restrained_S_all        1.093
_refine_ls_shift/su_max            0.000
_refine_ls_shift/su_mean           0.000
_refine_ls_structure_factor_coef   Fsqd
_refine_ls_weighting_details      
 'w=1/[\s^2^(Fo^2^)+(0.0805P)^2^+0.2267P] where P=(Fo^2^+2Fc^2^)/3'
_refine_ls_weighting_scheme        calc
_refine_ls_wR_factor_gt            0.1340
_refine_ls_wR_factor_ref           0.1409
_refine_special_details
;
 Refined as a 2-component twin.
;
_olex2_refinement_description
;
1. Twinned data refinement
 Scales: 0.917(2)
 0.083(2)
2. Fixed Uiso
 At 1.2 times of:
  All N(H) groups
3.a Aromatic/amide H refined with riding coordinates:
 N1(H1), N2(H2), N3(H3), N4(H4)
;
_atom_sites_solution_hydrogens     geom
_atom_sites_solution_primary       ?
_atom_sites_solution_secondary     ?
loop_
  _atom_site_label
  _atom_site_type_symbol
  _atom_site_fract_x
  _atom_site_fract_y
  _atom_site_fract_z
  _atom_site_U_iso_or_equiv
  _atom_site_adp_type
  _atom_site_occupancy
  _atom_site_site_symmetry_order
  _atom_site_calc_flag
  _atom_site_refinement_flags_posn
  _atom_site_refinement_flags_adp
  _atom_site_refinement_flags_occupancy
  _atom_site_disorder_assembly
  _atom_site_disorder_group
 O1 O 0.9240(3) 0.4834(3) 0.36794(15) 0.0472(6) Uani 1 1 d . . . . .
 O2 O 0.5829(3) 0.7696(3) 0.62976(14) 0.0435(5) Uani 1 1 d . . . . .
 O3 O -0.0292(3) 0.9664(3) 0.35937(14) 0.0409(5) Uani 1 1 d . . . . .
 N1 N 0.7529(4) 0.6354(3) 0.49495(16) 0.0363(5) Uani 1 1 d . . . . .
 H1 H 0.857088 0.606569 0.535355 0.044 Uiso 1 1 calc R . . . .
 N2 N 0.6140(4) 0.6327(3) 0.32922(17) 0.0373(6) Uani 1 1 d . . . . .
 H2 H 0.618937 0.603361 0.265833 0.045 Uiso 1 1 calc R . . . .
 N3 N 0.2365(4) 0.8768(3) 0.47454(17) 0.0351(5) Uani 1 1 d . . . . .
 H3 H 0.185697 0.920198 0.530253 0.042 Uiso 1 1 calc R . . . .
 N4 N 0.2740(3) 0.7986(3) 0.31381(16) 0.0340(6) Uani 1 1 d . . . . .
 H4 H 0.249575 0.785158 0.249637 0.041 Uiso 1 1 calc R . . . .
 C1 C 0.7728(4) 0.5784(4) 0.3959(2) 0.0376(6) Uani 1 1 d . . . . .
 C2 C 0.4487(4) 0.7340(3) 0.3658(2) 0.0327(6) Uani 1 1 d . . . . .
 C3 C 0.4270(4) 0.7830(4) 0.4649(2) 0.0342(6) Uani 1 1 d . . . . .
 C4 C 0.5862(4) 0.7337(4) 0.5385(2) 0.0343(6) Uani 1 1 d . . . . .
 C5 C 0.1431(4) 0.8889(4) 0.38116(19) 0.0348(6) Uani 1 1 d . . . . .

loop_
  _atom_site_aniso_label
  _atom_site_aniso_U_11
  _atom_site_aniso_U_22
  _atom_site_aniso_U_33
  _atom_site_aniso_U_23
  _atom_site_aniso_U_13
  _atom_site_aniso_U_12
 O1 0.0438(11) 0.0596(13) 0.0381(11) -0.0014(9) -0.0070(9) 0.0131(10)
 O2 0.0508(11) 0.0548(12) 0.0248(10) 0.0011(8) -0.0076(8) 0.0013(9)
 O3 0.0404(10) 0.0520(12) 0.0301(10) 0.0013(8) -0.0065(8) 0.0073(9)
 N1 0.0355(11) 0.0417(12) 0.0315(11) 0.0022(9) -0.0093(9) 0.0027(9)
 N2 0.0386(12) 0.0454(13) 0.0278(11) -0.0025(9) -0.0069(9) 0.0030(10)
 N3 0.0373(11) 0.0415(12) 0.0266(10) -0.0022(9) -0.0033(9) 0.0031(10)
 N4 0.0365(11) 0.0415(12) 0.0239(10) -0.0019(9) -0.0057(8) 0.0022(9)
 C1 0.0379(14) 0.0401(14) 0.0348(13) 0.0033(11) -0.0064(11) -0.0012(11)
 C2 0.0351(12) 0.0351(13) 0.0278(13) 0.0012(10) -0.0072(10) -0.0036(10)
 C3 0.0352(13) 0.0381(14) 0.0292(13) 0.0006(10) -0.0071(11) 0.0005(11)
 C4 0.0378(13) 0.0361(13) 0.0290(13) 0.0039(10) -0.0072(11) -0.0027(11)
 C5 0.0385(13) 0.0392(14) 0.0268(12) 0.0015(10) -0.0037(10) -0.0029(11)

_geom_special_details
;
 All esds (except the esd in the dihedral angle between two l.s. planes)
 are estimated using the full covariance matrix.  The cell esds are taken
 into account individually in the estimation of esds in distances, angles
 and torsion angles; correlations between esds in cell parameters are only
 used when they are defined by crystal symmetry.  An approximate (isotropic)
 treatment of cell esds is used for estimating esds involving l.s. planes.
;
loop_
  _geom_bond_atom_site_label_1
  _geom_bond_atom_site_label_2
  _geom_bond_distance
  _geom_bond_site_symmetry_2
  _geom_bond_publ_flag
 O1 C1 1.231(4) . ?
 O2 C4 1.226(3) . ?
 O3 C5 1.245(3) . ?
 N1 H1 0.8600 . ?
 N1 C1 1.373(4) . ?
 N1 C4 1.391(4) . ?
 N2 H2 0.8600 . ?
 N2 C1 1.373(3) . ?
 N2 C2 1.361(4) . ?
 N3 H3 0.8600 . ?
 N3 C3 1.378(4) . ?
 N3 C5 1.354(3) . ?
 N4 H4 0.8600 . ?
 N4 C2 1.363(3) . ?
 N4 C5 1.378(3) . ?
 C2 C3 1.357(4) . ?
 C3 C4 1.424(4) . ?

loop_
  _geom_angle_atom_site_label_1
  _geom_angle_atom_site_label_2
  _geom_angle_atom_site_label_3
  _geom_angle
  _geom_angle_site_symmetry_1
  _geom_angle_site_symmetry_3
  _geom_angle_publ_flag
 C1 N1 H1 115.8 . . ?
 C1 N1 C4 128.5(2) . . ?
 C4 N1 H1 115.8 . . ?
 C1 N2 H2 120.8 . . ?
 C2 N2 H2 120.8 . . ?
 C2 N2 C1 118.5(2) . . ?
 C3 N3 H3 125.9 . . ?
 C5 N3 H3 125.9 . . ?
 C5 N3 C3 108.2(2) . . ?
 C2 N4 H4 125.7 . . ?
 C2 N4 C5 108.7(2) . . ?
 C5 N4 H4 125.7 . . ?
 O1 C1 N1 122.1(2) . . ?
 O1 C1 N2 121.6(3) . . ?
 N2 C1 N1 116.3(2) . . ?
 N2 C2 N4 128.1(2) . . ?
 C3 C2 N2 124.4(2) . . ?
 C3 C2 N4 107.5(2) . . ?
 N3 C3 C4 131.2(3) . . ?
 C2 C3 N3 108.3(2) . . ?
 C2 C3 C4 120.5(3) . . ?
 O2 C4 N1 122.1(2) . . ?
 O2 C4 C3 126.1(3) . . ?
 N1 C4 C3 111.7(2) . . ?
 O3 C5 N3 126.8(3) . . ?
 O3 C5 N4 125.9(2) . . ?
 N3 C5 N4 107.3(2) . . ?

loop_
  _geom_hbond_atom_site_label_D
  _geom_hbond_atom_site_label_H
  _geom_hbond_atom_site_label_A
  _geom_hbond_distance_DH
  _geom_hbond_distance_HA
  _geom_hbond_distance_DA
  _geom_hbond_angle_DHA
  _geom_hbond_site_symmetry_A
  _geom_hbond_publ_flag
 N1 H1 O1 0.86 1.97 2.824(3) 173.5 3_766 yes
 N2 H2 O3 0.86 2.01 2.810(3) 155.2 2_545 yes
 N3 H3 O3 0.86 1.94 2.790(3) 169.7 3_576 yes
 N4 H4 O2 0.86 1.92 2.729(3) 156.4 4_575 yes


loop_
  _geom_torsion_atom_site_label_1
  _geom_torsion_atom_site_label_2
  _geom_torsion_atom_site_label_3
  _geom_torsion_atom_site_label_4
  _geom_torsion
  _geom_torsion_site_symmetry_1
  _geom_torsion_site_symmetry_2
  _geom_torsion_site_symmetry_3
  _geom_torsion_site_symmetry_4
  _geom_torsion_publ_flag
 N2 C2 C3 N3 -177.1(2) . . . . ?
 N2 C2 C3 C4 2.0(4) . . . . ?
 N3 C3 C4 O2 -0.7(5) . . . . ?
 N3 C3 C4 N1 178.9(3) . . . . ?
 N4 C2 C3 N3 0.7(3) . . . . ?
 N4 C2 C3 C4 179.8(2) . . . . ?
 C1 N1 C4 O2 176.6(3) . . . . ?
 C1 N1 C4 C3 -3.0(4) . . . . ?
 C1 N2 C2 N4 -178.6(3) . . . . ?
 C1 N2 C2 C3 -1.3(4) . . . . ?
 C2 N2 C1 O1 178.4(3) . . . . ?
 C2 N2 C1 N1 -1.4(4) . . . . ?
 C2 N4 C5 O3 179.2(3) . . . . ?
 C2 N4 C5 N3 -1.0(3) . . . . ?
 C2 C3 C4 O2 -179.6(3) . . . . ?
 C2 C3 C4 N1 0.0(4) . . . . ?
 C3 N3 C5 O3 -178.8(3) . . . . ?
 C3 N3 C5 N4 1.4(3) . . . . ?
 C4 N1 C1 O1 -176.1(3) . . . . ?
 C4 N1 C1 N2 3.8(4) . . . . ?
 C5 N3 C3 C2 -1.3(3) . . . . ?
 C5 N3 C3 C4 179.7(3) . . . . ?
 C5 N4 C2 N2 177.8(3) . . . . ?
 C5 N4 C2 C3 0.2(3) . . . . ?

_shelx_res_file
;
TITL urac_273k_a.res in P2(1)/n
    urac_273k.res
    created by SHELXL-2018/3 at 22:50:03 on 29-Apr-2019
REM Old TITL UrAc_273K in P2(1)/n
REM SHELXT solution in P2(1)/n: R1 0.178, Rweak 0.075, Alpha 0.092
REM <I/s> 0.395 for 99 systematic absences, Orientation as input
REM Formula found by SHELXT: C9 O3
CELL 1.54184 6.2025 7.4163 13.1147 90 90.378 90
ZERR 4 0.0004 0.0005 0.0008 0 0.006 0
LATT 1
SYMM 0.5-X,0.5+Y,0.5-Z
SFAC C H N O
UNIT 20 16 16 12

L.S. 20
PLAN  20
BOND $H
Htab
conf
list 4
fmap 2
acta
TWIN 1 0 0 0 -1 0 0 0 -1 2
OMIT -4 140
OMIT 1 2 2
OMIT -1 2 4
OMIT -1 2 6
OMIT 1 0 5
REM <olex2.extras>
REM <HklSrc "%.\\UrAc_273K.hkl">
REM </olex2.extras>

WGHT    0.080500    0.226700
EXTI    0.003224
BASF   0.08349
FVAR       4.04286
O1    4    0.924049    0.483419    0.367942    11.00000    0.04384    0.05965 =
         0.03808   -0.00142   -0.00704    0.01306
O2    4    0.582926    0.769644    0.629758    11.00000    0.05077    0.05478 =
         0.02484    0.00110   -0.00764    0.00133
O3    4   -0.029211    0.966418    0.359370    11.00000    0.04042    0.05196 =
         0.03013    0.00134   -0.00649    0.00727
N1    3    0.752913    0.635414    0.494946    11.00000    0.03548    0.04166 =
         0.03151    0.00221   -0.00928    0.00268
AFIX  43
H1    2    0.857088    0.606569    0.535355    11.00000   -1.20000
AFIX   0
N2    3    0.614037    0.632700    0.329217    11.00000    0.03861    0.04541 =
         0.02781   -0.00245   -0.00691    0.00303
AFIX  43
H2    2    0.618937    0.603361    0.265833    11.00000   -1.20000
AFIX   0
N3    3    0.236511    0.876829    0.474545    11.00000    0.03728    0.04146 =
         0.02656   -0.00216   -0.00331    0.00313
AFIX  43
H3    2    0.185697    0.920198    0.530253    11.00000   -1.20000
AFIX   0
N4    3    0.274013    0.798591    0.313813    11.00000    0.03646    0.04155 =
         0.02386   -0.00188   -0.00574    0.00220
AFIX  43
H4    2    0.249575    0.785158    0.249637    11.00000   -1.20000
AFIX   0
C1    1    0.772803    0.578399    0.395865    11.00000    0.03789    0.04013 =
         0.03479    0.00334   -0.00641   -0.00119
C2    1    0.448671    0.734047    0.365753    11.00000    0.03515    0.03509 =
         0.02785    0.00124   -0.00716   -0.00356
C3    1    0.427036    0.783032    0.464873    11.00000    0.03521    0.03807 =
         0.02923    0.00065   -0.00709    0.00047
C4    1    0.586243    0.733747    0.538497    11.00000    0.03780    0.03610 =
         0.02897    0.00392   -0.00718   -0.00266
C5    1    0.143078    0.888930    0.381158    11.00000    0.03847    0.03920 =
         0.02675    0.00154   -0.00374   -0.00293
HKLF 4


REM  urac_273k_a.res in P2(1)/n
REM wR2 = 0.1409, GooF = S = 1.093, Restrained GooF = 1.093 for all data
REM R1 = 0.0462 for 999 Fo > 4sig(Fo) and 0.0516 for all 1120 data
REM 111 parameters refined using 0 restraints

END

WGHT      0.0805      0.2267

REM Instructions for potential hydrogen bonds
EQIV $1 -x+2, -y+1, -z+1
HTAB N1 O1_$1
EQIV $2 -x+1/2, y-1/2, -z+1/2
HTAB N2 O3_$2
EQIV $3 -x, -y+2, -z+1
HTAB N3 O3_$3
EQIV $4 x-1/2, -y+3/2, z-1/2
HTAB N4 O2_$4

REM Highest difference peak  0.290,  deepest hole -0.199,  1-sigma level  0.050
Q1    1   0.4352  0.7818  0.5392  11.00000  0.05    0.29
Q2    1   0.4380  0.7974  0.6348  11.00000  0.05    0.28
Q3    1   0.4233  0.7031  0.4250  11.00000  0.05    0.19
Q4    1   0.0943  0.9750  0.5562  11.00000  0.05    0.17
Q5    1   0.5758  0.7177  0.4616  11.00000  0.05    0.17
Q6    1   0.2986  0.8534  0.6107  11.00000  0.05    0.16
Q7    1   0.9340  0.4980  0.2890  11.00000  0.05    0.16
Q8    1   0.2548  0.7821  0.4993  11.00000  0.05    0.14
Q9    1   0.9145  0.5149  0.5484  11.00000  0.05    0.14
Q10   1  -0.1418  1.1007  0.3725  11.00000  0.05    0.14
Q11   1  -0.1275  1.0493  0.3740  11.00000  0.05    0.14
Q12   1   0.0656  0.9847  0.4606  11.00000  0.05    0.14
Q13   1   0.5012  0.8260  0.3966  11.00000  0.05    0.13
Q14   1   0.1789  0.6419  0.3400  11.00000  0.05    0.13
Q15   1   0.9370  0.5118  0.4426  11.00000  0.05    0.13
Q16   1   0.2518  0.8539  0.1601  11.00000  0.05    0.13
Q17   1   1.0609  0.4456  0.3699  11.00000  0.05    0.13
Q18   1   0.7758  0.8846  0.6151  11.00000  0.05    0.12
Q19   1   0.7949  0.5837  0.3119  11.00000  0.05    0.12
Q20   1   0.7292  0.4296  0.4836  11.00000  0.05    0.11
;
_shelx_res_checksum                20919
_shelx_hkl_file
;
   0   0   1 5.12253 5.30074  15
   0   0  -1 5.26018 5.61958  13
   0   0   1 0.74320 6.74230   8
   0   0   2 36562.6 440.285  15
   0   0   2 37043.3 440.073   8
   0   0   3-2.29049 20.7791   8
   0   0   3 4.48133 18.6023  15
   0   0   4 60843.5 767.277   8
   0   0  -4 62205.9 749.489  11
   0   0   5 12.3069 25.9845   8
   0   0  -5 7.43936 19.9637  11
   0   0  -6 66501.5 900.792   4
   0   0   6 67014.2 902.772   8
   0   0  -6 66204.0 893.220  11
   0   0   7-6.38873 30.3934   8
   0   0  -7 32.4394 27.1320   4
   0   0   7 6.40575 24.3102   2
   0   0  -8 34553.8 635.704   4
   0   0   8 33267.9 630.295   8
   0   0   8 32989.6 621.601   2
   0   0  -9-9.44275 27.0892   4
   0   0   9 9.28388 26.6334   2
   0   0   9 9.29328 29.8072   8
   0   0  10 1468.64 135.477   2
   0   0  10 1603.32 90.4387   6
   0   0 -10 1456.46 136.565   4
   0   0  10 1638.37 141.777   8
   0   0  11 4.51002 27.4462   6
   0   0  12 7954.27 218.978   6
   0   0  13-4.43537 28.4520   6
   0   0  14 662.698 58.9071   6
   0   0  15 5.87631 22.4991   6
   0   0  16 586.053 39.0901   6
   0  -1   0 11.2995 5.70260   9
   0   1   0 3.56404 10.5051  16
   0   1   0 12.3936 7.33826  13
   0   1  -1 336.262 25.1710  13
   0   1   1 329.308 25.1717   7
   0  -1   1 362.381 22.2558  15
   0   1   1 332.801 19.0417  10
   0   1   1 345.519 20.6365  16
   0  -1   1 379.535 23.9417   9
   0  -1   2 40110.0 475.856  17
   0  -1   2 38939.1 472.956   9
   0   1   2 38334.8 429.140  16
   0   1   2 38667.0 459.441  10
   0   1   2 38877.6 474.231   7
   0  -1  -2 38070.7 418.609  11
   0  -1   2 38291.3 471.684  15
   0  -1   2 38659.5 463.959   8
   0   1  -2 38865.0 478.757  13
   0  -1   3 407.926 37.9507   8
   0  -1   3 376.974 36.2123  17
   0  -1   3 350.201 38.3082  15
   0   1   3 357.087 37.4050   7
   0  -1   4 6986.65 174.262   8
   0  -1   4 7167.91 182.619  15
   0   1   4 6957.21 170.542   8
   0  -1  -5 55.3081 26.2544   4
   0  -1   5 93.1504 31.8541   8
   0   1  -5 45.1004 25.4756  11
   0   1   5 49.6085 26.1917   8
   0   1   6 3976.42 157.451   8
   0  -1   6 4198.13 161.863   2
   0  -1   6 4171.58 164.227   8
   0  -1  -6 3828.04 160.685   4
   0   1  -6 3904.15 160.522   4
   0   1   7-6.39010 30.4001   8
   0   1  -7-12.9673 25.4695   4
   0  -1  -7 6.61119 23.2289   4
   0   1   7-6.51114 24.7103   2
   0   1  -7-20.3568 28.3771  11
   0  -1   7-19.2484 26.8321   2
   0  -1   7-13.1215 29.7593   8
   0   1  -8 2370.75 152.980  11
   0  -1   8 2275.98 145.244   8
   0   1  -8 2346.35 145.725   4
   0  -1   8 2261.83 141.505   2
   0   1   8 2149.37 142.005   2
   0  -1  -8 2341.27 146.087   4
   0   1   8 2164.21 138.797   8
   0   1  -9 310.240 64.0851   4
   0   1   9 452.905 73.3246   8
   0  -1   9 379.167 67.7531   2
   0   1   9 412.874 72.5881   2
   0   1  -9 461.902 76.9523  11
   0  -1   9 416.997 73.9384   8
   0  -1  -9 364.419 70.2505   4
   0  -1 -10 22.3107 33.9691   4
   0   1  10 141.302 50.5375   2
   0  -1  10 203.860 54.4286   2
   0   1  10 186.978 36.7635   6
   0  -1  10 126.570 34.6723   6
   0   1  10 85.9809 46.2676   8
   0  -1  10 189.341 36.3411  21
   0   1 -10 164.548 53.3766   4
   0   1  11 1742.04 99.7098   6
   0  -1  11 1732.68 95.1942  21
   0  -1  11 1785.74 98.4692   6
   0  -1  12 3221.97 131.026  21
   0  -1  12 3054.56 130.595   6
   0   1  12 3207.07 134.983   6
   0  -1  13 297.420 45.3212   6
   0   1  13 360.379 48.1562   6
   0  -1  13 353.376 46.7288  21
   0  -1  14 375.468 45.7184   6
   0   1  14 318.534 44.1058   6
   0   1  15-5.60290 21.4526   6
   0  -1  15 35.1842 22.6369   6
   0   1  16-3.47735 14.6486   6
   0  -1  16 1.62751 13.4106   6
   0   2   0 19706.4 301.644  16
   0   2   0 19753.7 304.385   7
   0   2   1 275.009 31.1123  16
   0   2   1 253.833 32.8287   7
   0  -2   2 3250.69 98.3001   9
   0   2   2 3416.88 109.811   7
   0  -2   2 3286.78 96.9979  15
   0   2   2 3301.28 90.7869  16
   0  -2   2 3301.11 112.821  17
   0  -2   3 2313.53 101.180  17
   0   2   3 2275.33 97.2821   7
   0  -2   3 2482.43 95.5141  15
   0   2   4 11922.1 262.909   7
   0  -2   4 12154.0 257.144  15
   0  -2   4 11611.5 249.077   8
   0   2  -4 11910.2 271.719  11
   0  -2   4 12582.7 266.810  17
   0  -2   5 2609.77 118.011   8
   0   2  -5 2555.75 127.862  11
   0  -2   6 2267.21 123.864   8
   0   2  -6 2282.51 134.476  11
   0  -2   7 1202.15 98.8334   8
   0   2  -7 1209.44 106.212  11
   0   2  -8 2985.13 181.184  11
   0  -2   9 2648.39 112.101  21
   0   2  -9 2673.77 183.855  11
   0  -2  10 94.6934 33.2542  21
   0   2 -10 24.7782 39.7419  11
   0   2  11 2078.46 105.159   6
   0  -2  11 2081.35 106.897  21
   0   2  12 817.547 68.3818   6
   0  -2  12 696.580 65.5350  21
   0   2  13 145.573 35.5050   6
   0  -2  13 179.975 37.6024  21
   0  -2  14 1061.91 67.8771  21
   0   2  14 1061.44 66.3365   6
   0   2  15 11.3711 19.5747   6
   0   2 -15 49.2613 21.3231  23
   0   3   1 1170.25 77.3014   7
   0  -3   2 20782.6 388.170  17
   0   3   2 21037.2 377.980   7
   0   3  -3 676.117 61.8637  11
   0  -3   3 614.305 64.6285  17
   0   3   3 625.044 61.9049   7
   0  -3   4 1788.69 109.738  17
   0   3   4 1793.72 106.840   7
   0   3  -4 1668.04 106.313  11
   0   3  -5 1550.11 110.700  11
   0  -3   5 1600.01 109.673  17
   0   3   5 1481.74 102.698   7
   0   3  -6 3740.25 185.384  11
   0   3  -7 600.823 84.8421  11
   0   3  -8 229.506 66.5827  11
   0  -3   8 351.574 44.1645  21
   0  -3   9 484.558 52.4528  21
   0   3  -9 469.616 85.1480  11
   0  -3  10 2335.53 113.168  21
   0  -3  11 418.000 52.3023  21
   0   3 -12 302.362 46.3718  30
   0  -3  12 319.308 46.0054  21
   0   3 -13 3160.97 118.521  30
   0  -3  13 3101.90 120.710  21
   0  -3  14 70.9878 26.1579  21
   0   3 -14 32.5475 21.3143  30
   0   3 -15 17.1208 14.7229  23
   0   4   0 2567.50 132.829   7
   0  -4   1 355.023 53.7750  17
   0   4   1 382.884 55.1138   7
   0  -4   2 2221.84 129.802  17
   0   4   2 2398.48 131.032   7
   0   4   3 1075.07 91.6135   7
   0  -4   3 857.348 84.5721  17
   0  -4   4 13571.2 364.989  17
   0   4   4 13789.8 358.869   7
   0  -4   5 8219.71 289.506  17
   0   4   5 8156.46 281.188   7
   0   4  -7 2161.52 102.358  24
   0   4   7 2279.38 101.786  20
   0   4  -7 2227.17 106.542  28
   0   4  -7 2319.03 172.596  11
   0   4   8 623.292 57.2394  20
   0   4  -8 553.274 95.1427  11
   0   4  -8 531.671 56.9978  28
   0   4   9 2746.41 116.472  20
   0   4  -9 2710.18 124.156  28
   0  -4  10 5114.48 165.457  21
   0   4 -10 5374.52 173.871  28
   0  -4  11 424.053 50.7756  21
   0   4 -12 4837.84 152.589  30
   0  -4  12 4852.06 150.829  21
   0   4 -13 1951.26 86.3036  30
   0  -4  13 1661.96 79.6379  21
   0   4 -14 572.062 41.1807  30
   0  -5   0 41.2286 32.3917  17
   0   5   0 8.30341 30.3661   7
   0   5  -1 245.778 54.4267   7
   0  -5   1 239.495 52.8332  17
   0   5   1 296.316 57.8967   7
   0  -5   2 312.789 61.5812  17
   0   5   2 426.301 69.2737   7
   0   5  -2 353.353 63.4566   7
   0   5  -3 947.956 102.123   7
   0  -5   3 1074.90 109.715  17
   0   5   3 977.367 102.566   7
   0  -5   4 112.605 44.0548  17
   0   5   4 38.0230 34.7676   7
   0   5  -4 45.1175 25.3025  24
   0   5   4 58.3736 25.9097  20
   0   5  -4 89.8821 39.2355   7
   0   5  -5 1398.03 83.6216  24
   0   5   5 1449.23 83.3148  20
   0  -5   5 1414.91 135.131  17
   0   5   5 1255.74 122.427   7
   0   5  -5 1382.22 84.5682  28
   0   5  -6 1129.99 78.2370  28
   0   5   6 1129.94 76.8711  20
   0   5  -6 1164.07 77.5546  24
   0   5  -7 168.902 37.8111  28
   0   5   7 167.912 39.0973  20
   0   5  -7 190.976 39.8223  24
   0   5  -8 747.034 68.7372  28
   0   5   8 731.061 65.2811  20
   0   5   9 298.819 47.0419  20
   0   5  -9 272.495 45.7942  28
   0   5  10 84.5846 32.8694  20
   0   5 -11 1215.12 74.6873  30
   0   5 -12 510.964 46.5164  30
   0   5 -13-4.30120 16.6122  30
   0   6   0 2213.96 113.489  29
   0   6  -1 1347.79 89.4050  29
   0   6  -1 1173.53 120.302   7
   0  -6   2 781.844 105.858  17
   0   6  -2 721.756 69.4534  29
   0   6  -4 459.238 51.6595  24
   0   6   5 67.6170 31.2151  20
   0   6  -5 91.2054 31.4684  24
   0   6  -6 511.774 57.2126  24
   0   6   6 578.246 58.8089  20
   0   6  -6 549.569 58.5226  28
   0   6   7 3104.48 128.679  20
   0   6  -7 2975.93 128.969  28
   0   6   8 305.118 46.2409  20
   0   6  -8 328.487 45.2844  31
   0   6   9 117.870 32.5907  20
   0   6  10 43.7270 24.9480  20
   0   6  11 319.208 34.2276  20
   0   7   0-20.4554 29.3417  29
   0   7  -1 272.456 46.4223  29
   0   7  -2 144.187 39.8030  29
   0   7  -3 281.788 47.1397  29
   0   7  -4 115.951 38.6214  29
   0   7  -5 1152.81 84.7129  29
   0   7   6 225.321 38.7462  20
   0   7  -6 314.316 47.8808  29
   0   7  -7 251.275 40.3838  31
   0   7   7 207.243 37.0277  20
   0   7  -7 258.342 42.5884  29
   0   7  -8 32.2961 22.6960  31
   0   7  -8 22.3072 24.7288  29
   0   7   8 21.2087 22.7917  20
   0   7  -9 132.374 28.8212  29
   0   7   9 149.323 27.4441  20
   0   7  10 160.671 23.8189  20
   0   7 -10 176.743 27.1512  29
   0   8  -2 568.169 55.4509  29
   0   8  -3 118.161 30.7081  29
   0   8  -4 3.36433 22.1145  31
   0   8  -4 7.18661 22.1691  29
   0   8  -5 1219.83 69.9005  31
   0   8  -5 1197.84 69.9817  29
   0   8  -6 537.360 45.6054  31
   0   8  -6 579.020 47.2572  29
   0   8  -7 1216.37 59.2026  31
   0   8  -7 1254.16 61.0571  29
   0   8  -8 463.788 32.1719  31
  -1   0  16 1.74400 14.2612   6
  -1   0  15 1659.31 76.7051   6
  -1   0  14-3.71925 23.2541   6
  -1   0  13 986.585 74.8668   6
  -1   0  12 18.5083 27.7652   6
  -1   0  11 2223.63 111.931   6
  -1   0  10-8.43543 26.3707   6
   1   0 -10-11.2922 30.3026   4
  -1   0  10 33.2212 33.6951   2
   1   0  -9 1135.55 114.572   4
  -1   0   9 1019.91 106.333   2
  -1   0   8 8.07908 23.1772   2
  -1   0   7 3325.70 165.113   2
  -1   0   7 3977.93 174.973  15
  -1   0   6 5.37128 26.1273  15
  -1   0   6-5.53389 23.8134   2
   1   0  -6-14.4433 20.7175  13
  -1   0   5 25306.6 422.371  15
  -1   0   5 24718.8 423.778   2
   1   0  -5 24628.2 413.053  13
   1   0  -4 9.75113 20.3229  13
  -1   0   4 6.92005 19.8524  15
  -1   0   4 21.3449 22.2429   2
  -1   0   3 7598.38 172.292   2
  -1   0   2-2.03863 19.0637  12
  -1   0   2 28.6271 18.9523   2
  -1   0   1 20146.3 275.135  14
   1   0   0 2.21783 4.37225   7
   1   0   0 4.62671 13.5467   3
   1   0   1 3309.73 86.6670   1
   1   0   1 3248.89 85.9463   9
   1   0   2-4.28187 17.2357   9
   1   0   3 2508.38 92.4626  10
  -1   0  -3 2486.65 93.2893   4
   1   0   3 2487.16 92.6946   9
  -1   0  -4 6.94206 20.8279  11
   1   0   4 3.61065 18.6734   9
   1   0   4 7.26793 20.8501  10
  -1   0  -4-14.9071 20.0016   4
   1   0   5 4326.17 157.775  10
  -1   0  -5 4356.78 154.558   4
  -1   0  -5 4668.65 155.494  11
   1   0   6-5.59368 27.7943   8
  -1   0  -6 17.2083 26.0186   4
  -1   0  -6 5.25746 26.1237  11
   1   0   7 11902.9 320.797   8
  -1   0  -7 11073.5 322.514   4
  -1   0  -8-8.42383 28.3376   4
   1   0   8 57.6232 40.0422   8
  -1   0  -9 8245.16 311.432   4
   1   0   9 8500.90 308.949   8
   1   0  10 4.25018 27.6027   6
   1   0  10-22.3671 27.7849   2
   1   0  10 33.4870 45.2864   8
   1   0  11 2725.56 122.553   6
   1   0  12 13.9244 31.5805   6
   1   0  13 547.870 58.7609   6
   1   0  14-3.69253 23.9811   6
   1   0  15 252.592 34.3420   6
   1   0  16-17.1179 13.5613   6
  -1   1  16 39.4124 15.3419   6
  -1   1  15 92.8992 25.6938   6
  -1  -1  15 69.7959 24.4687   6
  -1  -1  14-14.0452 21.9540   6
  -1   1  14 35.7833 26.4224   6
  -1  -1  13 2650.95 113.810  21
  -1   1  13 2658.01 117.339   6
  -1  -1  13 2608.45 116.699   6
  -1  -1  12 1433.82 88.8689   6
  -1   1  12 1485.65 91.6040   6
  -1  -1  12 1242.34 81.8690  21
  -1  -1  11 368.860 49.3296  21
  -1  -1  11 325.866 48.2517   6
  -1   1  11 343.572 48.6465   6
  -1   1  10 2466.79 112.215   6
  -1   1  10 2463.82 177.856   2
   1  -1 -10 1962.71 164.531   4
  -1  -1  10 2216.38 169.136   2
  -1  -1  10 2584.16 114.390   6
  -1  -1  10 2565.59 111.821  21
   1   1 -10 2480.76 181.644   4
  -1   1   9 256.530 58.7001   2
  -1  -1   9 316.455 64.5925   2
   1  -1  -9 325.935 64.9969   4
   1   1  -9 371.440 68.0395   4
  -1  -1   8 363.531 62.4821  15
  -1  -1   8 248.393 53.3584   2
   1   1  -8 254.581 55.3152  11
  -1   1   8 228.190 52.9943   2
  -1  -1   7 7346.26 245.289   2
  -1   1   7 7310.56 243.551   2
  -1   1   7 8103.97 253.269   8
  -1  -1   7 7825.21 259.320  15
  -1  -1   6 3211.37 146.233   2
  -1   1   6 3197.36 145.212   8
   1   1  -6 3483.66 154.402  13
  -1   1   6 3110.01 142.918   2
  -1   1   5 780.408 65.7386   2
  -1   1   5 841.556 66.4461  15
  -1   1   5 938.220 70.5537   8
  -1  -1   5 698.524 62.7468   2
   1   1  -5 972.118 75.5660  13
  -1  -1   5 972.612 74.8668  15
   1   1  -4 1250.39 78.2136  13
  -1   1   4 1079.20 64.0131  15
  -1   1   4 1080.37 68.1669   2
  -1   1   4 1065.35 66.5557   8
  -1  -1   4 1034.01 71.6874  15
  -1  -1   4 989.225 64.8404   2
   1   1  -3 1223.20 73.0659  13
  -1  -1   3 1226.30 58.9509  17
  -1   1   3 1286.09 61.2807  15
   1   1  -3 1367.65 64.3184  16
  -1   1   3 1304.82 67.6248   2
  -1  -1   3 1402.22 71.3271   2
   1   1  -2 54325.5 637.049  16
  -1   1   2 52176.6 632.919   2
  -1   1   2 52752.1 610.504  12
  -1  -1   2 53465.5 649.117  12
   1   1  -1 753.507 44.5052  16
  -1   1   1 723.831 30.1994   7
  -1   1   1 757.711 40.1795  14
  -1  -1   1 676.577 38.9094  14
   1  -1  -1 710.052 37.8858   3
   1   1  -1 709.908 39.9901   3
   1  -1   0 5189.29 105.022   3
   1   1   0 5351.06 110.920   3
  -1   1   0 5263.21 86.7076   7
   1   1   1 114.931 15.4629   9
   1   1   1 169.983 22.7712   7
   1  -1   1 110.133 24.3697   9
   1  -1   1 128.693 20.8016   1
   1   1   1 93.4071 19.4313   1
   1   1   2 29622.9 370.841   9
   1  -1   2 29050.2 417.518   9
  -1   1  -2 30236.2 417.078  11
   1   1   2 29098.6 396.197   7
   1  -1   2 29513.0 383.827  10
  -1   1  -3 6880.04 173.466  11
   1   1   3 6765.63 146.764   9
   1  -1   3 6793.21 174.867   9
   1  -1   3 6590.63 154.466  10
   1   1   3 6930.30 169.154  10
   1   1   3 6978.12 163.841   7
  -1  -1  -4 800.466 60.8938   4
  -1   1  -4 831.559 62.7580   4
  -1   1  -4 838.009 67.2582  11
   1  -1   4 808.993 64.1972   9
   1   1   4 832.368 62.3750  10
   1  -1   5 1597.35 98.4268   9
  -1   1  -5 1650.63 99.9228  11
   1  -1   5 1501.47 91.4577   8
   1   1   5 1722.92 98.8415  10
  -1   1  -5 1537.55 92.2070   4
  -1  -1  -5 1565.91 95.2883   4
  -1  -1  -6 891.744 79.0444   4
   1  -1   6 996.635 82.1755   8
  -1   1  -6 1027.10 85.5266  11
  -1   1  -7 1520.21 110.092   4
  -1  -1  -7 1254.23 103.329   4
   1  -1   7 1482.66 109.235   8
  -1   1  -7 1546.50 116.330  11
   1   1   7 1604.57 114.867   8
  -1  -1  -8 162.968 47.6795   4
  -1   1  -8 150.593 46.5082   4
   1   1   8 176.871 47.5930   8
  -1   1  -8 179.315 49.7801  11
   1  -1   8 179.807 48.3659   8
  -1   1  -9 2108.28 153.820  11
   1   1   9 1948.96 147.797   8
   1  -1   9 2027.36 149.248   8
  -1   1  -9 2120.10 159.757   4
   1   1  10 680.135 62.6040   6
   1   1  10 495.111 87.9024   8
   1   1  10 665.372 93.8493   2
   1  -1  10 706.517 63.7888   6
   1  -1  10 856.451 107.811   8
   1  -1  10 653.408 94.8681   2
   1  -1  10 575.999 57.2219  21
   1  -1  11 588.898 60.3621   6
   1  -1  11 671.947 62.3641  21
   1   1  11 648.873 64.0290   6
   1  -1  12 2986.61 128.120   6
   1  -1  12 3109.74 128.579  21
   1   1  12 3302.25 134.329   6
   1  -1  13 505.258 53.8902   6
   1   1  13 566.562 58.6883   6
  -1   1 -14 59.8362 26.0071  23
   1   1  14 32.1684 29.6765   6
   1  -1  14 24.1924 24.2889   6
   1   1  15 45.0817 21.5193   6
  -1   1 -15 16.2357 18.2073  23
   1  -1  15 25.3152 19.5564   6
   1   1  16 116.608 19.2142   6
  -1  -2  15 286.405 31.4081  21
  -1  -2  14 1666.89 82.0981  21
  -1   2  14 1518.53 77.0185   6
  -1   2  13 1358.93 80.5582   6
  -1  -2  13 1447.49 84.4361  21
  -1   2  12 144.764 35.6323   6
  -1  -2  12 102.073 34.0057  21
  -1  -2  11 7240.24 203.641  21
   1   2 -10 2810.88 201.875  11
  -1  -2  10 2971.36 125.771  21
  -1   2   9 1728.74 101.522  26
   1   2  -9 1852.46 152.625  11
  -1  -2   9 1741.74 92.1760  21
   1   2  -8 2145.36 154.391  11
  -1  -2   7 22527.2 490.706  15
   1   2  -6 3745.37 172.390  13
  -1  -2   6 3713.01 172.718  15
  -1  -2   5 12090.2 291.713  15
   1   2  -5 12153.8 301.424  13
  -1  -2   4 2347.92 113.514  15
   1   2  -4 2450.33 120.401  13
   1   2  -3 12105.8 258.564  16
   1   2  -3 11852.9 264.872  13
  -1   2   3 11830.0 231.414   7
   1   2  -2 59618.9 765.019  13
  -1  -2   2 60627.7 745.029  12
  -1   2   2 60132.9 724.285   7
   1   2  -2 61348.2 771.098  16
  -1   2   1 207733. 2172.21   7
   1   2  -1 205195. 2237.27  16
  -1  -2   1 207575. 2185.51  12
   1   2   0 123497. 1386.52  16
  -1   2   0 121047. 1333.99   7
   1  -2   0 121843. 1354.38  17
   1  -2   1 46732.7 601.781   9
   1   2   1 46038.3 609.108  16
   1  -2   1 46284.4 600.310  17
   1   2   1 45466.5 603.003   7
  -1   2  -2 8796.30 202.127  11
   1   2   2 8477.58 196.586   7
   1  -2   3 54965.3 737.986   9
  -1   2  -3 55458.4 742.009  11
   1   2   3 54426.2 711.988  10
   1   2   3 54799.2 729.519   7
   1  -2   4 16825.2 351.272   9
   1   2   4 17389.8 332.816  10
   1   2   4 17210.9 342.305   7
   1   2   5 1875.28 107.174  10
  -1   2  -5 1668.60 111.488  11
   1  -2   5 2038.11 119.379   9
  -1   2  -6 25800.2 525.422  11
  -1   2  -7 19654.4 462.911  11
   1   2   7 18343.5 429.928   8
   1   2   8 270.521 57.4304   8
  -1   2  -8 301.626 64.7748  11
  -1   2  -9 1003.45 113.342  11
   1  -2   9 920.562 67.3183  21
  -1   2 -10 1571.54 149.933  11
   1  -2  10 1823.35 97.8706  21
  -1   2 -10 1769.59 96.9615  30
   1   2  11 16595.0 329.067   6
   1  -2  11 16557.3 330.508  21
  -1   2 -11 16581.7 327.402  30
   1   2  12 653.301 61.9914   6
  -1   2 -12 685.316 61.4007  30
   1  -2  12 620.202 61.2300  21
   1   2  13 649.977 59.1268   6
  -1   2 -14 870.579 64.0214  23
   1   2  14 834.637 58.2597   6
   1   2  15 1597.04 65.1124   6
  -1   2 -15 1641.98 72.7280  23
   1   3 -15 92.6286 20.9852  23
  -1  -3  14 143.911 29.2223  21
  -1  -3  13 375.689 46.0612  21
  -1  -3  12 969.724 73.2721  21
  -1  -3  11 2041.52 104.928  21
  -1   3  10 61.8865 32.2881  26
  -1  -3  10 85.2736 31.8732  21
  -1   3   9 209.124 41.4787  26
  -1  -3   9 224.793 39.0181  21
   1   3  -9 247.783 64.1119  11
  -1   3   8 1263.52 86.5061  26
  -1  -3   8 1359.87 80.0426  21
   1   3  -8 1450.01 83.2749  28
   1   3  -8 1396.66 135.457  11
   1   3  -7 161.975 52.9558  11
   1   3  -5 2079.20 129.174  13
  -1  -3   5 2409.90 131.288  17
   1   3  -4 406.748 57.5435  13
  -1  -3   4 557.883 62.3666  17
   1   3  -3 3298.13 142.012  13
   1   3  -2 7585.22 221.221  16
   1   3  -1 33.5714 23.8307   7
   1   3  -1-4.84907 23.5875  16
   1   3   0 533.887 57.3293  16
   1  -3   0 520.398 51.3220  17
   1   3   0 525.666 56.8604   7
   1  -3   1 78.9624 29.5314  17
   1   3   1 130.999 33.5697   7
   1   3   1 103.860 30.3977  16
   1   3   2 3912.96 152.757   7
   1   3   2 3763.78 142.678  16
   1  -3   2 3827.44 150.988  17
   1   3   3 1189.22 88.6339   7
   1  -3   3 1110.69 88.0333  17
   1   3   4 3174.24 150.408   7
  -1   3  -4 3281.13 151.706  11
  -1   3  -5 560.364 73.0931  11
   1   3   5 595.827 70.8549   7
  -1   3  -6 3141.45 175.971  11
  -1   3  -7 947.182 105.237  11
  -1   3  -8 1545.19 141.508  11
   1  -3   8 1483.96 82.9950  21
  -1   3  -8 1517.76 86.5978  28
   1  -3   9 59.6922 31.7889  21
  -1   3  -9 134.589 52.6569  11
   1  -3  10 31.5346 27.4183  21
  -1   3 -10 54.2426 32.7438  30
  -1   3 -11 3207.39 133.103  30
   1  -3  11 3254.22 134.696  21
   1  -3  12 1690.20 93.0833  21
  -1   3 -12 1698.06 92.9932  30
  -1   3 -13 111.917 31.5543  30
  -1   3 -13 145.041 34.6844  23
  -1   3 -14 20.9074 21.2064  30
  -1   3 -14 15.1164 19.8734  23
  -1   3 -15 33.4518 15.8449  23
   1   4 -14 1.99243 16.7865  30
  -1  -4  14 2.04192 15.2190  21
  -1  -4  13 827.129 55.8342  21
   1   4 -13 825.064 57.3166  30
  -1  -4  12 64.9663 28.1260  21
  -1  -4  11 1880.64 97.0013  21
   1   4 -11 1687.30 93.8126  28
  -1   4  10 461.036 59.5046  26
  -1  -4  10 404.396 49.3521  21
   1   4 -10 411.627 50.9890  28
   1   4  -9 168.426 39.1802  28
  -1   4   9 156.920 41.0374  26
  -1   4   9 287.631 44.7890  20
   1   4  -8 3025.30 208.671  11
  -1   4   8 3189.39 126.016  20
   1   4  -8 3100.26 130.216  28
  -1   4   8 3124.14 141.975  26
   1   4  -8 3153.62 127.215  24
  -1   4   7 408.250 52.9042  26
   1   4  -7 324.084 44.2260  24
   1   4  -7 276.395 66.4356  11
  -1   4   7 337.732 44.4971  20
   1   4  -7 432.829 50.9997  28
  -1  -4   5 593.575 79.0465  17
  -1  -4   4 1224.11 105.022  17
  -1  -4   3 2478.70 146.443  17
   1   4  -2 2674.54 149.781   7
   1   4  -1 7130.61 239.511  16
   1   4  -1 7448.50 245.392   7
   1   4   0 1222.72 96.9158   7
   1   4   0 1045.96 89.4144  16
   1  -4   1 1245.19 93.7041  17
   1   4   1 1161.68 95.3811   7
   1   4   2 612.582 70.3887   7
   1  -4   2 530.736 69.2467  17
   1   4   3 4757.09 203.323   7
   1  -4   3 4754.27 206.738  17
   1   4   4 2757.04 160.568   7
   1   4   5 70.6011 34.6743   7
   1   4   6 4529.92 225.731   7
  -1   4  -7 644.177 60.7591  31
  -1   4  -7 641.099 60.7381  28
  -1   4  -8 585.600 60.5446  28
  -1   4  -8 398.758 85.0690  11
   1   4   9 1179.63 78.5371  20
  -1   4  -9 1179.48 81.1490  30
  -1   4 -10 227.983 45.8475  30
   1  -4  11 410.894 51.0809  21
  -1   4 -11 530.164 56.6441  30
  -1   4 -12 48.7271 25.7916  23
  -1   4 -12 77.2986 29.4031  30
  -1   4 -13 1695.56 79.5790  23
  -1   4 -13 1722.33 79.2566  30
  -1   4 -14 8.08902 16.2802  30
  -1   4 -14-2.02584 14.0867  23
   1   5 -13 563.127 39.4034  30
   1   5 -12 443.542 42.4398  30
   1   5 -11 325.161 42.2116  28
  -1   5  10 497.502 52.0694  20
  -1   5  10 466.251 56.4749  26
   1   5 -10 573.013 58.4103  28
  -1   5   9 46.3076 28.3250  20
  -1   5   9 32.3856 28.4489  26
   1   5  -9 23.2616 30.5825  28
  -1   5   8 117.233 35.8274  26
   1   5  -8 120.713 33.9516  24
  -1   5   8 87.7792 33.3304  20
   1   5  -8 114.780 35.6620  28
   1   5  -7 744.709 68.1989  28
  -1   5   7 772.128 74.0644  26
   1   5  -7 815.332 68.8024  24
   1   5  -7 753.839 68.0591  18
  -1   5   7 730.688 65.5106  20
   1   5  -6 396.781 52.1172  28
  -1   5   6 359.326 47.3577  20
   1   5  -6 415.892 51.0437  24
  -1   5   5 717.811 68.8125  29
  -1   5   5 714.625 61.5699  20
   1   5  -5 667.537 62.0150  18
   1   5  -5 714.188 61.5739  28
  -1  -5   5 511.981 85.8358  17
   1   5  -5 597.830 58.5670  24
  -1   5   4 3442.62 125.322  20
   1   5  -4 3259.57 131.171  18
  -1   5   4 3268.00 137.709  29
   1   5  -4 3203.21 197.015   7
   1   5  -4 3107.47 123.489  24
  -1  -5   4 3563.94 203.701  17
   1   5  -3 117.326 30.9533  18
  -1   5   3 41.5855 28.5212  29
   1   5  -3 110.707 42.0977   7
  -1  -5   3 78.7202 39.9317  17
   1   5  -3 112.226 28.4077  24
   1   5  -2 200.529 54.8241   7
  -1  -5   2 199.750 54.6114  17
   1   5  -1 681.439 87.8785   7
   1   5   0 3032.73 178.468   7
   1   5   1 1069.28 105.641   7
   1   5   2 167.411 47.1954   7
   1  -5   2 164.460 49.0641  17
   1  -5   3 88.9234 43.6919  17
   1   5   3 97.5447 41.9854   7
   1   5   4 759.926 96.8869   7
   1   5   5 3045.11 195.668   7
  -1   5  -5 2925.82 122.016  28
   1   5   7 95.3112 33.7653  20
  -1   5  -7 95.2178 33.8149  31
  -1   5  -8 102.747 34.1741  31
   1   5   8 103.894 34.5876  20
  -1   5  -9 161.376 37.0960  30
   1   5   9 140.656 35.6354  20
   1   5  10 655.414 57.6835  20
  -1   5 -10 715.731 61.8758  30
  -1   5 -11 1023.36 67.4553  30
  -1   5 -12 47.1107 23.1828  30
  -1   5 -13 469.019 35.9283  30
   1   6 -12 767.869 40.3966  30
  -1   6  11 1097.14 57.0327  20
   1   6 -11 1192.69 58.5498  30
  -1   6  10 252.011 37.6484  26
  -1   6  10 181.703 33.0069  20
  -1   6   9 705.577 63.3964  26
  -1   6   9 673.650 58.3830  20
   1   6  -9 726.400 61.5045  28
  -1   6   8 2590.76 114.313  20
  -1   6   8 2706.67 128.551  26
   1   6  -8 2536.96 115.305  28
  -1   6   7 1447.69 97.0127  26
  -1   6   7 1368.52 87.0575  20
   1   6  -7 1449.50 90.4997  28
   1   6  -7 1342.50 86.3268  24
  -1   6   6 5810.36 177.903  20
   1   6  -6 5636.36 178.955  28
   1   6  -6 5856.74 179.467  24
   1   6  -5 278.428 45.1957  24
  -1   6   5 313.483 50.6352  29
  -1   6   5 341.575 47.9321  20
   1   6  -4 192.545 39.1546  18
   1   6  -4 154.886 35.3918  24
  -1   6   4 243.125 47.4940  29
  -1   6   3 192.648 41.7206  29
   1   6  -3 120.938 33.1121  24
   1   6  -3 181.346 39.3546  18
  -1   6   2 608.451 65.7331  29
   1   6  -2 510.918 54.9995  24
  -1   6   1 2761.02 131.524  29
  -1  -6   1 2563.11 186.515  17
  -1   6   0 2808.51 132.942  29
  -1  -6   0 2715.90 190.505  17
  -1   6  -1 1433.99 96.9509  29
  -1   6  -2 2758.45 132.118  29
  -1   6  -3 731.726 73.1692  29
   1   6   5 88.6240 32.6104  20
   1   6   6 1748.49 95.4360  20
  -1   6  -6 1792.84 103.020  31
   1   6   7 608.318 60.1571  20
  -1   6  -7 561.694 60.5199  31
  -1   6  -8 2078.76 104.082  31
   1   6   8 1997.66 99.4007  20
  -1   6  -9 685.552 58.5983  31
   1   6   9 726.688 58.6180  20
   1   6  10 219.355 34.8715  20
   1   6  11 1545.33 65.6729  20
  -1   6 -12 690.597 42.6634  29
  -1   7   9 33.7735 18.7973  20
  -1   7   8 664.704 53.3334  20
  -1   7   8 889.038 62.4985  26
  -1   7   7 33.0983 24.2095  20
  -1   7   7 20.6464 22.1634  26
  -1   7   6 10.6915 23.7045  20
   1   7  -6 26.4355 26.5389  24
  -1   7   6 50.6834 28.0412  26
   1   7  -5 143.485 34.3318  24
  -1   7   4 5.04479 26.0907  29
   1   7  -4 16.4030 24.6067  24
   1   7  -3 351.480 46.4258  24
  -1   7   3 260.827 48.0094  29
  -1   7   2 85.0238 37.7381  29
  -1   7   1 5.36842 28.8123  29
  -1   7   0 123.974 41.2937  29
  -1   7  -1 21.5653 29.4482  29
  -1   7  -2 85.6347 34.7700  29
  -1   7  -3 22.5991 27.5062  31
  -1   7  -3 5.28037 29.8196  29
  -1   7  -4 41.1796 31.7588  29
  -1   7  -4 22.5611 27.4612  31
  -1   7  -5 592.381 63.1848  29
  -1   7  -5 539.417 57.4102  31
  -1   7  -6 198.070 37.9403  31
  -1   7  -6 189.402 41.4180  29
   1   7   6 153.860 31.3724  20
  -1   7  -7 70.6545 27.4741  31
   1   7   7 113.748 30.4045  20
  -1   7  -7 100.361 31.7529  29
   1   7   8 266.990 35.7428  20
  -1   7  -8 213.644 37.1704  29
  -1   7  -8 240.754 35.7145  31
   1   7   9 68.5737 21.8574  20
  -1   7  -9 41.9722 19.2434  31
  -1   7  -9 67.7741 23.5403  29
   1   7  10 57.4795 17.3217  20
  -1   7 -10 75.6351 20.4543  29
   1   8  -7 79.0027 19.9357  31
  -1   8   6 507.758 42.9928  26
   1   8  -6 474.575 40.7682  31
  -1   8   5 158.192 30.4069  26
   1   8  -4 102.623 25.0248  24
  -1   8   3 353.524 44.1004  29
  -1   8   2 24.1031 27.3336  29
  -1   8   1 45.6963 26.9832  29
  -1   8   0 484.242 52.8744  29
  -1   8  -1 41.9280 27.8894  29
  -1   8  -2 61.4999 29.4113  29
  -1   8  -3 750.315 61.7907  29
  -1   8  -4 34.1725 22.5053  31
  -1   8  -4 44.0710 24.7117  29
  -1   8  -5 26.0267 20.7430  31
  -1   8  -5 46.6307 25.5078  29
  -1   8  -6 214.829 30.5333  31
  -1   8  -6 173.577 30.1286  29
  -1   8  -7 283.218 29.6617  31
  -1   8  -7 210.833 28.6350  29
  -1   9   0-10.2213 14.6616  29
  -1   9  -1 8.12073 13.6591  29
  -1   9  -2 125.270 21.5381  29
  -2   0  15 28.4815 18.6491   6
  -2   0  14 615.800 53.4121   6
  -2   0  13-4.07389 26.4578   6
  -2   0  12 5955.57 184.023   6
  -2   0  11-27.7940 29.7167   6
  -2   0  10 6434.50 190.301   6
  -2   0   9 12.2726 25.5776   6
  -2   0   9-10.1307 32.4930  15
  -2   0   8 8648.88 300.995  15
  -2   0   7-7.58070 25.5011  15
  -2   0   6 3420.56 159.939  15
   2   0  -5 15.9349 26.3934  13
  -2   0   4 31675.6 509.439  12
  -2   0   3 19.7142 23.3193  12
   2   0  -2 11456.2 236.823   3
  -2   0   2 9968.69 225.557  14
   2   0  -1-16.7559 23.0532   3
  -2   0   1 3.27683 24.1961  14
   2   0   0 52.6587 25.4278   3
   2   0   1 50.8811 25.0480   1
   2   0   1 9.65485 19.8567   9
   2   0   2 53940.1 707.444   1
   2   0   2 54070.6 703.894   9
   2   0   3 8.17325 22.7029   9
   2   0   4 75564.7 973.913  10
   2   0   4 74558.0 974.680   9
   2   0   5 11.4825 24.0097  10
   2   0   5 5.69777 22.3823   9
   2   0   6 2041.92 128.070  10
   2   0   6 1927.18 125.476   9
   2   0   8 789.839 100.494   8
   2   0   9 21.5173 32.7398   8
   2   0   9 74.3271 33.5089   6
   2   0  10 42299.3 615.207   6
   2   0  11-4.65177 30.5770   6
   2   0  12 2329.25 113.157   6
   2   0  13-16.2177 28.7864   6
   2   0  14 5395.21 151.052   6
   2   0  15-11.5955 17.4446   6
  -2   1  15 207.190 27.6136   6
  -2  -1  15 140.417 24.1605   6
  -2   1  14 88.6804 27.6465   6
  -2  -1  14 81.3247 27.6701   6
  -2   1  13 1096.86 74.6348   6
  -2  -1  13 1293.63 77.4115  21
  -2  -1  13 1300.67 80.2217   6
  -2   1  12 2912.03 125.811   6
  -2  -1  12 2994.20 123.311  21
  -2  -1  12 2959.37 125.512   6
  -2   1  11 844.758 72.8109   6
  -2  -1  11 820.950 70.8507   6
  -2  -1  11 818.459 67.5335  21
  -2  -1  10 277.006 44.4551   6
  -2   1  10 278.598 45.6007   6
  -2  -1  10 260.709 43.2161  21
  -2  -1   9 210.997 39.2067  21
  -2   1   9 282.298 42.9772   6
  -2  -1   9 211.745 40.5229   6
  -2  -1   9 130.457 50.5749  15
   2   1  -8 442.549 70.4909  13
  -2  -1   8 411.708 70.1571  15
   2   1  -7 8470.25 283.712  13
  -2  -1   7 8339.55 284.638  15
  -2  -1   6 919.892 89.7702  15
   2   1  -6 823.863 85.1220  13
   2   1  -5 491.472 64.3382  13
  -2  -1   4 3672.46 148.874  12
  -2   1   3 6159.46 167.507  12
  -2  -1   3 6001.54 181.648  12
   2  -1  -3 5813.78 171.123   3
   2   1  -3 5615.22 170.050   3
   2   1  -2 6249.11 169.938   3
   2   1  -2 6531.23 170.462  16
  -2   1   2 6266.36 161.638  12
  -2  -1   2 6566.76 180.739  12
   2  -1  -2 5948.75 163.991   3
  -2   1   2 5840.90 166.650  14
  -2  -1   2 6001.68 170.914  14
   2  -1  -1 977.557 62.0470   3
   2   1  -1 987.396 65.1040   3
  -2  -1   1 866.866 61.2675  14
  -2   1   1 891.193 60.9034  14
   2  -1   0 13504.5 253.970   3
   2  -1   1 1554.19 85.1765   9
   2   1   1 1391.21 77.2208   1
   2  -1   1 1391.97 74.3154   1
   2   1   2 4035.64 137.732   1
   2  -1   2 3898.86 130.331   1
   2  -1   2 3898.71 143.581   9
   2  -1   3 3392.20 124.829  10
   2  -1   3 3423.61 140.912   9
   2   1   4 5604.46 186.725  10
   2  -1   4 5327.78 172.011  10
   2  -1   4 5381.86 192.166   9
   2  -1   5 2205.64 118.296  10
   2   1   5 1975.22 118.370  10
   2  -1   5 2027.97 125.130   9
   2  -1   6 3640.45 178.781   9
   2   1   6 3493.08 170.748  10
   2   1   7 2158.81 146.491  10
   2  -1   7 2253.29 142.844   8
   2   1   8 1087.88 110.956   8
   2  -1   8 996.376 103.343   8
   2  -1   9 2087.20 100.276  21
   2   1   9 2168.34 164.993   8
  -2   1  -9 2118.17 100.771  30
   2  -1   9 2018.47 100.324   6
   2   1   9 2057.77 102.641   6
   2   1  10 27.0033 29.5867   6
   2  -1  10 74.3885 34.6668   6
  -2   1 -11 1542.69 97.9769  23
   2   1  11 1569.89 94.3473   6
   2  -1  11 1686.17 95.5738   6
  -2   1 -12 1536.30 96.2307  23
   2  -1  12 1310.51 84.7317   6
   2   1  12 1598.58 93.0806   6
   2  -1  13 118.376 31.2587   6
   2   1  13 213.839 39.3796   6
  -2   1 -13 123.960 35.3430  23
   2  -1  14 163.434 31.3459   6
   2   1  14 155.213 32.6454   6
  -2   1 -14 162.095 31.7499  23
  -2   1 -15 14.4438 14.0415   5
  -2  -1 -15 44.2301 17.5207   5
  -2  -2  15 317.663 29.0115  21
  -2  -2  14 866.529 56.6132  21
  -2  -2  13 313.509 43.0735  21
  -2  -2  12 279.822 44.5687  21
  -2  -2  11 365.579 49.8593  21
  -2  -2  10 718.298 64.3077  21
  -2  -2   9 2871.61 122.335  21
  -2   2   9 2863.23 136.321  26
  -2  -2   9 2763.32 191.986  15
   2   2  -8 1599.87 141.614  13
  -2  -2   8 1607.57 86.5223  21
  -2   2   8 1546.37 95.0570  26
  -2  -2   8 1733.07 143.279  15
   2   2  -7 1874.28 142.051  13
  -2  -2   7 2172.97 153.045  15
   2   2  -6 910.869 95.8172  13
  -2  -2   6 1002.75 98.7411  15
   2   2  -5 6958.15 240.637  13
  -2  -2   5 6284.51 225.422  15
   2   2  -4 3658.62 166.638  13
   2   2  -3 5018.94 171.393  16
  -2  -2   3 4798.93 173.250  12
  -2  -2   2 16930.4 336.359  12
   2   2  -2 17272.5 343.372  16
  -2  -2   1 194.129 37.1197  12
   2   2  -1 217.210 36.0617   3
   2   2  -1 166.573 39.5914  16
   2   2   0 235.747 35.9412   7
   2  -2   1 287.147 45.3716   9
   2   2   1 320.266 41.5188   7
   2   2   1 211.478 35.9943   1
   2  -2   2 4450.43 167.257   9
   2   2   2 4405.35 146.775   7
   2   2   2 4046.68 141.211   1
   2  -2   3 506.194 61.6331   9
   2   2   3 750.657 65.4530   7
   2   2   4 840.749 76.4555  10
   2  -2   4 773.319 78.9190   9
   2   2   4 722.570 67.9586   7
   2   2   5 4120.39 182.011  10
   2  -2   5 4370.06 193.355   9
   2   2   6 7600.20 266.559  10
   2  -2   6 8062.98 283.826   9
   2   2   7 3030.67 175.334  10
   2  -2   8 522.826 53.6917  21
  -2   2  -8 507.958 52.7798  30
   2  -2   9 3592.59 135.805  21
   2   2   9 3465.43 211.472   8
  -2   2  -9 3323.60 132.269  30
   2   2  10 1530.67 89.9088   6
  -2   2 -10 1441.13 95.1768  23
  -2   2 -10 1379.02 87.6717  30
  -2   2 -11 119.724 37.3733  30
  -2   2 -11 94.9483 36.2116  23
   2   2  11 96.8120 38.4088   6
   2   2  12 1247.07 81.9644   6
  -2   2 -12 1301.95 81.2964  30
  -2   2 -12 1346.55 87.8759  23
  -2   2 -13 60.1894 28.4920  23
   2   2  13 52.7546 26.2163   6
  -2   2 -13 17.0234 24.4216  30
  -2   2 -14 30.8996 23.8729  23
   2   2  14 64.3546 23.5581   6
  -2   2 -15 194.368 26.0196  23
  -2  -3  14 425.424 38.1013  21
  -2  -3  13 400.549 44.7368  21
  -2  -3  12 264.609 43.0372  21
  -2  -3  11 39.3953 29.4523  21
  -2  -3  10 750.092 66.3593  21
  -2   3  10 749.913 73.5919  26
  -2   3   9 796.913 76.0937  26
  -2  -3   9 745.506 65.8739  21
   2   3  -9 717.081 65.4845  28
  -2  -3   8 11.1467 27.6969  15
  -2   3   8 42.4337 27.9582  26
  -2  -3   8 82.7658 28.4711  21
   2   3  -7 995.018 111.106  13
  -2  -3   7 898.824 65.0770  21
  -2   3   7 777.547 69.4646  26
  -2   3   7 936.335 65.0685  20
  -2  -3   7 855.636 101.795  15
   2   3  -6 418.055 70.0341  13
  -2  -3   6 522.626 75.6261  15
   2   3  -5 2378.88 151.209  13
   2   3  -4 5803.08 217.793  16
   2   3  -4 5808.96 226.184  13
   2   3  -3 4736.14 192.322  13
   2   3  -3 4626.17 188.349  16
   2   3  -2 952.721 84.0648  16
   2   3  -2 735.855 72.4190  13
   2   3  -2 766.287 72.4894   7
   2   3  -1 2872.54 143.704  16
   2   3  -1 2776.18 134.311   7
   2   3   0 1660.95 108.093  16
   2   3   0 1678.93 101.890   7
   2   3   1 4905.10 175.275   7
   2   3   1 4853.03 185.306  16
   2  -3   2 297.379 51.1635   9
   2   3   2 394.182 55.9786  16
   2   3   2 346.609 51.3377   7
   2  -3   3 4626.11 193.471   9
   2   3   3 4772.02 186.930   7
   2   3   3 4572.67 182.574  16
   2  -3   4 4282.97 195.195   9
   2   3   4 4176.43 183.231   7
   2   3   5 1323.36 108.441   7
   2  -3   5 1350.23 114.776   9
   2  -3   6 487.213 75.8322   9
  -2   3  -7 233.366 40.2064  23
  -2   3  -7 370.699 45.4766  31
  -2   3  -7 304.241 43.4380  30
  -2   3  -8 168.022 36.8793  23
  -2   3  -8 139.918 37.5218  30
  -2   3  -9 800.896 70.9403  23
  -2   3  -9 957.630 74.6008  30
  -2   3 -10 1708.32 101.036  23
  -2   3 -10 1545.81 93.8924  30
  -2   3 -11 123.411 35.3987  23
  -2   3 -11 122.556 36.6290  30
  -2   3 -12 991.569 74.4241  23
  -2   3 -12 1006.50 71.3139  30
  -2   3 -13 167.485 32.2731  23
  -2   3 -13 119.015 30.5021  30
  -2   3 -14 91.2541 22.2837  23
  -2   3 -14 89.9131 21.2374  30
  -2  -4  14 101.866 18.2284  21
   2   4 -14 128.027 19.2969  30
  -2  -4  13 573.590 43.9205  21
  -2  -4  12 844.966 60.4167  21
  -2  -4  11 439.374 49.1600  21
   2   4 -11 323.580 45.4122  28
  -2  -4  10 1366.71 85.2983  21
   2   4 -10 1270.01 83.7490  28
  -2   4  10 1512.65 99.7913  26
  -2   4   9 188.424 41.7929  26
  -2   4   9 160.728 37.4348  20
   2   4  -9 144.518 37.8617  28
  -2   4   8 15653.2 314.460  20
  -2   4   8 15543.3 345.982  26
   2   4  -8 16022.8 326.936  28
  -2   4   7 1778.66 96.1861  20
   2   4  -7 1708.40 96.1988  18
  -2   4   7 1899.62 110.046  26
  -2   4   6 974.982 73.5857  20
   2   4  -6 1094.86 79.8821  18
  -2   4   5 2441.34 106.769  20
  -2   4   5 2516.95 117.466  29
   2   4  -5 2315.97 110.063  18
   2   4  -3 3320.77 179.561   7
   2   4  -3 3464.12 185.778  16
   2   4  -2 57477.6 925.295  16
   2   4  -2 59409.3 916.261   7
   2   4  -1 9373.73 301.420  16
   2   4  -1 9424.99 292.471   7
   2   4   0 37332.4 654.373   7
   2   4   0 36230.4 665.624  16
   2   4   1 5734.15 229.198  16
   2   4   1 5644.29 222.479   7
   2   4   2 10856.3 322.099  16
   2   4   2 10451.8 318.843   7
   2   4   3 521.105 74.2750   7
   2   4   4 151.114 46.8719   7
  -2   4  -5 8883.04 220.778  31
   2   4   5 8633.71 314.399   7
  -2   4  -6 7942.65 212.269  31
  -2   4  -7 361.424 47.8324  31
  -2   4  -8 2040.88 108.825  31
  -2   4  -8 2359.12 113.335  30
  -2   4  -9 71.1138 30.9135  30
  -2   4 -10 3856.29 144.278  30
  -2   4 -11 227.249 39.7894  30
  -2   4 -11 176.853 36.9698  23
  -2   4 -12 1033.05 66.9370  23
  -2   4 -12 986.395 65.7388  30
  -2   4 -13 219.570 30.8127  23
  -2   4 -13 271.247 32.9978  30
   2   5 -13 11.0178 13.8259  30
   2   5 -12 396.383 36.6219  28
   2   5 -11 263.575 38.0096  28
   2   5 -10 351.226 45.9036  28
  -2   5  10 303.734 47.2514  26
  -2   5  10 239.373 38.8921  20
  -2   5   9 64.8517 29.9408  20
   2   5  -9 128.438 33.6263  28
  -2   5   9 68.8509 31.3339  26
  -2   5   8 1410.37 88.0839  20
   2   5  -8 1323.12 88.3498  18
   2   5  -8 1321.94 88.6827  28
  -2   5   8 1494.79 101.285  26
   2   5  -8 1372.49 84.2529  24
  -2   5   7 89.3943 34.8291  20
   2   5  -7 39.4535 28.3041  18
   2   5  -7 56.6072 28.7155  28
  -2   5   7 97.0852 36.1798  26
   2   5  -7 82.8221 33.3867  24
  -2   5   6 256.020 45.2822  20
   2   5  -6 223.541 43.1174  18
   2   5  -6 272.105 44.6893  28
   2   5  -6 232.033 42.1960  24
   2   5  -5 12.9305 25.8631  24
  -2   5   5 17.0796 28.0669  20
   2   5  -5-14.6192 26.6167  18
   2   5  -5-22.0656 27.9531  28
  -2   5   5 37.3018 30.5745  29
   2   5  -4 136.380 35.7106  18
  -2   5   4 134.153 34.0181  20
  -2  -5   4 118.615 48.9236  17
  -2   5   4 92.9799 35.5505  29
   2   5  -4 113.112 32.3780  24
   2   5  -4 33.8451 42.8280   7
   2   5  -3 2328.99 110.647  18
  -2   5   3 2101.56 112.764  29
  -2  -5   3 2036.25 159.346  17
   2   5  -3 2419.52 172.429   7
   2   5  -3 2457.28 108.749  24
   2   5  -2 807.830 63.7860  24
  -2   5   2 779.623 69.0134  29
   2   5  -2 738.331 63.0486  18
   2   5  -2 759.611 96.2956   7
  -2   5   1-18.9532 24.5055  29
   2   5  -1 29.9378 28.6284   7
   2   5  -1 15.4442 22.1532  24
   2   5  -1 10.4781 30.0593  16
   2   5   0 293.392 40.9682  24
  -2   5   0 219.949 40.3453  29
   2   5   0 156.132 53.3522   7
   2   5   0 265.481 61.3155  16
   2   5   1 87.4677 28.3555  24
  -2   5  -1 135.627 35.8214  29
   2   5   1 99.9833 44.2105  16
   2   5   1 19.8022 33.3161   7
   2   5   2 95.5628 28.2401  24
  -2   5  -2 118.378 37.2127  29
   2   5   2 50.9509 41.3524   7
   2   5   3 568.458 52.6441  24
  -2   5  -3 691.748 61.4138  31
  -2   5  -4 155.669 36.8882  31
   2   5   4 133.143 47.7673   7
  -2   5  -5 9.53523 25.1269  31
  -2   5  -6 493.445 58.2073  31
  -2   5  -7 439.377 55.7531  31
  -2   5  -8 507.693 56.8404  31
   2   5   9 145.081 34.2487  20
  -2   5  -9 175.758 35.6250  31
   2   5  10 444.453 47.1291  20
  -2   5 -10 423.507 46.7339  30
  -2   5 -11 2299.35 92.3757  30
  -2   5 -12 107.606 23.2463  30
   2   6 -11 444.052 34.1179  30
   2   6 -10 5.79457 20.1462  28
  -2   6   9 584.704 51.9871  20
   2   6  -9 676.971 56.7733  28
  -2   6   8 169.086 35.3898  20
   2   6  -8 186.202 37.3088  28
  -2   6   8 201.510 39.8746  26
  -2   6   7 62.8481 32.7520  26
  -2   6   7 85.8502 31.0356  20
   2   6  -7 89.8897 30.4602  24
   2   6  -7 59.5820 26.3043  18
   2   6  -7 33.8831 27.1767  28
  -2   6   6 654.659 61.0295  20
   2   6  -6 736.439 65.0611  24
   2   6  -6 660.661 65.8830  18
   2   6  -6 617.661 60.2080  28
   2   6  -5 188.948 38.8005  18
  -2   6   5 226.696 41.8948  20
  -2   6   5 279.119 50.9233  29
   2   6  -5 214.344 42.5446  24
  -2   6   4 778.989 75.0221  29
   2   6  -4 886.712 74.3189  18
   2   6  -4 865.969 71.8038  24
   2   6  -3 287.120 46.3084  24
  -2   6   3 458.247 58.5651  29
   2   6  -3 333.935 51.3637  18
  -2   6   2 367.234 54.0526  29
   2   6  -2 451.884 54.8160  24
  -2   6   1 892.544 79.1368  29
   2   6  -1 876.953 69.9602  24
   2   6   0 21.5275 25.4638  24
  -2   6   0 10.8225 27.4426  29
   2   6   1 938.572 71.6509  24
  -2   6  -1 937.553 79.1802  29
   2   6   2 163.160 35.7850  24
  -2   6  -2 129.229 40.5293  29
  -2   6  -3 2428.15 117.388  31
  -2   6  -3 2672.57 130.712  29
  -2   6  -4 239.732 42.7573  31
  -2   6  -4 315.712 52.6888  29
  -2   6  -5 173.655 40.3750  31
  -2   6  -5 136.950 41.7548  29
  -2   6  -6 66.1820 33.5695  31
  -2   6  -7 102.956 35.1813  31
   2   6   7 91.2299 31.4361  20
   2   6   8 356.624 45.0534  20
  -2   6  -8 387.928 48.4620  31
   2   6   9 1740.87 82.1878  20
  -2   6  -9 1495.27 80.3015  31
   2   6  10 194.809 29.2093  20
   2   6  11 98.8894 19.0647  20
  -2   7   9 162.554 26.4097  26
   2   7  -8 65.4230 21.9690  28
  -2   7   8 103.300 27.4054  26
  -2   7   7 73.1693 28.1757  26
  -2   7   6 17.4147 24.5866  26
   2   7  -6 13.8344 23.5326  24
   2   7  -5 540.889 53.6069  24
  -2   7   4 374.677 52.3892  29
   2   7  -4 439.796 49.0581  24
   2   7  -3 77.6033 29.8840  24
  -2   7   3 85.9647 35.1711  29
   2   7  -2 53.7360 29.6588  24
  -2   7   2 160.431 42.0014  29
   2   7  -1 53.4636 27.6765  24
  -2   7   1 83.6729 35.5872  29
   2   7   0 864.483 66.0193  24
  -2   7   0 695.773 69.4183  29
  -2   7  -1 10.3895 27.8804  29
  -2   7  -2 194.233 42.4793  29
  -2   7  -3 34.7688 29.3774  29
  -2   7  -4 159.547 35.9704  31
  -2   7  -4 166.307 40.9261  29
  -2   7  -5 752.039 62.8927  31
  -2   7  -5 742.881 66.2664  29
   2   7   6 53.1440 23.3056  20
  -2   7  -6 70.1089 28.7520  31
  -2   7  -6 36.4332 25.3156  29
  -2   7  -7-9.83969 21.0402  31
   2   7   7 14.2065 21.3726  20
  -2   7  -7 38.9226 23.8064  29
  -2   7  -8 144.900 27.3392  31
   2   7   8 116.793 25.9136  20
  -2   7  -8 116.767 27.0034  29
   2   7   9 68.9772 19.0526  20
  -2   7  -9 71.9559 18.6626  31
  -2   7  -9 59.0214 19.7178  29
   2   8  -6 42.3598 17.1273  31
  -2   8   6 82.6234 20.4823  26
  -2   8   5 328.673 37.8059  26
   2   8  -4 402.732 39.7496  24
   2   8  -3 952.235 57.8022  24
  -2   8   2 630.110 56.3244  29
   2   8  -2 618.452 48.2798  24
  -2   8   1 204.206 37.0485  29
   2   8  -1 217.227 32.4411  24
  -2   8   0 72.5594 30.5077  29
  -2   8  -1 475.233 50.6824  29
  -2   8  -2 313.307 42.8869  29
  -2   8  -3 1116.45 70.3043  29
  -2   8  -4 1318.57 71.4818  29
  -2   8  -5 1869.78 73.2734  31
  -2   8  -5 1927.70 80.2627  29
  -2   8  -6 31.8050 16.2584  31
  -2   8  -6 41.0551 17.3151  29
  -2   8  -6 30.2648 16.2644  27
  -3   0  15 67.4838 16.4726   6
  -3   0  14 31.3032 19.4452   6
  -3   0  13 1156.04 71.7871   6
  -3   0  12-16.5787 25.5713   6
  -3   0  11 862.715 72.7399   6
  -3   0  10-4.63742 27.4264   6
  -3   0   9 5231.38 173.946   6
   3   0  -8-10.8635 33.0556   3
   3   0  -7 3484.64 196.445   3
  -3   0   7 3987.94 205.397  15
   3   0  -6 25.8142 32.6557   3
  -3   0   6 8.35685 22.4260  15
  -3   0   5 1528.72 119.147  12
   3   0  -5 1588.54 118.439   3
  -3   0   4 26.1579 30.3955  12
   3   0  -4 6.86275 31.8981   3
  -3   0   3 29029.0 514.256  12
   3   0  -3 28080.0 519.512   3
  -3   0   2 5.69712 26.4801  14
   3   0  -2 11.6240 31.1931   3
  -3   0   1 1021.09 83.2646  14
   3   0  -1 1162.29 87.5542   3
   3   0   1 5531.53 187.197   9
   3   0   1 5551.35 193.113   1
   3   0   2 5.56432 25.2394   9
   3   0   2-5.83426 24.3984   1
   3   0   3 2827.27 144.368   9
   3   0   3 4044.13 178.249   1
   3   0   4-13.4423 22.6095  10
   3   0   4 20.1540 28.9087   9
   3   0   5 12045.3 337.330  10
   3   0   6 8.65672 26.3408  10
   3   0   7 2863.14 180.988  10
   3   0   8-12.7505 28.9180   6
   3   0   9 412.537 56.4635   6
   3   0  10-4.66096 26.3214   6
   3   0  11 2447.48 115.956   6
   3   0  12-4.12653 26.1379   6
  -3   0 -13 110.111 30.4453   5
  -3   0 -14 10.1888 16.5430   5
  -3   1  14 644.443 46.2256   6
  -3  -1  14 690.632 47.5763   6
  -3  -1  13 657.873 55.0877   6
  -3  -1  13 721.875 54.1654  21
  -3   1  13 801.291 60.2585   6
  -3   1  12 478.770 53.1068   6
  -3  -1  12 466.211 50.5164   6
  -3  -1  12 415.034 48.3115  21
  -3  -1  11 296.366 44.5305  21
  -3   1  11 353.474 50.2026   6
  -3  -1  11 304.758 47.5135   6
  -3  -1  10 17.6099 27.8862  21
  -3   1  10 4.55415 29.5772   6
  -3  -1  10 27.3383 29.5917   6
  -3   1   9 689.079 65.5403   6
  -3  -1   9 690.100 67.4747   6
  -3  -1   9 671.756 65.1087  21
   3  -1  -8-10.8255 32.9409   3
   3   1  -8 21.7702 34.9137   3
  -3  -1   8 57.4910 28.8577  21
  -3  -1   8 33.5836 30.0416  15
   3   1  -7 1486.74 133.935  13
  -3  -1   7 1702.78 88.6658  21
   3  -1  -7 1618.78 135.023   3
   3   1  -7 1576.85 133.404   3
  -3  -1   7 1463.51 132.456  15
   3   1  -6 2158.54 150.323  13
  -3  -1   6 2004.62 143.785  15
   3   1  -6 1680.74 130.827   3
   3  -1  -6 1868.00 136.527   3
   3  -1  -5 2149.69 137.960   3
   3   1  -5 2243.73 140.613   3
  -3  -1   5 2337.47 146.768  12
   3  -1  -4 740.118 80.5264   3
   3   1  -4 803.405 85.6691   3
  -3  -1   4 777.910 84.1439  12
   3  -1  -3 2845.97 143.635   3
   3   1  -3 2660.53 142.274   3
  -3  -1   3 2368.37 135.095  12
  -3  -1   2 717.932 76.4149  12
   3  -1  -2 633.060 66.4753   3
   3   1  -2 670.247 69.2764   3
  -3   1   2 716.156 70.9345  14
  -3  -1   2 711.641 71.3239  14
  -3   1   1 354.911 51.5989  14
  -3  -1   1 355.116 52.0296  14
   3  -1  -1 416.011 54.3918   3
   3   1  -1 442.307 59.2552   3
  -3   1   0 73.4542 30.5830  14
  -3  -1   0 109.048 34.1021  14
   3  -1   1 1229.55 96.3960   9
   3   1   1 985.041 82.8823   1
   3  -1   1 1144.10 85.8684   1
   3   1   2 132.334 38.5980   1
   3  -1   2 82.7194 39.2686   9
   3  -1   2 80.8506 31.0093   1
   3  -1   3 15209.1 366.459   9
   3   1   3 15122.9 356.102   1
   3  -1   3 15032.5 354.010   1
   3   1   4 4789.91 200.537  10
   3  -1   4 4540.49 202.506   9
   3   1   5 1001.55 98.8291  10
   3  -1   5 827.055 93.1783   9
   3   1   6 1508.79 128.502  10
   3  -1   6 1546.35 133.497   9
   3   1   7 908.194 106.615  10
   3  -1   7 829.478 64.2771   6
   3  -1   7 861.114 105.287   9
  -3   1  -7 922.063 69.8573  23
  -3   1  -7 862.100 65.8706  30
   3   1   7 1052.75 71.5856   6
  -3   1  -8 73.7435 30.6676  23
   3  -1   8 141.519 35.3330   6
   3   1   8 77.2868 30.4983   6
  -3   1  -8 83.7660 32.0849  30
   3  -1   9 5552.28 173.144   6
  -3   1  -9 5342.59 178.158  23
  -3   1  -9 5713.47 174.980  30
   3   1   9 5528.30 175.571   6
  -3   1 -10 202.151 41.6241  23
   3  -1  10 292.241 44.9899   6
   3   1  10 311.541 48.3987   6
  -3   1 -10 272.199 41.8556  30
  -3   1 -11 557.124 60.1358  23
   3  -1  11 658.286 61.9680   6
   3   1  11 673.627 63.2584   6
  -3   1 -12 641.817 60.7642  23
   3  -1  12 690.991 59.3604   6
   3   1  12 489.333 54.1235   6
  -3   1 -13 223.312 35.0697  23
  -3   1 -13 238.238 34.7730   5
  -3  -1 -13 216.921 36.0519   5
  -3   1 -14 15.8897 16.4441   5
  -3  -1 -14 41.4250 19.3050   5
  -3  -2  14 144.833 23.6934  21
  -3  -2  13 1086.83 64.5786  21
  -3  -2  12 52.2979 26.7963  21
  -3  -2  11 515.855 57.5942  21
  -3  -2  10 1353.38 89.1535  21
  -3  -2   9 12009.6 270.458  21
   3   2  -8 2461.06 183.704  13
  -3  -2   8 2572.25 117.632  21
  -3  -2   8 2411.64 184.539  15
  -3  -2   7 1323.95 81.3803  21
   3   2  -7 1200.29 127.565  13
   3   2  -6 997.448 109.540  13
  -3  -2   6 957.636 105.943  15
   3   2  -5 3447.60 190.832  13
   3   2  -4 894.931 96.3425  13
  -3  -2   4 802.725 87.8418  12
  -3  -2   3 8760.83 279.227  12
   3   2  -3 9117.79 271.422   3
   3   2  -2 6566.12 221.715   3
   3   2  -2 6604.68 225.713  16
   3   2  -1 12964.0 329.467  16
  -3  -2   0 11467.8 291.117  14
   3  -2   0 11180.2 307.920   9
   3   2   0 10517.3 282.258   1
   3  -2   1 2685.15 148.178   9
   3   2   1 3392.89 154.686   1
   3  -2   2 3694.95 177.394   9
   3   2   2 3411.36 159.252   1
   3  -2   3 21420.0 484.030   9
   3   2   4 499.945 74.2543  10
   3  -2   4 584.284 80.7600   9
   3   2   5 683.344 85.1484  10
   3  -2   5 578.445 84.9143   9
   3   2   6 1028.30 109.337  10
   3  -2   6 858.437 103.524   9
  -3   2  -7 2805.75 121.875  23
   3   2   7 2829.70 189.102  10
   3  -2   7 2696.03 189.432   9
  -3   2  -7 2819.03 121.233  31
  -3   2  -7 2724.86 116.735  30
  -3   2  -8 2672.59 124.634  23
  -3   2  -8 2559.37 117.781  30
   3   2   8 2568.60 114.120   6
  -3   2  -9 14573.2 316.410  23
  -3   2  -9 14315.5 306.330  30
   3   2   9 15051.7 306.169   6
  -3   2 -10 1023.09 80.4413  23
  -3   2 -10 1080.09 79.0658  30
   3   2  10 1151.04 79.9180   6
  -3   2 -11 3337.39 137.340  23
  -3   2 -11 3403.21 132.167  30
   3   2  11 3166.84 127.050   6
  -3   2 -12 20.4266 24.5155  23
  -3  -2 -12 36.2510 24.6665   5
  -3   2 -13 4517.70 135.633  23
  -3  -2 -13 4316.30 125.406   5
  -3   2 -14 239.715 29.1968  23
  -3  -3  14 4.91458 12.2101  21
  -3  -3  13 674.165 48.2267  21
  -3  -3  12 243.889 36.7335  21
  -3  -3  11 122.561 35.2085  21
  -3  -3  10 681.543 63.0974  21
  -3  -3   9 3038.95 128.465  21
  -3   3   9 2486.27 129.571  26
  -3  -3   8 137.114 38.6153  21
  -3  -3   7 231.776 63.3520  15
   3   3  -7 264.990 71.2839  13
  -3  -3   7 278.989 44.4266  21
   3   3  -6 89.4962 46.7930  13
  -3  -3   6 118.752 33.1211  21
  -3   3   6 116.429 35.7448  20
   3   3  -6 61.0880 28.3541  18
  -3  -3   6 117.436 51.9393  15
   3   3  -5 2306.64 164.375  13
  -3   3   5 1964.63 96.0441  20
   3   3  -5 2141.05 102.106  18
   3   3  -4 1115.40 111.121  13
   3   3  -3 783.618 90.6680  13
   3   3  -3 447.870 68.0566  16
   3   3  -2 123.413 42.5686  16
   3  -3  -1 1649.47 125.629   9
   3   3  -1 1734.71 126.887  16
   3  -3   0 2046.40 137.916   9
   3   3   0 2336.37 147.253  16
   3  -3   1 758.883 85.9349   9
   3   3   1 481.115 72.1285  16
   3  -3   2 233.879 54.9294   9
   3   3   2 297.602 59.1825  16
   3  -3   3 505.595 75.3254   9
   3   3   3 466.556 72.6959  16
   3   3   4 501.254 73.9262  10
   3  -3   4 470.118 76.0858   9
   3   3   4 545.732 77.3477  16
   3   3   5 524.645 80.2498  10
   3  -3   5 629.437 94.2102   9
  -3   3  -5 553.502 55.9889  31
  -3   3  -6 907.594 69.9134  23
   3  -3   6 1129.33 123.834   9
  -3   3  -6 1077.33 77.3396  31
  -3   3  -6 1042.21 72.3057  30
  -3   3  -7 382.897 50.0108  23
  -3   3  -7 348.703 49.1220  31
  -3   3  -7 290.590 45.8394  30
  -3   3  -8 608.865 62.8753  23
  -3   3  -8 439.557 55.5586  30
  -3   3  -8 446.564 55.1990  31
  -3   3  -9 412.729 55.8528  23
  -3   3  -9 370.007 53.5730  30
  -3   3 -10 66.1415 31.7889  23
  -3   3 -10 30.6335 32.6209  30
  -3   3 -11 1105.60 76.8757  23
  -3   3 -11 1076.97 72.7923  30
  -3   3 -12 181.929 33.9892  23
  -3   3 -13 56.5589 22.5332  23
  -3   3 -14 6.72730 12.5353  23
  -3  -4  13 174.348 22.6433  21
  -3  -4  12 22.9526 19.1846  21
  -3  -4  11 174.448 32.8163  21
   3   4 -11 190.611 33.0477  28
  -3  -4  10 363.466 44.9272  21
   3   4 -10 298.238 43.1878  28
  -3  -4   9 500.736 56.1520  21
   3   4  -9 572.548 62.1538  28
  -3   4   8 38.2921 29.8812  26
   3   4  -7 1637.41 100.494  18
  -3   4   7 1756.77 109.224  26
  -3   4   6 70.5134 33.4528  20
   3   4  -6 24.1966 27.3319  18
  -3   4   5 1781.32 97.6270  20
   3   4  -5 2014.15 107.721  18
  -3  -4   4 247.498 39.7491  22
  -3   4   4 212.439 38.7090  20
   3   4  -4 192.282 36.3300  18
  -3  -4   3 983.520 68.8675  22
   3   4  -3 1026.63 73.3524  18
   3   4  -3 841.603 103.170  16
  -3  -4   2 922.284 65.6760  22
   3   4  -2 796.770 64.9149  18
   3   4  -2 700.309 94.7241  16
   3   4  -2 893.936 65.2814  24
   3   4  -1 231.579 62.9950  16
   3   4   0 331.061 66.0254  16
   3   4   1 1884.50 147.186  16
   3   4   2 1861.75 145.826  16
  -3   4  -3 440.933 49.8643  31
  -3   4  -4 17.8180 26.3451  31
  -3   4  -5 262.031 45.8417  31
  -3   4  -6 590.451 61.7865  31
  -3   4  -7 4877.59 171.193  31
  -3   4  -8 195.223 41.0231  31
  -3   4  -8 186.208 38.8371  30
  -3   4  -9 3594.99 139.610  31
  -3   4  -9 3377.71 131.147  30
  -3   4 -10 123.241 32.5448  23
  -3   4 -10 199.059 39.4344  30
  -3   4 -11-3.37943 22.2138  23
  -3   4 -11 22.8854 24.1408  30
  -3   4 -12 279.690 33.1242  23
  -3   4 -13 17.0048 13.2490  23
   3   5 -12 35.1148 14.3933  28
   3   5 -11 40.3264 20.9285  28
   3   5 -10 1114.30 69.0986  28
   3   5  -9 85.4197 30.7688  28
  -3   5   9 81.4897 31.4907  26
   3   5  -8 34.8820 26.9015  18
   3   5  -8 4.29340 25.0164  28
  -3   5   8 25.1525 25.5122  26
   3   5  -7 152.582 37.1738  18
   3   5  -7 113.281 33.8015  28
  -3   5   7 160.115 37.5303  26
   3   5  -6 532.595 59.1167  18
  -3   5   6 541.203 62.9574  26
   3   5  -5 55.6598 29.1397  24
   3   5  -5 90.5276 32.2697  18
   3   5  -4 3908.51 152.010  18
  -3   5   4 3623.42 150.222  29
   3   5  -4 3813.37 140.643  24
   3   5  -3 244.504 44.2405  24
   3   5  -3 314.133 48.6026  18
   3   5  -2 567.170 58.2541  18
   3   5  -2 649.957 61.7822  24
   3   5  -1 8.52639 24.0751  24
   3   5  -1-12.0940 38.7902  16
   3   5   0 1339.48 139.538  16
   3   5   0 1430.98 86.0085  24
   3   5   1 4.28132 26.7685  24
   3   5   1 11.7974 37.8389  16
   3   5   2 86.2649 30.3215  24
   3   5   3 899.957 70.8452  24
  -3   5  -4 765.412 69.7915  31
  -3   5  -5 58.3664 31.2060  31
  -3   5  -6 165.177 40.3663  31
  -3   5  -7 4.69795 27.7844  31
  -3   5  -8 239.208 41.9166  31
  -3   5  -9 513.188 50.8227  31
   3   5  10 1348.37 68.6671  20
  -3   5 -10 1339.90 72.3242  31
   3   6 -10 59.6266 18.8389  28
   3   6  -9 767.849 53.0124  28
  -3   6   9 673.848 54.4262  26
   3   6  -8 88.7594 25.6277  28
  -3   6   8 97.9116 30.0046  26
   3   6  -7 15.9974 21.8453  18
   3   6  -7 14.6304 22.8696  28
  -3   6   7 26.7434 26.7463  26
   3   6  -7 26.9403 23.6647  24
   3   6  -6 285.657 44.6591  18
   3   6  -6 267.757 41.1841  28
  -3   6   6 281.475 46.2569  26
   3   6  -6 275.276 41.6380  24
   3   6  -5 949.809 74.7509  18
   3   6  -5 947.404 69.8946  24
   3   6  -4 4794.81 166.401  18
   3   6  -4 4983.60 163.192  24
   3   6  -3 714.474 68.8989  18
   3   6  -3 791.284 68.5918  24
  -3   6   2 11562.3 284.256  29
   3   6  -2 11731.9 264.216  24
  -3   6   1 4377.64 166.434  29
   3   6  -1 4261.96 151.737  24
   3   6   0 411.864 52.5025  24
  -3   6   0 307.911 49.1683  27
   3   6   1 1029.70 78.1074  24
   3   6   2 2226.66 110.961  24
   3   6   3 4063.18 145.447  24
  -3   6  -4 9833.12 241.982  31
   3   6   4 10097.5 235.221  24
   3   6   5 146.712 33.2584  24
  -3   6  -5 140.392 36.9909  31
  -3   6  -6 234.964 40.4400  31
  -3   6  -7 331.077 43.2537  31
   3   6   8 132.370 28.8238  20
  -3   6  -8 167.558 32.4575  31
   3   6   9 379.312 36.7939  20
  -3   6  -9 317.932 36.2068  31
   3   6  10 10.8113 14.1568  20
  -3   7   8 86.3224 20.2362  26
  -3   7   7 81.0950 22.5783  26
  -3   7   6 119.689 28.8293  26
   3   7  -6 89.2452 24.7077  24
  -3   7   5 134.230 32.3334  26
   3   7  -5 107.936 28.8622  24
   3   7  -4 1141.83 70.9660  24
   3   7  -3 872.139 63.9557  24
   3   7  -2 364.644 45.9395  24
  -3   7   2 477.039 54.1570  29
  -3   7   1 711.393 64.6586  29
   3   7  -1 742.561 60.5191  24
  -3   7   0 417.128 52.2987  29
   3   7   0 495.065 50.6699  24
   3   7   1 172.534 34.9887  24
  -3   7  -1 187.521 40.3499  29
  -3   7  -1 284.301 43.2538  27
  -3   7  -2 1063.13 75.4029  27
   3   7   2 1151.41 71.9569  24
   3   7   3 179.344 33.7255  24
  -3   7  -3 148.840 35.1366  27
  -3   7  -4 179.197 36.3204  27
  -3   7  -5 419.948 45.6890  27
  -3   7  -5 435.453 44.1462  31
  -3   7  -6 403.921 41.3326  27
   3   7   6 394.578 37.3066  20
  -3   7  -6 329.425 37.7397  31
  -3   7  -7 30.8028 16.8286  27
   3   7   7 57.5211 20.3898  20
  -3   7  -7 51.1243 18.9716  31
   3   7   8 71.4023 16.9972  20
  -3   7  -8 70.8226 18.4316  31
  -3   8   5 13.2700 12.0083  26
  -3   8   4 218.957 28.5925  26
   3   8  -4 191.945 24.6005  24
  -3   8   3-2.55718 14.6720  26
   3   8  -2 334.455 33.5480  24
   3   8  -1 92.1554 21.5633  24
  -3   8   0 22.1427 18.6241  29
   3   8   0 36.5158 17.3249  24
   3   8   1 8.70618 16.3720  24
  -3   8  -1-2.69357 17.9149  29
  -3   8  -2 528.492 42.1725  29
  -3   8  -2 550.822 41.6003  27
  -3   8  -3-2.28775 15.3918  27
  -3   8  -4 328.224 32.4641  27
  -3   8  -5 10.3484 13.2077  27
  -4   0  14 61.4390 16.2763   6
  -4   0  13 4.94511 18.4288   6
  -4   0  12 217.172 36.4710   6
  -4   0  11 15.8260 26.3151   6
  -4   0  10 11297.0 260.323   6
  -4   0   9 9.23999 26.5077   6
  -4   0   7 4.15134 24.5516  21
   4   0  -6 1649.63 148.000   3
  -4   0   5 29.2609 31.2838  12
   4   0  -5-10.4299 31.7361   3
  -4   0   4 6266.13 260.217  12
   4   0  -4 6221.86 266.006   3
  -4   0   3 34.3147 39.8768  12
   4   0  -3 73.4671 40.6040   3
  -4   0   2 26541.0 557.858  12
  -4   0   2 26730.6 562.176  14
  -4   0   1 8.21271 31.1677  14
  -4   0   0 2429.11 152.011  14
   4   0   0 2418.72 154.396   1
  -4   0  -1-8.17674 32.1202  14
   4   0   1 8.40423 29.5285   1
   4   0   2 9813.33 320.807   1
   4   0   3 27.2970 31.9706   1
   4   0   4 626.945 85.9325  10
  -4   0  -5-8.43902 21.8223  23
  -4   0  -5 4.08869 23.4591   5
  -4   0  -6 8668.07 221.103   5
  -4   0  -7 4.55186 24.4299   5
  -4   0  -8 2850.20 128.659   5
  -4   0  -9-23.2682 29.0972   5
  -4   0 -10 3921.16 147.489   5
  -4   0 -11-11.7589 25.1439   5
  -4   0 -12 3479.34 117.761   5
  -4   0 -13 9.48803 16.1392   5
  -4   1  13 129.544 24.8667   6
  -4  -1  13 153.676 25.6288   6
  -4  -1  12 270.513 34.6317  21
  -4   1  12 235.410 35.2235   6
  -4  -1  12 293.458 39.5093   6
  -4  -1  11 137.520 33.0756  21
  -4   1  11 203.875 37.3595   6
  -4  -1  11 159.773 35.6102   6
  -4   1  10 1279.17 83.8576   6
  -4  -1  10 1323.38 84.9420   6
  -4   1   9 1366.51 88.1097   6
  -4  -1   9 1359.78 88.1116   6
  -4  -1   9 1284.43 84.7507  21
  -4  -1   8 40.1960 27.5574  21
  -4  -1   7 140.043 37.6900  21
   4   1  -6 266.372 67.5465  13
   4  -1  -6 356.973 72.5112   3
   4   1  -6 294.466 66.0579   3
   4   1  -5 945.521 111.707  13
  -4  -1   5 889.782 110.211  12
   4  -1  -5 1045.28 112.454   3
   4   1  -5 836.217 103.942   3
  -4  -1   4 29.4225 34.4693  12
   4  -1  -4 116.568 45.1581   3
   4   1  -4 158.746 48.2686   3
  -4  -1   3 1039.85 107.462  12
   4  -1  -3 1203.11 113.820   3
   4   1  -3 1307.56 121.134   3
  -4   1   2 777.837 94.1535  14
  -4  -1   2 743.576 91.7777  14
  -4   1   1 553.762 74.5678  14
  -4  -1   1 628.749 79.0699  14
  -4   1   0 272.999 55.8819  14
  -4  -1   0 248.352 55.1101  14
   4   1   0 264.440 56.7842   1
   4  -1   0 184.981 52.9086   9
   4  -1   0 223.040 56.8754   1
  -4   1  -1 80.8110 36.6567  14
  -4  -1  -1 8.36733 34.9930  14
   4  -1   1 8.30722 26.6463   1
   4  -1   1 115.791 54.2055   9
   4   1   1 42.9565 41.7914   1
   4   1   2 4261.77 208.368   1
   4  -1   2 3920.31 196.072   1
   4  -1   2 4111.71 211.559   9
   4  -1   3 3156.72 187.217   9
  -4   1  -4 755.673 62.6626  23
   4   1   4 627.918 91.3009  10
   4  -1   4 794.579 98.4790   9
  -4  -1  -4 830.531 63.6116   5
  -4   1  -5 938.909 72.0671  23
   4   1   5 759.484 101.597  10
   4  -1   5 1008.43 117.690   9
  -4   1  -5 936.637 69.1251   5
  -4  -1  -5 872.171 68.0682   5
  -4   1  -6 154.435 36.4818  23
   4   1   6 81.0570 45.5052  10
  -4   1  -6 139.619 34.8856   5
  -4  -1  -6 126.840 32.9245   5
   4  -1   6 117.950 52.1623   9
  -4   1  -7 204.440 41.6527  23
  -4   1  -7 286.971 44.6037   5
  -4  -1  -7 160.253 37.2105   5
  -4   1  -8 1297.14 88.5637  23
  -4   1  -8 1070.36 76.9335   5
  -4  -1  -8 1076.89 79.6988   5
  -4   1  -9 2448.70 119.408  23
  -4  -1  -9 2696.47 122.955   5
  -4   1  -9 2612.73 119.217   5
  -4   1 -10 213.010 40.4159  23
  -4   1 -10 274.858 43.1500   5
  -4  -1 -10 282.845 43.7651   5
  -4   1 -11 549.679 54.1969  23
  -4   1 -11 500.947 50.6954   5
  -4  -1 -11 475.676 51.4238   5
  -4   1 -12 101.131 26.2684  23
  -4   1 -12 152.993 28.8060   5
  -4  -1 -12 134.244 28.8760   5
  -4   1 -13 66.5316 18.9915   5
  -4  -1 -13 72.6762 20.7432   5
  -4  -2  13 376.206 32.2627  21
  -4  -2  12 210.804 31.8145  21
  -4  -2  11 109.548 30.4327  21
  -4  -2  10 1747.89 94.4767  21
  -4  -2   9 8.82493 27.9491  21
  -4  -2   8 49.9819 30.9196  21
  -4  -2   7 2014.32 107.403  21
   4   2  -6 457.167 86.0210  13
  -4  -2   6 401.102 49.0271  21
  -4  -2   6 475.380 86.6462  15
   4   2  -5-11.8243 33.9216  13
   4   2  -5 49.0307 25.5748  18
  -4  -2   4 4484.44 238.551  12
  -4  -2   4 4123.39 142.373  22
  -4  -2   3 1626.94 137.249  12
  -4  -2   3 1427.86 80.4445  22
  -4   2   3 1375.63 83.8112  19
   4   2  -3 1503.85 86.6385  18
  -4  -2   2 256.087 56.9696  12
  -4  -2   1 991.551 108.541  12
   4   2  -1 796.209 105.019   1
   4   2  -1 716.583 90.7775  16
   4   2   0 577.627 81.0607   1
   4  -2   0 534.289 84.1445   9
   4   2   1 5161.79 228.905   1
   4  -2   1 4842.50 236.922   9
   4  -2   2 1450.23 132.737   9
   4   2   2 1260.44 115.361   1
  -4   2  -3 710.324 61.7382  23
   4  -2   3 530.404 83.1397   9
  -4   2  -4 1328.68 85.1143  23
   4   2   4 1252.85 123.537  10
   4  -2   4 999.704 117.153   9
  -4   2  -4 1147.21 79.2701  31
  -4   2  -5 269.668 45.3137  23
   4   2   5 297.796 66.7904  10
   4  -2   5 256.938 66.8834   9
  -4   2  -6 165.080 38.4972  23
  -4   2  -7 5993.04 193.253  23
  -4  -2  -7 5993.95 183.812   5
  -4   2  -8 1158.90 86.1038  23
  -4  -2  -8 1203.29 81.6299   5
  -4   2  -9-43.6238 29.9047  23
  -4  -2  -9 21.6024 23.1885   5
  -4   2 -10 146.762 35.8273  23
  -4  -2 -10 118.780 34.5703   5
  -4   2 -11 806.021 63.3895  23
  -4  -2 -11 875.930 61.2618   5
  -4   2 -12 72.2632 23.8593  23
  -4  -2 -12 50.1031 21.2375   5
  -4   2 -13 49.6509 17.5626  23
  -4  -3  12 98.8148 22.4070  21
  -4  -3  11 727.702 54.1107  21
  -4  -3  10 232.094 37.8081  21
  -4  -3   9 304.214 48.0010  21
  -4  -3   8 17.4266 27.2399  21
  -4  -3   7 1307.36 85.3283  21
  -4  -3   6-4.37410 23.4758  21
   4   3  -6 9.68277 24.0562  18
  -4  -3   5 1151.62 78.2900  21
   4   3  -5 1028.67 78.6640  18
   4   3  -4 1274.20 136.344  13
  -4  -3   4 1257.15 81.8010  22
   4   3  -4 1259.92 84.6953  18
   4   3  -3 340.551 73.8212  13
  -4  -3   3 426.314 49.4013  22
  -4   3   3 373.705 49.2836  19
   4   3  -3 367.700 48.1467  18
  -4  -3   2 243.869 39.6076  22
   4  -3  -2 224.116 63.3227   9
  -4   3   2 238.462 44.6717  19
   4   3  -2 226.336 38.2631  18
  -4   3   2 216.438 40.6338  27
  -4  -3   1 95.6450 28.0153  22
   4  -3  -1 88.5831 47.6550   9
  -4   3   1 64.3147 31.6117  19
   4   3  -1 85.4393 27.7553  18
  -4   3   1 71.6138 30.4635  27
   4   3  -1 63.4013 38.6510  16
  -4  -3   0 245.485 38.7976  22
   4  -3   0 287.560 67.3468   9
  -4   3   0 199.254 38.2237  27
   4   3   0 247.652 61.8227  16
   4  -3   1 530.106 90.2265   9
  -4   3  -1 517.701 55.8099  27
   4   3   1 527.667 84.3401  16
   4  -3   2 221.389 61.4686   9
  -4   3  -2 323.769 45.8040  27
   4   3   2 225.335 61.5978  16
   4  -3   3 1109.49 125.755   9
  -4   3  -3 1024.54 73.2979  31
  -4   3  -3 1014.61 76.6580  27
   4   3   3 1013.94 117.893  16
  -4   3  -4 1168.41 80.4628  23
  -4   3  -4 1359.92 87.6288  31
   4   3   4 1338.83 136.012  16
  -4   3  -5 1070.90 80.1165  23
  -4   3  -5 1156.50 81.0977  31
  -4   3  -6 271.430 43.7931  23
  -4   3  -6 321.767 48.0307  31
  -4   3  -7 1250.03 87.0098  23
  -4   3  -7 1322.04 88.1477  31
  -4   3  -8 4.77169 25.1482  23
  -4   3  -9 3549.25 138.602  23
  -4   3 -10 95.1445 29.8349  23
  -4   3 -11 127.853 29.5811  23
  -4   3 -12 24.5720 18.1456  23
  -4  -4  11 94.5642 22.1614  21
   4   4 -11 97.4624 21.8302  28
  -4  -4  10 394.875 41.6727  21
   4   4 -10 485.551 45.4834  28
  -4  -4   9 132.142 31.5291  21
   4   4  -9 156.275 34.2040  28
   4   4  -8 175.365 38.1542  18
   4   4  -7 101.794 31.8455  18
   4   4  -6 850.997 73.0581  18
   4   4  -5 1085.87 83.1689  18
   4   4  -4 2459.15 121.167  18
  -4  -4   3 2648.55 121.876  22
   4   4  -3 2719.04 127.202  18
  -4  -4   2 1850.85 106.607  22
  -4   4   2 1506.28 102.547  19
  -4  -4   1 1807.67 97.0220  22
  -4   4   1 1921.31 104.788  27
   4   4   0 131.645 35.4557  24
  -4  -4   0 257.692 40.4410  22
  -4   4   0 196.855 41.2046  27
   4   4   1 188.805 42.1691  24
  -4   4  -1 114.901 40.5791  27
  -4  -4  -2 17893.1 338.683  22
  -4   4  -2 18154.1 363.425  27
  -4   4  -3 4252.85 161.328  27
  -4   4  -4 3662.35 145.439  31
  -4   4  -4 3550.85 145.102  27
  -4   4  -5 95.9310 36.4187  31
  -4   4  -6 622.041 63.2077  31
  -4   4  -7 1223.96 83.3736  31
  -4   4  -9 1464.45 79.9952  23
  -4   4 -10 2276.24 91.8113  23
  -4   4 -11 140.535 24.7689  23
   4   5 -10 46.8151 17.9529  28
   4   5  -9 359.811 39.6475  28
   4   5  -8 13.9531 19.6993  18
   4   5  -8 10.3139 21.2111  28
   4   5  -7 28.4261 24.0206  18
   4   5  -7 65.4065 27.8717  28
   4   5  -6 1550.50 93.6024  18
   4   5  -5 113.159 35.8045  18
   4   5  -4 255.509 43.5348  18
   4   5  -3 736.332 66.7949  18
  -4  -5   2 3108.87 128.362  22
  -4   5   2 3369.48 141.622  19
   4   5  -2 3161.72 133.758  18
   4   5  -2 3059.66 125.983  24
   4   5  -1 270.231 44.1984  24
  -4  -5   1 234.578 42.0777  22
  -4   5   1 125.203 36.9284  27
   4   5   0 8.69087 27.8753  24
  -4  -5   0 4.27500 23.3503  22
  -4   5   0 29.8922 31.1497  27
  -4   5  -1 1583.12 98.9966  27
   4   5   1 1853.88 99.1755  24
  -4   5  -2 1411.82 96.5121  27
   4   5   2 1624.28 94.6518  24
   4   5   3 214.679 40.5198  24
  -4   5  -3 130.928 38.9351  27
   4   5   4 383.270 49.9130  24
  -4   5  -4 357.002 48.2625  31
  -4   5  -4 272.857 47.5192  27
  -4   5  -5 1078.93 75.5569  31
  -4   5  -5 925.576 74.3750  27
   4   5   5 856.605 69.3012  24
  -4   5  -6 452.441 52.9084  31
   4   5   6 488.605 51.9036  24
   4   5   7 14.1832 22.1710  24
  -4   5  -7 39.1688 26.0523  31
   4   5   8 6.12707 18.9007  24
   4   5   9 162.588 26.2554  24
   4   5  10 56.2788 17.6676  20
   4   6  -9 9.96237 11.9087  28
   4   6  -8 51.0535 19.3738  28
   4   6  -7 289.360 35.1550  18
   4   6  -7 251.589 33.1155  28
   4   6  -6 13.6848 20.2340  18
   4   6  -5 138.965 32.7989  18
   4   6  -4 23.8619 23.4499  24
   4   6  -4-3.95457 20.4523  18
   4   6  -3 385.881 46.6494  18
   4   6  -3 403.158 46.4466  24
   4   6  -2 26.7331 25.9859  24
  -4   6   2 33.5230 28.1940  19
   4   6  -1 11.7581 23.5184  24
  -4   6   1 13.3209 26.6442  19
   4   6   0 107.210 31.2159  24
  -4   6   0 117.154 33.8225  27
   4   6   1 130.869 32.9533  24
  -4   6  -1 151.326 36.7005  27
   4   6   2 292.559 41.3989  24
  -4   6  -2 262.340 43.3455  27
   4   6   3 271.256 40.7204  24
  -4   6  -3 307.144 44.4056  27
   4   6   4 142.508 32.1440  24
  -4   6  -4 118.352 33.3977  27
   4   6   5 317.297 39.7926  24
  -4   6  -5 302.506 39.1391  31
  -4   6  -5 303.646 41.4272  27
   4   6   6 280.477 36.1603  24
  -4   6  -6 318.093 38.3342  31
  -4   6  -6 298.905 37.1733  27
   4   6   7 442.318 38.3110  24
   4   6   8 457.390 35.9024  20
   4   6   9 207.605 21.6380  20
   4   7  -4 296.591 33.1012  24
   4   7  -3 496.802 42.0914  24
   4   7  -2 151.581 28.8191  24
   4   7  -1 22.9917 19.9853  24
  -4   7   1 24.5049 21.7490  19
   4   7   0-2.90380 19.9756  24
  -4   7   0-9.69976 20.2156  19
   4   7   1 71.4163 24.0708  24
  -4   7  -1 16.3461 20.9749  19
  -4   7  -1 36.6515 22.5562  27
   4   7   2 300.941 35.8616  24
  -4   7  -2 251.159 37.0136  19
  -4   7  -2 293.152 35.9628  27
   4   7   3 68.6339 23.0671  24
  -4   7  -3 47.3482 24.2048  19
  -4   7  -3 46.7919 24.8231  27
   4   7   4 206.428 27.4987  24
  -4   7  -4 190.413 29.6543  19
  -4   7  -4 248.127 32.2026  27
  -4   7  -5 262.162 29.6424  27
   4   7   5 278.188 28.5954  24
  -4   7  -6 246.874 25.8521  27
  -5   0  12 11.7693 15.2824   6
  -5   0  11 310.091 36.6328   6
  -5   0  10 23.9350 23.2658   6
  -5   0   9 249.549 41.2429   6
  -5   0   8-35.5045 27.4333  21
  -5   0   7 1740.61 98.1671  21
  -5   0   5 1047.40 81.5516  19
  -5   0   4-5.00724 28.2771  19
  -5   0   4-14.8469 29.2692  25
  -5   0   3 673.881 66.0547  19
  -5   0   3 664.591 62.6919   5
  -5   0   3 672.227 65.9935  25
  -5   0   2 11.1635 37.5533  12
  -5   0   2-9.96972 29.4812  19
  -5   0   2 9.90868 27.0606  25
  -5   0   2 4.33231 23.6631   5
  -5   0   1 3712.60 223.436  12
  -5   0   1 3867.08 153.477  19
  -5   0   1 4110.10 148.920   5
  -5   0   1 4079.30 155.311  25
   5   0  -1 4024.98 236.085   1
  -5   0   0 33.8382 45.7613  14
  -5   0   0-12.9032 27.5905   5
   5   0   0 23.0303 33.0344   1
  -5   0   0-9.65385 27.6948  19
  -5   0   0 14.5008 24.5128  25
   5   0   1 5517.65 274.470   1
  -5   0  -1 5758.20 176.223   5
  -5   0  -1 5839.97 184.772  25
  -5   0  -1 6067.44 281.506  14
  -5   0  -2-34.4758 38.6587  14
  -5   0  -2-8.81038 26.8090   5
  -5   0  -3 141.543 38.8906  23
  -5   0  -3 71.7691 35.8382   5
  -5   0  -4 14.2942 26.0249  23
  -5   0  -4-9.13873 27.8073   5
  -5   0  -5 1444.89 92.5628  23
  -5   0  -5 1458.54 90.3902   5
  -5   0  -6 13.9060 27.8145   5
  -5   0  -7 8994.34 230.321   5
  -5   0  -8 21.4570 28.5428   5
  -5   0  -9 7.77290 23.3207   5
  -5   0 -10-13.2921 21.0487   5
  -5   0 -11 283.577 34.4281   5
  -5   0 -12 9.11935 13.8436   5
  -5   1  12 545.323 36.7083   6
  -5  -1  12 635.723 39.0965   6
  -5  -1  11 77.1047 22.4068  21
  -5   1  11 25.2732 20.9908   6
  -5  -1  11 87.9137 24.0439   6
  -5   1  10 571.104 50.8236   6
  -5  -1  10 523.376 48.5125   6
  -5  -1  10 583.350 48.9230  21
  -5   1   9 597.827 55.8608   6
  -5  -1   9 604.858 56.5978   6
  -5  -1   9 639.962 56.4853  21
  -5  -1   8 329.828 46.6803  21
  -5  -1   7 21.9182 28.1210  21
  -5  -1   6 216.348 45.5372  21
   5   1  -5 979.836 75.2669  18
  -5   1   4 1113.27 82.8027  19
   5   1  -4 1075.25 79.5227  18
  -5   1   4 1028.38 79.5008  25
  -5  -1   3 208.209 43.4442  19
  -5   1   3 171.358 42.1980  19
  -5  -1   3 185.210 39.0403   5
  -5  -1   3 207.440 42.6713  25
  -5   1   3 207.835 42.0373  25
  -5  -1   2 58.8030 43.0182  12
  -5  -1   2 115.404 37.7532  19
  -5   1   2 120.765 36.8145  19
  -5   1   2 84.7797 31.6077   5
  -5  -1   2 95.1542 33.3215  25
  -5  -1   2 95.7283 31.5311   5
  -5   1   2 74.5572 32.2937  25
  -5   1   1 44.8413 40.9974  14
  -5  -1   1-11.4889 34.9602  14
   5  -1  -1 79.7871 44.7760   1
  -5  -1   1 23.6211 39.7315  12
  -5  -1   1 54.1436 31.5763  19
  -5   1   1 29.8884 29.4626  19
  -5  -1   1 59.0895 31.5890  25
  -5   1   1 24.8080 26.6311  25
  -5   1   1 42.0454 27.3083   5
  -5  -1   1 38.8753 25.9211   5
  -5   1   0 126.297 33.3773   5
  -5   1   0 166.430 53.9875  14
  -5  -1   0 182.704 55.5616  14
  -5  -1   0 164.628 36.7891   5
   5  -1   0 107.099 55.3268   9
  -5  -1   0 144.040 38.3693  19
   5  -1   0 169.834 56.2752   1
  -5   1   0 103.274 34.5844  19
  -5  -1   0 120.717 33.2447  25
  -5   1  -1 133.533 50.4828  14
  -5  -1  -1 68.9217 40.3695  14
  -5   1  -1 105.902 30.0889   5
  -5  -1  -1 61.2106 26.2504   5
  -5   1  -1 111.080 34.6488  19
  -5   1  -2 146.602 51.1656  14
  -5  -1  -2 221.144 63.5838  14
  -5   1  -2 94.3478 32.2797   5
  -5  -1  -2 102.044 31.8412   5
  -5   1  -3 146.824 37.8242  23
  -5   1  -3 100.205 32.4951   5
  -5  -1  -3 130.846 36.9155   5
  -5   1  -4 153.778 40.9146  23
  -5   1  -4 172.653 42.6356   5
  -5  -1  -4 224.735 45.1374   5
  -5   1  -5 459.519 59.7205  23
  -5   1  -5 500.001 56.0465   5
  -5  -1  -5 542.127 58.5337   5
  -5   1  -6 1089.37 81.3800  23
  -5   1  -6 1055.78 75.5138   5
  -5  -1  -6 1095.01 79.1451   5
  -5   1  -7 340.239 49.4205  23
  -5   1  -7 280.239 44.4824   5
  -5  -1  -7 296.798 46.3883   5
  -5   1  -8 765.901 66.7392  23
  -5   1  -8 707.503 61.4356   5
  -5  -1  -8 846.652 68.0464   5
  -5   1  -9 897.599 67.3825  23
  -5   1  -9 936.970 66.4000   5
  -5  -1  -9 986.875 69.3319   5
  -5   1 -10 103.361 27.5057  23
  -5   1 -10 167.042 30.3679   5
  -5  -1 -10 135.893 30.2847   5
  -5   1 -11 22.8162 17.8156  23
  -5   1 -11 20.9803 16.2108   5
  -5  -1 -11 17.7374 18.1743   5
  -5  -1 -12 13.8311 13.6964   5
  -5  -2  11 1459.85 64.6843  21
  -5  -2  10 902.793 58.9381  21
  -5  -2   9 1183.04 73.9918  21
  -5  -2   8 60.0310 28.4204  21
  -5  -2   7 146.272 37.3101  21
  -5  -2   6 731.642 66.4941  21
   5   2  -6 838.314 71.1244  18
  -5  -2   5 835.060 72.3961  21
   5   2  -5 777.063 69.7742  18
  -5   2   4 6753.87 205.207  19
   5   2  -4 7209.35 209.034  18
   5   2  -3 998.212 77.8952  18
  -5   2   3 849.798 76.1454  25
  -5   2   2 322.568 54.6076  19
   5   2  -2 321.307 49.7785  18
  -5   2   1 1972.17 111.275  19
   5   2  -1 1823.02 103.404  18
  -5  -2   0 594.032 58.0349  22
  -5   2   0 468.134 58.6174  19
   5   2   0 494.588 55.4302  18
  -5  -2  -1 11591.3 257.748  22
  -5   2  -1 11372.6 273.674  19
  -5  -2  -1 11126.8 256.716   5
  -5   2  -2 6543.39 199.728  19
  -5  -2  -2 6554.37 189.051   5
  -5   2  -3 4363.39 161.223  23
  -5  -2  -3 4182.73 149.514   5
  -5   2  -4 1684.05 106.511  23
  -5  -2  -4 1494.75 97.7572   5
  -5   2  -5 2620.68 124.646  23
  -5  -2  -5 2566.00 117.803   5
  -5   2  -6-4.91607 28.2066  23
  -5  -2  -6 39.1865 29.9523   5
  -5   2  -7 240.101 43.8464  23
  -5  -2  -7 299.834 43.1582   5
  -5   2  -8 213.042 39.2224  23
  -5  -2  -8 107.504 30.1995   5
  -5   2  -9 1726.17 90.0984  23
  -5  -2  -9 1819.85 86.7873   5
  -5   2 -10 72.7354 25.8678  23
  -5  -2 -10 58.0809 22.7987   5
  -5   2 -11 285.151 31.1954  23
  -5  -2 -11 313.227 30.1664   5
  -5  -3  11 24.7706 14.9089  21
  -5  -3  10-4.92384 17.1189  21
  -5  -3   9 85.3831 26.2579  21
  -5  -3   8 134.048 32.4268  21
  -5  -3   7 135.947 35.0381  21
   5   3  -7 115.596 32.4587  18
  -5  -3   6 2126.43 104.377  21
   5   3  -6 2333.91 113.232  18
  -5  -3   5 135.242 39.9836  21
   5   3  -5-19.3319 28.1606  18
   5   3  -4 316.660 48.4980  18
  -5  -3   3 2239.80 110.884  22
  -5   3   3 2579.80 125.664  19
   5   3  -3 2493.23 121.718  18
  -5  -3   2 591.617 58.8622  22
  -5   3   2 566.979 61.9140  19
   5   3  -2 609.884 61.5804  18
  -5   3   1 265.950 52.1910  19
   5   3  -1 211.139 44.1905  18
  -5  -3   0 1526.61 91.5827  22
  -5   3   0 1519.08 101.179  19
  -5  -3  -1 6054.47 183.109  22
  -5   3  -1 5905.96 194.098  19
  -5  -3  -2 430.163 51.7785  22
  -5   3  -2 338.374 52.8947  19
  -5   3  -2 461.285 55.0451  27
  -5   3  -3 118.795 39.1555  23
  -5   3  -3-9.89662 33.2929  27
  -5   3  -4 817.334 70.6452  23
  -5   3  -5 1509.67 93.5427  23
  -5   3  -6 153.845 40.5613  23
  -5   3  -7 750.104 64.1891  23
  -5   3  -8 381.748 45.8070  23
  -5   3  -9 1156.10 68.3428  23
  -5   3 -10 12.9175 15.9396  23
  -5   3 -11 64.7061 15.9058  23
   5   4 -10 6.78803 13.2211  28
   5   4  -9 2.43857 16.7752  28
   5   4  -8 23.8445 17.6291  18
   5   4  -7 253.159 36.7678  18
   5   4  -6 299.060 43.2838  18
   5   4  -5 124.111 31.4946  18
   5   4  -4 1135.21 79.4451  18
  -5  -4   3 78.6065 33.7413  22
  -5   4   3 75.0145 33.2957  19
   5   4  -3 75.3790 30.6061  18
  -5  -4   2 17.7619 23.8324  22
  -5   4   2 24.6079 28.6760  19
   5   4  -2 4.68833 22.8057  18
  -5  -4   1 48.7484 28.0719  22
  -5   4   1 25.2912 31.2082  19
   5   4  -1 13.7032 23.1661  18
  -5  -4   0 613.547 59.8637  22
  -5   4   0 591.298 66.2797  19
  -5  -4  -1 341.504 45.6307  22
  -5   4  -1 308.567 49.8594  19
  -5   4  -1 378.871 51.9227  27
  -5  -4  -2-12.9719 24.4183  22
  -5   4  -2 4.91711 27.3164  19
  -5   4  -2-4.92615 27.3667  27
  -5  -4  -3 913.660 70.2437  22
  -5   4  -3 807.444 69.2135  19
  -5   4  -3 844.371 72.2869  27
   5   4   3 915.120 67.7424  24
   5   4   4 306.478 45.0498  24
  -5  -4  -4 388.155 48.4173  22
  -5  -4  -5 197.341 35.5932  22
  -5  -4  -6 278.237 38.8975  22
  -5  -4  -7 104.544 27.2848  22
  -5   4  -8 2.82836 18.8119  23
  -5  -4  -8 21.3687 16.4800  22
   5   4   9 76.5724 20.9497  24
  -5   4  -9 78.7295 18.9672  23
  -5  -4  -9 76.8781 18.5086  22
   5   4  10 310.405 26.8542  24
   5   5  -8 319.100 31.1426  18
   5   5  -8 363.600 33.3463  28
   5   5  -7 203.918 29.2501  18
   5   5  -7 189.745 28.9094  28
   5   5  -6 32.2215 20.4103  18
   5   5  -6 8.80724 19.0671  28
   5   5  -5 14.3770 20.6228  18
   5   5  -4 160.976 36.7089  18
   5   5  -3 134.015 32.7510  18
  -5   5   2 159.960 36.2705  19
   5   5  -2 192.592 36.1421  18
  -5  -5   1 27.1087 24.8438  22
  -5   5   1 26.4863 27.6016  19
  -5  -5   0 439.300 48.7370  22
  -5   5   0 539.304 58.7465  19
   5   5   1-3.61040 22.2745  24
  -5  -5  -1-3.78110 19.9275  22
  -5   5  -1 4.46614 29.3568  19
  -5   5  -1 4.35805 26.1504  27
   5   5   2 151.316 33.1246  24
  -5  -5  -2 164.827 33.6757  22
  -5   5  -2 120.710 34.7392  19
  -5   5  -2 175.918 37.7189  27
   5   5   3 144.524 32.0070  24
  -5  -5  -3 135.962 28.9748  22
  -5   5  -3 125.615 33.1628  19
  -5   5  -3 139.597 32.8183  27
  -5  -5  -4 2017.80 89.6045  22
  -5   5  -4 2019.26 96.4350  27
   5   5   4 1842.57 87.4825  24
   5   5   5 169.318 30.8818  24
  -5   5  -5 177.589 31.9278  27
   5   5   6 14.0351 19.7256  24
   5   5   7 726.220 47.1000  24
   5   5   8 390.754 31.3763  24
   5   6  -6-1.94757 12.3361  18
   5   6  -5 6.93846 13.2701  18
   5   6  -4-2.54749 14.1523  18
  -5   6   2 186.825 31.7433  19
  -5   6   1 135.211 32.1868  19
   5   6   0 19.1129 19.7774  24
  -5   6   0-6.67211 22.1882  19
  -5   6  -1 600.916 53.0651  19
   5   6   1 633.460 47.9672  24
   5   6   2 164.705 29.6790  24
  -5   6  -2 209.881 34.1832  19
   5   6   3 28.2469 19.3181  24
  -5   6  -3 32.0403 19.5989  19
   5   6   4 70.7017 20.4291  24
  -5   6  -4 32.4942 18.6365  19
   5   6   5 136.152 22.9604  24
   5   6   6 488.605 33.1599  24
  -5   7   0 8.63525 12.3866  19
  -5   7  -1 10.4933 13.0354  19
  -6   0  10 42.8048 16.1856   6
  -6   0   9-9.76503 20.4186   6
  -6   0   8 9.02146 22.2049   6
  -6   0   7-3.17179 20.3464  21
  -6   0   6 3425.07 123.711  21
   6   0  -4 1650.93 93.1301  18
  -6   0   3-4.97748 27.1870  19
  -6   0   3 9.87219 26.4920  25
  -6   0   2 1505.78 100.043  19
  -6   0   2 1339.72 92.6586  25
  -6   0   1 35.4568 32.0841  19
  -6   0   1-22.2791 30.3173   5
  -6   0   1 45.7026 33.3794  25
  -6   0   0 12788.0 292.373  19
  -6   0   0 12694.7 285.627   5
  -6   0   0 12548.4 292.371  25
  -6   0  -1-14.6444 28.0077  25
  -6   0  -1 26.8359 32.3968   5
  -6   0  -2 15810.4 317.703   5
  -6   0  -3-17.5194 25.9036   5
  -6   0  -4 493.413 56.2992   5
  -6   0  -5 4.05543 23.2683   5
  -6   0  -6 90.3292 36.6263   5
  -6   0  -7-16.8702 25.1483   5
  -6   0  -8 1021.80 60.7112   5
  -6   0  -9 4.61533 16.5505   5
  -6   0 -10 42.3579 14.1243   5
  -6  -1  10 26.0351 14.1034   6
  -6   1   9 362.866 32.9854   6
  -6  -1   9 354.151 34.7105   6
  -6  -1   9 385.540 34.2553  21
  -6  -1   8 80.7788 23.4851  21
  -6   1   8 94.1643 25.7610   6
  -6  -1   8 97.6791 25.4187   6
  -6  -1   7 325.038 40.9124  21
  -6  -1   6 1591.61 85.0168  21
  -6  -1   5 682.884 59.7721  21
  -6   1   5 833.491 67.7723  19
   6   1  -5 717.372 61.3882  18
  -6   1   4 1049.07 78.8703  19
   6   1  -4 1017.06 74.7577  18
  -6   1   4 993.797 76.0262  25
  -6   1   3 778.555 70.2013  19
   6   1  -3 699.459 64.5008  18
  -6   1   3 569.201 59.6927  25
  -6   1   2 206.506 43.0883  19
   6   1  -2 181.315 37.2224  18
  -6   1   2 194.563 41.4620  25
  -6   1   1 800.411 74.2043  19
  -6   1   1 833.869 67.4924   5
  -6  -1   1 806.666 68.1557   5
  -6   1   1 874.818 75.3047  25
  -6   1   0 3141.87 138.675  19
  -6   1   0 3352.03 134.809   5
  -6  -1   0 3565.42 138.545   5
  -6   1   0 3268.44 140.451  25
  -6   1  -1 747.708 68.3044  19
  -6   1  -1 743.976 64.6949   5
  -6  -1  -1 839.625 69.9956   5
  -6   1  -1 734.649 69.1699  25
  -6   1  -2 66.2490 29.2155  25
  -6   1  -2 160.046 36.7642   5
  -6  -1  -2 132.006 36.5476   5
  -6   1  -3 669.740 61.7018   5
  -6  -1  -3 671.110 63.0763   5
  -6   1  -4 732.259 63.4712   5
  -6  -1  -4 818.172 66.9170   5
  -6   1  -5 68.2054 30.5148   5
  -6  -1  -5 91.6249 34.2939   5
  -6   1  -6 212.607 35.9265   5
  -6  -1  -6 165.983 35.3438   5
  -6   1  -7 917.729 59.9218   5
  -6  -1  -7 1043.68 65.3876   5
  -6   1  -8 44.0360 20.3534   5
  -6  -1  -8 16.8079 20.8813   5
  -6   1  -9 101.864 20.5789   5
  -6  -1  -9 75.5301 20.5463   5
  -6  -1 -10 98.5344 17.4863   5
  -6  -2   9 83.7272 18.7692  21
  -6  -2   8 17.9449 19.2839  21
  -6  -2   7 438.679 43.6960  21
  -6  -2   6 37.7715 28.2941  21
   6   2  -6-10.7321 20.2022  18
  -6  -2   5 182.566 37.6261  21
   6   2  -5 112.367 30.2186  18
  -6  -2   4 208.271 37.0115  21
  -6   2   4 156.091 36.3152  19
   6   2  -4 250.495 38.9819  18
  -6   2   4 167.071 35.2420  25
  -6   2   3 255.974 44.3170  19
   6   2  -3 180.066 37.4147  18
  -6   2   3 122.257 36.2053  25
  -6   2   2 392.622 53.5159  19
   6   2  -2 310.881 46.0327  18
  -6   2   2 347.203 48.1220  25
  -6   2   1 314.735 51.9156  19
   6   2  -1 305.213 44.4108  18
  -6  -2   1 261.088 41.8877   5
  -6   2   1 287.595 48.7780  25
  -6   2   0 1940.80 107.445  19
  -6  -2   0 1958.82 99.1207   5
   6   2   0 1789.47 97.6013  18
  -6   2   0 1938.82 107.027  25
  -6  -2  -1 3.91057 24.1265  22
  -6   2  -1-9.51175 26.4207  19
  -6   2  -1 28.9391 28.9415  25
  -6  -2  -1 8.17012 27.7945   5
  -6  -2  -2 206.230 36.6235  22
  -6  -2  -2 145.749 35.1095   5
  -6  -2  -3-3.95741 26.3210   5
  -6  -2  -3-15.2859 22.9310  22
  -6  -2  -4-3.80512 20.4221   5
  -6  -2  -4 14.7738 23.0928  22
  -6  -2  -5 977.073 64.4755  22
  -6  -2  -5 1020.12 66.6604   5
  -6  -2  -6 1286.16 71.5734   5
  -6  -2  -7 756.807 52.8428   5
  -6  -2  -8 11.6546 18.6159   5
  -6  -2  -9 1.72767 12.1405   5
  -6  -2  -9 7.17847 10.7687  22
  -6  -3   8 199.995 25.3234  21
  -6  -3   7 68.5372 21.6677  21
   6   3  -7 149.613 25.3869  18
  -6  -3   6 19.8080 20.0906  21
   6   3  -6-12.6161 19.9779  18
  -6  -3   5 171.785 32.1901  21
   6   3  -5 147.440 32.2520  18
  -6  -3   4 86.5277 32.2036  21
  -6   3   4 41.5971 27.9271  19
   6   3  -4 31.3049 25.4182  18
  -6   3   3 216.542 40.8081  19
   6   3  -3 261.916 41.3754  18
  -6   3   3 274.530 40.6326  25
  -6  -3   2 3.71829 21.9905  22
  -6   3   2 8.81504 26.4473  19
   6   3  -2 12.4890 21.1119  18
  -6   3   2-25.6511 26.7300  25
  -6  -3   1 327.062 42.6959  22
  -6   3   1 231.032 43.4350  19
   6   3  -1 316.715 42.6356  18
  -6   3   1 240.435 43.1698  25
  -6  -3   0 115.009 29.1135  22
  -6   3   0 113.180 34.3752  19
  -6   3   0 63.2570 30.4141  25
  -6  -3  -1 60.9748 25.9328  22
  -6   3  -1 22.0938 25.3566  19
  -6   3  -1 49.2207 29.4157  25
  -6  -3  -2 228.190 36.6428  22
  -6   3  -2 167.636 37.1091  19
  -6  -3  -3 564.751 51.9843  22
  -6   3  -3 589.950 55.7376  25
  -6  -3  -4 1472.13 78.7299  22
  -6  -3  -5 3.17229 19.5716  22
  -6  -3  -6 215.229 31.1430  22
  -6  -3  -7 2.41178 15.4710  22
   6   3   8-1.72692 13.3395  24
  -6  -3  -8-1.90979 12.7020  22
   6   4  -7 9.37059 11.7188  18
   6   4  -7 26.3999 14.3135  28
   6   4  -6 92.5842 21.8443  18
   6   4  -5 145.745 26.7622  18
   6   4  -4 829.758 58.1872  18
  -6   4   3 57.0069 26.1292  19
   6   4  -3 39.9413 21.0878  18
  -6   4   2 215.392 37.0592  19
   6   4  -2 121.700 29.1339  18
  -6   4   2 145.550 31.0802  25
  -6  -4   1 93.5394 27.3345  22
  -6   4   1 91.4295 29.9450  19
  -6   4   1 103.510 28.8164  25
  -6  -4   0 221.740 36.3288  22
  -6   4   0 288.676 42.3177  19
  -6   4   0 346.102 43.2174  25
  -6  -4  -1 59.6712 24.2541  22
  -6   4  -1 63.9661 27.5272  19
  -6  -4  -2 9.63939 20.0898  22
  -6   4  -2 7.09625 21.5926  19
  -6  -4  -3-24.3633 20.9511  22
  -6  -4  -4 678.454 49.8546  22
  -6   4  -4 845.745 56.5521  25
  -6  -4  -5 17.5149 17.3993  22
  -6  -4  -6 278.180 28.4636  22
  -6  -4  -7 754.603 40.0196  22
   6   4   7 766.996 38.6162  24
   6   5  -5 12.5365 12.5856  18
   6   5  -4 117.867 20.6896  18
   6   5  -3 6.63328 14.1839  18
  -6   5   2 25.5056 18.6565  19
  -6   5   1 5.50961 19.3584  19
  -6   5   1 12.8891 16.7419  25
  -6   5   0 160.665 30.3177  19
  -6   5   0 234.483 32.5445  25
  -6  -5  -1 193.052 28.1020  22
  -6   5  -1 242.556 32.3176  19
  -6   5  -1 246.906 32.8810  25
  -6  -5  -2 391.902 35.6188  22
  -6   5  -2 396.848 37.3837  19
  -6   5  -2 384.244 37.6673  25
  -6  -5  -3 77.6168 19.9729  22
  -6   5  -3 51.1661 18.6208  19
  -6   5  -3 100.385 21.5593  25
  -6  -5  -4 118.074 20.2063  22
  -6   5  -4 78.2511 19.9632  25
  -7   0   6 15.7005 14.4839  21
  -7   0   5 159.039 25.5325  21
  -7   0   4 17.6251 19.2807  21
   7   0  -4-2.71276 15.8060  18
   7   0  -3 60.8110 22.4595  18
   7   0  -2 22.7535 20.3245  18
   7   0  -1 489.305 46.9840  18
   7   0   0-3.33959 19.1611  18
   7   0   1 339.932 38.7707  18
   7   0   2-2.95262 15.8469  18
  -7   0  -2-14.7885 21.6327   5
  -7   0  -3 144.876 27.7247   5
  -7   0  -4-17.8357 18.2746   5
  -7   0  -5 49.1872 18.1480   5
  -7   0  -6-7.38729 14.1423   5
  -7  -1   6 23.8014 14.3860  21
  -7   1   6 22.0444 13.8683   6
  -7  -1   5 64.4545 19.7955  21
   7   1  -5 86.8951 19.9659  18
  -7  -1   4 1140.27 59.9845  21
   7   1  -4 1177.67 62.2115  18
  -7  -1   3 52.3948 21.4885  21
   7   1  -3 20.9292 19.6581  18
   7  -1  -3 65.4304 21.7887  18
   7   1  -2 508.575 47.8385  18
   7  -1  -2 599.698 49.2333  18
  -7   1   1 693.385 55.5677  19
   7   1  -1 747.596 55.1173  18
  -7   1   0 1263.75 72.3515  19
   7   1   0 1196.80 67.6116  18
  -7   1   0 1279.16 73.1310  25
   7   1   1 142.537 26.8189  18
  -7   1  -1 191.170 31.9036  25
  -7   1  -2 1345.21 66.7556   5
  -7  -1  -2 1366.28 69.9561   5
  -7   1  -3 7.49116 16.8000   5
  -7  -1  -3 2.70003 19.7480   5
  -7   1  -4 751.266 46.7309   5
  -7  -1  -4 667.466 47.0671   5
  -7   1  -5 7.70057 14.0815   5
  -7  -1  -5 32.2773 16.9066   5
  -7  -1  -6 54.6521 15.4951   5
  -7  -2   6 528.552 33.5723  21
  -7  -2   5 125.460 21.0623  21
   7   2  -5 101.343 20.3820  18
  -7  -2   4 87.3403 20.3186  21
   7   2  -4 99.0154 21.7908  18
  -7  -2   3 119.308 24.8257  21
   7   2  -3 109.772 23.8561  18
  -7  -2   2 77.9104 25.7494  21
  -7   2   2 38.5324 23.8670  19
   7   2  -2 33.7128 21.8929  18
  -7   2   2 55.2817 22.6730  25
  -7   2   1 1330.71 71.4286  19
   7   2  -1 1176.73 64.1123  18
  -7   2   1 1252.79 69.3002  25
  -7   2   0 1795.66 82.2601  19
   7   2   0 1843.66 78.1661  18
  -7   2   0 1988.50 86.4206  25
  -7   2  -1 1542.97 74.3941  19
  -7   2  -1 1672.38 77.8538  25
  -7   2  -2 1019.32 59.0583  25
  -7  -2  -3 178.736 26.1939   5
  -7  -2  -4 51.7142 17.1258   5
  -7  -2  -5 326.062 27.7095   5
   7   3  -4-5.50096 11.6147  18
  -7   3   3 4.15984 15.3581  19
   7   3  -3-4.11953 12.5349  18
  -7   3   2 11.7389 16.3253  19
   7   3  -2 6.47419 13.1332  18
  -7   3   2-2.24752 14.2361  25
  -7   3   1 197.951 28.3325  19
   7   3  -1 153.051 22.7772  18
  -7   3   1 165.623 26.4297  25
  -7   3   0-4.93208 18.0370  19
  -7   3   0 34.8782 18.0457  25
  -7   3  -1 55.6898 19.1291  19
  -7   3  -1 62.9489 19.9585  25
  -7  -3  -2 112.758 19.4273  22
  -7   3  -2 117.286 21.9065  25
  -7  -3  -3 1.69834 11.2957  22
   0   0   0    0.00    0.00   0

TITL UrAc_273K in P2(1)/n
REM P2(1)/n (#14 in standard setting)
CELL 1.54184   6.202532   7.416307  13.114651  90.0000  90.3776  90.0000
ZERR    4.00   0.000377   0.000508   0.000801   0.0000   0.0059   0.0000
LATT  1
SYMM -x+1/2, y+1/2,-z+1/2
SFAC C H N O
UNIT 20.00 16.00 16.00 12.00
TREF
HKLF 4
END
;
_shelx_hkl_checksum                46982
_olex2_submission_special_instructions  'No special instructions were received'
_oxdiff_exptl_absorpt_empirical_details
;
Empirical correction (ABSPACK) includes:
- Absorption correction using spherical harmonics
- Frame scaling
;
_oxdiff_exptl_absorpt_empirical_full_max  1.187
_oxdiff_exptl_absorpt_empirical_full_min  0.893
loop_
  _twin_individual_id
  _twin_individual_mass_fraction_refined
 1 0.917(2)
 2 0.083(2)
