# Supplementary material
Source: MDPI journal article supplement (https://www.mdpi.com/2075-163X/9/6/373)
Supplement: s1 [file s1 › UAD_+30_last.cif]

data_UAD_+30_uracdih_303k
_audit_creation_date               2019-04-29
_audit_creation_method
;
Olex2 1.2
(compiled 2018.05.29 svn.r3508 for OlexSys, GUI svn.r5506)
;
_shelx_SHELXL_version_number       '2018/3'
_audit_contact_author_address      ?
_audit_contact_author_email        ?
_audit_contact_author_name         ''
_audit_contact_author_phone        ?
_publ_contact_author_id_orcid      ?
_publ_section_references
;
Dolomanov, O.V., Bourhis, L.J., Gildea, R.J, Howard, J.A.K. & Puschmann, H.
 (2009), J. Appl. Cryst. 42, 339-341.

Sheldrick, G.M. (2015). Acta Cryst. C71, 3-8.
;
_chemical_name_common              ?
_chemical_name_systematic          ?
_chemical_formula_moiety           'C5 H4 N4 O3, 2(H2 O)'
_chemical_formula_sum              'C5 H8 N4 O5'
_chemical_formula_weight           204.15
_chemical_melting_point            ?

loop_
  _atom_type_symbol
  _atom_type_description
  _atom_type_scat_dispersion_real
  _atom_type_scat_dispersion_imag
  _atom_type_scat_source
 'C' 'C' 0.0181 0.0091 'International Tables Vol C Tables 4.2.6.8 and 6.1.1.4'
 'H' 'H' 0.0000 0.0000 'International Tables Vol C Tables 4.2.6.8 and 6.1.1.4'
 'N' 'N' 0.0311 0.0180 'International Tables Vol C Tables 4.2.6.8 and 6.1.1.4'
 'O' 'O' 0.0492 0.0322 'International Tables Vol C Tables 4.2.6.8 and 6.1.1.4'

_shelx_space_group_comment
;
The symmetry employed for this shelxl refinement is uniquely defined
by the following loop, which should always be used as a source of
symmetry information in preference to the above space-group names.
They are only intended as comments.
;
_space_group_crystal_system        'monoclinic'
_space_group_IT_number             14
_space_group_name_H-M_alt          'P 1 21/c 1'
_space_group_name_Hall             '-P 2ybc'
loop_
  _space_group_symop_operation_xyz
 'x, y, z'
 '-x, y+1/2, -z+1/2'
 '-x, -y, -z'
 'x, -y-1/2, z-1/2'

_cell_length_a                     7.4283(8)
_cell_length_b                     6.3266(5)
_cell_length_c                     17.5627(16)
_cell_angle_alpha                  90
_cell_angle_beta                   90.044(10)
_cell_angle_gamma                  90
_cell_volume                       825.37(13)
_cell_formula_units_Z              4
_cell_measurement_reflns_used      565
_cell_measurement_temperature      303(2)
_cell_measurement_theta_max        70.0840
_cell_measurement_theta_min        5.0090
_shelx_estimated_absorpt_T_max     ?
_shelx_estimated_absorpt_T_min     ?
_exptl_absorpt_coefficient_mu      1.292
_exptl_absorpt_correction_T_max    1.00000
_exptl_absorpt_correction_T_min    0.31752
_exptl_absorpt_correction_type     multi-scan
_exptl_absorpt_process_details
;
CrysAlisPro 1.171.39.44a (Rigaku Oxford Diffraction, 2018)
Empirical absorption correction using spherical harmonics,
 implemented in SCALE3 ABSPACK scaling algorithm.
;
_exptl_absorpt_special_details     ?
_exptl_crystal_colour              'translucent colorless'
_exptl_crystal_density_diffrn      1.643
_exptl_crystal_density_meas        ?
_exptl_crystal_density_method      ?
_exptl_crystal_description         'prism'
_exptl_crystal_F_000               424
_exptl_crystal_size_max            0.077
_exptl_crystal_size_mid            0.058
_exptl_crystal_size_min            0.022
_exptl_transmission_factor_max     ?
_exptl_transmission_factor_min     ?
_diffrn_reflns_av_R_equivalents    0.0510
_diffrn_reflns_av_unetI/netI       0.0885
_diffrn_reflns_Laue_measured_fraction_full  0.916
_diffrn_reflns_Laue_measured_fraction_max  0.908
_diffrn_reflns_limit_h_max         8
_diffrn_reflns_limit_h_min         -9
_diffrn_reflns_limit_k_max         7
_diffrn_reflns_limit_k_min         -6
_diffrn_reflns_limit_l_max         19
_diffrn_reflns_limit_l_min         -21
_diffrn_reflns_number              3402
_diffrn_reflns_point_group_measured_fraction_full  0.916
_diffrn_reflns_point_group_measured_fraction_max  0.908
_diffrn_reflns_theta_full          67.684
_diffrn_reflns_theta_max           69.959
_diffrn_reflns_theta_min           2.516
_diffrn_ambient_environment        air
_diffrn_ambient_temperature        303(2)
_diffrn_detector                   'CCD plate'
_diffrn_detector_area_resol_mean   ?
_diffrn_detector_type              HyPix3000
_diffrn_measured_fraction_theta_full  0.916
_diffrn_measured_fraction_theta_max  0.908
_diffrn_measurement_details
;
List of Runs (angles in degrees, time in seconds):

  # Type    Start    End  Width  t~exp~   \w     \q     \k     \f   Frames
--------------------------------------------------------------------------
  1  \w    -69.00 -22.00   0.50    3.00    --  -38.82 122.00  29.00   94
  2  \w    -94.00 -60.00   0.50    3.00    --  -38.82 151.00-169.00   68
  3  \w   -100.00 -71.00   0.50    3.00    --  -38.82-151.00 146.00   58
  4  \w     20.00  45.00   0.50    3.00    --   38.82-122.00 -52.00   50
  5  \w     64.00  90.00   0.50    3.00    --   38.82 151.00-169.00   52
  6  \w     37.00  62.00   0.50    3.00    --   38.82-151.00 146.00   50
  7  \w     91.00 124.00   0.50    6.00    --  100.00 151.00-169.00   66
  8  \w     68.00 108.00   0.50    6.00    --  100.00-122.00 -52.00   80
  9  \w    -55.00 -29.00   0.50    3.00    --  -38.82  54.00 -60.00   52
 10  \w    -15.00  11.00   0.50    3.00    --  -38.82 104.00 150.00   52
 11  \w    -73.00 -31.00   0.50    3.00    --  -38.82 104.00 150.00   84
 12  \w     -5.00  26.00   0.50    3.00    --  -38.82  54.00 -60.00   62
 13  \w     78.00 104.00   0.50    3.00    --   38.82  32.00  30.00   52
 14  \w    -24.00   5.00   0.50    3.00    --   38.82 -43.00 -60.00   58
 15  \w     20.00  45.00   0.50    3.00    --   38.82 -32.00  30.00   50
 16  \w     43.00  68.00   0.50    3.00    --   38.82-104.00 -30.00   50
 17  \w     24.00  81.00   0.50    3.00    --   38.82  54.00-120.00  114
 18  \w    -27.00  10.00   0.50    3.00    --   38.82 -32.00  30.00   74
 19  \w    -14.00  32.00   0.50    3.00    --   38.82-104.00 -30.00   92
 20  \w     37.00  74.00   0.50    3.00    --   38.82  32.00  30.00   74
 21  \w     21.00  50.00   0.50    3.00    --   38.82 -43.00 -60.00   58
 22  \w     24.00  51.00   0.50    6.00    --  100.00   0.00-180.00   54
 23  \w     96.00 125.00   0.50    6.00    --  100.00 -69.00-120.00   58
 24  \w    116.00 141.00   0.50    6.00    --  100.00  30.00 -90.00   50
 25  \w     89.00 156.00   0.50    6.00    --  100.00 133.00-180.00  134
 26  \w     34.00  80.00   0.50    6.00    --  100.00 -69.00-120.00   92
 27  \w    109.00 135.00   0.50    6.00    --  100.00 111.00-120.00   52
 28  \w     71.00 132.00   0.50    6.00    --  100.00  15.00-150.00  122
 29  \w     84.00 152.00   0.50    6.00    --  100.00  61.00-120.00  136
 30  \w     93.00 143.00   0.50    6.00    --  100.00  37.00 150.00  100
 31  \w     56.00 103.00   0.50    6.00    --  100.00 -61.00-180.00   94
 32  \w     36.00  90.00   0.50    6.00    --  100.00 -37.00 120.00  108
 33  \w     98.00 123.00   0.50    6.00    --  100.00  45.00-150.00   50
 34  \w     31.00 109.00   0.50    6.00    --  100.00 -86.00 120.00  156
 35  \w     71.00  98.50   0.50    6.00    --  100.00 133.00 -90.00   55
;
_diffrn_measurement_device         'four-circle diffractometer'
_diffrn_measurement_device_type   
 'SuperNova, Single source at offset/far, HyPix3000'
_diffrn_measurement_method         '\w scans'
_diffrn_orient_matrix_type        
 'CrysAlisPro convention (1999,Acta A55,543-557)'
_diffrn_orient_matrix_UB_11        0.2024567000
_diffrn_orient_matrix_UB_12        -0.0514879000
_diffrn_orient_matrix_UB_13        0.0040202000
_diffrn_orient_matrix_UB_21        -0.0387873000
_diffrn_orient_matrix_UB_22        -0.1740002000
_diffrn_orient_matrix_UB_23        0.0591076000
_diffrn_orient_matrix_UB_31        -0.0229445000
_diffrn_orient_matrix_UB_32        -0.1623649000
_diffrn_orient_matrix_UB_33        -0.0646827000
_diffrn_radiation_monochromator    mirror
_diffrn_radiation_probe            x-ray
_diffrn_radiation_type             CuK\a
_diffrn_radiation_wavelength       1.54184
_diffrn_source                     'micro-focus sealed X-ray tube'
_diffrn_source_type                'SuperNova (Cu) X-ray Source'
_reflns_Friedel_coverage           0.000
_reflns_Friedel_fraction_full      .
_reflns_Friedel_fraction_max       .
_reflns_number_gt                  510
_reflns_number_total               1415
_reflns_odcompleteness_completeness  89.58
_reflns_odcompleteness_iscentric   1
_reflns_odcompleteness_theta       70.93
_reflns_special_details
;
 Reflections were merged by SHELXL according to the crystal
 class for the calculation of statistics and refinement.
 
 _reflns_Friedel_fraction is defined as the number of unique
 Friedel pairs measured divided by the number that would be
 possible theoretically, ignoring centric projections and
 systematic absences. Completness statistics refer to single and
 composite reflections containing twin component 1 only.
;
_reflns_threshold_expression       'I > 2\s(I)'
_computing_cell_refinement         'CrysAlisPro 1.171.39.44a (Rigaku OD, 2018)'
_computing_data_collection         'CrysAlisPro 1.171.39.44a (Rigaku OD, 2018)'
_computing_data_reduction          'CrysAlisPro 1.171.39.44a (Rigaku OD, 2018)'
_computing_molecular_graphics      'Olex2 (Dolomanov et al., 2009)'
_computing_publication_material    'Olex2 (Dolomanov et al., 2009)'
_computing_structure_refinement    'ShelXL (Sheldrick, 2015)'
_computing_structure_solution      'ShelXT (Sheldrick, 2015)'
_refine_diff_density_max           0.279
_refine_diff_density_min           -0.438
_refine_diff_density_rms           0.098
_refine_ls_extinction_coef         .
_refine_ls_extinction_method       none
_refine_ls_goodness_of_fit_ref     0.969
_refine_ls_hydrogen_treatment      mixed
_refine_ls_matrix_type             full
_refine_ls_number_parameters       165
_refine_ls_number_reflns           1415
_refine_ls_number_restraints       6
_refine_ls_R_factor_all            0.2102
_refine_ls_R_factor_gt             0.0941
_refine_ls_restrained_S_all        0.967
_refine_ls_shift/su_max            0.000
_refine_ls_shift/su_mean           0.000
_refine_ls_structure_factor_coef   Fsqd
_refine_ls_weighting_details      
 'w=1/[\s^2^(Fo^2^)+(0.1900P)^2^] where P=(Fo^2^+2Fc^2^)/3'
_refine_ls_weighting_scheme        calc
_refine_ls_wR_factor_gt            0.2485
_refine_ls_wR_factor_ref           0.3462
_refine_special_details
;
 Refined as a 2-component twin.
;
_olex2_refinement_description
;
1. Twinned data refinement
 Scales: 0.376(15)
 0.624(15)
2. Fixed Uiso
 At 1.2 times of:
  All N(H) groups
 At 1.5 times of:
  All O(H,H) groups
3. Restrained distances
 OW1-HW1A = OW1-HW1B
 0.95 with sigma of 0.02
 HW1A-O3B
 1.7 with sigma of 0.02
 OW2-HW2A = OW2-HW2B
 0.95 with sigma of 0.02
 HW2B-O1B_$1
 2.1 with sigma of 0.02
4. Uiso/Uaniso restraints and constraints
Uanis(C1A) = Uanis(C1B)
Uanis(C2A) = Uanis(C2B) = Uanis(C3A) = Uanis(C3B)
Uanis(C4A) = Uanis(C4B)
Uanis(C5A) = Uanis(C5B)
Uanis(N1A) = Uanis(N1B) = Uanis(N3A) = Uanis(N3B)
Uanis(N2A) = Uanis(N2B)
Uanis(N4A) = Uanis(N4B)
Uanis(O1A) = Uanis(O1B)
Uanis(O2A) = Uanis(O2B)
Uanis(O3A) = Uanis(O3B)
5. Others
 Sof(C1B)=Sof(C2B)=Sof(C3B)=Sof(C4B)=Sof(C5B)=Sof(N1B)=Sof(H1B)=Sof(N2B)=
 Sof(H2B)=Sof(N3B)=Sof(H3B)=Sof(N4B)=Sof(H4B)=Sof(O1B)=Sof(O2B)=Sof(O3B)=1-
 FVAR(1)
 Sof(C1A)=Sof(C2A)=Sof(C3A)=Sof(C4A)=Sof(C5A)=Sof(N1A)=Sof(H1A)=Sof(N2A)=
 Sof(H2A)=Sof(N3A)=Sof(H3A)=Sof(N4A)=Sof(H4A)=Sof(O1A)=Sof(O2A)=Sof(O3A)=FVAR(1)
6.a Aromatic/amide H refined with riding coordinates:
 N1A(H1A), N2A(H2A), N3A(H3A), N4A(H4A), N1B(H1B), N2B(H2B), N3B(H3B), N4B(H4B)
;
_atom_sites_solution_hydrogens     mixed
_atom_sites_solution_primary       ?
_atom_sites_solution_secondary     ?
loop_
  _atom_site_label
  _atom_site_type_symbol
  _atom_site_fract_x
  _atom_site_fract_y
  _atom_site_fract_z
  _atom_site_U_iso_or_equiv
  _atom_site_adp_type
  _atom_site_occupancy
  _atom_site_site_symmetry_order
  _atom_site_calc_flag
  _atom_site_refinement_flags_posn
  _atom_site_refinement_flags_adp
  _atom_site_refinement_flags_occupancy
  _atom_site_disorder_assembly
  _atom_site_disorder_group
 C1A C 0.091(4) 0.200(5) -0.4308(14) 0.070(8) Uani 0.560(9) 1 d . . P A 1
 C2A C 0.265(5) 0.528(3) -0.3972(12) 0.063(3) Uani 0.560(9) 1 d . . P A 1
 C3A C 0.280(3) 0.576(3) -0.4771(11) 0.063(3) Uani 0.560(9) 1 d . . P A 1
 C4A C 0.229(3) 0.428(3) -0.5350(10) 0.062(4) Uani 0.560(9) 1 d . . P A 1
 C5A C 0.423(3) 0.829(3) -0.4050(14) 0.059(7) Uani 0.560(9) 1 d . . P A 1
 N1A N 0.131(5) 0.257(4) -0.5022(16) 0.062(5) Uani 0.560(9) 1 d . . P A 1
 H1A H 0.087351 0.171707 -0.535685 0.075 Uiso 0.560(9) 1 calc R . P A 1
 N2A N 0.154(3) 0.347(3) -0.3793(10) 0.053(5) Uani 0.560(9) 1 d . . P A 1
 H2A H 0.125312 0.329212 -0.332346 0.063 Uiso 0.560(9) 1 calc R . P A 1
 N3A N 0.379(5) 0.760(4) -0.4804(17) 0.062(5) Uani 0.560(9) 1 d . . P A 1
 H3A H 0.409241 0.824246 -0.521607 0.075 Uiso 0.560(9) 1 calc R . P A 1
 N4A N 0.354(3) 0.681(3) -0.3576(10) 0.056(5) Uani 0.560(9) 1 d . . P A 1
 H4A H 0.364047 0.683607 -0.308818 0.068 Uiso 0.560(9) 1 calc R . P A 1
 O1A O 0.009(4) 0.050(3) -0.4076(12) 0.089(5) Uani 0.560(9) 1 d . . P A 1
 O2A O 0.229(4) 0.451(2) -0.6057(12) 0.081(4) Uani 0.560(9) 1 d . . P A 1
 O3A O 0.475(4) 0.993(3) -0.3922(14) 0.084(5) Uani 0.560(9) 1 d . . P A 1
 C1B C 0.371(6) 0.801(6) -0.4284(18) 0.070(8) Uani 0.440(9) 1 d . . P A 2
 C2B C 0.241(6) 0.479(4) -0.4095(17) 0.063(3) Uani 0.440(9) 1 d . . P A 2
 C3B C 0.212(4) 0.434(3) -0.4812(13) 0.063(3) Uani 0.440(9) 1 d . . P A 2
 C4B C 0.283(4) 0.564(4) -0.5283(13) 0.062(4) Uani 0.440(9) 1 d . . P A 2
 C5B C 0.120(5) 0.195(5) -0.4067(19) 0.059(7) Uani 0.440(9) 1 d . . P A 2
 N1B N 0.349(7) 0.752(6) -0.502(2) 0.062(5) Uani 0.440(9) 1 d . . P A 2
 H1B H 0.379613 0.844918 -0.535725 0.075 Uiso 0.440(9) 1 calc R . P A 2
 N2B N 0.303(4) 0.659(4) -0.3779(14) 0.053(5) Uani 0.440(9) 1 d . . P A 2
 H2B H 0.300784 0.681604 -0.329687 0.063 Uiso 0.440(9) 1 calc R . P A 2
 N3B N 0.124(7) 0.236(6) -0.480(3) 0.062(5) Uani 0.440(9) 1 d . . P A 2
 H3B H 0.083827 0.161617 -0.517010 0.075 Uiso 0.440(9) 1 calc R . P A 2
 N4B N 0.198(3) 0.328(4) -0.3544(13) 0.056(5) Uani 0.440(9) 1 d . . P A 2
 H4B H 0.213723 0.321408 -0.305980 0.068 Uiso 0.440(9) 1 calc R . P A 2
 O1B O 0.490(6) 0.957(5) -0.4068(17) 0.089(5) Uani 0.440(9) 1 d D . P A 2
 O2B O 0.270(5) 0.542(3) -0.5978(16) 0.081(4) Uani 0.440(9) 1 d . . P A 2
 O3B O 0.035(5) 0.015(4) -0.3902(16) 0.084(5) Uani 0.440(9) 1 d D . P A 2
 OW1 O -0.096(2) -0.2223(16) -0.2787(5) 0.138(4) Uani 1 1 d D . . . .
 HW1A H -0.05(3) -0.14(2) -0.320(6) 0.207 Uiso 1 1 d DR . . . .
 HW1B H -0.14(3) -0.32(2) -0.313(8) 0.207 Uiso 1 1 d DR . . . .
 OW2 O 0.395(2) 0.7387(11) -0.2172(6) 0.138(5) Uani 1 1 d D . . . .
 HW2A H 0.35(3) 0.84(2) -0.182(8) 0.207 Uiso 1 1 d DR . . . .
 HW2B H 0.43(3) 0.608(10) -0.195(4) 0.207 Uiso 1 1 d DR . . . .

loop_
  _atom_site_aniso_label
  _atom_site_aniso_U_11
  _atom_site_aniso_U_22
  _atom_site_aniso_U_33
  _atom_site_aniso_U_23
  _atom_site_aniso_U_13
  _atom_site_aniso_U_12
 C1A 0.099(18) 0.069(10) 0.041(12) -0.022(10) -0.035(13) 0.036(10)
 C2A 0.084(7) 0.049(5) 0.056(5) -0.034(6) 0.002(8) 0.001(6)
 C3A 0.084(7) 0.049(5) 0.056(5) -0.034(6) 0.002(8) 0.001(6)
 C4A 0.085(10) 0.048(6) 0.052(6) -0.028(8) -0.018(12) 0.025(8)
 C5A 0.058(12) 0.057(10) 0.061(15) 0.029(11) -0.032(10) -0.032(8)
 N1A 0.093(6) 0.043(3) 0.051(17) -0.001(6) 0.000(10) -0.014(4)
 N2A 0.069(13) 0.051(6) 0.037(8) -0.023(7) -0.033(8) 0.020(8)
 N3A 0.093(6) 0.043(3) 0.051(17) -0.001(6) 0.000(10) -0.014(4)
 N4A 0.058(11) 0.071(7) 0.040(9) -0.011(7) -0.017(9) -0.023(8)
 O1A 0.132(14) 0.084(9) 0.050(7) 0.012(8) 0.015(13) -0.004(9)
 O2A 0.118(11) 0.073(9) 0.053(5) -0.026(9) 0.008(9) -0.011(10)
 O3A 0.109(11) 0.053(6) 0.090(11) -0.024(6) 0.017(13) -0.004(7)
 C1B 0.099(18) 0.069(10) 0.041(12) -0.022(10) -0.035(13) 0.036(10)
 C2B 0.084(7) 0.049(5) 0.056(5) -0.034(6) 0.002(8) 0.001(6)
 C3B 0.084(7) 0.049(5) 0.056(5) -0.034(6) 0.002(8) 0.001(6)
 C4B 0.085(10) 0.048(6) 0.052(6) -0.028(8) -0.018(12) 0.025(8)
 C5B 0.058(12) 0.057(10) 0.061(15) 0.029(11) -0.032(10) -0.032(8)
 N1B 0.093(6) 0.043(3) 0.051(17) -0.001(6) 0.000(10) -0.014(4)
 N2B 0.069(13) 0.051(6) 0.037(8) -0.023(7) -0.033(8) 0.020(8)
 N3B 0.093(6) 0.043(3) 0.051(17) -0.001(6) 0.000(10) -0.014(4)
 N4B 0.058(11) 0.071(7) 0.040(9) -0.011(7) -0.017(9) -0.023(8)
 O1B 0.132(14) 0.084(9) 0.050(7) 0.012(8) 0.015(13) -0.004(9)
 O2B 0.118(11) 0.073(9) 0.053(5) -0.026(9) 0.008(9) -0.011(10)
 O3B 0.109(11) 0.053(6) 0.090(11) -0.024(6) 0.017(13) -0.004(7)
 OW1 0.190(12) 0.129(7) 0.096(6) -0.003(5) 0.016(8) -0.040(9)
 OW2 0.213(14) 0.110(6) 0.091(5) 0.007(5) 0.012(8) 0.014(9)

_geom_special_details
;
 All esds (except the esd in the dihedral angle between two l.s. planes)
 are estimated using the full covariance matrix.  The cell esds are taken
 into account individually in the estimation of esds in distances, angles
 and torsion angles; correlations between esds in cell parameters are only
 used when they are defined by crystal symmetry.  An approximate (isotropic)
 treatment of cell esds is used for estimating esds involving l.s. planes.
;
loop_
  _geom_bond_atom_site_label_1
  _geom_bond_atom_site_label_2
  _geom_bond_distance
  _geom_bond_site_symmetry_2
  _geom_bond_publ_flag
 C1A N1A 1.34(3) . ?
 C1A N2A 1.38(3) . ?
 C1A O1A 1.20(4) . ?
 C2A C3A 1.44(3) . ?
 C2A N2A 1.44(3) . ?
 C2A N4A 1.36(3) . ?
 C3A C4A 1.44(2) . ?
 C3A N3A 1.38(4) . ?
 C4A N1A 1.43(3) . ?
 C4A O2A 1.25(3) . ?
 C5A N3A 1.43(3) . ?
 C5A N4A 1.35(3) . ?
 C5A O3A 1.13(3) . ?
 C1B N1B 1.35(4) . ?
 C1B N2B 1.36(5) . ?
 C1B O1B 1.38(5) . ?
 C2B C3B 1.31(4) . ?
 C2B C5B 2.01(4) . ?
 C2B N2B 1.35(3) . ?
 C2B N4B 1.40(4) . ?
 C3B C4B 1.28(3) . ?
 C3B N3B 1.41(4) . ?
 C4B N1B 1.36(4) . ?
 C4B O2B 1.23(4) . ?
 C5B N3B 1.31(5) . ?
 C5B N4B 1.37(4) . ?
 C5B O3B 1.34(4) . ?

loop_
  _geom_angle_atom_site_label_1
  _geom_angle_atom_site_label_2
  _geom_angle_atom_site_label_3
  _geom_angle
  _geom_angle_site_symmetry_1
  _geom_angle_site_symmetry_3
  _geom_angle_publ_flag
 N1A C1A N2A 111(3) . . ?
 O1A C1A N1A 130(3) . . ?
 O1A C1A N2A 119(3) . . ?
 C3A C2A N2A 115.2(19) . . ?
 N4A C2A C3A 108(2) . . ?
 N4A C2A N2A 136.8(19) . . ?
 C4A C3A C2A 122.0(19) . . ?
 N3A C3A C2A 105(2) . . ?
 N3A C3A C4A 132(2) . . ?
 N1A C4A C3A 110.1(19) . . ?
 O2A C4A C3A 129(2) . . ?
 O2A C4A N1A 119(2) . . ?
 N4A C5A N3A 106(2) . . ?
 O3A C5A N3A 123(3) . . ?
 O3A C5A N4A 130(3) . . ?
 C1A N1A C4A 134(3) . . ?
 C1A N2A C2A 126(2) . . ?
 C3A N3A C5A 110(3) . . ?
 C5A N4A C2A 111.2(19) . . ?
 N1B C1B N2B 116(3) . . ?
 N1B C1B O1B 121(4) . . ?
 N2B C1B O1B 122(3) . . ?
 C3B C2B C5B 76(2) . . ?
 C3B C2B N2B 130(3) . . ?
 C3B C2B N4B 119(3) . . ?
 N2B C2B C5B 154(3) . . ?
 N2B C2B N4B 112(2) . . ?
 N4B C2B C5B 43.0(16) . . ?
 C2B C3B N3B 105(3) . . ?
 C4B C3B C2B 114(3) . . ?
 C4B C3B N3B 141(3) . . ?
 C3B C4B N1B 120(3) . . ?
 O2B C4B C3B 122(3) . . ?
 O2B C4B N1B 117(3) . . ?
 N3B C5B C2B 78(2) . . ?
 N3B C5B N4B 122(3) . . ?
 N3B C5B O3B 113(3) . . ?
 N4B C5B C2B 44.0(16) . . ?
 O3B C5B C2B 169(3) . . ?
 O3B C5B N4B 125(3) . . ?
 C1B N1B C4B 125(4) . . ?
 C2B N2B C1B 115(2) . . ?
 C5B N3B C3B 102(4) . . ?
 C5B N4B C2B 93(2) . . ?

loop_
  _geom_hbond_atom_site_label_D
  _geom_hbond_atom_site_label_H
  _geom_hbond_atom_site_label_A
  _geom_hbond_distance_DH
  _geom_hbond_distance_HA
  _geom_hbond_distance_DA
  _geom_hbond_angle_DHA
  _geom_hbond_site_symmetry_A
  _geom_hbond_publ_flag
 N1A H1A O1A 0.86 1.86 2.71(4) 168.7 3_554 yes
 N2A H2A OW1 0.86 1.99 2.843(19) 171.5 2_554 yes
 N3A H3A O3A 0.86 2.09 2.94(4) 168.2 3_674 yes
 N4A H4A OW2 0.86 1.66 2.510(19) 168.6 . yes
 N1B H1B O1B 0.86 1.88 2.71(6) 163.2 3_674 yes
 N2B H2B OW2 0.86 2.13 2.95(2) 159.4 . yes
 N3B H3B O3B 0.86 2.16 3.02(6) 176.1 3_554 yes
 N4B H4B OW1 0.86 1.75 2.48(2) 141.4 2_554 yes
 OW1 HW1A O1A 0.951(19) 2.00(4) 2.95(2) 175(18) . yes
 OW1 HW1A O3B 0.951(19) 1.703(19) 2.65(2) 175(19) . yes
 OW1 HW1B O2A 0.95(2) 1.75(6) 2.68(2) 163(16) 3_554 yes
 OW1 HW1B O2B 0.95(2) 2.29(4) 3.23(2) 174(15) 3_554 yes
 OW2 HW2A O2A 0.95(2) 2.09(3) 3.04(2) 175(19) 4_576 yes
 OW2 HW2A O2B 0.95(2) 1.76(6) 2.68(3) 162(16) 4_576 yes
 OW2 HW2B O3A 0.95(2) 1.83(6) 2.65(2) 143(7) 2_644 yes
 OW2 HW2B O1B 0.95(2) 2.11(2) 2.94(3) 145(6) 2_644 yes

loop_
  _geom_torsion_atom_site_label_1
  _geom_torsion_atom_site_label_2
  _geom_torsion_atom_site_label_3
  _geom_torsion_atom_site_label_4
  _geom_torsion
  _geom_torsion_site_symmetry_1
  _geom_torsion_site_symmetry_2
  _geom_torsion_site_symmetry_3
  _geom_torsion_site_symmetry_4
  _geom_torsion_publ_flag
 C2A C3A C4A N1A 12(3) . . . . ?
 C2A C3A C4A O2A 177(3) . . . . ?
 C2A C3A N3A C5A -1(3) . . . . ?
 C3A C2A N2A C1A 12(4) . . . . ?
 C3A C2A N4A C5A 1(3) . . . . ?
 C3A C4A N1A C1A -7(5) . . . . ?
 C4A C3A N3A C5A -168(2) . . . . ?
 N1A C1A N2A C2A -6(4) . . . . ?
 N2A C1A N1A C4A 4(5) . . . . ?
 N2A C2A C3A C4A -15(3) . . . . ?
 N2A C2A C3A N3A 176(2) . . . . ?
 N2A C2A N4A C5A -173(3) . . . . ?
 N3A C3A C4A N1A 178(2) . . . . ?
 N3A C3A C4A O2A -17(4) . . . . ?
 N3A C5A N4A C2A -2(3) . . . . ?
 N4A C2A C3A C4A 169(2) . . . . ?
 N4A C2A C3A N3A 0(3) . . . . ?
 N4A C2A N2A C1A -174(3) . . . . ?
 N4A C5A N3A C3A 1(4) . . . . ?
 O1A C1A N1A C4A -179(3) . . . . ?
 O1A C1A N2A C2A 176(3) . . . . ?
 O2A C4A N1A C1A -173(4) . . . . ?
 O3A C5A N3A C3A -166(3) . . . . ?
 O3A C5A N4A C2A 164(3) . . . . ?
 C2B C3B C4B N1B -12(5) . . . . ?
 C2B C3B C4B O2B 179(3) . . . . ?
 C2B C3B N3B C5B -1(4) . . . . ?
 C2B C5B N3B C3B 1(3) . . . . ?
 C3B C2B N2B C1B -11(6) . . . . ?
 C3B C2B N4B C5B -6(4) . . . . ?
 C3B C4B N1B C1B 10(7) . . . . ?
 C4B C3B N3B C5B 169(4) . . . . ?
 C5B C2B C3B C4B -173(3) . . . . ?
 C5B C2B C3B N3B 1(3) . . . . ?
 C5B C2B N2B C1B -176(6) . . . . ?
 N1B C1B N2B C2B 7(5) . . . . ?
 N2B C1B N1B C4B -7(7) . . . . ?
 N2B C2B C3B C4B 14(6) . . . . ?
 N2B C2B C3B N3B -173(5) . . . . ?
 N2B C2B N4B C5B 172(4) . . . . ?
 N3B C3B C4B N1B 178(4) . . . . ?
 N3B C3B C4B O2B 9(6) . . . . ?
 N3B C5B N4B C2B 5(5) . . . . ?
 N4B C2B C3B C4B -168(3) . . . . ?
 N4B C2B C3B N3B 5(5) . . . . ?
 N4B C2B N2B C1B 171(3) . . . . ?
 N4B C5B N3B C3B -3(5) . . . . ?
 O1B C1B N1B C4B 159(4) . . . . ?
 O1B C1B N2B C2B -159(4) . . . . ?
 O2B C4B N1B C1B 180(4) . . . . ?
 O3B C5B N3B C3B 177(3) . . . . ?
 O3B C5B N4B C2B -175(4) . . . . ?


_shelx_res_file
;
TITL UrAcDih_303K in P2(1)/c
    uracdih_303k.res
    created by SHELXL-2018/3 at 23:58:45 on 29-Apr-2019
REM transformed to space group :
REM P2(1)/c (#14 in standard setting)
CELL 1.54184 7.4283 6.3266 17.5627 90 90.044 90
ZERR 4 0.0008 0.0005 0.0016 0 0.01 0
LATT 1
SYMM -X,0.5+Y,0.5-Z
SFAC C H N O
UNIT 20 32 16 20
EQIV $1 1-X,-0.5+Y,-0.5-Z
DFIX 0.95 OW1 HW1a OW1 HW1b
DFIX 1.7 HW1a O3B
DFIX 0.95 OW2 HW2a OW2 HW2b
DFIX 2.1 HW2b O1B_$1
EADP C1A C1B
EADP C2A C2B C3A C3B
EADP C4A C4B
EADP C5A C5B
EADP N1A N1B N3A N3B
EADP N2A N2B
EADP N4A N4B
EADP O1A O1B
EADP O2A O2B
EADP O3A O3B

L.S. 20
PLAN  20
BOND
list 4
fmap 2 53
acta
TWIN -1 0 0 0 -1 0 0 0 1 2
OMIT -4 140
OMIT 0 2 5
OMIT -6 1 14
OMIT 1 1 0
OMIT -6 1 13
REM <olex2.extras>
REM <HklSrc "%.\\UrAcDih_303K.hkl">
REM </olex2.extras>

WGHT    0.190000
BASF   0.62412
FVAR       1.92351   0.56041
PART 1
C1A   1    0.091133    0.199599   -0.430827    21.00000    0.09902    0.06908 =
         0.04073   -0.02184   -0.03499    0.03560
C2A   1    0.264895    0.527703   -0.397152    21.00000    0.08444    0.04856 =
         0.05609   -0.03408    0.00243    0.00071
C3A   1    0.280395    0.576107   -0.477058    21.00000    0.08444    0.04856 =
         0.05609   -0.03408    0.00243    0.00071
C4A   1    0.229388    0.427693   -0.535011    21.00000    0.08515    0.04778 =
         0.05198   -0.02819   -0.01819    0.02470
C5A   1    0.422911    0.828502   -0.404991    21.00000    0.05758    0.05746 =
         0.06093    0.02917   -0.03208   -0.03205
N1A   3    0.130802    0.256713   -0.502169    21.00000    0.09265    0.04289 =
         0.05100   -0.00066    0.00021   -0.01355
AFIX  43
H1A   2    0.087351    0.171707   -0.535685    21.00000   -1.20000
AFIX   0
N2A   3    0.154405    0.346886   -0.379303    21.00000    0.06946    0.05118 =
         0.03695   -0.02264   -0.03324    0.01986
AFIX  43
H2A   2    0.125312    0.329212   -0.332346    21.00000   -1.20000
AFIX   0
N3A   3    0.378811    0.760063   -0.480415    21.00000    0.09265    0.04289 =
         0.05100   -0.00066    0.00021   -0.01355
AFIX  43
H3A   2    0.409241    0.824246   -0.521607    21.00000   -1.20000
AFIX   0
N4A   3    0.353547    0.680974   -0.357578    21.00000    0.05839    0.07089 =
         0.04006   -0.01077   -0.01745   -0.02295
AFIX  43
H4A   2    0.364047    0.683607   -0.308818    21.00000   -1.20000
AFIX   0
O1A   4    0.009212    0.050119   -0.407605    21.00000    0.13196    0.08362 =
         0.05028    0.01232    0.01499   -0.00381
O2A   4    0.228689    0.450915   -0.605677    21.00000    0.11776    0.07315 =
         0.05288   -0.02624    0.00786   -0.01058
O3A   4    0.474800    0.992919   -0.392151    21.00000    0.10860    0.05273 =
         0.08976   -0.02448    0.01722   -0.00429

PART 0
PART 2
C1B   1    0.371418    0.800946   -0.428359   -21.00000    0.09902    0.06908 =
         0.04073   -0.02184   -0.03499    0.03560
C2B   1    0.240654    0.479293   -0.409529   -21.00000    0.08444    0.04856 =
         0.05609   -0.03408    0.00243    0.00071
C3B   1    0.211572    0.434304   -0.481216   -21.00000    0.08444    0.04856 =
         0.05609   -0.03408    0.00243    0.00071
C4B   1    0.282687    0.564377   -0.528347   -21.00000    0.08515    0.04778 =
         0.05198   -0.02819   -0.01819    0.02470
C5B   1    0.120471    0.195220   -0.406739   -21.00000    0.05758    0.05746 =
         0.06093    0.02917   -0.03208   -0.03205
N1B   3    0.349420    0.751655   -0.502478   -21.00000    0.09265    0.04289 =
         0.05100   -0.00066    0.00021   -0.01355
AFIX  43
H1B   2    0.379613    0.844918   -0.535725   -21.00000   -1.20000
AFIX   0
N2B   3    0.303457    0.658750   -0.377943   -21.00000    0.06946    0.05118 =
         0.03695   -0.02264   -0.03324    0.01986
AFIX  43
H2B   2    0.300784    0.681604   -0.329687   -21.00000   -1.20000
AFIX   0
N3B   3    0.124102    0.235984   -0.479714   -21.00000    0.09265    0.04289 =
         0.05100   -0.00066    0.00021   -0.01355
AFIX  43
H3B   2    0.083827    0.161617   -0.517010   -21.00000   -1.20000
AFIX   0
N4B   3    0.197739    0.328316   -0.354420   -21.00000    0.05839    0.07089 =
         0.04006   -0.01077   -0.01745   -0.02295
AFIX  43
H4B   2    0.213723    0.321408   -0.305980   -21.00000   -1.20000
AFIX   0
O1B   4    0.489916    0.957055   -0.406793   -21.00000    0.13196    0.08362 =
         0.05028    0.01232    0.01499   -0.00381
O2B   4    0.269632    0.541871   -0.597762   -21.00000    0.11776    0.07315 =
         0.05288   -0.02624    0.00786   -0.01058
O3B   4    0.034760    0.014771   -0.390248   -21.00000    0.10860    0.05273 =
         0.08976   -0.02448    0.01722   -0.00429

PART 0
OW1   4   -0.096100   -0.222304   -0.278715    11.00000    0.18985    0.12896 =
         0.09609   -0.00335    0.01594   -0.04038
HW1A  2   -0.054776   -0.138999   -0.320282    11.00000   -1.50000
HW1B  2   -0.144912   -0.324024   -0.312817    11.00000   -1.50000

OW2   4    0.395062    0.738728   -0.217240    11.00000    0.21264    0.11013 =
         0.09142    0.00714    0.01226    0.01368
HW2A  2    0.349002    0.840069   -0.182335    11.00000   -1.50000
HW2B  2    0.431217    0.607877   -0.194897    11.00000   -1.50000
HKLF 4


REM  UrAcDih_303K in P2(1)/c
REM wR2 = 0.3462, GooF = S = 0.969, Restrained GooF = 0.967 for all data
REM R1 = 0.0941 for 510 Fo > 4sig(Fo) and 0.2102 for all 1415 data
REM 165 parameters refined using 6 restraints

END

WGHT      0.1900      0.0000

REM Highest difference peak  0.279,  deepest hole -0.438,  1-sigma level  0.098
Q1    1   0.5374  1.0641 -0.4035  11.00000  0.05    0.28
Q2    1   0.2594  0.5469 -0.6250  11.00000  0.05    0.26
Q3    1   0.3589  0.7018 -0.6029  11.00000  0.05    0.26
Q4    1   0.4703  0.8016 -0.3026  11.00000  0.05    0.25
Q5    1   0.1564  0.8228 -0.2154  11.00000  0.05    0.25
Q6    1   0.2408  0.5070 -0.6550  11.00000  0.05    0.25
Q7    1   0.2140  0.7058 -0.2007  11.00000  0.05    0.24
Q8    1   0.2519  0.2956 -0.2940  11.00000  0.05    0.24
Q9    1   0.1883  0.7196 -0.2771  11.00000  0.05    0.24
Q10   1  -0.3499 -0.2281 -0.2795  11.00000  0.05    0.23
Q11   1   0.3559  1.0399 -0.1993  11.00000  0.05    0.23
Q12   1  -0.1396 -0.2754 -0.3840  11.00000  0.05    0.22
Q13   1   0.0027  0.0154 -0.4619  11.00000  0.05    0.22
Q14   1  -0.2046 -0.0740 -0.2743  11.00000  0.05    0.22
Q15   1  -0.0494 -0.3398 -0.2209  11.00000  0.05    0.22
Q16   1  -0.1807 -0.0483 -0.2619  11.00000  0.05    0.22
Q17   1   0.3009  0.3009 -0.2853  11.00000  0.05    0.21
Q18   1   0.1272  0.0826 -0.3043  11.00000  0.05    0.21
Q19   1   0.0829 -0.2793 -0.3635  11.00000  0.05    0.21
Q20   1   0.4282  0.3145 -0.3568  11.00000  0.05    0.21
;
_shelx_res_checksum                46768
_shelx_hkl_file
;
   0   0   1 4.56548 2.46839  17
   0   0  -1 2.32853 1.57016   3
   0   0  -1 3.83285 2.67701  12
   0   0  -1 4.11555 3.61387  19
   0   0  -2 17841.5 366.993  11
   0   0   2 17813.8 364.912  18
   0   0  -2 17931.7 366.237  12
   0   0   2 17783.2 365.959  17
   0   0  -2 18144.9 365.183   3
   0   0  -2 18347.5 368.971  19
   0   0  -3 2.83116 7.42675  11
   0   0  -3 15.3050 8.02602  12
   0   0  -3 4.65137 4.75428   3
   0   0   3 8.40516 7.31614  18
   0   0  -3 20.8046 11.3971  19
   0   0   3 13.2530 8.10126  17
   0   0  -4 2202.18 60.7944  19
   0   0  -4 2125.95 54.8000  12
   0   0  -4 2230.89 52.9169   3
   0   0  -4 2136.63 56.4118  11
   0   0   4 2258.93 55.2152  17
   0   0   5 24.4330 14.4168  17
   0   0  -5 19.2346 18.1863  19
   0   0  -5 14.3868 7.96553   3
   0   0  -6 4899.22 112.689   4
   0   0  -6 4939.14 123.638  19
   0   0   6 4680.54 115.363  17
   0   0  -6 4817.73 110.842   3
   0   0  -7 0.57438 7.97290   4
   0   0  -7-2.62553 7.71114   3
   0   0  -7-3.06095 19.6949  19
   0   0  -8 10500.4 234.385   3
   0   0  -8 10401.8 237.801   4
   0   0  -9-2.55360 10.5770   4
   0   0  -9-3.69281 9.17742   3
   0   0  -9-8.93038 23.4179  19
   0   0 -10 12377.9 285.901   4
   0   0 -10 12777.9 281.061   3
   0   0 -11 5.90649 13.6094   4
   0   0 -11 11.0920 12.6339   3
   0   0 -12 16.3247 15.1386   4
   0   0 -12 30.9131 72.6916  31
   0   0 -13-30.0259 75.7232  31
   0   0 -13-10.8315 16.1165   4
   0   0 -13-11.8835 16.2701   2
   0   0 -14-1.49716 20.9889   9
   0   0 -14-19.2942 32.7685  26
   0   0 -14 41.5890 18.4139   2
   0   0 -14-28.1820 80.0725  31
   0   0 -15 10.8542 31.4370  26
   0   0 -15 180.877 84.6025  31
   0   0 -16 897.140 57.4754  26
   0   0 -16 920.719 110.476  31
   0   0 -17 229.276 82.8612  31
   0   0 -17-13.6360 29.8904  26
   0   0 -18-56.2258 74.6715  31
   0   0 -18-11.1543 27.1450  26
   0   0 -19 71.1227 70.0545  31
   0   0 -19-13.3366 24.7660  26
   0   0 -20 4.94000 21.5547  26
   0   0 -20-67.6758 59.1717  31
   0   0 -21 2.33902 13.1525   8
   0   0 -21 5.74422 45.6265  31
   0   0 -21 12.5386 18.1777  26
   0   1   0 6.90582 11.0473  18
   0   1   0-3.33292 11.8227  11
   0  -1   0 4.33410 7.82742  13
   0   1   0-3.60357 9.21527   5
   0   1  -1 3038.11 69.9873  18
   0   1  -1 3046.91 79.2248  11
   0   1  -1 2940.67 70.7673   6
   0   1   1 3090.69 74.2118  18
   0  -1  -1 2925.97 64.5749  12
   0   1  -1 2884.08 86.7358  16
   0  -1   2 1.70230 8.97064  20
   0  -1  -2 6.14709 8.05389  12
   0   1  -2 14.6454 21.2323  16
   0   1  -2 12.0182 9.22391  18
   0   1  -2 4.83655 14.5154  21
   0   1  -2 14.2456 14.5401  11
   0   1  -2 11.1401 8.00316   2
   0   1   2 10.3512 13.9216  18
   0   1  -2 10.5250 5.40010   9
   0   1  -2 6.53194 6.92733   1
   0   1  -3 538.801 19.4327   1
   0   1  -3 519.603 30.2749  11
   0   1  -3 447.759 23.2094  21
   0   1  -3 499.206 20.4892   2
   0   1   3 524.695 26.2295  18
   0   1  -3 620.967 36.8087  16
   0   1  -3 451.447 15.2524  15
   0  -1  -3 555.599 20.9041  12
   0   1  -4 13.4262 16.8620  11
   0   1  -4 8.82545 8.76113   2
   0   1   4 28.5757 16.7214  18
   0   1   4 26.8033 16.1347  17
   0  -1  -4 28.0340 12.1864  12
   0   1  -5 692.436 38.2263  11
   0   1  -5 780.327 28.7634   2
   0  -1  -5 782.243 30.0310  12
   0   1   5 736.295 34.5965  17
   0   1   5 717.306 32.9617  18
   0  -1  -6 7.68173 12.9091  12
   0   1   6 3.96033 17.4417  17
   0   1  -6 4.67491 9.02750   2
   0   1  -6 9.35725 18.4506  11
   0   1  -7 3135.49 85.7256   2
   0  -1  -7 3270.00 93.4503  19
   0   1   7 3356.98 94.4732  17
   0   1   8 34.1357 22.0924  17
   0   1  -8 29.2469 12.5105   2
   0  -1  -8 50.2062 20.8785  19
   0  -1  -8 50.8545 10.8349   3
   0  -1  -9 0.73649 8.99897   3
   0   1  -9 4.75506 11.2671   2
   0   1 -10 40.6587 15.2194   2
   0  -1 -10 31.8401 12.4689   3
   0  -1 -11 486.577 31.3673   4
   0  -1 -11 429.732 28.3586   3
   0   1 -11 462.994 32.9611   2
   0   1 -12 2.69763 30.0507  26
   0  -1 -12 46.8817 77.1851  31
   0   1 -12-54.6253 74.1824  31
   0  -1 -12 9.22503 14.5099   4
   0  -1 -12-1.15096 13.3860   3
   0   1 -12 7.25013 15.1900   2
   0  -1 -13 329.543 31.6128   4
   0   1 -13 325.633 32.1307   2
   0   1 -13 208.248 39.0850  26
   0  -1 -13 319.640 28.3577   3
   0  -1 -13 265.092 88.5988  31
   0   1 -14 111.041 83.3300  31
   0   1 -14 14.7923 19.1538   2
   0  -1 -14 38.7506 17.7711   3
   0   1 -14 40.5334 34.6941  26
   0  -1 -14 35.4417 19.3588   4
   0  -1 -14 16.5322 83.3884  31
   0   1 -15 33.7743 32.5116  26
   0   1 -15 32.8651 79.4388  31
   0  -1 -15 140.705 86.2973  31
   0   1 -16 53.2511 77.9780  31
   0   1 -16-15.9740 31.4619  26
   0  -1 -16 5.99030 29.6893  26
   0   1 -17 42.8453 80.6504  31
   0   1 -17 30.2963 30.5145  26
   0  -1 -17 8.67079 27.7998  26
   0   1 -18-8.16951 27.4705  26
   0  -1 -18 11.9431 26.2646  26
   0   1 -18-4.09461 16.8187   8
   0   1 -18-17.5110 71.8662  31
   0  -1 -18-40.0873 74.6687  31
   0   1 -19 11.8056 61.6570  31
   0   1 -19 25.2131 17.6915   8
   0  -1 -19 117.749 68.8602  31
   0  -1 -19 11.5183 24.0680  26
   0   1 -19 39.1121 25.5028  26
   0  -1 -20 13.1075 21.3362  26
   0   1 -20 29.8981 52.9875  31
   0  -1 -20 68.8255 57.5104  31
   0   1 -20-7.23929 20.0569  26
   0   1 -20-2.96652 14.1732   8
   0   1 -21 7.43479 12.0543   8
   0  -1 -21 44.1286 44.6744  31
   0   1 -21-12.7749 16.5010  26
   0  -1 -21 13.8615 17.6285  26
   0   2   0 3026.82 83.3345  18
   0   2   0 3050.81 89.1799   5
   0   2  -1 12.0715 15.0570   1
   0   2  -1 14.8657 17.7062  18
   0   2   1 10.0663 18.1435   5
   0   2   1 34.0516 18.1296  18
   0   2  -1 8.59428 18.0673   6
   0   2  -1 0.86185 17.5258   5
   0   2  -2 3455.29 91.3759   1
   0   2  -2 3312.61 88.3786   6
   0   2  -2 3152.71 85.8756  18
   0   2   2 3357.70 91.7494  18
   0   2  -2 3284.82 103.221  11
   0   2  -3 186.079 32.0477  11
   0   2  -3 209.985 20.5350   1
   0   2  -4 16060.1 397.104  16
   0   2  -4 16670.1 392.217  11
   0   2  -4 17693.4 368.368   1
   0   2   4 17388.9 376.720  18
   0   2   5 128.904 27.4254  18
   0   2  -5 54.2386 28.7851  11
   0   2  -5 57.5886 31.7491  16
   0   2  -5 78.5493 14.2165   1
   0  -2  -5 145.242 18.4781  12
   0   2  -5 93.8988 18.2082   2
   0   2   6 5811.97 148.412  18
   0   2  -6 5570.91 165.088  11
   0   2  -6 5431.90 138.834   2
   0   2  -6 5604.13 166.873  16
   0   2  -7 12.1916 23.4080  11
   0   2  -7 21.0248 27.9001  16
   0   2  -7 4.98502 11.9731   2
   0   2  -8 19.8272 24.1285  11
   0   2  -8 12.1783 13.8721   2
   0   2  -8 2.29522 28.1649  16
   0   2  -9 18.7976 13.5813   2
   0   2  -9-2.54315 30.8084  16
   0   2 -10 494.177 36.0112   2
   0   2 -10 420.567 53.9073  16
   0   2 -11-12.8238 17.3678   2
   0  -2 -11 3.27330 12.0130   3
   0   2 -11 18.9203 35.4422  16
   0   2  11-13.9596 97.4895  29
   0  -2 -12-1.22910 13.2446   3
   0   2 -12 8.97001 18.0121   2
   0   2 -13 30.5549 20.8593   8
   0  -2 -13 12.2724 15.7146   3
   0   2 -13 38.1018 23.1055   2
   0  -2 -13 19.7216 17.7319   4
   0   2 -14 4233.89 129.026   8
   0   2 -15-1.58320 20.9325   8
   0  -2 -16 334.656 39.0030  26
   0   2 -16 367.516 35.9481   8
   0   2 -17 1.47465 18.4744   8
   0  -2 -17 7.88070 26.3745  26
   0   2 -18 2.63607 16.8446   8
   0  -2 -18 4.67814 23.8899  26
   0  -2 -19 7.83774 22.4361  26
   0   2 -19-2.21777 16.5229   8
   0   2 -20 144.410 19.3909   8
   0  -2 -20 72.6333 20.1458  26
   0   3   0 3.00188 16.2624   1
   0   3   0-1.26174 19.1221   6
   0   3   0 5.58603 17.2085   5
   0   3   0 1.16436 18.9690  18
   0   3   1 39.7896 20.7375   5
   0   3  -1 22.5235 18.9037   6
   0   3  -1 22.5489 16.7119   1
   0   3  -1 46.5227 19.5981  18
   0   3   1 54.3451 20.4753  18
   0   3  -2 12.3000 18.6523   6
   0   3  -2 8.66436 13.2682   1
   0   3   2 34.4353 23.0530  18
   0   3   2 23.1322 20.3923   5
   0   3   3 2556.55 91.5662   5
   0   3   3 2413.03 86.3453  18
   0   3  -3 2574.49 81.4692   1
   0   3  -4 24.1058 12.5777   1
   0   3   4 63.5234 25.7934  18
   0   3   5 419.542 37.9540  18
   0   3  -5 499.899 30.7378   1
   0   3   6 57.5285 26.0260  18
   0   3  -6 62.8656 15.0017   1
   0   3   7 2275.03 91.1809  18
   0   3  -9 17.3384 25.8684  25
   0   3  -9 47.8841 21.6469   8
   0   3   9 90.6230 90.9388  29
   0   3  10-14.1659 95.4164  29
   0   3 -10 13.6110 21.8521   8
   0  -3 -10-8.55582 22.4717  22
   0  -3 -11 244.664 30.1604  22
   0   3 -11 310.368 32.4825   8
   0   3 -12 23.3442 23.8492   8
   0  -3 -12 13.2840 22.7877  22
   0   3  12 27.9383 112.557  29
   0   3  13 29.8949 112.830  29
   0   3 -13 111.910 26.5647   8
   0  -3 -13 95.9278 24.8035  22
   0   3  14 12.5391 121.435  29
   0   3 -14 29.5810 22.8190   8
   0   3  15 44.8234 120.257  29
   0   3 -15 242.487 31.0245   8
   0   3 -16 13.5192 19.4228   8
   0   3 -17 44.0985 20.7163   8
   0   3 -18 12.3365 16.3732   8
   0   3 -19-11.3800 14.3994   8
   0   4   0 5859.69 171.999   1
   0   4   0 5892.63 168.294   6
   0   4   1 74.8521 28.2916   5
   0   4  -1 73.9557 28.6246   6
   0   4   1 45.5381 29.4124   6
   0   4   1 52.0074 26.1626   1
   0   4  -1 51.4957 25.7246   1
   0   4  -2 461.370 40.4854   6
   0   4   2 503.958 48.4198   5
   0   4  -2 460.419 40.2179   1
   0   4   2 505.600 47.9103   6
   0   4   3 18.6337 26.4479   5
   0   4  -3 31.8840 19.1508   1
   0   4   4 408.148 47.2516   5
   0   4  -4 321.524 24.6995   7
   0   4  -4 389.956 32.8796   1
   0   4  -4 318.839 36.8688  25
   0   4  -5 8.78622 28.8526  25
   0   4  -5 34.7472 24.2149   8
   0   4  -5 36.8209 15.4764   7
   0   4  -5 55.5435 18.2028   1
   0   4   5 49.8705 82.5658  29
   0   4   5 58.5480 32.9410   5
   0   4   6 117.987 87.2359  29
   0   4   6 158.198 38.9031   5
   0   4  -6 108.699 27.4859   8
   0   4  -6 120.295 30.6320  25
   0   4  -6 128.811 21.6434   1
   0   4  -7 5.60021 22.5886   8
   0   4   7 77.7693 91.4356  29
   0   4  -7-9.54450 27.4877  25
   0   4   7 17.8234 30.3860   5
   0   4   8 224.797 96.6233  29
   0  -4  -8 206.334 30.4370  22
   0   4   8 205.068 46.7451   5
   0   4  -8 206.683 31.6816   8
   0   4  -8 200.113 35.0802  25
   0   4  -9 38.5362 30.3367  25
   0   4   9 72.8678 99.3833  29
   0  -4  -9 36.5405 26.1467  22
   0   4  -9 6.07205 23.5795   8
   0   4  10 992.138 130.862  29
   0   4 -10 1011.51 55.8020   8
   0  -4 -10 1075.20 52.9244  22
   0   4 -11 8.11530 24.3343   8
   0  -4 -11 65.6211 24.7578  22
   0   4  11 58.6431 108.735  29
   0   4 -12 201.612 32.4863   8
   0   4  12 87.6281 103.383  29
   0  -4 -12 130.430 25.7560  22
   0   4  13 5.51829 105.603  29
   0  -4 -13 26.4841 21.9183  22
   0   4 -13 27.4136 24.4445   8
   0   4  14 75.9420 106.131  29
   0  -4 -14 1.99742 18.5032  22
   0   4 -14 4.60140 21.2905   8
   0  -4 -15 6.05368 16.7804  22
   0   4  15 36.2147 100.715  29
   0   4 -15 19.6066 20.4450   8
   0   4  16 26.8035 31.8676  24
   0   4 -16 64.5881 21.0826   8
   0   4  16-14.2699 98.2022  29
   0   4  17 95.6384 94.2957  29
   0   4  17 19.0001 30.8293  24
   0   4 -17 32.0165 17.1139   8
   0   4  18 29.8876 28.8641  24
   0   4 -18 68.2729 15.3039   8
   0   5   0 6.38380 18.2285   7
   0   5   0 13.9418 21.8042   1
   0   5   0 10.5338 25.8523   6
   0   5   0 18.2933 29.5844  25
   0   5   1 532.330 48.9533   1
   0   5  -1 524.186 32.6098   7
   0   5  -1 442.710 43.1488  25
   0   5   1 526.788 49.8640   6
   0   5  -1 521.598 44.9001   1
   0   5   1 402.416 41.7298  25
   0   5   1 565.628 35.4065   7
   0   5   2-5.17214 30.9155  25
   0   5   2-13.6034 24.5864   1
   0   5   2-9.61878 19.9149   7
   0   5  -2 27.9747 29.4497  25
   0   5   2-4.21737 21.3052  15
   0   5   2-18.9619 29.2074   6
   0   5  -2 1.94762 15.6344   7
   0   5  -2-4.11309 16.5903   1
   0   5  -3 224.865 35.7975  25
   0   5   3 308.655 46.6054   1
   0   5  -3 225.850 23.1475   7
   0   5   3 177.717 39.4991   6
   0   5  -3 258.591 31.7966   1
   0   5  -4-6.52509 14.2834   7
   0   5   4-6.07632 32.1943   5
   0   5   4-8.14739 32.1752   6
   0   5  -4 10.0830 27.5090  25
   0   5  -5 17.0950 27.3796  25
   0   5  -6 20.8684 27.6435  25
   0   5   6-35.6518 86.4632  29
   0   5   7 137.975 89.5582  29
   0   5  -7 101.371 30.6723  25
   0  -5  -8 17.7498 22.9205  22
   0   5  -8 5.39201 27.3909  25
   0   5   8-14.1165 91.4493  29
   0   5   9 76.1827 92.8489  29
   0   5  -9 16.1781 27.0191  25
   0  -5  -9 28.0781 22.9715  22
   0  -5 -10 23.7784 20.7899  22
   0   5  10 114.005 92.0072  29
   0  -5 -11 9.61129 19.1134  22
   0   5  11 69.8475 90.8019  29
   0  -5 -12 18.5780 18.0851  22
   0   5  12-8.93820 88.0209  29
   0  -5 -13 15.5746 17.1818  22
   0   5  13-5.81855 26.1882  24
   0   5  13-20.9121 83.5845  29
   0   5  14-6.72395 24.0703  24
   0  -5 -14 30.1160 16.2222  22
   0   5  14 91.1806 81.0880  29
   0   5  15 26.3581 23.4081  24
   0   5  15 29.8909 73.0388  29
   0   5  16-2.01839 19.9417  24
   0   5  16-2.73744 64.1217  29
   0   6   0 11.4905 14.3615   7
   0   6   0 58.3969 27.6108  25
   0   6  -1 30.7636 26.5049  25
   0   6   1 8.66827 15.5794   7
   0   6   1 11.3230 25.3192  25
   0   6  -1 1.00344 14.0215   7
   0   6  -2 248.975 22.8789   7
   0   6  -2 235.376 35.0259  25
   0   6   2 276.724 26.4033   7
   0   6  -3 71.2607 29.1903  25
   0   6  -3 71.1492 16.9117   7
   0   6   3 66.4974 19.8166   7
   0   6  -4 1487.28 69.3469  25
   0   6   4 1684.51 63.3640   7
   0   6  -5 30.4681 26.8101  25
   0   6   5 18.3914 17.4697   7
   0   6   6 358.937 30.6111   7
   0   6  -6 306.309 36.3145  25
   0   6   7 6.08735 17.5604   7
   0   6  -7 32.4619 26.3099  25
   0   6   8-33.1760 71.5190  29
   0   6   8 15.2681 17.7019   7
   0   6   9-49.3337 71.3240  29
   0   6  10 16.4786 67.1153  29
   0  -6 -10 12.0424 14.9292  22
   0   6  11-69.1015 63.4165  29
   0   6  12 5.30590 56.7025  29
   0   6  12 15.0743 14.1731   7
   0   6  13 1.21693 11.4600   7
   0   6  13-8.97198 51.9253  29
   0   7   0 9.35560 11.6125   7
   0   7   1 20.5139 11.4762   7
   0   7  -1 27.0575 19.0654  25
   0   7   2 0.73727 11.3886   7
   0   7  -2 1.12133 17.8685  25
   0   7  -3 14.4401 18.4929  25
   0   7   3 36.7412 12.8460   7
   0   7   4 1.44337 11.5578   7
   0   7  -4-11.8915 18.9575  25
   0   7   5 21.5749 11.7202   7
   0   7  -5 14.5982 17.7116  25
   0   7   6 1.30566 11.0616   7
   0   7   7 5.98956 10.8892   7
   0   7   8-4.78014 10.2350   7
   0   7   9-6.30467 9.50411   7
  -1   0 -21-4.22602 17.6118  26
  -1   0 -21-0.70770 11.2489   8
  -1   0 -20 9.46357 14.2641   8
  -1   0 -20 8.64437 22.3683  26
  -1   0 -20 56.3036 56.3329  31
  -1   0 -19 172.733 68.1936  31
  -1   0 -19 21.5036 26.4227  26
  -1   0 -18 86.9534 74.8648  31
  -1   0 -18 175.236 33.6657  26
  -1   0 -17 60.1947 79.4269  31
  -1   0 -17 13.7329 30.6910  26
  -1   0 -16 253.114 91.9798  31
  -1   0 -16 408.525 44.3510  26
  -1   0 -15 41.1875 33.1470  26
  -1   0 -15-33.9358 88.0974  31
  -1   0 -14 10.4145 17.5397   2
  -1   0 -14 18.2698 32.9928  26
  -1   0 -14 98.8069 84.4815  31
  -1   0 -13 1.62417 16.6139   4
  -1   0 -13 38.9047 78.7374  31
  -1   0 -13-32.7320 31.3375  26
  -1   0 -12 43.0849 17.0410   4
  -1   0 -12 40.4061 29.9003  26
  -1   0 -12 90.2068 77.6624  31
  -1   0 -12 62.6878 34.0401  19
  -1   0 -11-2.50502 13.7174   4
  -1   0 -11 2.25093 30.0852  19
  -1   0 -10 14.0404 13.2555   4
  -1   0 -10 11.0665 11.8350   3
  -1   0 -10 29.2110 29.1018  19
  -1   0  -9 28.0457 22.6713  19
  -1   0  -9 3.14752 9.61479   3
  -1   0  -9 0.90683 10.3458   4
  -1   0  -9 0.87884 14.3864  12
  -1   0  -8 1684.57 69.2274  19
  -1   0  -8 1773.13 54.3168   3
  -1   0  -8 1772.61 56.8661   4
  -1   0  -8 1670.94 56.5943  12
  -1   0  -7 0.55925 8.33320   3
  -1   0  -7-5.10731 9.06480   4
  -1   0  -7 14.7962 13.0265  12
  -1   0  -7 5.93398 18.5276  19
  -1   0  -6 5630.50 125.584   4
  -1   0  -6 5416.61 124.276   3
  -1   0  -6 5336.97 127.369  12
  -1   0  -5 8.05148 13.8074  12
  -1   0  -5 4.74391 17.9517  19
  -1   0  -5 2.81379 8.22377   4
  -1   0  -5 2.17747 7.17142   3
  -1   0  -4 3640.83 94.0372  19
  -1   0  -4 3634.70 82.7217   3
  -1   0  -3 8.33041 5.90997   3
  -1   0  -3 36.5320 15.7485  19
  -1   0  -2 6133.98 128.095   3
  -1   0  -2 6193.28 137.089  19
  -1   0  -1-0.52025 7.56032  14
  -1   0  -1 1.30839 2.16703   3
  -1   0  -1 0.76532 2.44908   4
   1   0   0 10.6882 10.8210  20
  -1   0   0 1.46569 6.47786  14
   1   0  -1-3.11844 12.2854  20
   1   0  -1 1.77619 2.10848   3
   1   0  -1 0.14545 2.38670   4
   1   0  -2 5650.27 130.731  13
  -1   0   2 5697.57 126.020  21
   1   0  -2 5808.79 125.539   9
   1   0  -2 5854.62 125.521  16
   1   0  -2 5807.98 120.662   3
   1   0  -3 30.7702 10.1159   9
   1   0  -3 7.80455 5.48654   3
   1   0  -3 20.9206 11.0894  10
  -1   0   4 3265.80 83.0881  17
   1   0  -4 3397.81 81.2520   9
   1   0  -4 3427.77 78.1473   3
   1   0  -4 3523.06 79.0293   4
   1   0  -4 3675.05 87.7030  10
   1   0  -5 0.37621 7.36097   4
   1   0  -5 4.07851 6.59446   3
   1   0  -5 4.49653 10.7870   9
  -1   0   5 7.70787 13.5260  17
  -1   0   6 4749.30 120.101  17
   1   0  -6 5051.60 115.770   9
   1   0  -6 4821.42 112.519   3
   1   0  -6 4891.55 113.318   4
   1   0  -7 0.59225 8.72291   4
  -1   0   7 13.4366 16.0428  17
   1   0  -7 0.63130 10.6493   9
   1   0  -7 1.55486 7.61109   3
   1   0  -8 1637.40 53.2145   9
   1   0  -8 1556.61 49.5197   3
   1   0  -8 1614.91 52.1921   4
  -1   0   8 1659.79 61.2968  17
   1   0  -9 9.45696 9.11356   3
   1   0  -9-7.69626 13.5580   9
   1   0  -9-8.39986 10.2195   4
   1   0 -10 15.0307 12.2992   4
   1   0 -10 11.0979 10.2550   3
   1   0 -10 21.6174 16.2399   9
   1   0 -11 4.47455 16.8113   9
   1   0 -11-1.16570 12.5613   4
   1   0 -12 12.8506 18.9347   9
   1   0 -12 29.5421 16.1338   4
   1   0 -13 11.4114 19.1330   9
   1   0 -13-5.86154 15.1711   2
   1   0 -13-66.9804 76.9349  31
   1   0 -13 6.11174 16.3739   4
   1   0 -13 15.5886 50.4996  34
   1   0 -14 4.92569 15.7379   2
   1   0 -14-52.0805 79.5495  31
   1   0 -14 7.77234 20.6277   9
   1   0 -15-134.261 82.6790  31
   1   0 -16 389.766 93.8802  31
   1   0 -16 402.084 41.9231  26
   1   0 -17 5.79311 28.5717  26
   1   0 -17 32.7039 75.8784  31
   1   0 -18 147.090 29.8376  26
   1   0 -18 71.0532 71.4919  31
   1   0 -19 3.43692 23.7921  26
   1   0 -19-6.44018 67.9527  31
   1   0 -20 20.5099 15.3721   8
   1   0 -20 30.5786 21.4809  26
   1   0 -21 7.48258 17.0803  26
   1   0 -21 13.4851 13.0854   8
   1   0 -21 37.6881 46.4419  31
  -1  -1 -21-3.86787 11.4683   8
  -1   1 -21-6.73472 11.4373   8
  -1   1 -21-12.8159 16.6489  26
  -1  -1 -21-3.75843 16.4889  26
  -1  -1 -20 19.2837 21.0300  26
  -1   1 -20-2.74106 20.3591  26
  -1   1 -20 26.2496 14.7919   8
  -1   1 -19 19.8914 16.7231   8
  -1   1 -19 42.0710 60.6131  31
  -1  -1 -19 83.0048 65.1065  31
  -1   1 -19 17.5737 25.0083  26
  -1  -1 -19 6.60605 23.9262  26
  -1  -1 -18 77.7411 72.9540  31
  -1  -1 -18 43.7352 26.9990  26
  -1   1 -18 15.3713 28.5536  26
  -1   1 -18 131.438 73.3316  31
  -1   1 -18 32.6078 19.7874   8
  -1   1 -17 75.9186 76.9607  31
  -1  -1 -17 67.5334 79.7865  31
  -1  -1 -17 87.8322 30.3640  26
  -1   1 -17 75.3240 34.6839  26
  -1   1 -16 109.978 38.1446  26
  -1   1 -16 169.736 86.8911  31
  -1  -1 -16 182.283 91.5173  31
  -1  -1 -16 114.098 33.3975  26
  -1   1 -15 57.3394 36.9424  26
  -1   1 -15-102.527 90.1882  31
  -1  -1 -15 17.7910 29.6322  26
  -1  -1 -15-4.32596 87.2788  31
  -1   1 -14 55.7469 36.7189  26
  -1  -1 -14 12.8783 31.0521  26
  -1  -1 -14 29.2282 20.4655   4
  -1  -1 -13 154.510 24.2827   4
  -1  -1 -13 81.9387 31.3247  26
  -1  -1 -13 138.827 22.0663   3
  -1   1 -13 125.983 25.4190   2
  -1   1 -13 123.485 38.2172  26
  -1   1 -13 132.723 81.0937  31
  -1  -1 -12 245.807 24.6550   3
  -1  -1 -12 359.908 91.0753  31
  -1  -1 -12 248.881 26.3555   4
  -1   1 -12 289.194 39.6285  26
  -1   1 -12 271.124 30.2473   2
  -1  -1 -11 6.45105 27.5890  19
  -1  -1 -11 7.29110 12.2848   3
  -1   1 -11 10.8578 15.7853   2
  -1  -1 -11 6.86395 12.3284   4
  -1  -1 -10 470.751 27.8226   3
  -1  -1 -10 431.267 41.9590  19
  -1   1 -10 459.388 31.6414   2
  -1  -1  -9 462.933 25.9192   3
  -1  -1  -9 454.060 31.7808  12
  -1   1  -9 476.419 29.7068   2
  -1  -1  -9 495.626 39.7408  19
  -1   1  -8 589.240 45.7815  19
  -1  -1  -8 669.633 29.3240   3
  -1  -1  -8 683.971 42.0842  19
  -1   1  -8 688.502 32.8789   2
  -1  -1  -8 661.378 35.5144  12
  -1   1  -7 96.8885 27.0719  19
  -1   1  -7 83.8497 14.2194   2
  -1  -1  -7 135.846 19.0726  12
  -1  -1  -7 102.692 22.7328  19
  -1   1  -6 3650.53 96.4278  14
  -1  -1  -6 3959.72 97.2976  12
  -1   1  -6 3713.99 93.7883   2
   1   1   5 477.440 24.7393  15
  -1   1  -5 483.817 21.4451  12
  -1  -1  -5 584.739 27.8288  12
  -1   1  -5 510.985 23.1057   2
  -1   1  -5 498.846 36.5245  19
  -1   1  -4 6797.08 147.503   2
  -1   1  -4 6433.93 142.685  12
   1   1   4 6534.87 149.438  15
  -1   1  -4 6741.48 162.929  19
   1   1   3 621.694 26.6378  15
  -1   1  -3 653.504 22.3157   1
  -1   1  -3 629.707 21.5726  12
  -1   1  -3 564.750 23.4787   2
   1   1   2 3513.63 83.1809  15
  -1   1  -2 3345.06 78.2127   1
   1  -1   2 3254.00 87.1335  20
  -1   1  -1 197.522 13.5194   1
  -1   1  -1 240.475 24.6463  16
   1  -1   1 208.476 23.1068  20
  -1   1  -1 206.761 21.4463  21
  -1   1  -1 203.655 14.0422   6
   1   1   1 204.285 15.5235  15
   1  -1   0 130.935 22.5047  20
  -1   1   0 58.6564 24.6119  16
   1   1   0 7.44220 11.9615   5
   1   1   0 32.7186 10.1542  15
  -1   1   0 107.790 23.7324  21
  -1   1   0 71.5045 10.3518  17
  -1   1   0 15.5763 12.1433   5
   1   1  -1 190.684 13.5647  15
   1  -1  -1 222.434 21.6533  13
   1  -1  -1 182.119 11.4336   9
   1   1  -1 177.038 13.7310   6
  -1   1   1 211.361 27.7080  21
  -1   1   1 226.368 13.7624  17
   1   1  -1 176.561 13.6988   1
   1   1  -2 3363.62 81.9884   1
   1  -1  -2 3812.01 96.1645  13
   1  -1  -2 3559.44 80.4983   9
   1   1  -2 3566.46 85.8697   2
  -1   1   2 3745.55 84.2219  17
   1   1  -3 675.187 23.1966   1
   1  -1  -3 637.559 23.7765   9
   1  -1  -3 678.336 35.0116  13
  -1   1   3 717.112 27.9760  17
   1   1  -3 641.312 25.6905   2
   1   1  -4 7520.92 180.442  16
  -1   1   4 7021.04 159.865  17
   1   1  -4 6873.32 155.291   9
   1   1  -4 7271.91 174.182  11
   1   1  -4 7151.94 157.484   2
  -1   1   5 467.462 26.7224  17
   1   1  -5 467.932 32.9612  11
   1   1  -5 435.582 21.3136   9
   1   1  -5 472.242 22.5462   2
   1   1  -5 484.630 39.5201  16
   1   1  -6 3940.69 96.0654   2
  -1   1   6 4020.01 102.015  17
   1   1  -6 3674.76 93.2668   9
   1   1  -6 3950.13 118.995  16
   1   1  -6 3742.31 112.725  11
   1   1  -7 58.6467 22.3280  11
   1   1  -7 81.0144 12.8875   2
   1   1  -7 77.1182 13.7827   9
  -1   1   7 90.5708 19.3947  17
   1   1  -8 694.918 32.1628   2
   1   1  -8 627.630 30.0329   9
   1  -1  -8 635.951 28.0836   3
  -1   1   8 621.564 38.9787  17
   1   1  -9 458.936 28.3214   2
   1   1  -9 416.638 26.4762   9
   1  -1  -9 450.791 24.8332   3
  -1   1   9 488.824 37.2404  17
   1  -1 -10 431.410 26.0322   3
  -1   1  10 426.202 40.0347  17
   1   1 -10 391.608 27.2083   9
   1   1 -10 399.774 28.8573   2
   1   1 -11-8.67639 13.3577   2
   1  -1 -11 1.10850 12.7095   4
   1  -1 -11-1.23246 18.2063   9
   1  -1 -11-18.1704 12.9023   3
   1  -1 -12 273.980 25.0574   3
   1  -1 -12 291.942 30.8775   9
   1  -1 -12 284.701 27.4734   4
   1   1 -12 255.814 26.8970   2
   1  -1 -13 121.790 27.4964   9
   1  -1 -13 151.335 23.2200   4
   1   1 -13 29.3657 50.5828  34
   1   1 -13 126.491 23.7354   2
   1  -1 -13 53.4452 79.0853  31
   1  -1 -13 125.553 21.4367   3
   1  -1 -14-16.2746 80.6616  31
   1  -1 -14 33.9157 20.0112   4
   1   1 -14-47.4974 81.3476  31
   1   1 -14 112.149 57.9036  34
   1  -1 -15-8.42576 79.3497  31
   1   1 -15 102.369 57.0222  34
   1   1 -15-41.0088 78.3437  31
   1   1 -16 196.111 83.1374  31
   1  -1 -16 130.240 82.1275  31
   1  -1 -17 77.1313 30.4466  26
   1  -1 -17 120.029 78.4283  31
   1   1 -17 89.2177 75.7864  31
   1  -1 -18 68.6093 70.0683  31
   1   1 -18 55.6859 68.2170  31
   1  -1 -18 27.3941 26.4654  26
   1   1 -18 70.8069 20.2314   8
   1  -1 -19 10.1454 23.3085  26
   1   1 -19 35.7094 17.5571   8
   1  -1 -19-6.13214 64.0511  31
   1  -1 -20 10.9512 21.1035  26
   1  -1 -20-4.84173 54.6931  31
   1   1 -20 24.9318 52.4084  31
   1   1 -20 16.0762 14.3345   8
   1  -1 -21 10.0744 16.5872  26
   1   1 -21 1.40325 11.2926   8
   1  -1 -21 1.39251 11.3160   8
  -1   2 -20-3.24558 13.1232   8
  -1   2 -19 20.4990 16.2621   8
  -1   2 -19 0.97761 22.1705  26
  -1   2 -18 17.0921 18.6698   8
  -1   2 -18 1.23626 26.0894  26
  -1   2 -17 22.4901 21.4915   8
  -1   2 -17-7.27603 29.3603  26
  -1   2 -16-1.61062 32.1364  26
  -1   2 -16 6.46091 21.7424   8
  -1   2 -15 8.43882 34.5838  26
  -1   2 -15 28.1322 22.2014   8
  -1   2 -14 13.0022 21.4895   8
  -1   2 -14-5.05935 37.0382  26
  -1   2 -13 203.301 52.1574  16
  -1  -2 -13 281.933 30.3809   4
  -1   2 -13 323.941 33.7658   8
  -1   2 -13 192.726 41.8626  26
  -1   2 -12 1.50840 35.1708  26
  -1   2 -12 32.8137 23.1351   8
  -1   2 -12 17.4319 20.9905   2
  -1  -2 -12 24.6548 14.0710   3
  -1   2 -12 25.2354 37.3259  16
  -1  -2 -11 9.88311 12.4099   3
  -1   2 -11 42.6412 20.3936   2
  -1   2 -11 16.3933 35.3320  16
  -1   2 -11 17.8081 31.8272  26
  -1   2 -10 27.0713 18.1398   2
  -1  -2 -10-7.93061 25.7317  19
  -1   2 -10-8.86292 31.8353  16
  -1  -2 -10 6.80477 11.5704   3
  -1  -2  -9 889.821 55.3321  19
  -1   2  -9 950.346 48.7357   2
  -1  -2  -9 912.633 45.4777  12
  -1   2  -9 924.048 67.7287  16
  -1   2  -8 881.155 43.0341   2
  -1  -2  -8 818.594 40.9259  12
  -1   2  -8 939.784 63.2708  16
  -1  -2  -7 279.160 24.6679  12
  -1   2  -7 244.849 37.7868  16
  -1   2  -7 269.519 23.7778   2
  -1  -2  -6 1023.85 41.1699  12
  -1   2  -6 973.193 41.9218   2
  -1   2  -6 1000.64 60.2607  16
  -1   2  -5 498.417 42.6237  16
  -1  -2  -5 514.356 27.9178  12
  -1   2  -5 416.121 33.0834  21
  -1   2  -5 531.426 26.2189   1
  -1   2  -4 1457.16 46.6662   1
  -1   2  -4 1321.89 55.4478  21
  -1   2  -4 1441.29 67.8044  16
  -1  -2  -4 1481.06 46.8247  12
  -1   2  -3 1573.38 61.4879  21
  -1   2  -3 1725.26 52.9260   1
  -1   2  -3 1538.01 70.6885  16
  -1   2  -2 1378.47 49.6472  18
  -1   2  -2 1309.74 65.8074  16
  -1   2  -2 1293.08 46.2148   6
  -1   2  -2 1331.57 56.4670  21
  -1   2  -2 1322.00 46.5140   1
  -1   2  -1 61.1658 16.4117   1
  -1   2  -1 79.7248 21.4076  18
   1   2   1 47.4475 20.5024   5
  -1   2  -1 55.2435 18.4567   6
  -1   2  -1 50.8543 27.9207  21
   1   2   0 27.2877 14.2882  15
   1   2   0 10.8477 16.5657  11
  -1   2   0 49.9319 22.4163  18
  -1   2   0 2.63107 17.9471   5
   1  -2   0 32.5878 19.5943  13
   1   2   0 12.7767 18.0777   5
  -1   2   1 39.6646 19.3549   5
   1  -2  -1 64.6967 20.9011  13
  -1   2   1 97.5589 23.5610  18
   1   2  -1 89.6990 16.0051  15
   1   2  -1 55.7310 20.6579   6
   1   2  -1 92.7277 21.2819  11
   1   2  -1 76.9478 18.0788   1
   1  -2  -2 1285.35 53.5329  13
   1   2  -2 1236.84 56.3282  11
   1   2  -2 1252.16 46.6424   6
   1   2  -2 1278.50 47.5066   1
   1   2  -2 1288.71 43.9217  15
   1   2  -3 1797.68 56.8321   1
   1   2  -3 1669.84 70.5184  11
   1   2  -4 1490.65 48.9181   1
  -1   2   4 1369.13 51.4375  17
   1   2  -4 1436.38 67.0227  11
   1   2  -5 703.670 48.0846  11
   1   2  -5 654.451 30.1629   1
  -1   2   5 666.826 42.9061  18
  -1   2   5 604.710 33.8799  17
   1   2  -6 957.728 41.8440   2
   1   2  -6 908.173 59.4162  11
  -1   2   6 1028.69 53.8856  18
  -1   2   6 933.918 43.9630  17
   1   2  -7 297.775 24.8712   2
  -1   2   7 322.666 29.3438  17
   1   2  -7 287.094 38.5983  11
   1   2  -8 817.768 41.4142   2
   1   2  -8 784.393 64.2228  16
   1   2  -8 732.501 57.8601  11
   1   2  -9 877.905 65.1850  11
   1   2  -9 902.765 45.6016   2
   1  -2 -10-1.97741 10.8282   3
   1  -2 -10-3.45150 16.6938   9
   1   2 -10 11.1852 16.2604   2
   1  -2 -11 30.1744 14.7334   3
   1   2 -11 29.7287 17.8597   2
   1  -2 -11 24.6023 20.1168   9
   1  -2 -12 28.7430 20.0840   9
   1  -2 -12 18.8547 14.9642   3
   1   2 -12 19.3662 19.1824   2
   1   2 -12 9.08520 19.0065   8
   1  -2 -13 334.154 30.7534   3
   1  -2 -13 312.607 32.0550   4
   1   2 -13 286.363 32.3475   8
   1  -2 -13 340.745 37.3583   9
   1   2 -13 309.261 35.2389   2
   1   2 -14 11.7708 21.0896   8
  -1   2  14-103.264 125.430  29
   1   2 -15 24.0662 21.0894   8
  -1   2  15-62.8519 133.176  29
   1   2 -16 34.0509 20.8988   8
   1   2 -17 26.4470 19.3286   8
   1   2 -18-4.96862 17.4695   8
   1  -2 -18-10.6303 24.6385  26
   1   2 -19 18.7706 14.8119   8
   1  -2 -19 20.7536 21.6215  26
   1  -2 -20-1.53088 18.0547  26
   1   2 -20 10.5071 13.1995   8
  -1   3 -19 0.83226 13.5586   8
  -1   3 -18 19.8714 16.9663   8
  -1   3 -17-1.34586 18.3697   8
  -1   3 -16 27.6913 21.9197   8
  -1   3 -15 31.6157 22.4862   8
  -1   3 -14 22.3120 22.1945   8
  -1   3 -13 224.504 33.7094   8
  -1  -3 -13 165.310 26.4953  22
  -1   3 -12 19.5936 24.1974   8
  -1  -3 -12 40.0304 22.6426  22
   1   3  12 63.2809 119.473  29
  -1  -3 -11 118.662 25.2615  22
   1   3  11 210.636 117.059  29
  -1  -3 -11 116.204 20.2655   3
  -1   3 -11 117.951 26.7431   8
  -1   3 -11 103.769 49.2371  16
  -1   3 -10 84.9830 24.8446   8
  -1  -3 -10 77.1456 25.4364  22
   1   3  10 85.4811 102.569  29
  -1   3 -10 103.863 42.5593  16
  -1   3  -9 569.897 38.8039   8
  -1  -3  -9 501.575 35.9165  22
   1   3   9 475.934 113.644  29
  -1   3  -9 516.747 41.4408  25
  -1   3  -9 442.120 59.2488  16
  -1  -3  -8 1224.00 51.5682  22
  -1   3  -8 1166.70 54.1607   8
  -1   3  -8 1059.69 79.3846  16
   1   3   7 101.555 25.1176  15
  -1   3  -7 111.358 40.0531  16
   1   3   6 16.8849 18.3518  15
  -1   3  -6 6.54090 12.4394   1
  -1   3  -6 38.3371 32.8828  16
  -1   3  -5 1028.79 44.4995   1
  -1   3  -4 311.654 25.3068   1
  -1   3  -3 35.1129 13.3658   1
   1   3   3 25.9095 21.8074   5
  -1   3  -2 416.135 30.1983   1
  -1   3  -2 386.112 30.2108   6
   1   3   2 443.384 37.1050   5
   1   3   1 1437.63 56.8260  15
  -1   3  -1 1241.75 54.3405  18
  -1   3  -1 1291.43 55.2300   6
   1   3   1 1531.39 64.9948   5
  -1   3  -1 1250.10 56.6017   1
   1   3   0 29.2208 19.8940   5
   1   3   0 49.0498 18.3811  15
  -1   3   0 62.8243 22.8826   6
   1   3   0 48.4536 21.0589   1
   1   3   0 40.6633 22.4408   6
  -1   3   0 21.6546 18.0472   5
  -1   3   0 63.1173 20.9897  18
  -1   3   0 57.0666 21.5700   1
   1   3  -1 1309.64 53.5147  15
  -1   3   1 1349.95 58.5170  18
   1   3  -1 1479.08 60.5787   6
   1   3  -1 1414.21 60.3195   1
  -1   3   1 1443.47 63.4800   5
  -1   3   2 376.629 33.2703  18
   1   3  -2 325.081 37.7292  11
   1   3  -2 419.548 32.4494   6
  -1   3   2 333.311 34.5600   5
   1   3  -2 394.252 30.9716   1
   1   3  -3 24.9754 14.6634   1
  -1   3   3 23.7459 23.2349   5
   1   3  -3 6.54879 23.3982  11
  -1   3   3 38.8988 21.6569  18
  -1   3   4 364.743 35.1172  18
   1   3  -4 357.783 43.8048  11
   1   3  -4 423.901 28.9530   1
   1   3  -5 933.084 66.4271  11
  -1   3   5 894.561 53.4885  18
   1   3  -6 1.16739 11.7210   1
   1   3  -6 17.5156 29.1238  11
  -1   3   6 5.35634 22.4588  18
   1   3  -7 117.168 36.2472  11
  -1   3   7 169.663 32.2097  18
   1   3  -8 1242.98 59.7931  25
   1   3  -8 1276.52 86.1548  11
   1   3  -8 1117.70 51.4125   8
   1   3  -9 637.102 67.0160  11
  -1   3   9 543.812 98.0616  29
   1   3  -9 549.763 38.6677   8
   1   3 -10 66.8628 23.8231   8
  -1   3  10 22.6224 87.9400  29
   1   3 -11 109.361 26.3047   8
  -1   3  11 84.2299 99.9863  29
   1   3 -12 1.49256 21.1928   8
  -1   3  12 43.0585 102.099  29
   1   3 -13 200.168 28.7544   8
  -1   3  13 149.963 109.068  29
   1  -3 -13 122.971 26.1944  22
   1   3 -14-3.09315 20.4484   8
  -1   3  14 6.05576 107.291  29
  -1   3  15-61.9611 118.368  29
   1   3 -15 31.5119 21.3811   8
  -1   3  16 73.6099 117.797  29
   1   3 -16 25.1357 19.2621   8
  -1   3  17 93.2355 118.667  29
   1   3 -17-1.23729 17.0604   8
   1   3 -18 2.07002 14.7425   8
   1   3 -19-6.42206 12.8887   8
   1   4  17 29.6929 31.0848  24
  -1   4 -17 19.6137 15.7506   8
   1   4  16-1.77356 32.4286  24
  -1   4 -16 10.9987 17.8402   8
   1   4  15 23.0203 34.1260  24
   1   4  15-15.3648 101.533  29
  -1   4 -15 2.84912 19.2437   8
   1   4  14 6.01344 33.3570  24
   1   4  14-5.45969 106.286  29
  -1   4 -14 26.7519 22.8369   8
  -1   4 -13 11.6302 23.2150   8
   1   4  13 50.7057 106.493  29
  -1  -4 -13 3.19937 18.6244  22
  -1  -4 -12 41.1937 22.5663  22
   1   4  12 79.3060 106.120  29
  -1   4 -12 79.4213 27.1540   8
  -1  -4 -11 69.1172 23.6134  22
  -1   4 -11 35.0522 25.6011   8
  -1  -4 -10 69.1217 25.6871  22
  -1   4 -10 48.4412 25.4287   8
   1   4   9 21.3249 32.8361   5
  -1  -4  -9 56.9415 25.7237  22
  -1   4  -9 31.1174 28.7894  25
   1   4   9 72.7943 100.541  29
  -1   4  -9 32.3921 25.5003   8
  -1   4  -8 45.8447 28.1310  25
   1   4   8 20.4699 33.5323   5
   1   4   8 89.3081 101.661  29
  -1   4  -8 33.7261 25.2398   8
  -1  -4  -8 35.7803 26.2034  22
   1   4   7 123.069 29.2426  15
   1   4   7 100.841 38.4341   5
   1   4   7 61.3609 97.0316  29
  -1  -4  -7 98.7338 25.9834  22
  -1   4  -7 134.112 31.0267  25
  -1   4  -7 125.719 27.2927   8
  -1   4  -6 47.0760 27.4209  25
  -1  -4  -6 67.2500 26.3603  22
   1   4   6 42.8641 31.4615   5
   1   4   6-8.97470 90.8215  29
  -1   4  -6 34.1102 15.3790   1
  -1   4  -6 71.0992 25.2812   8
   1   4   6 23.2881 23.6907  15
   1   4   5 142.583 29.1008  15
  -1   4  -5 120.056 27.2490   8
  -1   4  -5 184.342 23.7039   1
  -1   4  -5 106.945 30.4387  25
  -1   4  -5 133.549 17.9409   7
   1   4   5 145.190 35.5875   5
   1   4   4 284.908 35.0095  15
  -1   4  -4 266.231 27.2092   1
  -1   4  -4 265.530 34.3114  25
  -1   4  -4 290.823 22.4245   7
   1   4   4 341.840 97.8926  29
   1   4   4 259.560 41.2097   5
   1   4   3 1.82847 19.0446  15
  -1   4  -3-4.21294 26.0674  25
  -1   4  -3 33.9752 16.0858   1
  -1   4  -3 16.9084 15.0148   7
   1   4   3-2.28760 23.5438   5
   1   4   2 31.6060 20.1469  15
   1   4   2 45.4292 26.8931   5
   1   4   2 27.7350 25.0556   1
  -1   4  -2 42.0583 21.6121   6
   1   4   2 50.4015 28.3100   6
  -1   4  -2 49.5690 17.9215   1
  -1   4  -1 362.912 34.2909   1
   1   4   1 370.528 39.3272   1
  -1   4  -1 331.145 34.1500   6
   1   4   1 342.084 38.5797   6
   1   4   1 348.811 38.7832   5
   1   4   1 345.172 34.9052  15
   1   4   0 12.1080 22.1968   6
   1   4   0 27.7498 19.6064  15
   1   4   0 25.7611 22.2771   1
  -1   4   0 42.3377 25.7409   6
  -1   4   0 20.8475 21.5153  18
  -1   4   0 15.4827 20.2790   1
  -1   4   1 338.627 39.4585   1
   1   4  -1 371.150 37.0808   6
  -1   4   1 369.541 39.0086   6
  -1   4   1 274.576 33.5500  18
  -1   4   1 338.820 38.8847   5
   1   4  -1 360.610 35.1560   1
  -1   4   2 33.7129 23.3800  18
  -1   4   2 10.0592 27.5585   6
   1   4  -2 45.4372 19.6487   1
  -1   4   2-2.22613 25.1519   5
  -1   4   3 53.0536 33.6583  25
   1   4  -3 30.4958 16.6692   7
   1   4  -3 31.2950 17.8594   1
  -1   4   3 43.1554 25.6193  18
  -1   4   3 29.3466 29.7611   5
   1   4  -4 245.555 34.2742  25
   1   4  -4 307.560 29.5589   1
   1   4  -4 255.526 22.7837   7
  -1   4   4 193.319 34.3892  18
  -1   4   4 296.349 46.3455   5
   1   4  -5 132.572 31.8868  25
   1   4  -5 154.616 20.1626   7
  -1   4   5 146.715 33.1621  18
   1   4  -5 188.786 24.4222   1
   1   4  -5 104.769 28.6985   8
  -1   4   5 187.250 44.2000   5
   1   4  -6 67.0782 30.0969  25
  -1   4   6 47.8239 29.6843  18
   1   4  -6 43.4352 25.5895   8
   1   4  -6 47.8966 17.4211   1
  -1   4   6 50.5109 35.6750   5
  -1   4   7 124.741 35.7899  18
   1   4  -7 89.1530 32.4524  25
   1   4  -7 135.198 29.8318   8
  -1   4   7 168.096 87.2944  29
  -1   4   7 144.118 44.7039   5
   1   4  -8 32.0319 30.4345  25
  -1   4   8 100.442 89.0734  29
   1   4  -8 40.8150 25.6855   8
  -1   4   8 53.3574 32.8886  18
  -1   4   8 70.2743 41.8279   5
  -1   4   9-50.9270 91.3366  29
   1   4  -9 35.9462 23.5759   8
  -1   4   9 54.5737 44.0783   5
  -1   4  10 87.7103 98.4722  29
   1   4 -10 59.8326 25.3226   8
   1  -4 -11 73.0406 24.8231  22
  -1   4  11 106.452 98.8566  29
   1   4 -11 51.3419 24.7625   8
   1  -4 -12 10.6136 21.6488  22
  -1   4  12 15.5851 93.8943  29
   1   4 -12 34.1134 23.5688   8
   1  -4 -13-13.2887 20.7819  22
   1   4 -13 22.6129 22.2033   8
  -1   4  14 20.4345 98.1073  29
   1  -4 -14 51.0079 20.7646  22
   1   4 -14 51.1003 22.7549   8
   1  -4 -15-2.58563 17.0311  22
  -1   4  15 14.5626 94.4980  29
   1   4 -15 17.9961 19.5893   8
  -1   4  16-8.90115 93.9194  29
   1   4 -16-5.55567 15.8768   8
  -1   4  17-31.1293 86.9147  29
   1   4 -17 4.53121 13.7726   8
  -1   4  18-9.47806 23.6398  24
  -1   4  18 6.27619 76.1929  29
   1   5  16-14.3691 21.9385  24
   1   5  15 11.0429 23.6852  24
   1   5  15 6.56799 73.4469  29
   1   5  14 9.69084 26.3542  24
   1   5  14-57.1673 82.2486  29
   1   5  13 37.6192 27.6823  24
   1   5  13 63.5584 86.0256  29
   1   5  12-50.2242 89.1879  29
   1   5  12 57.1962 28.6180  24
   1   5  11-19.6302 27.8408  24
  -1  -5 -11 10.4308 19.5749  22
   1   5  11-57.5411 90.4742  29
   1   5  10 6.60370 28.1620  24
  -1  -5 -10 25.6137 20.5207  22
   1   5  10 39.4381 93.5147  29
  -1   5  -9 23.5690 25.9378  25
  -1  -5  -9 20.8513 21.2640  22
   1   5   9 54.7797 95.3009  29
   1   5   9 1.63735 26.0934  24
  -1   5  -8 11.8387 25.3449  25
  -1  -5  -8 5.88663 21.4855  22
  -1   5  -7 3.37879 25.8156  25
   1   5   7-39.0931 95.4490  29
  -1   5  -6-18.4886 26.9186  25
   1   5   6 81.1518 92.9298  29
  -1   5  -5 93.3958 31.6905  25
   1   5   5 78.8044 93.3955  29
  -1   5  -4 138.892 31.9066  25
  -1   5  -4 156.695 20.1896   7
   1   5   4 130.219 38.0654   6
   1   5   4 177.328 38.4917   5
   1   5   3 29.9964 25.0046  15
  -1   5  -3 18.2261 27.4478  25
  -1   5  -3 17.5996 15.4560   7
   1   5   3 36.2334 28.6217   6
   1   5   2-17.8387 23.8958  15
   1   5   2 18.3819 27.8267   1
  -1   5  -2 8.37264 27.6712  25
  -1   5  -2-12.4952 14.9267   7
   1   5   2 1.15753 18.1652   7
   1   5   2-2.28756 26.8542   6
  -1   5  -2-4.06819 16.7279   1
  -1   5  -1 22.0756 28.0079  25
   1   5   1 37.3269 24.0317   1
   1   5   1 30.8424 18.4328   7
  -1   5  -1 54.2668 18.2179   7
  -1   5  -1 55.4000 22.9760   1
   1   5   1 43.3664 27.3975   6
  -1   5   0-24.3694 30.8402  25
   1   5   0 4.19611 16.7592   7
  -1   5   0-21.2260 25.7131   6
  -1   5   0-11.6892 17.3131   7
   1   5   0-6.88671 21.0671   1
  -1   5   0-4.67782 20.4660   1
   1   5   0-14.5488 25.1777   6
  -1   5   1 46.5824 30.6357  25
  -1   5   1 45.6735 19.8294   7
  -1   5   1 49.8641 28.9766   6
   1   5  -1 33.3729 17.5289   7
   1   5  -1 25.5911 19.5856   1
  -1   5   1 41.5150 23.8236   1
  -1   5   2-7.41038 31.1805  25
  -1   5   2 3.69556 19.5803   7
  -1   5   2 9.81900 29.7360   6
   1   5  -2-8.27470 18.5476   1
   1   5  -2 1.96469 15.2554   7
  -1   5   2-2.81044 23.7572   1
  -1   5   3 48.0249 34.5886  25
  -1   5   3 13.3280 32.8524   6
   1   5  -3 29.7037 16.4256   7
   1   5  -4 164.263 34.0147  25
  -1   5   4 193.292 44.5339   5
  -1   5   4 149.146 37.4541  25
  -1   5   4 182.510 46.7332   6
   1   5  -4 146.574 19.7212   7
   1   5  -5 91.1551 31.8313  25
  -1   5   5 30.8112 33.6479  25
   1   5  -6 18.0745 29.3778  25
  -1   5   6 23.1820 35.7111  25
   1   5  -7 3.69049 27.8102  25
  -1   5   7 25.6838 36.5873  25
   1   5  -8-29.9145 28.8040  25
  -1   5   8 21.4436 35.8467  25
   1  -5  -8 32.2282 22.8557  22
  -1   5   8-8.95058 82.2945  29
  -1   5   9 38.0159 35.6313  25
  -1   5   9 36.1737 85.3181  29
   1  -5  -9 26.2298 21.2153  22
   1  -5 -10 3.31671 19.4685  22
  -1   5  10 121.423 92.0027  29
   1  -5 -11-1.04467 18.2437  22
  -1   5  11 171.164 91.9503  29
   1  -5 -12 58.3940 19.4116  22
  -1   5  12 96.3398 86.8682  29
   1  -5 -13 25.4010 17.4880  22
  -1   5  13 62.3188 78.7065  29
   1  -5 -14 26.5366 15.6549  22
  -1   5  14-3.51154 72.8198  29
   1  -5 -15-11.4769 12.9328  22
  -1   5  15 3.24417 20.8027  24
  -1   5  15-3.04286 66.3839  29
  -1   5  16 10.7314 18.0721  24
  -1   5  16 17.3799 59.8908  29
   1   6  13 44.7477 53.4946  29
   1   6  13 10.9260 10.9899   7
   1   6  12 16.2697 13.2460   7
   1   6  12 42.6817 57.4129  29
   1   6  11 48.5722 64.2463  29
   1   6  11 6.36660 13.9856   7
   1   6  10 66.9025 70.0839  29
   1   6  10 5.38947 14.7397   7
   1   6   9 46.1581 17.4898   7
   1   6   9-32.3429 70.7831  29
  -1   6  -8 38.1887 23.1327  25
   1   6   8 84.6382 19.3647   7
   1   6   8 7.55896 72.3379  29
  -1   6  -7 26.6078 23.4479  25
   1   6   7 7.80569 72.3112  29
   1   6   7 43.4351 17.7902   7
  -1   6  -6 93.4288 26.8205  25
   1   6   6 96.2176 19.8130   7
  -1   6  -5 15.7392 24.1219  25
   1   6   5 29.9936 17.1214   7
  -1   6  -4 14.3755 25.5803  25
   1   6   4-1.09821 16.3169   7
  -1   6  -3 162.341 31.1433  25
  -1   6  -3 202.397 21.1131   7
   1   6   3 194.625 23.1440   7
  -1   6  -2 213.355 33.3851  25
  -1   6  -2 240.376 23.0368   7
   1   6   2 230.480 23.8742   7
  -1   6  -1 25.0003 25.3373  25
   1   6   1 44.8979 16.4354   7
  -1   6  -1 22.9637 15.6814   7
  -1   6   0 15.1707 25.4039  25
  -1   6   0 4.18692 15.5070   7
   1   6   0-1.98701 14.0620   7
  -1   6   1 15.4160 27.2308  25
   1   6  -1 29.8485 14.8817   7
  -1   6   1 21.8804 16.5876   7
  -1   6   2 181.534 34.1567  25
   1   6  -2 249.143 22.8164   7
  -1   6   2 249.400 26.3621   7
  -1   6   3 165.609 34.1479  25
   1   6  -3 173.948 20.0439   7
  -1   6   3 227.244 25.9134   7
  -1   6   4-8.70880 27.9636  25
  -1   6   4 11.1816 17.8628   7
   1   6  -5 33.2870 25.3304  25
  -1   6   5 22.4094 28.6917  25
  -1   6   5 36.9561 19.1085   7
   1   6  -6 122.803 29.5655  25
  -1   6   6 84.2060 31.7801  25
  -1   6   6 177.981 24.9928   7
  -1   6   7 22.6472 29.2971  25
  -1   6   7 20.1733 18.9529   7
  -1   6   8 57.9712 20.3604   7
  -1   6   9 35.8718 18.8384   7
  -1   6  10 23.1077 17.2147   7
   1  -6 -10 12.3203 14.3023  22
   1  -6 -11 3.05563 13.0800  22
  -1   6  11 0.86602 15.0601   7
   1  -6 -12-8.89664 11.7788  22
  -1   6  12 19.2007 54.8295  29
  -1   6  12 6.41902 13.2629   7
  -1   6  13 20.9941 11.6494   7
  -1   6  13 11.9168 48.2250  29
   1   7   8 34.2498 10.1477   7
   1   7   7 0.52466 9.40819   7
  -1   7  -6 17.5041 17.0906  25
   1   7   6 12.1247 10.3978   7
  -1   7  -5 17.6525 18.0588  25
   1   7   5 8.61342 10.8360   7
  -1   7  -4 6.54934 17.5248  25
   1   7   4 3.84974 10.5533   7
  -1   7  -3 75.4227 21.3938  25
   1   7   3 61.1483 12.9943   7
  -1   7  -2 84.3625 21.3119  25
   1   7   2 78.5510 13.5895   7
  -1   7  -1 7.00012 19.0545  25
   1   7   1 15.9533 11.1659   7
  -1   7   0 6.99930 19.2323  25
  -1   7   1 52.1928 21.4093  25
  -1   7   1-1.45935 11.7168   7
  -1   7   2 49.9543 21.1642  25
  -1   7   2 85.4837 14.8253   7
  -1   7   3 68.0002 21.3528  25
  -1   7   3 60.8193 13.9820   7
  -1   7   4 4.18971 18.0216  25
  -1   7   4-0.71786 12.2979   7
  -1   7   5 9.63779 12.1983   7
  -1   7   6 12.2166 11.8927   7
  -1   7   7 5.78190 10.7127   7
  -1   7   8 39.1166 10.8069   7
  -2   0 -20 11.7266 19.8259  26
  -2   0 -19 8.65762 23.8621  26
  -2   0 -18 106.943 72.6193  31
  -2   0 -18 27.2245 26.7334  26
  -2   0 -17 98.9436 79.2657  31
  -2   0 -17 8.76158 29.9677  26
  -2   0 -16-36.9898 82.5309  31
  -2   0 -16 34.3120 32.2494  26
  -2   0 -15 15.8683 31.6126  26
  -2   0 -15 21.1841 86.8093  31
  -2   0 -14 99.3078 36.6946  26
  -2   0 -14 92.6029 91.2334  31
  -2   0 -13-2.94037 31.2022  26
  -2   0 -13 6.59009 37.7752  19
  -2   0 -13 16.2444 88.4793  31
  -2   0 -12 144.174 34.8984  26
  -2   0 -12 222.784 47.0695  19
  -2   0 -12 149.572 91.1440  31
  -2   0 -11 16.0800 29.0745  26
  -2   0 -11-4.77963 17.9067  12
  -2   0 -11-42.8229 85.4169  31
  -2   0 -11 5.21455 33.0596  19
  -2   0 -10 115.928 21.5363  12
  -2   0 -10 117.808 35.0742  19
  -2   0  -9-6.87448 18.8304  14
  -2   0  -9-3.95950 25.1029  19
  -2   0  -9 15.7046 15.9524  12
  -2   0  -8 933.215 47.3758  14
  -2   0  -8 971.074 55.8464  19
  -2   0  -8 845.671 40.7068  12
  -2   0  -7 3.30663 16.6578  14
  -2   0  -7-10.3667 21.2925  19
  -2   0  -7 6.40126 14.5463  12
  -2   0  -6 2841.88 84.2695  14
  -2   0  -6 2666.79 88.6099  19
  -2   0  -5 14.4468 15.3909  14
  -2   0  -5 7.27544 18.7495  19
  -2   0  -4 63.6835 17.0334  14
  -2   0  -4 40.9364 19.2620  19
  -2   0  -3 3.85203 15.1612  14
  -2   0  -3 14.7343 17.0964  19
  -2   0  -2 3285.77 84.0215  14
  -2   0  -2 3311.04 86.1613  19
  -2   0  -1 6.47297 13.2268  14
  -2   0  -1-0.47168 14.3958  19
  -2   0   0 2853.32 74.4183  14
   2   0   0 3211.08 90.9979  20
   2   0  -1 19.7524 25.0563  20
   2   0  -2 2571.26 80.2783  20
   2   0  -3 4.55204 10.4918  10
   2   0  -3-5.38159 16.3370  13
   2   0  -4 23.2841 16.5729  13
   2   0  -4 37.6370 13.1060  10
   2   0  -5 1.91047 12.6657   9
   2   0  -5 1.74661 12.2421  10
  -2   0   5 3.61115 14.5027  17
   2   0  -6 2552.13 77.8803  10
   2   0  -6 2500.36 70.5177   9
  -2   0   6 2299.73 73.3630  17
   2   0  -7 7.70330 12.9368   9
  -2   0   7 7.18674 16.5244  17
  -2   0   8 821.494 44.6900  17
   2   0  -8 775.471 37.2687   9
   2   0  -9-6.91453 14.9704   9
  -2   0   9 1.48094 21.8119  17
   2   0 -10 162.139 23.5784   9
  -2   0  10 154.773 32.3780  17
   2   0 -11 33.4416 44.9642  34
   2   0 -11 18.8918 18.7713   9
   2   0 -12 72.7014 48.8290  34
   2   0 -12 306.517 32.4757   9
   2   0 -13-11.1473 21.0555   9
   2   0 -13 128.389 52.9488  34
   2   0 -14 156.324 58.5439  34
   2   0 -15-50.7205 79.0387  31
   2   0 -16-134.589 79.5455  31
   2   0 -17 2.65878 25.9235  26
   2   0 -17-87.8631 77.0908  31
   2   0 -18 24.9866 25.1546  26
   2   0 -18 122.142 73.0473  31
   2   0 -19 1.00344 21.7441  26
   2   0 -19 27.3407 62.4319  31
   2   0 -20 40.5052 54.9013  31
  -2   1 -20 7.35413 20.0751  26
  -2   1 -19-5.41028 25.4639  26
  -2   1 -18-7.94598 27.5847  26
  -2  -1 -17 97.9561 78.3686  31
  -2   1 -17 159.924 77.0215  31
  -2   1 -17 41.0610 32.2100  26
  -2  -1 -16 90.9434 84.0538  31
  -2   1 -16 15.5248 78.1841  31
  -2   1 -16 21.4516 33.9172  26
  -2   1 -15 818.675 109.369  31
  -2  -1 -15 987.082 119.224  31
  -2   1 -15 885.218 59.7138  26
  -2   1 -14 457.965 100.886  31
  -2  -1 -14 524.126 106.654  31
  -2   1 -14 602.093 52.1907  26
  -2   1 -13 112.390 88.6108  31
  -2  -1 -13 277.897 100.150  31
  -2  -1 -13 569.989 63.4013  19
  -2   1 -13 447.972 46.8960  26
  -2   1 -12 25.3266 33.3629  26
  -2  -1 -12 53.1889 90.0942  31
  -2   1 -12-10.9425 82.6106  31
  -2  -1 -12 2.80588 34.1380  19
  -2  -1 -11 672.457 56.9940  19
  -2  -1 -11 711.777 44.1619  12
  -2  -1 -11 658.803 107.127  31
  -2   1 -11 627.217 47.2231  26
  -2  -1 -10 775.127 43.7517  12
  -2  -1 -10 799.008 58.1699  19
  -2  -1  -9 3418.40 101.900  12
  -2   1  -9 3291.35 123.512  19
  -2  -1  -9 3444.88 116.400  19
  -2   1  -8 1389.42 60.0853  14
  -2  -1  -8 1388.42 55.9204  12
  -2  -1  -8 1433.05 66.3779  19
  -2   1  -8 1489.89 73.4250  19
  -2   1  -7 95.9381 22.1062  14
  -2   1  -7 72.7435 28.6028  19
  -2  -1  -7 79.3146 17.9043  12
  -2  -1  -7 83.3888 24.4574  19
  -2   1  -6 178.861 23.9917  14
  -2   1  -6 148.179 29.6692  19
  -2   1  -5 8722.66 203.085  14
  -2   1  -5 8445.04 212.146  19
  -2   1  -4 1775.83 68.4329  19
   2  -1   3 425.100 35.4582  20
  -2   1  -3 460.043 35.4443  19
   2  -1   2 1047.15 55.1076  20
   2   1   1 36083.6 737.592  10
   2  -1   1 34884.4 755.270  20
  -2   1   0 78834.0 1615.51  21
   2  -1   0 79647.3 1623.90  20
   2   1   0 78765.9 1609.55  10
  -2   1   0 78813.0 1596.93  17
  -2   1   1 37907.3 788.836  21
   2  -1  -1 36973.4 792.645  20
   2   1  -1 37810.1 780.271  10
  -2   1   1 37386.9 767.311  17
   2  -1  -2 1135.50 57.4952  13
  -2   1   2 1342.23 65.6070  21
   2   1  -2 1153.01 48.2510  10
  -2   1   2 1338.86 42.1927  17
   2  -1  -3 393.443 35.4843  13
  -2   1   3 490.887 25.0124  17
   2  -1  -4 1811.23 68.1115  13
   2  -1  -4 1784.93 54.4517   9
  -2   1   4 1855.42 56.1284  17
   2  -1  -5 8260.27 186.091   9
  -2   1   5 8231.42 190.250  17
  -2   1   6 128.682 20.3584  17
   2  -1  -6 175.366 18.3821   9
  -2   1   7 54.1504 18.9111  17
   2  -1  -7 94.0553 16.6384   9
  -2  -1   7 53.3541 20.9620  17
   2   1  -8 1269.52 66.5740  11
   2  -1  -8 1420.40 53.1185   9
  -2   1   8 1450.33 59.5903  17
  -2  -1   8 1451.53 63.2749  17
   2  -1  -9 3250.91 95.1171   9
  -2   1   9 3205.68 104.060  17
   2  -1 -10 1000.06 47.3134   9
  -2   1  10 854.809 55.3012  17
   2  -1 -11 829.829 42.5829   9
  -2   1  11 762.997 55.0629  17
   2  -1 -12-8.26191 16.3738  32
   2  -1 -12 4.46927 20.6104   9
   2   1 -12-24.3873 50.8329  34
  -2   1  12 20.0254 32.8538  17
   2  -1 -13 57.3605 19.1612  32
   2   1 -13 62.6796 55.2034  34
   2   1 -14-17.9845 54.9133  34
   2  -1 -15 502.729 96.8396  31
   2   1 -15 415.141 68.8957  34
   2   1 -15 487.239 95.3397  31
   2  -1 -16 74.1720 76.9090  31
   2   1 -16-40.1547 75.2196  31
   2   1 -17 99.3679 22.9520   8
   2   1 -17 89.9565 71.3707  31
   2  -1 -18-3.65383 24.6878  26
   2   1 -18 92.4858 65.1618  31
   2  -1 -18-34.3077 65.4245  31
   2  -1 -19-1.02910 22.2436  26
   2  -1 -19 111.507 60.7682  31
   2   1 -19 100.651 58.0616  31
   2  -1 -20 6.47268 18.8204  26
   2  -1 -20-35.1837 53.3336  31
   2   1 -20 79.8256 50.8662  31
  -2   2 -18-9.53308 25.3984  26
  -2   2 -17 1.43184 30.3454  26
  -2   2 -16 33.9371 34.6912  26
  -2   2 -15-1.72466 34.5219  26
  -2   2 -14 28.0296 35.4594  26
  -2   2 -13 37.5461 38.6121  26
  -2   2 -12 15.8698 42.5175  16
  -2  -2 -12 5.57881 33.4957  19
  -2   2 -12 20.9032 37.1358  26
  -2   2 -11 267.744 53.4468  16
  -2  -2 -11 258.145 31.9732  12
  -2  -2 -11 292.116 44.7138  19
  -2   2 -10-16.3818 34.3218  16
  -2  -2 -10 14.8748 19.9403  22
  -2  -2 -10 1.35914 19.6616  12
  -2  -2 -10 4.59435 28.7790  19
  -2   2 -10 12.0186 30.8778  26
  -2   2  -9-5.87998 33.2106  16
  -2  -2  -9-4.16193 25.9644  19
  -2  -2  -9-9.93346 19.0782  12
  -2   2  -8 68.1986 33.8241  16
  -2  -2  -8 88.0488 20.3686  12
  -2  -2  -7 1944.63 67.6806  12
  -2   2  -7 1967.48 91.4973  16
  -2   2  -6 14.5448 26.9770  16
   2   2   6 42.7011 16.4700  15
  -2  -2  -6 57.8939 17.5099  12
  -2   2  -6 13.8217 21.1920  21
  -2   2  -5 26.0182 26.0565  16
   2   2   5 32.1310 15.7824  15
  -2   2  -5 11.7860 20.7160  21
   2   2   4 1356.24 52.7694  15
  -2   2  -4 1312.82 58.3506  21
  -2   2  -4 1392.01 67.0988  16
   2   2   3 465.315 29.3656  15
  -2   2  -3 403.582 34.4487  21
   2  -2   3 354.003 36.3414  20
  -2   2  -3 438.625 41.8408  16
   2   2   2 122.323 18.7871  15
  -2   2  -2 129.872 26.7880  21
   2  -2   2 117.435 28.1417  20
   2   2   1 88.5723 16.0238  15
  -2   2  -1 95.5918 25.6488  21
   2  -2   1 102.130 27.4241  20
   2   2   0 406.350 26.2138  15
   2   2   0 400.022 30.2874  11
  -2   2   0 336.925 36.4157  21
   2  -2  -1 97.1474 24.8772  13
   2   2  -1 83.7312 20.7676  11
   2  -2  -2 106.890 23.1816  13
   2   2  -2 122.009 24.7356  11
   2  -2  -3 457.973 37.3435  13
   2   2  -3 483.919 39.4195  11
  -2   2   3 497.099 27.8787  17
   2   2  -4 1507.20 69.9336  11
  -2   2   4 1358.74 50.4006  17
   2   2  -5 40.0215 24.7640  11
  -2   2   5 7.58116 15.6265  17
   2   2  -6 33.7577 24.7886  11
  -2   2   6 36.9982 18.2464  17
   2   2  -7 2068.56 94.5951  11
  -2   2   7 2193.50 94.7438  18
  -2   2   7 2053.98 74.2080  17
   2   2  -8 80.9627 31.7151  11
  -2   2   8 68.8727 22.5647  17
   2   2  -9-11.5391 25.2415  11
  -2   2   9 19.8397 22.8734  17
   2  -2 -10 5.74568 15.6009  32
  -2   2  10-5.73923 25.0156  17
   2   2 -10-53.0009 49.4281  34
   2  -2 -11 26.0786 17.3162  32
   2   2 -11 15.9619 50.8812  34
   2   2 -12-26.7808 54.4511  34
   2  -2 -12 20.1528 18.0219  32
   2   2 -13-64.0375 55.9720  34
   2   2 -14-13.1710 55.0290  34
   2   2 -15-81.3748 56.0524  34
  -2   2  15-106.914 125.183  29
   2   2 -16 123.834 24.5564   8
   2   2 -16 153.290 57.3226  34
  -2   2  16 13.8186 132.705  29
  -2   2  17 116.564 134.620  29
   2  -2 -19 1.84153 20.5140  26
   2  -2 -20 12.4342 16.6283  26
   2   3  14 310.835 47.6774  24
   2   3  13 87.1398 38.6771  24
   2   3  12 111.221 40.3596  24
  -2   3 -11 359.020 62.3663  16
   2   3  11 451.605 49.1041  24
  -2  -3 -11 386.516 52.9733  19
  -2  -3 -11 394.551 33.3044  22
  -2   3 -10 139.882 48.7802  16
  -2  -3 -10 154.293 26.5582  22
  -2  -3 -10 172.937 40.7776  19
  -2  -3  -9 478.782 34.4677  22
  -2   3  -9 547.846 68.5587  16
  -2   3  -8 167.401 46.2294  16
   2   3   8 205.095 106.294  29
  -2  -3  -8 106.245 26.2084  22
  -2   3  -7 157.343 42.0202  16
  -2  -3  -7 215.740 27.6756  22
   2   3   6 221.254 29.2800  15
  -2   3  -6 181.731 42.6388  16
   2   3   5 848.837 51.1840  15
  -2   3  -5 919.244 56.4567  21
  -2   3  -5 767.972 64.7692  16
   2   3   4 1955.08 75.0446  15
  -2   3  -4 1880.75 82.9509  21
   2   3   3 14.3997 17.9685  15
  -2   3  -3 13.0115 25.8882  21
   2   3   2 93.1955 22.7925  15
   2   3   1 1636.53 65.8579  15
  -2   3  -1 1624.69 67.3115  18
   2   3   0 3578.33 111.651  15
  -2   3   0 3848.85 116.643  18
   2   3  -1 1445.74 60.0912  15
  -2   3   1 1538.41 66.4485  18
  -2   3   2 99.6646 27.6407  18
   2   3  -2 59.3881 26.9190  11
   2  -3  -2 71.7366 25.1052  13
   2   3  -3 9.78290 23.9277  11
  -2   3   3 22.3951 25.5231  18
   2   3  -4 1764.77 92.0412  11
  -2   3   4 1902.42 79.9203  18
   2   3  -5 1091.94 74.2273  11
  -2   3   5 1094.23 63.1537  18
   2   3  -6 256.181 43.9983  11
  -2   3   6 173.231 35.2341  18
  -2   3   7 100.896 48.1381  33
   2   3  -7 195.946 42.8590  11
   2   3  -7 68.6320 55.8343  34
  -2   3   7 183.237 36.9624  18
  -2   3   8 97.0804 49.2975  33
   2   3  -8 182.902 47.0104  11
   2   3  -8 54.6810 53.4195  34
   2   3  -9 169.962 57.3948  34
  -2   3   9 188.241 57.4608  33
   2   3 -10 161.541 47.0856  11
  -2   3  10 40.3422 86.8536  29
   2   3 -10 95.5177 56.0040  34
   2   3 -11 169.425 59.8327  34
  -2   3  11 247.611 105.988  29
   2   3 -12 90.2963 57.9347  34
  -2   3  12-5.20257 98.8725  29
   2   3 -13-5.16168 53.9928  34
  -2   3  13 54.8281 103.450  29
  -2   3  14 271.506 112.136  29
   2   3 -14-27.6186 53.5152  34
  -2   3  15 73.7960 107.500  29
  -2   3  16-60.5826 102.611  29
  -2   3  17 10.2707 100.976  29
   2  -3 -18 7.88244 19.8860  26
  -2   3  18-4.53222 95.9160  29
   2  -3 -19 64.0170 17.7255  26
   2   4  16-18.1576 32.2983  24
   2   4  15 20.0932 31.9019  24
   2   4  14 3.89825 32.9527  24
   2   4  13 18.1844 31.6272  24
   2   4  12 89.9472 38.2073  24
   2   4  12 184.516 110.504  29
   2   4  11 103.321 36.5347  24
   2   4  11 130.138 105.819  29
   2   4  10 5.62430 106.689  29
   2   4  10-3.95593 33.7374  24
  -2  -4  -9 38.1111 24.3019  22
   2   4   9 36.2737 33.9699  24
   2   4   9 22.0739 110.464  29
   2   4   8 67.6588 33.1986  24
  -2  -4  -8 49.6032 25.1272  22
   2   4   8 91.2449 109.811  29
   2   4   7 407.900 45.5476  15
  -2  -4  -7 483.971 37.8175  22
   2   4   7 472.483 46.4981  24
   2   4   6 37.8168 25.2582  15
  -2   4  -6 11.4422 25.8043  25
  -2  -4  -6 18.9762 23.4594  22
   2   4   6 21.5775 28.5005  24
   2   4   5 10.6912 22.3998  15
  -2   4  -5-2.82596 26.2758  25
   2   4   4 39.1543 22.5774  15
  -2   4  -4 14.0681 26.3119  25
   2   4   4 97.5761 97.4918  29
   2   4   3 516.020 43.4603  15
  -2   4  -3 386.975 39.3777  25
   2   4   3 492.403 111.949  29
   2   4   2 7.72806 20.0033  15
  -2   4  -2 10.2713 27.2364  25
   2   4   2 69.0038 95.2164  29
   2   4   2 15.5118 58.0093  27
   2   4   1 259.092 34.1501  15
  -2   4  -1 228.549 35.8155  25
   2   4   1 315.874 102.116  29
   2   4   1 205.200 61.8619  27
   2   4   0 327.928 35.3841  15
  -2   4   0 308.516 40.0732  25
   2   4   0 444.598 103.767  29
   2   4   0 261.130 63.3155  27
  -2   4   1 257.402 39.7453  25
  -2   4   1 234.575 33.5631  18
  -2   4   2 34.2612 33.3500  25
  -2   4   2 32.3128 25.5909  18
   2   4  -2-7.75350 45.3252  27
  -2   4   3 502.115 45.0220  18
   2   4  -4 83.2558 66.1913  34
   2   4  -4 22.1380 32.5579  11
  -2   4   4 27.6932 27.4433  18
   2   4  -5 58.0031 62.8981  34
   2   4  -5 20.1560 36.1475  11
  -2   4   5 24.3358 26.2159  18
   2   4  -6 41.7149 61.9174  34
   2   4  -6-4.36063 35.8613  11
  -2   4   6 18.9068 27.3571  18
   2   4  -7 558.533 71.2701  11
  -2   4   7 432.672 49.7456  18
  -2   4   8 32.8484 33.8780  18
   2   4  -8 20.7410 56.7160  34
   2   4  -9-33.6241 57.8489  34
  -2   4   9-9.05944 88.1827  29
  -2   4  10-18.8411 93.2277  29
  -2   4  11 53.1359 86.1101  29
  -2   4  12 121.641 91.5083  29
   2  -4 -13 5.35160 19.3074  22
  -2   4  13 67.1037 89.1311  29
   2  -4 -14 13.3724 18.0893  22
  -2   4  14 64.3351 91.1011  29
   2  -4 -15 75.2138 19.5257  22
  -2   4  15 94.0049 84.4473  29
  -2   4  16-3.82529 79.0884  29
  -2   4  17 91.0535 77.1625  29
   2   5  15 1.15276 23.3302  24
   2   5  15-5.81292 37.7205  27
   2   5  14 34.4664 73.9735  29
   2   5  14-2.66283 25.6558  24
   2   5  13 4.42268 26.1736  24
   2   5  13 118.682 87.5704  29
   2   5  12 17.4775 84.3540  29
   2   5  12 82.3725 30.7184  24
   2   5  11 23.4530 89.9197  29
   2   5  11 21.5961 29.0746  24
   2   5  10 206.624 94.0129  29
   2   5  10 110.928 33.9206  24
  -2   5  -9 51.6142 26.1436  25
   2   5   9 49.9586 30.6043  24
  -2   5  -8 24.8796 24.5378  25
   2   5   8 47.9821 29.1730  24
   2   5   8 25.6491 92.5359  29
  -2   5  -7 34.7919 25.8358  25
   2   5   7 46.1951 95.9769  29
  -2   5  -6 89.6282 29.1583  25
   2   5   6 137.348 100.208  29
   2   5   6 102.344 62.6661  27
  -2   5  -5 447.280 42.7400  25
   2   5   5 490.368 112.521  29
   2   5   5 331.426 74.7940  27
  -2   5  -4 820.190 52.0967  25
   2   5   4 895.503 130.207  29
   2   5   4 778.808 89.1023  27
  -2   5  -3 238.693 35.9285  25
   2   5   3 185.784 101.209  29
   2   5   3 227.194 68.7720  27
  -2   5  -2 243.498 36.9135  25
   2   5   2 177.669 65.4372  27
  -2   5  -1 80.7272 31.9851  25
   2   5   1 84.8546 90.3929  29
   2   5   1-9.60831 53.1836  27
  -2   5   0 288.787 40.5769  25
   2   5   0 186.397 60.0076  27
  -2   5   1 55.3801 34.5267  25
   2   5  -1 23.3444 52.1261  27
  -2   5   2 322.552 45.2169  25
  -2   5   3 228.961 45.0304  25
   2   5  -3 272.054 74.4007  34
  -2   5   4 804.835 62.4421  25
   2   5  -4 474.356 78.1201  34
  -2   5   5 368.111 51.5841  25
   2   5  -5 414.394 73.6572  34
  -2   5   6 117.582 41.3064  25
  -2   5   7 57.2005 40.8461  25
  -2   5   8 33.2031 40.7230  25
  -2   5   9 41.5740 38.6188  25
  -2   5  10 103.166 40.8705  25
  -2   5  11 48.7237 36.9124  25
   2  -5 -11 26.3261 17.9752  22
  -2   5  11 72.1440 79.7166  29
  -2   5  12 27.3294 33.8970  25
   2  -5 -12 62.1073 18.8067  22
  -2   5  12 26.2680 77.5921  29
  -2   5  13 1.57993 28.0486  25
   2  -5 -13 2.33048 15.6482  22
  -2   5  14 13.1315 25.9054  25
   2  -5 -14-3.89107 13.7050  22
  -2   5  14 59.9870 67.0804  29
   2  -5 -15 11.6310 11.8742  22
  -2   5  15-50.2655 59.6869  29
   2   6  12-2.40742 54.3885  29
   2   6  11-25.3116 59.3515  29
   2   6  10-6.31612 65.9721  29
   2   6   9 17.2323 68.7672  29
  -2   6  -8-5.04857 20.2633  25
   2   6   8 66.1773 74.8693  29
  -2   6  -7 34.9513 21.8628  25
   2   6   7 115.417 77.9875  29
  -2   6  -6 15.5890 21.8335  25
   2   6   6-23.7584 74.4447  29
   2   6   6-2.83543 43.4468  27
  -2   6  -5 29.6075 23.5914  25
   2   6   5-24.1017 78.3308  29
   2   6   5-26.0233 46.0765  27
  -2   6  -4 30.5256 24.2023  25
   2   6   4-11.6004 45.5129  27
  -2   6  -3-12.6021 24.3982  25
   2   6   3 31.5633 47.9666  27
  -2   6  -2 163.255 31.6542  25
   2   6   2 19.6613 43.6779  27
  -2   6  -1 53.2838 26.7544  25
  -2   6   0 42.8879 27.4983  25
   2   6   0 136.441 63.9069  34
  -2   6   1 36.8760 28.6174  25
   2   6  -1 38.3140 59.2274  34
  -2   6   2 107.500 31.3628  25
  -2   6   3-29.1616 31.9667  25
  -2   6   4 54.9826 31.2802  25
  -2   6   5-25.4855 30.4350  25
  -2   6   6 8.89369 28.8390  25
  -2   6   7 46.0197 30.2118  25
  -2   6   8 17.5466 29.2792  25
  -2   6   9 23.2354 26.4552  25
  -2   6  10 7.68036 24.2387  25
   2  -6 -10-0.61515 13.1476  22
  -2   6  11-10.8435 21.7741  25
   2  -6 -11 4.34563 11.6585  22
   2  -6 -12 5.49016 10.4779  22
   2   7   7 113.900 37.4535  34
   2   7   6 136.222 40.4238  34
  -2   7  -5 44.4193 18.6963  25
  -2   7  -4 215.198 25.1432  25
  -2   7  -3 85.6282 21.8590  25
  -2   7  -2 18.6889 19.2419  25
  -2   7  -1 15.7200 19.2803  25
  -2   7   0 9.11551 18.9613  25
  -2   7   1 10.2439 19.9609  25
  -2   7   2 22.4509 19.6903  25
  -2   7   3 37.2487 20.7584  25
  -2   7   4 208.091 25.7314  25
  -2   7   5 39.0686 19.5352  25
  -2   7   6 77.2638 19.4887  25
  -2   7   7 0.77985 15.1814  25
  -3   0 -19 9.50595 21.0284  26
  -3   0 -18-10.9585 24.1633  26
  -3   0 -17 10.3477 27.1787  26
  -3   0 -16 18.7156 29.9448  26
  -3   0 -15-18.2734 31.0125  26
  -3   0 -14 40.0882 32.1723  26
  -3   0 -13 83.7817 90.6523  31
  -3   0 -13-1.50610 33.0773  26
  -3   0 -12 198.814 94.7437  31
  -3   0 -12 281.169 54.8912  19
  -3   0 -11 150.347 89.2453  31
  -3   0 -11 3.12381 36.5036  19
  -3   0 -10 557.934 50.4475  14
  -3   0 -10 578.997 38.2740  12
  -3   0 -10 411.980 94.6631  31
  -3   0 -10 598.925 60.1780  19
  -3   0  -9 1.85625 24.2725  14
  -3   0  -9 4.55338 17.6779  12
  -3   0  -9-9.88012 30.5646  19
  -3   0  -8 25.2331 23.9619  14
  -3   0  -8 8.34586 16.7915  12
  -3   0  -8-4.36691 29.9048  19
  -3   0  -7 15.1307 21.2810  14
  -3   0  -7 13.3942 25.6673  19
  -3   0  -6 1092.12 53.3366  14
  -3   0  -6 1098.33 58.2773  19
  -3   0  -5 4.82470 17.4499  14
  -3   0  -5 20.8676 22.6106  19
  -3   0  -4 5932.60 151.301  14
  -3   0  -4 5903.67 155.880  19
  -3   0  -3 19.2069 17.9609  14
  -3   0  -2 2002.92 65.4384  14
   3   0   2 2106.09 85.2340  20
  -3   0  -1 29.8582 17.0666  14
   3   0   1 44.9485 34.2193  20
  -3   0   0-7.66354 15.7497  14
   3   0   0 20.1649 30.9005  20
   3   0  -1 9.55550 30.5304  20
   3   0  -2 1906.40 79.9511  20
   3   0  -3 27.0536 23.6476  13
   3   0  -3 1.91021 12.0149  10
   3   0  -4 4465.79 122.557  10
   3   0  -5 5.89141 13.6406  10
  -3   0   5 19.5583 16.0261  17
   3   0  -6 958.800 47.3020  10
  -3   0   6 876.021 43.9936  17
   3   0  -7 1.46118 15.8316  10
  -3   0   7 5.13033 18.3834  17
  -3   0   8 1.47441 20.4661  17
  -3   0   9 6.80329 22.9753  17
   3   0 -10 21.9097 43.5857  34
   3   0 -10 35.1600 16.4047  32
   3   0 -11 18.2243 45.8050  34
   3   0 -11 15.5879 16.5098  32
  -3   0  11 2.34641 32.0273  17
   3   0 -12 48.9052 50.7993  34
  -3   0  12 312.927 49.3671  17
   3   0 -13-26.4170 50.2444  34
   3   0 -14 101.427 55.7992  34
   3   0 -16-4.08766 74.5970  31
   3   0 -17-30.0635 70.5255  31
   3   0 -18-65.3968 65.3600  31
   3   0 -19-21.3143 55.1682  31
   3   0 -20-9.89338 47.6247  31
  -3   1 -17 2.69898 27.1837  26
  -3   1 -16-1.52071 30.5845  26
  -3   1 -15 13.0056 33.3102  26
  -3   1 -14 34.8523 34.6769  26
  -3   1 -13 40.7493 35.4739  26
  -3  -1 -12 4.32436 91.9080  31
  -3  -1 -12 23.9509 21.6476  12
  -3  -1 -12-3.24460 37.3790  19
  -3   1 -12 31.0522 34.9471  26
  -3  -1 -11 10.8424 26.9456  14
  -3  -1 -11 2.99922 20.1158  12
  -3  -1 -11-8.85825 34.1787  19
  -3   1 -11 4.33810 32.7103  26
  -3  -1 -10 186.558 34.9901  14
  -3  -1 -10 135.267 26.0272  12
  -3  -1 -10 291.204 98.1349  31
  -3  -1 -10 170.401 40.2182  19
  -3   1 -10 45.1191 33.8954  26
  -3  -1  -9 233.001 34.6596  14
  -3  -1  -9 360.730 96.9427  31
  -3  -1  -9 160.545 26.7387  12
  -3   1  -9 174.972 43.6999  19
  -3  -1  -9 217.834 38.6362  19
  -3   1  -9 30.2184 31.3565  26
  -3  -1  -8 630.575 46.4044  14
  -3  -1  -8 632.524 39.4845  12
  -3   1  -8 687.656 59.2461  19
  -3  -1  -8 598.744 51.4735  19
  -3   1  -7 228.152 40.3783  19
  -3  -1  -7 241.865 34.5966  19
  -3   1  -6 587.287 48.7834  19
  -3  -1  -6 602.955 44.2333  19
   3  -1   5 56.1348 31.8730  20
  -3  -1  -5 20.6250 22.6443  19
   3  -1   4 89.9496 32.7648  20
   3  -1   3 531.204 46.6012  20
   3  -1   2 1316.78 69.8586  20
   3  -1   1 75.9803 31.0237  20
  -3   1   0 11.7220 21.1870  21
   3  -1   0 37.6455 29.6928  20
   3   1   0 5.68942 12.3082  10
  -3   1   1 84.4013 24.7791  21
   3  -1  -1 52.1031 31.2196  20
   3   1  -1 86.2095 16.7121  10
   3   1  -2 1384.61 56.0159  10
  -3   1   2 1447.06 47.0390  17
   3  -1  -3 567.234 45.5262  13
   3   1  -3 590.268 37.1482  10
  -3   1   3 562.763 29.7499  17
   3   1  -4 91.3954 19.6263  10
   3  -1  -4 100.938 26.8035  13
  -3   1   4 90.2655 18.0513  17
   3  -1  -5 3.48067 20.4302  13
  -3   1   5 2.81653 14.8095  17
   3  -1  -6 499.841 32.9553  10
  -3   1   6 531.400 33.9108  17
  -3   1   7 179.186 24.9386  17
  -3  -1   7 195.494 27.8013  17
  -3   1   8 610.370 41.3031  17
  -3  -1   8 664.939 47.2867  17
   3   1  -9 54.6260 46.1065  34
   3   1  -9 176.457 32.0407  11
   3  -1  -9 20.4980 15.0274  32
  -3   1   9 148.910 28.1311  17
  -3  -1   9 204.954 37.2827  17
   3   1 -10 14.4237 47.2524  34
   3  -1 -10 1.87643 14.8622  32
  -3   1  10 172.694 32.6630  17
  -3  -1  10 155.670 37.6618  17
   3  -1 -11 12.2636 16.4073  32
  -3   1  11-2.25052 28.3087  17
   3   1 -12 16.9762 52.5525  34
   3  -1 -12-3.29298 16.6819  32
  -3   1  12 44.6269 35.0866  17
   3  -1 -13 3.46375 17.4494  32
   3   1 -13 5.15584 55.5580  34
   3   1 -14-10.7111 53.7709  34
   3  -1 -14 15.3383 17.6329  32
   3   1 -15 83.6078 57.9092  34
   3   1 -16 135.955 57.6652  34
   3  -1 -16-3.93883 74.3320  31
   3   1 -16 42.1919 72.2553  31
   3   1 -17 51.9556 66.8604  31
   3  -1 -17-7.15531 68.3466  31
   3  -1 -18 42.2159 24.0334  26
   3  -1 -18 58.3445 63.3030  31
   3   1 -18-11.7888 59.7444  31
   3  -1 -19-11.8989 19.6052  26
   3   1 -19 27.8986 50.7882  31
   3  -1 -19 68.8262 55.6024  31
  -3   2 -14 1.70956 33.6703  26
  -3   2 -13 17.1656 36.0175  26
  -3   2 -12 18.2971 35.5036  26
  -3   2 -11 116.036 48.6771  16
  -3  -2 -11 96.8426 32.2224  14
  -3  -2 -11 86.0020 25.4960  12
  -3  -2 -11 69.5026 37.6203  19
  -3   2 -11 48.6437 35.6215  26
  -3   2 -10 261.923 56.5288  16
  -3  -2 -10 241.226 30.9432  12
  -3  -2 -10 242.723 43.8918  19
  -3   2  -9 120.013 44.2201  16
   3   2   9 114.547 34.9494  24
  -3  -2  -9 114.912 26.0367  12
  -3  -2  -9 134.789 35.7382  19
  -3   2  -9 77.3640 34.8583  26
   3   2   8 473.568 46.9731  24
  -3  -2  -8 518.145 35.9729  12
  -3   2  -8 518.978 48.0444  21
  -3  -2  -8 536.053 49.8945  19
  -3   2  -8 484.241 57.6940  16
  -3   2  -7 301.001 39.3208  21
  -3  -2  -7 290.615 28.5354  12
  -3   2  -6 25.8524 25.3817  21
  -3   2  -5 549.617 44.8872  21
   3  -2   5 461.896 48.2466  20
  -3   2  -4 550.384 42.5414  21
   3  -2   4 586.034 49.0505  20
  -3   2  -3 287.221 35.6192  21
   3  -2   3 314.510 40.7642  20
  -3   2  -2 138.832 28.3108  21
   3  -2   2 157.474 34.2194  20
  -3   2  -1 1142.04 61.9948  21
   3  -2   1 1221.65 66.8864  20
  -3   2   0 45.4137 26.4135  21
   3  -2  -1 1216.38 67.2888  13
  -3   2   1 1263.93 68.5829  21
   3  -2  -2 156.646 29.8007  13
   3  -2  -3 358.992 39.8953  13
   3  -2  -4 794.226 54.0525  13
   3   2  -5 539.137 46.8889  11
  -3   2   5 550.683 35.4773  17
   3   2  -6 5.02654 23.9243  11
  -3   2   6 25.9274 18.5578  17
   3   2  -7 395.393 45.6538  11
  -3   2   7 299.912 31.7412  17
   3   2  -8 257.599 56.6551  34
   3   2  -8 462.586 51.3970  11
  -3   2   8 53.8596 58.6516  28
  -3   2   8 432.643 38.8960  17
  -3   2   9 71.6921 53.4650  33
   3  -2  -9-1.80021 14.0370  32
   3   2  -9 149.100 36.5530  11
   3   2  -9 29.8016 52.4399  34
  -3   2   9 167.044 32.0903  17
   3   2 -10 267.292 46.4687  11
   3   2 -10 34.0403 54.1161  34
  -3   2  10 272.517 38.3931  17
   3   2 -11-79.6168 57.2196  34
   3  -2 -11-5.30314 15.9850  32
   3   2 -12-85.8944 58.7160  34
   3  -2 -12 8.99798 16.9031  32
   3   2 -13-24.8044 57.9934  34
   3  -2 -13 12.8105 17.2038  32
   3   2 -14 22.0728 56.6192  34
   3   2 -15-2.67290 54.2638  34
   3   2 -16 101.998 54.4395  34
  -3   2  16-35.9475 108.716  29
  -3   2  17 57.2610 112.598  29
  -3   2  18 36.3034 110.693  29
   3  -2 -19-3.84142 18.6338  26
  -3   2  19 4.28319 97.9683  29
  -3   3 -18 28.2845 16.1532  23
   3   3  13-27.1414 36.6919  24
   3   3  12-6.29249 35.7765  24
   3   3  11 6.20348 32.9511  24
   3   3  10-2.01149 35.8545  24
  -3  -3  -9 38.9747 35.3008  19
   3   3   9-1.94017 32.8759  24
   3   3   8 1.86320 33.2780  24
   3   3   7-5.36095 33.0458  24
  -3   3  -6-2.35686 28.4261  21
   3   3   6 8.57632 31.9555  24
   3   3   5 18.1474 30.3368  24
   3   3   5-18.3782 99.1552  29
  -3   3  -5-9.23446 28.8043  21
   3   3   4 343.534 42.9143  24
  -3   3  -4 197.950 36.8478  21
  -3   3  -3 137.697 34.8725  21
  -3   3  -2 365.606 43.8721  21
   3  -3   1 8.88017 23.5256  13
   3  -3   0 26.6566 22.8669  13
   3  -3  -1 6.63654 24.2280  13
   3  -3  -2 327.578 38.4202  13
   3   3  -3 144.895 34.3661  11
   3  -3  -3 137.242 30.6606  13
   3   3  -4 301.640 44.9177  11
   3   3  -4 308.764 72.4087  34
  -3   3   5 70.4349 44.1597  33
   3   3  -5 22.6991 30.4361  11
  -3   3   5 34.4959 44.5265  28
  -3   3   5 34.3660 28.1225  18
   3   3  -5 41.0780 62.7435  34
   3   3  -6 30.8910 62.7730  34
  -3   3   6 12.9667 45.2650  33
   3   3  -6 10.4844 30.3240  11
  -3   3   6 13.3183 46.7419  28
  -3   3   6 7.44586 29.8039  18
  -3   3   7-22.2186 46.2416  33
   3   3  -7-7.46640 33.2051  11
  -3   3   7 10.3480 29.9448  18
   3   3  -7-23.4722 61.1613  34
   3   3  -8 29.2700 58.5162  34
  -3   3   8-35.7378 49.5283  33
   3   3  -8-4.02044 33.6809  11
  -3   3   9 65.3639 54.0261  33
   3   3  -9-4.19860 34.5282  11
   3   3  -9-13.6114 57.5300  34
  -3   3  10-13.5775 57.6425  33
   3  -3 -10-9.92050 15.2431  32
   3   3 -10 19.4483 57.0122  34
   3   3 -11-61.8581 58.4922  34
   3   3 -12-39.2441 56.8201  34
  -3   3  12 79.7758 90.9909  29
   3   3 -13-21.8700 57.3602  34
  -3   3  13-30.5246 92.6653  29
   3   3 -14 10.3586 52.4113  34
  -3   3  14-75.9335 99.2094  29
   3   3 -15 30.7559 50.4949  34
  -3   3  15-48.9379 96.8592  29
   3   3 -16 2.06746 44.9253  34
  -3   3  16 123.291 91.4040  29
   3   3 -17 146.690 43.4885  34
  -3   3  17-12.2449 86.0408  29
   3  -3 -18 6.00872 17.9590  26
  -3   3  18 85.4175 79.5661  29
   3   4  14 23.3494 32.0830  24
   3   4  13 150.122 38.8867  24
   3   4  12 58.3345 36.1611  24
   3   4  11 12.3549 33.1418  24
   3   4  10 20.7242 36.1935  24
   3   4   9 250.057 115.096  29
   3   4   9 133.780 37.9591  24
   3   4   8 115.356 39.9268  24
   3   4   8 116.769 110.436  29
   3   4   7 1.97616 35.3663  24
   3   4   7 82.6781 111.726  29
   3   4   6 72.9779 35.0799  24
   3   4   6 97.6992 110.031  29
   3   4   5 345.836 120.343  29
   3   4   5 282.762 42.0625  24
   3   4   4 218.360 112.848  29
   3   4   4 127.611 38.2445  24
   3   4   3 30.4132 103.227  29
   3   4   3 47.4775 62.8427  27
   3   4   2 24.6693 99.2300  29
   3   4   2 3.52071 60.1833  27
   3   4   1 77.6630 59.6014  27
   3   4   0-9.67930 53.9354  27
  -3   4   1 65.9597 36.9263  25
  -3   4   1 60.7870 27.0223  18
   3   4  -1 33.8692 52.8751  27
  -3   4   2 21.8777 35.9465  25
  -3   4   2 4.38578 25.1400  18
   3   4  -2-20.6026 49.7595  27
  -3   4   3 92.9051 42.1521  25
   3   4  -3 79.3113 73.6288  34
  -3   4   3 52.8387 27.1256  18
   3   4  -4 43.3182 71.7750  34
  -3   4   4 169.724 35.1621  18
   3   4  -5 204.105 50.5942  11
   3   4  -5 112.233 70.4859  34
  -3   4   5 193.338 38.7816  18
   3   4  -6 56.8022 68.5490  34
  -3   4   6 23.2337 30.0284  18
   3   4  -7 2.95412 64.4480  34
   3   4  -8 43.7591 61.2150  34
   3   4  -9 8.60219 59.1069  34
   3   4 -10 27.9124 56.4933  34
   3   4 -11-53.5211 54.4129  34
  -3   4  11 90.4030 88.2913  29
   3   4 -12 20.0944 51.2305  34
  -3   4  12 4.41187 86.7507  29
  -3   4  13 71.4108 82.3288  29
   3   4 -13 36.6934 49.8391  34
   3   4 -14-18.1919 45.1492  34
   3  -4 -14-6.82340 17.4229  22
  -3   4  14 54.3684 79.3265  29
  -3   4  15 79.8186 75.5243  29
  -3   4  16 41.4877 67.4548  29
   3   5  14 29.5053 40.2650  27
   3   5  13 62.2561 45.7228  27
   3   5  12 44.9689 77.3776  29
   3   5  12 90.4439 51.5032  27
   3   5  11-25.0862 84.0904  29
   3   5  10 18.4624 29.6783  24
   3   5  10 22.6632 86.2861  29
   3   5   9 88.5987 31.9367  24
   3   5   9 62.4554 90.8278  29
   3   5   9 109.521 60.1553  27
   3   5   8 35.3923 30.8532  24
   3   5   8 9.99855 95.3404  29
   3   5   8 109.703 60.4345  27
   3   5   7 112.730 94.5809  29
   3   5   7-1.77777 29.3120  24
   3   5   7 104.310 62.2769  27
   3   5   6 212.678 101.899  29
   3   5   6 179.672 62.2584  27
   3   5   5 124.754 98.4523  29
   3   5   5 100.345 60.5846  27
   3   5   4 25.8288 95.1711  29
   3   5   4 18.2636 55.5128  27
   3   5   3 256.328 68.2049  27
  -3   5  -2 270.443 37.6485  25
   3   5   2 303.354 67.0014  27
  -3   5  -1 40.4718 30.6767  25
   3   5   1 49.8341 53.8704  27
  -3   5   0-13.0264 31.8814  25
   3   5   0-22.3496 49.1884  27
  -3   5   1 49.3106 34.5311  25
  -3   5   2 268.109 45.9024  25
   3   5  -2 393.724 83.0306  34
  -3   5   3 246.579 46.3166  25
   3   5  -3 338.966 78.5827  34
  -3   5   4-14.0320 37.2690  25
   3   5  -4-40.1276 66.3419  34
  -3   5   5 39.0118 42.8561  25
   3   5  -5 62.5081 63.0902  34
  -3   5   6 200.134 47.4547  25
   3   5  -6 45.7731 59.8291  34
  -3   5   7 118.173 46.9873  25
   3   5  -7 117.550 58.2310  34
  -3   5   8 69.0446 42.9031  25
   3   5  -8 64.7217 54.2564  34
  -3   5   9 87.0531 42.4602  25
   3   5  -9 33.8808 50.2010  34
  -3   5  10 26.1512 38.5325  25
   3   5 -10-57.7881 46.9710  34
  -3   5  11-3.91201 33.5088  25
   3   5 -11 3.98770 42.2561  34
  -3   5  12 32.2533 31.7992  25
   3  -5 -12 0.76868 15.5818  22
  -3   5  13 46.8075 28.6627  25
   3  -5 -13 3.28866 13.8021  22
  -3   5  14 3.38755 23.5916  25
   3  -5 -14 23.3098 13.2385  22
   3   6  11-23.7169 30.8329  27
   3   6  10-10.6196 31.2950  27
   3   6   9 34.3159 37.1953  27
   3   6   8 20.0443 37.9898  27
   3   6   7 28.7166 40.4618  27
   3   6   6-22.6328 40.8728  27
   3   6   5 7.77847 40.3719  27
  -3   6  -4-12.2487 23.4697  25
   3   6   4-44.7160 42.2312  27
  -3   6  -3 5.72394 23.3687  25
   3   6   3-18.4241 41.4110  27
  -3   6  -2-2.98531 23.7257  25
  -3   6  -1 3.11998 24.7979  25
   3   6   1 93.1471 61.2492  34
  -3   6   0 25.9043 27.0103  25
   3   6   0 60.6423 58.9177  34
  -3   6   1 3.36525 26.6785  25
   3   6  -1-66.7962 56.7862  34
  -3   6   2-10.3793 26.6530  25
   3   6  -2-56.5686 54.7273  34
  -3   6   3 28.2860 28.8045  25
   3   6  -3 2.45474 51.0562  34
  -3   6   4-16.0174 31.4033  25
   3   6  -4 16.2794 48.3692  34
  -3   6   5-5.28780 30.0640  25
   3   6  -5 10.9097 46.3738  34
  -3   6   6-3.42061 29.2998  25
   3   6  -6 20.2257 43.6493  34
  -3   6   7 3.23769 28.4473  25
  -3   6   8 20.8564 27.3975  25
  -3   6   9-31.8463 26.4412  25
  -3   6  10-10.2400 22.3724  25
   3  -6 -10 12.1538 11.6964  22
  -3   6  11 6.51135 19.0591  25
   3  -6 -11 4.34513 10.5504  22
   3   7   5 20.3009 33.6152  34
   3   7   4-9.47726 33.6465  34
  -3   7  -3 9.56763 16.2641  25
   3   7   3-2.81759 35.3347  34
  -3   7  -2 5.50612 16.4560  25
   3   7   2-40.1544 36.9760  34
  -3   7  -1 3.83322 17.2523  25
   3   7   1-22.9300 35.4675  34
  -3   7   0-2.93645 17.8288  25
   3   7   0-15.4736 35.5669  34
  -3   7   1-4.94383 18.3870  25
  -3   7   2-12.7118 17.9828  25
  -3   7   3 10.4334 17.8010  25
  -3   7   4 10.8373 17.2538  25
  -3   7   5-1.66482 15.8182  25
  -4   0 -11-8.29709 32.0156  14
  -4   0 -11-40.7997 45.1271  19
  -4   0 -10 162.628 38.4545  14
  -4   0 -10 202.005 51.7217  19
  -4   0  -9 12.1849 29.5217  14
  -4   0  -8 2.23803 27.9236  14
  -4   0  -7 18.3449 26.6559  14
  -4   0  -6 1721.71 77.9987  14
  -4   0  -5 86.9314 28.0643  14
  -4   0  -4 3043.72 103.377  14
   4   0   4 3234.35 133.828  20
  -4   0  -3 6.92849 20.7668  14
   4   0   3 19.8035 42.9946  20
  -4   0  -2 176.063 25.9284  14
   4   0   2 152.814 48.1330  20
   4   0   1 8.21202 40.9051  20
   4   0   0 167.370 46.4782  20
   4   0  -1 22.3145 37.3664  20
   4   0  -1 1.21567 12.0501  10
   4   0  -2 122.907 19.7082  10
   4   0  -3 6.93483 14.5299  10
   4   0  -4 2647.27 89.3903  10
  -4   0   4 2428.52 79.2205  17
   4   0  -5 37.5663 18.5583  10
  -4   0   5 39.9858 20.3164  17
   4   0  -6 1383.73 65.8796  10
  -4   0   6 1253.35 58.2903  17
   4   0  -7 14.1101 14.6755  32
   4   0  -7 1.92638 18.4650  10
  -4   0   7 3.04170 21.1810  17
   4   0  -8 6.57074 15.0707  32
  -4   0   8 7.01381 24.8974  17
   4   0  -9 4.00028 15.8156  32
  -4   0   9-9.80160 25.5375  17
   4   0 -10 1.06167 15.8288  32
  -4   0  10 161.561 36.4461  17
   4   0 -11-8.93472 17.7078  32
  -4   0  11-2.52857 31.9346  17
   4   0 -12 5.78225 17.2321  32
   4   0 -13 147.495 56.4355  34
   4   0 -13 18.7129 18.1732  32
   4   0 -17-3.29833 65.9163  31
   4   0 -18-27.2456 56.6687  31
   4   0 -19 14.4666 47.0398  31
  -4   1 -12-1.56037 32.6914  26
  -4   1 -11 13.6207 32.3021  26
  -4  -1 -10 29.9222 30.9899  14
  -4  -1 -10 15.7306 21.1092  12
   4  -1  10 45.7526 51.2572  20
  -4  -1 -10 96.2124 41.6267  19
  -4   1 -10 23.0615 33.2536  26
  -4  -1  -9 2.30332 26.6609  14
  -4  -1  -9 1.49051 21.2304  12
   4  -1   9 11.7822 49.0016  20
  -4  -1  -9-2.93765 36.0468  19
  -4  -1  -8 485.344 48.3809  14
   4  -1   8 521.083 70.9580  20
  -4  -1  -8 598.225 56.8470  19
  -4  -1  -8 383.757 35.0179  12
  -4  -1  -7 37.0683 24.8462  14
   4  -1   7 31.3070 46.3324  20
  -4  -1  -6 867.134 53.4613  14
   4  -1   6 694.787 71.7714  20
  -4  -1  -5 80.5673 25.7279  14
   4  -1   5 80.6164 47.5376  20
  -4  -1  -4 291.511 31.6957  14
   4  -1   4 288.126 53.0560  20
   4  -1   3 429.199 57.1079  20
   4  -1   2 206.895 44.5447  20
  -4   1  -1 368.905 37.1376  21
   4  -1   1 418.542 52.6590  20
   4  -1   0 128.840 40.8040  20
   4   1   0 125.712 20.9743  10
   4   1  -1 312.399 29.9355  10
   4  -1  -2 208.772 39.1102  13
   4   1  -2 160.498 23.8323  10
   4  -1  -3 463.493 49.2724  13
   4   1  -3 420.988 35.5287  10
   4   1  -4 275.072 31.4065  10
   4  -1  -4 319.002 41.6736  13
   4  -1  -5 54.8502 30.2558  13
   4  -1  -5 36.2404 17.4690  10
  -4   1   5 70.7696 21.5758  17
   4  -1  -6 625.458 43.4753  10
  -4   1   6 674.492 43.4095  17
   4  -1  -7 11.6963 14.0419  32
  -4   1   7 55.5038 23.3410  17
  -4  -1   7 59.6217 25.8233  17
  -4   1   8 341.118 36.3484  17
  -4  -1   8 377.840 41.2799  17
   4  -1  -9 32.2579 16.0437  32
  -4   1   9 3.76214 26.8802  17
  -4  -1   9-6.81447 28.6898  17
   4   1 -10-4.64626 51.3577  34
   4  -1 -10 3.14999 16.7344  32
  -4   1  10 39.7243 29.2144  17
  -4  -1  10 35.8040 34.1829  17
   4   1 -11-34.5690 53.7989  34
   4  -1 -11-22.3046 17.0948  32
   4   1 -12 18.1131 52.8562  34
   4  -1 -12-6.98438 16.9929  32
   4   1 -13 13.2833 53.6829  34
   4  -1 -13 2.37136 16.7821  32
   4   1 -14-29.2029 55.0522  34
   4  -1 -14 1.16952 16.6059  32
   4   1 -15 89.8118 54.6197  34
   4  -1 -15 33.2435 17.7633  32
   4  -1 -16-113.433 71.8584  31
   4   1 -16 31.0649 68.4334  31
   4  -1 -17-67.4891 63.2411  31
   4   1 -17-17.7984 60.8774  31
   4   1 -18-33.3189 52.2754  31
  -4   1  18-87.7709 108.641  29
  -4  -2  -9 62.8913 31.1590  14
  -4  -2  -9 71.5817 25.8841  12
  -4   2  -9 85.9789 39.5053  21
  -4  -2  -9 31.3926 35.7760  19
  -4  -2  -8 603.798 51.9089  14
   4   2   8 474.098 48.3069  24
  -4  -2  -8 409.888 38.0125  12
  -4   2  -8 461.596 56.3809  21
  -4  -2  -8 517.469 55.8576  19
  -4  -2  -7 103.917 30.3227  14
  -4   2  -7 94.2919 39.9520  21
   4  -2   7 71.5440 47.1646  20
  -4  -2  -7 57.4824 34.7342  19
   4   2   7 92.9909 37.3972  24
  -4  -2  -6 229.996 33.8699  14
  -4   2  -6 132.123 39.2579  21
   4  -2   6 160.900 47.5544  20
   4   2   5 89.8988 21.5768  35
  -4   2  -5 220.118 38.5047  21
   4  -2   5 201.551 49.3117  20
  -4   2  -4 43.4672 26.7024  23
  -4   2  -4 17.5520 27.1553  21
   4  -2   4 20.1615 38.3627  20
  -4   2  -3 149.202 36.1966  21
   4  -2   3 138.950 45.9560  20
  -4   2  -2 1920.01 88.1889  21
   4  -2   2 1924.35 100.827  20
  -4   2  -1 1867.19 87.1693  21
   4  -2   1 1780.48 97.8991  20
  -4   2   0 14094.5 350.209  21
   4  -2  -1 2207.68 106.536  13
   4  -2  -2 2232.80 106.216  13
   4  -2  -3 92.6386 34.5983  13
   4  -2  -4 24.6007 26.9222  13
   4  -2  -5 251.721 41.3857  13
  -4   2   5 100.366 47.8401  28
   4   2  -6 284.738 62.0358  34
   4   2  -6 142.621 33.3159  11
  -4   2   6 171.415 52.4989  28
   4   2  -7 227.866 61.1123  34
   4   2  -7 82.7989 32.5788  11
  -4   2   7 117.296 56.6831  28
   4   2  -8 490.771 55.0017  11
   4   2  -8 237.370 61.6268  34
  -4   2   8 77.4027 61.2129  28
  -4   2   8 452.786 42.6182  17
  -4  -2   8 449.358 49.1906  17
   4  -2  -9 8.70022 14.8247  32
   4   2  -9 35.1676 30.5197  11
   4   2  -9 109.438 59.8915  34
  -4   2   9 95.3479 30.3604  17
  -4  -2   9 25.6810 32.6974  17
  -4   2  10 391.816 66.0354  33
   4   2 -10 254.449 65.0366  34
   4   2 -11 50.1435 58.8711  34
   4  -2 -11-5.42896 16.1789  32
   4  -2 -12 2.23755 15.8855  32
   4   2 -12 14.1138 57.9239  34
   4   2 -13-41.9738 58.3711  34
   4  -2 -13 22.4429 16.9151  32
   4   2 -14 51.2363 55.4213  34
   4  -2 -14 18.5055 16.6397  32
   4   2 -15 70.3055 54.2807  34
   4   2 -16 141.396 52.3724  34
  -4   2  16 4.71882 92.3508  29
  -4   2  17-72.2488 90.4644  29
   4  -2 -18-9.73700 18.1860  26
  -4   2  18 71.5145 81.7867  29
  -4   3 -17 5.62578 16.1273  23
  -4   3 -16 33.7492 20.0952  23
  -4   3 -15 28.4976 23.1571  23
   4   3  11 37.9327 35.5566  24
   4   3  10-8.53352 36.4684  24
   4   3   9 14.9270 34.3214  24
   4   3   8 10.5646 36.5891  24
   4   3   7 243.597 46.4028  24
  -4   3  -7 221.930 33.3890  23
  -4   3  -7 168.608 44.2812  21
  -4   3  -6 33.0457 27.8024  23
  -4   3  -6-2.98565 34.7251  21
  -4   3  -5 50.9157 27.6390  23
  -4   3  -5 22.9461 35.3534  21
  -4   3  -4 58.5315 27.4247  23
  -4   3  -4 55.4200 35.5701  21
  -4   3  -3 47.4682 27.6399  23
  -4   3  -3 5.40731 31.5969  21
   4   3   2-22.2563 22.6530  35
  -4   3  -2 19.0129 28.5623  23
   4  -3   2 55.9513 30.8492  13
  -4   3  -2 40.1092 35.4837  21
   4   3   1 1.06829 21.9556  35
   4  -3   1 23.2565 28.2492  13
  -4   3  -1 9.91496 28.6768  23
   4  -3   0 460.742 50.1816  13
  -4   3   0 455.150 41.9709  23
   4  -3  -1 8.50770 26.0254  13
   4  -3  -2 14.3038 26.2605  13
  -4   3   2 32.9062 40.4456  28
   4   3  -3 86.9076 72.7657  34
  -4   3   3-11.9093 41.6969  28
   4  -3  -3 52.3025 30.9730  13
   4   3  -4 123.833 71.2022  34
  -4   3   4-12.0157 45.2992  33
   4   3  -4 77.1913 33.7003  11
  -4   3   4-15.8139 43.4534  28
  -4   3   5 1.39573 46.1324  33
   4   3  -5 54.9955 30.3317  11
   4   3  -5-32.2242 68.3831  34
  -4   3   5 39.4134 45.7097  28
  -4   3   6 13.1367 48.3532  33
   4   3  -6 18.2501 30.2995  11
   4   3  -6 17.5975 66.3439  34
  -4   3   6 8.45156 47.9880  28
  -4   3   6 11.2256 30.8997  18
  -4   3   7 111.392 53.2787  33
   4   3  -7 159.358 67.5525  34
  -4   3   7 67.3843 52.0701  28
  -4   3   7 182.276 44.4774  18
   4   3  -8 17.8427 62.7578  34
  -4   3   8 38.2041 51.6200  33
  -4   3   9 33.0459 52.4946  33
   4   3  -9 2.98853 61.2338  34
   4   3 -10-38.7446 60.7866  34
  -4   3  10 8.49715 55.2061  33
   4   3 -11-29.3334 58.9026  34
  -4   3  11 39.6201 55.1409  33
   4  -3 -11 9.88041 14.1629  32
   4   3 -12-56.6589 58.0518  34
  -4   3  12-18.2710 85.2577  29
  -4   3  13 48.8860 84.7570  29
   4   3 -13 56.0478 56.8943  34
   4   3 -14-41.4494 52.7115  34
  -4   3  14-142.994 87.9977  29
   4   3 -15-19.3055 47.2982  34
  -4   3  15-26.9909 78.6432  29
   4   3 -16 64.7435 42.8208  34
  -4   3  16 27.1452 71.5106  29
  -4   3  17-2.81517 64.1546  29
  -4   4 -15 41.5789 17.8728  23
  -4   4 -14 84.4560 22.4393  23
  -4   4 -13 54.1900 23.4736  23
  -4   4 -12 16.8646 23.6948  23
  -4   4 -11 20.2013 24.7922  23
  -4   4 -10-1.10422 25.7747  23
  -4   4  -9-14.5700 25.9165  23
  -4   4  -8 17.9283 25.8186  23
  -4   4  -7 42.2307 27.2597  23
   4   4   7 85.9440 103.688  29
  -4   4  -6 357.627 36.1231  23
   4   4   6 299.558 117.272  29
  -4   4  -5 72.1708 28.6389  23
   4   4   5 106.516 73.3230  27
  -4   4  -4 985.746 51.7472  23
   4   4   4 1060.94 106.266  27
  -4   4  -3 316.113 36.7036  23
   4   4   3 451.423 85.6881  27
  -4   4  -2 95.6151 31.3356  23
   4   4   2 186.095 73.9661  27
   4   4   1 63.0318 63.8067  27
   4   4   0 3.53273 56.1525  27
   4   4  -1 296.768 88.0219  34
   4   4  -1 53.7830 54.1542  27
   4   4  -2 223.974 86.3426  34
   4   4  -3 612.289 95.0697  34
   4   4  -4 613.970 92.9080  34
  -4   4   4 611.523 60.4356  33
  -4   4   5 120.502 50.3025  33
   4   4  -5 131.947 74.4727  34
   4   4  -6 112.951 71.4122  34
  -4   4   6 179.954 51.4778  33
   4   4  -7 56.7171 64.7595  34
  -4   4   7 19.7273 47.4778  33
   4   4  -8 79.5773 62.6355  34
   4   4  -9 61.8682 61.9156  34
   4   4 -10 22.3829 57.5016  34
   4   4 -11 54.7853 55.0644  34
   4   4 -12 7.12745 50.9911  34
   4   4 -13-6.29986 45.6903  34
   4   4 -14 37.4983 41.5073  34
   4  -4 -14 73.4663 17.5687  22
   4   4 -15 38.7778 35.9267  34
  -4   4  15 82.6719 59.9336  29
   4   5  13 42.0721 38.7127  27
   4   5  12-2.27861 40.6974  27
   4   5  11 51.9516 46.6835  27
   4   5  10 37.3335 50.3661  27
   4   5   9-40.2802 50.7270  27
   4   5   8 16.3723 51.3869  27
   4   5   7 84.9570 53.9059  27
   4   5   6 72.8911 56.2940  27
   4   5   5 3.49605 51.7927  27
   4   5   4 48.7052 52.8795  27
   4   5   3 3.42665 50.7645  27
   4   5   2 3.34683 48.8560  27
   4   5   1-3.24729 48.9392  27
   4   5   0 108.713 76.0238  34
   4   5  -1-54.6319 74.6990  34
   4   5  -2 175.573 74.8303  34
   4   5  -3 124.826 68.1671  34
  -4   5   4 52.5376 38.3895  25
   4   5  -4-70.8843 65.5023  34
  -4   5   5 18.1527 38.6181  25
   4   5  -5-44.2844 61.5833  34
  -4   5   6 18.4463 39.2617  25
   4   5  -6 162.898 60.6245  34
  -4   5   7 104.974 43.3167  25
   4   5  -7 31.7657 55.1588  34
  -4   5   8 26.2863 38.3399  25
   4   5  -8 49.2892 51.6375  34
  -4   5   9-4.06639 35.6546  25
   4   5  -9-4.51579 47.3053  34
  -4   5  10-3.64203 33.1687  25
   4   5 -10-6.07896 42.6997  34
  -4   5  11 31.4084 30.6745  25
   4   5 -11-51.3263 41.8890  34
  -4   5  12 15.5828 25.1515  25
   4  -5 -12 8.46314 13.3638  22
  -4   5  13 10.1833 21.2158  25
   4   5 -13 21.2453 30.2603  34
   4  -5 -13 28.4626 12.5765  22
   4   6   9-16.4401 28.9986  27
   4   6   8 11.9039 30.7961  27
   4   6   7-13.0927 33.2063  27
   4   6   6-10.0202 35.3620  27
   4   6   5 34.4477 52.4641  34
   4   6   5 4.20322 36.3936  27
   4   6   4 69.1731 53.9064  34
   4   6   3 73.1757 55.6741  34
   4   6   2 19.6841 53.7525  34
   4   6   1-17.1649 52.9205  34
   4   6   0-9.66766 52.5868  34
   4   6  -1 25.9167 51.8831  34
  -4   6   2 34.3353 24.9312  25
   4   6  -2-116.016 52.7246  34
  -4   6   3 30.5617 25.3084  25
   4   6  -3-69.5443 48.8525  34
  -4   6   4 20.3770 26.1004  25
   4   6  -4-82.1000 46.8892  34
  -4   6   5 35.7177 26.0408  25
   4   6  -5 82.2639 43.3398  34
  -4   6   6-14.9873 25.8920  25
   4   6  -6-1.75547 38.7069  34
  -4   6   7-15.1146 24.8073  25
   4   6  -7 28.4290 36.1250  34
  -4   6   8 1.12260 22.8257  25
   4   6  -8-5.53729 32.6143  34
  -4   6   9-35.4244 21.0318  25
   4   6  -9 7.00688 28.8146  34
   5   0   8 338.621 81.4006  20
   5   0   7-29.8544 63.0939  20
   5   0   6 33.5686 60.3252  20
   5   0   5-18.5381 59.0013  20
  -5   0  -5-47.7228 59.1706  30
   5   0   4 4.50921 58.7464  20
  -5   0  -4-71.1110 57.0824  30
   5   0   3-30.5751 62.8067  20
  -5   0  -3-66.0076 55.9803  30
   5   0   2 90.1427 60.1698  20
  -5   0  -2-85.3507 55.4958  30
  -5   0  -1-131.594 54.0818  30
   5   0   0 5.15231 15.9982  10
   5   0  -1-7.16220 16.9230  10
   5   0  -2 54.5181 20.5009  10
  -5   0   2 23.7576 37.0513  28
   5   0  -3 5.95323 17.7941  10
  -5   0   3 47.4547 39.7950  28
   5   0  -4 71.8525 23.0451  10
  -5   0   4-13.4580 43.0796  28
   5   0  -5-6.73845 19.8166  10
  -5   0   5 10.9501 20.9080  17
   5   0  -6-16.8659 16.8824  32
   5   0  -6-7.15142 22.0418  10
  -5   0   6 6.67931 22.0786  17
   5   0  -7 9.85186 17.1341  32
   5   0  -7-2.53062 21.2002  10
  -5   0   7 9.26277 26.3876  17
   5   0  -8 40.9346 18.7443  32
  -5   0   8 276.694 37.7363  17
   5   0  -9-9.41444 17.5863  32
   5   0 -10-7.24553 18.1999  32
   5   0 -11-18.3250 17.9437  32
   5   0 -12-15.7367 18.0401  32
   5   0 -13-15.1632 17.4325  32
   5   0 -14-19.5143 17.2366  32
   5   0 -15 22.1286 15.5291  32
   5   0 -17-53.6566 56.0507  31
  -5  -1  -8 31.8079 32.5296  14
   5  -1   8 5.13289 60.2583  20
   5   1   8 30.9043 70.0633  20
  -5  -1  -7 123.899 36.6706  14
   5  -1   7 73.9453 59.7576  20
  -5  -1  -6-2.29977 29.2815  14
   5  -1   6 28.3417 59.1798  20
  -5  -1  -6 143.267 56.5742  30
   5  -1   5 54.3012 56.7420  20
  -5   1  -5 161.869 64.6404  30
  -5  -1  -5 153.846 55.7869  30
   5  -1   4 392.646 69.9887  20
  -5   1  -4 227.513 64.4902  30
  -5  -1  -4 241.951 55.3750  30
  -5   1  -3 233.516 38.1510  21
   5  -1   3 332.281 67.7260  20
  -5   1  -3 169.826 61.6774  30
  -5  -1  -3 154.895 52.8097  30
   5  -1   2 3.97837 49.2415  20
   5   1   2 57.6319 23.5365  35
  -5   1  -2 56.9310 59.4231  30
  -5  -1  -2 132.808 51.7126  30
  -5   1  -2 35.6858 37.7235  28
   5  -1   1 198.307 56.6954  20
  -5   1  -1 168.909 59.3251  30
  -5  -1  -1 159.149 50.9934  30
   5   1   1 64.2144 24.4536  35
  -5   1  -1 76.5760 38.4144  28
  -5   1   0 216.951 59.3317  30
  -5  -1   0 126.982 49.6848  30
   5   1   0 4.18827 22.7784  35
  -5   1   0 93.5997 39.1241  28
   5   1  -1 48.8006 24.7136  35
  -5   1   1 97.2607 57.5600  30
  -5   1   1 103.362 39.6684  28
   5  -1  -2 18.1608 37.1534  13
  -5   1   2 36.6922 57.9223  30
   5   1  -2 2.03507 17.9545  10
  -5   1   2-19.6810 40.2822  28
   5  -1  -3 237.284 31.6648  10
   5   1  -3 239.125 32.9823  10
   5  -1  -4 443.172 41.5252  10
  -5   1   4 89.4255 46.4354  28
   5  -1  -5-0.89744 13.9369  32
   5  -1  -5 17.9623 21.9649  10
  -5   1   5-25.8798 47.2683  28
   5  -1  -6-10.4101 14.4615  32
   5  -1  -6 35.5864 22.7398  10
  -5   1   6-19.9105 53.1193  28
  -5  -1   6 11.0348 24.0487  17
   5  -1  -7 1.99843 15.1611  32
   5   1  -7 21.6537 18.7946  32
   5  -1  -7 120.748 29.6763  10
  -5  -1   7 124.211 31.6303  17
   5  -1  -8-6.31863 15.7369  32
   5   1  -8-3.64792 18.1706  32
  -5   1   8 5.79690 25.6413  17
  -5  -1   8 6.81724 30.0451  17
   5  -1  -9 23.1762 16.8661  32
   5   1  -9-1.22410 17.4373  32
   5  -1 -10 26.3294 17.0107  32
   5   1 -10 1.22114 17.4505  32
   5  -1 -11-14.0287 17.2188  32
   5   1 -11-1.19979 16.5995  32
   5  -1 -12 7.01099 16.5920  32
   5  -1 -13-1.13598 15.3450  32
   5  -1 -14-2.13393 15.7145  32
   5  -1 -15 36.5018 16.0376  32
   5  -1 -16 14.2381 60.8637  31
   5   1 -16-50.0758 59.3780  31
   5  -1 -17-9.12813 52.3235  31
   5   1 -17 15.4538 48.9320  31
  -5   2 -16 5.04770 16.8818  23
  -5   2 -15 38.6593 21.7347  23
  -5   2 -14 27.8023 23.2271  23
  -5   2  -9 17.5800 27.8671  23
   5   2   8-3.46083 22.9808  35
  -5   2  -8 5.77323 27.1405  23
   5   2   7 52.8355 25.1119  35
  -5   2  -7 46.4218 29.3503  23
  -5   2  -6 36.6781 29.8771  23
  -5   2  -6 49.9166 38.4496  21
   5  -2   6 43.4410 51.2362  20
   5   2   6 22.8250 24.1963  35
  -5   2  -5 20.8488 28.3249  23
  -5   2  -5 11.7710 34.2285  21
   5  -2   5 20.8634 50.3289  20
   5   2   5 39.7035 23.5297  35
   5   2   4 64.4077 25.1561  35
  -5   2  -4 15.3083 27.8790  23
  -5   2  -4 64.1228 35.9169  21
   5  -2   4-4.00507 48.5231  20
  -5   2  -3 68.3478 29.8558  23
  -5   2  -3 85.2825 35.5861  21
   5  -2   3 59.0053 50.0886  20
  -5   2  -3 79.7780 67.3058  30
   5   2   3 31.6124 24.0221  35
   5   2   2 93.9425 25.8727  35
  -5   2  -2 297.183 35.6178  23
  -5   2  -2 282.522 45.2967  21
  -5   2  -2 40.1287 65.6269  30
  -5   2  -1 9.31262 30.9785  23
   5   2   1 7.96674 23.7409  35
   5   2   0-4.58807 23.5728  35
   5  -2   0 3.82568 34.8410  13
  -5   2   0-7.30767 31.8223  23
  -5   2   0 35.8855 41.0386  28
   5   2  -1 27.7805 24.5712  35
   5  -2  -1 48.3149 36.3607  13
  -5   2   1-15.5140 40.7942  28
   5  -2  -2 422.310 56.6862  13
  -5   2   2 78.4199 43.1729  28
  -5   2   3 101.104 44.4503  28
   5  -2  -3 74.0683 36.9873  13
   5  -2  -4 27.9440 34.4031  13
  -5   2   4 33.4202 46.7339  28
   5  -2  -5 16.9323 22.1990  10
  -5   2   5-23.7629 47.8489  28
  -5   2   6 30.5896 51.1505  28
  -5   2   7-46.5771 54.1691  28
   5  -2  -8 4.88539 14.6012  32
  -5   2   8 23.4755 57.0533  28
   5  -2  -9-2.04066 14.6699  32
  -5   2   9-13.9890 60.1341  28
   5   2 -10-49.7707 57.8464  34
  -5   2  10-41.6867 54.0193  33
   5  -2 -10 17.8623 16.0570  32
   5   2 -11-16.4708 55.2103  34
  -5   2  11-7.05795 55.2725  33
   5  -2 -11 9.55779 15.1746  32
   5   2 -12-42.7168 55.2814  34
   5  -2 -12 17.8186 15.9311  32
   5   2 -13-53.1380 53.7032  34
   5  -2 -13 11.0526 15.0152  32
   5   2 -14 44.1612 51.2555  34
   5   2 -15 182.888 50.5429  34
  -5   2  15-11.0708 76.3359  29
  -5   2  16-70.9712 71.6086  29
  -5   2  17 65.6002 63.3094  29
  -5   3 -15 1.27656 16.6769  23
  -5   3 -14 29.9598 20.4151  23
  -5   3 -13 31.1733 22.5335  23
  -5   3 -12 36.6656 24.7398  23
  -5   3 -11 8.72729 25.1950  23
  -5   3 -10 24.9821 25.7873  23
  -5   3  -9 28.9274 26.0167  23
  -5   3  -8 45.3269 27.2709  23
  -5   3  -7 11.5818 26.8129  23
  -5   3  -6 13.8208 26.8853  23
  -5   3  -5 90.7412 29.1470  23
   5   3   5 23.9038 24.7692  35
  -5   3  -4 151.095 31.7506  23
   5   3   4 47.1310 26.2126  35
   5   3   3-46.3262 25.9546  35
  -5   3  -3-10.5258 30.1904  23
   5   3   2-8.59714 24.6626  35
   5  -3   2 33.6354 35.3212  13
  -5   3  -2 18.0007 28.5323  23
   5  -3   1 87.8736 37.9111  13
  -5   3  -1-4.98764 30.8326  23
   5  -3   0 18.0775 32.4184  13
   5  -3  -1 17.6487 31.1430  13
  -5   3   2 24.0087 44.3569  28
   5  -3  -2 70.4500 36.4836  13
  -5   3   3-34.9068 44.9221  28
  -5   3   4 111.210 53.7042  33
  -5   3   4 96.7443 47.4816  28
  -5   3   5 75.5851 53.9057  33
  -5   3   5 39.9073 46.8388  28
   5   3  -6 30.6307 63.8008  34
  -5   3   6-31.9506 50.2704  33
  -5   3   6-22.5918 47.7228  28
   5   3  -7 36.5414 64.7198  34
  -5   3   7 11.2842 50.9553  33
  -5   3   7 12.9921 48.5208  28
   5   3  -8-9.03605 60.7686  34
  -5   3   8-1.61534 49.8715  33
   5   3  -9-17.7158 59.8500  34
  -5   3   9-3.20611 50.0850  33
   5   3 -10 25.7060 59.8411  34
  -5   3  10-34.5306 48.4262  33
   5   3 -11-35.2795 56.6088  34
  -5   3  11 15.0872 49.9206  33
   5   3 -12 5.04071 52.1879  34
  -5   3  12 32.5232 48.7657  33
   5   3 -13-31.8548 50.3046  34
   5   3 -14 25.7694 46.0014  34
   5   3 -15 123.404 42.4033  34
  -5   3  15-38.3920 59.1246  29
  -5   4 -13-3.30690 17.6639  23
  -5   4 -12-14.1180 20.0300  23
  -5   4 -11-7.07317 21.7215  23
  -5   4 -10 20.1791 23.2077  23
  -5   4  -9 18.2985 23.4806  23
  -5   4  -8 17.9344 23.9554  23
  -5   4  -7 39.9903 25.5349  23
  -5   4  -6 86.8730 27.2141  23
  -5   4  -5-4.46530 24.9986  23
  -5   4  -4 6.81106 25.7423  23
  -5   4  -3 277.190 32.8596  23
   5   4  -1 175.809 83.3900  34
   5   4  -2 299.505 82.8951  34
   5   4  -3 306.404 80.2903  34
   5   4  -4 52.5796 70.4407  34
   5   4  -5 44.7591 66.2980  34
  -5   4   5 2.97157 48.9905  33
   5   4  -6 105.236 64.3847  34
  -5   4   6 30.9347 48.2697  33
   5   4  -7 17.8489 60.2069  34
   5   4  -8 42.4488 58.6896  34
   5   4  -9 23.8971 54.8993  34
   5   4 -10-12.2375 52.0916  34
   5   4 -11-83.8163 50.3552  34
   5   4 -12-25.1051 44.3351  34
   5   4 -13-40.6425 39.1372  34
   5   4 -14 55.3642 34.0650  34
   5   5  10-25.5071 36.3549  27
   5   5   9 13.3537 38.3766  27
   5   5   8 4.88782 41.4099  27
   5   5   7-2.61642 42.6250  27
   5   5   6 19.1979 46.9850  27
   5   5   5 56.4649 46.9928  27
   5   5   4-22.8884 46.6127  27
   5   5   3 95.7324 67.3334  34
   5   5   3-31.4647 46.4881  27
   5   5   2 54.4779 66.5660  34
   5   5   1-33.3241 65.6506  34
   5   5   0-21.0306 63.5834  34
   5   5  -1-17.7169 62.8470  34
   5   5  -2-77.7934 62.3698  34
   5   5  -3-5.57826 57.9234  34
   5   5  -4-21.4160 55.5139  34
   5   5  -5 66.1607 54.7815  34
   5   5  -6 2.39124 49.3654  34
   5   5  -7 4.43220 47.3650  34
   5   5  -8-22.2071 44.2223  34
   5   5  -9 12.5954 40.2431  34
   5   5 -10-57.6395 38.1675  34
   5   5 -11-45.2450 33.1831  34
   5   6   5 39.9774 38.8026  34
   5   6   4-14.4476 40.7105  34
   5   6   3 18.6615 42.2488  34
   5   6   2 5.26592 42.9862  34
   5   6   1 8.91665 41.9185  34
   5   6   0-65.9457 44.3127  34
   5   6  -1 10.5236 42.4937  34
   5   6  -2 30.5972 39.0269  34
   5   6  -3-22.7011 37.6298  34
   5   6  -4 24.3228 35.9415  34
   5   6  -5-11.1734 33.2448  34
   5   6  -6 37.5352 32.2067  34
   6   0  15 31.0095 21.5459  35
  -6   0  -6 205.955 68.6678  30
  -6   0  -5 58.2363 66.7129  30
  -6   0  -4 111.036 66.4796  30
   6   0   3 29.1644 28.6905  35
  -6   0  -3-18.9128 64.9990  30
  -6   0  -2-20.4348 63.5012  30
  -6   0  -1-54.7296 62.4737  30
  -6   0  -1 6.82207 40.9118  28
  -6   0   0 63.3013 60.6503  30
  -6   0   0 72.0346 41.9232  28
  -6   0   1 31.7004 59.9406  30
  -6   0   1 30.2977 42.7507  28
   6   0  -2 10.4372 23.2096  10
  -6   0   2 13.5987 43.2553  28
  -6   0   3-46.0690 45.8036  28
  -6   0   4-1.16358 47.9344  28
   6   0  -5 7.33049 17.8880  32
  -6   0   5-68.5300 51.0784  28
   6   0  -6-22.2867 18.6653  32
   6   0  -7 11.2658 17.8871  32
   6   0  -8-3.77509 17.6971  32
   6   0  -9 2.50589 17.5068  32
   6   0 -10-9.84053 17.4667  32
   6   0 -11-17.7690 17.2961  32
   6   0 -12 12.2388 16.8168  32
   6   0 -13-5.06017 15.3805  32
   6   0 -14 2.64730 13.6311  32
   6   0 -15 7.23355 12.5800  32
   6   0 -16-67.8247 51.7575  31
   6   1  13 36.6103 24.0933  35
   6   1  12 36.0940 24.3335  35
   6   1  11 71.5013 26.5341  35
   6   1   8 83.1385 27.9803  35
   6   1   7 28.4309 27.3179  35
  -6  -1  -7-11.8860 60.7305  30
   6   1   6 80.2820 28.5351  35
  -6   1  -6 37.6217 72.2528  30
  -6  -1  -6-3.99623 60.1227  30
   6   1   5 81.8609 28.9377  35
  -6   1  -5-18.2750 71.3081  30
  -6  -1  -5 4.96895 59.9303  30
   6   1   4 31.4399 27.8374  35
  -6   1  -4-19.2579 72.0726  30
  -6  -1  -4-77.3591 60.4445  30
   6   1   3 2.73939 27.7648  35
  -6   1  -3 8.24019 70.0233  30
  -6  -1  -3 59.4880 59.8377  30
   6   1   2 20.5923 28.4490  35
   6  -1   2 129.462 67.2171  20
  -6   1  -2 104.257 69.7147  30
  -6  -1  -2 189.487 60.4564  30
  -6   1  -2 24.0466 44.4088  28
   6   1   1 49.5242 29.5913  35
  -6   1  -1 193.955 69.2524  30
  -6  -1  -1 76.1895 58.9071  30
  -6   1  -1 22.0025 44.7095  28
  -6   1   0 179.562 68.1288  30
  -6  -1   0 89.2601 59.4188  30
  -6   1   0 46.4934 45.0978  28
   6   1   0 5.50624 29.0618  35
  -6   1   1 173.244 66.5706  30
  -6  -1   1 62.3868 57.8270  30
  -6   1   1-1.07464 45.3050  28
  -6   1   2 67.8459 65.4457  30
  -6   1   2-22.0676 44.8497  28
  -6  -1   2 132.315 44.7843  28
  -6   1   3 25.1666 45.3621  28
  -6  -1   3 49.9522 45.1267  28
  -6   1   4 26.3253 46.5136  28
   6  -1  -5-22.1372 16.4627  32
  -6   1   5-18.9078 49.0176  28
   6  -1  -6-10.8401 15.9196  32
   6   1  -6-6.90895 19.8676  32
  -6   1   6-7.99600 49.7919  28
   6  -1  -7-12.2130 16.0617  32
   6   1  -7 34.0951 20.8407  32
  -6   1   7 68.9259 54.4900  28
   6  -1  -8-20.3240 16.9687  32
   6   1  -8 33.4236 19.9211  32
   6  -1  -9-1.13595 15.9238  32
   6   1  -9-2.59311 18.6987  32
   6  -1 -10-3.37749 15.7328  32
   6   1 -10-24.7597 19.0226  32
   6  -1 -11 8.75307 15.8784  32
   6   1 -11 20.8289 17.7812  32
   6  -1 -12-7.26194 15.8542  32
   6   1 -12-13.6675 16.3282  32
   6  -1 -13-2.86176 14.3764  32
   6  -1 -14 15.1826 13.9741  32
   6   2  10-9.36227 23.5746  35
   6   2   9 18.4770 24.6200  35
   6   2   8 10.2282 24.6823  35
  -6  -2  -8 65.9630 53.3963  30
   6   2   7 3.93892 25.3899  35
  -6  -2  -7 83.0825 54.6034  30
   6   2   6 21.4058 26.2269  35
  -6  -2  -6 74.7472 54.5981  30
   6   2   5 17.6240 26.1724  35
  -6  -2  -5 44.6506 55.1554  30
   6   2   4-20.5287 27.3951  35
  -6  -2  -4 38.0667 55.3481  30
   6   2   3-15.1589 26.7823  35
  -6  -2  -3 81.9184 55.3304  30
   6   2   2 18.0048 27.3293  35
  -6  -2  -2 80.8831 55.4863  30
   6   2   1 1.38954 27.1436  35
  -6  -2  -1 80.6298 55.0317  30
   6   2   0 8.34802 27.7639  35
  -6  -2   0 76.8808 54.9577  30
  -6   2   0 11.3694 44.4908  28
  -6   2   1 1.14915 44.8168  28
  -6   2   2 21.0006 45.5984  28
  -6   2   3-11.9040 45.4024  28
  -6   2   4 3.65999 46.9571  28
  -6   2   5-7.52347 45.8976  28
  -6   2   6-38.6704 47.7469  28
   6   2  -7 9.47223 19.3373  32
  -6   2   7 55.4431 49.2770  28
   6   2  -8 8.93368 18.0075  32
  -6   2   8 28.1267 49.9050  28
  -6   2   9 34.6123 51.5392  33
   6  -2  -9 10.7366 14.7539  32
  -6   2   9 32.0695 50.8076  28
  -6   2  10-18.2925 49.5490  33
   6  -2 -10 9.60100 14.4295  32
  -6   2  11-11.5915 48.2523  33
   6  -2 -11 32.3364 14.7705  32
  -6   2  12 24.1067 48.2925  33
   6  -2 -12 2.59688 13.3359  32
   6  -2 -13 0.78474 12.5362  32
  -6   3 -13-9.95987 16.7306  23
  -6   3 -12-9.89660 18.4190  23
  -6   3 -11 7.29644 20.0853  23
  -6   3 -10 39.4639 21.8148  23
  -6   3  -9 37.6750 23.2890  23
  -6   3  -8 41.8269 24.7364  23
  -6  -3  -8 79.6118 47.1751  30
   6   3   7-39.0230 23.5180  35
  -6   3  -7-4.24976 24.2137  23
   6   3   6 50.4550 25.1499  35
  -6   3  -6 10.9709 26.2769  23
  -6   3  -5 319.247 34.6239  23
  -6  -3  -5 335.103 55.3998  30
   6   3   4 48.4870 25.7066  35
  -6   3  -4 110.132 29.5538  23
  -6  -3  -1 487.518 60.2627  30
  -6   3   1 312.124 51.5803  28
  -6   3   2 369.083 52.5263  28
  -6   3   3 103.578 45.8148  28
  -6   3   4 196.268 48.1443  28
  -6   3   5 275.841 60.2557  33
  -6   3   5 188.267 47.2104  28
  -6   3   6 23.2846 52.4585  33
  -6   3   6-8.15417 43.4432  28
  -6   3   7 15.0243 49.1890  33
  -6   3   8 51.6986 47.4172  33
  -6   3   9 5.41043 45.4282  33
  -6   3  10 50.0357 43.9287  33
  -6   3  11 15.8114 39.5498  33
  -6   4 -10-13.9147 18.5168  23
  -6   4  -9-2.33303 19.8195  23
  -6  -4  -9-20.0511 36.6223  30
  -6   4  -8-17.7515 20.9648  23
  -6  -4  -8 12.9791 39.6173  30
  -6  -4  -7-61.4377 43.1450  30
  -6  -4  -6 93.4818 46.0784  30
   6   4  -9-46.0936 45.6201  34
   6   4 -10 1.69525 40.3053  34
   6   4 -11-24.4465 36.8311  34
  -6  -5  -7-9.24770 32.0408  30
  -6  -5  -6 39.5981 34.7787  30
  -6  -5  -5-2.27420 36.6694  30
  -6  -5  -4 94.3068 39.7815  30
  -6  -5  -3 30.1484 40.1710  30
  -6  -5  -2-29.9944 41.1582  30
   6   5  -5 41.4059 40.7481  34
   6   5  -6-20.6720 38.7362  34
   6   5  -7-30.0083 35.8817  34
   7   0  13-8.38879 19.6048  35
   7   0  12 7.69758 21.2160  35
   7   0  11 11.7711 22.8725  35
   7   0  10 22.1438 24.2078  35
   7   0   9 34.9669 25.1656  35
   7   0   8 33.0080 26.5207  35
   7   0   7 44.1690 27.9489  35
  -7   0  -7 43.6534 63.0079  30
   7   0   6 61.4520 29.8807  35
  -7   0  -6 67.4205 65.5013  30
   7   0   5 8.80354 28.3233  35
  -7   0  -5 40.4693 65.2152  30
  -7   0  -4 21.0151 64.8248  30
  -7   0  -4 16.9944 41.2861  28
  -7   0  -3 95.3723 66.2301  30
  -7   0  -3 5.40449 41.7151  28
  -7   0  -2-18.3747 63.4083  30
  -7   0  -2 41.5816 42.5887  28
  -7   0  -1 126.373 64.2872  30
  -7   0  -1-64.1524 42.7374  28
  -7   0   0-17.7064 62.1290  30
  -7   0   0-22.3861 42.2026  28
  -7   0   1 23.8942 62.1844  30
  -7   0   1 6.81597 42.8496  28
   7   0  -2 1.24565 17.0612  32
  -7   0   2-76.3806 44.6203  28
   7   0  -3 31.2214 18.6208  32
  -7   0   3 47.3269 45.1310  28
   7   0  -4-11.2259 17.4863  32
  -7   0   4-9.69828 45.2115  28
   7   0  -5-8.67805 17.7137  32
  -7   0   5 64.5386 47.5435  28
   7   0  -6 20.8110 18.4540  32
   7   0  -7-9.58579 17.3873  32
   7   0  -8-2.31858 16.6677  32
   7   0  -9 11.0486 16.4644  32
   7   0 -10-2.06571 16.0397  32
   7   0 -11 1.88359 14.7796  32
   7   0 -12-4.15273 13.5959  32
   7   0 -13 19.5132 12.7483  32
   7   1  13 6.26178 19.4726  35
   7  -1  13 11.7982 17.8852  35
   7   1  12-25.8021 21.5106  35
   7  -1  12 6.84942 19.4882  35
   7   1  11 4.15603 22.4234  35
   7  -1  11 10.5582 20.7997  35
   7   1  10 36.5429 24.1443  35
   7   1   9 39.4266 26.3085  35
   7   1   8 22.2658 26.0111  35
   7   1   7-41.2595 27.4921  35
  -7  -1  -7 23.8522 55.7446  30
   7   1   6-24.2969 28.2900  35
  -7   1  -6-60.3965 69.1241  30
  -7  -1  -6 40.1391 57.2978  30
   7   1   5 14.7207 28.2699  35
  -7  -1  -5-37.2101 59.7754  30
   7   1   4-9.02545 28.2395  35
  -7   1  -4-85.3570 71.3813  30
  -7  -1  -4-134.150 61.0519  30
   7   1   3-22.8867 29.8593  35
  -7   1  -3-95.2396 71.0215  30
  -7  -1  -3-26.2647 60.3762  30
   7   1   2 18.4346 28.9346  35
  -7   1  -2-77.8330 70.4037  30
  -7  -1  -2 33.4405 59.8553  30
  -7   1  -2-28.5346 43.7994  28
  -7  -1  -2 59.9897 40.5265  28
   7   1   1-4.60318 29.3637  35
  -7   1  -1-25.3792 67.5308  30
  -7  -1  -1 42.4215 59.1126  30
  -7   1  -1 16.0980 44.7882  28
  -7  -1  -1 21.4070 40.3550  28
  -7   1   0-17.6623 65.4186  30
  -7  -1   0 89.9729 59.3977  30
  -7   1   0-69.3773 44.0428  28
  -7  -1   0 8.71769 40.7145  28
  -7   1   1-19.7761 43.4644  28
  -7  -1   1 44.4892 41.5185  28
  -7   1   2-2.34461 43.0125  28
  -7  -1   2-9.11008 41.9792  28
  -7   1   3-9.46803 43.3617  28
  -7  -1   3-5.84437 44.0102  28
   7   1  -4 15.5075 19.9568  32
  -7   1   4 26.3069 44.4939  28
   7   1  -5-8.25429 19.5954  32
  -7   1   5 38.6078 44.9744  28
   7   1  -6-10.6544 19.5001  32
  -7   1   6 1.21115 45.0860  28
   7  -1  -7-15.5376 15.3493  32
   7   1  -7-20.4175 19.0719  32
  -7   1   7-6.01401 45.1458  28
   7  -1  -8-5.05907 14.6815  32
   7   1  -8 1.20658 16.9688  32
   7  -1  -9-13.6202 15.7422  32
   7   1  -9-34.7662 17.7875  32
  -7   1  10-8.95922 45.0287  33
   7  -1 -10 11.9232 14.4694  32
   7   1 -10 14.2720 16.1644  32
  -7   1  11-38.7716 44.1773  33
   7  -1 -11-6.74733 13.5421  32
   7   1 -11-8.99249 14.8956  32
  -7   1  12 8.25013 40.8554  33
   7  -1 -12 24.0146 13.2691  32
   7   1 -12-12.9068 12.9216  32
   7  -1 -13-0.63623 11.1802  32
   7   2  10-28.7661 21.5892  35
   7   2   9 7.42726 22.4873  35
   7   2   8-51.7338 24.7869  35
  -7  -2  -8 41.4767 47.7018  30
   7   2   7-9.80372 24.0589  35
  -7  -2  -7-50.1473 50.4901  30
   7   2   6-20.6219 25.9722  35
  -7  -2  -6-96.9708 53.2297  30
   7   2   5-25.4640 26.8816  35
  -7  -2  -5-106.504 54.9488  30
   7   2   4 26.2179 27.6651  35
  -7  -2  -4-132.645 56.2922  30
   7   2   3-43.6553 28.1538  35
  -7  -2  -3-14.2098 55.2373  30
  -7  -2  -2-37.1354 55.8946  30
  -7  -2  -1-87.4854 57.9886  30
  -7   2  -1 4.56672 44.2110  28
  -7  -2   0-89.8131 57.2241  30
  -7   2   0 11.4810 43.7534  28
  -7   2   1-57.4030 43.9229  28
  -7  -2   1 16.2531 41.9397  28
  -7   2   2 19.4506 42.7892  28
  -7   2   3 26.1607 42.3833  28
  -7   2   4-22.5499 42.2821  28
   7   2  -5-14.9329 20.1115  32
  -7   2   5 60.0922 41.6914  28
  -7   2   6-20.0934 49.6301  33
   7   2  -6 42.0831 20.4803  32
  -7   2   6-1.09059 40.7319  28
  -7   2   7 6.84714 45.7061  33
   7   2  -7-10.6276 17.4942  32
  -7   2   7 8.45508 40.1324  28
  -7   2   8-12.8958 44.8515  33
   7   2  -8-1.07385 16.2291  32
  -7   2   8 19.1241 40.3107  28
  -7   2   9-4.77977 41.5832  33
   7   2  -9-16.2122 15.6880  32
  -7   2  10-31.4286 39.1413  33
  -7   2  11-10.4790 36.1423  33
  -7   2  12 20.6549 32.2709  33
  -7  -3  -8-47.0222 40.3501  30
  -7  -3  -7 66.6481 43.7059  30
  -7  -3  -6-13.8814 45.4815  30
  -7  -3  -5 41.1199 47.7930  30
  -7  -3  -4 133.600 50.0852  30
  -7  -3  -3 41.6479 50.1321  30
  -7  -3  -2-34.7083 50.8755  30
  -7  -3  -1-2.55403 51.1502  30
  -7   3   1 12.1527 40.0399  28
  -7   3   2 31.1893 39.6361  28
  -7   3   3 10.8822 38.7927  28
  -7   3   4 44.3350 37.5989  28
   7   3  -5 19.4514 17.1385  32
  -7   3   5 30.6872 37.2151  28
  -7   3   6 29.6480 43.5365  33
  -7   3   7 49.7079 41.3022  33
  -7   3   8 21.1571 37.4373  33
  -7   3   9 17.0415 34.6869  33
  -7  -4  -7-83.5642 34.6013  30
  -7  -4  -6 32.6891 36.4568  30
  -7  -4  -5-8.32711 39.0909  30
  -7  -4  -4-71.5823 41.4293  30
  -7  -4  -3-47.5717 42.9046  30
  -7  -4  -2-16.9028 44.0406  30
   8   0  10-25.1463 18.1546  35
   8   0   9-0.83011 19.4671  35
   8   0   8-0.92765 20.7997  35
   8   0   7-16.1958 22.2626  35
  -8   0  -5-116.040 55.0980  30
  -8   0  -4-62.3252 56.0813  30
  -8   0  -4 10.3776 36.0661  28
  -8   0  -3-24.2192 56.6209  30
  -8   0  -3-10.9297 37.2962  28
  -8   0  -2-81.0345 56.7282  30
  -8   0  -2-35.8512 38.5271  28
  -8   0  -1-62.1056 57.6713  30
  -8   0  -1 28.0087 38.4950  28
  -8   0   0 44.8317 57.0258  30
  -8   0   0-8.82206 37.9556  28
  -8   0   1-36.5628 37.9269  28
  -8   0   2 29.7050 38.3122  28
  -8   0   3 60.1151 38.6140  28
   8   0  -4-10.7284 15.3060  32
  -8   0   4 23.3284 38.5865  28
   8   0  -5-15.2302 14.8639  32
  -8   0   5-23.6424 38.6364  28
   8   0  -6-21.9862 15.1446  32
   8   0  -7-5.20375 14.2313  32
   8   0  -8 21.7255 13.8811  32
   8   0  -9-4.36156 12.6149  32
  -8   0  10-29.8563 32.4707  33
   8   0 -10 5.05370 11.3727  32
   8   1   9-15.3973 19.5074  35
   8   1   7-36.1505 22.7792  35
  -8  -1  -7-0.67748 43.7928  30
   8   1   6-12.9769 23.8128  35
  -8  -1  -6 36.3201 47.3820  30
  -8  -1  -6-9.06883 31.2934  28
   8   1   5 2.28900 24.0137  35
  -8  -1  -5-14.6946 49.1267  30
  -8  -1  -5 23.8291 32.5472  28
   8   1   4-22.6449 25.3679  35
  -8  -1  -4 25.7533 51.4314  30
  -8  -1  -4-14.8560 34.0525  28
  -8  -1  -3-17.6980 51.3792  30
  -8  -1  -3 4.34974 34.7714  28
  -8  -1  -2-19.7540 52.8111  30
  -8   1  -2 24.1629 38.2564  28
  -8  -1  -2-29.8514 36.6438  28
  -8  -1  -1 38.6826 54.2880  30
  -8   1  -1 33.3108 38.7336  28
  -8  -1  -1-71.6892 38.0510  28
  -8  -1   0-8.02463 53.0188  30
  -8   1   0 2.88572 37.5778  28
  -8  -1   0-24.7129 38.0520  28
   8   1  -1 4.46809 16.7873  32
  -8   1   1 53.9088 38.7068  28
  -8  -1   1-40.4665 38.2013  28
   8   1  -2 4.45465 16.3061  32
  -8   1   2-63.0668 38.1017  28
   8   1  -3 4.38763 16.3451  32
  -8   1   3 7.52846 36.3767  28
   8   1  -4 16.0042 16.6574  32
  -8   1   4-24.7975 35.9988  28
   8   1  -5 21.4991 16.1924  32
  -8   1   5-25.6849 35.5143  28
   8   1  -6-3.86889 14.9819  32
  -8   1   6-38.6165 35.2406  28
  -8   1   7-5.04768 36.8467  33
   8   1  -7 8.96900 14.4353  32
  -8   1   7-10.0701 33.2394  28
  -8   1   8-5.56779 35.3768  33
   8   1  -8 0.81218 13.7003  32
  -8   1   9-4.14292 32.0427  33
   8  -1  -9 4.84570 10.9694  32
   8   1  -9 7.82748 12.4271  32
  -8  -2  -7 62.1623 38.6112  30
  -8  -2  -7 25.2959 25.7971  28
  -8  -2  -6 25.3168 40.5895  30
  -8  -2  -6 7.43235 27.2959  28
  -8  -2  -5 31.0528 43.0558  30
  -8  -2  -5 41.2331 29.5495  28
  -8  -2  -4 94.5653 45.6870  30
  -8  -2  -4 60.2275 32.4097  28
  -8  -2  -3 109.129 47.5500  30
  -8  -2  -3 48.9455 32.9031  28
  -8  -2  -2 31.2528 48.0866  30
  -8  -2  -2 65.2377 34.3417  28
  -8  -2  -1 12.6141 48.3955  30
  -8  -2  -1-30.7116 34.8803  28
  -8   2   0-0.85578 35.9899  28
  -8  -2   0 26.1378 35.7984  28
  -8   2   1 18.8408 34.6931  28
  -8  -2   1 14.0678 36.9769  28
   8   2  -2 3.23467 16.4776  32
  -8   2   2 38.8505 34.0130  28
   8   2  -3 14.5911 16.7001  32
  -8   2   3 79.7726 33.9473  28
   8   2  -4 17.8369 16.3798  32
  -8   2   4 26.8834 32.5631  28
   8   2  -5 29.6010 15.7853  32
  -8   2   5 2.24758 30.7393  28
   8   2  -6-10.9831 13.7980  32
  -8   2   6 0.69659 29.1783  28
  -8   2   7-11.4545 33.1966  33
   8   2  -7-18.0067 13.4850  32
  -8   2   8-16.7240 29.3297  33
   8   2  -8-10.8778 11.6572  32
  -8  -3  -5 56.7785 35.4792  30
  -8  -3  -5 51.2245 26.0656  28
  -8  -3  -4 65.5494 38.3995  30
  -8  -3  -4 9.58636 27.1117  28
  -8  -3  -3 19.8442 39.8063  30
  -8  -3  -3 5.13151 28.7836  28
  -8  -3  -2 3.09920 40.8573  30
  -8  -3  -2 14.0993 30.0896  28
  -8  -3  -1 10.3164 31.2412  28
   8   3  -2 21.2247 13.9610  32
   8   3  -3 10.6871 13.4160  32
   8   3  -4 6.94630 12.2072  32
  -9   0  -1-14.0036 25.2081  28
  -9   0   0-15.0004 25.5851  28
  -9   0   1-22.6138 26.2690  28
  -9   0   2 13.0832 25.5668  28
   0   0   0    0.00    0.00   0
;
_shelx_hkl_checksum                42785
_olex2_submission_special_instructions  'No special instructions were received'
_oxdiff_exptl_absorpt_empirical_details
;
Empirical correction (ABSPACK) includes:
- Absorption correction using spherical harmonics
- Frame scaling
;
_oxdiff_exptl_absorpt_empirical_full_max  4.650
_oxdiff_exptl_absorpt_empirical_full_min  0.340
loop_
  _twin_individual_id
  _twin_individual_mass_fraction_refined
 1 0.376(15)
 2 0.624(15)

# start Validation Reply Form
_vrf_PLAT029_UAD_+30_uracdih_303k
;
PROBLEM: _diffrn_measured_fraction_theta_full value Low .      0.916 Why?  
RESPONSE: Due to the distruction of the crystal caused by dehydration.
;
_vrf_PLAT026_UAD_+30_uracdih_303k
;
PROBLEM: Ratio Observed / Unique Reflections (too) Low ..        36% Check 
RESPONSE: Due to the distruction of the crystal caused by dehydration.
;
_vrf_PLAT911_UAD_+30_uracdih_303k
;
PROBLEM: Missing FCF Refl Between Thmin & STh/L=    0.600        125 Report
RESPONSE: Due to the distruction of the crystal caused by dehydration.
;
# end Validation Reply Form
