# Supplementary material
Source: MDPI journal article supplement (https://www.mdpi.com/2075-163X/9/6/373)
Supplement: s1 [file s1 › UAD_-10_last.cif]

data_UAD_-10_uracdih_263k
_audit_creation_date               2019-04-29
_audit_creation_method
;
Olex2 1.2
(compiled 2018.05.29 svn.r3508 for OlexSys, GUI svn.r5506)
;
_shelx_SHELXL_version_number       '2018/3'
_audit_contact_author_address      ?
_audit_contact_author_email        ?
_audit_contact_author_name         ''
_audit_contact_author_phone        ?
_publ_contact_author_id_orcid      ?
_publ_section_references
;
Dolomanov, O.V., Bourhis, L.J., Gildea, R.J, Howard, J.A.K. & Puschmann, H.
 (2009), J. Appl. Cryst. 42, 339-341.

Sheldrick, G.M. (2015). Acta Cryst. C71, 3-8.
;
_chemical_name_common              ?
_chemical_name_systematic          ?
_chemical_formula_moiety           'C5 H4 N4 O3, 2(H2 O)'
_chemical_formula_sum              'C5 H8 N4 O5'
_chemical_formula_weight           204.15
_chemical_melting_point            ?

loop_
  _atom_type_symbol
  _atom_type_description
  _atom_type_scat_dispersion_real
  _atom_type_scat_dispersion_imag
  _atom_type_scat_source
 'C' 'C' 0.0181 0.0091 'International Tables Vol C Tables 4.2.6.8 and 6.1.1.4'
 'H' 'H' 0.0000 0.0000 'International Tables Vol C Tables 4.2.6.8 and 6.1.1.4'
 'N' 'N' 0.0311 0.0180 'International Tables Vol C Tables 4.2.6.8 and 6.1.1.4'
 'O' 'O' 0.0492 0.0322 'International Tables Vol C Tables 4.2.6.8 and 6.1.1.4'

_shelx_space_group_comment
;
The symmetry employed for this shelxl refinement is uniquely defined
by the following loop, which should always be used as a source of
symmetry information in preference to the above space-group names.
They are only intended as comments.
;
_space_group_crystal_system        'monoclinic'
_space_group_IT_number             14
_space_group_name_H-M_alt          'P 1 21/c 1'
_space_group_name_Hall             '-P 2ybc'
loop_
  _space_group_symop_operation_xyz
 'x, y, z'
 '-x, y+1/2, -z+1/2'
 '-x, -y, -z'
 'x, -y-1/2, z-1/2'

_cell_length_a                     7.3872(4)
_cell_length_b                     6.3397(3)
_cell_length_c                     17.5312(9)
_cell_angle_alpha                  90
_cell_angle_beta                   90.004(5)
_cell_angle_gamma                  90
_cell_volume                       821.03(7)
_cell_formula_units_Z              4
_cell_measurement_reflns_used      1217
_cell_measurement_temperature      263(2)
_cell_measurement_theta_max        69.5420
_cell_measurement_theta_min        5.0390
_shelx_estimated_absorpt_T_max     ?
_shelx_estimated_absorpt_T_min     ?
_exptl_absorpt_coefficient_mu      1.299
_exptl_absorpt_correction_T_max    1.00000
_exptl_absorpt_correction_T_min    0.42266
_exptl_absorpt_correction_type     multi-scan
_exptl_absorpt_process_details
;
CrysAlisPro 1.171.39.44a (Rigaku Oxford Diffraction, 2018)
Empirical absorption correction using spherical harmonics,
 implemented in SCALE3 ABSPACK scaling algorithm.
;
_exptl_absorpt_special_details     ?
_exptl_crystal_colour              'translucent colorless'
_exptl_crystal_density_diffrn      1.652
_exptl_crystal_density_meas        ?
_exptl_crystal_density_method      ?
_exptl_crystal_description         'prism'
_exptl_crystal_F_000               424
_exptl_crystal_size_max            0.077
_exptl_crystal_size_mid            0.058
_exptl_crystal_size_min            0.022
_exptl_transmission_factor_max     ?
_exptl_transmission_factor_min     ?
_diffrn_reflns_av_R_equivalents    0.0218
_diffrn_reflns_av_unetI/netI       0.0335
_diffrn_reflns_Laue_measured_fraction_full  0.995
_diffrn_reflns_Laue_measured_fraction_max  0.993
_diffrn_reflns_limit_h_max         9
_diffrn_reflns_limit_h_min         -8
_diffrn_reflns_limit_k_max         7
_diffrn_reflns_limit_k_min         -6
_diffrn_reflns_limit_l_max         21
_diffrn_reflns_limit_l_min         -20
_diffrn_reflns_number              4226
_diffrn_reflns_point_group_measured_fraction_full  0.995
_diffrn_reflns_point_group_measured_fraction_max  0.993
_diffrn_reflns_theta_full          67.684
_diffrn_reflns_theta_max           69.923
_diffrn_reflns_theta_min           2.520
_diffrn_ambient_environment        N~2~
_diffrn_ambient_temperature        263(2)
_diffrn_detector                   'CCD plate'
_diffrn_detector_area_resol_mean   ?
_diffrn_detector_type              HyPix3000
_diffrn_measured_fraction_theta_full  0.995
_diffrn_measured_fraction_theta_max  0.993
_diffrn_measurement_details
;
List of Runs (angles in degrees, time in seconds):

  # Type    Start    End  Width  t~exp~   \w     \q     \k     \f   Frames
--------------------------------------------------------------------------
  1  \w    -69.00 -22.00   0.50    3.00    --  -38.82 122.00  29.00   94
  2  \w    -94.00 -60.00   0.50    3.00    --  -38.82 151.00-169.00   68
  3  \w   -100.00 -71.00   0.50    3.00    --  -38.82-151.00 146.00   58
  4  \w     20.00  45.00   0.50    3.00    --   38.82-122.00 -52.00   50
  5  \w     64.00  90.00   0.50    3.00    --   38.82 151.00-169.00   52
  6  \w     37.00  62.00   0.50    3.00    --   38.82-151.00 146.00   50
  7  \w     91.00 124.00   0.50    6.00    --  100.00 151.00-169.00   66
  8  \w     68.00 108.00   0.50    6.00    --  100.00-122.00 -52.00   80
  9  \w    -55.00 -29.00   0.50    3.00    --  -38.82  54.00 -60.00   52
 10  \w    -15.00  11.00   0.50    3.00    --  -38.82 104.00 150.00   52
 11  \w    -73.00 -31.00   0.50    3.00    --  -38.82 104.00 150.00   84
 12  \w     -5.00  26.00   0.50    3.00    --  -38.82  54.00 -60.00   62
 13  \w     78.00 104.00   0.50    3.00    --   38.82  32.00  30.00   52
 14  \w    -24.00   5.00   0.50    3.00    --   38.82 -43.00 -60.00   58
 15  \w     20.00  45.00   0.50    3.00    --   38.82 -32.00  30.00   50
 16  \w     43.00  68.00   0.50    3.00    --   38.82-104.00 -30.00   50
 17  \w     24.00  81.00   0.50    3.00    --   38.82  54.00-120.00  114
 18  \w    -27.00  10.00   0.50    3.00    --   38.82 -32.00  30.00   74
 19  \w    -14.00  32.00   0.50    3.00    --   38.82-104.00 -30.00   92
 20  \w     37.00  74.00   0.50    3.00    --   38.82  32.00  30.00   74
 21  \w     21.00  50.00   0.50    3.00    --   38.82 -43.00 -60.00   58
 22  \w     24.00  51.00   0.50    6.00    --  100.00   0.00-180.00   54
 23  \w     96.00 125.00   0.50    6.00    --  100.00 -69.00-120.00   58
 24  \w    116.00 141.00   0.50    6.00    --  100.00  30.00 -90.00   50
 25  \w     89.00 156.00   0.50    6.00    --  100.00 133.00-180.00  134
 26  \w     34.00  80.00   0.50    6.00    --  100.00 -69.00-120.00   92
 27  \w    109.00 135.00   0.50    6.00    --  100.00 111.00-120.00   52
 28  \w     71.00 132.00   0.50    6.00    --  100.00  15.00-150.00  122
 29  \w     84.00 152.00   0.50    6.00    --  100.00  61.00-120.00  136
 30  \w     93.00 143.00   0.50    6.00    --  100.00  37.00 150.00  100
 31  \w     56.00 103.00   0.50    6.00    --  100.00 -61.00-180.00   94
 32  \w     36.00  90.00   0.50    6.00    --  100.00 -37.00 120.00  108
 33  \w     98.00 123.00   0.50    6.00    --  100.00  45.00-150.00   50
 34  \w     31.00 109.00   0.50    6.00    --  100.00 -86.00 120.00  156
 35  \w     71.00 128.00   0.50    6.00    --  100.00 133.00 -90.00  114
 36  \w     88.00 157.00   0.50    6.00    --  100.00  93.00   0.00  138
 37  \w     81.00 107.00   0.50    6.00    --  100.00 111.00-120.00   52
 38  \w     78.00 103.00   0.50    6.00    --  100.00   0.00-180.00   50
 39  \w     77.00 124.00   0.50    6.00    --  100.00  69.00 -60.00   94
;
_diffrn_measurement_device         'four-circle diffractometer'
_diffrn_measurement_device_type   
 'SuperNova, Single source at offset/far, HyPix3000'
_diffrn_measurement_method         '\w scans'
_diffrn_orient_matrix_type        
 'CrysAlisPro convention (1999,Acta A55,543-557)'
_diffrn_orient_matrix_UB_11        -0.2033689000
_diffrn_orient_matrix_UB_12        -0.0524264000
_diffrn_orient_matrix_UB_13        -0.0041057000
_diffrn_orient_matrix_UB_21        0.0393684000
_diffrn_orient_matrix_UB_22        -0.1725886000
_diffrn_orient_matrix_UB_23        -0.0596021000
_diffrn_orient_matrix_UB_31        0.0234799000
_diffrn_orient_matrix_UB_32        -0.1629363000
_diffrn_orient_matrix_UB_33        0.0644514000
_diffrn_radiation_monochromator    mirror
_diffrn_radiation_probe            x-ray
_diffrn_radiation_type             CuK\a
_diffrn_radiation_wavelength       1.54184
_diffrn_source                     'micro-focus sealed X-ray tube'
_diffrn_source_type                'SuperNova (Cu) X-ray Source'
_reflns_Friedel_coverage           0.000
_reflns_Friedel_fraction_full      .
_reflns_Friedel_fraction_max       .
_reflns_number_gt                  1167
_reflns_number_total               1538
_reflns_odcompleteness_completeness  97.87
_reflns_odcompleteness_iscentric   1
_reflns_odcompleteness_theta       70.93
_reflns_special_details
;
 Reflections were merged by SHELXL according to the crystal
 class for the calculation of statistics and refinement.
 
 _reflns_Friedel_fraction is defined as the number of unique
 Friedel pairs measured divided by the number that would be
 possible theoretically, ignoring centric projections and
 systematic absences. Completness statistics refer to single and
 composite reflections containing twin component 1 only.
;
_reflns_threshold_expression       'I > 2\s(I)'
_computing_cell_refinement         'CrysAlisPro 1.171.39.44a (Rigaku OD, 2018)'
_computing_data_collection         'CrysAlisPro 1.171.39.44a (Rigaku OD, 2018)'
_computing_data_reduction          'CrysAlisPro 1.171.39.44a (Rigaku OD, 2018)'
_computing_molecular_graphics      'Olex2 (Dolomanov et al., 2009)'
_computing_publication_material    'Olex2 (Dolomanov et al., 2009)'
_computing_structure_refinement    'ShelXL (Sheldrick, 2015)'
_computing_structure_solution      'ShelXT (Sheldrick, 2015)'
_refine_diff_density_max           0.270
_refine_diff_density_min           -0.167
_refine_diff_density_rms           0.050
_refine_ls_extinction_coef         0.0015(2)
_refine_ls_extinction_expression  
 'Fc^*^=kFc[1+0.001xFc^2^\l^3^/sin(2\q)]^-1/4^'
_refine_ls_extinction_method       'SHELXL-2018/3 (Sheldrick 2018)'
_refine_ls_goodness_of_fit_ref     1.051
_refine_ls_hydrogen_treatment      mixed
_refine_ls_matrix_type             full
_refine_ls_number_parameters       165
_refine_ls_number_reflns           1538
_refine_ls_number_restraints       5
_refine_ls_R_factor_all            0.0650
_refine_ls_R_factor_gt             0.0476
_refine_ls_restrained_S_all        1.050
_refine_ls_shift/su_max            0.000
_refine_ls_shift/su_mean           0.000
_refine_ls_structure_factor_coef   Fsqd
_refine_ls_weighting_details      
 'w=1/[\s^2^(Fo^2^)+(0.0726P)^2^+0.1003P] where P=(Fo^2^+2Fc^2^)/3'
_refine_ls_weighting_scheme        calc
_refine_ls_wR_factor_gt            0.1233
_refine_ls_wR_factor_ref           0.1366
_refine_special_details
;
 Refined as a 2-component twin.
;
_olex2_refinement_description
;
1. Twinned data refinement
 Scales: 0.569(6)
 0.431(6)
2. Fixed Uiso
 At 1.2 times of:
  All N(H) groups
 At 1.5 times of:
  All O(H,H) groups
3. Restrained distances
 OW2-HW2B = OW2-HW2A
 0.95 with sigma of 0.02
 HW2B-O3A_$1
 1.8 with sigma of 0.02
 OW1-HW1B = OW1-HW1A
 0.95 with sigma of 0.02
4. Uiso/Uaniso restraints and constraints
Uanis(C1A) = Uanis(C1B)
Uanis(C2A) = Uanis(C2B) = Uanis(C3A) = Uanis(C3B)
Uanis(C4A) = Uanis(C4B)
Uanis(C5A) = Uanis(C5B)
Uanis(N1A) = Uanis(N1B) = Uanis(N3A) = Uanis(N3B)
Uanis(N2A) = Uanis(N2B)
Uanis(N4A) = Uanis(N4B)
Uanis(O1A) = Uanis(O1B)
Uanis(O2A) = Uanis(O2B)
Uanis(O3A) = Uanis(O3B)
5. Others
 Fixed Sof: C1A(0.58523) C2A(0.58523) C3A(0.58523) C4A(0.58523) C5A(0.58523)
 N1A(0.58523) H1A(0.58523) N2A(0.58523) H2A(0.58523) N3A(0.58523) H3A(0.58523)
 N4A(0.58523) H4A(0.58523) O1A(0.58523) O2A(0.58523) O3A(0.58523) C1B(0.41477)
 C2B(0.41477) C3B(0.41477) C4B(0.41477) C5B(0.41477) N1B(0.41477) H1B(0.41477)
 N2B(0.41477) H2B(0.41477) N3B(0.41477) H3B(0.41477) N4B(0.41477) H4B(0.41477)
 O1B(0.41477) O2B(0.41477) O3B(0.41477)
6.a Aromatic/amide H refined with riding coordinates:
 N1A(H1A), N2A(H2A), N3A(H3A), N4A(H4A), N1B(H1B), N2B(H2B), N3B(H3B), N4B(H4B)
;
_atom_sites_solution_hydrogens     mixed
_atom_sites_solution_primary       ?
_atom_sites_solution_secondary     ?
loop_
  _atom_site_label
  _atom_site_type_symbol
  _atom_site_fract_x
  _atom_site_fract_y
  _atom_site_fract_z
  _atom_site_U_iso_or_equiv
  _atom_site_adp_type
  _atom_site_occupancy
  _atom_site_site_symmetry_order
  _atom_site_calc_flag
  _atom_site_refinement_flags_posn
  _atom_site_refinement_flags_adp
  _atom_site_refinement_flags_occupancy
  _atom_site_disorder_assembly
  _atom_site_disorder_group
 C1A C -0.1137(12) -0.2097(18) -0.4266(7) 0.0408(12) Uani 0.5852 1 d . . P A 1
 C2A C -0.2631(9) -0.5277(8) -0.4024(7) 0.0371(5) Uani 0.5852 1 d . . P A 1
 C3A C -0.2841(9) -0.5704(8) -0.4766(3) 0.0371(5) Uani 0.5852 1 d . . P A 1
 C4A C -0.2217(9) -0.4287(9) -0.5343(3) 0.0375(6) Uani 0.5852 1 d . . P A 1
 C5A C -0.4060(14) -0.8383(15) -0.4101(7) 0.0398(14) Uani 0.5852 1 d . . P A 1
 N1A N -0.1436(12) -0.2500(13) -0.5019(3) 0.0378(11) Uani 0.5852 1 d . . P A 1
 H1A H -0.110228 -0.153269 -0.533274 0.045 Uiso 0.5852 1 calc R . P A 1
 N2A N -0.1792(13) -0.3487(15) -0.3764(5) 0.0438(12) Uani 0.5852 1 d . . P A 1
 H2A H -0.168880 -0.326083 -0.328244 0.053 Uiso 0.5852 1 calc R . P A 1
 N3A N -0.3707(13) -0.7622(14) -0.4816(5) 0.0378(11) Uani 0.5852 1 d . . P A 1
 H3A H -0.398450 -0.824967 -0.523532 0.045 Uiso 0.5852 1 calc R . P A 1
 N4A N -0.3340(13) -0.6864(12) -0.3593(4) 0.0400(11) Uani 0.5852 1 d . . P A 1
 H4A H -0.334908 -0.692975 -0.310335 0.048 Uiso 0.5852 1 calc R . P A 1
 O1A O -0.0343(12) -0.0518(13) -0.4024(5) 0.0511(15) Uani 0.5852 1 d . . P A 1
 O2A O -0.2311(8) -0.4492(6) -0.6025(4) 0.0500(8) Uani 0.5852 1 d . . P A 1
 O3A O -0.4891(12) -0.9982(13) -0.3923(5) 0.0559(14) Uani 0.5852 1 d D . P A 1
 C1B C -0.392(2) -0.788(2) -0.4265(10) 0.0408(12) Uani 0.4148 1 d . . P B 2
 C2B C -0.2379(14) -0.4735(13) -0.4004(11) 0.0371(5) Uani 0.4148 1 d . . P B 2
 C3B C -0.2161(12) -0.4295(12) -0.4776(5) 0.0371(5) Uani 0.4148 1 d . . P B 2
 C4B C -0.2802(12) -0.5630(13) -0.5319(5) 0.0375(6) Uani 0.4148 1 d . . P B 2
 C5B C -0.0857(19) -0.171(3) -0.4113(11) 0.0398(14) Uani 0.4148 1 d . . P B 2
 N1B N -0.370(2) -0.742(2) -0.5022(6) 0.0378(11) Uani 0.4148 1 d . . P B 2
 H1B H -0.414702 -0.830160 -0.534473 0.045 Uiso 0.4148 1 calc R . P B 2
 N2B N -0.325(2) -0.6476(19) -0.3765(7) 0.0438(12) Uani 0.4148 1 d . . P B 2
 H2B H -0.337983 -0.669565 -0.328453 0.053 Uiso 0.4148 1 calc R . P B 2
 N3B N -0.1187(17) -0.2403(18) -0.4803(6) 0.0378(11) Uani 0.4148 1 d . . P B 2
 H3B H -0.085104 -0.178212 -0.521576 0.045 Uiso 0.4148 1 calc R . P B 2
 N4B N -0.160(2) -0.326(2) -0.3590(7) 0.0400(11) Uani 0.4148 1 d . . P B 2
 H4B H -0.154919 -0.322428 -0.310044 0.048 Uiso 0.4148 1 calc R . P B 2
 O1B O -0.4731(17) -0.956(2) -0.4064(7) 0.0511(15) Uani 0.4148 1 d . . P B 2
 O2B O -0.2670(12) -0.5414(10) -0.6041(6) 0.0500(8) Uani 0.4148 1 d . . P B 2
 O3B O -0.004(2) -0.004(2) -0.3968(8) 0.0559(14) Uani 0.4148 1 d . . P B 2
 OW1 O 0.0932(6) 0.2264(6) -0.27950(19) 0.0977(13) Uani 1 1 d D . . . .
 HW1A H 0.036(8) 0.131(7) -0.314(3) 0.147 Uiso 1 1 d DR . . . .
 HW1B H 0.195(5) 0.285(8) -0.303(3) 0.147 Uiso 1 1 d DR . . . .
 OW2 O -0.3990(8) -0.7434(6) -0.21720(19) 0.1062(15) Uani 1 1 d D . . . .
 HW2A H -0.350(9) -0.815(9) -0.174(3) 0.159 Uiso 1 1 d DR . . . .
 HW2B H -0.408(8) -0.609(5) -0.193(2) 0.159 Uiso 1 1 d DR . . . .

loop_
  _atom_site_aniso_label
  _atom_site_aniso_U_11
  _atom_site_aniso_U_22
  _atom_site_aniso_U_33
  _atom_site_aniso_U_23
  _atom_site_aniso_U_13
  _atom_site_aniso_U_12
 C1A 0.050(2) 0.031(4) 0.042(5) -0.006(2) -0.006(3) -0.002(2)
 C2A 0.0415(12) 0.0313(13) 0.0386(10) 0.004(2) 0.001(2) -0.0017(10)
 C3A 0.0415(12) 0.0313(13) 0.0386(10) 0.004(2) 0.001(2) -0.0017(10)
 C4A 0.0423(15) 0.0326(15) 0.0377(13) 0.002(3) 0.002(3) 0.0004(12)
 C5A 0.045(3) 0.037(5) 0.037(4) 0.000(3) -0.006(4) -0.002(3)
 N1A 0.0486(13) 0.0335(9) 0.031(4) 0.0027(19) -0.009(2) -0.0053(8)
 N2A 0.058(2) 0.048(3) 0.025(3) 0.000(3) -0.001(3) 0.002(2)
 N3A 0.0486(13) 0.0335(9) 0.031(4) 0.0027(19) -0.009(2) -0.0053(8)
 N4A 0.055(2) 0.039(2) 0.026(3) 0.009(2) -0.008(3) -0.0051(15)
 O1A 0.065(2) 0.040(4) 0.049(2) 0.009(3) 0.002(3) -0.023(2)
 O2A 0.0690(19) 0.048(2) 0.0334(9) 0.003(3) -0.001(2) -0.0110(19)
 O3A 0.073(3) 0.043(3) 0.052(2) 0.013(2) 0.005(3) -0.020(2)
 C1B 0.050(2) 0.031(4) 0.042(5) -0.006(2) -0.006(3) -0.002(2)
 C2B 0.0415(12) 0.0313(13) 0.0386(10) 0.004(2) 0.001(2) -0.0017(10)
 C3B 0.0415(12) 0.0313(13) 0.0386(10) 0.004(2) 0.001(2) -0.0017(10)
 C4B 0.0423(15) 0.0326(15) 0.0377(13) 0.002(3) 0.002(3) 0.0004(12)
 C5B 0.045(3) 0.037(5) 0.037(4) 0.000(3) -0.006(4) -0.002(3)
 N1B 0.0486(13) 0.0335(9) 0.031(4) 0.0027(19) -0.009(2) -0.0053(8)
 N2B 0.058(2) 0.048(3) 0.025(3) 0.000(3) -0.001(3) 0.002(2)
 N3B 0.0486(13) 0.0335(9) 0.031(4) 0.0027(19) -0.009(2) -0.0053(8)
 N4B 0.055(2) 0.039(2) 0.026(3) 0.009(2) -0.008(3) -0.0051(15)
 O1B 0.065(2) 0.040(4) 0.049(2) 0.009(3) 0.002(3) -0.023(2)
 O2B 0.0690(19) 0.048(2) 0.0334(9) 0.003(3) -0.001(2) -0.0110(19)
 O3B 0.073(3) 0.043(3) 0.052(2) 0.013(2) 0.005(3) -0.020(2)
 OW1 0.116(3) 0.112(3) 0.0647(18) -0.0017(18) -0.008(2) -0.020(2)
 OW2 0.148(4) 0.112(3) 0.0580(16) -0.0115(17) 0.012(3) 0.022(3)

_geom_special_details
;
 All esds (except the esd in the dihedral angle between two l.s. planes)
 are estimated using the full covariance matrix.  The cell esds are taken
 into account individually in the estimation of esds in distances, angles
 and torsion angles; correlations between esds in cell parameters are only
 used when they are defined by crystal symmetry.  An approximate (isotropic)
 treatment of cell esds is used for estimating esds involving l.s. planes.
;
loop_
  _geom_bond_atom_site_label_1
  _geom_bond_atom_site_label_2
  _geom_bond_distance
  _geom_bond_site_symmetry_2
  _geom_bond_publ_flag
 C1A N1A 1.363(10) . ?
 C1A N2A 1.336(19) . ?
 C1A O1A 1.236(10) . ?
 C2A C3A 1.338(15) . ?
 C2A N2A 1.371(10) . ?
 C2A N4A 1.363(11) . ?
 C3A C4A 1.428(8) . ?
 C3A N3A 1.377(11) . ?
 C4A N1A 1.392(9) . ?
 C4A O2A 1.206(10) . ?
 C5A N3A 1.369(10) . ?
 C5A N4A 1.415(17) . ?
 C5A O3A 1.225(12) . ?
 C1B N1B 1.366(15) . ?
 C1B N2B 1.34(3) . ?
 C1B O1B 1.274(16) . ?
 C2B C3B 1.39(2) . ?
 C2B N2B 1.344(15) . ?
 C2B N4B 1.313(16) . ?
 C3B C4B 1.359(11) . ?
 C3B N3B 1.399(14) . ?
 C4B N1B 1.416(14) . ?
 C4B O2B 1.278(14) . ?
 C5B N3B 1.310(15) . ?
 C5B N4B 1.45(3) . ?
 C5B O3B 1.242(16) . ?

loop_
  _geom_angle_atom_site_label_1
  _geom_angle_atom_site_label_2
  _geom_angle_atom_site_label_3
  _geom_angle
  _geom_angle_site_symmetry_1
  _geom_angle_site_symmetry_3
  _geom_angle_publ_flag
 N2A C1A N1A 117.1(8) . . ?
 O1A C1A N1A 124.1(12) . . ?
 O1A C1A N2A 118.7(8) . . ?
 C3A C2A N2A 122.9(9) . . ?
 C3A C2A N4A 110.2(7) . . ?
 N4A C2A N2A 126.9(10) . . ?
 C2A C3A C4A 121.5(6) . . ?
 C2A C3A N3A 107.1(6) . . ?
 N3A C3A C4A 131.3(6) . . ?
 N1A C4A C3A 111.0(5) . . ?
 O2A C4A C3A 128.0(6) . . ?
 O2A C4A N1A 121.1(6) . . ?
 N3A C5A N4A 105.3(8) . . ?
 O3A C5A N3A 128.4(12) . . ?
 O3A C5A N4A 126.2(9) . . ?
 C1A N1A C4A 127.9(8) . . ?
 C1A N2A C2A 119.4(8) . . ?
 C5A N3A C3A 110.0(8) . . ?
 C2A N4A C5A 107.4(7) . . ?
 N2B C1B N1B 116.8(13) . . ?
 O1B C1B N1B 120.0(17) . . ?
 O1B C1B N2B 123.1(14) . . ?
 N2B C2B C3B 121.5(13) . . ?
 N4B C2B C3B 110.1(10) . . ?
 N4B C2B N2B 128.4(15) . . ?
 C2B C3B N3B 105.4(8) . . ?
 C4B C3B C2B 121.1(8) . . ?
 C4B C3B N3B 133.6(9) . . ?
 C3B C4B N1B 114.0(8) . . ?
 O2B C4B C3B 127.0(9) . . ?
 O2B C4B N1B 119.1(9) . . ?
 N3B C5B N4B 106.5(13) . . ?
 O3B C5B N3B 124(2) . . ?
 O3B C5B N4B 129.1(15) . . ?
 C1B N1B C4B 125.5(14) . . ?
 C1B N2B C2B 121.1(12) . . ?
 C5B N3B C3B 110.6(13) . . ?
 C2B N4B C5B 107.4(11) . . ?


loop_
  _geom_hbond_atom_site_label_D
  _geom_hbond_atom_site_label_H
  _geom_hbond_atom_site_label_A
  _geom_hbond_distance_DH
  _geom_hbond_distance_HA
  _geom_hbond_distance_DA
  _geom_hbond_angle_DHA
  _geom_hbond_site_symmetry_A
  _geom_hbond_publ_flag
 N1A H1A O1A 0.86 2.03 2.864(13) 164.8 3_554 yes
 N2A H2A OW1 0.86 2.00 2.846(8) 168.8 2_544 yes
 N3A H3A O3A 0.86 2.03 2.876(15) 166.8 3_434 yes
 N4A H4A OW2 0.86 1.73 2.563(8) 162.5 . yes
 N1B H1B O1B 0.86 1.90 2.75(2) 171.9 3_434 yes
 N2B H2B OW2 0.86 2.06 2.911(10) 172.6 . yes
 N3B H3B O3B 0.86 1.95 2.81(2) 169.7 3_554 yes
 N4B H4B OW1 0.86 1.66 2.501(11) 163.8 2_544 yes
 OW1 HW1A O1A 0.95(2) 2.01(3) 2.939(7) 166(6) . yes
 OW1 HW1A O3B 0.95(2) 1.72(3) 2.624(11) 159(6) . yes
 OW1 HW1B O2A 0.93(2) 1.97(5) 2.704(7) 134(5) 3_554 yes
 OW1 HW1B O2B 0.93(2) 2.36(4) 3.130(9) 139(5) 3_554 yes
 OW2 HW2A O2A 0.95(2) 2.14(3) 3.063(7) 162(6) 4_546 yes
 OW2 HW2A O2B 0.95(2) 1.65(2) 2.596(10) 175(6) 4_546 yes
 OW2 HW2B O3A 0.950(19) 1.826(19) 2.605(7) 137(3) 2_454 yes
 OW2 HW2B O1B 0.950(19) 2.19(2) 2.986(11) 141(3) 2_454 yes

loop_
  _geom_torsion_atom_site_label_1
  _geom_torsion_atom_site_label_2
  _geom_torsion_atom_site_label_3
  _geom_torsion_atom_site_label_4
  _geom_torsion
  _geom_torsion_site_symmetry_1
  _geom_torsion_site_symmetry_2
  _geom_torsion_site_symmetry_3
  _geom_torsion_site_symmetry_4
  _geom_torsion_publ_flag
 C2A C3A C4A N1A -0.9(10) . . . . ?
 C2A C3A C4A O2A 179.4(7) . . . . ?
 C2A C3A N3A C5A 0.8(10) . . . . ?
 C3A C2A N2A C1A -0.5(12) . . . . ?
 C3A C2A N4A C5A -0.5(9) . . . . ?
 C3A C4A N1A C1A 4.5(13) . . . . ?
 C4A C3A N3A C5A -179.2(7) . . . . ?
 N1A C1A N2A C2A 3.5(13) . . . . ?
 N2A C1A N1A C4A -5.9(15) . . . . ?
 N2A C2A C3A C4A -0.8(10) . . . . ?
 N2A C2A C3A N3A 179.2(8) . . . . ?
 N2A C2A N4A C5A -179.8(8) . . . . ?
 N3A C3A C4A N1A 179.1(6) . . . . ?
 N3A C3A C4A O2A -0.6(13) . . . . ?
 N3A C5A N4A C2A 1.0(10) . . . . ?
 N4A C2A C3A C4A 179.8(6) . . . . ?
 N4A C2A C3A N3A -0.2(9) . . . . ?
 N4A C2A N2A C1A 178.7(9) . . . . ?
 N4A C5A N3A C3A -1.1(11) . . . . ?
 O1A C1A N1A C4A 175.9(9) . . . . ?
 O1A C1A N2A C2A -178.2(9) . . . . ?
 O2A C4A N1A C1A -175.8(8) . . . . ?
 O3A C5A N3A C3A 175.9(8) . . . . ?
 O3A C5A N4A C2A -176.1(8) . . . . ?
 C2B C3B C4B N1B 0.9(14) . . . . ?
 C2B C3B C4B O2B -179.2(10) . . . . ?
 C2B C3B N3B C5B -1.1(14) . . . . ?
 C3B C2B N2B C1B 1.1(18) . . . . ?
 C3B C2B N4B C5B 1.4(14) . . . . ?
 C3B C4B N1B C1B -1(2) . . . . ?
 C4B C3B N3B C5B -179.1(11) . . . . ?
 N1B C1B N2B C2B -1(2) . . . . ?
 N2B C1B N1B C4B 1(2) . . . . ?
 N2B C2B C3B C4B -0.9(16) . . . . ?
 N2B C2B C3B N3B -179.3(12) . . . . ?
 N2B C2B N4B C5B -179.7(13) . . . . ?
 N3B C3B C4B N1B 178.7(8) . . . . ?
 N3B C3B C4B O2B -1.4(18) . . . . ?
 N3B C5B N4B C2B -2.1(16) . . . . ?
 N4B C2B C3B C4B 178.0(9) . . . . ?
 N4B C2B C3B N3B -0.3(13) . . . . ?
 N4B C2B N2B C1B -177.6(14) . . . . ?
 N4B C5B N3B C3B 1.9(16) . . . . ?
 O1B C1B N1B C4B -179.1(12) . . . . ?
 O1B C1B N2B C2B 179.2(13) . . . . ?
 O2B C4B N1B C1B 178.9(13) . . . . ?
 O3B C5B N3B C3B -178.9(12) . . . . ?
 O3B C5B N4B C2B 178.7(14) . . . . ?


_shelx_res_file
;
TITL UrAcDih_263K in P2(1)/c
    uracdih_263k.res
    created by SHELXL-2018/3 at 23:50:38 on 29-Apr-2019
REM transformed to space group :
REM P2(1)/c (#14 in standard setting)
CELL 1.54184 7.3872 6.3397 17.5312 90 90.004 90
ZERR 4 0.0004 0.0003 0.0009 0 0.005 0
LATT 1
SYMM -X,0.5+Y,0.5-Z
SFAC C H N O
UNIT 20 32 16 20
EQIV $1 -1-X,0.5+Y,-0.5-Z
DFIX 0.95 OW2 HW2b OW2 HW2a
DFIX 1.8 HW2b O3A_$1
DFIX 0.95 OW1 HW1b OW1 HW1a
EADP C1A C1B
EADP C2A C2B C3A C3B
EADP C4A C4B
EADP C5A C5B
EADP N1A N1B N3A N3B
EADP N2A N2B
EADP N4A N4B
EADP O1A O1B
EADP O2A O2B
EADP O3A O3B

L.S. 20
PLAN  20
BOND
list 4
fmap 2 53
acta
TWIN -1 0 0 0 -1 0 0 0 1 2
OMIT -4 140
OMIT 0 -2 5
OMIT 6 -1 14
OMIT -1 -1 0
OMIT 6 -1 13
REM <olex2.extras>
REM <HklSrc "%.\\UrAcDih_263K.hkl">
REM </olex2.extras>

WGHT    0.072600    0.100300
EXTI    0.001464
BASF   0.43138
FVAR       2.86956
PART 1
C1A   1   -0.113676   -0.209749   -0.426574    10.58523    0.04974    0.03098 =
         0.04177   -0.00613   -0.00604   -0.00227
C2A   1   -0.263067   -0.527699   -0.402407    10.58523    0.04146    0.03131 =
         0.03862    0.00428    0.00103   -0.00166
C3A   1   -0.284138   -0.570398   -0.476636    10.58523    0.04146    0.03131 =
         0.03862    0.00428    0.00103   -0.00166
C4A   1   -0.221716   -0.428661   -0.534251    10.58523    0.04226    0.03263 =
         0.03770    0.00213    0.00211    0.00043
C5A   1   -0.406032   -0.838289   -0.410078    10.58523    0.04534    0.03721 =
         0.03677    0.00029   -0.00615   -0.00197
N1A   3   -0.143645   -0.250039   -0.501914    10.58523    0.04857    0.03353 =
         0.03137    0.00268   -0.00916   -0.00533
AFIX  43
H1A   2   -0.110228   -0.153269   -0.533274    10.58523   -1.20000
AFIX   0
N2A   3   -0.179204   -0.348700   -0.376417    10.58523    0.05767    0.04849 =
         0.02536    0.00022   -0.00056    0.00217
AFIX  43
H2A   2   -0.168880   -0.326083   -0.328244    10.58523   -1.20000
AFIX   0
N3A   3   -0.370685   -0.762203   -0.481645    10.58523    0.04857    0.03353 =
         0.03137    0.00268   -0.00916   -0.00533
AFIX  43
H3A   2   -0.398450   -0.824967   -0.523532    10.58523   -1.20000
AFIX   0
N4A   3   -0.334041   -0.686387   -0.359331    10.58523    0.05496    0.03874 =
         0.02636    0.00876   -0.00755   -0.00507
AFIX  43
H4A   2   -0.334908   -0.692975   -0.310335    10.58523   -1.20000
AFIX   0
O1A   4   -0.034336   -0.051753   -0.402389    10.58523    0.06465    0.03982 =
         0.04888    0.00921    0.00164   -0.02293
O2A   4   -0.231053   -0.449170   -0.602501    10.58523    0.06897    0.04770 =
         0.03340    0.00270   -0.00075   -0.01101
O3A   4   -0.489066   -0.998158   -0.392254    10.58523    0.07254    0.04302 =
         0.05225    0.01255    0.00502   -0.01967
PART 0
PART 2
C1B   1   -0.391695   -0.787682   -0.426531    10.41477    0.04974    0.03098 =
         0.04177   -0.00613   -0.00604   -0.00227
C2B   1   -0.237872   -0.473529   -0.400364    10.41477    0.04146    0.03131 =
         0.03862    0.00428    0.00103   -0.00166
C3B   1   -0.216069   -0.429462   -0.477581    10.41477    0.04146    0.03131 =
         0.03862    0.00428    0.00103   -0.00166
C4B   1   -0.280167   -0.562966   -0.531867    10.41477    0.04226    0.03263 =
         0.03770    0.00213    0.00211    0.00043
C5B   1   -0.085717   -0.170823   -0.411306    10.41477    0.04534    0.03721 =
         0.03677    0.00029   -0.00615   -0.00197
N1B   3   -0.370010   -0.742339   -0.502173    10.41477    0.04857    0.03353 =
         0.03137    0.00268   -0.00916   -0.00533
AFIX  43
H1B   2   -0.414702   -0.830160   -0.534473    10.41477   -1.20000
AFIX   0
N2B   3   -0.324887   -0.647584   -0.376544    10.41477    0.05767    0.04849 =
         0.02536    0.00022   -0.00056    0.00217
AFIX  43
H2B   2   -0.337983   -0.669565   -0.328453    10.41477   -1.20000
AFIX   0
N3B   3   -0.118675   -0.240283   -0.480316    10.41477    0.04857    0.03353 =
         0.03137    0.00268   -0.00916   -0.00533
AFIX  43
H3B   2   -0.085104   -0.178212   -0.521576    10.41477   -1.20000
AFIX   0
N4B   3   -0.160443   -0.326273   -0.359025    10.41477    0.05496    0.03874 =
         0.02636    0.00876   -0.00755   -0.00507
AFIX  43
H4B   2   -0.154919   -0.322428   -0.310044    10.41477   -1.20000
AFIX   0
O1B   4   -0.473138   -0.955766   -0.406406    10.41477    0.06465    0.03982 =
         0.04888    0.00921    0.00164   -0.02293
O2B   4   -0.266987   -0.541443   -0.604132    10.41477    0.06897    0.04770 =
         0.03340    0.00270   -0.00075   -0.01101
O3B   4   -0.003921   -0.004367   -0.396784    10.41477    0.07254    0.04302 =
         0.05225    0.01255    0.00502   -0.01967
PART 0
OW1   4    0.093192    0.226432   -0.279498    11.00000    0.11636    0.11220 =
         0.06468   -0.00165   -0.00754   -0.02036
HW1A  2    0.036289    0.131211   -0.313743    11.00000   -1.50000
HW1B  2    0.194958    0.284826   -0.303047    11.00000   -1.50000
OW2   4   -0.399039   -0.743432   -0.217199    11.00000    0.14844    0.11199 =
         0.05803   -0.01150    0.01163    0.02240
HW2A  2   -0.350327   -0.814871   -0.174151    11.00000   -1.50000
HW2B  2   -0.407679   -0.609072   -0.193485    11.00000   -1.50000
HKLF 4


REM  UrAcDih_263K in P2(1)/c
REM wR2 = 0.1366, GooF = S = 1.051, Restrained GooF = 1.050 for all data
REM R1 = 0.0476 for 1167 Fo > 4sig(Fo) and 0.0650 for all 1538 data
REM 165 parameters refined using 5 restraints

END

WGHT      0.0729      0.0975

REM Highest difference peak  0.270,  deepest hole -0.167,  1-sigma level  0.050
Q1    1  -0.3021 -0.6410 -0.2234  11.00000  0.05    0.27
Q2    1   0.2036  0.1546 -0.2830  11.00000  0.05    0.27
Q3    1  -0.4139 -0.7627 -0.2325  11.00000  0.05    0.18
Q4    1  -0.4771 -0.9320 -0.5346  11.00000  0.05    0.18
Q5    1   0.0988  0.3711 -0.2269  11.00000  0.05    0.16
Q6    1  -0.4140 -0.8055 -0.6047  11.00000  0.05    0.16
Q7    1  -0.0390 -0.0860 -0.5378  11.00000  0.05    0.16
Q8    1  -0.3374 -0.6652 -0.6075  11.00000  0.05    0.15
Q9    1  -0.1222 -0.2751 -0.5841  11.00000  0.05    0.15
Q10   1  -0.1964 -0.2649 -0.2618  11.00000  0.05    0.15
Q11   1  -0.0579 -0.1153 -0.5630  11.00000  0.05    0.14
Q12   1  -0.0774 -0.2760 -0.2807  11.00000  0.05    0.14
Q13   1  -0.3195 -0.6327 -0.4851  11.00000  0.05    0.14
Q14   1  -0.4419 -0.7374 -0.2864  11.00000  0.05    0.14
Q15   1  -0.2628 -0.4905 -0.6045  11.00000  0.05    0.13
Q16   1   0.0983  0.2548 -0.2378  11.00000  0.05    0.13
Q17   1  -0.0734 -0.1732 -0.5997  11.00000  0.05    0.13
Q18   1  -0.2169 -0.4581 -0.6591  11.00000  0.05    0.13
Q19   1   0.0037 -0.0293 -0.4557  11.00000  0.05    0.13
Q20   1  -0.1566 -0.3512 -0.6150  11.00000  0.05    0.12
;
_shelx_res_checksum                4850
_shelx_hkl_file
;
   0   0   1 3.16104 2.17172   3
   0   0  -1 4.29533 1.84603  17
   0   0   1 4.23209 2.52515  12
   0   0   1 1.93737 2.27450  19
   0   0   2 46910.2 1590.21   3
   0   0  -2 46856.8 1588.86  18
   0   0   2 47053.9 1589.44  11
   0   0  -2 47029.4 1589.51  17
   0   0   2 47197.8 1590.50  19
   0   0   2 47032.5 1590.03  12
   0   0   3 6.59457 7.40768  19
   0   0   3 11.4228 7.15979   3
   0   0  -3 5.63875 6.49143  17
   0   0  -3 10.7133 4.49157  18
   0   0   3 9.42336 7.96693  12
   0   0   3 9.55153 5.24323  11
   0   0   4 6218.03 219.369  19
   0   0   4 6450.43 218.704   3
   0   0   4 6187.92 217.197  11
   0   0  -4 6485.71 217.320  17
   0   0   4 6180.59 218.171  12
   0   0   5 12.6549 11.3887  19
   0   0  -5 22.3327 11.0539  17
   0   0   5 13.9038 11.9324   3
   0   0  -6 13185.0 453.707  17
   0   0   6 13342.6 456.359   4
   0   0   6 13070.6 457.230  19
   0   0   6 13325.4 455.834   3
   0   0   7 5.93562 11.6211   3
   0   0   7-1.27760 12.9119   4
   0   0   7 5.59525 12.8907  19
   0   0   8 29051.8 987.146   4
   0   0   8 28596.9 988.182  19
   0   0   8 28720.2 986.217   3
   0   0   9 4.03451 16.5286  19
   0   0   9 1.84432 14.3160   4
   0   0   9 6.74563 13.9356   3
   0   0  10 35718.2 1254.45   4
   0   0  10 37306.8 1252.72   3
   0   0  11 11.4823 17.9950   3
   0   0  11 2.55717 17.5417   4
   0   0  12 41.2850 22.1181   4
   0   0  12 77.6758 16.9810  31
   0   0  12 71.0454 14.6430  36
   0   0  13-16.8159 20.8524   2
   0   0  13-1.34514 15.9486  31
   0   0  13 4.09156 13.6665  36
   0   0  13 6.70746 20.0029   4
   0   0  14 51.1943 17.8288  31
   0   0  14 73.8868 22.3788   9
   0   0  14 66.9934 18.5885  26
   0   0  15 12.4146 17.5169  31
   0   0  15 6.97988 17.3378  26
   0   0  16 3816.36 144.739  31
   0   0  16 3910.23 147.712  26
   0   0  17 21.8011 17.8163  31
   0   0  17 5.33032 16.8156  26
   0   0  18-6.65457 16.0410  26
   0   0  18-7.21936 16.5523  31
   0   0  19 14.6512 16.0837  26
   0   0  19-1.25895 15.0795  31
   0   0  20 22.5869 12.9248  31
   0   0  20-1.20700 12.8700  26
   0   0  21 17.1391 10.9965  26
   0   0  21-6.89789 10.4177  31
   0   0  21-17.7635 16.5605   8
   0   1   0 3.94881 6.88592  18
   0   1   0 8.83624 7.71778  11
   0  -1   0 2.26639 5.62418  13
   0   1   0 11.5158 10.0690   5
   0   1   1 6629.86 228.654  16
   0   1   1 6569.00 224.547  11
   0   1   1 6566.12 224.700   6
   0   1   1 6198.01 225.655   1
   0   1   1 6418.90 221.932  18
   0   1  -1 6717.95 223.382  18
   0  -1   1 6366.07 220.745  12
   0   1   2 22.0371 5.96108  18
   0  -1   2 33.0369 7.94283  12
   0   1  -2 27.0690 10.1113  18
   0   1   2 22.4593 11.1316   2
   0   1   2 19.5599 10.7826   1
   0   1   2 21.9474 9.96418  11
   0   1   2 32.4963 10.0574  21
   0   1   2 17.0667 5.59654   9
   0  -1  -2 37.3281 7.38011  20
   0   1   2 20.6323 15.5427  16
   0   1   3 1327.87 48.7156  15
   0  -1   3 1380.51 51.8128  12
   0   1   3 1492.91 58.9532  16
   0   1   3 1466.78 54.8060   1
   0   1   3 1436.68 54.8169  11
   0   1   3 1341.87 54.2927   2
   0   1   3 1380.80 51.9652  21
   0   1  -3 1431.96 53.2471  18
   0   1  -3 1360.63 53.3828  17
   0   1  -4 44.0879 12.4823  18
   0   1  -4 46.6111 14.6338  17
   0   1   4 37.1527 12.9310  11
   0   1   4 40.6932 13.2990   2
   0  -1   4 49.0461 12.9812  12
   0   1   5 2360.92 88.3658  11
   0   1   5 2341.58 88.4829   2
   0   1  -5 2254.61 87.0916  17
   0   1  -5 2235.34 86.1463  18
   0  -1   5 2395.65 86.2872  12
   0   1  -6 15.2889 15.0496  17
   0  -1   6 23.3807 12.1323  19
   0   1   6 24.0376 14.3982   2
   0   1   6 30.9745 13.2315  11
   0  -1   6 26.6325 14.2200  12
   0   1  -7 8823.55 310.189  17
   0   1   7 9029.69 311.806   2
   0  -1   7 8655.22 310.000  19
   0  -1   8 134.272 19.1959   3
   0  -1   8 141.758 19.1087  19
   0   1  -8 127.731 21.1519  17
   0   1   8 122.384 19.3419   2
   0  -1   9 17.4003 15.3722   3
   0   1   9-4.08764 15.5601   2
   0   1  10 125.940 23.6541   2
   0  -1  10 107.037 21.4993   3
   0  -1  11 1572.94 73.6437   4
   0   1  11 1485.95 75.0010   2
   0  -1  11 1623.86 73.3109   3
   0  -1  12 2.69770 17.8260   3
   0   1  12 33.0893 14.6958  31
   0  -1  12 6.24850 15.7396  31
   0   1  12 41.0429 21.7968   2
   0  -1  12 14.5149 18.1444   4
   0   1  12 20.3432 14.8299  26
   0  -1  13 1053.52 61.9470   4
   0  -1  13 1060.45 60.4902   3
   0  -1  13 1177.19 51.6239  31
   0   1  13 1167.57 52.2994  26
   0   1  13 1133.62 50.3682  31
   0  -1  14 96.7265 20.8672  31
   0   1  14 64.4291 20.2724  26
   0  -1  14 63.1721 25.3449   4
   0   1  14 103.326 18.9201  31
   0   1  14 103.314 29.4820   2
   0   1  15 47.2421 17.7888  26
   0   1  15 28.3515 18.2456  31
   0  -1  15 51.6565 19.6425  31
   0  -1  16-4.75859 18.4978  31
   0  -1  16-21.1821 17.0715  26
   0   1  16-10.6001 17.3966  31
   0   1  16 17.8933 16.8207  26
   0  -1  17 52.1631 18.7445  31
   0   1  17 45.3467 18.0127  26
   0  -1  17 13.7850 16.4022  26
   0   1  17 42.4913 17.5229  31
   0   1  18 12.8627 15.8329  26
   0   1  18-20.1079 24.9696   8
   0  -1  18-1.40678 17.0832  31
   0   1  18-16.1016 15.9415  31
   0  -1  18 4.80390 16.2284  26
   0  -1  19 83.9913 16.4572  26
   0  -1  19 65.4006 16.3475  31
   0   1  19 100.058 24.5640   8
   0   1  19 91.6455 17.2513  26
   0   1  19 106.995 16.5962  31
   0  -1  20 23.4046 12.8831  31
   0   1  20 11.0103 11.1894  31
   0  -1  20 16.0180 12.8875  26
   0   1  20-7.78317 12.0628  26
   0   1  20 3.49997 19.0741   8
   0   1  21 22.9960 15.1974   8
   0   1  21 21.4070 9.65835  26
   0  -1  21 19.1042 9.83966  31
   0  -1  21 28.7212 10.8295  26
   0   2   0 7362.55 258.056  18
   0   2   0 7470.50 263.985   5
   0   2   1 30.3447 12.2547  18
   0   2   1 14.9077 21.0236   6
   0   2  -1 27.9869 13.8473  18
   0   2   1-8.81050 20.8196   5
   0   2   1 11.3372 19.7165   1
   0   2  -1 12.3638 23.3052   5
   0   2  -2 8307.48 293.971  18
   0   2   2 8375.60 298.634   1
   0   2   2 8508.12 291.266  18
   0   2   2 8475.07 296.588  11
   0   2   2 8386.18 296.896   6
   0   2  -3 657.832 36.6089  18
   0   2   3 592.241 38.8559   1
   0   2   3 575.061 37.9228  11
   0   2  -4 47056.3 1585.26  18
   0   2   4 46501.4 1588.13  11
   0   2   4 45987.3 1594.37  16
   0   2   4 46516.1 1588.17   1
   0   2   5 248.440 28.3916  11
   0   2   5 240.241 27.5073   1
   0   2   5 291.494 35.9962  16
   0   2   5 190.776 29.7239   2
   0   2   6 16892.4 568.969  16
   0   2  -6 16034.9 557.207  18
   0   2   6 15908.7 560.642   2
   0   2   6 15875.0 561.041  11
   0   2   7 14.3470 21.8469  16
   0   2   7 6.26593 15.3439  11
   0   2   7 16.3434 16.6713   2
   0   2   8-6.36869 24.2409  16
   0   2   8-18.4100 16.7197  11
   0   2   8 36.4170 18.5687   2
   0   2   9 38.5192 20.0386   2
   0   2   9-3.54591 23.8832  16
   0   2  10 1539.72 82.4054  16
   0   2  10 1450.19 74.2460   2
   0   2 -11 14.5626 16.6800  29
   0   2  11 13.0616 20.8492   2
   0   2  11 30.6496 27.1534  16
   0  -2  11 15.3932 20.2034   3
   0   2  12-21.8854 23.6115   2
   0  -2  12-8.59667 17.9056   3
   0  -2  13 76.6182 24.4506   3
   0  -2  13 75.6362 24.1596   4
   0   2  13 89.1147 28.5807   2
   0   2  14 14065.7 500.532   8
   0   2  15-30.8775 28.2273   8
   0   2  16 1308.56 70.6764   8
   0  -2  16 1372.61 61.0505  26
   0  -2  17-3.16580 15.2611  26
   0   2  17-2.59995 24.7550   8
   0   2  18-4.62288 23.0289   8
   0  -2  18 1.41800 15.0756  26
   0  -2  19-2.39698 12.2818  26
   0   2  19 23.1600 19.7771   8
   0   2  20 517.119 33.5860   8
   0  -2  20 622.325 29.3461  26
   0   3   0 8.48956 12.7740  18
   0   3   0-2.67566 20.5706   1
   0   3   0 14.5790 23.7148   5
   0   3   0 8.95090 22.8054   6
   0   3   1 73.6188 14.9870  18
   0   3  -1 70.9547 25.3064   5
   0   3  -1 88.5154 17.0904  18
   0   3   1 64.6040 23.0564   1
   0   3   1 77.9698 25.0678   6
   0   3  -2 69.9350 18.8167  18
   0   3   2 49.3796 24.3800   1
   0   3   2 57.3472 26.4983   6
   0   3  -2 18.6208 28.1959   5
   0   3  -3 6906.95 243.816  18
   0   3  -3 6590.51 253.137   5
   0   3   3 6684.93 249.133   1
   0   3   4 30.7853 18.6984   1
   0   3  -4 55.9355 18.9453  18
   0   3  -5 1259.27 59.5111  18
   0   3   5 1279.00 63.5227   1
   0   3   6 92.8815 21.8485   1
   0   3  -6 163.886 23.2733  18
   0   3  -7 6561.24 241.423  18
   0   3  -9 71.6461 19.4664  29
   0   3   9 37.0184 16.6184  25
   0   3   9 57.6839 25.0818   8
   0   3 -10 33.6281 19.0141  29
   0   3  10 20.6707 27.6221   8
   0  -3  10 5.52081 13.1516  22
   0   3 -11 952.386 52.3569  29
   0  -3  11 1062.78 48.2659  22
   0   3  11 1106.93 58.8661   8
   0   3  12 31.2801 27.7918   8
   0  -3  12 3.01362 14.8972  22
   0   3 -12 55.3102 23.5426  29
   0   3 -13 389.820 35.0382  29
   0   3  13 442.123 39.6014   8
   0  -3  13 470.805 28.9089  22
   0   3  14 5.50649 25.8827   8
   0   3 -14 13.3427 21.9006  29
   0   3  15 805.741 50.2520   8
   0   3 -15 635.152 44.0899  29
   0   3  16 7.61028 24.7585   8
   0   3  17 131.321 26.1615   8
   0   3  18 3.81845 19.4031   8
   0   3  19-16.4508 17.1517   8
   0   4   0 16151.4 570.196   6
   0   4   0 15824.5 573.928   1
   0   4   1 182.147 38.3958   6
   0   4  -1 288.166 44.9149   5
   0   4   1 205.091 39.4019   1
   0   4  -1 272.284 43.2374   1
   0   4  -1 217.389 41.8835   6
   0   4  -2 1427.77 79.2152   5
   0   4   2 1300.63 72.2900   6
   0   4   2 1217.00 72.0248   1
   0   4  -2 1311.51 76.3690   6
   0   4   3 118.546 30.1396   1
   0   4  -3 89.7295 38.3868   5
   0   4   4 1012.96 47.3008  25
   0   4   4 949.387 57.6666   1
   0   4  -4 863.157 65.3802   5
   0   4   4 894.891 44.8176   7
   0   4  -5 108.248 43.1393   5
   0   4   5 163.257 23.0345  25
   0   4   5 110.108 27.0390   1
   0   4   5 222.232 35.0196   8
   0   4  -5 156.005 22.7411  29
   0   4   5 172.331 22.0545   7
   0   4   6 375.841 37.9954   8
   0   4  -6 396.823 51.0342   5
   0   4   6 422.770 28.8785  25
   0   4   6 342.710 35.7046   1
   0   4  -6 383.102 28.9399  29
   0   4   7 74.9773 18.6935  25
   0   4  -7 98.8307 42.0748   5
   0   4  -7 46.6694 20.0234  29
   0   4   7 68.6420 28.4921   8
   0   4   8 743.655 49.7924   8
   0  -4   8 669.089 36.9503  22
   0   4   8 816.443 40.7318  25
   0   4  -8 812.006 43.5570  29
   0  -4   9 72.0229 17.4305  22
   0   4   9 40.3878 19.5894  25
   0   4  -9 36.5076 21.8602  29
   0   4   9 68.4055 30.7601   8
   0   4 -10 4030.26 150.213  29
   0  -4  10 3886.16 145.702  22
   0   4  10 3723.29 154.592   8
   0  -4  11 167.569 22.6840  22
   0   4 -11 241.614 29.6000  29
   0   4  11 184.504 36.2498   8
   0   4 -12 556.309 39.4914  29
   0   4  12 486.972 45.6102   8
   0  -4  12 595.139 34.3148  22
   0   4  13 140.151 32.7292   8
   0  -4  13 111.487 20.0850  22
   0   4 -13 166.438 27.1230  29
   0  -4  14 23.4518 14.4494  22
   0   4 -14 16.3525 20.9564  29
   0   4  14 15.1295 26.5438   8
   0   4 -15 1.90632 19.4331  29
   0   4  15 25.4680 23.9873   8
   0  -4  15 17.0232 12.6732  22
   0   4  16 130.113 25.5935   8
   0   4 -16 102.293 21.4480  29
   0   4  17 67.5571 20.8620   8
   0   4 -17 38.1343 19.3885  24
   0   4 -17 87.7740 19.0981  29
   0   4  18 312.876 24.9547   8
   0   4 -18 358.448 25.1854  24
   0   5   0 19.9751 20.9213  25
   0   5   0 73.9404 28.6879   1
   0   5   0 47.1289 27.3539   6
   0   5   0-21.2406 19.9052   7
   0   5  -1 1514.43 72.1942   7
   0   5  -1 1703.06 91.1471   6
   0   5  -1 1534.27 72.4883  25
   0   5   1 1566.57 71.9663  25
   0   5   1 1608.64 72.3793   7
   0   5  -1 1812.45 96.6218   1
   0   5   1 1924.53 93.6416   1
   0   5   2 21.0394 19.5990  25
   0   5   2-16.1693 20.5036   7
   0   5  -2-18.5076 32.1216   6
   0   5  -2 2.09622 23.2822   7
   0   5   2-4.52594 21.9517   1
   0   5  -2 10.5406 21.4239  25
   0   5  -2-16.4527 30.8080   1
   0   5   3 683.415 53.3813   1
   0   5  -3 721.363 63.7000   1
   0   5   3 729.914 41.9478   7
   0   5   3 757.658 42.0177  25
   0   5  -3 683.530 62.5254   6
   0   5   4-1.72709 17.0085   7
   0   5  -4 15.0254 34.7713   6
   0   5   4 18.6282 17.8499  25
   0   5  -4-5.45752 39.6519   5
   0   5   5 14.8700 18.0376  25
   0   5   6 24.1844 17.9992  25
   0   5  -6 7.43673 18.9019  29
   0   5   7 558.381 35.2885  25
   0   5  -7 540.521 36.2278  29
   0  -5   8 52.7965 16.2261  22
   0   5   8 57.5721 19.9816  25
   0   5  -8 56.5879 21.6014  29
   0  -5   9 92.1560 16.3384  22
   0   5   9 112.763 20.6914  25
   0   5  -9 119.884 23.2360  29
   0  -5  10 49.1521 16.0410  22
   0   5 -10 50.7509 21.5429  29
   0  -5  11 31.4572 14.9992  22
   0   5 -11 70.4706 21.3049  29
   0  -5  12 14.1928 14.3901  22
   0   5 -12 10.8597 19.3937  29
   0   5 -13 30.2897 19.6339  29
   0  -5  13 15.6087 12.9757  22
   0   5 -13 17.8058 17.7381  24
   0   5 -14-7.42957 16.6186  24
   0  -5  14 1.14441 11.3028  22
   0   5 -14 16.6630 16.4690  29
   0   5 -15 119.121 17.5790  24
   0   5 -15 132.773 18.4862  29
   0   5 -16 8.39338 12.8149  29
   0   5 -16-13.0754 12.8664  24
   0   6   0 75.9821 20.0973  25
   0   6   0 60.3401 20.8230   7
   0   6   1 57.6466 19.9503  25
   0   6  -1 35.4958 18.8249  25
   0   6   1 39.7334 20.1106   7
   0   6  -1 27.9605 20.2855   7
   0   6   2 949.864 48.8268  25
   0   6   2 930.077 49.1285   7
   0   6  -2 951.070 50.9872   7
   0   6   3 217.165 27.4342   7
   0   6   3 290.096 27.8403  25
   0   6  -3 250.135 32.3645   7
   0   6  -4 5384.19 201.726   7
   0   6   4 5416.67 198.853  25
   0   6   5 30.2919 18.4255  25
   0   6  -5 14.7639 21.9783   7
   0   6  -6 1061.70 57.9108   7
   0   6   6 1228.58 55.3441  25
   0   6   7 31.8242 17.2681  25
   0   6  -7 58.4686 22.1236   7
   0   6  -8 13.4605 20.2928   7
   0   6  -9-1.47921 15.7725  29
   0   6  -9 35.9667 19.5561   7
   0   6 -10 9.66613 14.4943  29
   0  -6  10 2.14201 10.0686  22
   0   6 -11 5.86214 15.7006   7
   0   6 -11 6.28396 13.3972  29
   0   6 -12 39.2154 15.2318   7
   0   6 -12 13.2455 12.3419  29
   0   6 -13-2.79253 10.4373  29
   0   6 -13 22.9992 12.8688   7
   0   7   0-4.06841 14.8157   7
   0   7  -1 60.3071 15.6589   7
   0   7   1 54.9534 14.4586  25
   0   7  -2-1.36922 14.5260   7
   0   7   2 25.8614 13.4362  25
   0   7  -3 70.0601 16.6494   7
   0   7   3 110.033 15.7237  25
   0   7  -4-27.4994 14.9492   7
   0   7   4 1.22526 11.8550  25
   0   7  -5 48.7252 15.0537   7
   0   7   5 96.2474 14.0567  25
   0   7  -6 11.7054 13.3351   7
   0   7  -7 41.7870 13.1376   7
   0   7  -8 20.9686 11.7740   7
   0   7  -9-4.89681 10.6012   7
   1   0  21-4.39607 10.3190  26
   1   0  21-7.57083 14.6530   8
   1   0  20 56.9359 14.5249  26
   1   0  20 81.9315 15.1776  31
   1   0  19 20.9610 15.2199  31
   1   0  19 20.3737 15.8367  26
   1   0  18 826.892 41.7681  31
   1   0  18 787.499 42.6280  26
   1   0  17 19.9701 18.1511  31
   1   0  17 19.6136 18.7266  26
   1   0  16 2099.05 86.4568  26
   1   0  16 2043.43 84.4978  31
   1   0  15-3.12331 18.6285  31
   1   0  15 1.76304 16.7864  26
   1   0  14 95.0437 19.5218  31
   1   0  14 75.9839 18.9831  26
   1   0  14 49.7922 23.1697   2
   1   0  13-13.6008 16.4703  26
   1   0  13 8.24841 15.7592  31
   1   0  13-3.43858 19.8372   2
   1   0  13-13.7142 22.1898   4
   1   0  12 128.670 19.1901  31
   1   0  12 105.710 18.2440  26
   1   0  12 126.879 23.9761   4
   1   0  12 83.2351 25.7064  19
   1   0  11 5.24495 17.8788   4
   1   0  11-15.7990 19.1484  19
   1   0  10 68.4190 18.2959   3
   1   0  10 62.9902 19.0257   4
   1   0  10 62.7654 20.6840  19
   1   0   9-9.54940 15.4466   4
   1   0   9-6.99347 17.0289  19
   1   0   9-5.12386 13.2571   3
   1   0   9 12.2624 15.0940  12
   1   0   8 4771.79 173.528  19
   1   0   8 4512.72 168.193   3
   1   0   8 4599.50 167.461  12
   1   0   8 4534.72 169.712   4
   1   0   7 13.2571 15.1173  19
   1   0   7 7.20135 11.9606   3
   1   0   7-6.53428 12.2872   4
   1   0   7 23.6693 14.3393  12
   1   0   6 14399.3 503.881  19
   1   0   6 14680.3 501.288   4
   1   0   6 14843.4 500.654  12
   1   0   6 14246.2 500.672   3
   1   0   5-10.0564 11.9406  19
   1   0   5 17.0373 10.8943   4
   1   0   5 8.96344 13.4106  12
   1   0   5 2.36012 10.8427   3
   1   0   4 9550.02 330.702   3
   1   0   4 9739.96 333.580  19
   1   0   3 25.1459 8.12954   3
   1   0   3 15.7740 10.7782  19
   1   0   2 16166.4 549.417  19
   1   0   2 16089.2 546.996   3
   1   0   1 2.96493 6.28023  14
   1   0   1 4.83174 2.80888   3
   1   0   1 3.01738 2.84161   4
   1   0   0 7.42130 5.07417  14
  -1   0   0-1.67279 7.70890  20
  -1   0   1 9.45214 7.89074  20
  -1   0   1 0.30387 2.80330   3
  -1   0   1 2.92780 3.18746   4
  -1   0   2 15352.6 526.256  13
  -1   0   2 15960.8 525.876   9
   1   0  -2 15517.1 523.913  21
  -1   0   2 15467.9 523.869   3
  -1   0   2 14981.6 524.344  16
  -1   0   3 24.9877 8.02824   3
  -1   0   3 24.3385 12.0297   9
  -1   0   3 19.0327 9.18807  10
  -1   0   4 9306.76 320.161   3
  -1   0   4 9476.19 320.938  10
  -1   0   4 9331.70 320.778   9
  -1   0   4 9309.63 320.355   4
   1   0  -4 9130.19 320.740  17
  -1   0   5-1.56559 10.7714   3
  -1   0   5 4.03551 12.7509   9
  -1   0   5-5.04036 10.2406   4
  -1   0   5 0.77299 9.38663  10
   1   0  -5 7.49766 12.8085  17
  -1   0   6 13712.7 472.169   3
  -1   0   6 13812.8 472.038   9
   1   0  -6 13451.2 471.848  17
  -1   0   6 13870.1 472.684   4
  -1   0   7 14.5361 13.4724   9
  -1   0   7 4.74933 11.9658   3
  -1   0   7-2.54932 12.0984   4
   1   0  -7-1.15493 12.6477  17
  -1   0   8 4238.90 160.985   4
  -1   0   8 4370.86 159.727   9
   1   0  -8 4330.29 159.958  17
  -1   0   8 4497.05 160.614   3
  -1   0   9 3.69613 14.4803   4
  -1   0   9-3.32619 12.9699   3
  -1   0   9-3.04347 14.6258   9
  -1   0  10 31.6139 16.6508   9
  -1   0  10 19.5273 13.8379   3
  -1   0  10 52.0810 17.8877   4
  -1   0  11 2.01931 17.7720   9
  -1   0  11-2.52327 17.8275   4
  -1   0  12 87.0645 21.6408   9
  -1   0  12 94.3792 17.7553  34
  -1   0  12 63.5311 16.2499  36
  -1   0  12 87.0292 22.1440   4
  -1   0  13-2.73315 15.6314  31
  -1   0  13 3.31311 15.9720  34
  -1   0  13 1.42979 14.6119  36
  -1   0  13-5.15435 19.8129   9
  -1   0  13-13.1522 20.3873   4
  -1   0  13-19.7819 21.3383   2
  -1   0  14 55.7075 17.1960  36
  -1   0  14 39.7727 22.7089   9
  -1   0  14 29.3563 21.2084   2
  -1   0  14 26.6000 17.3176  31
  -1   0  15-15.5625 18.1497  31
  -1   0  15-1.63151 16.4902  36
  -1   0  16 2003.37 84.5460  31
  -1   0  16 2142.63 86.0162  26
  -1   0  17 7.68070 16.7008  31
  -1   0  17-1.70489 16.3354  26
  -1   0  18 814.352 41.3617  31
  -1   0  18 809.080 41.8127  26
  -1   0  19 7.35444 14.9429  31
  -1   0  19 1.37160 14.2081  26
  -1   0  20 83.4148 14.4636  26
  -1   0  20 82.8025 14.4532  31
  -1   0  20 76.3531 20.2651   8
  -1   0  21 10.5238 9.77269  26
  -1   0  21-7.45942 13.9996   8
  -1   0  21-6.49561 9.68745  31
   1   1  21 5.66116 9.66851  26
   1   1  20 149.855 16.3710  26
   1  -1  20 123.046 15.6680  26
   1   1  20 114.523 21.0528   8
   1   1  19 105.010 24.6304   8
   1  -1  19 92.6775 16.8280  31
   1  -1  19 88.1691 16.5005  26
   1   1  19 88.8707 17.3032  26
   1   1  19 87.3553 15.4585  31
   1  -1  18 139.515 20.1299  31
   1   1  18 160.352 21.0826  26
   1  -1  18 164.479 20.5055  26
   1   1  18 120.504 18.7302  31
   1   1  18 100.792 25.7591   8
   1   1  17 416.741 31.2277  26
   1  -1  17 394.596 29.1048  26
   1   1  17 417.511 28.8912  31
   1  -1  17 439.941 30.2944  31
   1  -1  16 551.172 35.7313  31
   1   1  16 650.652 38.4522  26
   1   1  16 606.803 34.9370  31
   1  -1  16 577.086 36.5828  26
   1  -1  15 68.6694 18.5579  26
   1   1  15 90.4725 19.4669  31
   1   1  15 80.9219 19.9381  26
   1  -1  15 96.1276 21.3710  31
   1  -1  14 75.7437 26.6486   4
   1  -1  14 117.995 21.5933  31
   1   1  14 97.8705 19.7302  31
   1   1  14 112.486 21.1104  26
   1  -1  14 74.8667 20.2575  26
   1  -1  13 505.540 31.8784  26
   1   1  13 528.358 43.0807   2
   1  -1  13 578.576 43.8925   4
   1  -1  13 556.577 31.9337  31
   1   1  13 497.690 32.1944  26
   1   1  13 476.134 29.8966  31
   1   1  12 846.970 54.1209   2
   1  -1  12 961.825 42.8530  31
   1  -1  12 838.367 51.0107   3
   1  -1  12 838.986 52.2490   4
   1   1  12 846.413 42.0204  26
   1   1  12 847.155 41.1371  31
   1  -1  11 53.0758 20.5219   3
   1   1  11 18.8334 13.9908  26
   1  -1  11 8.98910 17.5913  19
   1   1  11 16.8376 20.3978   2
   1  -1  11 2.60584 16.8756   4
   1  -1  10 1471.54 69.6159  19
   1  -1  10 1387.51 65.4314   3
   1   1  10 1352.80 67.2836   2
   1   1   9 1445.78 67.6553   2
   1  -1   9 1594.47 66.5089   3
   1  -1   9 1474.00 65.7173  12
   1  -1   9 1413.41 67.3851  19
   1  -1   8 2109.05 83.5652   3
   1  -1   8 2030.18 82.9840  12
   1   1   8 2109.75 85.0269   2
   1   1   8 1860.84 88.0502  19
   1  -1   8 2118.22 86.1364  19
   1  -1   7 315.171 24.1079  12
   1  -1   7 277.516 24.4242  19
   1   1   7 299.175 23.4969   2
   1   1   6 10873.5 384.905  19
   1  -1   6 11018.4 379.205  12
   1   1   6 11017.4 380.657   2
   1   1   6 10754.1 379.063  14
   1  -1   5 1518.15 60.1895  12
   1   1   5 1451.33 64.2260  19
   1   1   5 1482.98 60.5525   2
   1   1   5 1557.92 60.2608  14
   1   1   5 1391.80 56.5421  12
  -1   1  -5 1538.24 58.7608  15
   1   1   4 19987.3 676.138   2
   1   1   4 19581.5 679.101  19
   1   1   4 19611.0 672.232  12
  -1   1  -4 19891.0 674.445  15
   1   1   3 1664.63 64.8873   1
  -1   1  -3 1660.17 64.0915  15
   1   1   3 1692.43 64.8054   2
   1   1   3 1683.20 61.2106  12
   1   1   2 8607.10 305.762   2
  -1   1  -2 8805.23 304.827  15
  -1  -1  -2 8910.48 307.781  20
   1   1   2 9100.23 306.042   1
   1   1   1 426.801 23.4382   1
   1   1   1 456.164 25.5535  16
   1   1   1 431.264 17.5813  17
  -1  -1  -1 469.498 25.4574  20
   1   1   1 429.983 24.5107  21
   1   1   1 463.892 23.3638   6
  -1   1  -1 425.470 21.2057  15
   1   1   0 31.0318 13.8038   5
  -1  -1   0 61.0937 16.0760  20
  -1   1   0 49.6384 10.8030  15
  -1   1   0 30.3382 13.5323   5
   1   1   0 45.3714 8.33848  17
   1   1   0 20.3898 15.6455  16
  -1   1   1 389.547 21.4938   6
   1   1  -1 415.459 25.0233  21
   1   1  -1 430.881 19.1628  17
  -1  -1   1 427.577 23.5220  13
  -1  -1   1 404.266 18.9699   9
  -1   1   1 391.481 21.5724   1
  -1   1   1 441.685 20.1329  15
  -1   1   2 8884.32 310.911   1
   1   1  -2 9016.83 309.283  17
  -1  -1   2 9078.63 313.096  13
  -1   1   2 9149.98 311.787   2
  -1  -1   2 8963.11 308.766   9
  -1   1   3 1735.47 64.3973   1
  -1  -1   3 1659.14 62.7780   9
  -1   1   3 1615.78 64.7413   2
   1   1  -3 1719.23 63.4787  17
  -1  -1   3 1569.24 66.4369  13
  -1   1   4 19375.7 683.406   9
  -1   1   4 20856.8 690.901  16
  -1   1   4 20021.6 685.869   2
  -1   1   4 20438.6 687.218  11
   1   1  -4 20152.5 684.557  17
  -1   1   5 1297.34 60.0339  16
   1   1  -5 1380.10 54.8134  17
  -1   1   5 1325.97 53.3096   9
  -1   1   5 1324.06 55.4003   2
  -1   1   5 1304.49 56.4811  11
  -1   1   6 11602.3 400.723  16
   1   1  -6 11707.8 394.983  17
  -1   1   6 11041.3 392.783   9
  -1   1   6 11500.1 396.069   2
  -1   1   6 11172.9 397.510  11
  -1   1   7 272.086 22.2666   2
  -1   1   7 254.769 22.2611  11
  -1   1   7 264.611 21.0503   9
   1   1  -7 238.831 21.7173  17
  -1  -1   8 2081.17 82.2136   3
  -1   1   8 2004.98 80.0618   9
   1   1  -8 1964.45 83.0497  17
  -1   1   8 2045.20 84.0791   2
  -1   1   9 1344.96 58.6611   9
  -1  -1   9 1345.43 60.6175   3
  -1   1   9 1301.15 62.5452   2
   1   1  -9 1367.40 62.5772  17
  -1  -1  10 1301.62 62.9297   3
  -1   1  10 1365.70 61.3357   9
  -1   1  10 1437.26 67.2775   2
   1   1 -10 1369.27 65.7312  17
  -1  -1  11 4.27475 18.0287   9
   1   1 -11-5.18946 20.7074  17
  -1   1  11-5.45796 17.4182   2
  -1  -1  11 10.0253 16.3316   4
  -1  -1  11 7.00512 17.5988   3
  -1  -1  12 879.278 52.8826   4
  -1  -1  12 932.084 42.1889  36
  -1   1  12 886.819 42.9976  36
  -1   1  12 850.618 53.7502   2
  -1  -1  12 808.420 50.9499   3
  -1  -1  12 951.974 51.4137   9
  -1   1  12 911.251 44.2048  34
  -1  -1  13 386.675 35.6380   9
  -1  -1  13 456.498 28.5542  36
  -1  -1  13 361.578 34.7600   3
  -1   1  13 347.623 36.8844   2
  -1   1  13 362.514 26.6756  31
  -1  -1  13 497.745 29.4239  31
  -1   1  13 491.936 31.1200  34
  -1  -1  13 401.866 38.5065   4
  -1  -1  14 92.5860 19.8395  31
  -1   1  14 93.9959 20.1689  34
  -1  -1  14 87.5164 26.9615   4
  -1  -1  14 105.335 18.1126  36
  -1   1  14 79.0796 19.1517  31
  -1  -1  15 76.5058 18.8797  31
  -1  -1  15 68.9016 17.4657  36
  -1   1  15 82.7899 19.8927  34
  -1   1  15 49.5685 17.8869  31
  -1  -1  16 651.325 37.9055  36
  -1   1  16 673.227 38.4943  31
  -1  -1  16 754.200 39.4877  31
  -1   1  16 756.790 39.6322  26
  -1  -1  17 394.954 29.5059  26
  -1   1  17 413.964 28.4667  31
  -1  -1  17 400.264 28.8280  31
  -1   1  18 160.643 28.9250   8
  -1   1  18 167.391 20.0536  31
  -1  -1  18 244.628 21.8187  31
  -1  -1  18 164.014 21.0520  26
  -1   1  19 123.133 16.5861  31
  -1  -1  19 115.367 17.1746  26
  -1  -1  19 96.2174 16.5774  31
  -1   1  19 109.435 23.9290   8
  -1  -1  20 106.822 14.9920  31
  -1  -1  20 122.335 15.2337  26
  -1   1  20 105.224 14.1628  31
  -1   1  20 135.371 22.0056   8
  -1  -1  21-6.32826 9.32115  26
  -1   1  21 21.8320 14.5381   8
  -1  -1  21-4.63072 8.93576  31
  -1  -1  21 2.31866 13.5761   8
   1   2  20 57.0791 18.1228   8
   1   2  19 70.1034 20.9439   8
   1   2  19 65.7268 14.2629  26
   1   2  18 88.3451 17.3311  26
   1   2  18 109.797 25.1515   8
   1   2  17 47.7107 18.1554  26
   1   2  17 28.0075 25.6239   8
   1   2  16 133.899 31.2290   8
   1   2  16 59.6989 18.1359  26
   1   2  15 113.945 21.5046  26
   1   2  15 136.627 29.9272   8
   1   2  14 34.7199 18.3934  26
   1   2  14 24.5365 26.9464   8
   1  -2  13 840.197 56.6317   3
   1   2  13 996.741 48.4369  26
   1  -2  13 898.982 58.5277   4
   1   2  13 861.240 71.3672  16
   1   2  12 94.9358 17.8254  26
   1  -2  12 81.6287 21.1314   3
   1   2  12 51.7341 24.3982   2
   1   2  12 93.8152 34.0737  16
   1   2  11 91.9183 24.9990   2
   1  -2  11 73.2472 21.0345   3
   1   2  11 72.5782 17.0490  26
   1   2  11 71.0040 29.2427  16
   1   2  10-8.73826 20.2224   2
   1   2  10 16.9014 26.0025  16
   1  -2  10 23.2993 17.8255   3
   1  -2  10-2.76883 16.7798  19
   1   2   9 3030.66 133.836  16
   1  -2   9 2960.27 120.889  19
   1  -2   9 3061.33 117.466  12
   1   2   9 2765.76 120.457   2
   1   2   8 2715.14 118.340  16
   1   2   8 2594.01 109.427   2
   1  -2   8 2663.76 104.977  12
   1  -2   7 833.378 41.4535  12
   1   2   7 786.608 53.2534  16
   1   2   7 782.507 43.9455   2
   1   2   6 2939.82 125.737  16
   1   2   6 2966.13 117.012   2
   1  -2   6 2993.96 112.362  12
   1   2   5 1588.49 66.4502   1
   1  -2   5 1516.77 61.6631  12
   1   2   5 1404.38 63.7442  21
   1   2   5 1449.02 72.9694  16
   1   2   4 3897.46 146.980  21
   1   2   4 4131.04 149.391   1
   1  -2   4 3912.74 143.528  12
   1   2   4 4103.83 156.454  16
   1   2   3 4401.90 162.033  21
   1   2   3 4417.00 169.855  16
   1   2   3 4466.50 163.565   1
   1   2   2 3425.45 129.324   1
   1   2   2 3466.74 123.868  18
   1   2   2 3380.14 128.229   6
   1   2   2 3418.00 127.384  21
   1   2   2 3222.25 135.243  16
   1   2   1 135.273 22.6783   1
   1   2   1 175.522 23.4881  21
   1   2   1 154.320 17.8421  18
  -1   2  -1 147.920 15.8849  11
   1   2   1 117.505 23.9121   6
  -1   2  -1 84.8270 24.3504   5
  -1  -2   0 23.9764 14.5413  13
  -1   2   0-5.96954 20.7308   5
   1   2   0 26.1590 22.9084   5
  -1   2   0 22.3944 13.3718  15
   1   2   0 20.2150 15.4517  18
  -1   2   0 16.5460 12.3807  11
   1   2  -1 115.653 26.6060   5
  -1   2   1 161.127 23.7642   6
  -1   2   1 209.477 18.5003  11
  -1   2   1 184.127 17.1510  15
  -1  -2   1 221.999 20.7862  13
  -1   2   1 167.139 23.5550   1
  -1   2   2 3220.00 117.821  15
  -1  -2   2 3291.63 122.524  13
   1   2  -2 3423.40 121.856  18
  -1   2   2 3179.04 121.639  11
  -1   2   2 3164.61 122.327   6
  -1   2   2 3245.61 123.617   1
   1   2  -3 4640.48 163.302  18
  -1   2   3 4319.10 163.229  11
  -1   2   3 4378.69 163.522   1
  -1   2   4 3911.13 148.205  11
   1   2  -4 4028.78 147.018  18
  -1   2   4 3971.13 147.081   1
   1   2  -4 3858.96 144.361  17
  -1   2   5 1712.52 70.8928   1
  -1   2   5 1503.69 70.6752  11
   1   2  -5 1742.69 70.8709  18
   1   2  -5 1605.40 68.5073  17
   1   2  -6 2889.32 110.780  17
  -1   2   6 2888.28 112.605   2
  -1   2   6 2790.17 113.649  11
   1   2  -6 2805.15 111.832  18
   1   2  -7 868.253 46.1065  17
  -1   2   7 808.346 47.9073  11
  -1   2   7 962.906 56.4365  16
  -1   2   7 893.345 47.8086   2
  -1   2   8 2449.82 104.822  11
  -1   2   8 2471.95 104.153   2
   1   2  -8 2475.02 102.278  17
  -1   2   8 2581.40 114.613  16
  -1   2   9 2966.49 120.976  11
  -1   2   9 2762.43 118.416   2
  -1  -2  10 2.27775 16.6490   3
  -1  -2  10 15.9763 17.7801   9
  -1   2  10 40.4585 19.2176   2
  -1   2  11 84.0651 23.4200   2
  -1  -2  11 84.3415 20.7888   3
  -1  -2  11 92.7941 21.8840   9
  -1   2  12 50.6060 23.9225   2
  -1  -2  12 45.5585 20.5230   3
  -1  -2  12 45.6610 21.7972   9
  -1  -2  13 907.084 58.5758   4
   1   2 -13 1011.37 53.8330  29
  -1   2  13 1082.78 58.8615   8
  -1   2  14 26.3663 25.8262   8
   1   2 -14 28.7652 22.5064  29
  -1   2  15 75.2124 28.4049   8
   1   2 -15 88.7807 25.4308  29
  -1   2  16 23.6330 24.4548   8
  -1   2  17 48.8893 24.6895   8
  -1  -2  18 57.4749 15.9507  26
  -1   2  18 38.7657 22.3155   8
  -1  -2  19 98.5164 15.4156  26
  -1   2  19 78.3089 20.9829   8
  -1  -2  20 52.7887 12.3915  26
  -1   2  20 56.8681 16.6388   8
  -1   3 -19 51.7856 24.4993  37
   1   3  19 12.5806 15.7972   8
  -1   3 -18 108.631 29.3909  37
   1   3  18 120.463 23.6657   8
   1   3  17-8.76317 22.5724   8
  -1   3 -17 37.1031 29.4819  37
  -1   3 -16 130.175 24.9162  24
   1   3  16 158.188 28.3067   8
   1   3  15 177.635 31.1074   8
   1  -3  14 28.6739 14.7705  22
   1   3  14 48.8164 28.0388   8
   1   3  13 633.790 48.3759   8
   1  -3  13 697.621 37.1417  22
   1   3  12 131.936 32.3754   8
  -1   3 -12 80.2367 24.4183  29
   1  -3  12 68.5455 16.7468  22
   1  -3  11 383.636 26.3278  22
   1   3  11 433.334 53.4651  16
   1   3  11 422.926 38.7437   8
  -1   3 -11 380.793 32.0021  29
   1  -3  10 289.103 22.7410  22
   1   3  10 302.775 46.5412  16
  -1   3 -10 315.445 28.5718  29
   1   3  10 306.081 34.3622   8
   1  -3   9 1753.81 71.5259  22
  -1   3  -9 1752.76 75.7371  29
   1   3   9 1877.42 74.1266  25
   1   3   9 1654.69 98.1845  16
   1   3   9 1687.43 78.7910   8
   1  -3   8 3712.66 137.674  22
  -1   3  -8 3666.95 140.315  29
   1   3   8 3863.77 145.739   8
   1   3   8 3978.17 168.190  16
   1   3   7 327.813 45.0067  16
  -1   3  -7 417.071 31.8446  15
   1   3   6 28.4215 30.1550  16
   1   3   6 35.6171 19.2076   1
   1   3   5 2603.99 109.548   1
   1   3   4 833.425 48.5894   1
  -1   3  -3 100.945 28.5209   5
   1   3   3 93.6011 20.6632   1
   1   3   2 1130.04 58.0025   6
  -1   3  -2 1026.44 59.0882   5
   1   3   2 1092.83 57.8507   1
   1   3   1 3320.55 124.896  18
   1   3   1 3295.07 132.430   6
  -1   3  -1 3332.72 134.628   5
   1   3   1 3254.59 134.142   1
   1   3   0 126.427 29.0911   1
  -1   3   0 141.670 27.9473   1
   1   3   0 183.763 31.6687   5
  -1   3   0 138.063 20.2233  15
  -1   3   0 76.6842 25.5107   6
   1   3   0 158.784 29.2464   6
   1   3   0 161.004 19.5730  18
  -1   3   0 150.679 30.0406   5
  -1   3   1 3259.37 132.668   6
  -1   3   1 3511.72 127.126  15
   1   3  -1 3508.53 138.067   5
  -1   3   1 3250.75 129.514  11
   1   3  -1 3390.09 128.177  18
  -1   3   1 3209.35 134.850   1
  -1   3   2 969.779 51.0446  11
  -1   3   2 994.953 53.6754   6
   1   3  -2 1024.76 60.2958   5
  -1   3   2 1103.58 56.3319   1
   1   3  -2 1029.86 49.8561  18
  -1   3   3 116.360 20.4083  11
   1   3  -3 90.8904 19.5722  18
  -1   3   3 98.0286 21.5941   1
   1   3  -3 37.7735 30.6602   5
   1   3  -4 1148.35 55.3346  18
  -1   3   4 1051.76 56.2906  11
  -1   3   4 1119.68 56.8552   1
  -1   3   5 2557.54 107.163   1
  -1   3   5 2491.18 107.405  11
   1   3  -5 2613.82 105.361  18
  -1   3   6 5.63261 19.6903  11
   1   3  -6 39.0128 18.6649  18
  -1   3   6 37.3577 19.6275   1
   1   3  -7 431.305 34.1524  18
  -1   3   7 413.836 36.3435  11
   1   3  -8 3518.62 137.751  29
  -1   3   8 3952.70 154.668  11
  -1   3   8 3727.49 137.700  25
  -1   3   8 3740.63 143.084   8
   1   3  -9 1853.25 79.3546  29
  -1   3   9 1977.54 93.8991  11
  -1   3   9 1921.03 85.1732   8
  -1   3  10 251.263 33.0403  11
  -1   3  10 219.232 30.3577   8
   1   3 -10 247.854 25.4151  29
  -1   3  11 366.451 36.9607   8
   1   3 -11 324.630 30.2786  29
  -1   3  12 99.4507 28.8427   8
   1   3 -12 66.6274 24.3288  29
   1   3 -13 652.927 42.4961  29
  -1   3  13 662.593 47.6087   8
  -1  -3  13 674.275 36.2382  22
  -1   3  14-2.63915 25.6821   8
   1   3 -14 25.0533 23.5323  29
  -1   3  15 143.750 28.5088   8
   1   3 -15 159.490 27.2799  29
   1   3 -16 155.631 26.5541  29
  -1   3  16 81.0670 26.2891   8
   1   3 -17 44.2304 21.8144  29
  -1   3  17-2.10954 21.6265   8
  -1   3  18 130.167 23.2654   8
  -1   3  19 1.35427 15.6586   8
  -1   4 -17 57.8020 18.1060  24
   1   4  17 46.3129 19.2466   8
  -1   4 -16 3.38367 18.5268  24
   1   4  16-1.94755 21.0703   8
  -1   4 -15 31.9757 28.9030  37
   1   4  15 40.2397 23.7291   8
  -1   4 -15 19.4686 19.5467  29
  -1   4 -15 33.7744 19.8736  24
  -1   4 -14 198.948 34.2997  37
  -1   4 -14 195.427 26.7679  24
  -1   4 -14 197.217 25.6300  29
   1   4  14 188.437 30.4393   8
  -1   4 -13 77.8532 31.2781  37
  -1   4 -13 38.4906 22.3478  29
   1   4  13 33.5076 27.7528   8
   1  -4  13-10.9867 15.2325  22
  -1   4 -12 217.034 35.2755  37
  -1   4 -12 192.532 26.5727  29
   1   4  12 184.140 32.5125   8
   1  -4  12 199.759 21.6063  22
  -1   4 -11 203.021 34.1842  37
   1   4  11 138.900 30.5284   8
   1  -4  11 159.873 20.8371  22
  -1   4 -11 154.336 25.2379  29
  -1   4 -10 262.960 37.7000  37
   1   4  10 195.119 32.4997   8
  -1   4 -10 263.431 27.8453  29
   1   4  10 224.463 23.7167  25
   1  -4  10 250.077 22.8252  22
   1  -4   9 136.222 18.3908  22
   1   4   9 116.369 21.0464  25
  -1   4  -9 153.440 24.1983  29
   1   4   9 114.557 31.8344   8
  -1   4  -9 145.893 36.0492  37
  -1   4  -9 162.055 44.8546   5
  -1   4  -8 187.120 35.2551  37
   1   4   8 139.623 31.6828   8
   1  -4   8 135.665 18.4004  22
   1   4   8 145.897 20.9141  25
  -1   4  -8 132.250 23.8406  29
  -1   4  -8 125.202 42.6818   5
   1   4   7 424.443 37.6071   8
   1  -4   7 433.171 26.6077  22
  -1   4  -7 416.115 51.5258   5
  -1   4  -7 436.759 39.3262  37
   1   4   7 423.895 28.9129  25
  -1   4  -7 421.862 31.3387  29
  -1   4  -7 361.969 35.1277  15
   1   4   6 172.774 32.0814   8
  -1   4  -6 115.809 30.8001  37
   1  -4   6 155.974 16.9455  22
   1   4   6 112.877 20.8368  25
  -1   4  -6 94.7185 20.1762  29
  -1   4  -6 91.5638 25.1743  15
   1   4   6 143.934 26.4319   1
  -1   4  -6 109.658 38.6183   5
   1   4   5 375.786 37.6104   1
   1   4   5 361.626 29.1751  25
   1   4   5 401.082 27.4746   7
  -1   4  -5 460.001 36.0237  15
  -1   4  -5 429.746 30.3499  29
   1   4   5 454.442 39.3000   8
  -1   4  -5 430.554 39.6569  37
  -1   4  -5 318.076 47.3929   5
   1   4   4 840.063 42.6697  25
   1   4   4 790.717 39.9961   7
  -1   4  -4 757.757 47.6519  15
  -1   4  -4 786.048 41.1523  29
  -1   4  -4 808.826 60.6415   5
   1   4   4 749.284 52.3784   1
   1   4   3 58.2374 18.3590  25
   1   4   3 47.0414 17.1737   7
   1   4   3 64.5511 22.8041   1
  -1   4  -3 63.1600 20.6060  15
  -1   4  -3 35.4900 32.6370   5
  -1   4  -2 90.2158 31.6157   5
  -1   4  -2 104.397 21.2159  15
   1   4   2 106.039 26.1589   1
   1   4   2 102.767 28.9749   6
  -1   4  -2 82.4803 29.1677   6
  -1   4  -2 78.2286 28.2543   1
  -1   4  -1 1065.19 53.9234  15
   1   4   1 1079.62 62.9126   1
   1   4   1 1041.64 62.1601   6
  -1   4  -1 1015.55 65.1038   1
  -1   4  -1 857.319 59.6229   6
  -1   4   0 56.0756 18.8558  15
   1   4   0 66.7563 30.3950   6
  -1   4   0 48.6594 25.8953   1
   1   4   0 39.4702 26.1285   1
  -1   4   0 63.1817 27.9662   6
   1   4  -1 1041.52 64.6595   1
  -1   4   1 892.411 55.8640   6
   1   4  -1 937.609 61.8853   6
   1   4  -1 900.642 48.9788  18
  -1   4   1 910.258 57.6913   1
   1   4  -2 147.489 36.9588   6
  -1   4   2 132.725 26.7458   1
   1   4  -2 154.897 22.5770  18
   1   4  -2 143.643 37.0967   5
   1   4  -3 53.9577 24.4747  25
  -1   4   3 92.1427 24.4178   1
   1   4  -3 72.7802 19.9056  18
  -1   4   3 66.6620 16.8109   7
   1   4  -3 96.8431 37.0003   5
  -1   4   4 684.414 37.6218   7
  -1   4   4 801.170 50.1876   1
   1   4  -4 782.011 46.7913  18
   1   4  -4 751.044 63.5599   5
  -1   4   4 757.972 39.0723  25
  -1   4   5 403.087 27.4964  25
  -1   4   5 395.891 27.1440   7
   1   4  -5 432.855 35.6838  18
  -1   4   5 376.895 36.7299   1
  -1   4   5 467.249 38.9989   8
   1   4  -5 392.269 50.7973   5
  -1   4   6 136.551 20.0332  25
  -1   4   6 110.761 23.9693   1
  -1   4   6 167.191 30.8705   8
   1   4  -6 103.721 24.3531  18
   1   4  -6 141.623 45.5104   5
   1   4  -7 396.402 35.4979  18
   1   4  -7 380.892 29.2192  29
  -1   4   7 394.654 28.7723  25
  -1   4   7 365.717 39.3263   8
  -1   4   8 138.749 19.9985  25
   1   4  -8 159.552 27.3215  18
   1   4  -8 144.207 23.3600  29
   1   4  -8 100.395 41.8793   5
  -1   4   8 163.525 32.1782   8
  -1   4   9 138.123 30.7513   8
   1   4  -9 148.396 24.9046  29
   1   4 -10 250.623 28.0195  29
  -1   4  10 200.691 34.2049   8
  -1   4  11 185.234 32.7902   8
   1   4 -11 234.778 28.6966  29
  -1  -4  12 148.671 19.5793  22
   1   4 -12 119.785 24.3833  29
  -1   4  12 148.238 30.5648   8
   1   4 -13 19.1148 21.7105  29
  -1   4  13 30.3711 25.2944   8
  -1  -4  13 10.8507 14.0025  22
  -1  -4  14 203.039 19.8687  22
   1   4 -14 173.961 26.1857  29
  -1   4  14 210.144 30.3463   8
  -1   4  15 26.0339 21.5791   8
  -1  -4  15 39.0631 12.4185  22
   1   4 -15 17.3053 20.5229  29
   1   4 -16 34.5092 19.2716  29
  -1   4  16 15.0689 19.5812   8
   1   4 -17 73.3778 19.0735  29
  -1   4  17 94.1369 20.0361   8
   1   4 -18 1.18060 14.5323  24
   1   4 -18 12.4999 13.7204  29
  -1   5 -16 13.5562 12.9871  24
  -1   5 -15 42.0349 15.4539  24
  -1   5 -15 29.9035 14.1744  29
  -1   5 -14 86.0631 17.8479  24
  -1   5 -14 98.0060 17.8532  29
  -1   5 -13 118.456 20.0430  29
  -1   5 -13 144.237 21.2426  24
  -1   5 -12 276.732 26.7192  24
  -1   5 -12 299.346 27.4553  29
  -1   5 -11 42.5578 20.0259  24
  -1   5 -11 61.1616 21.9860  29
   1  -5  11-1.48643 14.0812  22
  -1   5 -10 53.7096 20.6444  29
  -1   5 -10 32.4044 18.4969  24
   1  -5  10 38.2156 15.5079  22
   1   5   9 72.6606 18.8626  25
  -1   5  -9 77.1651 20.4813  24
   1  -5   9 73.6986 15.8827  22
  -1   5  -9 111.097 22.4589  29
  -1   5  -8 11.7111 19.0205  29
   1   5   8 22.2042 17.7600  25
   1  -5   8 48.3844 14.6153  22
   1   5   7 14.9904 18.3493  25
  -1   5  -7 15.4633 19.8130  29
   1   5   6 22.8517 17.8507  25
  -1   5  -6 9.44699 18.3919  29
  -1   5  -5 355.872 29.7665  29
   1   5   5 331.460 30.1054  25
  -1   5  -4 556.225 35.2138  29
   1   5   4 567.352 37.0462  25
   1   5   4 554.356 35.1739   7
  -1   5  -4 549.197 43.6191  15
  -1   5  -4 474.581 54.3784   6
  -1   5  -4 447.036 55.6171   5
   1   5   3 71.8662 21.9966  25
  -1   5  -3 37.2566 22.2552   7
   1   5   3 59.9115 18.7371   7
  -1   5  -3 64.1191 33.3304   6
  -1   5  -3 52.7711 23.5144  15
  -1   5  -2-26.1238 28.8123   1
   1   5   2 12.6236 17.3335   7
  -1   5  -2 3.99547 20.5828   7
  -1   5  -2 6.38032 18.8738  15
   1   5   2 22.6654 22.5168   1
  -1   5  -2 13.2415 29.3383   6
   1   5   2-4.13146 19.2920  25
   1   5   1 123.582 22.4941  25
  -1   5  -1 121.011 23.8148   7
  -1   5  -1 123.482 33.1775   6
  -1   5  -1 129.090 32.8582   1
   1   5   1 222.232 35.5410   1
   1   5   1 104.268 22.3214   7
   1   5   0-17.4510 30.1069   6
   1   5   0-5.01562 30.3936   1
  -1   5   0 4.73132 27.5280   1
   1   5   0 1.94072 20.7895   7
  -1   5   0-12.3237 27.4812   6
  -1   5   0 5.54455 19.1440   7
   1   5   0 8.81744 22.1517  25
   1   5  -1 164.371 25.6015  25
   1   5  -1 121.703 24.9090   7
  -1   5   1 117.703 21.4925   7
   1   5  -1 100.106 34.2175   6
  -1   5   1 121.229 32.0129   1
   1   5  -1 132.426 36.3664   1
   1   5  -2 5.60510 27.5154   1
   1   5  -2 7.09308 23.0746  25
  -1   5   2 10.4198 17.3021   7
   1   5  -2 8.48042 21.7838   7
   1   5  -2-14.1941 33.8104   6
  -1   5   2-21.6608 22.7348   1
  -1   5   3 37.5108 18.0045   7
   1   5  -3 39.6822 23.6984   7
   1   5  -3 118.274 38.1194   6
   1   5  -3 95.1680 25.8207  25
  -1   5   4 537.951 34.5363  25
   1   5  -4 556.609 43.1887  25
   1   5  -4 543.585 57.5449   6
   1   5  -4 555.111 59.9126   5
  -1   5   4 582.208 35.2243   7
   1   5  -5 204.603 32.3995  25
  -1   5   5 240.084 25.0149  25
   1   5  -6 15.5545 26.1307  25
  -1   5   6 16.0730 17.6461  25
  -1   5   7 32.5351 17.3668  25
   1   5  -7 52.0658 26.7071  25
  -1   5   8 45.5742 17.5892  25
   1   5  -8 7.75678 25.6204  25
  -1  -5   8 10.5758 12.9664  22
   1   5  -9 78.5278 27.5451  25
  -1  -5   9 56.7491 15.2782  22
   1   5  -9 52.0049 20.7290  29
  -1  -5  10 21.3354 15.0814  22
   1   5 -10 40.1550 19.6703  29
  -1  -5  11 35.4503 15.0047  22
   1   5 -11 65.2354 21.8337  29
  -1  -5  12 292.852 23.2327  22
   1   5 -12 351.816 28.9122  29
  -1  -5  13 57.9517 13.8784  22
   1   5 -13 64.0273 19.6095  29
  -1  -5  14 75.6053 13.4868  22
   1   5 -14 70.8220 17.9164  29
   1   5 -15 4.97553 14.2050  24
  -1  -5  15 18.0392 10.1004  22
   1   5 -15 20.2525 15.3791  29
   1   5 -16-10.2216 11.8691  24
   1   5 -16 12.2156 12.2405  29
  -1   6 -13 25.4608 12.1797   7
  -1   6 -13 56.6867 12.1925  29
  -1   6 -12 27.7912 14.2718   7
  -1   6 -12 72.4609 14.1294  29
  -1   6 -11-8.53481 13.7619  29
  -1   6 -11-1.35035 14.8941   7
  -1   6 -10 39.1410 16.0209  29
  -1   6 -10 36.4825 17.1265   7
  -1   6  -9 133.166 21.7354   7
  -1   6  -9 118.384 18.8683  29
   1   6   8 185.219 20.6932  25
  -1   6  -8 122.908 22.1472   7
  -1   6  -8 172.265 20.7114  29
  -1   6  -7 112.127 21.2017   7
  -1   6  -7 68.6008 17.8144  29
   1   6   7 117.038 19.0249  25
  -1   6  -6 285.247 29.3757   7
  -1   6  -6 350.224 26.5565  29
   1   6   6 369.089 28.1850  25
   1   6   5 76.8408 19.1151  25
  -1   6  -5 70.3294 21.7915   7
   1   6   4 9.47682 18.2953  25
  -1   6  -4 47.0669 20.1154   7
   1   6   3 739.608 42.3967  25
  -1   6  -3 711.256 42.0762   7
   1   6   2 863.177 45.8021   7
   1   6   2 902.506 47.5706  25
  -1   6  -2 806.139 45.9878   7
   1   6   1 84.2648 21.9153   7
  -1   6  -1 157.509 23.6265   7
   1   6   1 113.861 22.9566  25
   1   6   0 17.3309 19.1404   7
  -1   6   0 12.8312 18.7423   7
   1   6   0 27.6108 20.0396  25
  -1   6   1 93.0040 21.1816   7
   1   6  -1 154.097 24.5239   7
   1   6  -1 156.472 25.2929  25
   1   6  -2 951.936 50.5054   7
   1   6  -2 897.677 50.9948  25
  -1   6   2 917.782 46.4949   7
  -1   6   3 657.895 38.5847   7
   1   6  -3 721.330 43.5562  25
   1   6  -3 679.689 42.3090   7
   1   6  -4 4.44668 21.2583  25
   1   6  -4 55.9166 22.3720   7
   1   6  -5 70.4433 22.9638  25
   1   6  -5 49.3991 22.5341   7
  -1   6   5 67.7315 16.9714  25
  -1   6   6 445.740 29.2175  25
   1   6  -6 389.524 33.8079  25
   1   6  -6 406.508 33.6672   7
   1   6  -7 105.295 22.5388   7
   1   6  -7 47.1117 21.0232  25
   1   6  -8 136.566 23.5121   7
   1   6  -9 78.6877 21.0216   7
   1   6 -10 3.09672 16.4221   7
  -1  -6  10 10.4273 10.8045  22
   1   6 -11 14.9932 16.2664   7
  -1  -6  11 14.3461 9.75881  22
   1   6 -12 56.7649 14.9456   7
   1   6 -12 57.8726 13.2988  29
  -1  -6  12 34.6004 9.60586  22
   1   6 -13 34.6222 12.2445   7
   1   6 -13 31.1718 10.9420  29
  -1   7  -8 126.147 13.9308   7
  -1   7  -7 25.1006 11.4542   7
   1   7   6 90.2802 13.7225  25
  -1   7  -6 98.5154 14.6579   7
  -1   7  -5 21.5788 13.3716   7
   1   7   5 17.9200 12.3261  25
   1   7   4 37.8880 13.2135  25
  -1   7  -4 13.1044 12.8532   7
   1   7   3 279.952 21.0608  25
  -1   7  -3 216.697 20.1270   7
   1   7   2 375.556 24.5976  25
  -1   7  -2 307.668 23.1077   7
  -1   7  -1 102.854 16.3016   7
   1   7   1 135.585 18.2467  25
   1   7   0 9.90711 14.1453  25
   1   7  -1 81.6978 16.6504  25
   1   7  -1 79.7513 16.1084   7
   1   7  -2 322.966 24.1722   7
   1   7  -2 346.679 24.2566  25
   1   7  -3 285.983 22.4415  25
   1   7  -3 269.953 21.9449   7
   1   7  -4 12.3387 13.6164   7
   1   7  -4 15.5208 13.7938  25
   1   7  -5 19.9072 13.4509   7
   1   7  -5 31.4149 13.5410  25
   1   7  -6 73.8443 14.4642   7
   1   7  -7 27.5203 11.7376   7
   1   7  -8 142.045 14.8293   7
   2   0  20 5.25150 12.0930  26
   2   0  19-2.65573 14.2248  26
   2   0  18 170.191 20.4926  31
   2   0  18 183.593 21.2673  26
   2   0  17 35.9363 17.7300  26
   2   0  17-10.4128 17.4239  31
   2   0  16 39.1315 18.9687  31
   2   0  16 30.2741 17.5226  26
   2   0  15 3.54736 16.4550  26
   2   0  15 3.14292 18.5177  31
   2   0  14 433.106 30.9546  31
   2   0  14 409.991 31.2296  26
   2   0  13 13.9447 26.3482  19
   2   0  13 6.29104 17.0155  26
   2   0  13-10.0801 17.3156  31
   2   0  12 786.571 39.5648  31
   2   0  12 805.242 57.4748  19
   2   0  12 767.553 39.8517  26
   2   0  11 11.6287 14.8448  26
   2   0  11-2.19905 18.5502  12
   2   0  11-1.22291 15.3072  31
   2   0  11 29.5012 23.5379  19
   2   0  10 545.628 36.0838  12
   2   0  10 585.180 43.5986  19
   2   0   9 4.20455 14.6819  14
   2   0   9 8.66891 16.5083  12
   2   0   9-2.77862 18.4694  19
   2   0   8 2604.27 103.967  14
   2   0   8 2569.68 108.203  19
   2   0   8 2558.82 101.523  12
   2   0   7 6.14243 15.8941  19
   2   0   7 1.64090 14.2824  14
   2   0   7 15.1066 15.1485  12
   2   0   6 8135.14 283.296  14
   2   0   6 7827.94 285.685  19
   2   0   5 2.87933 13.6659  19
   2   0   5 10.1750 13.1411  14
   2   0   4 112.037 16.4925  19
   2   0   4 87.5004 16.4713  14
   2   0   3 1.99339 11.2238  19
   2   0   3 3.97567 11.9991  14
   2   0   2 8946.11 307.464  14
   2   0   2 8795.05 306.917  19
   2   0   1 26.7424 12.3520  14
   2   0   1 12.5875 9.00159  19
  -2   0   0 6207.07 221.328  20
   2   0   0 6224.58 217.051  14
  -2   0   1-1.12731 15.9523  20
  -2   0   2 8291.51 290.102  20
  -2   0   3 17.0262 13.3208  13
  -2   0   3 1.97960 10.4730  10
  -2   0   4 59.3823 13.6178  13
  -2   0   4 92.1085 14.0300  10
   2   0  -5 21.3949 15.1266  17
  -2   0   5 9.66973 11.9117  10
  -2   0   5 13.4717 14.1863   9
   2   0  -6 7124.23 262.657  17
  -2   0   6 7561.71 262.648  10
  -2   0   6 7528.22 261.981   9
  -2   0   7 4.14727 15.2866   9
   2   0  -7 17.0130 16.0242  17
  -2   0   8 2194.09 88.5598   9
   2   0  -8 2149.00 89.6743  17
   2   0  -9 24.4693 17.6223  17
  -2   0   9 14.0831 16.2346   9
  -2   0  10 582.169 37.2425   9
   2   0 -10 553.874 40.0579  17
  -2   0  11-6.32589 11.8155  36
  -2   0  11-1.43767 13.6018  34
  -2   0  11 6.70036 19.0656   9
  -2   0  12 893.249 42.1737  36
  -2   0  12 847.488 43.2557  34
  -2   0  12 799.832 49.2432   9
  -2   0  13 7.49267 15.1893  36
  -2   0  13 12.2251 18.3327  34
  -2   0  13 5.50496 21.2641   9
  -2   0  14 548.407 35.4003  34
  -2   0  14 442.710 31.3910  36
  -2   0  15-18.0716 16.7510  36
  -2   0  15-14.0620 17.6026  31
  -2   0  16 9.30407 17.1498  31
  -2   0  16 19.6050 16.4715  36
  -2   0  17 3.11508 14.7830  26
  -2   0  17 1.47164 16.4966  31
  -2   0  18 152.079 19.6133  31
  -2   0  18 157.674 18.2023  26
  -2   0  19-8.24195 12.4222  26
  -2   0  19 11.1846 13.4222  31
  -2   0  20 19.2474 11.3429  31
  -2   1 -20 147.674 26.2698  39
   2   1  20 126.729 15.0716  26
   2   1  19 66.8003 15.6298  26
   2   1  18 15.5165 15.9082  26
   2   1  17 396.574 26.9538  31
   2  -1  17 363.817 26.8912  31
   2   1  17 337.963 28.0498  26
   2   1  16 61.2122 17.3870  31
   2  -1  16 21.8707 18.0929  31
   2   1  16 58.0018 20.0530  26
   2   1  15 3551.38 135.258  31
   2  -1  15 3590.66 136.782  31
   2   1  15 3707.96 138.609  26
   2   1  14 2548.68 99.9463  31
   2  -1  14 2560.28 101.650  31
   2   1  14 2630.68 103.526  26
   2   1  13 1631.27 71.3087  31
   2  -1  13 1895.50 73.4585  31
   2  -1  13 1644.18 91.6866  19
   2   1  13 1744.32 73.2979  26
   2  -1  12-7.99706 21.6345  19
   2   1  12 24.1497 17.7176  26
   2   1  12 8.85594 15.4885  31
   2  -1  12 24.8359 17.5567  31
   2   1  11 2325.36 90.8312  31
   2  -1  11 2458.32 92.8001  31
   2  -1  11 2406.65 101.920  12
   2  -1  11 2373.05 109.513  19
   2   1  11 2351.58 92.5314  26
   2  -1  10 2743.85 111.581  12
   2  -1  10 2707.30 117.519  19
   2  -1   9 10461.9 366.225  12
   2  -1   9 10281.8 371.938  19
   2   1   9 10090.2 374.941  19
   2   1   8 3939.12 153.661  14
   2  -1   8 4042.05 152.087  12
   2  -1   8 4030.44 156.630  19
   2   1   8 4089.73 159.544  19
   2   1   7 183.804 22.1037  14
   2  -1   7 140.994 20.8429  12
   2   1   7 127.681 22.8442  19
   2  -1   7 136.055 20.7221  19
   2   1   6 430.313 30.0550  14
   2   1   6 471.536 32.9457  19
   2   1   5 24950.7 850.505  19
   2   1   5 24500.5 848.369  14
   2   1   4 4867.86 178.494  19
  -2  -1  -3 1235.91 58.4018  20
   2   1   3 1256.26 55.1958  19
  -2  -1  -2 2053.92 86.2620  20
   2   1   2 2078.48 81.0930  19
  -2  -1  -1 84082.1 2839.42  20
  -2   1  -1 83402.5 2831.90  10
  -2  -1   0 190390. 6379.95  20
   2   1   0 187199. 6377.29  21
  -2   1   0 186766. 6373.62  10
   2   1   0 189300. 6370.76  17
   2   1  -1 85552.9 2922.30  21
  -2  -1   1 86396.6 2924.69  20
  -2   1   1 86247.4 2919.00  10
   2   1  -1 86277.0 2916.36  17
  -2  -1   2 2471.63 99.7026  13
   2   1  -2 2437.68 97.9006  21
  -2   1   2 2392.03 93.9679  10
   2   1  -2 2632.71 92.5400  17
  -2  -1   3 1310.39 60.9347  13
   2   1  -3 1457.02 56.5292  17
  -2  -1   4 5068.02 181.035  13
  -2  -1   4 4765.40 176.047   9
   2   1  -4 4980.65 175.982  17
  -2  -1   5 24933.5 839.598   9
   2   1  -5 24142.1 839.698  17
  -2  -1   6 421.180 26.4835   9
   2   1  -6 399.608 27.7930  17
  -2  -1   7 205.563 21.5845   9
   2  -1  -7 216.739 24.2675  17
   2   1  -7 191.818 21.9097  17
   2  -1  -8 3967.41 150.269  17
  -2   1   8 3999.21 152.318  11
  -2  -1   8 3819.57 147.221   9
   2   1  -8 3870.41 148.611  17
  -2  -1   9 9947.82 346.807   9
  -2   1   9 9732.74 345.358   9
   2   1  -9 9547.56 348.545  17
  -2  -1  10 2868.20 114.003   9
  -2   1  10 2700.05 111.778   9
   2   1 -10 2884.88 117.461  17
  -2   1  11 2567.21 92.5648  36
   2   1 -11 2216.66 104.473  17
  -2  -1  11 2326.47 92.0729  36
  -2  -1  11 2499.66 93.6456  32
  -2  -1  11 2330.78 100.730   9
  -2   1  11 2310.99 93.5853  34
  -2   1  11 2290.02 99.0389   9
  -2   1  12 3.25885 15.5428  34
  -2   1  12 46.1556 14.6338  36
  -2  -1  12 36.4859 15.4783  32
  -2  -1  12 44.0187 21.5062   9
  -2  -1  12 19.8046 14.6049  36
   2   1 -12 27.1679 25.4826  17
  -2  -1  13 1816.27 74.8441  36
  -2   1  13 1655.21 75.5410  34
  -2   1  13 1814.09 74.8683  36
  -2  -1  13 1789.90 84.9847   9
  -2  -1  13 1919.76 76.4683  32
  -2   1  14 2627.51 105.722  34
  -2  -1  14 2642.57 103.411  36
  -2  -1  15 3779.63 134.885  31
  -2   1  15 3365.09 136.585  34
  -2   1  15 3632.97 133.755  31
  -2  -1  15 3400.19 134.077  36
  -2  -1  16 67.6167 17.6698  36
  -2  -1  16 41.3033 17.6185  31
  -2   1  16 74.8391 20.0154  34
  -2   1  16 28.1124 16.4845  31
  -2  -1  17 320.395 25.6468  36
  -2  -1  17 355.777 27.3836  31
  -2  -1  18 46.4222 15.3909  26
  -2  -1  18 25.5172 15.3038  31
  -2   1  18 7.35741 13.8339  31
  -2   1  19 118.687 15.3859  31
  -2  -1  19 129.604 16.8114  31
  -2  -1  19 113.570 15.8167  26
  -2   1  20 157.954 14.2543  31
  -2  -1  20 132.561 14.1397  31
  -2  -1  20 132.147 14.5548  26
  -2   2 -20 22.5461 25.8596  37
   2   2  18 6.96693 15.2968  26
   2   2  17 19.2160 15.8285  26
   2   2  16 514.483 33.8125  26
   2   2  15 138.795 22.2600  26
   2   2  14 127.219 22.1373  26
   2   2  13 636.190 37.1895  26
   2   2  12 38.7758 18.0566  26
   2   2  12 28.7141 32.2999  16
   2  -2  12 76.9775 26.8010  19
   2  -2  11 1052.65 58.5460  12
   2  -2  11 940.522 61.9480  19
   2   2  11 1058.87 49.8596  26
   2   2  11 1149.33 76.3229  16
   2  -2  10 24.1215 21.4769  12
   2   2  10 9.43589 29.6948  16
   2   2  10 15.1208 16.0807  26
   2  -2  10 29.2181 12.0112  22
   2  -2  10 16.4295 19.4537  19
   2  -2   9 39.3363 20.4342  12
   2   2   9 25.3520 27.9208  16
   2  -2   9 23.7293 20.8611  19
   2   2   8 391.879 41.0421  16
   2  -2   8 338.173 30.3509  12
   2   2   7 6300.15 230.202  16
   2  -2   7 5958.44 214.998  12
   2   2   7 5544.29 217.333  21
  -2   2  -6 83.7566 17.1091  15
   2  -2   6 93.5523 19.4068  12
   2   2   6 98.8360 26.2447  16
   2   2   6 93.4030 21.7500  21
  -2   2  -5 59.0527 16.3988  15
   2   2   5 61.5888 20.2567  21
   2   2   5 70.1040 26.1593  16
  -2   2  -4 4290.46 158.636  15
   2   2   4 4301.85 161.721  21
  -2  -2  -4 3929.03 162.711  20
   2   2   3 1472.62 65.7268  21
  -2   2  -3 1435.12 61.2836  15
  -2  -2  -3 1324.70 65.4475  20
   2   2   3 1462.03 68.6272  16
  -2   2  -2 255.759 21.6494  15
   2   2   2 191.267 25.2305  21
  -2  -2  -2 223.799 25.6578  20
   2   2   1 240.766 27.1773  21
  -2  -2  -1 201.704 26.0856  20
  -2   2  -1 207.924 19.9947  15
   2   2   0 1184.57 55.2095  21
  -2   2   0 1049.47 49.2591  11
  -2   2   0 1158.11 49.5668  15
  -2   2   1 281.223 21.9568  11
  -2  -2   1 258.543 24.9805  13
   2   2  -1 273.917 28.5954  21
  -2  -2   2 238.982 24.9834  13
  -2   2   2 240.984 22.5810  11
  -2  -2   3 1359.40 62.7073  13
  -2   2   3 1295.69 60.3043  11
   2   2  -3 1333.42 56.2170  17
  -2   2   4 4492.51 168.295  11
   2   2  -4 4254.66 162.327  17
  -2  -2   4 4770.58 169.999  13
  -2   2   5 51.4872 17.3562  11
   2   2  -5 48.4051 17.1168  17
  -2   2   6 107.758 21.4822  11
   2   2  -6 161.026 21.5101  17
  -2   2   7 6209.18 226.878  11
   2   2  -7 5797.26 223.745  18
   2   2  -7 6037.74 220.654  17
  -2   2   8 276.265 29.9481  11
   2   2  -8 259.387 29.0445  17
  -2  -2   9 24.4352 13.3860  32
  -2   2   9 22.3691 18.9257  11
   2   2  -9 36.1530 22.2341  17
  -2   2  10 36.3035 15.9738  34
  -2  -2  10 33.9501 15.3770  32
   2   2 -10 23.5735 23.6446  17
  -2  -2  10 26.3382 14.1805  36
  -2  -2  11 1061.26 48.1051  32
  -2   2  11 949.794 47.4935  34
  -2  -2  11 987.784 46.5039  36
   2   2 -11 1030.79 61.3665  17
  -2   2  12 16.9473 16.0020  34
  -2  -2  12 19.8501 16.0171  32
  -2  -2  12 33.8533 15.6689  36
  -2   2  13 507.949 34.2832  34
  -2  -2  13 554.105 32.3647  36
  -2  -2  14 119.068 18.7526  36
  -2   2  14 102.381 20.1816  34
  -2  -2  15 169.017 20.4581  36
  -2   2  15 170.463 22.8181  34
   2   2 -15 135.228 28.7705  29
  -2   2  16 471.140 31.1949  34
  -2  -2  16 460.898 29.1123  36
   2   2 -16 434.103 38.0958  29
  -2  -2  17 23.5014 14.4949  36
   2   2 -17 34.2189 24.1465  29
  -2  -2  19 30.4737 12.5013  26
  -2  -2  20 11.7737 9.48391  26
  -2   3 -19 345.436 31.9571  37
  -2   3 -18 137.882 28.8175  37
  -2   3 -17 76.8960 30.6807  37
  -2   3 -16 63.1624 32.6475  37
  -2   3 -15 1391.58 66.2913  24
  -2   3 -14 1736.78 78.3882  24
  -2   3 -13 411.983 34.0044  24
  -2   3 -12 462.308 34.6373  24
   2   3  12 349.934 29.5502  26
   2  -3  11 1624.51 85.5559  19
  -2   3 -11 1610.74 71.8094  24
   2  -3  11 1570.28 66.9360  22
   2   3  11 1496.68 67.5788  26
   2   3  11 1637.41 101.856  16
   2  -3  10 643.657 34.9202  22
   2  -3  10 596.134 47.0533  19
   2   3  10 647.538 62.1673  16
   2   3  10 617.117 35.8967  26
  -2   3  -9 1842.05 77.4696  29
   2  -3   9 1807.12 73.8552  22
   2   3   9 1780.22 101.770  16
   2   3   8 311.150 45.2255  16
   2  -3   8 347.171 23.9469  22
  -2   3  -8 325.523 27.0428  29
   2  -3   7 682.369 33.7286  22
  -2   3  -7 655.516 36.9185  29
  -2   3  -7 565.341 42.1627  37
   2   3   7 734.862 58.6599  16
  -2   3  -6 746.536 44.6241  15
   2   3   6 640.066 53.3633  16
  -2   3  -5 3295.96 128.863  15
   2   3   5 3081.41 129.657  21
   2   3   5 3303.19 143.833  16
   2   3   4 6305.54 232.093  21
  -2   3  -4 6163.63 229.253  15
  -2   3  -3 30.3429 18.0474  15
   2   3   3 52.4649 23.2404  21
  -2   3  -2 305.848 28.4193  15
  -2   3  -1 4292.28 161.828  15
  -2   3   0 10136.3 359.342  15
   2   3   0 10181.4 360.823  18
  -2  -3   1 3835.05 155.403  13
   2   3  -1 4120.31 154.437  18
  -2   3   1 4049.01 151.375  15
  -2  -3   2 246.493 28.1827  13
  -2   3   2 183.322 25.3945  11
   2   3  -2 252.695 28.6384  18
  -2   3   3 31.8792 17.6506  11
   2   3  -3 27.3469 18.9364  18
  -2   3   4 5661.21 213.231  11
   2   3  -4 5582.08 211.764  18
  -2   3   5 3376.68 138.054  11
   2   3  -5 3326.73 136.013  18
  -2   3   6 596.128 43.6630  11
   2   3  -6 655.866 44.0057  18
  -2   3   7 617.972 47.2781  11
   2   3  -7 701.851 35.8930  33
  -2   3   7 696.388 34.8806  34
   2   3  -7 592.155 44.2888  18
  -2   3   8 415.529 26.6581  34
   2   3  -8 346.679 26.7717  33
  -2   3   8 367.879 37.5375  11
   2   3  -9 1766.87 77.6820  33
  -2   3   9 1873.18 94.2445  11
  -2   3   9 1943.33 76.7833  34
  -2   3  10 620.097 34.3509  34
  -2   3  10 500.104 47.6998  11
   2   3 -10 557.561 37.0861  29
  -2   3  11 1481.86 65.3713  34
   2   3 -11 1521.93 69.3600  29
  -2   3  12 304.956 25.8437  34
   2   3 -12 253.396 30.5605  29
  -2   3  13 353.943 27.7507  34
   2   3 -13 354.408 34.0912  29
  -2   3  14 1451.83 64.2984  34
   2   3 -14 1451.67 70.3767  29
   2   3 -15 1367.07 66.8174  29
   2   3 -16 84.8434 24.0562  29
   2   3 -17 44.2854 22.0250  29
  -2  -3  18 140.764 15.3097  26
   2   3 -18 85.4537 21.3083  29
  -2  -3  19 370.275 20.4060  26
  -2   4 -17 39.8660 15.1414  24
  -2   4 -17 19.9029 22.2454  37
  -2   4 -16 1.84304 25.8176  37
  -2   4 -16-1.52570 16.7871  24
  -2   4 -15 225.141 33.3725  37
  -2   4 -15 207.232 24.2451  24
  -2   4 -14 25.4196 29.8171  37
  -2   4 -14 18.9651 20.4801  24
  -2   4 -13 41.8537 23.3196  24
  -2   4 -13 86.1294 32.9807  37
  -2   4 -12 303.637 29.2446  24
  -2   4 -12 232.486 37.8028  37
  -2   4 -12 250.358 27.7925  29
  -2   4 -11 236.307 36.7677  37
  -2   4 -11 236.077 28.6783  24
  -2   4 -11 217.693 27.3357  29
  -2   4 -10 59.7341 29.8181  37
  -2   4 -10 47.8886 21.7065  24
   2  -4  10 36.0955 17.0790  22
  -2   4 -10 71.2039 22.4867  29
  -2   4  -9 61.5931 35.4812  37
  -2   4  -9 28.9532 20.5338  24
   2  -4   9 22.4467 15.5219  22
  -2   4  -9-1.94825 20.3007  29
  -2   4  -8 231.530 36.9510  37
  -2   4  -8 157.277 23.9092  24
  -2   4  -8 176.717 24.9332  29
   2  -4   8 173.143 20.2075  22
  -2   4  -7 1614.41 78.8624  37
  -2   4  -7 1559.49 78.7152  15
  -2   4  -7 1479.97 67.8518  24
   2  -4   7 1555.09 65.5413  22
  -2   4  -7 1552.76 69.2471  29
  -2   4  -6 62.0485 19.8306  24
  -2   4  -6 62.0407 30.2091  37
  -2   4  -6 88.9815 22.1260  29
  -2   4  -6 47.4477 23.0769  15
   2  -4   6 56.0996 14.7157  22
  -2   4  -5 18.5178 29.9706  37
   2   4   5 16.8208 17.2526  25
  -2   4  -5 32.4744 19.6489  29
  -2   4  -5 21.1596 19.9753  15
  -2   4  -4 60.5197 29.9240  37
  -2   4  -4 34.7447 19.7356  15
   2   4   4 75.8282 20.5058  25
  -2   4  -4 82.4466 19.1067  29
  -2   4  -3 1552.53 74.9120  15
   2   4   3 1473.34 68.0118  25
  -2   4  -3 1556.06 66.7637  29
  -2   4  -2 53.6620 20.8335  15
  -2   4  -2 74.7436 17.8379  29
  -2   4  -2 47.4581 22.6849  27
   2   4   2 66.8680 20.9279  25
  -2   4  -1 767.972 47.3927  15
   2   4   1 739.686 43.4768  25
  -2   4  -1 823.682 41.3480  29
  -2   4  -1 824.763 42.9237  27
  -2   4   0 913.874 52.5339  15
  -2   4   0 1001.94 46.6588  29
   2   4   0 977.630 53.0509  25
  -2   4   0 1085.04 49.8711  27
   2   4  -1 761.069 45.9357  25
   2   4  -1 723.744 45.6024  18
  -2   4   1 755.059 39.9141  27
   2   4  -2 40.3318 23.4414  25
   2   4  -2 77.7911 20.7438  18
  -2   4   2 75.0656 19.4450  27
   2   4  -3 1579.24 76.1806  18
  -2   4   4 93.5207 23.3742  11
   2   4  -4 104.039 23.1096  18
  -2   4   4 105.769 18.3516  34
  -2   4   5 69.1093 16.8061  34
  -2   4   5 19.2665 20.2792  11
   2   4  -5 34.5411 21.3288  18
  -2   4   6 100.524 17.3782  34
  -2   4   6 33.0245 21.1087  11
   2   4  -6 59.3895 24.0880  18
  -2   4   7 1566.16 64.5876  34
  -2   4   7 1440.41 82.2032  11
   2   4  -7 1349.62 76.1462  18
  -2   4   8 193.286 20.9765  34
   2   4  -8 197.553 30.5619  18
  -2   4   9 35.8826 15.6320  34
   2   4  -9 42.4084 20.6384  29
   2   4 -10 32.0923 19.7224  29
   2   4 -11 240.998 27.9643  29
   2   4 -12 286.701 29.8537  29
  -2  -4  13 56.5367 15.9044  22
   2   4 -13 65.1963 22.9260  29
  -2  -4  14-2.68039 12.9212  22
   2   4 -14 15.6196 20.4927  29
  -2  -4  15 263.758 19.8937  22
   2   4 -15 233.907 26.6240  29
   2   4 -16 12.6967 17.9172  29
   2   4 -17 34.4695 16.7842  29
  -2   5 -15-3.38135 13.9246  24
  -2   5 -15 8.98127 14.2022  27
  -2   5 -14 8.00083 14.6039  24
  -2   5 -14 4.79731 13.4149  29
  -2   5 -13-4.50631 16.6065  24
  -2   5 -13-21.8969 23.8208  37
  -2   5 -13 23.8895 15.2415  29
  -2   5 -12 153.654 29.7362  37
  -2   5 -12 199.322 24.3096  24
  -2   5 -12 176.024 21.8149  29
  -2   5 -11 117.597 21.4608  24
  -2   5 -11 111.695 29.9384  37
  -2   5 -11 107.700 21.0239  29
  -2   5 -10 397.146 31.0288  24
  -2   5 -10 440.728 31.7994  29
  -2   5 -10 451.803 41.4110  37
  -2   5  -9 255.534 37.4603  37
  -2   5  -9 269.279 27.6251  29
  -2   5  -9 260.996 26.2255  24
   2   5   8 83.1609 18.7263  25
  -2   5  -8 114.271 21.7942  29
  -2   5  -8 132.397 22.3162  24
   2   5   7 34.6732 16.0796  25
  -2   5  -7 67.0169 20.4700  29
   2   5   6 316.944 28.7640  25
  -2   5  -6 311.357 28.6696  29
  -2   5  -6 323.981 31.7309  27
   2   5   5 1445.34 67.4112  25
  -2   5  -5 1477.88 69.4198  27
  -2   5  -5 1498.44 66.8692  29
   2   5   4 2973.27 119.649  25
  -2   5  -4 3062.62 118.428  29
  -2   5  -4 2990.10 120.378  27
  -2   5  -3 839.637 44.4130  29
   2   5   3 833.552 46.9151  25
  -2   5  -3 748.165 46.4602  27
   2   5   2 960.790 53.7481  25
  -2   5  -2 1105.59 51.8933  29
  -2   5  -2 997.136 53.9989  27
  -2   5  -1 196.372 23.5549  29
   2   5   1 196.858 28.5791  25
  -2   5  -1 239.574 27.6490  27
   2   5   0 1214.94 62.7495  25
  -2   5   0 1226.42 58.0115  27
   2   5  -1 239.260 32.9020  25
  -2   5   1 253.415 26.5718  27
  -2   5   2 1445.36 62.0128  34
   2   5  -2 1163.30 67.7778  25
   2   5  -3 807.857 52.5869  25
  -2   5   3 865.737 45.1781  34
  -2   5   4 3363.47 125.929  34
   2   5  -4 3082.49 134.618  25
  -2   5   5 1372.58 61.1429  34
   2   5  -5 1342.21 71.8466  25
   2   5  -6 266.003 36.0532  25
   2   5  -7 33.4825 28.9239  25
   2   5  -8 57.6411 27.4158  25
   2   5  -9 223.430 34.6072  25
   2   5 -10 374.831 38.0104  25
   2   5 -11 99.2103 28.5549  25
  -2  -5  11 163.081 18.2869  22
   2   5 -11 122.166 21.2011  29
   2   5 -12 176.276 28.0208  25
  -2  -5  12 219.292 20.0764  22
   2   5 -12 241.128 24.5625  29
   2   5 -13 7.59425 20.2904  25
   2   5 -13 23.5430 16.7227  29
  -2  -5  13 5.76926 11.7644  22
   2   5 -14 43.5099 19.3648  25
  -2  -5  14 27.3517 10.8960  22
   2   5 -14 25.8379 15.1933  29
  -2  -5  15 0.77496 7.92120  22
   2   5 -15 18.4369 13.3489  29
  -2   6 -12 21.9254 11.7261  29
  -2   6 -11 27.9857 12.6400  29
  -2   6 -10 43.8257 14.3325  29
  -2   6  -9-2.67286 14.1726  29
   2   6   8 30.2179 14.4563  25
  -2   6  -8 31.5353 16.2837  29
   2   6   7 117.787 18.3002  25
  -2   6  -7 102.503 17.6362  29
   2   6   6 19.8959 15.2327  25
  -2   6  -6 4.67918 15.8565  29
   2   6   5 26.3073 16.4598  25
  -2   6  -5 17.4975 15.8307  29
  -2   6  -5 45.0340 18.5808  27
   2   6   4 116.167 20.4781  25
  -2   6  -4 191.490 23.4389  27
   2   6   3 44.3745 19.0150  25
  -2   6  -3 4.93829 18.6785  27
   2   6   2 544.873 35.5458  25
  -2   6  -2 495.028 33.2053  27
   2   6   1 114.845 23.2466  25
   2   6   0 226.928 26.8972  25
  -2   6   0 288.533 24.9205  34
   2   6  -1 42.3063 21.8106  25
  -2   6   1 63.1475 17.3002  34
   2   6  -2 589.539 40.8539  25
   2   6  -3 4.61065 22.6341  25
   2   6  -4 123.962 27.2617  25
   2   6  -5 47.6509 22.9878  25
   2   6  -6-2.19842 21.4553  25
   2   6  -7 122.061 25.7876  25
   2   6  -8 31.4511 21.3970  25
   2   6  -9-16.1529 19.1857  25
   2   6 -10 25.5149 18.2648  25
  -2  -6  10 29.4981 10.2642  22
   2   6 -11 16.4188 15.7208  25
  -2  -6  11 6.85045 8.94613  22
  -2  -6  12 1.47172 7.92221  22
  -2   7  -7-6.42074 8.70711  34
   2   7   6 316.488 20.2610  25
   2   7   5 156.339 16.3113  25
   2   7   4 955.169 42.7752  25
   2   7   3 336.159 22.8396  25
   2   7   2 122.856 16.9109  25
   2   7   1 136.316 17.5965  25
   2   7   0 24.3288 14.6816  25
   2   7  -1 121.905 17.3242  25
   2   7  -2 64.6051 15.7475  25
   2   7  -3 250.243 21.7160  25
   2   7  -4 887.046 41.6714  25
   2   7  -5 154.210 17.1781  25
   2   7  -6 323.415 22.3609  25
   2   7  -7 26.7541 11.5929  25
  -3   0 -20 84.4177 22.1779  39
   3   0  19-2.16322 12.1258  26
  -3   0 -19-18.9958 24.1636  39
   3   0  18 77.4081 16.7246  26
   3   0  17-6.14249 15.1229  26
   3   0  16 31.6894 18.0761  26
   3   0  15-1.72943 16.6221  26
   3   0  14 233.482 24.3561  26
   3   0  13 16.9130 19.3494  31
   3   0  13-3.31023 16.4430  26
   3   0  12 1545.46 65.4454  31
   3   0  12 1450.64 87.8629  19
   3   0  11-8.71445 26.4062  19
   3   0  11 20.6676 16.8649  31
   3   0  10 2239.00 94.4437  12
   3   0  10 2156.73 99.1060  14
   3   0  10 2145.94 85.9489  31
   3   0  10 2326.92 106.356  19
   3   0   9-13.5725 18.8461  14
   3   0   9 8.34832 19.1032  12
   3   0   9-10.1599 21.4636  19
   3   0   8 60.9355 20.7767  14
   3   0   8 34.3461 20.3910  12
   3   0   8 35.3199 21.5508  19
   3   0   7-6.53868 16.2602  14
   3   0   7 5.07669 17.7268  19
   3   0   6 3405.94 136.621  19
   3   0   6 3563.84 135.408  14
   3   0   5-3.74277 14.8008  19
   3   0   5-8.82306 15.3000  14
   3   0   4 17111.6 593.449  14
   3   0   4 17161.2 593.155  19
   3   0   3 47.1373 16.0160  14
   3   0   2 5049.08 175.741  14
  -3   0  -2 4497.47 181.072  20
   3   0   1 9.18792 14.8246  14
  -3   0  -1 30.2111 19.4619  20
   3   0   0 2.56037 13.3675  14
  -3   0   0 9.13617 18.6730  20
  -3   0   1 21.3072 17.4476  20
  -3   0   2 4834.10 179.187  20
  -3   0   3 14.5526 15.3004  13
  -3   0   3 59.8461 15.0910  10
  -3   0   4 16115.4 559.139  10
   3   0  -5 12.8776 17.0318  17
  -3   0   5 11.9399 14.6804  10
  -3   0   6 3512.07 133.932  10
   3   0  -6 3455.91 133.992  17
  -3   0   7 7.89696 15.1084  10
   3   0  -7 18.3257 19.1443  17
   3   0  -8 54.8533 21.4944  17
   3   0  -9 15.3906 20.9331  17
  -3   0  10 2047.70 80.7911  36
  -3   0  10 1977.89 81.4011  34
  -3   0  10 2097.93 81.5506  32
   3   0 -10 2075.94 93.8066  17
  -3   0  11 12.2957 13.7352  36
  -3   0  11 14.7722 13.9372  32
  -3   0  11 15.4887 15.0304  34
   3   0 -11-3.27421 24.5555  17
  -3   0  12 1396.57 60.1649  36
  -3   0  12 1392.71 62.1056  34
  -3   0  12 1378.70 60.7779  32
   3   0 -12 1364.36 77.3624  17
  -3   0  13 3.07963 14.7074  36
  -3   0  13-1.80237 16.9972  34
  -3   0  14 169.652 20.6865  36
  -3   0  14 194.813 24.1380  34
  -3   0  15-3.16524 15.7680  36
  -3   0  16 50.0927 16.2082  36
  -3   0  16 38.1319 17.1682  31
  -3   0  17 9.36834 15.4443  31
  -3   0  18 65.8604 15.1962  31
  -3   0  19-4.67959 11.4323  31
  -3   0  20 84.6574 11.5063  31
  -3   1 -20 12.7482 20.5310  39
  -3   1 -19 12.6119 23.1643  39
   3   1  18 306.518 23.6005  26
  -3   1 -18 337.375 35.2082  39
   3   1  17 85.6578 18.6160  26
   3   1  16 469.080 32.2093  26
   3   1  15 271.711 26.7881  26
   3   1  14 24.9247 18.9466  26
   3   1  13 256.904 26.1259  26
   3  -1  12 65.1047 24.4125  12
   3  -1  12 49.8731 19.1669  31
   3   1  12 45.7972 17.9105  26
   3  -1  12 51.3255 27.8841  19
   3  -1  11-12.8448 17.0280  31
   3  -1  11 13.7746 21.7892  12
   3   1  11 24.4598 17.1398  26
   3  -1  11 29.2432 23.2561  19
   3  -1  11 3.38666 21.1567  14
   3  -1  10 546.367 40.7922  14
   3  -1  10 592.648 40.5717  12
   3  -1  10 561.614 32.1907  31
   3  -1  10 505.985 44.0091  19
   3   1  10 479.496 31.9869  26
   3  -1   9 633.133 42.7924  14
   3  -1   9 617.146 41.5107  12
   3   1   9 579.313 46.2948  19
   3  -1   9 573.410 44.3034  19
   3   1   9 643.435 34.2957  26
   3  -1   8 1777.76 84.3946  14
   3  -1   8 2017.01 84.3231  12
   3   1   8 1789.43 89.5575  19
   3  -1   8 1933.79 88.6999  19
   3   1   7 670.253 45.9723  19
   3  -1   7 765.128 45.0017  19
   3   1   6 1697.01 79.3400  19
   3  -1   6 1806.25 78.2383  19
  -3  -1  -5 7.80133 20.8501  20
   3  -1   5 14.0283 13.6682  19
  -3  -1  -4 238.431 30.2362  20
  -3  -1  -3 1551.06 74.5158  20
  -3  -1  -2 3812.95 150.301  20
  -3  -1  -1 192.516 26.4713  20
   3   1   0 1.74975 19.1152  21
  -3  -1   0 2.20616 19.7022  20
  -3   1   0-5.11707 11.5880  10
   3   1  -1 228.977 26.5274  21
  -3  -1   1 187.242 26.9020  20
  -3   1   1 228.891 19.5143  10
  -3   1   2 4021.68 150.672  10
   3   1  -2 4072.20 146.598  17
  -3  -1   3 1747.26 77.5326  13
  -3   1   3 1839.30 73.5482  10
   3   1  -3 1698.14 70.0199  17
  -3  -1   4 217.207 24.4252  13
  -3   1   4 204.023 22.1379  10
   3   1  -4 238.518 21.2014  17
  -3  -1   5 32.3897 16.4850  13
   3   1  -5 41.1217 15.8672  17
  -3  -1   6 1554.09 69.7960  10
   3   1  -6 1697.76 70.7564  17
   3   1  -7 574.651 37.9228  17
   3  -1  -7 688.343 42.5856  17
   3   1  -8 1809.91 83.9328  17
   3  -1  -8 2052.25 88.4961  17
  -3  -1   9 611.944 32.3697  36
  -3   1   9 615.604 32.4546  34
  -3  -1   9 593.396 32.5797  32
  -3   1   9 488.980 40.8514  11
   3   1  -9 579.009 41.4975  17
   3  -1  -9 658.543 45.7961  17
  -3  -1  10 553.016 32.1731  36
  -3   1  10 583.428 32.9660  34
  -3  -1  10 591.817 32.7947  32
   3   1 -10 470.341 41.3903  17
   3  -1 -10 569.575 45.1814  17
  -3   1  11-3.22978 16.0431  34
  -3  -1  11 2.87849 13.5296  36
  -3  -1  11-11.0250 15.2787  32
   3   1 -11-6.74695 26.1845  17
  -3  -1  12 69.8651 17.2456  36
  -3   1  12 73.0079 18.6841  34
  -3  -1  12 116.157 18.9285  32
   3   1 -12 53.8102 28.8055  17
  -3   1  13 331.694 25.0946  36
  -3  -1  13 272.249 25.0832  36
  -3   1  13 350.136 27.7235  34
  -3  -1  13 305.443 26.0045  32
  -3   1  14 26.3621 15.3628  36
  -3  -1  14 39.8554 16.8197  36
  -3   1  14 45.3927 19.7847  34
  -3  -1  14 36.2374 16.3702  32
  -3  -1  15 206.940 22.2069  36
  -3   1  15 234.674 25.5573  34
  -3  -1  16 431.069 28.9345  36
  -3   1  16 431.645 31.9548  34
  -3  -1  16 406.423 29.0268  31
  -3   1  16 421.341 28.1407  31
  -3  -1  17 56.4949 15.8869  36
  -3   1  17 38.6134 15.0510  31
  -3  -1  17 37.4128 15.9171  31
  -3  -1  18 310.324 22.8832  31
  -3   1  18 332.084 22.4566  31
  -3  -1  19 20.9716 11.2776  31
  -3   1  19 3.33247 10.2213  31
  -3  -1  19 10.2400 10.3699  26
  -3   2 -19-6.44267 23.7855  37
  -3   2 -19 22.0178 19.5320  39
  -3   2 -18 182.126 31.1777  37
  -3   2 -18 170.725 26.1849  39
  -3   2 -17 63.2752 29.3778  37
  -3   2 -17 37.3143 24.5426  39
  -3   2 -16 482.929 39.5478  39
  -3   2 -15 47.2941 27.8473  39
   3   2  15 29.5905 17.9232  26
   3   2  14 30.4542 18.1840  26
   3   2  13 163.992 23.9957  26
   3   2  12 74.0100 21.0091  26
   3  -2  11 231.808 31.8291  14
   3  -2  11 276.061 33.1068  12
   3   2  11 285.017 44.4476  16
   3  -2  11 223.357 34.2594  19
   3   2  11 259.274 24.7775  26
   3  -2  10 1115.70 60.1522  12
   3  -2  10 994.067 63.5501  19
   3   2  10 1136.04 77.4537  16
   3   2  10 1013.66 50.7992  26
   3   2   9 519.629 50.8448  16
  -3   2  -9 521.538 33.4595  24
   3  -2   9 445.386 38.3114  12
   3  -2   9 509.493 42.6628  19
   3   2   9 517.891 32.2083  26
  -3   2  -8 1953.10 77.9647  24
   3  -2   8 1951.25 85.5229  12
   3   2   8 1968.76 98.5667  16
   3   2   8 1932.10 89.5180  21
   3  -2   8 1851.66 89.7426  19
   3   2   8 1728.75 75.0319  26
   3  -2   7 1070.49 55.6624  12
   3   2   7 976.185 58.6153  21
   3   2   6 55.9940 24.2536  21
  -3  -2  -6 74.9024 24.0943  20
   3   2   5 1737.49 80.8486  21
  -3  -2  -5 1701.53 83.2039  20
   3   2   4 2294.95 98.0678  21
  -3  -2  -4 2201.70 99.8812  20
   3   2   3 1091.00 57.2675  21
  -3  -2  -3 1015.62 58.9476  20
   3   2   2 628.442 41.3536  21
  -3  -2  -2 472.860 40.9823  20
   3   2   1 3292.64 131.661  21
  -3  -2  -1 3284.47 134.829  20
   3   2   0 72.5046 24.2209  21
  -3  -2   1 3230.88 132.464  13
   3   2  -1 3299.85 131.670  21
  -3  -2   2 439.830 35.5193  13
  -3  -2   3 948.163 53.5715  13
  -3  -2   4 2500.11 109.636  13
  -3   2   4 2665.30 108.628  11
  -3   2   5 1873.90 83.2257  11
   3   2  -5 1747.43 76.1289  17
  -3   2   6 61.1959 19.1662  11
   3   2  -6 94.2777 19.9814  17
  -3   2   7 1154.70 63.8682  11
   3   2  -7 1155.58 58.8160  17
  -3  -2   8 1830.08 72.9707  36
  -3   2   8 1745.41 72.8473  34
  -3  -2   8 1705.11 72.3690  32
  -3   2   8 1902.26 88.9350  11
   3   2  -8 1838.05 74.5460  28
   3   2  -8 1909.09 83.9758  17
  -3  -2   9 567.385 32.6032  36
  -3   2   9 552.529 32.8329  34
   3   2  -9 547.761 34.0065  33
  -3  -2   9 616.942 32.8223  32
  -3   2   9 620.604 46.7693  11
   3   2  -9 503.268 42.4679  17
  -3   2  10 1079.40 50.2835  34
  -3  -2  10 1050.88 49.4276  36
  -3  -2  10 1080.61 50.4009  32
  -3   2  10 1145.94 67.8050  11
   3   2 -10 1017.84 62.8405  17
  -3  -2  11 224.579 22.4747  36
  -3   2  11 232.103 24.1043  34
  -3  -2  11 253.302 23.8342  32
   3   2 -11 310.488 38.6612  17
  -3  -2  12 146.873 20.2631  36
  -3   2  12 129.656 20.3807  34
  -3  -2  12 147.511 20.8338  32
  -3  -2  13 141.662 20.3485  36
  -3   2  13 147.808 22.2270  34
  -3  -2  13 165.015 22.5042  32
  -3  -2  14 64.1311 17.3697  36
  -3   2  14 95.8643 19.8738  34
  -3  -2  15 29.7476 15.2052  36
  -3   2  15-5.32638 16.9100  34
  -3  -2  16 540.941 30.9765  36
  -3   2  16 537.544 32.8974  34
   3   2 -16 504.174 39.1472  29
  -3  -2  17 52.4268 14.5864  36
   3   2 -17 60.6847 23.4226  29
   3   2 -18 120.639 23.0297  29
  -3  -2  19 13.3145 9.81126  26
   3   2 -19-1.45153 17.7660  29
  -3   3 -18 7.74637 23.2830  37
   3   3  18 32.0362 11.2385  23
  -3   3 -17 116.166 28.1225  37
  -3   3 -16 14.9383 27.5798  37
  -3   3 -15 60.6577 30.9303  37
  -3   3 -14 182.504 35.0073  37
  -3   3 -14 101.921 23.0000  24
  -3   3 -13 35.4894 29.8794  37
  -3   3 -13 14.5276 20.7490  24
  -3   3 -12 122.213 34.0112  37
  -3   3 -12 87.6945 23.7479  24
  -3   3 -11 95.4685 34.3373  37
  -3   3 -11 59.6440 22.9144  24
  -3   3 -10 46.5187 31.5533  37
  -3   3 -10 33.8779 21.0095  24
  -3   3  -9 149.188 34.7975  37
  -3   3  -9 61.1256 22.1393  24
   3  -3   9 116.700 26.0711  19
  -3   3  -8 38.7985 31.1223  37
  -3   3  -8 7.27846 19.3039  24
  -3   3  -7 24.1729 28.6399  37
  -3   3  -7 1.72886 18.5222  24
  -3   3  -6 48.7329 29.2173  37
  -3   3  -6 57.4945 19.1693  24
   3   3   6 44.9081 24.6130  21
  -3   3  -6 63.9367 18.0535  29
  -3   3  -5 45.0069 28.2558  37
  -3   3  -5 34.4578 17.9074  24
   3   3   5 37.2966 24.4899  21
  -3   3  -5 22.5387 16.8777  29
  -3   3  -4 960.743 54.8999  37
  -3   3  -4 970.279 46.9635  24
   3   3   4 1010.45 47.0479  23
   3   3   4 1002.03 59.1186  21
   3   3   3 468.922 39.2392  21
   3   3   2 1065.74 60.2462  21
  -3  -3  -1 9.04343 21.1774  13
  -3  -3   0 3.04053 19.4067  13
  -3  -3   1 39.9815 21.6461  13
  -3  -3   2 1102.35 61.0681  13
  -3  -3   3 564.362 41.9931  13
  -3   3   3 521.554 39.4455  11
  -3   3   4 1098.58 49.4191  34
   3   3  -4 1057.26 47.6967  28
  -3   3   4 1158.80 48.5522  35
  -3   3   5 74.1172 16.4745  35
   3   3  -5 55.8872 16.3903  33
  -3   3   5 79.7098 15.3880  34
  -3   3   5 51.7697 21.4990  11
   3   3  -5 54.2421 15.4040  28
   3   3  -5 31.2930 22.9527  18
  -3   3   6 55.3688 16.0046  35
  -3  -3   6 51.7561 16.4511  36
   3   3  -6 34.5314 15.8854  33
  -3   3   6 48.4352 23.1469  11
  -3   3   6 33.7398 15.8605  34
   3   3  -6 44.1509 16.9494  28
   3   3  -6 33.6433 23.2630  18
   3   3  -7-15.1156 15.2662  33
  -3   3   7-9.10035 14.0709  34
  -3  -3   7 18.2149 16.3009  36
  -3   3   7 12.0273 21.6869  11
   3   3  -7 13.7895 17.0964  28
   3   3  -7-18.0379 22.2001  18
  -3  -3   8 12.3761 15.9888  36
   3   3  -8 25.1441 16.2756  33
  -3   3   8 12.8926 22.3222  11
  -3   3   8 7.94226 14.5465  34
  -3   3   9 79.3080 18.1669  34
   3   3  -9 55.5059 18.2382  33
  -3   3   9 63.8971 26.7227  11
  -3  -3  10 14.3581 16.1923  36
  -3   3  10 20.6876 16.3345  34
   3   3 -10 22.2648 18.6732  33
  -3  -3  10 47.2036 16.3226  32
  -3  -3  11 94.4896 17.3117  36
   3   3 -11 31.5990 18.4790  33
  -3   3  11 75.9484 17.9994  34
  -3  -3  12 97.7494 18.0410  36
  -3   3  12 75.1969 18.9292  34
   3   3 -12 91.5684 23.7801  29
  -3   3  13-1.75789 15.8138  34
  -3  -3  13 16.7270 14.9322  36
   3   3 -13 10.6476 21.0335  29
  -3  -3  14 122.213 17.8266  36
  -3   3  14 140.376 20.5474  34
   3   3 -14 142.138 26.1467  29
  -3   3  15 21.4782 14.5646  34
  -3  -3  15-1.28195 13.2118  36
   3   3 -15 16.3055 20.7159  29
  -3   3  16 1.33833 12.9051  34
   3   3 -16 22.6126 21.1726  29
  -3   3  17 75.6605 13.8334  34
   3   3 -17 88.0084 21.2911  29
  -3  -3  18 11.6929 9.85685  26
   3   3 -18 29.7963 17.1754  29
  -3   4 -16 18.8644 22.5709  37
  -3   4 -15 68.8100 26.5315  37
  -3   4 -14-31.5650 27.4709  37
  -3   4 -14 25.3608 18.8232  24
  -3   4 -13 665.333 47.1027  37
  -3   4 -13 683.301 40.6551  24
  -3   4 -12 139.700 33.0167  37
  -3   4 -12 160.162 24.7970  24
   3   4  12 124.290 19.4019  23
  -3   4 -11-5.10076 30.3062  37
  -3   4 -11 14.0871 21.4046  24
   3   4  11 28.6424 16.9098  23
  -3   4 -10-15.6289 29.9899  37
  -3   4 -10 14.2233 19.6527  24
   3   4  10 23.1161 18.0114  23
  -3   4 -10 1.85611 17.7870  29
  -3   4  -9 665.836 50.9078  37
  -3   4  -9 637.920 41.4306  24
   3   4   9 708.674 38.3887  23
  -3   4  -9 678.004 40.9089  29
  -3   4  -8 388.687 41.5389  37
  -3   4  -8 390.393 31.9383  24
   3   4   8 476.382 30.9446  23
  -3   4  -8 423.910 32.0215  29
  -3   4  -7 5.14667 32.2910  37
  -3   4  -7 28.9337 21.3125  24
   3   4   7 60.6076 19.2053  23
  -3   4  -7 35.4519 19.7275  29
  -3   4  -6 25.2326 31.5719  37
  -3   4  -6 57.8973 20.9631  24
   3   4   6 59.0929 18.9303  23
  -3   4  -6 51.3916 20.9296  29
  -3   4  -5 952.652 50.4745  24
  -3   4  -5 1042.48 52.3230  29
  -3   4  -4 455.276 32.3973  24
  -3   4  -4 500.540 34.1653  29
  -3   4  -3 230.127 25.0215  29
  -3   4  -3 189.220 26.7159  27
  -3   4  -2 43.2354 18.6273  29
  -3   4  -2 14.1050 21.8884  27
  -3   4  -1 220.830 23.5024  29
  -3   4  -1 160.455 25.3523  27
  -3   4   0-29.7596 20.1017  27
   3   4  -1 139.494 29.1966  25
   3   4  -1 134.278 25.8432  18
  -3   4   1 136.624 22.2631  27
   3   4  -2 29.3368 26.2118  25
   3   4  -2 22.2864 22.6497  18
  -3   4   2 42.3341 19.6184  27
  -3   4   3 191.306 20.7780  35
   3   4  -3 194.046 30.8309  25
  -3   4   3 234.919 22.6127  34
   3   4  -3 206.245 29.1393  18
  -3   4   4 557.617 34.2273  34
   3   4  -4 577.031 33.3688  33
  -3  -4   5 813.272 43.2680  36
  -3   4   5 867.649 43.6461  34
   3   4  -5 870.547 43.7951  33
  -3   4   5 722.139 56.1779  11
   3   4  -5 826.121 55.3464  18
  -3   4   6 91.7808 18.4132  34
   3   4  -6 84.5246 17.9811  33
   3   4  -6 59.9689 23.5721  18
  -3   4   7 30.7355 17.0927  34
  -3   4   8 450.960 30.7357  34
  -3   4   9 723.377 39.3026  34
  -3   4  10-1.72037 14.9152  34
  -3   4  11 5.02184 15.7447  34
   3   4 -11 34.6149 20.2440  29
  -3   4  12 211.633 21.7418  34
   3   4 -12 151.484 24.2989  29
  -3   4  13 580.327 33.4469  34
   3   4 -13 620.121 38.4665  29
  -3   4  14 2.64571 12.2317  34
  -3  -4  14 2.34189 11.2196  22
   3   4 -14-23.6116 18.4248  29
  -3   4  15 68.3480 13.4828  34
   3   4 -15 67.8481 19.4175  29
   3   4 -16 35.8709 16.0207  29
  -3   5 -14 45.6576 14.7856  27
  -3   5 -13 59.6338 17.3672  27
  -3   5 -12 43.6679 14.9410  29
  -3   5 -12 32.7491 18.0641  27
  -3   5 -11-2.89584 14.7964  29
  -3   5 -10 15.0776 17.7467  24
  -3   5 -10 41.1063 17.0901  29
  -3   5  -9 230.112 24.6231  24
  -3   5  -9 289.759 25.4835  29
  -3   5  -9 257.724 28.3861  27
  -3   5  -8 135.442 22.4167  24
  -3   5  -8 193.620 23.1790  29
  -3   5  -8 200.316 26.5373  27
  -3   5  -7 126.714 21.8239  29
  -3   5  -7 89.1472 24.0939  27
  -3   5  -6 737.082 41.8075  29
  -3   5  -6 704.446 43.3867  27
  -3   5  -5 114.510 21.7357  29
  -3   5  -5 178.880 26.8862  27
  -3   5  -4 23.9384 18.7887  29
  -3   5  -4 33.1785 22.6818  27
  -3   5  -3 1110.00 56.3669  27
   3   5   2 1121.20 56.5672  25
  -3   5  -2 1047.89 54.9574  27
   3   5   1 199.375 28.5921  25
  -3   5  -1 177.167 25.7556  27
   3   5   0 9.54784 24.3950  25
  -3   5   0 12.5973 20.8113  27
   3   5  -1 200.438 31.4671  25
  -3   5   1 195.850 23.9555  34
  -3   5   1 187.521 25.3392  27
   3   5  -2 1321.11 68.4396  25
  -3   5   2 1268.63 60.2478  34
   3   5  -3 901.243 57.9943  25
  -3   5   3 1013.82 49.5374  34
   3   5  -4 63.5924 29.4915  25
  -3   5   4 23.3005 17.2104  34
   3   5  -5 78.3661 30.7195  25
  -3   5   5 119.474 19.2185  34
  -3   5   6 788.511 40.6774  34
   3   5  -6 689.820 51.0101  25
   3   5  -7 148.281 32.4335  25
  -3   5   7 117.755 19.1505  34
   3   5  -8 146.184 32.1438  25
  -3   5   8 216.805 20.9602  34
  -3   5   9 243.885 21.7104  34
   3   5  -9 275.615 33.6591  25
   3   5 -10 28.3153 25.0646  25
  -3   5  10 47.2758 13.9721  34
   3   5 -11 25.8529 23.1408  25
  -3   5  11 10.4387 11.9923  34
   3   5 -12 28.7664 21.4595  25
  -3  -5  12 18.0328 12.3026  22
   3   5 -13 52.9386 19.9131  25
  -3  -5  13 43.5019 11.2123  22
   3   5 -14 39.6113 17.2033  25
  -3  -5  14 63.2717 10.4112  22
  -3   6 -11 1.63659 10.8251  27
  -3   6 -10 18.5437 12.7773  27
  -3   6  -9 15.6050 13.8320  27
  -3   6  -8 109.871 18.1747  27
  -3   6  -7 48.0449 17.4386  27
  -3   6  -6-8.48723 17.0116  27
  -3   6  -5 30.9418 17.6070  27
   3   6   4 30.6619 16.0576  25
  -3   6  -4 22.6850 17.3971  27
   3   6   3-13.7287 16.9073  25
  -3   6  -3-18.3982 18.2230  27
   3   6   2 21.7444 17.0489  25
   3   6   1 13.3092 18.2177  25
  -3   6  -1-1.68279 15.1365  34
   3   6   0 11.8953 19.2902  25
  -3   6   0-4.97283 14.5887  34
   3   6  -1 38.9845 21.0496  25
  -3   6   1 25.9215 14.8633  34
  -3   6   2 14.1677 14.9450  34
   3   6  -2 4.20156 19.4924  25
  -3   6   3 6.07260 13.4127  34
   3   6  -3 8.44494 20.0393  25
   3   6  -4 14.7464 21.3652  25
  -3   6   4 29.0487 13.8974  34
   3   6  -5-10.2838 21.5437  25
  -3   6   5 36.0375 13.3005  34
   3   6  -6-1.98397 20.8779  25
  -3   6   6-3.90180 11.7815  34
   3   6  -7 69.0850 23.1847  25
   3   6  -8 94.5658 21.1619  25
   3   6  -9 12.3527 18.0844  25
  -3  -6   9 8.70454 8.70313  22
   3   6 -10 10.7609 15.3642  25
  -3  -6  10 21.3022 8.84643  22
   3   6 -11-11.2483 13.7388  25
  -3  -6  11 1.36556 7.53064  22
  -3   7  -5 7.02994 8.18043  34
  -3   7  -4 54.4469 10.4143  34
   3   7   3 12.1908 10.3307  25
  -3   7  -3 17.5825 9.40776  34
   3   7   2 26.0574 11.2764  25
  -3   7  -2 12.6045 9.22030  34
   3   7   1 24.1794 11.2157  25
  -3   7  -1 8.16999 8.97859  34
   3   7   0 4.33649 11.9864  25
  -3   7   0 6.29540 8.96207  34
   3   7  -1 25.2744 12.8157  25
   3   7  -2 2.18774 11.8056  25
   3   7  -3 20.1715 12.2678  25
   3   7  -4 54.7621 12.5472  25
   3   7  -5 2.81460 10.7781  25
  -4   0 -19 40.2935 19.8206  39
  -4   0 -18 31.7171 23.2196  39
  -4   0 -17 47.1628 26.0858  39
  -4   0 -16 841.419 51.3791  39
  -4   0 -15-19.1208 27.3447  39
  -4   0 -14 4845.38 185.877  39
  -4   0 -13 48.3857 30.2117  39
  -4   0 -12 126.658 31.1197  39
   4   0  11-4.04046 23.9036  14
   4   0  11 4.95710 26.5510  19
   4   0  10 585.984 46.9793  14
   4   0  10 627.293 52.4292  19
  -4   0 -10 532.541 42.3213  39
   4   0   9 6.87117 21.3059  14
  -4   0  -9 21.8452 24.9497  39
   4   0   8 28.3014 19.9753  14
   4   0   8 57.5927 22.1553  12
  -4   0  -8 37.2955 23.6752  39
   4   0   7-2.87387 18.2284  14
  -4   0  -7 64.9218 24.6624  39
   4   0   6 4837.45 186.510  14
   4   0   5 70.2687 23.4093  14
   4   0   4 8423.36 313.627  14
  -4   0  -4 9023.93 321.521  20
   4   0   3 12.6677 16.3154  14
  -4   0  -3 14.7667 23.4670  20
   4   0   2 605.012 37.4728  14
  -4   0  -2 520.258 41.1568  20
  -4   0  -1-10.8789 20.9111  20
  -4   0   0 286.990 31.8248  20
  -4   0   1 12.8594 14.6009  10
  -4   0   2 559.315 34.1653  10
  -4   0   3 26.6215 16.3672  10
  -4   0   4 9559.97 337.798  10
   4   0  -4 9308.67 335.871  17
   4   0  -5 41.8379 21.3760  17
  -4   0   5 50.7940 20.0785  10
  -4   0   6 4928.27 188.857  10
   4   0  -6 5007.41 188.236  17
  -4   0   7 26.2516 15.1061  32
  -4   0   7 2.59357 16.2115  10
   4   0  -7 28.2924 22.3069  17
  -4   0   8 17.4726 14.4929  32
   4   0  -8 51.1482 23.0997  17
  -4   0   9-1.53392 14.2319  32
   4   0  -9-15.6660 23.2546  17
  -4   0  10 585.039 34.0445  32
   4   0 -10 593.314 47.2447  17
  -4   0  11 14.9423 16.6840  32
   4   0 -11-26.8084 26.2692  17
  -4   0  12 165.126 20.0750  36
  -4   0  12 180.820 21.9727  32
  -4   0  13 43.3942 16.2732  36
  -4   0  13 40.2619 18.4127  34
  -4   0  13 24.9759 15.8491  32
  -4   0  14 5225.13 190.205  36
  -4   0  14 5257.76 191.302  32
  -4   0  15 1.40702 14.2592  36
  -4   0  16 861.066 40.9049  36
  -4   0  17-24.5438 13.8332  31
  -4   0  18 28.2171 12.0196  31
  -4   0  19-10.9019 8.94703  31
  -4   1 -19-7.95226 19.1031  39
  -4   1 -18 16.9399 22.8170  39
  -4   1 -17 132.919 28.5095  39
  -4   1 -16 264.543 33.6322  39
  -4   1 -15 332.537 38.2126  39
  -4   1 -14 34.0975 29.9406  39
   4   1  13 3.47999 17.6337  26
  -4   1 -13-2.44503 29.5168  39
   4   1  12 248.943 25.7030  26
  -4   1 -12 287.851 37.3042  39
   4   1  11 5.05521 16.9900  26
  -4   1 -11 48.5940 28.8597  39
   4  -1  10 141.303 29.2250  14
   4  -1  10 174.094 29.2596  12
  -4  -1 -10 131.241 35.0398  20
   4  -1  10 208.053 32.7815  19
   4   1  10 141.244 21.6236  26
  -4   1 -10 181.012 31.5656  39
   4  -1   9 20.5079 21.3586  14
   4  -1   9 40.0571 22.8422  12
  -4  -1  -9-4.67426 28.3317  20
   4  -1   9-7.96367 22.3767  19
  -4   1  -9 50.2175 29.0156  39
   4  -1   8 1564.40 76.0690  14
  -4  -1  -8 1280.88 80.8606  20
   4  -1   8 1426.20 77.0025  19
  -4   1  -8 1346.02 68.8464  39
   4  -1   7 119.416 23.7768  14
  -4  -1  -7 124.663 30.7551  20
  -4   1  -7 134.720 27.9885  39
   4  -1   6 2614.40 108.483  14
  -4  -1  -6 2605.34 118.222  20
  -4   1  -6 2499.38 102.962  39
   4  -1   5 246.617 27.0658  14
  -4  -1  -5 255.430 36.1384  20
   4  -1   4 908.100 49.2135  14
  -4  -1  -4 901.728 58.1147  20
  -4  -1  -3 1343.32 72.5760  20
  -4  -1  -2 668.988 48.4237  20
   4   1   1 1251.59 61.6294  21
  -4  -1  -1 1108.60 64.6954  20
  -4  -1   0 277.584 32.3634  20
  -4   1   0 260.993 23.8983  10
  -4  -1   1 1135.51 63.6701  20
  -4   1   1 1170.44 55.0740  10
  -4  -1   2 736.298 48.5168  13
  -4   1   2 817.277 43.6834  10
  -4  -1   3 1298.04 66.6486  13
  -4   1   3 1311.18 61.7060  10
  -4  -1   4 911.299 52.8290  13
  -4   1   4 911.540 49.1544  10
  -4  -1   5 249.155 27.8894  13
  -4  -1   5 219.787 25.1196  10
   4   1  -5 237.703 24.6451  17
  -4  -1   6 2694.33 110.209  10
   4   1  -6 2621.36 108.565  17
  -4  -1   7 110.291 16.7618  36
  -4  -1   7 111.260 17.0964  32
  -4   1   7 121.148 17.3750  32
   4   1  -7 117.356 23.5955  17
   4  -1  -7 109.273 26.6546  17
  -4  -1   8 1490.15 62.2828  36
  -4  -1   8 1423.20 62.9256  32
  -4   1   8 1478.75 62.6019  32
   4   1  -8 1450.38 72.6642  17
   4  -1  -8 1611.34 78.7029  17
  -4  -1   9 1.41300 13.5030  36
  -4  -1   9 33.1487 15.7326  32
  -4   1   9 17.8910 13.6058  32
   4   1  -9-3.04130 22.5757  17
   4  -1  -9 3.51654 24.1245  17
  -4  -1  10 181.493 20.6252  36
  -4   1  10 144.158 19.8903  34
  -4  -1  10 221.091 22.2001  32
   4   1 -10 194.584 31.3399  17
   4  -1 -10 235.647 35.8143  17
  -4  -1  11 24.4282 16.1692  36
  -4   1  11 17.0030 15.4223  34
  -4  -1  11 31.1169 16.9409  32
  -4  -1  12 263.358 23.2792  36
  -4   1  12 209.361 24.0577  34
  -4  -1  12 235.796 24.0303  32
  -4  -1  13 13.9853 15.5294  36
  -4   1  13 57.7895 18.5449  34
  -4  -1  13 43.6519 16.7216  32
  -4  -1  14 25.6464 14.4613  36
  -4   1  14 35.5998 18.1808  34
  -4  -1  14 52.0162 17.2841  32
  -4  -1  15 320.371 24.2669  36
  -4   1  15 292.438 26.0540  34
  -4  -1  15 322.739 25.2556  32
  -4  -1  16 246.184 20.8277  36
  -4  -1  16 284.445 21.9619  31
  -4   1  16 230.187 20.5067  31
  -4  -1  17 111.597 14.7054  36
  -4  -1  17 83.4731 14.9540  31
  -4   1  17 89.8461 14.6376  31
  -4  -1  18 31.2496 11.4756  31
  -4   1  18 34.0899 10.7722  31
   4   1 -18 23.4116 19.3643  29
  -4   2 -18 3.91507 17.8213  39
  -4   2 -17 103.798 22.8894  39
  -4   2 -16 340.833 32.3433  39
  -4   2 -15-4.15966 25.5007  39
  -4   2 -14 11.1056 25.5182  39
  -4   2 -13 68.8621 28.5058  39
  -4   2 -12 247.519 33.3742  39
  -4   2 -11 118.847 29.9044  39
  -4   2 -10 3730.14 147.190  39
   4  -2   9 255.386 32.6792  14
  -4   2  -9 265.568 26.8157  24
   4  -2   9 273.448 34.1086  12
   4   2   9 280.000 37.3772  21
   4  -2   9 266.717 34.9960  19
  -4   2  -9 197.482 33.1791  39
   4  -2   8 1725.65 87.5243  14
  -4   2  -8 1877.50 77.9030  24
   4  -2   8 1976.38 88.3872  12
   4   2   8 1860.54 92.7217  21
   4  -2   8 1825.91 91.3194  19
  -4   2  -8 1604.03 79.8016  39
   4  -2   7 293.962 32.4332  14
  -4   2  -7 303.595 26.9232  24
   4   2   7 261.528 35.4885  21
  -4  -2  -7 192.352 36.5947  20
   4  -2   7 313.022 33.6035  19
  -4   2  -7 210.276 30.6022  39
   4  -2   6 584.050 42.7040  14
   4   2   6 634.871 50.0118  21
  -4  -2  -6 550.874 51.3696  20
   4  -2   6 743.417 48.1681  19
  -4   2  -6 632.474 41.1415  39
  -4   2  -5 672.688 38.2523  35
  -4   2  -5 809.920 44.8340  39
   4   2   5 818.929 53.3876  21
  -4  -2  -5 735.397 56.0859  20
   4   2   4 55.1652 20.0234  23
   4   2   4 50.0074 23.7401  21
  -4  -2  -4 49.0862 27.6382  20
   4   2   3 383.347 39.3237  21
  -4  -2  -3 352.067 40.8335  20
   4   2   2 5924.62 226.369  21
  -4  -2  -2 5837.54 229.982  20
   4   2   1 6064.34 228.147  21
  -4  -2  -1 5844.69 231.159  20
   4   2   0 45410.1 1561.05  21
  -4  -2   1 6036.35 233.468  13
  -4  -2   2 5896.29 228.478  13
  -4  -2   3 289.579 35.9542  13
  -4   2   4 65.6747 16.3911  35
  -4  -2   4 94.6776 25.7119  13
   4   2  -4 57.5594 16.1058  28
  -4   2   5 781.540 37.7740  35
  -4  -2   5 833.488 53.3106  13
   4   2  -5 732.892 38.4949  28
  -4  -2   6 678.423 37.0560  36
  -4   2   6 773.184 37.2454  35
  -4   2   6 694.098 36.2597  34
  -4   2   6 660.758 48.5177  11
   4   2  -6 724.812 38.6215  28
  -4  -2   7 218.066 21.8381  36
  -4   2   7 249.215 21.7375  34
  -4   2   7 164.617 29.6412  11
   4   2  -7 213.996 25.2862  28
  -4  -2   8 1864.93 77.0339  36
  -4   2   8 1847.42 76.6615  34
  -4  -2   8 1788.96 76.0402  32
  -4   2   8 1813.63 93.9043  11
   4   2  -8 1863.52 79.2868  28
   4   2  -8 2062.61 89.8182  17
   4  -2  -8 1877.50 94.2175  17
  -4  -2   9 264.356 23.5913  36
  -4   2   9 290.893 24.5063  34
   4   2  -9 252.424 27.0246  33
  -4  -2   9 241.711 23.3518  32
  -4   2   9 281.067 36.4451  11
   4   2  -9 283.614 33.6506  17
   4  -2  -9 202.390 36.7675  17
  -4  -2  10 4350.32 156.618  36
  -4   2  10 4109.03 157.011  34
  -4  -2  10 4192.46 156.807  32
   4   2 -10 4136.18 160.151  33
  -4  -2  11 77.5733 19.0790  36
   4   2 -11 68.8543 23.0361  33
  -4  -2  11 84.6241 19.5918  32
  -4   2  11 87.0124 19.6338  34
  -4  -2  12 217.834 23.1636  36
  -4   2  12 196.533 22.7576  34
  -4  -2  12 200.579 22.3199  32
  -4  -2  13 74.4935 17.3906  36
  -4   2  13 57.0785 18.8145  34
  -4  -2  13 71.8772 18.2482  32
  -4  -2  14 51.1582 15.8754  36
  -4   2  14 54.9088 17.5772  34
  -4  -2  15 26.5952 14.4105  36
  -4   2  15 22.1175 15.9423  34
  -4  -2  16 292.183 21.7391  36
  -4   2  16 345.125 24.2504  34
   4   2 -16 349.157 30.8664  29
  -4  -2  17 146.535 14.8854  36
   4   2 -17 84.2998 21.4950  29
  -4  -2  18 17.6652 9.21624  26
   4   2 -18 45.9605 16.8660  29
   4   3  17-8.16196 10.1626  23
  -4   3 -16 104.977 26.2053  37
   4   3  16 97.3403 15.3966  23
  -4   3 -15-15.5073 24.9619  37
   4   3  15 13.4672 14.3382  23
   4  -3  14 96.4981 15.6838  38
  -4   3 -14 51.8255 28.6681  37
  -4   3 -13 79.0651 31.2281  37
  -4   3 -12 302.251 38.4460  37
  -4   3 -11 97.4637 31.9586  37
  -4   3 -10 70.4930 32.5196  37
  -4   3 -10 78.0315 22.8439  24
  -4   3  -9 17.5194 30.8739  37
  -4   3  -9 30.5338 21.1602  24
  -4   3  -8 7.38752 30.1620  37
  -4   3  -8 55.8830 22.8135  24
  -4   3  -7 645.517 50.6045  37
   4   3   7 690.310 54.0498  21
   4   3   7 705.328 39.9631  23
   4   3   6 93.7278 21.5286  23
   4   3   6 46.7157 27.4646  21
   4   3   5 90.8952 20.7387  23
   4   3   5 56.7996 25.9467  21
   4   3   4 264.833 27.1461  23
   4   3   4 308.526 36.2284  21
   4   3   3 55.4905 21.9721  23
   4   3   3 68.8207 28.0548  21
  -4   3  -2 37.2545 18.6237  35
  -4  -3  -2 46.1572 23.8811  13
   4   3   2 36.3941 22.0409  23
   4   3   2 25.2427 26.6527  21
  -4   3  -1 118.235 19.3128  35
  -4  -3  -1 115.094 27.9380  13
   4   3   1 71.8674 22.9955  23
  -4   3   0 1641.44 66.8885  35
  -4  -3   0 1584.41 82.6121  13
   4   3   0 1452.23 69.7868  23
  -4   3   1 83.0021 18.8050  35
  -4  -3   1 84.8916 26.1578  13
  -4   3   1 99.4164 17.9889  34
  -4   3   2 49.2821 18.1135  35
  -4  -3   2 77.6307 27.3140  13
  -4   3   2 30.8203 15.2161  34
   4   3  -2 55.8370 15.8513  28
  -4   3   3 123.975 19.3076  35
  -4  -3   3 70.4543 24.9081  13
  -4   3   3 100.122 18.6025  34
   4   3  -3 128.740 18.2332  28
  -4   3   4 298.194 25.2784  35
  -4   3   4 318.096 25.6704  34
  -4   3   4 244.440 32.7687  11
   4   3  -4 318.272 25.3423  28
  -4  -3   5 106.697 19.2471  36
  -4   3   5 63.4438 17.4555  35
  -4   3   5 87.1320 17.9189  34
   4   3  -5 118.411 19.4796  33
  -4   3   5 129.450 28.4280  11
   4   3  -5 86.5689 17.6550  28
  -4  -3   6 59.0849 17.0048  36
  -4   3   6 63.7060 16.6769  35
  -4   3   6 64.7074 16.2648  34
   4   3  -6 103.326 19.3422  33
  -4   3   6 116.063 27.1630  11
   4   3  -6 70.5849 19.1446  28
  -4  -3   7 721.492 39.1549  36
  -4   3   7 730.187 38.8619  34
   4   3  -7 799.117 41.5757  33
   4   3  -7 601.109 52.1054  18
   4   3  -7 607.685 38.5044  28
  -4  -3   8 78.2567 18.8947  36
  -4   3   8 53.0966 17.9755  34
   4   3  -8 43.3282 18.2395  33
   4   3  -8 40.1476 19.8268  28
  -4  -3   9 5.08760 16.9451  36
  -4   3   9 3.49463 15.3216  34
   4   3  -9 2.05247 18.3300  33
  -4  -3  10 39.9299 17.9141  36
  -4   3  10 35.5827 17.4117  34
   4   3 -10 40.1692 19.5909  33
  -4  -3  11 74.3669 17.7852  36
   4   3 -11 94.1790 21.1632  33
  -4  -3  11 111.525 18.3859  32
  -4   3  11 76.1234 17.6348  34
  -4  -3  12 277.849 24.1751  36
  -4   3  12 230.746 23.8138  34
   4   3 -12 252.942 27.4346  33
   4   3 -12 242.429 26.9131  29
  -4  -3  13 47.0041 15.6247  36
  -4   3  13 81.9728 17.9344  34
   4   3 -13 94.0368 21.5445  29
  -4  -3  14 83.0953 15.1366  36
  -4   3  14 87.0355 17.1277  34
   4   3 -14 75.6148 21.1796  29
  -4  -3  15 23.2195 12.2734  36
  -4   3  15 27.7253 13.6582  34
   4   3 -15 6.63389 18.0451  29
  -4  -3  16 117.695 13.7324  36
  -4   3  16 87.0520 13.8754  34
   4   3 -16 88.8566 19.2494  29
  -4  -3  17 8.37687 8.87177  36
   4   3 -17 19.2668 15.1581  29
   4  -4  15 269.518 17.6094  38
   4   4  15 251.289 18.0094  23
  -4   4 -14 476.484 35.9446  37
   4  -4  14 486.519 26.5559  38
   4   4  14 480.843 26.6968  23
  -4   4 -13 216.755 29.6210  37
   4   4  13 139.134 18.2343  23
  -4   4 -12-14.7377 27.2831  37
   4   4  12 62.1263 16.2907  23
  -4   4 -11 31.7752 26.3038  37
   4   4  11 92.7874 17.9730  23
  -4   4 -10 38.2858 29.3573  37
   4   4  10 28.6589 17.8051  23
  -4   4  -9-2.47631 30.6667  37
   4   4   9 43.9189 18.3192  23
  -4   4  -8 2.52362 30.7045  37
   4   4   8 1.61476 17.8930  23
   4   4   7 29.7137 18.9815  23
  -4   4  -7 19.5856 18.6577  29
   4   4   6 1387.20 63.5304  23
  -4   4  -6 1442.45 64.6690  29
   4   4   5 228.699 26.1378  23
  -4   4  -5 195.371 28.5344  27
   4   4   4 3691.41 140.727  23
  -4   4  -4 3668.24 142.924  27
   4   4   3 974.708 52.7455  23
  -4   4  -3 1053.29 54.6809  27
   4   4   2 263.874 30.5821  23
  -4   4  -2 364.756 31.6640  27
  -4   4  -1 28.3650 21.0409  27
  -4   4   0 32.7097 20.6894  27
  -4   4   1 64.0944 18.3782  35
  -4   4   1 84.6104 19.5508  34
  -4   4   1 18.4044 20.3293  27
  -4   4   2 387.812 28.2414  35
  -4   4   2 375.571 29.7067  34
  -4   4   3 1297.14 57.5228  35
  -4   4   3 1193.10 57.9718  34
   4   4  -3 1247.89 56.0177  28
  -4   4   4 4015.80 149.994  35
  -4   4   4 4068.21 152.447  34
   4   4  -4 4013.48 152.151  33
  -4  -4   5 238.974 25.2624  36
  -4   4   5 224.003 24.0138  34
   4   4  -5 245.675 25.2302  33
  -4  -4   6 1430.19 64.6093  36
  -4   4   6 1458.32 64.6694  34
   4   4  -6 1480.50 66.0921  33
  -4  -4   7 52.5788 17.0866  36
  -4   4   7 57.9387 16.6980  34
   4   4  -7 39.2630 18.2316  33
  -4  -4   8 10.1434 16.1477  36
  -4   4   8 3.49305 15.3148  34
   4   4  -8-1.98319 16.7958  33
  -4  -4   9 29.0954 16.1982  36
  -4   4   9-11.9566 15.8999  34
  -4  -4  10 34.9416 15.5484  36
  -4   4  10 16.4580 15.1393  34
  -4  -4  11 89.5508 16.1129  36
  -4   4  11 53.3640 15.5951  34
  -4  -4  12 36.4341 14.0567  36
  -4   4  12 24.5802 14.1063  34
  -4  -4  13 132.186 15.2624  36
  -4   4  13 132.468 16.7710  34
  -4   4  14 415.570 24.6649  34
  -4  -4  14 433.895 23.5104  22
  -4   4  15 217.860 16.5453  34
   4   4 -15 240.913 19.3164  29
   4  -5  13 79.2388 11.2598  38
  -4   5 -13 94.8734 14.9284  27
   4  -5  12 40.4222 11.3741  38
  -4   5 -12 58.4151 15.3016  27
   4  -5  11 99.8793 14.0106  38
  -4   5 -11 72.3682 18.1626  27
  -4   5 -10 80.7961 18.3279  27
  -4   5  -9-16.6806 18.3151  27
  -4   5  -8 32.3230 19.4641  27
  -4   5  -7 311.383 28.1530  27
  -4   5  -6 24.4315 19.7127  27
  -4   5  -5 44.3846 21.0170  27
  -4   5  -4 227.099 26.4417  27
  -4   5  -3-7.13329 20.0828  27
  -4   5  -2 494.351 35.2807  27
  -4   5  -1 24.6332 17.8886  34
  -4   5  -1 24.3224 20.0181  27
  -4   5   0 13.1061 16.4230  34
  -4   5   1 49.7518 18.2760  34
  -4   5   2 604.574 36.6349  34
  -4   5   3 8.86072 16.0550  34
  -4  -5   4 289.561 25.7958  36
   4   5  -4 246.740 33.1071  25
  -4   5   4 314.611 25.0194  34
  -4  -5   5 55.3981 17.5039  36
   4   5  -5 17.1653 25.4646  25
  -4   5   5 68.7885 17.4262  34
   4   5  -6 16.9311 24.1728  25
  -4   5   6 14.5823 14.3219  34
   4   5  -7 259.626 32.5312  25
  -4   5   7 351.878 24.8406  34
   4   5  -8 28.8504 23.5524  25
  -4   5   8 26.5950 14.5352  34
   4   5  -9-2.06315 21.3135  25
  -4   5   9 2.74921 12.4078  34
   4   5 -10 46.8866 20.9599  25
  -4   5  10 57.6647 13.3873  34
   4   5 -11 68.1250 20.0557  25
  -4   5  11 76.1693 13.3246  34
   4   5 -12 55.6171 17.8891  25
  -4   5  12 66.3570 11.4476  34
  -4  -5  12 31.2403 10.0999  22
   4   5 -13 67.8569 15.9883  25
  -4   5  13 91.3404 10.9777  34
  -4  -5  13 104.685 10.7445  22
  -4   6  -9-14.6587 11.4850  27
  -4   6  -8 73.6047 14.0337  27
  -4   6  -7 20.6383 13.2141  27
  -4   6  -6 32.3313 14.2233  27
  -4   6  -5 42.1953 14.1284  34
  -4   6  -5 34.2299 14.6940  27
  -4   6  -4 100.331 16.2506  34
  -4   6  -3 24.8413 13.7355  34
  -4   6  -2 29.4533 14.0892  34
  -4   6  -1 173.453 18.7190  34
  -4   6   0 1.40463 13.2890  34
  -4   6   1 282.496 21.8216  34
  -4   6   2 39.2054 13.5340  34
   4   6  -3 9.64710 16.3415  25
  -4   6   3 5.22534 12.2817  34
   4   6  -4 124.338 19.8601  25
  -4   6   4 102.537 14.8706  34
   4   6  -5 53.8865 17.6613  25
  -4   6   5 68.5304 13.4750  34
   4   6  -6 24.9054 16.2470  25
  -4   6   6 45.0932 11.7638  34
   4   6  -7 14.8769 15.8218  25
  -4   6   7 25.1163 10.4883  34
   4   6  -8 66.7880 16.0739  25
  -4   6   8 91.9856 11.7724  34
   4   6  -9-10.5317 12.4885  25
  -4   6   9-4.64490 7.80442  34
  -5   0 -17-17.5946 19.7829  39
  -5   0 -16 63.3815 24.0633  39
  -5   0 -15 14.0145 23.9829  39
  -5   0 -14 150.138 28.7123  39
  -5   0 -13 41.4063 27.9143  39
  -5   0 -12 289.862 34.9843  39
  -5   0 -11 18.9035 27.5620  39
  -5   0 -10 585.048 43.8675  39
  -5   0  -9 15.8331 26.5477  39
  -5   0  -8 1089.93 75.2359  20
  -5   0  -8 1066.08 59.1646  39
  -5   0  -7 34.1869 31.1733  20
   5   0   7 5.34878 13.2107  38
  -5   0  -7 10.5491 27.0762  39
   5   0   6-10.4997 13.8160  38
  -5   0  -6 13.8305 29.6334  20
   5   0   6-21.4865 16.5657  30
  -5   0  -6 4.04053 24.2954  39
   5   0   5 3.87934 12.8460  38
  -5   0  -5-23.2761 25.1495  39
  -5   0  -5 30.5610 29.7631  20
   5   0   5-6.41510 15.0755  30
   5   0   4 179.631 19.1405  38
  -5   0  -4 195.401 35.0927  20
   5   0   4 207.830 21.1144  30
  -5   0  -4 180.827 27.6267  39
   5   0   3 3.85216 13.5824  38
   5   0   3-10.5720 14.4708  30
  -5   0  -3 8.96819 21.9495  39
  -5   0  -2 318.775 29.5828  39
   5   0   2 319.638 24.7692  30
  -5   0  -2 405.333 41.6754  20
   5   0   1-4.40082 14.6998  30
  -5   0  -1-1.67811 20.5752  39
   5   0   0 1.46355 14.0228  30
  -5   0   0 2.44600 14.7060  10
  -5   0   0-9.80496 20.3773  39
   5   0  -1-19.2266 13.9945  30
  -5   0   1 7.61120 15.1340  10
   5   0  -1-4.98058 14.2124  28
  -5   0   2 245.744 27.8021  10
   5   0  -2 317.215 23.0859  28
  -5   0   3 11.0369 16.7214  10
   5   0  -3 1.38019 15.4372  28
  -5   0   4 169.994 25.2043  10
   5   0  -4 179.143 21.7496  28
   5   0  -5 15.5544 19.6373  17
  -5   0   5-18.0670 17.0693  10
  -5   0   6-1.58283 14.8788  32
  -5   0   6-3.13983 16.9849  10
   5   0  -6-2.83310 20.1314  17
  -5   0   7-6.54589 15.1829  32
  -5   0   7 6.53188 19.6365  10
   5   0  -7 27.6232 20.6648  17
  -5   0   8 1156.87 54.0628  32
   5   0  -8 1115.42 66.2970  17
  -5   0   9 1.72633 15.0806  32
  -5   0  10 723.175 39.7879  32
  -5   0  11 1.73321 15.8091  32
  -5   0  12 286.297 24.5872  32
  -5   0  13 17.3356 14.7775  32
  -5   0  14 171.130 18.9776  32
  -5   0  15 13.5570 12.2163  32
  -5   0  17-6.44646 10.4681  31
  -5   1 -17 47.3011 20.3461  39
  -5   1 -16 36.2435 22.6008  39
  -5   1 -15 23.5993 23.9869  39
  -5   1 -14 149.551 29.9353  39
  -5   1 -13-9.21677 26.8146  39
  -5   1 -12 81.1309 29.6615  39
  -5   1 -11 101.567 29.5085  39
   5  -1  10 852.282 42.5219  38
  -5   1 -10 848.095 53.6491  39
   5  -1   9 22.2315 14.8617  38
  -5   1  -9-2.37040 27.8216  39
   5  -1   8 21.9486 15.8506  38
   5  -1   8 26.5623 20.9405  14
  -5  -1  -8 5.29197 29.7386  20
  -5   1  -8 5.13391 29.6269  20
  -5   1  -8 62.4190 28.5176  39
   5  -1   7 418.130 27.9178  38
   5  -1   7 426.522 40.2305  14
  -5  -1  -7 437.007 49.8508  20
  -5   1  -7 390.493 38.2163  39
   5  -1   6 36.5655 22.4662  14
  -5  -1  -6 47.8405 30.1657  20
   5  -1   6 60.6370 15.7492  38
   5  -1   6 73.9562 17.1368  30
  -5   1  -6 51.7806 27.8521  39
   5  -1   5 123.515 17.3026  38
  -5  -1  -5 73.3815 32.9742  20
   5   1   5 94.4915 18.4855  30
   5  -1   5 114.424 19.1129  30
  -5   1  -5 103.935 28.7033  39
   5  -1   4 1701.99 70.1613  38
   5   1   4 1628.84 72.0532  30
   5  -1   4 1812.77 72.0255  30
  -5   1  -4 1856.13 78.8489  39
   5  -1   3 985.960 45.2395  38
  -5   1  -3 752.335 45.9550  35
   5   1   3 913.714 59.9330  21
  -5  -1  -3 882.743 63.5592  20
   5   1   3 1116.87 48.7377  30
   5  -1   3 1078.56 46.8524  30
  -5   1  -3 1083.95 53.5244  39
   5  -1   2 4.13627 14.0784  38
  -5   1  -2 30.0217 19.0807  35
  -5  -1  -2 33.0988 26.9736  20
   5   1   2 71.2710 16.6667  30
   5  -1   2 17.6455 14.5495  30
   5   1   2 16.1700 12.7392  28
  -5   1  -2 44.7263 23.2551  39
   5  -1   1 762.230 39.2541  38
  -5   1  -1 764.640 41.4777  35
  -5  -1  -1 742.990 56.0528  20
   5   1   1 847.850 42.0535  30
   5  -1   1 774.131 39.5082  30
   5   1   1 808.990 38.0082  28
  -5   1  -1 887.887 46.0687  39
  -5   1   0 52.2480 19.8311  35
  -5  -1   0 66.9666 30.9318  20
   5   1   0 74.2508 17.4527  30
   5  -1   0 68.0123 15.8625  30
   5   1   0 51.0552 15.4586  28
  -5   1   0 45.6578 22.7427  39
  -5   1   1 777.067 40.6300  35
   5   1  -1 778.953 41.4229  30
   5   1  -1 800.036 38.4129  28
  -5  -1   2 43.6050 22.8922  13
   5   1  -2 53.5394 17.1354  30
  -5   1   2 13.4157 16.6751  10
   5   1  -2 30.5356 14.9598  28
  -5  -1   3 1017.99 56.2091  10
  -5   1   3 974.337 54.7346  10
   5   1  -3 931.720 45.0287  28
  -5  -1   4 1878.52 84.2546  10
   5   1  -4 1696.06 72.9201  28
  -5  -1   5 123.469 17.8995  32
  -5  -1   5 79.8135 21.2055  10
   5   1  -5 92.7242 19.6757  28
   5  -1  -6 35.8245 24.1376  17
  -5  -1   6 55.4052 16.2499  32
  -5  -1   6 73.0701 20.6696  10
   5   1  -6 81.9894 19.7785  28
  -5  -1   7 439.290 29.3439  32
  -5   1   7 402.390 28.5167  32
  -5  -1   7 408.544 36.7700  10
   5  -1  -7 473.855 44.0206  17
  -5  -1   8 38.5252 15.7303  32
  -5   1   8 23.4565 15.0544  32
   5   1  -8 34.6887 24.5003  17
   5  -1  -8 33.8375 26.8882  17
  -5  -1   9 12.0813 16.2241  32
  -5   1   9-1.68343 15.5136  32
  -5  -1  10 731.081 41.7082  32
  -5   1  10 736.409 40.6801  32
  -5  -1  11 96.5594 17.6628  36
  -5  -1  11 101.449 18.9464  32
  -5   1  11 125.271 18.7971  32
  -5  -1  12 147.566 18.5170  36
  -5  -1  12 120.655 20.6235  32
  -5  -1  13 8.23005 12.8563  36
  -5  -1  13 12.8206 15.7845  32
  -5  -1  14 138.959 17.1202  36
  -5  -1  14 183.803 19.5903  32
  -5  -1  15 23.5448 12.3262  36
  -5  -1  15 16.5585 13.2467  32
  -5  -1  16 64.7155 12.3172  36
  -5  -1  16 56.0751 12.7267  31
  -5   1  16 48.2352 11.9917  31
  -5  -1  17 5.86842 9.45100  31
  -5   1  17 14.9489 9.42192  31
   5   1 -17 1.41265 16.8878  29
   5   2  16 63.2618 13.3662  23
  -5   2 -16 102.012 19.6546  39
   5   2  15 21.1300 13.5930  23
  -5   2 -15 49.8165 21.5164  39
   5   2  14 156.151 19.0729  23
  -5   2 -14 135.641 26.0197  39
   5  -2  13 13.1406 13.8683  38
  -5   2 -13 2.06018 23.9251  39
   5  -2  12 23.0808 14.7076  38
  -5   2 -12-15.3298 25.3794  39
   5  -2  11 30.5887 16.4692  38
  -5   2 -11-31.8271 26.3441  39
   5  -2  10 36.3144 15.7530  38
  -5   2 -10 64.8019 27.5346  39
   5  -2   9 25.5926 15.8010  38
   5   2   9-9.97783 17.9505  23
  -5   2  -9 11.5997 26.8260  39
   5  -2   8 59.1711 17.7771  38
  -5   2  -8 70.7944 22.1972  35
   5   2   8 38.5672 19.2692  23
  -5   2  -8 55.0416 28.3406  39
   5  -2   7 41.2383 17.1959  38
  -5   2  -7 39.6143 21.1810  35
   5   2   7 64.1362 21.4173  23
  -5   2  -7 56.3202 27.3522  39
   5  -2   6 109.704 19.8155  38
  -5   2  -6 58.1560 21.7019  35
   5   2   6 117.191 23.0727  23
   5   2   6 114.875 29.8024  21
  -5  -2  -6 25.0252 29.7674  20
  -5   2  -6 105.364 28.1867  39
   5  -2   5 72.7609 17.6487  38
  -5   2  -5 75.9173 21.1959  35
   5   2   5 32.5999 21.2384  23
   5   2   5 35.6682 26.5777  21
  -5  -2  -5 9.70371 27.5650  20
  -5   2  -5 87.5394 26.9811  39
   5  -2   4 122.678 19.0543  38
  -5   2  -4 123.654 23.2421  35
   5   2   4 149.715 24.2569  23
   5   2   4 127.494 30.3992  21
  -5  -2  -4 89.4559 33.6981  20
   5   2   4 88.4734 20.0650  30
  -5   2  -4 140.512 26.8678  39
   5  -2   3 266.819 23.4206  38
  -5   2  -3 212.409 25.5287  35
   5   2   3 228.916 27.3498  23
  -5   2  -3 334.190 32.5392  39
   5   2   3 272.597 37.9864  21
   5   2   3 292.709 25.6526  30
  -5  -2  -3 234.012 39.0807  20
   5  -2   2 1199.31 55.3733  38
  -5   2  -2 1202.82 57.4301  35
   5   2   2 1382.59 60.5493  23
   5   2   2 1209.50 72.0455  21
  -5  -2  -2 1222.55 75.5352  20
   5   2   2 1206.59 57.7477  30
  -5   2  -2 1248.26 60.7930  39
  -5   2  -1 133.514 22.3418  35
   5   2   1 148.920 25.1385  23
   5   2   1 158.740 21.1610  30
  -5   2  -1 158.085 25.7612  39
  -5   2   0 17.4346 19.0587  35
  -5  -2   0 4.20522 24.0490  13
   5   2   0-7.63692 22.3578  23
   5   2   0 20.3837 16.9024  30
   5   2   0-1.30201 13.9479  28
  -5   2   0-20.1385 22.2749  39
  -5   2   1 111.635 21.0045  35
  -5  -2   1 104.401 28.3804  13
   5   2  -1 119.957 20.5461  30
   5   2  -1 116.291 17.2087  28
  -5   2   2 1316.36 59.1370  35
  -5  -2   2 1279.69 75.6798  13
   5   2  -2 1359.64 57.9819  28
  -5   2   3 271.114 24.4092  35
  -5  -2   3 205.655 32.2286  13
   5   2  -3 239.274 22.4772  28
  -5  -2   4 128.468 19.3210  36
  -5   2   4 120.751 20.3704  35
  -5  -2   4 127.130 27.5649  13
   5   2  -4 111.407 19.6706  28
  -5  -2   5 51.1152 17.0760  36
  -5   2   5 60.3575 17.2615  35
  -5  -2   5 20.4293 22.1411  13
  -5   2   5 19.8971 19.8097  11
  -5  -2   5 49.0762 22.0663  10
   5   2  -5 21.5933 18.9601  28
  -5  -2   6 96.7779 19.3968  36
   5   2  -6 94.8939 22.5478  28
  -5  -2   7 39.0280 16.0472  36
   5   2  -7 61.0930 19.6487  28
  -5  -2   8 37.3630 16.9538  36
  -5  -2   8 20.9489 15.4324  32
   5   2  -8 48.4116 20.0898  28
  -5  -2   9 19.3885 15.1403  36
   5   2  -9-6.12870 18.3112  33
  -5  -2   9 14.8832 15.6973  32
   5   2  -9-5.98872 19.6588  28
  -5  -2  10 92.2587 17.1283  36
  -5   2  10 105.237 18.0022  34
   5   2 -10 73.6995 20.8601  33
  -5  -2  10 103.247 18.1688  32
  -5  -2  11 13.8271 14.8148  36
  -5   2  11 1.66196 15.3177  34
   5   2 -11 14.9162 19.1684  33
  -5  -2  11 4.92681 15.3898  32
  -5  -2  12 30.5849 15.2170  36
  -5   2  12 24.3121 15.4424  34
   5   2 -12-16.8119 19.3735  33
  -5  -2  12 22.1391 16.0359  32
  -5  -2  13 6.71676 13.7335  36
  -5   2  13 28.9969 15.0780  34
  -5  -2  13 2.94953 13.6418  32
  -5  -2  14 98.3658 14.8566  36
  -5   2  14 148.277 18.1045  34
  -5  -2  15 56.8432 12.7555  36
  -5   2  15 42.2283 13.2612  34
   5   2 -15 20.1336 17.1834  29
  -5  -2  16 50.9170 10.9800  36
   5   2 -16 81.7268 17.5337  29
   5   3  15-6.27929 10.9584  23
   5  -3  14 70.7288 12.9964  38
   5   3  14 92.7302 15.5578  23
   5  -3  13 169.279 17.8117  38
   5   3  13 150.807 18.8574  23
   5  -3  12 156.316 18.8311  38
   5   3  12 169.803 19.6832  23
   5  -3  11 28.2028 15.2200  38
   5   3  11 2.95542 16.1137  23
   5  -3  10 47.3107 16.7657  38
   5   3  10 53.1322 19.3065  23
   5  -3   9 127.851 19.7833  38
   5   3   9 89.5450 20.6731  23
   5  -3   8 15.0750 16.3167  38
   5   3   8 35.2599 19.4297  23
   5  -3   7 1.69058 15.8914  38
   5   3   7-3.44542 19.0891  23
   5  -3   6 50.7455 17.5396  38
   5   3   6 37.0050 19.9004  23
   5  -3   5 484.642 31.9630  38
  -5   3  -5 473.051 32.8754  35
   5   3   5 438.629 33.3176  23
  -5   3  -4 679.608 39.1713  35
   5   3   4 642.455 40.0408  23
  -5   3  -3-27.0783 20.2777  35
   5   3   3-3.81193 21.0785  23
  -5   3  -2 146.419 22.1258  35
  -5  -3  -2 119.748 28.7474  13
   5   3   2 145.843 26.5537  23
   5   3   2 159.072 33.3016  21
  -5   3  -1 185.225 23.4017  35
  -5  -3  -1 96.3202 29.8780  13
   5   3   1 130.658 25.8241  23
  -5   3   0 26.6043 19.1643  35
  -5  -3   0 27.3798 24.2131  13
  -5   3   1 116.768 20.8939  35
  -5  -3   1 104.485 29.2428  13
  -5   3   2 177.135 23.0789  35
  -5  -3   2 199.744 33.6040  13
   5   3  -2 136.249 19.6760  28
  -5   3   3 12.7941 17.4330  35
   5   3  -3 9.35591 16.1992  28
  -5  -3   4 614.229 38.0678  36
  -5   3   4 671.118 37.1779  35
   5   3  -4 647.908 38.1238  33
   5   3  -4 641.818 36.9166  28
  -5  -3   5 332.022 29.3631  36
  -5   3   5 400.294 28.4621  35
   5   3  -5 417.244 30.2387  33
   5   3  -5 382.544 29.1372  28
  -5  -3   6 37.3552 18.1501  36
  -5   3   6 40.9855 17.0545  35
  -5   3   6 48.0908 15.5206  34
   5   3  -6 62.8329 19.2023  33
   5   3  -6 54.6720 20.0150  28
  -5  -3   7 10.4470 17.7454  36
  -5   3   7 8.36639 14.3417  34
   5   3  -7 1.95531 16.8237  33
   5   3  -7 7.27372 18.5327  28
  -5  -3   8 27.1926 17.4033  36
  -5   3   8 18.5959 14.8654  34
   5   3  -8 45.8526 17.9026  33
   5   3  -8 51.8832 20.0783  28
  -5   3   9 110.679 18.4847  34
   5   3  -9 106.487 21.3173  33
  -5  -3  10 21.7263 16.0370  36
  -5   3  10 4.91544 14.1567  34
   5   3 -10 11.9616 17.9361  33
  -5  -3  11 21.7006 15.1498  36
  -5   3  11 6.26707 14.4431  34
   5   3 -11 5.81198 17.1807  33
  -5  -3  12 190.755 18.6812  36
  -5   3  12 148.403 18.7632  34
   5   3 -12 153.281 22.2165  33
  -5  -3  13 122.145 15.2874  36
  -5   3  13 91.6303 15.9379  34
  -5  -3  14 62.4704 12.3820  36
  -5   3  14 78.5988 14.1496  34
  -5  -3  15 2.42046 9.24975  36
  -5   3  15 16.2156 10.4716  34
   5   3 -15-7.67036 13.5635  29
   5  -4  13-7.21315 10.4516  38
   5   4  13-10.7750 10.8864  23
   5  -4  12 4.29112 11.6067  38
   5   4  12 1.05350 12.7932  23
   5  -4  11 4.88230 12.6802  38
   5   4  11 13.0828 13.6659  23
   5  -4  10 6.71503 13.4989  38
   5   4  10 10.4666 15.0322  23
   5  -4   9 141.111 18.7492  38
   5   4   9 97.3880 18.2080  23
   5  -4   8 66.4693 16.8398  38
   5   4   8 115.625 19.8531  23
   5  -4   7 259.923 22.3782  38
   5   4   7 203.861 24.4132  23
   5   4   6 320.399 27.6600  23
   5   4   5-1.72205 19.2594  23
   5   4   4 55.5181 20.3896  23
   5   4   3 1171.64 56.7853  23
  -5   4  -1 395.873 28.6111  35
  -5   4   0 42.2977 18.2855  35
  -5   4   1 451.375 30.3240  35
  -5   4   1 437.755 30.3677  34
  -5   4   2 261.281 24.5215  35
  -5   4   2 292.185 24.9708  34
  -5   4   3 1227.21 55.2952  35
  -5   4   3 1247.46 56.6117  34
   5   4  -3 1171.10 54.0491  28
  -5  -4   4 92.5780 20.5825  36
  -5   4   4 52.0754 17.7284  35
  -5  -4   5 24.7641 17.9366  36
  -5   4   5 25.3240 15.1974  34
   5   4  -5 5.45401 15.6526  33
  -5  -4   6 404.442 28.8914  36
  -5   4   6 396.604 27.4643  34
   5   4  -6 354.325 28.9425  33
  -5  -4   7 197.138 23.0416  36
  -5   4   7 231.483 22.4122  34
   5   4  -7 255.900 24.7109  33
  -5  -4   8 96.2608 16.6862  36
  -5   4   8 62.4919 15.8152  34
   5   4  -8 96.1070 19.5972  33
  -5  -4   9 117.438 17.6984  36
  -5   4   9 125.827 17.8724  34
  -5  -4  10 14.1556 13.6119  36
  -5   4  10-11.1917 13.3199  34
  -5  -4  11 10.2547 11.9903  36
  -5   4  11-8.91930 12.5100  34
  -5  -4  12 24.5207 11.0026  36
  -5   4  12-1.13271 11.5826  34
  -5  -4  13 20.1887 9.80141  36
  -5   4  13 10.5753 10.2865  34
  -5   4  14 20.7295 9.16668  34
   5  -5  11 7.80269 8.51655  38
   5  -5  10 84.6416 11.8585  38
  -5   5 -10 45.6520 12.8957  27
   5  -5   9 22.8289 12.3714  30
  -5   5  -9 20.8995 13.2657  27
  -5   5  -8 244.303 21.3132  27
  -5   5  -7-6.25681 15.2266  27
  -5   5  -6-15.9069 16.0115  27
  -5   5  -5 96.5884 18.8930  27
  -5   5  -4 2.83128 16.2272  27
  -5   5  -3-22.8144 14.4532  34
  -5   5  -3-18.6371 16.9429  27
  -5   5  -2 4.65025 14.3812  34
  -5   5  -1 34.3531 15.4201  34
  -5   5   0-9.38483 14.2210  34
  -5   5   1 23.3206 15.3748  34
  -5  -5   2 14.1896 15.2117  36
  -5   5   2 19.9468 13.6659  34
  -5  -5   3-15.3060 14.4503  36
  -5   5   3-24.0493 14.3726  34
  -5  -5   4 20.5500 14.1766  36
  -5   5   4 29.2611 14.3460  34
  -5  -5   5 124.941 17.1423  36
  -5   5   5 114.254 16.9372  34
  -5  -5   6 25.7786 12.9078  36
  -5   5   6 25.5575 13.4682  34
  -5  -5   7 42.5255 13.1801  36
  -5   5   7 12.6560 11.8907  34
  -5  -5   8 275.504 19.2503  36
  -5   5   8 238.719 19.2187  34
  -5  -5   9 19.4508 10.1267  36
  -5   5   9 29.9165 11.4456  34
  -5  -5  10 74.1949 10.8712  36
  -5   5  10 59.1241 11.3556  34
  -5   5  11 3.18076 8.64579  34
   5  -6   6 15.8927 9.70658  30
  -5   6  -5 20.1232 8.92438  34
  -5   6  -4 74.6361 11.7365  34
  -5   6  -3 22.4788 9.73142  34
  -5   6  -2-1.94942 9.98798  34
  -5  -6  -1 14.7972 10.7797  36
  -5   6  -1 1.00050 10.1426  34
  -5  -6   0 5.86141 10.5465  36
  -5   6   0 10.0606 10.1136  34
  -5  -6   1 17.1195 10.4754  36
  -5   6   1 11.0110 10.1270  34
  -5  -6   2-1.81848 9.61837  36
  -5   6   2-5.89900 9.76777  34
  -5   6   3 8.55754 9.47760  34
  -5   6   4 69.6472 11.0432  34
  -5   6   5 16.8805 8.57258  34
  -5   6   6 17.6701 8.51410  34
  -6   0 -15 18.5287 15.8989  35
  -6   0 -14 127.724 22.2191  39
  -6   0 -13-8.95447 21.0615  39
  -6   0 -12 158.664 25.9996  39
  -6   0 -11 6.25364 23.2072  39
  -6   0 -10 169.221 28.1343  39
  -6   0  -9 35.4786 25.3345  39
  -6   0  -8 663.517 44.2409  39
  -6   0  -7 22.2003 23.4945  39
   6   0   6 1005.00 52.0017  30
  -6   0  -6 1162.58 58.7219  39
   6   0   5-9.59621 16.5759  30
  -6   0  -5 34.4391 25.9336  39
   6   0   4 398.377 30.8922  30
   6   0   4 464.598 28.5386  28
  -6   0  -4 506.972 37.9502  39
  -6   0  -3 1.75056 20.9660  35
   6   0   3 9.36850 17.4982  30
   6   0   3 2.76969 14.7234  28
  -6   0  -3-10.2659 24.7375  39
   6   0   2 18.5492 17.9876  30
   6   0   2 49.2853 15.9123  28
  -6   0  -2 54.0212 24.6139  39
   6   0   1-1.84462 17.0557  30
   6   0   1 5.75683 15.6088  28
   6   0   0 112.565 20.3308  30
   6   0   0 100.583 18.3149  28
   6   0  -1-9.31652 16.7595  30
   6   0  -1 6.12034 15.4630  28
   6   0  -2 47.7459 18.0345  28
   6   0  -3-16.6380 18.0093  28
   6   0  -4 369.233 29.4526  28
  -6   0   5 27.5353 16.7622  32
   6   0  -5 16.3809 19.0691  28
  -6   0   6 1109.27 52.6667  32
  -6   0   7-7.00527 16.0308  32
  -6   0   8 626.674 36.4852  32
  -6   0   9 15.4622 16.9757  32
  -6   0  10 154.266 19.7952  32
  -6   0  11-4.69258 14.4636  32
  -6   0  12 136.291 17.8216  32
  -6   0  13-2.52164 12.2680  32
  -6   0  14 111.122 14.3306  32
  -6   0  15 6.79057 9.09571  32
  -6   1 -15 349.114 26.4427  39
  -6   1 -14 314.568 28.4304  39
  -6   1 -13 111.481 20.0664  35
  -6   1 -13 149.740 24.4756  39
  -6   1 -12 222.159 25.0158  35
  -6   1 -12 282.226 30.0149  39
  -6   1 -11 235.837 25.6848  35
  -6   1 -11 270.844 32.7519  39
   6  -1  10 80.3373 16.6588  38
  -6   1 -10 86.2420 22.0812  35
  -6   1 -10 134.323 29.3369  39
   6  -1   9 305.987 23.7846  38
  -6   1  -9 216.492 27.2476  35
  -6   1  -9 309.196 34.4977  39
   6  -1   8 1.55581 14.7259  38
  -6   1  -8 18.5477 21.2187  35
  -6   1  -8 46.7312 28.0995  39
   6  -1   7 74.5804 17.0276  38
  -6   1  -7 91.7077 24.2289  35
   6  -1   7 71.8063 19.2574  30
  -6   1  -7 135.953 29.0452  39
   6  -1   6 96.4191 18.1193  38
  -6   1  -6 95.5992 23.4100  35
   6   1   6 90.6056 20.3587  30
   6  -1   6 79.4742 19.6393  30
  -6   1  -6 109.484 28.9468  39
   6  -1   5 288.758 24.6231  38
  -6   1  -5 226.707 27.8632  35
   6  -1   5 312.664 26.6410  30
   6   1   5 249.927 26.3230  30
  -6   1  -5 307.707 33.5355  39
   6  -1   4 409.336 28.8274  38
  -6   1  -4 398.351 33.0282  35
   6   1   4 390.727 30.7186  30
   6  -1   4 382.503 29.7753  30
  -6   1  -4 436.890 37.5686  39
  -6   1  -3 54.4755 23.1427  35
   6   1   3 73.5319 20.5718  30
   6  -1   3 44.3071 18.3412  30
  -6   1  -3 70.5023 25.7148  39
  -6   1  -2 343.923 30.3971  35
   6   1   2 357.153 28.8642  30
  -6  -1  -2 259.372 41.2917  20
   6  -1   2 312.801 26.9663  30
   6   1   2 317.605 24.3426  28
  -6   1  -2 337.541 34.4090  39
  -6   1  -1 599.770 37.4722  35
   6   1   1 568.202 36.1801  30
   6  -1   1 580.155 35.5265  30
   6   1   1 524.970 31.8501  28
  -6   1  -1 586.414 40.5879  39
  -6   1   0 640.585 39.7174  35
   6   1   0 649.811 39.5330  30
   6  -1   0 723.070 39.7572  30
   6   1   0 692.751 36.6011  28
   6  -1  -1 587.627 35.5596  30
   6   1  -1 610.975 33.9149  28
   6  -1  -1 562.647 34.6807  28
   6   1  -2 318.349 28.2750  30
   6  -1  -2 296.366 26.4575  28
   6   1  -2 264.118 24.4901  28
   6   1  -3 62.6925 18.6484  28
   6  -1  -3 32.5506 19.2724  28
   6   1  -4 365.633 28.9599  28
  -6  -1   5 307.596 24.7368  32
   6   1  -5 345.902 28.4975  28
  -6  -1   6 105.326 17.7378  32
  -6   1   6 76.7848 18.5704  32
   6   1  -6 99.3129 21.1477  28
  -6  -1   7 85.1903 17.6389  32
  -6   1   7 90.0793 18.3873  32
   6   1  -7 54.0268 20.3181  28
  -6  -1   8 23.4515 15.5840  32
  -6   1   8 46.6411 16.2273  32
  -6  -1   9 305.022 25.5622  32
  -6   1   9 305.310 25.2924  32
  -6  -1  10 90.1755 18.5344  32
  -6   1  10 112.365 18.3055  32
   6   1 -11 274.204 26.6418  33
  -6  -1  11 271.527 23.5334  32
  -6   1  11 262.886 22.4387  32
   6   1 -12 224.529 25.0221  33
  -6  -1  12 252.483 21.3487  32
  -6   1  12 220.144 20.1370  32
  -6  -1  13 146.662 17.2752  32
  -6  -1  14 301.320 20.6067  32
  -6   2 -14 11.6692 16.4094  39
  -6   2 -13 35.1085 18.3568  39
   6  -2  12 1.16914 12.4301  38
  -6   2 -12 5.18616 20.7872  39
   6  -2  11 39.5545 14.5997  38
  -6   2 -11 36.0755 22.7775  39
   6  -2  10 12.9517 14.8734  38
  -6   2 -10 12.4107 17.8657  35
  -6   2 -10 16.2834 22.5588  39
   6  -2   9-9.19095 15.3058  38
  -6   2  -9 33.0092 19.8461  35
  -6   2  -9-8.55196 23.1308  39
   6  -2   8 252.956 23.0899  38
  -6   2  -8 267.231 27.2638  35
   6  -2   8 226.261 23.8161  30
  -6   2  -8 264.667 30.7403  39
   6  -2   7-14.8546 16.9131  38
  -6   2  -7 12.4309 19.5399  35
   6  -2   7 1.85902 16.0560  30
  -6   2  -7-4.48992 25.0502  39
   6  -2   6 441.565 29.5351  38
  -6   2  -6 398.104 31.8591  35
   6  -2   6 384.619 30.0075  30
  -6   2  -6 372.385 35.3733  39
   6  -2   5 8.55427 16.0844  38
  -6   2  -5-1.82874 19.9798  35
   6  -2   5 36.0784 18.4218  30
  -6   2  -5-20.2421 24.3941  39
   6  -2   4 38.0577 17.7127  38
  -6   2  -4 42.0186 21.9523  35
   6   2   4 25.2720 17.7988  30
   6  -2   4 22.7926 18.0043  30
  -6   2  -4 46.7529 25.3765  39
   6  -2   3 141.460 21.5091  38
  -6   2  -3 108.904 23.5861  35
   6   2   3 139.300 22.7692  30
   6  -2   3 198.768 22.6827  30
  -6   2  -3 153.366 28.5587  39
   6  -2   2 153.169 22.2859  38
  -6   2  -2 189.551 25.2334  35
   6   2   2 141.369 22.9187  30
   6  -2   2 135.680 21.8038  30
  -6   2  -2 163.104 27.9811  39
  -6   2  -1 673.789 41.0479  35
   6  -2   1 726.288 40.3435  30
  -6   2   0 50.5538 19.7184  35
   6  -2   0 78.6108 18.6331  30
   6   2   0 41.5913 15.7018  28
  -6   2   1 752.005 40.8057  35
   6   2  -1 680.824 37.9068  28
  -6   2   2 148.984 22.5076  35
   6   2  -2 174.553 21.0571  28
  -6   2   3 203.752 23.2172  35
   6   2  -3 190.692 22.3989  28
  -6   2   4 38.5801 16.9721  35
   6   2  -4 56.2104 18.4953  28
   6   2  -5 1.76073 17.5422  28
   6   2  -6 331.270 28.8804  28
  -6   2   7 11.7077 15.3088  32
   6   2  -7-3.69415 17.4756  28
  -6  -2   8 199.995 20.2494  36
   6   2  -8 187.988 22.8364  33
  -6   2   8 195.642 20.6949  32
   6   2  -8 196.778 24.2764  28
  -6  -2   9 16.9840 14.2325  36
   6   2  -9 11.4027 16.9801  33
  -6  -2   9 5.86754 13.1576  32
   6   2  -9 40.0777 19.2270  28
  -6  -2  10 37.2245 14.0090  36
  -6  -2  10 33.8027 13.9700  32
  -6  -2  11 15.9121 12.9318  36
   6   2 -11 34.1809 17.7804  33
  -6  -2  11 17.1853 12.9582  32
  -6  -2  12 19.7176 12.3634  36
   6   2 -12 16.7668 16.1366  33
  -6  -2  12 34.9474 12.6759  32
  -6  -2  13 18.9869 11.5576  36
  -6  -2  13 47.6338 12.2355  32
  -6  -2  14 14.1872 9.45195  36
   6  -3  13-0.81589 9.88844  38
   6   3  13-2.47974 10.6256  23
   6  -3  12 34.0276 12.0616  38
   6   3  12 31.6435 12.5606  23
   6  -3  11 1.16238 12.1368  38
   6   3  11 4.53745 13.4497  23
   6  -3  10 247.174 20.4715  38
   6   3  10 192.265 20.4567  23
  -6   3 -10 218.884 24.3607  39
   6  -3   9 310.321 23.8798  38
   6   3   9 299.789 24.5319  23
  -6   3  -9 279.720 27.0028  39
   6  -3   8 157.080 19.2256  38
   6   3   8 181.236 21.2048  23
   6  -3   8 173.050 20.5806  30
  -6   3  -8 106.762 22.9688  39
   6  -3   7-1.58224 15.1174  38
   6   3   7 12.6314 17.6628  23
   6  -3   7 36.9710 17.2890  30
  -6   3  -7-1.85608 20.0843  39
   6  -3   6 132.390 19.8280  38
  -6   3  -6 147.867 21.4284  35
   6   3   6 106.712 21.9138  23
   6  -3   6 119.210 21.4376  30
  -6   3  -6 108.741 24.7961  39
   6  -3   5 1377.04 61.1137  38
  -6   3  -5 1315.02 60.7819  35
   6   3   5 1369.24 63.0707  23
   6  -3   5 1416.16 63.0151  30
  -6   3  -5 1298.37 63.8060  39
  -6   3  -4 486.264 33.2093  35
   6   3   4 483.531 34.5295  23
   6  -3   4 520.446 34.6275  30
  -6   3  -3 448.653 33.1429  35
   6  -3   3 590.342 35.2814  30
  -6   3  -2 1971.12 81.7408  35
   6  -3   2 1918.77 82.8854  30
  -6   3  -1 1866.93 78.7850  35
   6  -3   1 1865.09 79.9862  30
  -6   3   0 3757.74 142.136  35
  -6   3   1 1610.59 74.3770  35
   6   3  -1 1914.53 74.0097  28
  -6  -3   2 1912.07 84.0900  36
  -6   3   2 2195.02 84.8933  35
   6   3  -2 2048.12 83.1796  28
  -6  -3   3 435.572 31.7184  36
  -6   3   3 525.901 32.4037  35
   6   3  -3 511.355 31.7521  28
  -6  -3   4 508.823 33.2222  36
  -6   3   4 537.150 33.0268  35
   6   3  -4 525.172 32.9714  28
  -6  -3   5 1478.90 63.5062  36
  -6   3   5 1432.03 61.5322  35
   6   3  -5 1428.43 63.6806  33
   6   3  -5 1359.72 62.6674  28
  -6  -3   6 116.306 19.8058  36
   6   3  -6 113.165 20.3297  33
   6   3  -6 114.982 21.4686  28
  -6  -3   7-13.6341 14.5157  36
   6   3  -7 17.5945 15.9937  33
   6   3  -7 21.2457 17.5077  28
  -6  -3   8 164.078 19.0426  36
   6   3  -8 105.499 19.5160  33
   6   3  -8 166.284 20.8823  28
  -6  -3   9 291.425 22.5188  36
   6   3  -9 299.675 24.9721  33
  -6  -3  10 219.302 19.1054  36
   6   3 -10 200.259 21.9081  33
  -6  -3  11 36.3285 12.0519  36
   6   3 -11 24.9162 14.2141  33
  -6  -3  12 35.8502 11.1847  36
  -6  -3  13 14.3772 8.66840  36
   6  -4  11 12.1692 9.10337  38
   6  -4  10 5.69823 10.3751  38
   6   4  10-3.76419 11.4052  23
   6  -4   9 19.2201 11.6930  38
   6   4   9-9.57993 13.0758  23
   6  -4   9-13.1849 12.4158  30
   6  -4   8 5.82434 11.6822  38
   6   4   8 2.35390 13.5874  23
   6  -4   8 39.4621 14.3274  30
   6  -4   7 181.029 18.1270  38
   6  -4   7 152.068 19.6330  30
   6  -4   6 60.7406 17.2454  30
   6  -4   5 142.817 20.1383  30
   6  -4   4 53.8841 17.9039  30
  -6   4  -3 82.8433 16.2988  35
   6  -4   3 106.453 19.9952  30
  -6   4  -2 64.8401 16.2682  35
   6  -4   2 67.9986 18.5713  30
  -6   4  -1 66.1171 16.9340  35
   6  -4   1 78.5006 18.2429  30
  -6   4   0 42.9217 15.9024  35
  -6   4   1 91.2922 17.8937  35
  -6  -4   2 94.8099 18.5491  36
  -6   4   2 86.0752 16.3507  35
  -6  -4   3 89.3998 17.3254  36
  -6   4   3 49.5140 15.6065  35
  -6  -4   4 48.1476 16.2398  36
  -6  -4   5 139.248 18.4125  36
  -6  -4   6 37.8582 14.8260  36
  -6  -4   7 124.100 15.9874  36
  -6  -4   8 21.6786 12.2444  36
  -6  -4   9 12.2008 10.8918  36
  -6   4   9-7.39635 11.0903  34
  -6  -4  10 3.52580 9.41874  36
  -6   4  10-1.89029 9.60515  34
  -6  -4  11 17.6510 8.69252  36
  -6   4  11 4.83969 8.84119  34
   6  -5   7 17.6834 10.6973  30
   6  -5   6 206.470 17.7703  30
   6  -5   5-1.18210 11.9464  30
   6  -5   4 133.115 16.6925  30
   6  -5   3-3.83801 12.4485  30
   6  -5   2 2.57354 12.5961  30
  -6  -5  -1 28.7517 13.1233  36
  -6  -5   0 26.3937 12.6235  36
  -6  -5   1 60.2858 14.4148  36
  -6  -5   2 10.3340 12.4273  36
  -6  -5   3 9.88582 11.3217  36
  -6  -5   4 107.673 14.0399  36
  -6  -5   5 10.5459 10.1929  36
  -6   5   5-4.74706 9.20983  34
  -6  -5   6 141.922 13.7786  36
  -6   5   6 142.768 13.3880  34
  -6  -5   7 3.82718 8.81364  36
  -6   5   7 5.65534 8.48120  34
  -7   0 -13 6.06297 13.4999  35
  -7   0 -12 33.2289 15.9432  35
  -7   0 -11 34.9345 17.7262  35
  -7   0 -10 294.314 25.6029  35
  -7   0  -9-6.30683 18.7333  35
  -7   0  -8 19.9110 19.4825  35
  -7   0  -7 6.87910 20.2654  35
   7   0   7-9.02264 15.9409  30
  -7   0  -6 320.190 29.1160  35
   7   0   6 269.128 25.5616  30
  -7   0  -5 7.08169 20.8629  35
   7   0   5 5.80063 16.7645  30
  -7   0  -4 162.959 24.2080  35
   7   0   4 161.066 22.5862  30
   7   0   4 160.957 18.4740  28
   7   0   3 15.8520 18.1997  30
   7   0   3 2.87444 14.4040  28
   7   0   2 169.263 23.2489  30
   7   0   2 210.468 20.8386  28
   7   0   1 13.9867 16.8540  30
   7   0   1-6.10393 15.1597  28
   7   0   0-8.03469 17.7440  30
   7   0   0 1.57292 16.0738  28
   7   0  -1-2.01558 17.1390  30
   7   0  -1 14.5617 15.9338  28
  -7   0   2 203.993 21.4709  32
   7   0  -2 189.808 22.2741  28
  -7   0   3 3.25514 14.2193  32
   7   0  -3 10.2548 17.1764  28
  -7   0   4 167.679 20.2175  32
   7   0  -4 191.751 22.8994  28
  -7   0   5 16.1565 14.3877  32
   7   0  -5 17.6192 17.6137  28
  -7   0   6 255.674 23.3735  32
  -7   0   7-3.08526 14.2158  32
  -7   0   8 11.7795 13.7565  32
  -7   0   9-9.67779 13.5777  32
  -7   0  10 300.613 22.0507  32
  -7   0  11 6.77276 11.4737  32
  -7   0  12 18.2357 10.3254  32
  -7   0  13 7.00914 8.59256  32
  -7   1 -13 71.0091 13.4611  35
  -7  -1 -13 51.9091 14.1423  35
  -7   1 -13 61.2451 15.1463  39
  -7   1 -12 11.6873 13.7082  35
  -7  -1 -12 46.4097 15.5519  35
  -7   1 -12 21.4092 16.0703  39
  -7   1 -11-1.23491 15.1440  35
  -7  -1 -11 20.3429 15.9155  35
  -7   1 -11 8.72114 17.6873  39
  -7   1 -10 55.1165 17.6070  35
  -7  -1 -10 83.2641 19.2828  35
  -7   1 -10 61.6417 19.8241  39
  -7   1  -9 103.399 20.1233  35
  -7  -1  -9 88.8856 19.6762  35
  -7   1  -9 77.6356 22.2143  39
  -7   1  -8 39.9285 19.1514  35
  -7  -1  -8 17.0792 18.9140  35
  -7   1  -8 26.3108 21.7963  39
  -7   1  -7 53.5743 20.2807  35
   7  -1   7 41.7926 16.7727  30
  -7   1  -7-3.93311 21.3043  39
  -7   1  -6 27.6875 20.0082  35
   7   1   6-22.6333 17.7294  30
   7  -1   6 9.09056 15.4587  30
   7  -1   6 2.63672 13.3607  28
  -7   1  -6-12.1689 22.1565  39
  -7   1  -5 40.6432 21.3814  35
   7   1   5-13.6732 17.8247  30
   7  -1   5 31.8340 18.3382  30
   7  -1   5 23.5717 14.6011  28
  -7   1  -5 2.06410 22.9850  39
  -7   1  -4 12.4321 19.7830  35
   7   1   4 19.9473 18.5176  30
   7  -1   4 7.63002 16.6768  30
   7  -1   4 34.6539 15.2879  28
  -7   1  -3 1.76691 19.3509  35
   7   1   3 10.0941 17.0994  30
   7  -1   3 21.2189 18.4845  30
   7  -1   3 2.98794 14.6705  28
  -7   1  -2 50.7780 19.2830  35
   7   1   2 26.4212 17.6889  30
   7  -1   2 52.4348 18.2622  30
   7   1   2 48.3595 15.5789  28
   7  -1   2 52.3555 17.0145  28
  -7   1  -1-5.12732 18.8052  35
   7   1   1 4.08083 17.8243  30
   7  -1   1 3.90041 16.7781  30
   7   1   1 1.46766 14.4523  28
   7  -1   1-6.33140 15.8608  28
   7   1   0 6.13794 17.1178  30
   7  -1   0-1.95553 16.3611  30
   7   1   0-1.51157 14.8846  28
   7  -1   0 1.62485 16.4667  28
   7   1  -1-12.3012 18.1771  30
   7   1  -1 18.6612 16.4069  28
   7  -1  -1-9.98148 16.6221  28
   7   1  -2 16.4159 17.8808  30
   7   1  -2 71.8889 18.3203  28
   7  -1  -2 76.4438 19.4702  28
   7   1  -3-39.2958 17.1145  28
   7  -1  -3-6.90720 16.6678  28
  -7   1   4 11.9226 16.3279  32
   7   1  -4 20.0546 17.6399  28
  -7   1   5 6.66268 15.7589  32
   7   1  -5-11.8498 17.2514  28
  -7   1   6 6.44916 15.9354  32
   7   1  -6 32.1977 17.3281  28
  -7  -1   7 36.6238 13.5183  32
  -7   1   7 38.5132 15.2267  32
   7   1  -7 43.3411 17.5001  28
  -7  -1   8 24.4001 12.6983  32
  -7   1   8 36.2252 14.6362  32
  -7  -1   9 89.4096 15.5047  32
  -7   1   9 71.9628 14.4240  32
   7   1 -10 50.8147 16.2803  33
  -7  -1  10 98.4900 14.4393  32
  -7   1  10 73.0591 13.4860  32
   7   1 -11-8.55282 14.2044  33
  -7  -1  11 20.9114 10.9200  32
  -7   1  11 5.18630 10.8048  32
   7   1 -12 1.25610 12.4844  33
  -7  -1  12 14.3968 9.50117  32
  -7   1  12 14.5542 9.49463  32
  -7  -1  13 55.6682 9.50512  32
  -7   2 -12 40.6859 14.3766  39
  -7   2 -11-1.21565 15.2979  39
  -7   2 -10 26.5353 14.2484  35
  -7   2 -10 34.7702 17.2760  39
  -7   2  -9-13.7610 15.1709  35
  -7   2  -9-18.5191 18.4908  39
  -7   2  -8-1.36872 15.7915  35
   7  -2   8-1.48270 14.0725  30
  -7   2  -8 3.34353 18.7398  39
  -7   2  -7-13.1943 17.2775  35
   7  -2   7 1.61000 15.3805  30
  -7   2  -7-19.5281 20.7911  39
  -7   2  -6 20.0640 18.8297  35
   7  -2   6 22.1387 15.6583  30
  -7   2  -6 25.9441 21.0693  39
  -7   2  -5 9.55220 19.1099  35
   7  -2   5 14.1880 15.7866  30
  -7   2  -4 370.269 30.4212  35
   7  -2   4 432.121 30.5788  30
  -7   2  -3 52.5544 19.2177  35
   7  -2   3 11.1404 17.1967  30
  -7   2  -2 34.5836 19.4018  35
   7  -2   2 35.6700 17.8579  30
  -7   2  -1 19.4896 18.0242  35
   7  -2   1 15.1003 17.9992  30
   7  -2   1 50.9950 16.9716  28
  -7   2   0 17.4726 17.5673  35
   7  -2   0-3.78364 17.7905  30
   7   2   0 22.5431 14.8354  28
   7  -2   0 24.3319 17.1217  28
  -7   2   1 38.4909 18.3178  35
   7   2  -1 28.9528 15.3828  28
   7  -2  -1 21.3119 16.4094  28
  -7   2   2 47.1709 17.5535  35
   7   2  -2 87.3753 17.4544  28
   7   2  -3-12.0626 15.1145  28
   7   2  -4 363.139 26.9238  28
   7   2  -5 35.8690 14.3436  33
  -7   2   5 7.82626 14.2489  32
   7   2  -5 26.0169 15.9138  28
   7   2  -6 24.8920 14.5559  33
  -7   2   6 36.9603 15.0923  32
   7   2  -6 16.7249 15.3912  28
   7   2  -7 13.8081 14.4219  33
  -7   2   7-6.87412 12.6692  32
   7   2  -7 1.48584 15.1837  28
   7   2  -8 7.46295 13.9850  33
  -7   2   8 7.52271 12.1626  32
   7   2  -8-8.49822 14.9436  28
   7   2  -9-12.8318 13.4462  33
  -7   2   9 2.22287 10.8476  32
   7   2  -9-5.22393 14.1989  28
   7   2 -10 34.5881 14.1198  33
   7   2 -11 37.1505 13.7642  33
   7   2 -12 72.3370 12.9603  33
   7  -3   8 16.0064 12.8670  30
  -7   3  -7 235.784 19.7325  35
   7  -3   7 246.832 21.4465  30
  -7   3  -6 24.6174 13.7901  35
   7  -3   6-1.48521 14.5433  30
  -7   3  -5 63.7384 16.1352  35
   7  -3   5 25.0971 16.0109  30
  -7   3  -4 41.9074 15.9266  35
   7  -3   4 35.9561 16.5231  30
  -7   3  -3 731.507 36.8375  35
   7  -3   3 658.407 38.1376  30
  -7   3  -2 8.22465 15.1214  35
   7  -3   2 10.2345 15.8274  30
  -7   3  -1 430.084 27.6757  35
   7  -3   1 366.587 28.1237  30
  -7   3   0-1.36286 14.5629  35
  -7   3   1 383.135 26.2690  35
  -7   3   2 31.0303 14.8061  35
   7   3  -2 13.8445 13.6028  28
  -7   3   3 761.195 36.6131  35
   7   3  -3 677.487 35.4771  28
  -7   3   4 52.8601 14.8743  35
   7   3  -4 58.4820 15.3117  28
  -7   3   5 25.0510 13.1861  32
   7   3  -5 36.3940 14.2639  28
   7   3  -6 28.5002 12.5272  33
   7   3  -6 58.6068 14.8331  28
   7   3  -7 205.057 18.8115  33
   7   3  -8 14.1837 12.2199  33
   7   3  -9 19.6050 11.2106  33
   7  -4   7 25.2391 10.9890  30
   7  -4   6-1.09291 11.0450  30
   7  -4   5 17.7580 12.7593  30
  -7   4  -4 18.5422 10.3961  35
   7  -4   4-6.26644 12.4893  30
  -7   4  -3 38.7692 11.5168  35
   7  -4   3 20.7635 13.4115  30
  -7   4  -2 28.3183 11.3639  35
   7  -4   2 1.31634 12.7810  30
  -7   4  -1 22.2840 11.6514  35
  -7  -4   0 9.64413 11.2884  36
  -7   4   0 21.5456 11.2869  35
  -7  -4   1 27.5564 11.9424  36
  -7   4   1 26.3179 11.8254  35
  -7  -4   2 24.8274 11.5202  36
  -7  -4   3 19.9877 11.0169  36
  -7  -4   4 25.5283 11.0127  36
  -7  -4   5 16.6138 9.45361  36
  -7  -4   6 3.98132 9.08834  36
  -7  -4   7 22.5592 8.57794  36
  -8   0  -9-8.30283 12.4056  35
  -8   0  -8 4.10309 13.0949  35
  -8   0  -7-7.75943 13.7729  35
   8   0   7-4.97264 12.0241  30
   8   0   6-8.26192 13.1551  30
   8   0   5-28.0845 14.9680  30
   8   0   4 55.9044 16.0109  30
   8   0   4 50.3300 12.9473  28
   8   0   3 24.0937 15.1972  30
   8   0   3-5.70635 12.4687  28
   8   0   2 362.826 28.0007  30
   8   0   2 384.008 24.3842  28
   8   0   1 4.98548 14.8418  30
   8   0   1 4.99498 12.7969  28
   8   0   0 363.488 27.5035  30
   8   0   0 365.801 24.9613  28
   8   0  -1-19.8863 15.6847  30
   8   0  -1-6.58770 13.4340  28
   8   0  -2 352.544 24.9551  28
   8   0  -3 2.67675 13.9375  28
  -8   0   4 26.8934 12.0128  32
   8   0  -4 23.8054 14.5084  28
  -8   0   5 7.92880 10.6823  32
   8   0  -5-3.84145 13.9890  28
  -8   0   6 23.7071 10.9195  32
  -8   0   7 7.04473 9.91293  32
  -8   0   8-3.66962 9.75430  32
   8   0  -9 25.6047 11.8234  33
  -8   0   9-4.85394 8.64661  32
  -8   1  -9-2.58807 11.0321  35
  -8   1  -8 71.3635 14.1781  35
  -8   1  -7 3.21915 13.6740  35
   8  -1   7 3.59735 11.8433  30
  -8   1  -6 131.019 17.7437  35
   8  -1   6 112.623 16.8428  30
   8  -1   6 128.965 13.9636  28
  -8   1  -5 3.59487 14.1204  35
   8  -1   5 1.42347 13.0287  30
   8  -1   5 3.05199 11.3781  28
  -8   1  -4 30.8493 15.2217  35
   8  -1   4 7.48922 14.2080  30
   8  -1   4 50.5193 13.5044  28
  -8   1  -3 18.6020 13.8134  35
   8  -1   3 12.4139 14.0632  30
   8  -1   3 10.4961 12.5947  28
   8  -1   2 22.2277 14.6426  30
   8   1   2 17.5442 11.9645  28
   8  -1   2 13.4494 13.3057  28
   8  -1   1-6.42853 14.5583  30
   8   1   1-4.59002 12.1075  28
   8  -1   1-2.53611 13.3102  28
   8  -1   0 43.5298 16.1566  30
   8   1   0 51.0503 13.8707  28
   8  -1   0 15.6438 14.4314  28
  -8   1   1 20.5519 12.7303  32
   8   1  -1 7.29922 12.7090  28
   8  -1  -1 9.27038 14.0506  28
  -8   1   2 16.6030 11.8556  32
   8   1  -2 12.3502 13.2365  28
   8  -1  -2 6.65359 13.7903  28
  -8   1   3 1.25404 12.4947  32
   8   1  -3-12.4040 13.6810  28
   8  -1  -3 1.31452 13.8335  28
  -8   1   4 40.0851 12.6222  32
   8   1  -4 40.5883 13.8856  28
  -8   1   5 12.7532 11.5630  32
   8   1  -5 19.1890 12.7939  28
   8   1  -6 163.895 16.7801  33
  -8   1   6 159.921 16.2301  32
   8   1  -6 172.919 17.3796  28
   8   1  -7 15.7249 10.7142  33
  -8   1   7 16.9634 10.1896  32
   8   1  -7 27.4883 12.6029  28
   8   1  -8 84.8861 13.3230  33
  -8   1   8 73.1213 11.4679  32
   8   1  -9-2.91270 10.3226  33
  -8   1   9-2.30205 7.90627  32
  -8   2  -8 0.75063 9.89723  35
  -8   2  -7-13.6902 11.4114  35
   8  -2   7 13.4092 10.8262  30
   8  -2   7 2.97481 9.03097  28
  -8   2  -6 159.155 16.0515  35
   8  -2   6 165.702 16.9406  30
   8  -2   6 170.136 14.7451  28
  -8   2  -5 100.983 14.5927  35
   8  -2   5 93.2235 15.3623  30
   8  -2   5 100.509 13.3694  28
  -8   2  -4 389.987 23.8835  35
   8  -2   4 440.163 23.9210  28
  -8   2  -3 145.480 16.9007  35
   8  -2   3 162.846 18.4172  30
   8  -2   3 162.324 16.8123  28
  -8   2  -2 154.861 17.0922  35
   8  -2   2 122.672 17.9765  30
   8  -2   2 157.104 16.6023  28
  -8   2  -1 24.9384 12.8818  35
   8  -2   1 24.4834 14.2056  30
   8  -2   1 23.4433 13.4319  28
  -8   2   0-9.50037 12.1296  35
   8   2   0 24.9334 11.6825  28
   8  -2   0 8.33593 12.5994  28
   8   2  -1 1.02548 11.1527  28
   8  -2  -1 19.0229 12.8347  28
  -8   2   2 147.189 16.5958  32
   8   2  -2 152.232 16.0326  28
  -8   2   3 181.149 17.4095  32
   8   2  -3 188.843 16.9247  28
  -8   2   4 347.418 22.7777  32
   8   2  -4 405.244 23.2842  28
  -8   2   5 80.1764 13.0193  32
   8   2  -5 82.9225 13.8764  28
  -8   2   6 154.363 14.1820  32
   8   2  -6 138.874 14.7201  28
   8   2  -7 2.72038 9.24428  33
  -8   2   7 4.88749 8.44137  32
   8   2  -7 18.9948 11.1016  28
   8   2  -8 1.66883 9.20294  33
  -8   3  -5 32.0314 9.65157  35
   8  -3   5 35.3748 10.9187  30
   8  -3   5 30.9393 9.71119  28
  -8   3  -4 62.3872 11.0006  35
   8  -3   4 59.8805 12.0397  30
  -8   3  -3 33.8274 11.0003  35
   8  -3   3 34.6502 11.9969  30
   8  -3   3 6.83192 10.1563  28
  -8   3  -2 186.488 15.3774  35
   8  -3   2 187.091 17.6578  30
   8  -3   2 195.251 15.9873  28
  -8   3  -1 89.5299 12.4367  35
   8  -3   1 89.2862 12.3777  28
  -8   3   0 144.960 13.8354  35
  -8   3   1 71.3395 11.6354  35
  -8   3   1 50.2421 11.1738  32
  -8   3   2 125.821 13.5900  32
   8   3  -2 181.620 13.6244  28
  -8   3   3 21.7452 9.05604  32
  -8   3   4 48.7852 9.76721  32
   9   0   0 2.83119 8.66208  28
   9   0  -1 3.59184 8.90886  28
   0   0   0    0.00    0.00   0
;
_shelx_hkl_checksum                24494
_olex2_submission_special_instructions  'No special instructions were received'
_oxdiff_exptl_absorpt_empirical_details
;
Empirical correction (ABSPACK) includes:
- Absorption correction using spherical harmonics
- Frame scaling
;
_oxdiff_exptl_absorpt_empirical_full_max  1.999
_oxdiff_exptl_absorpt_empirical_full_min  0.715
loop_
  _twin_individual_id
  _twin_individual_mass_fraction_refined
 1 0.569(6)
 2 0.431(6)
