# Supplementary material
Source: MDPI journal article supplement (https://www.mdpi.com/2075-163X/9/6/373)
Supplement: s1 [file s1 › UAD_-50_last.cif]

data_UAD_-50_uracdih_223k
_audit_creation_date               2019-04-30
_audit_creation_method
;
Olex2 1.2
(compiled 2018.05.29 svn.r3508 for OlexSys, GUI svn.r5506)
;
_shelx_SHELXL_version_number       '2018/3'
_audit_contact_author_address      ?
_audit_contact_author_email        ?
_audit_contact_author_name         ''
_audit_contact_author_phone        ?
_publ_contact_author_id_orcid      ?
_publ_section_references
;
Dolomanov, O.V., Bourhis, L.J., Gildea, R.J, Howard, J.A.K. & Puschmann, H.
 (2009), J. Appl. Cryst. 42, 339-341.

Sheldrick, G.M. (2015). Acta Cryst. C71, 3-8.
;
_chemical_name_common              ?
_chemical_name_systematic          ?
_chemical_formula_moiety           'C5 H4 N4 O3, 2(H2 O)'
_chemical_formula_sum              'C5 H8 N4 O5'
_chemical_formula_weight           204.15
_chemical_melting_point            ?

loop_
  _atom_type_symbol
  _atom_type_description
  _atom_type_scat_dispersion_real
  _atom_type_scat_dispersion_imag
  _atom_type_scat_source
 'C' 'C' 0.0181 0.0091 'International Tables Vol C Tables 4.2.6.8 and 6.1.1.4'
 'H' 'H' 0.0000 0.0000 'International Tables Vol C Tables 4.2.6.8 and 6.1.1.4'
 'N' 'N' 0.0311 0.0180 'International Tables Vol C Tables 4.2.6.8 and 6.1.1.4'
 'O' 'O' 0.0492 0.0322 'International Tables Vol C Tables 4.2.6.8 and 6.1.1.4'

_shelx_space_group_comment
;
The symmetry employed for this shelxl refinement is uniquely defined
by the following loop, which should always be used as a source of
symmetry information in preference to the above space-group names.
They are only intended as comments.
;
_space_group_crystal_system        'monoclinic'
_space_group_IT_number             14
_space_group_name_H-M_alt          'P 1 21/c 1'
_space_group_name_Hall             '-P 2ybc'
loop_
  _space_group_symop_operation_xyz
 'x, y, z'
 '-x, y+1/2, -z+1/2'
 '-x, -y, -z'
 'x, -y-1/2, z-1/2'

_cell_length_a                     7.3553(4)
_cell_length_b                     6.3485(3)
_cell_length_c                     17.5125(9)
_cell_angle_alpha                  90
_cell_angle_beta                   90.005(5)
_cell_angle_gamma                  90
_cell_volume                       817.75(7)
_cell_formula_units_Z              4
_cell_measurement_reflns_used      1309
_cell_measurement_temperature      223(2)
_cell_measurement_theta_max        69.2050
_cell_measurement_theta_min        5.0320
_shelx_estimated_absorpt_T_max     ?
_shelx_estimated_absorpt_T_min     ?
_exptl_absorpt_coefficient_mu      1.304
_exptl_absorpt_correction_T_max    1.00000
_exptl_absorpt_correction_T_min    0.46280
_exptl_absorpt_correction_type     multi-scan
_exptl_absorpt_process_details
;
CrysAlisPro 1.171.39.44a (Rigaku Oxford Diffraction, 2018)
Empirical absorption correction using spherical harmonics,
 implemented in SCALE3 ABSPACK scaling algorithm.
;
_exptl_absorpt_special_details     ?
_exptl_crystal_colour              'translucent colorless'
_exptl_crystal_density_diffrn      1.658
_exptl_crystal_density_meas        ?
_exptl_crystal_density_method      ?
_exptl_crystal_description         'prism'
_exptl_crystal_F_000               424
_exptl_crystal_size_max            0.077
_exptl_crystal_size_mid            0.058
_exptl_crystal_size_min            0.022
_exptl_transmission_factor_max     ?
_exptl_transmission_factor_min     ?
_diffrn_reflns_av_R_equivalents    0.0272
_diffrn_reflns_av_unetI/netI       0.0505
_diffrn_reflns_Laue_measured_fraction_full  0.995
_diffrn_reflns_Laue_measured_fraction_max  0.993
_diffrn_reflns_limit_h_max         8
_diffrn_reflns_limit_h_min         -8
_diffrn_reflns_limit_k_max         6
_diffrn_reflns_limit_k_min         -7
_diffrn_reflns_limit_l_max         20
_diffrn_reflns_limit_l_min         -21
_diffrn_reflns_number              4215
_diffrn_reflns_point_group_measured_fraction_full  0.995
_diffrn_reflns_point_group_measured_fraction_max  0.993
_diffrn_reflns_theta_full          67.684
_diffrn_reflns_theta_max           69.786
_diffrn_reflns_theta_min           2.523
_diffrn_ambient_environment        N~2~
_diffrn_ambient_temperature        223(2)
_diffrn_detector                   'CCD plate'
_diffrn_detector_area_resol_mean   ?
_diffrn_detector_type              HyPix3000
_diffrn_measured_fraction_theta_full  0.995
_diffrn_measured_fraction_theta_max  0.993
_diffrn_measurement_details
;
List of Runs (angles in degrees, time in seconds):

  # Type    Start    End  Width  t~exp~   \w     \q     \k     \f   Frames
--------------------------------------------------------------------------
  1  \w    -69.00 -22.00   0.50    3.00    --  -38.82 122.00  29.00   94
  2  \w    -94.00 -60.00   0.50    3.00    --  -38.82 151.00-169.00   68
  3  \w   -100.00 -71.00   0.50    3.00    --  -38.82-151.00 146.00   58
  4  \w     20.00  45.00   0.50    3.00    --   38.82-122.00 -52.00   50
  5  \w     64.00  90.00   0.50    3.00    --   38.82 151.00-169.00   52
  6  \w     37.00  62.00   0.50    3.00    --   38.82-151.00 146.00   50
  7  \w     91.00 124.00   0.50    6.00    --  100.00 151.00-169.00   66
  8  \w     68.00 108.00   0.50    6.00    --  100.00-122.00 -52.00   80
  9  \w    -55.00 -29.00   0.50    3.00    --  -38.82  54.00 -60.00   52
 10  \w    -15.00  11.00   0.50    3.00    --  -38.82 104.00 150.00   52
 11  \w    -73.00 -31.00   0.50    3.00    --  -38.82 104.00 150.00   84
 12  \w     -5.00  26.00   0.50    3.00    --  -38.82  54.00 -60.00   62
 13  \w     78.00 104.00   0.50    3.00    --   38.82  32.00  30.00   52
 14  \w    -24.00   5.00   0.50    3.00    --   38.82 -43.00 -60.00   58
 15  \w     20.00  45.00   0.50    3.00    --   38.82 -32.00  30.00   50
 16  \w     43.00  68.00   0.50    3.00    --   38.82-104.00 -30.00   50
 17  \w     24.00  81.00   0.50    3.00    --   38.82  54.00-120.00  114
 18  \w    -27.00  10.00   0.50    3.00    --   38.82 -32.00  30.00   74
 19  \w    -14.00  32.00   0.50    3.00    --   38.82-104.00 -30.00   92
 20  \w     37.00  74.00   0.50    3.00    --   38.82  32.00  30.00   74
 21  \w     21.00  50.00   0.50    3.00    --   38.82 -43.00 -60.00   58
 22  \w     24.00  51.00   0.50    6.00    --  100.00   0.00-180.00   54
 23  \w     96.00 125.00   0.50    6.00    --  100.00 -69.00-120.00   58
 24  \w    116.00 141.00   0.50    6.00    --  100.00  30.00 -90.00   50
 25  \w     89.00 156.00   0.50    6.00    --  100.00 133.00-180.00  134
 26  \w     34.00  80.00   0.50    6.00    --  100.00 -69.00-120.00   92
 27  \w    109.00 135.00   0.50    6.00    --  100.00 111.00-120.00   52
 28  \w     71.00 132.00   0.50    6.00    --  100.00  15.00-150.00  122
 29  \w     84.00 152.00   0.50    6.00    --  100.00  61.00-120.00  136
 30  \w     93.00 143.00   0.50    6.00    --  100.00  37.00 150.00  100
 31  \w     56.00 103.00   0.50    6.00    --  100.00 -61.00-180.00   94
 32  \w     36.00  90.00   0.50    6.00    --  100.00 -37.00 120.00  108
 33  \w     98.00 123.00   0.50    6.00    --  100.00  45.00-150.00   50
 34  \w     31.00 109.00   0.50    6.00    --  100.00 -86.00 120.00  156
 35  \w     71.00 128.00   0.50    6.00    --  100.00 133.00 -90.00  114
 36  \w     88.00 157.00   0.50    6.00    --  100.00  93.00   0.00  138
 37  \w     81.00 107.00   0.50    6.00    --  100.00 111.00-120.00   52
 38  \w     78.00 103.00   0.50    6.00    --  100.00   0.00-180.00   50
 39  \w     77.00 124.00   0.50    6.00    --  100.00  69.00 -60.00   94
;
_diffrn_measurement_device         'four-circle diffractometer'
_diffrn_measurement_device_type   
 'SuperNova, Single source at offset/far, HyPix3000'
_diffrn_measurement_method         '\w scans'
_diffrn_orient_matrix_type        
 'CrysAlisPro convention (1999,Acta A55,543-557)'
_diffrn_orient_matrix_UB_11        0.2043491000
_diffrn_orient_matrix_UB_12        -0.0520776000
_diffrn_orient_matrix_UB_13        0.0040366000
_diffrn_orient_matrix_UB_21        -0.0391353000
_diffrn_orient_matrix_UB_22        -0.1718791000
_diffrn_orient_matrix_UB_23        0.0598663000
_diffrn_orient_matrix_UB_31        -0.0236641000
_diffrn_orient_matrix_UB_32        -0.1632429000
_diffrn_orient_matrix_UB_33        -0.0643390000
_diffrn_radiation_monochromator    mirror
_diffrn_radiation_probe            x-ray
_diffrn_radiation_type             CuK\a
_diffrn_radiation_wavelength       1.54184
_diffrn_source                     'micro-focus sealed X-ray tube'
_diffrn_source_type                'SuperNova (Cu) X-ray Source'
_reflns_Friedel_coverage           0.000
_reflns_Friedel_fraction_full      .
_reflns_Friedel_fraction_max       .
_reflns_number_gt                  1214
_reflns_number_total               1533
_reflns_odcompleteness_completeness  98.20
_reflns_odcompleteness_iscentric   1
_reflns_odcompleteness_theta       70.93
_reflns_special_details
;
 Reflections were merged by SHELXL according to the crystal
 class for the calculation of statistics and refinement.
 
 _reflns_Friedel_fraction is defined as the number of unique
 Friedel pairs measured divided by the number that would be
 possible theoretically, ignoring centric projections and
 systematic absences. Completness statistics refer to single and
 composite reflections containing twin component 1 only.
;
_reflns_threshold_expression       'I > 2\s(I)'
_computing_cell_refinement         'CrysAlisPro 1.171.39.44a (Rigaku OD, 2018)'
_computing_data_collection         'CrysAlisPro 1.171.39.44a (Rigaku OD, 2018)'
_computing_data_reduction          'CrysAlisPro 1.171.39.44a (Rigaku OD, 2018)'
_computing_molecular_graphics      'Olex2 (Dolomanov et al., 2009)'
_computing_publication_material    'Olex2 (Dolomanov et al., 2009)'
_computing_structure_refinement    'ShelXL (Sheldrick, 2015)'
_computing_structure_solution      'ShelXT (Sheldrick, 2015)'
_refine_diff_density_max           0.296
_refine_diff_density_min           -0.196
_refine_diff_density_rms           0.058
_refine_ls_extinction_coef         0.0021(3)
_refine_ls_extinction_expression  
 'Fc^*^=kFc[1+0.001xFc^2^\l^3^/sin(2\q)]^-1/4^'
_refine_ls_extinction_method       'SHELXL-2018/3 (Sheldrick 2018)'
_refine_ls_goodness_of_fit_ref     1.044
_refine_ls_hydrogen_treatment      mixed
_refine_ls_matrix_type             full
_refine_ls_number_parameters       166
_refine_ls_number_reflns           1533
_refine_ls_number_restraints       5
_refine_ls_R_factor_all            0.0618
_refine_ls_R_factor_gt             0.0500
_refine_ls_restrained_S_all        1.043
_refine_ls_shift/su_max            0.000
_refine_ls_shift/su_mean           0.000
_refine_ls_structure_factor_coef   Fsqd
_refine_ls_weighting_details      
 'w=1/[\s^2^(Fo^2^)+(0.0875P)^2^] where P=(Fo^2^+2Fc^2^)/3'
_refine_ls_weighting_scheme        calc
_refine_ls_wR_factor_gt            0.1340
_refine_ls_wR_factor_ref           0.1441
_refine_special_details
;
 Refined as a 2-component twin.
;
_olex2_refinement_description
;
1. Twinned data refinement
 Scales: 0.563(6)
 0.437(6)
2. Fixed Uiso
 At 1.2 times of:
  All N(H) groups
 At 1.5 times of:
  All O(H,H) groups
3. Restrained distances
 OW1-HW1A = OW1-HW1B
 0.95 with sigma of 0.02
 OW2-HW2A = OW2-HW2B
 0.95 with sigma of 0.02
 O3B-HW1A
 1.65 with sigma of 0.02
4. Uiso/Uaniso restraints and constraints
Uanis(C1A) = Uanis(C1B)
Uanis(C2A) = Uanis(C2B) = Uanis(C3A) = Uanis(C3B)
Uanis(C4A) = Uanis(C4B)
Uanis(C5A) = Uanis(C5B)
Uanis(N1A) = Uanis(N1B) = Uanis(N3A) = Uanis(N3B)
Uanis(N2A) = Uanis(N2B)
Uanis(N4A) = Uanis(N4B)
Uanis(O1A) = Uanis(O1B)
Uanis(O2A) = Uanis(O2B)
Uanis(O3A) = Uanis(O3B)
5. Others
 Sof(C1B)=Sof(C2B)=Sof(C3B)=Sof(C4B)=Sof(C5B)=Sof(N1B)=Sof(H1B)=Sof(N2B)=
 Sof(H2B)=Sof(N3B)=Sof(H3B)=Sof(N4B)=Sof(H4B)=Sof(O1B)=Sof(O2B)=Sof(O3B)=1-
 FVAR(1)
 Sof(C1A)=Sof(C2A)=Sof(C3A)=Sof(C4A)=Sof(C5A)=Sof(N1A)=Sof(H1A)=Sof(N2A)=
 Sof(H2A)=Sof(N3A)=Sof(H3A)=Sof(N4A)=Sof(H4A)=Sof(O1A)=Sof(O2A)=Sof(O3A)=FVAR(1)
6.a Aromatic/amide H refined with riding coordinates:
 N1A(H1A), N2A(H2A), N3A(H3A), N4A(H4A), N1B(H1B), N2B(H2B), N3B(H3B), N4B(H4B)
;
_atom_sites_solution_hydrogens     mixed
_atom_sites_solution_primary       ?
_atom_sites_solution_secondary     ?
loop_
  _atom_site_label
  _atom_site_type_symbol
  _atom_site_fract_x
  _atom_site_fract_y
  _atom_site_fract_z
  _atom_site_U_iso_or_equiv
  _atom_site_adp_type
  _atom_site_occupancy
  _atom_site_site_symmetry_order
  _atom_site_calc_flag
  _atom_site_refinement_flags_posn
  _atom_site_refinement_flags_adp
  _atom_site_refinement_flags_occupancy
  _atom_site_disorder_assembly
  _atom_site_disorder_group
 C1A C 0.1104(12) 0.2094(15) -0.4269(5) 0.0355(13) Uani 0.597(4) 1 d . . P A 1
 C2A C 0.2640(8) 0.5294(8) -0.4000(6) 0.0332(5) Uani 0.597(4) 1 d . . P A 1
 C3A C 0.2855(7) 0.5691(7) -0.4772(3) 0.0332(5) Uani 0.597(4) 1 d . . P A 1
 C4A C 0.2208(8) 0.4309(8) -0.5342(3) 0.0336(6) Uani 0.597(4) 1 d . . P A 1
 C5A C 0.4053(13) 0.8348(16) -0.4105(6) 0.0371(12) Uani 0.597(4) 1 d . . P A 1
 N1A N 0.1392(11) 0.2513(11) -0.5020(3) 0.0331(10) Uani 0.597(4) 1 d . . P A 1
 H1A H 0.103157 0.156648 -0.533688 0.040 Uiso 0.597(4) 1 calc R . P A 1
 N2A N 0.1770(11) 0.3501(12) -0.3759(4) 0.0400(11) Uani 0.597(4) 1 d . . P A 1
 H2A H 0.164628 0.326773 -0.327847 0.048 Uiso 0.597(4) 1 calc R . P A 1
 N3A N 0.3736(11) 0.7616(11) -0.4812(4) 0.0331(10) Uani 0.597(4) 1 d . . P A 1
 H3A H 0.403565 0.824904 -0.522805 0.040 Uiso 0.597(4) 1 calc R . P A 1
 N4A N 0.3337(11) 0.6847(10) -0.3594(4) 0.0349(9) Uani 0.597(4) 1 d . . P A 1
 H4A H 0.335199 0.692967 -0.310381 0.042 Uiso 0.597(4) 1 calc R . P A 1
 O1A O 0.0302(11) 0.0508(11) -0.4021(6) 0.0475(13) Uani 0.597(4) 1 d . . P A 1
 O2A O 0.2336(6) 0.4514(7) -0.6029(3) 0.0444(7) Uani 0.597(4) 1 d . . P A 1
 O3A O 0.4882(9) 0.9963(13) -0.3924(4) 0.0503(12) Uani 0.597(4) 1 d . . P A 1
 C1B C 0.389(2) 0.793(2) -0.4268(10) 0.0355(13) Uani 0.403(4) 1 d . . P A 2
 C2B C 0.2392(13) 0.4758(13) -0.4028(9) 0.0332(5) Uani 0.403(4) 1 d . . P A 2
 C3B C 0.2192(10) 0.4286(11) -0.4763(4) 0.0332(5) Uani 0.403(4) 1 d . . P A 2
 C4B C 0.2792(11) 0.5666(12) -0.5323(4) 0.0336(6) Uani 0.403(4) 1 d . . P A 2
 C5B C 0.0884(18) 0.174(3) -0.4084(10) 0.0371(12) Uani 0.403(4) 1 d . . P A 2
 N1B N 0.3639(18) 0.7454(18) -0.5031(6) 0.0331(10) Uani 0.403(4) 1 d . . P A 2
 H1B H 0.404701 0.834924 -0.535738 0.040 Uiso 0.403(4) 1 calc R . P A 2
 N2B N 0.3239(18) 0.6500(18) -0.3770(6) 0.0400(11) Uani 0.403(4) 1 d . . P A 2
 H2B H 0.336506 0.669932 -0.328679 0.048 Uiso 0.403(4) 1 calc R . P A 2
 N3B N 0.1236(17) 0.2395(16) -0.4794(6) 0.0331(10) Uani 0.403(4) 1 d . . P A 2
 H3B H 0.092028 0.175069 -0.520481 0.040 Uiso 0.403(4) 1 calc R . P A 2
 N4B N 0.1605(17) 0.3237(17) -0.3578(6) 0.0349(9) Uani 0.403(4) 1 d . . P A 2
 H4B H 0.156278 0.321029 -0.308696 0.042 Uiso 0.403(4) 1 calc R . P A 2
 O1B O 0.4699(15) 0.958(2) -0.4082(6) 0.0475(13) Uani 0.403(4) 1 d . . P A 2
 O2B O 0.2700(10) 0.5465(11) -0.6042(5) 0.0444(7) Uani 0.403(4) 1 d . . P A 2
 O3B O 0.006(2) 0.004(2) -0.3952(9) 0.0503(12) Uani 0.403(4) 1 d D . P A 2
 OW1 O -0.0918(6) -0.2264(5) -0.27999(16) 0.0884(12) Uani 1 1 d D . . . .
 HW1A H -0.072(8) -0.119(6) -0.318(2) 0.133 Uiso 1 1 d DR . . . .
 HW1B H -0.178(6) -0.298(8) -0.310(3) 0.133 Uiso 1 1 d DR . . . .
 OW2 O 0.4011(6) 0.7466(6) -0.21779(16) 0.0921(12) Uani 1 1 d D . . . .
 HW2A H 0.343(8) 0.798(9) -0.174(2) 0.138 Uiso 1 1 d DR . . . .
 HW2B H 0.461(8) 0.633(6) -0.194(3) 0.138 Uiso 1 1 d DR . . . .

loop_
  _atom_site_aniso_label
  _atom_site_aniso_U_11
  _atom_site_aniso_U_22
  _atom_site_aniso_U_33
  _atom_site_aniso_U_23
  _atom_site_aniso_U_13
  _atom_site_aniso_U_12
 C1A 0.045(2) 0.031(3) 0.030(5) 0.005(2) 0.004(3) -0.0011(19)
 C2A 0.0382(11) 0.0276(12) 0.0338(10) -0.003(2) 0.0012(18) -0.0001(8)
 C3A 0.0382(11) 0.0276(12) 0.0338(10) -0.003(2) 0.0012(18) -0.0001(8)
 C4A 0.0366(12) 0.0309(14) 0.0332(12) 0.001(2) 0.002(2) 0.0005(10)
 C5A 0.043(2) 0.041(4) 0.027(4) -0.001(3) 0.001(3) 0.002(3)
 N1A 0.0446(8) 0.0315(8) 0.023(3) -0.0015(18) 0.003(2) -0.0049(6)
 N2A 0.0536(18) 0.047(2) 0.019(3) 0.001(2) 0.001(3) -0.0011(16)
 N3A 0.0446(8) 0.0315(8) 0.023(3) -0.0015(18) 0.003(2) -0.0049(6)
 N4A 0.0479(17) 0.0356(19) 0.021(3) -0.0042(18) 0.004(2) 0.0002(13)
 O1A 0.060(2) 0.042(4) 0.041(2) -0.009(3) -0.001(3) -0.016(2)
 O2A 0.0613(16) 0.0424(19) 0.0296(9) -0.003(2) -0.002(2) -0.0084(16)
 O3A 0.067(2) 0.042(3) 0.043(2) -0.0086(18) -0.006(2) -0.015(2)
 C1B 0.045(2) 0.031(3) 0.030(5) 0.005(2) 0.004(3) -0.0011(19)
 C2B 0.0382(11) 0.0276(12) 0.0338(10) -0.003(2) 0.0012(18) -0.0001(8)
 C3B 0.0382(11) 0.0276(12) 0.0338(10) -0.003(2) 0.0012(18) -0.0001(8)
 C4B 0.0366(12) 0.0309(14) 0.0332(12) 0.001(2) 0.002(2) 0.0005(10)
 C5B 0.043(2) 0.041(4) 0.027(4) -0.001(3) 0.001(3) 0.002(3)
 N1B 0.0446(8) 0.0315(8) 0.023(3) -0.0015(18) 0.003(2) -0.0049(6)
 N2B 0.0536(18) 0.047(2) 0.019(3) 0.001(2) 0.001(3) -0.0011(16)
 N3B 0.0446(8) 0.0315(8) 0.023(3) -0.0015(18) 0.003(2) -0.0049(6)
 N4B 0.0479(17) 0.0356(19) 0.021(3) -0.0042(18) 0.004(2) 0.0002(13)
 O1B 0.060(2) 0.042(4) 0.041(2) -0.009(3) -0.001(3) -0.016(2)
 O2B 0.0613(16) 0.0424(19) 0.0296(9) -0.003(2) -0.002(2) -0.0084(16)
 O3B 0.067(2) 0.042(3) 0.043(2) -0.0086(18) -0.006(2) -0.015(2)
 OW1 0.110(3) 0.100(2) 0.0545(15) 0.0045(16) 0.008(2) -0.013(2)
 OW2 0.119(4) 0.102(2) 0.0549(15) 0.0093(16) -0.009(2) 0.016(2)

_geom_special_details
;
 All esds (except the esd in the dihedral angle between two l.s. planes)
 are estimated using the full covariance matrix.  The cell esds are taken
 into account individually in the estimation of esds in distances, angles
 and torsion angles; correlations between esds in cell parameters are only
 used when they are defined by crystal symmetry.  An approximate (isotropic)
 treatment of cell esds is used for estimating esds involving l.s. planes.
;
loop_
  _geom_bond_atom_site_label_1
  _geom_bond_atom_site_label_2
  _geom_bond_distance
  _geom_bond_site_symmetry_2
  _geom_bond_publ_flag
 C1A N1A 1.358(7) . ?
 C1A N2A 1.355(16) . ?
 C1A O1A 1.245(9) . ?
 C2A C3A 1.385(12) . ?
 C2A N2A 1.372(9) . ?
 C2A N4A 1.320(9) . ?
 C3A C4A 1.411(7) . ?
 C3A N3A 1.385(9) . ?
 C4A N1A 1.406(8) . ?
 C4A O2A 1.215(7) . ?
 C5A N3A 1.343(8) . ?
 C5A N4A 1.409(17) . ?
 C5A O3A 1.235(12) . ?
 N1A H1A 0.8600 . ?
 N2A H2A 0.8600 . ?
 N3A H3A 0.8600 . ?
 N4A H4A 0.8600 . ?
 C1B N1B 1.382(14) . ?
 C1B N2B 1.35(3) . ?
 C1B O1B 1.251(17) . ?
 C2B C3B 1.330(18) . ?
 C2B N2B 1.348(13) . ?
 C2B N4B 1.375(14) . ?
 C3B C4B 1.386(10) . ?
 C3B N3B 1.393(13) . ?
 C4B N1B 1.391(13) . ?
 C4B O2B 1.267(11) . ?
 C5B N3B 1.337(13) . ?
 C5B N4B 1.41(3) . ?
 C5B O3B 1.256(16) . ?
 N1B H1B 0.8600 . ?
 N2B H2B 0.8600 . ?
 N3B H3B 0.8600 . ?
 N4B H4B 0.8600 . ?
 OW1 HW1A 0.960(17) . ?
 OW1 HW1B 0.94(2) . ?
 OW2 HW2A 0.94(2) . ?
 OW2 HW2B 0.94(2) . ?

loop_
  _geom_angle_atom_site_label_1
  _geom_angle_atom_site_label_2
  _geom_angle_atom_site_label_3
  _geom_angle
  _geom_angle_site_symmetry_1
  _geom_angle_site_symmetry_3
  _geom_angle_publ_flag
 N2A C1A N1A 116.9(7) . . ?
 O1A C1A N1A 124.7(10) . . ?
 O1A C1A N2A 118.4(7) . . ?
 N2A C2A C3A 120.3(7) . . ?
 N4A C2A C3A 110.2(6) . . ?
 N4A C2A N2A 129.5(9) . . ?
 C2A C3A C4A 122.6(5) . . ?
 C2A C3A N3A 105.3(5) . . ?
 N3A C3A C4A 132.1(5) . . ?
 N1A C4A C3A 111.4(4) . . ?
 O2A C4A C3A 127.4(6) . . ?
 O2A C4A N1A 121.1(6) . . ?
 N3A C5A N4A 106.7(7) . . ?
 O3A C5A N3A 127.6(12) . . ?
 O3A C5A N4A 125.7(8) . . ?
 C1A N1A C4A 127.8(7) . . ?
 C1A N1A H1A 116.1 . . ?
 C4A N1A H1A 116.1 . . ?
 C1A N2A C2A 120.9(7) . . ?
 C1A N2A H2A 119.6 . . ?
 C2A N2A H2A 119.6 . . ?
 C3A N3A H3A 125.1 . . ?
 C5A N3A C3A 109.8(8) . . ?
 C5A N3A H3A 125.1 . . ?
 C2A N4A C5A 107.9(6) . . ?
 C2A N4A H4A 126.0 . . ?
 C5A N4A H4A 126.0 . . ?
 N2B C1B N1B 115.6(11) . . ?
 O1B C1B N1B 119.9(17) . . ?
 O1B C1B N2B 124.4(14) . . ?
 C3B C2B N2B 124.1(12) . . ?
 C3B C2B N4B 110.6(9) . . ?
 N2B C2B N4B 125.3(13) . . ?
 C2B C3B C4B 120.4(8) . . ?
 C2B C3B N3B 106.6(8) . . ?
 C4B C3B N3B 132.8(8) . . ?
 C3B C4B N1B 113.5(7) . . ?
 O2B C4B C3B 128.4(8) . . ?
 O2B C4B N1B 118.1(9) . . ?
 N3B C5B N4B 107.5(12) . . ?
 O3B C5B N3B 122.2(18) . . ?
 O3B C5B N4B 130.3(15) . . ?
 C1B N1B C4B 126.3(12) . . ?
 C1B N1B H1B 116.8 . . ?
 C4B N1B H1B 116.8 . . ?
 C1B N2B C2B 119.9(11) . . ?
 C1B N2B H2B 120.0 . . ?
 C2B N2B H2B 120.0 . . ?
 C3B N3B H3B 125.3 . . ?
 C5B N3B C3B 109.4(11) . . ?
 C5B N3B H3B 125.3 . . ?
 C2B N4B C5B 105.8(10) . . ?
 C2B N4B H4B 127.1 . . ?
 C5B N4B H4B 127.1 . . ?
 HW1A OW1 HW1B 93(4) . . ?
 HW2A OW2 HW2B 96(5) . . ?

loop_
  _geom_hbond_atom_site_label_D
  _geom_hbond_atom_site_label_H
  _geom_hbond_atom_site_label_A
  _geom_hbond_distance_DH
  _geom_hbond_distance_HA
  _geom_hbond_distance_DA
  _geom_hbond_angle_DHA
  _geom_hbond_site_symmetry_A
  _geom_hbond_publ_flag
 N1A H1A O1A 0.86 1.99 2.837(12) 168.2 3_554 yes
 N2A H2A OW1 0.86 1.99 2.844(6) 170.5 2_554 yes
 N3A H3A O3A 0.86 2.03 2.879(13) 168.5 3_674 yes
 N4A H4A OW2 0.86 1.73 2.559(7) 162.4 . yes
 N1B H1B O1B 0.86 1.88 2.73(2) 168.3 3_674 yes
 N2B H2B OW2 0.86 2.06 2.910(10) 171.0 . yes
 N3B H3B O3B 0.86 2.00 2.85(2) 170.6 3_554 yes
 N4B H4B OW1 0.86 1.65 2.485(10) 162.5 2_554 yes
 OW1 HW1A O1A 0.960(17) 1.978(19) 2.912(7) 164(4) . yes
 OW1 HW1A O3B 0.960(17) 1.668(17) 2.594(10) 161(4) . yes
 OW1 HW1B O2A 0.94(2) 1.85(4) 2.708(5) 150(5) 3_554 yes
 OW1 HW1B O2B 0.94(2) 2.28(3) 3.157(8) 155(5) 3_554 yes
 OW2 HW2A O2A 0.94(2) 2.17(3) 3.040(6) 153(5) 4_576 yes
 OW2 HW2A O2B 0.94(2) 1.65(3) 2.572(8) 163(6) 4_576 yes
 OW2 HW2B O3A 0.94(2) 1.78(4) 2.629(6) 148(6) 2_644 yes
 OW2 HW2B O1B 0.94(2) 2.16(4) 3.019(10) 151(5) 2_644 yes

loop_
  _geom_torsion_atom_site_label_1
  _geom_torsion_atom_site_label_2
  _geom_torsion_atom_site_label_3
  _geom_torsion_atom_site_label_4
  _geom_torsion
  _geom_torsion_site_symmetry_1
  _geom_torsion_site_symmetry_2
  _geom_torsion_site_symmetry_3
  _geom_torsion_site_symmetry_4
  _geom_torsion_publ_flag
 C2A C3A C4A N1A -1.6(8) . . . . ?
 C2A C3A C4A O2A -179.7(6) . . . . ?
 C2A C3A N3A C5A 0.4(8) . . . . ?
 C3A C2A N2A C1A -0.2(10) . . . . ?
 C3A C2A N4A C5A -0.1(8) . . . . ?
 C3A C4A N1A C1A 3.9(11) . . . . ?
 C4A C3A N3A C5A 179.0(6) . . . . ?
 N1A C1A N2A C2A 2.1(11) . . . . ?
 N2A C1A N1A C4A -4.3(13) . . . . ?
 N2A C2A C3A C4A 0.0(8) . . . . ?
 N2A C2A C3A N3A 178.7(7) . . . . ?
 N2A C2A N4A C5A -178.9(8) . . . . ?
 N3A C3A C4A N1A -180.0(5) . . . . ?
 N3A C3A C4A O2A 2.0(11) . . . . ?
 N3A C5A N4A C2A 0.4(9) . . . . ?
 N4A C2A C3A C4A -178.9(5) . . . . ?
 N4A C2A C3A N3A -0.2(7) . . . . ?
 N4A C2A N2A C1A 178.5(8) . . . . ?
 N4A C5A N3A C3A -0.5(9) . . . . ?
 O1A C1A N1A C4A 176.8(8) . . . . ?
 O1A C1A N2A C2A -178.9(8) . . . . ?
 O2A C4A N1A C1A -177.9(7) . . . . ?
 O3A C5A N3A C3A 176.4(7) . . . . ?
 O3A C5A N4A C2A -176.6(7) . . . . ?
 C2B C3B C4B N1B 2.2(12) . . . . ?
 C2B C3B C4B O2B -179.7(9) . . . . ?
 C2B C3B N3B C5B -0.6(13) . . . . ?
 C3B C2B N2B C1B 2.4(18) . . . . ?
 C3B C2B N4B C5B 0.2(12) . . . . ?
 C3B C4B N1B C1B -0.7(18) . . . . ?
 C4B C3B N3B C5B -176.0(9) . . . . ?
 N1B C1B N2B C2B -0.8(19) . . . . ?
 N2B C1B N1B C4B 0(2) . . . . ?
 N2B C2B C3B C4B -3.2(15) . . . . ?
 N2B C2B C3B N3B -179.3(11) . . . . ?
 N2B C2B N4B C5B 179.7(12) . . . . ?
 N3B C3B C4B N1B 177.1(7) . . . . ?
 N3B C3B C4B O2B -4.7(16) . . . . ?
 N3B C5B N4B C2B -0.6(13) . . . . ?
 N4B C2B C3B C4B 176.3(7) . . . . ?
 N4B C2B C3B N3B 0.2(12) . . . . ?
 N4B C2B N2B C1B -177.0(12) . . . . ?
 N4B C5B N3B C3B 0.7(14) . . . . ?
 O1B C1B N1B C4B 179.0(11) . . . . ?
 O1B C1B N2B C2B -179.7(13) . . . . ?
 O2B C4B N1B C1B -179.1(12) . . . . ?
 O3B C5B N3B C3B -178.7(11) . . . . ?
 O3B C5B N4B C2B 178.7(13) . . . . ?

_shelx_res_file
;
TITL UrAcDih_223K in P2(1)/c
    uracdih_223k.res
    created by SHELXL-2018/3 at 01:48:50 on 30-Apr-2019
REM P2(1)/c (#14 in standard setting)
CELL 1.54184 7.355339 6.348499 17.51245 90 90.0053 90
ZERR 4 0.000386 0.000347 0.000898 0 0.005 0
LATT 1
SYMM -X,0.5+Y,0.5-Z
SFAC C H N O
UNIT 20 32 16 20
EQIV $1 -X,-Y,-1-Z
EQIV $2 -X,0.5+Y,-0.5-Z
EQIV $3 1-X,2-Y,-1-Z
EQIV $4 +X,1.5-Y,0.5+Z
EQIV $5 1-X,-0.5+Y,-0.5-Z
DFIX 0.95 OW1 HW1a OW1 HW1b
DFIX 0.95 OW2 HW2a OW2 HW2b
DFIX 1.65 O3B HW1a
EADP C1A C1B
EADP C2A C2B C3A C3B
EADP C4A C4B
EADP C5A C5B
EADP N1A N1B N3A N3B
EADP N2A N2B
EADP N4A N4B
EADP O1A O1B
EADP O2A O2B
EADP O3A O3B

L.S. 20
PLAN  20
HTAB N1A O1A_$1
HTAB N2A OW1_$2
HTAB N3A O3A_$3
HTAB N4A OW2
HTAB N1B O1B_$3
HTAB N2B OW2
HTAB N3B O3B_$1
HTAB N4B OW1_$2
HTAB OW1 O1A
HTAB OW1 O3B
HTAB OW1 O2A_$1
HTAB OW1 O2B_$1
HTAB OW2 O2A_$4
HTAB OW2 O2B_$4
HTAB OW2 O3A_$5
HTAB OW2 O1B_$5
BOND $H
Htab
conf
list 4
fmap 2 53
acta
TWIN -1 0 0 0 -1 0 0 0 1 2
OMIT -4 140
OMIT 0 2 5
OMIT -6 1 14
OMIT 1 1 0
OMIT -6 1 13
REM <olex2.extras>
REM <HklSrc "%.\\UrAcDih_223K.hkl">
REM </olex2.extras>

WGHT    0.087500
EXTI    0.002095
BASF   0.43657
FVAR       2.91126   0.59684
PART 1
C1A   1    0.110394    0.209381   -0.426910    21.00000    0.04486    0.03129 =
         0.03047    0.00495    0.00409   -0.00113
C2A   1    0.263982    0.529362   -0.400015    21.00000    0.03822    0.02763 =
         0.03379   -0.00283    0.00117   -0.00006
C3A   1    0.285505    0.569130   -0.477246    21.00000    0.03822    0.02763 =
         0.03379   -0.00283    0.00117   -0.00006
C4A   1    0.220793    0.430947   -0.534164    21.00000    0.03663    0.03091 =
         0.03323    0.00065    0.00184    0.00046
C5A   1    0.405332    0.834758   -0.410500    21.00000    0.04340    0.04123 =
         0.02681   -0.00090    0.00133    0.00238
N1A   3    0.139181    0.251337   -0.501994    21.00000    0.04458    0.03149 =
         0.02310   -0.00148    0.00281   -0.00491
AFIX  43
H1A   2    0.103157    0.156648   -0.533688    21.00000   -1.20000
AFIX   0
N2A   3    0.177016    0.350111   -0.375940    21.00000    0.05355    0.04742 =
         0.01898    0.00104    0.00060   -0.00107
AFIX  43
H2A   2    0.164628    0.326773   -0.327847    21.00000   -1.20000
AFIX   0
N3A   3    0.373625    0.761640   -0.481243    21.00000    0.04458    0.03149 =
         0.02310   -0.00148    0.00281   -0.00491
AFIX  43
H3A   2    0.403565    0.824904   -0.522805    21.00000   -1.20000
AFIX   0
N4A   3    0.333723    0.684739   -0.359394    21.00000    0.04787    0.03555 =
         0.02120   -0.00425    0.00405    0.00021
AFIX  43
H4A   2    0.335199    0.692967   -0.310381    21.00000   -1.20000
AFIX   0
O1A   4    0.030165    0.050822   -0.402134    21.00000    0.05959    0.04152 =
         0.04125   -0.00866   -0.00104   -0.01588
O2A   4    0.233646    0.451447   -0.602923    21.00000    0.06130    0.04243 =
         0.02960   -0.00260   -0.00238   -0.00840
O3A   4    0.488238    0.996303   -0.392405    21.00000    0.06661    0.04161 =
         0.04278   -0.00864   -0.00645   -0.01453
PART 0
PART 2
C1B   1    0.388876    0.792910   -0.426798   -21.00000    0.04486    0.03129 =
         0.03047    0.00495    0.00409   -0.00113
C2B   1    0.239188    0.475776   -0.402831   -21.00000    0.03822    0.02763 =
         0.03379   -0.00283    0.00117   -0.00006
C3B   1    0.219185    0.428628   -0.476350   -21.00000    0.03822    0.02763 =
         0.03379   -0.00283    0.00117   -0.00006
C4B   1    0.279249    0.566627   -0.532270   -21.00000    0.03663    0.03091 =
         0.03323    0.00065    0.00184    0.00046
C5B   1    0.088398    0.173631   -0.408390   -21.00000    0.04340    0.04123 =
         0.02681   -0.00090    0.00133    0.00238
N1B   3    0.363930    0.745359   -0.503119   -21.00000    0.04458    0.03149 =
         0.02310   -0.00148    0.00281   -0.00491
AFIX  43
H1B   2    0.404701    0.834924   -0.535738   -21.00000   -1.20000
AFIX   0
N2B   3    0.323940    0.650049   -0.376968   -21.00000    0.05355    0.04742 =
         0.01898    0.00104    0.00060   -0.00107
AFIX  43
H2B   2    0.336506    0.669932   -0.328679   -21.00000   -1.20000
AFIX   0
N3B   3    0.123555    0.239480   -0.479357   -21.00000    0.04458    0.03149 =
         0.02310   -0.00148    0.00281   -0.00491
AFIX  43
H3B   2    0.092028    0.175069   -0.520481   -21.00000   -1.20000
AFIX   0
N4B   3    0.160509    0.323740   -0.357761   -21.00000    0.04787    0.03555 =
         0.02120   -0.00425    0.00405    0.00021
AFIX  43
H4B   2    0.156278    0.321029   -0.308696   -21.00000   -1.20000
AFIX   0
O1B   4    0.469865    0.958320   -0.408158   -21.00000    0.05959    0.04152 =
         0.04125   -0.00866   -0.00104   -0.01588
O2B   4    0.270021    0.546488   -0.604157   -21.00000    0.06130    0.04243 =
         0.02960   -0.00260   -0.00238   -0.00840
O3B   4    0.006169    0.004105   -0.395169   -21.00000    0.06661    0.04161 =
         0.04278   -0.00864   -0.00645   -0.01453
PART 0
OW1   4   -0.091793   -0.226405   -0.279990    11.00000    0.11022    0.10046 =
         0.05454    0.00446    0.00790   -0.01340
HW1A  2   -0.071663   -0.118920   -0.317651    11.00000   -1.50000
HW1B  2   -0.177992   -0.298203   -0.310294    11.00000   -1.50000
OW2   4    0.401147    0.746561   -0.217789    11.00000    0.11936    0.10198 =
         0.05494    0.00929   -0.00945    0.01560
HW2A  2    0.343195    0.798455   -0.173563    11.00000   -1.50000
HW2B  2    0.460550    0.633376   -0.193694    11.00000   -1.50000
HKLF 4


REM  UrAcDih_223K in P2(1)/c
REM wR2 = 0.1441, GooF = S = 1.044, Restrained GooF = 1.043 for all data
REM R1 = 0.0500 for 1214 Fo > 4sig(Fo) and 0.0618 for all 1533 data
REM 166 parameters refined using 5 restraints

END

WGHT      0.0876      0.0000

REM Instructions for potential hydrogen bonds
HTAB N1A O1A_$1
HTAB N2A OW1_$2
HTAB N3A O3A_$3
HTAB N4A OW2
HTAB N1B O1B_$3
HTAB N2B OW2
HTAB N3B O3B_$1
HTAB N4B OW1_$2
HTAB OW1 O1A
HTAB OW1 O3B
HTAB OW1 O2A_$1
HTAB OW1 O2B_$1
HTAB OW2 O2A_$4
HTAB OW2 O2B_$4
HTAB OW2 O3A_$5
HTAB OW2 O1B_$5

REM Highest difference peak  0.296,  deepest hole -0.196,  1-sigma level  0.058
Q1    1  -0.2029 -0.1603 -0.2843  11.00000  0.05    0.30
Q2    1   0.3093  0.6437 -0.2160  11.00000  0.05    0.27
Q3    1   0.4801  0.8982 -0.5365  11.00000  0.05    0.22
Q4    1   0.4992  0.9560 -0.4647  11.00000  0.05    0.19
Q5    1   0.2395  0.5177 -0.6529  11.00000  0.05    0.19
Q6    1   0.0047  0.0176 -0.4471  11.00000  0.05    0.17
Q7    1  -0.0945 -0.3189 -0.2283  11.00000  0.05    0.17
Q8    1   0.0191  0.0602 -0.5388  11.00000  0.05    0.17
Q9    1   0.3535  0.6552 -0.5990  11.00000  0.05    0.17
Q10   1   0.4033  0.7437 -0.2732  11.00000  0.05    0.16
Q11   1   0.1719  0.2350 -0.2633  11.00000  0.05    0.16
Q12   1   0.1697  0.3005 -0.5927  11.00000  0.05    0.15
Q13   1   0.3406  0.6670 -0.2716  11.00000  0.05    0.15
Q14   1   0.0925  0.1278 -0.5950  11.00000  0.05    0.15
Q15   1   0.1414  0.2860 -0.5785  11.00000  0.05    0.15
Q16   1   0.3243  0.7563 -0.2461  11.00000  0.05    0.15
Q17   1   0.0329  0.0048 -0.3480  11.00000  0.05    0.14
Q18   1   0.4112  0.8220 -0.6104  11.00000  0.05    0.14
Q19   1   0.0992  0.2045 -0.3591  11.00000  0.05    0.14
Q20   1   0.1091  0.3132 -0.2964  11.00000  0.05    0.14
;
_shelx_res_checksum                95313
_shelx_hkl_file
;
   0   0  -1 2.13394 2.33860  19
   0   0   1 4.65298 1.95534  17
   0   0  -1 4.91960 2.48389  12
   0   0  -1 2.05358 2.19400   3
   0   0  -2 47011.6 3040.41  11
   0   0   2 46921.6 3040.15  18
   0   0  -2 47077.8 3041.02  19
   0   0   2 47100.6 3040.51  17
   0   0  -2 47034.5 3040.77  12
   0   0  -2 46896.4 3040.84   3
   0   0  -3 5.25632 4.71828  11
   0   0  -3 5.54744 6.48198  19
   0   0  -3 18.2644 7.96936  12
   0   0  -3 5.30342 6.70649   3
   0   0   3 15.7355 4.56380  18
   0   0   3 3.78066 6.53293  17
   0   0  -4 6699.03 431.409  11
   0   0  -4 6586.67 432.241  12
   0   0   4 6631.42 431.682  17
   0   0  -4 6708.94 432.298   3
   0   0  -4 6541.16 432.831  19
   0   0  -5 18.0400 11.8620  19
   0   0   5 12.0141 10.5007  17
   0   0  -5 9.94546 11.5817   3
   0   0  -6 13189.3 867.321   4
   0   0   6 13574.9 865.915  17
   0   0  -6 13285.1 867.527  19
   0   0  -6 13195.1 866.931   3
   0   0  -7-14.8045 11.9561   4
   0   0  -7 2.36795 12.1450   3
   0   0  -7 9.72948 13.8811  19
   0   0  -8 29460.2 1948.38   4
   0   0  -8 29825.1 1948.29  19
   0   0  -8 30595.0 1946.88   3
   0   0  -9 1.94019 13.8547   4
   0   0  -9 16.0136 14.5223  19
   0   0  -9-1.66323 15.1831   3
   0   0 -10 36938.8 2441.49   4
   0   0 -10 38118.2 2439.64   3
   0   0 -11 32.2865 19.6250   4
   0   0 -11-9.11141 17.8552   3
   0   0 -12 102.839 25.0921   4
   0   0 -12 97.4736 18.4695  31
   0   0 -12 63.3598 16.2487  36
   0   0 -13-11.1302 17.9290  31
   0   0 -13 17.3821 15.0129  36
   0   0 -13 3.56773 21.6188   4
   0   0 -14 46.2492 19.6187  31
   0   0 -14 21.9717 21.4506   9
   0   0 -14 105.577 20.8038  26
   0   0 -14 56.6624 24.4513   2
   0   0 -15-13.2635 19.1501  26
   0   0 -15-14.9211 19.2305  31
   0   0 -16 4740.37 320.837  26
   0   0 -16 4880.57 319.757  31
   0   0 -17 33.0926 19.3015  31
   0   0 -17-15.7743 18.8675  26
   0   0 -18 3.74427 19.1636  26
   0   0 -18 16.5683 19.0112  31
   0   0 -19 20.8847 18.5230  31
   0   0 -19 1.68052 17.1152  26
   0   0 -20-1.25189 15.5531  31
   0   0 -20-21.2625 16.0349  26
   0   0 -21 4.79659 13.0555  31
   0   0 -21 1.63095 18.5859   8
   0   0 -21-2.17446 12.8014  26
   0  -1   0 0.96121 6.24481  11
   0  -1   0 0.78133 12.1601   5
   0  -1   0 3.41461 6.71838  18
   0   1   0 2.01236 5.34936  13
   0  -1  -1 6499.46 422.399  16
   0  -1   1 6648.41 420.051  18
   0  -1  -1 6507.90 419.403  18
   0  -1  -1 6358.29 421.046   1
   0  -1  -1 6452.71 420.672   6
   0  -1  -1 6509.34 420.248  11
   0   1  -1 6348.22 418.758  12
   0   1  -2 39.4342 7.87670  12
   0  -1  -2 37.9606 11.2937  21
   0   1   2 29.1993 7.14452  20
   0  -1  -2 31.7401 14.8302  16
   0  -1  -2 32.0888 10.3877   2
   0  -1  -2 27.0356 6.40572   9
   0  -1   2 15.6807 9.39548  18
   0  -1  -2 15.4118 9.26578  11
   0  -1  -2 29.0202 6.77287  18
   0  -1  -2 28.1322 10.5416   1
   0  -1  -3 1424.33 92.3763  16
   0  -1   3 1332.99 89.6096  18
   0  -1  -3 1263.97 90.2077   2
   0  -1  -3 1391.98 90.1389  11
   0  -1  -3 1339.77 87.5146  15
   0  -1  -3 1347.04 90.8161   1
   0  -1   3 1249.78 89.5574  17
   0  -1  -3 1391.88 89.6971  21
   0   1  -3 1311.96 88.9661  12
   0  -1  -4 38.8982 13.7902   2
   0  -1  -4 42.2880 10.9558  11
   0   1  -4 50.6330 12.2667  12
   0  -1   4 44.2250 13.5265  17
   0  -1   4 56.2757 12.9748  18
   0  -1   5 2549.63 165.116  18
   0  -1   5 2394.84 165.452  17
   0  -1  -5 2512.76 165.944  11
   0  -1  -5 2529.78 166.346   2
   0   1  -5 2473.99 165.230  12
   0  -1  -6 30.2625 13.2756   2
   0  -1  -6 20.5157 11.4078  11
   0   1  -6 20.1689 13.8976  12
   0   1  -6 27.6390 12.5220  19
   0  -1   6 10.6403 13.3489  17
   0   1  -7 9219.49 581.163  19
   0  -1   7 8744.23 580.450  17
   0  -1  -7 8703.74 581.343   2
   0   1  -8 127.532 20.1633  19
   0  -1  -8 148.188 22.4747   2
   0   1  -8 98.3371 20.6475   3
   0  -1   8 130.243 21.0732  17
   0   1  -9-3.56580 14.6378   3
   0  -1  -9-1.91259 15.0506   2
   0   1 -10 152.297 24.3807   3
   0  -1 -10 123.960 23.6027   2
   0   1 -11 1736.08 123.185   4
   0  -1 -11 1669.62 122.139   2
   0   1 -11 1706.18 122.698   3
   0  -1 -12 28.4263 16.6453  26
   0  -1 -12 18.2509 15.7494  31
   0   1 -12 19.1273 20.3350   4
   0   1 -12 2.80472 21.4089   3
   0  -1 -12 17.4155 20.8658   2
   0   1 -12 18.6626 17.1485  31
   0  -1 -13 1233.26 86.9933  26
   0  -1 -13 1284.44 86.2859  31
   0   1 -13 1258.02 86.5254  31
   0   1 -13 1140.14 94.3211   3
   0   1 -13 1224.24 97.0754   4
   0  -1 -13 1035.03 92.2450   2
   0   1 -14 98.6289 22.8652  31
   0  -1 -14 117.863 23.4593  26
   0   1 -14 90.9152 30.7849   4
   0  -1 -14 83.9386 21.5580  31
   0   1 -15 24.8060 19.6214  31
   0  -1 -15 36.9067 20.1380  26
   0  -1 -15 35.2665 18.7659  31
   0  -1 -16 20.9005 18.3518  26
   0   1 -16 11.9575 19.7498  26
   0   1 -16 25.7343 19.4809  31
   0  -1 -16-11.5941 18.4042  31
   0   1 -17 39.4298 20.2835  26
   0   1 -17 35.7259 20.5502  31
   0  -1 -17 83.3501 21.0233  31
   0  -1 -17 67.5015 20.7189  26
   0  -1 -18-1.75609 17.5853  26
   0   1 -18-1.60286 18.0334  31
   0   1 -18 12.9695 18.4008  26
   0  -1 -18 10.8953 24.3628   8
   0  -1 -18-4.59045 17.1408  31
   0  -1 -19 114.883 20.3681  31
   0  -1 -19 135.143 20.9108  26
   0   1 -19 98.5448 20.9355  26
   0   1 -19 124.239 21.1943  31
   0  -1 -19 77.2605 24.3376   8
   0   1 -20-5.92141 15.2848  31
   0   1 -20-4.09442 15.1204  26
   0  -1 -20 5.52850 14.2236  31
   0  -1 -20 19.1423 14.2638  26
   0  -1 -20-23.9930 20.2931   8
   0  -1 -21 39.1064 17.9445   8
   0   1 -21 69.9812 14.4859  26
   0   1 -21 38.0433 13.0725  31
   0  -1 -21 45.0696 12.7009  26
   0  -2   0 7721.82 516.224  18
   0  -2   0 8325.84 520.239   5
   0  -2  -1 38.6318 11.9182  18
   0  -2   1 13.3411 12.3494  18
   0  -2  -1 27.9611 24.3250   5
   0  -2   1-1.60039 23.4920   5
   0  -2  -1 15.1099 16.6796   1
   0  -2  -1 17.3760 20.0772   6
   0  -2  -1 15.5274 12.7342  11
   0  -2  -2 9339.88 601.893  11
   0  -2  -2 9233.64 603.364   1
   0  -2  -2 9131.38 602.735   6
   0  -2  -2 9236.98 599.850  18
   0  -2   2 9157.12 601.051  18
   0  -2   3 745.513 52.7186  18
   0  -2  -3 612.986 54.4450   1
   0  -2  -3 639.832 53.4232  11
   0  -2  -4 48731.5 3232.39  16
   0  -2   4 50469.0 3227.47  18
   0  -2  -4 50546.0 3229.42   1
   0  -2  -4 49081.1 3228.57  11
   0  -2  -5 321.011 43.4368  16
   0  -2   5 424.876 34.8168  18
   0  -2  -5 225.204 33.4698   1
   0  -2  -5 340.743 35.9428   2
   0  -2  -5 300.776 32.4625  11
   0  -2  -6 17649.4 1131.91   2
   0  -2  -6 18006.5 1136.33  16
   0  -2   6 16982.8 1130.37  18
   0  -2  -6 17196.6 1132.04  11
   0  -2  -7 5.91186 14.5163  11
   0  -2  -7 11.7318 17.3703   2
   0  -2  -7-11.3441 21.4103  16
   0  -2  -8-3.13456 22.1354  16
   0  -2  -8 10.8932 18.4596   2
   0  -2  -8 2.17313 14.9196  11
   0  -2  -9 27.8129 22.8764  16
   0  -2  -9-7.31196 17.2143   2
   0  -2 -10 1580.68 119.378   2
   0  -2 -10 1759.53 126.030  16
   0  -2  11-6.80794 18.6952  29
   0   2 -11 22.6162 20.4044   3
   0  -2 -11 17.0865 26.0805  16
   0  -2 -11 9.15506 21.7918   2
   0   2 -12-12.4427 23.0375   3
   0  -2 -12-10.1741 22.1830   2
   0  -2 -13 123.076 31.8546   2
   0   2 -13 116.061 31.9340   4
   0   2 -13 102.147 32.9802   3
   0  -2 -14 16437.8 1076.20   8
   0  -2 -15-8.80256 26.6071   8
   0   2 -16 1592.15 107.202  26
   0  -2 -16 1344.33 111.742   8
   0   2 -17-27.4155 19.1261  26
   0  -2 -17-2.77186 23.9606   8
   0  -2 -18-2.50444 23.5338   8
   0   2 -18 18.2054 17.0789  26
   0  -2 -19 23.4550 21.4344   8
   0   2 -19 32.4371 16.7438  26
   0  -2 -20 749.851 67.8746   8
   0   2 -20 1039.67 65.9540  26
   0  -3   0 8.70115 13.6250  18
   0  -3   0-9.46708 16.6239   1
   0  -3   0 43.9733 21.3118   6
   0  -3   0-15.4436 23.4150   5
   0  -3  -1 78.4921 15.5807  18
   0  -3   1 81.7452 26.5709   5
   0  -3  -1 55.3588 18.0284   1
   0  -3  -1 110.272 23.5884   6
   0  -3   1 87.4287 17.3927  18
   0  -3  -2 50.6193 21.7071   1
   0  -3  -2 52.0334 25.6635   6
   0  -3   2 52.0772 28.6909   5
   0  -3   2 42.3483 17.9067  18
   0  -3   3 7036.77 494.814   5
   0  -3   3 7638.04 491.141  18
   0  -3  -3 7651.02 494.703   1
   0  -3   4 76.3091 20.4349  18
   0  -3  -4 77.4139 21.8894   1
   0  -3   5 1482.33 102.865  18
   0  -3  -5 1383.35 105.095   1
   0  -3   6 99.0804 22.5599  18
   0  -3  -6 112.887 24.9734   1
   0  -3   7 6976.90 462.012  18
   0  -3  -9 71.7040 17.9955  25
   0  -3  -9 44.8940 26.2621   8
   0  -3   9 45.8075 19.9613  29
   0  -3 -10 12.6000 25.7376   8
   0  -3  10 32.9335 20.6157  29
   0   3 -10 11.7485 14.5884  22
   0   3 -11 1395.07 92.0472  22
   0  -3  11 1213.63 93.2762  29
   0  -3 -11 1220.22 98.1187   8
   0   3 -12-1.67898 16.7667  22
   0  -3 -12-5.62605 27.5459   8
   0  -3  12 6.30489 21.5000  29
   0  -3  13 452.884 43.9079  29
   0   3 -13 488.839 41.3665  22
   0  -3 -13 494.363 50.8413   8
   0  -3  14-26.5487 21.0575  29
   0  -3 -14 2.93156 25.2310   8
   0  -3  15 829.045 65.7093  29
   0  -3 -15 825.478 69.3796   8
   0  -3 -16-48.7267 24.4986   8
   0  -3 -17 206.833 31.7725   8
   0  -3 -18 16.6083 19.8880   8
   0  -3 -19 9.92186 16.7064   8
   0  -4   0 17237.7 1124.18   6
   0  -4   0 17086.9 1125.42   1
   0  -4   1 270.383 44.4539   6
   0  -4   1 384.925 50.7126   5
   0  -4  -1 257.254 41.4438   1
   0  -4   1 361.093 42.3006   1
   0  -4  -1 265.774 43.1977   6
   0  -4  -2 1356.90 100.849   1
   0  -4   2 1449.91 104.986   5
   0  -4   2 1065.16 98.2383   6
   0  -4  -2 1388.53 102.144   6
   0  -4  -3 124.559 26.4802   1
   0  -4   3 64.8048 35.9909   5
   0  -4   4 1055.67 95.0311   5
   0  -4  -4 1165.76 92.2909   1
   0  -4  -4 1257.75 86.0310   7
   0  -4  -4 1153.17 84.3672  25
   0  -4   5 118.669 38.7118   5
   0  -4   5 169.505 25.0946  29
   0  -4  -5 165.677 35.6587   8
   0  -4  -5 212.162 27.9748   7
   0  -4  -5 161.077 32.7126   1
   0  -4  -5 167.245 24.5643  25
   0  -4  -6 484.696 41.8689  25
   0  -4  -6 413.155 48.4838   1
   0  -4  -6 515.911 51.3504   8
   0  -4   6 397.320 56.5443   5
   0  -4   6 566.581 43.0205  29
   0  -4   7 69.2303 22.3159  29
   0  -4  -7 79.3159 21.9698  25
   0  -4  -7 105.773 34.3801   8
   0  -4   7 62.8467 34.2528   5
   0  -4   8 675.570 82.2947   5
   0  -4  -8 943.216 68.8433  25
   0  -4  -8 920.383 75.7106   8
   0  -4   8 874.705 69.0490  29
   0   4  -8 967.936 66.8567  22
   0  -4  -9 68.5974 21.1445  25
   0  -4   9 83.4729 23.5583  29
   0   4  -9 35.0472 18.1157  22
   0  -4  -9 56.6041 34.3713   8
   0  -4  10 4991.83 324.590  29
   0  -4 -10 4633.59 328.561   8
   0   4 -10 4893.19 322.538  22
   0  -4  11 280.576 33.0870  29
   0   4 -11 220.120 29.1641  22
   0  -4 -11 209.307 40.8133   8
   0   4 -12 696.170 52.8146  22
   0  -4 -12 638.159 60.9158   8
   0  -4  12 631.793 55.3251  29
   0   4 -13 180.457 25.0368  22
   0  -4  13 171.294 29.0211  29
   0  -4 -13 117.526 32.8419   8
   0  -4  14 31.2375 22.0123  29
   0   4 -14 18.5495 16.1012  22
   0  -4 -14 21.7074 25.7638   8
   0   4 -15 1.53973 15.2496  22
   0  -4 -15 4.95921 22.5552   8
   0  -4  15 1.91853 19.4208  29
   0  -4  16 166.240 25.5327  24
   0  -4  16 189.880 25.1717  29
   0  -4 -16 191.261 27.7969   8
   0  -4 -17 81.4292 22.8007   8
   0  -4  17 49.6907 18.1191  29
   0  -4  17 80.2720 19.7978  24
   0  -4  18 443.574 35.7941  24
   0  -4 -18 414.391 36.6083   8
   0  -5   0-6.05022 20.7557   7
   0  -5   0 53.4526 23.3774   1
   0  -5   0 28.4723 19.0837  25
   0  -5   0 43.9844 28.1314   6
   0  -5   1 1762.47 126.622   7
   0  -5   1 1708.61 125.759  25
   0  -5   1 1860.85 137.014   1
   0  -5  -1 1703.03 135.825   1
   0  -5  -1 1892.55 127.407   7
   0  -5   1 1874.64 136.546   6
   0  -5  -1 1845.78 126.251  25
   0  -5   2 12.0909 29.3879   6
   0  -5  -2-8.05805 21.7708   7
   0  -5   2 4.07497 21.6543   7
   0  -5  -2 21.8281 24.4044   1
   0  -5  -2 28.4461 19.5103  25
   0  -5   2 11.5453 19.1713  25
   0  -5   2-9.11700 25.2576   1
   0  -5  -3 890.067 76.3851   1
   0  -5   3 726.539 75.2645   1
   0  -5  -3 894.458 65.0956  25
   0  -5  -3 876.385 66.7168   7
   0  -5   3 775.662 76.0682   6
   0  -5   4-20.7071 28.5977   6
   0  -5  -4 15.1300 18.5255  25
   0  -5   4 20.3439 36.8901   5
   0  -5  -4 10.1077 19.5734   7
   0  -5  -5 20.9930 17.3550  25
   0  -5   6 31.0901 19.9451  29
   0  -5  -6-1.92177 16.9091  25
   0  -5  -7 745.827 57.5411  25
   0  -5   7 711.714 58.2170  29
   0   5  -8 86.0689 20.1895  22
   0  -5  -8 100.452 21.7287  25
   0  -5   8 86.2342 24.0769  29
   0   5  -9 134.441 20.7566  22
   0  -5   9 172.311 26.5501  29
   0  -5  -9 134.235 23.4010  25
   0  -5  10 93.1258 24.8906  29
   0   5 -10 91.0068 19.1905  22
   0  -5  11 46.5609 22.0344  29
   0   5 -11 71.9840 17.5512  22
   0  -5  12 46.0906 20.5460  29
   0   5 -12 31.4636 17.0079  22
   0   5 -13 19.0585 14.8629  22
   0  -5  13 18.9033 18.1755  24
   0  -5  13 26.7280 18.7496  29
   0  -5  14 9.50881 16.7309  29
   0  -5  14 20.1963 17.6447  24
   0   5 -14 7.85402 13.5167  22
   0  -5  15 150.523 21.9102  24
   0  -5  15 200.622 22.4339  29
   0  -5  16-11.8440 13.6518  29
   0  -5  16-17.4051 13.6974  24
   0  -6   0 106.569 21.6714   7
   0  -6   0 88.2691 20.7755  25
   0  -6   1 8.22161 20.6057   7
   0  -6  -1 30.5678 20.4331   7
   0  -6  -1 70.9990 20.0489  25
   0  -6   1 60.2448 19.5142  25
   0  -6  -2 1053.76 78.1797   7
   0  -6   2 949.344 76.5579   7
   0  -6  -2 1069.32 76.1605  25
   0  -6   3 278.738 36.0852   7
   0  -6  -3 328.655 34.1996  25
   0  -6  -3 348.014 36.3934   7
   0  -6  -4 6592.84 410.792  25
   0  -6   4 5823.09 411.129   7
   0  -6  -5 26.7355 17.5808  25
   0  -6   5 24.1408 18.4933   7
   0  -6   6 1280.78 97.4150   7
   0  -6  -6 1420.63 96.7050  25
   0  -6  -7 58.9118 18.3615  25
   0  -6   7 64.5976 20.2337   7
   0  -6   8-1.81494 16.6182   7
   0  -6   9 10.2417 16.5230   7
   0  -6   9-8.02392 16.6308  29
   0  -6  10 22.6042 15.8663  29
   0   6 -10 17.9797 12.6751  22
   0  -6  11 1.37924 14.6329  29
   0  -6  11 19.8469 15.0395   7
   0  -6  12 27.2131 14.5353   7
   0  -6  12 3.64732 13.6198  29
   0  -6  13-5.14335 11.9937  29
   0  -6  13-2.06530 12.1848   7
   0  -7   0 7.15493 13.7373   7
   0  -7   1 125.624 18.6679   7
   0  -7  -1 90.9301 15.8236  25
   0  -7  -2 21.2586 12.4715  25
   0  -7   2 35.3920 15.1768   7
   0  -7  -3 141.996 16.9613  25
   0  -7   3 107.156 18.9876   7
   0  -7  -4-1.18400 11.5707  25
   0  -7   4-16.1161 14.5845   7
   0  -7  -5 85.8893 13.5998  25
   0  -7   5 47.4912 14.9604   7
   0  -7   6 9.62140 13.0077   7
   0  -7   7 57.4699 13.5330   7
   0  -7   8 18.8216 11.9314   7
   0  -7   9 2.57295 10.5483   7
   1   0 -21 4.25199 13.5011  26
   1   0 -21 13.6277 17.6226   8
   1   0 -20 105.057 24.6046   8
   1   0 -20 112.952 19.8331  31
   1   0 -20 135.864 20.3837  26
   1   0 -19-26.5869 17.7894  31
   1   0 -19-1.68178 17.4091  26
   1   0 -18 1225.03 86.0785  26
   1   0 -18 1128.52 84.7900  31
   1   0 -17 1.99296 19.6842  26
   1   0 -17 7.01606 20.1999  31
   1   0 -16 2627.48 173.795  26
   1   0 -16 2452.62 172.487  31
   1   0 -15-7.74608 19.6322  26
   1   0 -15-25.3888 20.3474  31
   1   0 -14 64.4959 25.5755   2
   1   0 -14 59.8461 20.0318  31
   1   0 -14 50.5692 21.0448  26
   1   0 -13-1.43374 17.1129  31
   1   0 -13-7.24019 21.9343   4
   1   0 -13 1.64565 18.3938  26
   1   0 -13 3.18688 20.1555   2
   1   0 -12 125.102 21.2890  26
   1   0 -12 108.471 20.4208  31
   1   0 -12 79.2095 24.5771   4
   1   0 -12 111.368 29.2347  19
   1   0 -11 18.7495 19.9017  19
   1   0 -11-2.73921 18.2524   4
   1   0 -10 29.5741 20.2289  19
   1   0 -10 30.4928 17.4262   4
   1   0 -10 43.5713 16.6140   3
   1   0  -9-11.4534 14.7860  19
   1   0  -9-9.95869 14.8208   4
   1   0  -9-5.04359 14.0286   3
   1   0  -9 7.89822 15.3835  12
   1   0  -8 4470.43 309.561   3
   1   0  -8 4711.51 309.360  12
   1   0  -8 4877.58 311.034   4
   1   0  -8 4716.25 312.095  19
   1   0  -7-2.74261 12.0150   4
   1   0  -7 3.25448 13.9473  19
   1   0  -7-5.92291 11.0617   3
   1   0  -7-12.4686 13.0567  12
   1   0  -6 14201.3 915.720  19
   1   0  -6 13771.4 914.768   4
   1   0  -6 13998.1 914.035   3
   1   0  -6 14262.1 913.850  12
   1   0  -5 1.11126 12.8553  19
   1   0  -5 9.02164 10.9600   4
   1   0  -5 18.4201 12.8583  12
   1   0  -5-0.79093 10.5296   3
   1   0  -4 9459.77 607.004  19
   1   0  -4 9223.91 605.712   3
   1   0  -3 23.3859 8.27899   3
   1   0  -3 29.8210 11.7619  19
   1   0  -2 16496.6 1066.55   3
   1   0  -2 16421.0 1067.71  19
   1   0  -1 1.30162 6.52839  14
   1   0  -1 2.14332 2.97626   3
   1   0  -1 2.47211 3.17974   4
   1   0   0 9.64348 6.09472  14
  -1   0   0 3.88570 8.06680  20
  -1   0  -1 6.80826 9.33461  20
  -1   0  -1-0.15873 3.00555   3
  -1   0  -1 1.96459 3.32696   4
  -1   0  -2 15747.1 1013.78  13
  -1   0  -2 15973.5 1012.81   3
  -1   0  -2 15356.7 1012.79  16
  -1   0  -2 15762.4 1013.66   9
   1   0   2 15460.7 1012.81  21
  -1   0  -3 26.8938 12.1200   9
  -1   0  -3 17.0224 9.01644  10
   1   0   3 32.3287 10.9175  17
  -1   0  -3 11.3275 7.85746   3
   1   0   4 9420.53 606.938  17
  -1   0  -4 9506.47 606.783   4
  -1   0  -4 9360.88 606.760  10
  -1   0  -4 9009.75 606.422   3
  -1   0  -4 9415.56 606.834   9
  -1   0  -5 6.97982 9.69758  10
  -1   0  -5 4.52052 11.4412   4
   1   0   5-0.85614 11.8949  17
  -1   0  -5 6.46793 13.0066   9
  -1   0  -5 7.98411 10.2593   3
   1   0   6 13667.1 895.632  17
  -1   0  -6 13942.5 895.573   9
  -1   0  -6 14440.0 896.370   4
  -1   0  -6 13129.2 895.832   3
  -1   0  -7 14.4231 13.3743   9
   1   0   7 4.63012 12.3631  17
  -1   0  -7-2.72779 12.5749   4
  -1   0  -7 8.42026 11.7850   3
  -1   0  -8 4674.47 300.414   3
  -1   0  -8 4662.22 301.732   4
  -1   0  -8 4405.53 299.710   9
   1   0   8 4459.24 299.956  17
  -1   0  -9 18.3796 14.1112   3
  -1   0  -9-3.01760 14.8256   9
  -1   0  -9 7.88026 16.1813   4
  -1   0 -10 55.5474 19.1859   4
  -1   0 -10 43.6083 17.6210   9
  -1   0 -10 27.4845 17.0309   3
  -1   0 -11-8.09019 17.5193   4
  -1   0 -11-2.00943 17.4128   9
  -1   0 -12 77.9354 22.6683   9
  -1   0 -12 43.5725 21.6959   4
  -1   0 -12 105.941 17.9481  36
  -1   0 -12 96.2041 19.2112  34
  -1   0 -13 3.54832 22.5945   4
  -1   0 -13-13.8639 15.7988  36
  -1   0 -13-21.3434 17.9982  31
  -1   0 -13 22.0489 17.2916  34
  -1   0 -13 15.6270 20.0355   2
  -1   0 -13 7.79457 21.4164   9
  -1   0 -14 57.4949 19.0422  31
  -1   0 -14 14.0225 21.0807   2
  -1   0 -14 25.8757 24.4029   9
  -1   0 -14 53.0776 17.8665  36
  -1   0 -15 16.6255 19.7896  31
  -1   0 -15 12.9282 17.0694  36
  -1   0 -16 2630.05 175.325  26
  -1   0 -16 2508.82 174.450  31
  -1   0 -17 6.81158 18.2235  31
  -1   0 -17-3.77569 18.3806  26
  -1   0 -18 1043.70 78.2144  26
  -1   0 -18 1081.84 77.7993  31
  -1   0 -19-19.9925 17.2228  31
  -1   0 -19-1.57072 16.2519  26
  -1   0 -20 154.581 25.9582   8
  -1   0 -20 107.953 18.7642  26
  -1   0 -20 134.594 20.2187  31
  -1   0 -21 3.89191 12.6050  26
  -1   0 -21 4.48738 12.7676  31
  -1   0 -21 13.2345 16.4769   8
   1  -1 -21-19.2516 13.0424  26
   1   1 -20 136.508 21.1593  26
   1  -1 -20 178.548 26.9039   8
   1  -1 -20 169.579 21.2358  26
   1   1 -19 133.072 22.0910  26
   1   1 -19 107.423 20.7376  31
   1  -1 -19 72.2621 25.7648   8
   1  -1 -19 103.978 19.7825  31
   1  -1 -19 138.694 21.4173  26
   1   1 -18 171.603 25.0461  31
   1   1 -18 154.968 24.6748  26
   1  -1 -18 150.669 24.7119  26
   1  -1 -18 195.839 25.2385  31
   1  -1 -18 186.100 30.6984   8
   1  -1 -17 565.156 46.0751  31
   1   1 -17 538.148 46.1110  31
   1  -1 -17 520.690 46.9766  26
   1   1 -17 550.051 46.7204  26
   1   1 -16 777.664 58.7554  31
   1  -1 -16 761.957 58.2839  31
   1   1 -16 658.323 58.6828  26
   1  -1 -16 754.099 59.1348  26
   1  -1 -15 112.434 22.6706  26
   1  -1 -15 71.9677 21.9654  31
   1   1 -15 109.045 22.6625  26
   1   1 -15 91.1573 22.9915  31
   1  -1 -14 136.882 23.6478  31
   1  -1 -14 135.625 24.5832  26
   1   1 -14 109.701 23.4696  26
   1   1 -14 153.414 24.6827  31
   1   1 -14 108.710 30.5400   4
   1  -1 -13 552.254 45.8608  26
   1  -1 -13 474.315 50.4593   2
   1  -1 -13 577.074 45.1652  31
   1   1 -13 574.327 45.3247  31
   1   1 -13 589.086 46.3438  26
   1   1 -13 471.937 53.6801   4
   1   1 -13 502.160 51.8898   3
   1   1 -12 989.427 70.9491  31
   1  -1 -12 768.276 75.7279   2
   1  -1 -12 1028.39 70.8479  31
   1   1 -12 971.058 78.1856   3
   1  -1 -12 1042.01 72.1988  26
   1   1 -12 999.629 80.0937   4
   1   1 -11 11.2908 19.4994   4
   1  -1 -11-2.72203 14.9565  26
   1   1 -11 34.6256 19.8130   3
   1   1 -11-3.06698 19.9316  19
   1  -1 -11 23.2090 18.8110   2
   1   1 -10 1574.29 111.084   3
   1  -1 -10 1524.26 111.005   2
   1   1 -10 1562.64 113.242  19
   1   1  -9 1582.80 108.564  12
   1  -1  -9 1486.37 108.715   2
   1   1  -9 1528.21 108.955   3
   1   1  -9 1565.95 110.142  19
   1   1  -8 2211.31 151.799   3
   1  -1  -8 2048.31 154.180  19
   1   1  -8 2323.53 153.223  19
   1  -1  -8 2164.54 151.907   2
   1   1  -8 2352.38 151.848  12
   1  -1  -7 342.296 31.7364   2
   1   1  -7 350.206 31.6386  12
   1   1  -7 374.383 32.6103  19
   1  -1  -7 352.490 34.9103  19
   1   1  -6 12033.9 755.088  12
   1  -1  -6 11392.3 757.519  19
   1  -1  -6 11512.5 755.013  14
   1  -1  -6 11359.9 755.443   2
   1   1  -5 1696.82 107.027  12
   1  -1  -5 1595.80 109.361  19
   1  -1  -5 1523.94 106.789  14
  -1  -1   5 1649.75 106.060  15
   1  -1  -5 1446.48 104.979  12
   1  -1  -5 1600.26 107.160   2
   1  -1  -4 20749.3 1323.09  19
  -1  -1   4 20400.2 1320.74  15
   1  -1  -4 20021.9 1319.46  12
   1  -1  -4 20681.4 1321.25   2
   1  -1  -3 1582.30 106.448  12
  -1  -1   3 1592.11 108.146  15
   1  -1  -3 1630.06 108.541   2
   1  -1  -3 1682.93 108.909   1
   1  -1  -2 8779.44 565.242   1
  -1   1   2 8899.33 565.836  20
  -1  -1   2 8828.77 564.800  15
   1  -1  -2 8286.21 564.865   2
   1  -1  -1 402.011 29.2126   1
  -1  -1   1 378.330 28.0607  15
   1  -1  -1 343.897 30.5354  16
   1  -1  -1 405.038 31.4470  21
   1  -1  -1 358.835 29.3309   6
   1  -1  -1 362.507 25.6810  17
  -1   1   1 412.939 31.2299  20
  -1  -1   0 34.0097 10.2593  15
   1  -1   0 35.2331 14.5940  16
   1  -1   0 59.0258 17.0418  21
  -1  -1   0 33.8753 15.1855   5
   1  -1   0 45.4179 8.49652  17
   1  -1   0 36.0811 15.2475   5
  -1   1  -1 334.226 28.1630  13
   1  -1   1 380.868 29.9293  21
  -1   1  -1 314.187 25.3008   9
  -1  -1  -1 323.139 27.2937   6
   1  -1   1 377.509 25.6594  17
  -1  -1  -1 375.290 26.2220  15
  -1  -1  -1 331.396 26.9386   1
   1  -1   2 8985.89 568.838  17
  -1   1  -2 8583.87 568.376   9
  -1  -1  -2 8697.61 569.676   1
  -1  -1  -2 8728.03 569.615   2
  -1   1  -2 8825.72 570.347  13
   1  -1   3 1686.76 111.228  17
  -1   1  -3 1652.32 110.715   9
  -1  -1  -3 1698.93 111.753   1
  -1  -1  -3 1653.87 111.707   2
  -1   1  -3 1599.66 112.640  13
   1  -1   4 21171.3 1366.03  17
  -1  -1  -4 21703.2 1368.97  16
  -1  -1  -4 21355.1 1366.82  11
  -1  -1  -4 20664.4 1365.61   9
  -1  -1  -4 20790.3 1366.35   2
   1  -1   5 1474.03 96.4992  17
  -1  -1  -5 1420.26 96.0168   9
  -1  -1  -5 1392.15 96.9438  11
  -1  -1  -5 1333.10 96.6604   2
  -1  -1  -5 1438.84 99.5431  16
   1  -1   6 12246.3 804.697  17
  -1  -1  -6 12072.7 803.952   9
  -1  -1  -6 12139.8 805.605  11
  -1  -1  -6 12663.2 805.223   2
  -1  -1  -6 12939.3 807.711  16
  -1  -1  -7 278.888 26.3390  11
  -1  -1  -7 301.950 27.6406   2
   1  -1   7 254.825 26.9772  17
  -1  -1  -7 251.492 26.0483   9
  -1   1  -8 2291.03 155.015   3
   1  -1   8 2325.30 155.261  17
  -1  -1  -8 2293.90 153.807   9
  -1  -1  -8 2200.92 154.872   2
  -1  -1  -9 1504.81 104.286   9
  -1   1  -9 1451.14 105.648   3
  -1  -1  -9 1503.36 105.830   2
   1  -1   9 1511.36 105.666  17
  -1   1 -10 1396.40 103.816   3
  -1  -1 -10 1507.14 103.204   9
   1  -1  10 1479.06 104.295  17
  -1  -1 -10 1427.03 104.811   2
   1  -1  11 17.0933 19.2438  17
  -1  -1 -11 13.4846 13.5312  36
  -1  -1 -11 20.4443 19.4129   2
  -1   1 -11 14.6098 17.1322   3
  -1   1 -11 4.23813 18.8529   9
  -1   1 -11 33.1034 19.4011   4
  -1  -1 -12 1029.98 72.2215  36
  -1  -1 -12 987.755 72.6943  34
  -1   1 -12 898.861 79.7483   4
  -1   1 -12 1105.22 78.0556   9
  -1   1 -12 1067.28 72.0472  36
  -1   1 -12 1047.83 79.3557   3
  -1  -1 -12 834.813 77.3414   2
  -1  -1 -13 422.614 38.6671  34
  -1  -1 -13 334.328 43.6668   2
  -1   1 -13 487.243 39.0057  36
  -1   1 -13 405.873 46.3738   3
  -1   1 -13 429.911 44.9226   9
  -1  -1 -13 523.517 39.5673  31
  -1   1 -13 503.664 39.6734  31
  -1   1 -13 463.592 50.2649   4
  -1  -1 -14 96.7622 20.5873  34
  -1   1 -14 59.1290 20.3373  31
  -1  -1 -14 93.2923 21.1768  31
  -1   1 -14 89.5043 28.8261   4
  -1   1 -14 105.662 20.5782  36
  -1  -1 -15 70.5846 20.7519  34
  -1   1 -15 114.142 22.0159  31
  -1   1 -15 107.893 20.7052  36
  -1  -1 -15 110.122 21.5548  26
  -1  -1 -15 85.0224 21.1730  31
  -1   1 -16 758.702 60.8306  36
  -1  -1 -16 848.830 61.5527  31
  -1   1 -16 826.183 61.8906  31
  -1  -1 -16 761.846 61.2141  26
  -1   1 -17 545.025 46.0869  26
  -1  -1 -17 527.740 44.4256  31
  -1  -1 -17 497.311 43.9097  26
  -1   1 -17 533.969 44.7395  31
  -1  -1 -18 237.124 25.7549  31
  -1   1 -18 227.956 26.4950  31
  -1   1 -18 187.379 27.2302  26
  -1  -1 -19 103.541 19.8206  31
  -1  -1 -19 147.229 28.0999   8
  -1   1 -19 136.137 22.6852  26
  -1   1 -19 116.052 20.6929  31
  -1   1 -20 168.446 21.4673  26
  -1   1 -20 190.134 21.5372  31
  -1  -1 -20 125.473 25.0206   8
  -1  -1 -20 178.963 20.4191  31
  -1   1 -21 15.3801 12.4683  26
  -1   1 -21 4.15028 16.4966   8
   1  -2 -20 71.2254 19.3391   8
   1  -2 -19 102.058 19.1797  26
   1  -2 -19 148.674 24.7673   8
   1  -2 -18 60.5690 25.2296   8
   1  -2 -18 71.0739 18.7392  26
   1  -2 -17 51.4357 26.9335   8
   1  -2 -17 97.3219 21.3851  26
   1  -2 -16 112.605 22.4767  26
   1  -2 -16 126.295 30.6229   8
   1  -2 -15 121.605 22.3706  26
   1  -2 -15 66.9478 26.8197   8
   1  -2 -14 68.6309 20.6996  26
   1  -2 -14 48.3193 26.6569   8
   1  -2 -13 1260.56 86.8595  26
   1  -2 -13 998.076 100.359  16
   1  -2 -13 1189.96 92.3151   8
   1   2 -13 1231.25 98.0259   4
   1   2 -12 100.529 27.9193   3
   1  -2 -12 109.166 32.7016  16
   1  -2 -12 93.0804 26.1194   2
   1  -2 -12 107.553 21.7217  26
   1  -2 -11 64.7546 24.4021   2
   1  -2 -11 99.9807 19.7784  26
   1  -2 -11 63.0030 30.2543  16
   1   2 -11 79.3112 22.8027   3
   1  -2 -10 24.1577 25.3205  16
   1   2 -10 7.60472 20.3354   3
   1   2 -10 32.9762 19.5129  19
   1  -2 -10 13.8061 19.7511   2
   1  -2  -9 3144.33 221.525   2
   1  -2  -9 3200.05 226.416  16
   1   2  -9 3320.95 222.989  19
   1   2  -9 3306.29 219.987  12
   1  -2  -8 3005.10 204.991  16
   1   2  -8 2834.64 196.755  12
   1  -2  -8 2969.38 199.268   2
   1  -2  -7 944.069 70.7695   2
   1  -2  -7 866.847 74.9724  16
   1   2  -7 938.620 68.0523  12
   1   2  -6 3193.68 219.128  12
   1  -2  -6 3379.44 226.061  16
   1  -2  -6 3385.27 221.947   2
   1  -2  -5 1575.29 111.412  21
   1   2  -5 1586.25 108.685  12
   1  -2  -5 1619.60 111.906   1
   1  -2  -5 1564.84 114.921  16
   1   2  -4 4046.57 275.080  12
   1  -2  -4 4282.39 278.358  21
   1  -2  -4 4423.61 281.483  16
   1  -2  -4 4160.18 278.542   1
   1  -2  -3 4914.35 318.071  21
   1  -2  -3 4622.81 320.693  16
   1  -2  -3 4825.05 318.071   1
   1  -2  -2 3798.13 242.408  21
   1  -2  -2 3550.85 238.797  18
   1  -2  -2 3563.39 241.850   1
   1  -2  -2 3773.80 241.975   6
   1  -2  -2 3504.58 244.070  16
   1  -2  -1 114.378 23.9172   6
   1  -2  -1 135.215 22.6630   1
  -1  -2   1 148.952 16.8320  11
   1  -2  -1 200.584 25.9674  21
   1  -2  -1 162.132 18.8345  18
  -1  -2   1 77.8106 25.5732   5
  -1  -2   0 19.0960 10.8807  15
  -1   2   0 12.2691 13.5800  13
  -1  -2   0 12.1640 11.0753  11
  -1  -2   0 29.9837 22.6743   5
   1  -2   0 13.1803 23.7642   5
  -1   2  -1 194.071 21.1530  13
  -1  -2  -1 196.177 19.2752  15
  -1  -2  -1 198.115 19.3038  11
  -1  -2  -1 145.394 24.3201   6
  -1  -2  -1 156.537 23.3805   1
   1  -2   1 126.205 30.0327   5
  -1  -2  -2 3274.60 225.250   1
  -1  -2  -2 3464.11 222.904  15
  -1  -2  -2 3397.39 225.302   6
   1  -2   2 3472.44 224.405  18
  -1  -2  -2 3298.94 224.180  11
  -1   2  -2 3324.46 224.395  13
  -1  -2  -3 4605.11 306.366  11
   1  -2   3 4746.95 306.363  18
  -1  -2  -3 4560.89 306.894   1
  -1  -2  -4 4102.57 273.968   1
   1  -2   4 4144.93 273.340  18
  -1  -2  -4 4233.42 273.856  11
   1  -2   4 4032.62 272.036  17
   1  -2   5 1728.10 121.473  17
  -1  -2  -5 1800.58 122.808  11
  -1  -2  -5 1734.60 123.482   1
   1  -2   5 1834.84 122.588  18
   1  -2   6 3051.47 205.625  18
  -1  -2  -6 3030.89 206.713  11
  -1  -2  -6 3111.76 206.782   2
   1  -2   6 3041.72 205.009  17
  -1  -2  -7 898.412 68.1903  11
   1  -2   7 833.318 66.1310  17
  -1  -2  -7 998.204 69.2309   2
  -1  -2  -7 819.220 73.1656  16
   1  -2   8 2638.46 185.901  17
  -1  -2  -8 2866.00 193.427  16
  -1  -2  -8 2801.53 187.253  11
  -1  -2  -8 2680.91 187.055   2
  -1  -2  -9 3171.17 216.733   2
  -1   2 -10-2.48551 17.1790   3
  -1  -2 -10 5.51520 21.0308   2
  -1   2 -10 36.0662 18.1823   9
  -1  -2 -11 110.493 23.7725   2
  -1   2 -11 54.9803 21.3048   9
  -1   2 -11 88.7926 23.7507   3
  -1  -2 -12 101.834 26.2815   2
  -1   2 -12 46.1120 22.8858   3
  -1   2 -12 74.9939 24.5784   9
  -1   2 -13 1103.05 94.8732   4
   1  -2  13 1164.83 88.6515  29
  -1  -2 -13 1253.20 92.1671   8
  -1  -2 -14 56.0198 29.2487   8
   1  -2  14 68.8471 22.5028  29
   1  -2  15 117.750 26.3307  29
  -1  -2 -15 140.181 32.5933   8
  -1  -2 -16 67.5555 26.7154   8
  -1  -2 -17 52.9568 27.3737   8
  -1  -2 -18 70.9501 24.8288   8
  -1   2 -18 111.020 21.2004  26
  -1  -2 -19 59.5726 23.5552   8
  -1   2 -19 165.145 20.7703  26
  -1  -2 -20 83.4189 20.0695   8
  -1   2 -20 73.1760 16.2112  26
   1  -3 -19-7.70666 17.7141   8
  -1  -3  19 22.9402 20.1387  37
   1  -3 -18 102.845 24.8696   8
  -1  -3  18 141.589 26.3621  37
   1  -3 -17 14.0779 22.3293   8
  -1  -3  17 55.2922 26.9259  37
  -1  -3  16 170.859 27.6601  24
   1  -3 -16 197.329 32.3762   8
   1  -3 -15 155.004 31.4372   8
   1  -3 -14 49.1154 28.6753   8
   1   3 -14 42.0617 18.8820  22
   1   3 -13 925.503 66.5190  22
   1  -3 -13 794.488 72.9213   8
   1  -3 -12 67.1206 29.9991   8
   1   3 -12 95.1945 21.3775  22
  -1  -3  12 100.177 25.5906  29
  -1  -3  11 461.814 41.9988  29
   1  -3 -11 485.779 48.7666   8
   1  -3 -11 351.751 56.7057  16
   1   3 -11 427.320 38.5312  22
   1  -3 -10 330.908 50.7716  16
   1   3 -10 312.237 31.4319  22
   1  -3 -10 337.568 40.1827   8
  -1  -3  10 368.765 34.8672  29
   1   3  -9 1956.97 138.776  22
  -1  -3   9 1987.86 140.963  29
   1  -3  -9 2118.92 145.665   8
   1  -3  -9 2161.29 140.851  25
   1  -3  -9 2057.34 156.146  16
   1  -3  -8 4714.08 307.151   8
  -1  -3   8 4631.86 304.015  29
   1  -3  -8 4761.24 317.966  16
   1   3  -8 4434.61 302.168  22
  -1  -3   7 401.714 39.5794  15
   1  -3  -7 568.610 54.9681  16
   1  -3  -6 86.6684 23.2964   1
   1  -3  -6 16.1662 31.2024  16
   1  -3  -5 3177.40 218.141   1
   1  -3  -4 1160.78 87.9443   1
   1  -3  -3 141.981 25.0718   1
  -1  -3   3 121.723 28.8146   5
   1  -3  -2 1218.16 89.3460   6
  -1  -3   2 1120.33 90.1952   5
   1  -3  -2 1221.16 89.1010   1
   1  -3  -1 3261.06 225.613  18
   1  -3  -1 3344.28 230.438   1
   1  -3  -1 3601.59 230.255   6
  -1  -3   1 3486.23 232.177   5
  -1  -3   1 3370.01 226.489  15
  -1  -3   0 132.362 19.6030  15
   1  -3   0 126.789 21.0692  18
  -1  -3   0 142.047 28.9011   5
   1  -3   0 122.122 24.5520   1
  -1  -3   0 135.465 27.2591   6
  -1  -3   0 120.851 25.0215   1
   1  -3   0 124.352 32.2047   5
   1  -3   0 106.055 25.4328   6
  -1  -3  -1 3282.47 225.176   6
  -1  -3  -1 3350.88 221.889  15
  -1  -3  -1 3001.37 225.697   1
   1  -3   1 3404.21 222.804  18
  -1  -3  -1 3326.56 223.348  11
   1  -3   1 3619.30 229.127   5
   1  -3   2 1104.02 79.5945  18
  -1  -3  -2 1162.59 80.7328  11
  -1  -3  -2 1093.04 82.0703   6
   1  -3   2 1028.98 85.6511   5
  -1  -3  -2 1066.68 83.0331   1
   1  -3   3 65.8497 28.8583   5
  -1  -3  -3 57.0737 19.4312   1
   1  -3   3 77.5900 18.6502  18
  -1  -3  -3 97.8648 19.1420  11
  -1  -3  -4 1356.88 94.1972  11
  -1  -3  -4 1189.45 95.0765   1
   1  -3   4 1302.32 92.9835  18
  -1  -3  -5 2802.79 193.698  11
  -1  -3  -5 2811.13 194.749   1
   1  -3   5 2846.79 192.445  18
   1  -3   6 63.9378 21.2645  18
  -1  -3  -6 40.4008 18.9798   1
  -1  -3  -6 21.1545 17.7991  11
  -1  -3  -7 413.459 41.0951  11
   1  -3   7 430.233 40.8818  18
  -1  -3  -8 4263.89 300.673  11
  -1  -3  -8 4567.46 293.931  25
   1  -3   8 4300.61 293.782  29
  -1  -3  -8 4558.28 297.943   8
  -1  -3  -9 2531.95 160.401   8
  -1  -3  -9 2265.64 163.026  11
   1  -3   9 2120.32 155.986  29
  -1  -3 -10 388.242 41.3414   8
   1  -3  10 292.526 34.1560  29
   1  -3  11 398.991 40.6875  29
  -1  -3 -11 441.908 44.9906   8
   1  -3  12 92.8075 25.0597  29
  -1  -3 -12 125.115 32.0074   8
  -1   3 -13 962.080 67.7420  22
  -1  -3 -13 813.104 72.7873   8
   1  -3  13 870.671 70.8834  29
  -1  -3 -14-17.1309 24.9510   8
   1  -3  14 52.2797 22.3593  29
  -1  -3 -15 197.193 33.8722   8
   1  -3  15 227.837 30.7921  29
   1  -3  16 162.670 27.4084  29
  -1  -3 -16 196.563 31.3252   8
   1  -3  17 7.28119 18.6816  29
  -1  -3 -17 13.8088 22.4813   8
  -1  -3 -18 151.108 25.2260   8
  -1  -3 -19-9.06372 16.5583   8
  -1  -4  17 140.502 20.9644  24
   1  -4 -17 103.762 21.6934   8
  -1  -4  16 34.7003 21.9188  37
  -1  -4  16 26.7400 19.5695  24
   1  -4 -16 24.8614 21.4951   8
  -1  -4  15 47.0038 20.0015  29
  -1  -4  15 17.1020 19.9951  24
   1  -4 -15 38.1695 22.8168   8
  -1  -4  15 58.4863 26.2644  37
  -1  -4  14 246.366 34.6637  37
   1  -4 -14 170.909 32.2603   8
  -1  -4  14 198.396 27.7587  29
  -1  -4  14 222.771 29.6681  24
   1   4 -13 37.1064 17.1778  22
  -1  -4  13 33.8621 21.3501  29
   1  -4 -13 27.9430 25.5843   8
  -1  -4  13 19.2076 28.1202  37
   1   4 -12 216.694 27.5592  22
  -1  -4  12 263.171 32.5488  29
   1  -4 -12 256.426 37.7048   8
  -1  -4  12 262.503 37.0054  37
  -1  -4  11 188.492 35.2599  37
  -1  -4  11 255.442 30.5600  29
   1   4 -11 224.652 27.0381  22
   1  -4 -11 153.701 35.3434   8
  -1  -4  10 384.119 41.8605  37
  -1  -4  10 308.552 35.1517  29
   1   4 -10 306.945 31.2844  22
   1  -4 -10 321.069 42.5825   8
  -1  -4   9 167.743 34.2769  37
   1  -4  -9 178.961 26.3673  25
   1   4  -9 190.674 23.9235  22
   1  -4  -9 156.724 35.5019   8
  -1  -4   9 138.135 45.0466   5
  -1  -4   9 252.477 29.0508  29
   1  -4  -8 214.240 25.3359  25
   1  -4  -8 197.962 34.6771   8
   1   4  -8 160.730 21.9984  22
  -1  -4   8 182.965 27.2659  29
  -1  -4   8 134.901 31.9617  37
  -1  -4   7 448.458 45.0580  37
  -1  -4   7 454.420 42.1999  29
   1   4  -7 475.791 38.5236  22
   1  -4  -7 541.993 42.1399  25
  -1  -4   7 469.884 46.0948  15
   1  -4  -7 450.409 49.1974   8
  -1  -4   6 76.2859 35.8636   5
  -1  -4   6 106.788 27.6174  37
   1   4  -6 134.665 18.9098  22
  -1  -4   6 154.497 25.2753  15
   1  -4  -6 148.814 23.9303  25
  -1  -4   6 138.869 23.8402  29
   1  -4  -6 139.611 29.5194   1
   1  -4  -6 144.067 33.8639   8
   1  -4  -5 471.552 43.0954  25
  -1  -4   5 516.312 46.5689  15
   1  -4  -5 573.855 44.6351   7
   1  -4  -5 469.157 50.7302   1
  -1  -4   5 459.158 42.5139  29
   1  -4  -5 557.251 50.7166   8
  -1  -4   5 365.074 53.8829   5
  -1  -4   5 540.750 47.6571  37
   1  -4  -4 958.904 80.9419   1
   1  -4  -4 1099.19 74.6024   7
  -1  -4   4 1006.33 72.7052  29
  -1  -4   4 1083.03 76.9135  37
   1  -4  -4 1067.58 73.4243  25
  -1  -4   4 878.679 75.8168  15
   1  -4  -3 73.3809 24.4651   1
  -1  -4   3 80.1434 19.7487  15
  -1  -4   3 15.0728 31.0751   5
   1  -4  -3 62.4386 20.3943   7
   1  -4  -3 57.7619 20.0584  25
  -1  -4   2 98.6808 26.0580   1
   1  -4  -2 104.842 26.6905   1
  -1  -4   2 108.127 28.6581   6
  -1  -4   2 155.718 35.1768   5
  -1  -4   2 157.716 23.5747  15
   1  -4  -2 165.365 32.8398   6
  -1  -4   1 1018.21 81.7104   6
   1  -4  -1 1054.87 83.4736   1
  -1  -4   1 874.092 80.9521   1
   1  -4  -1 1134.10 85.0220   6
  -1  -4   1 1080.81 77.6557  15
  -1  -4   0 13.4265 19.9629   1
  -1  -4   0 56.7319 17.5693  15
  -1  -4   0 38.5145 24.2222   6
   1  -4   0 68.5666 26.8847   6
   1  -4   0 80.8643 26.9729   1
   1  -4   1 955.542 80.4260   6
   1  -4   1 921.512 80.1335   1
  -1  -4  -1 969.006 79.5056   6
   1  -4   1 1078.59 75.8521  18
  -1  -4  -1 980.010 80.3481   1
  -1  -4  -2 130.081 26.7314   1
   1  -4   2 184.787 29.0269   1
   1  -4   2 122.632 32.1469   6
   1  -4   2 120.262 22.5142  18
   1  -4   2 111.481 34.5242   5
   1  -4   3 66.2266 21.1445  25
  -1  -4  -3 86.7834 26.2104   1
   1  -4   3 93.3598 21.7620  18
  -1  -4  -3 81.0643 20.1972   7
   1  -4   3 85.8085 33.9561   5
  -1  -4  -4 763.745 73.1509   1
   1  -4   4 936.845 72.3071  18
   1  -4   4 805.364 79.4826   5
  -1  -4  -4 984.739 68.5935   7
  -1  -4  -4 926.628 66.5182  25
  -1  -4  -5 502.037 40.5862   7
  -1  -4  -5 452.961 47.5474   1
   1  -4   5 436.022 44.2515  18
  -1  -4  -5 459.172 49.5131   8
  -1  -4  -5 463.155 38.6225  25
  -1  -4  -6 115.946 27.0975   1
  -1  -4  -6 105.877 20.0810  25
   1  -4   6 185.195 28.4914  18
  -1  -4  -6 120.822 33.2340   8
   1  -4   6 117.483 36.4818   5
   1  -4   7 336.544 54.4444   5
  -1  -4  -7 395.026 36.4794  25
   1  -4   7 415.695 42.9221  18
   1  -4   7 442.158 38.6929  29
  -1  -4  -7 413.864 46.0502   8
  -1  -4  -8 215.424 25.2973  25
   1  -4   8 153.037 42.6762   5
   1  -4   8 162.491 26.5674  29
   1  -4   8 145.161 30.0204  18
  -1  -4  -8 254.541 39.5764   8
  -1  -4  -9 194.196 36.6663   8
   1  -4   9 180.701 44.7211   5
   1  -4   9 205.875 27.6603  29
   1  -4  10 270.400 33.3991  29
  -1  -4 -10 258.556 39.2864   8
  -1  -4 -11 254.903 38.4561   8
  -1   4 -11 280.116 29.6610  22
   1  -4  11 228.492 31.4607  29
  -1   4 -12 190.319 25.1458  22
   1  -4  12 248.011 29.9271  29
  -1  -4 -12 186.466 35.8417   8
  -1  -4 -13 27.7382 27.1832   8
  -1   4 -13 17.4602 17.1310  22
   1  -4  13 8.62201 20.8922  29
  -1   4 -14 243.378 26.3321  22
   1  -4  14 236.224 29.5593  29
  -1   4 -15 26.6558 15.6014  22
   1  -4  15 30.3761 21.1162  29
  -1  -4 -15 68.3079 24.5220   8
   1  -4  16 38.4441 18.7137  29
  -1  -4 -16 10.2074 20.2282   8
  -1  -4 -17 113.863 21.1977   8
   1  -4  17 87.4028 18.4731  29
   1  -4  18 11.4724 13.9244  24
   1  -4  18 3.11248 12.6267  29
  -1  -5  16 15.7431 13.3147  24
  -1  -5  15 46.0941 16.4426  24
  -1  -5  15 20.3181 14.9759  29
  -1  -5  14 126.488 20.9956  29
  -1  -5  14 118.556 21.3343  24
  -1  -5  13 126.046 22.6664  29
  -1  -5  13 144.235 23.5062  24
  -1  -5  12 397.833 37.9742  29
  -1  -5  12 395.026 38.3837  24
  -1  -5  11 112.260 23.2960  29
  -1  -5  11 59.5851 22.0514  24
   1   5 -11 46.9594 17.2445  22
   1   5 -10 69.1491 17.5994  22
  -1  -5  10 53.8201 22.1006  29
  -1  -5  10 44.9413 22.2561  24
   1  -5  -9 84.7062 20.6125  25
  -1  -5   9 106.926 24.0452  29
  -1  -5   9 97.2742 23.6983  24
   1   5  -9 107.651 19.1347  22
   1  -5  -8 55.1384 18.6934  25
   1   5  -8 68.4424 16.9057  22
  -1  -5   8 41.8560 21.2249  29
   1  -5  -7 39.7261 19.8022  25
  -1  -5   7 57.8957 22.5492  29
   1  -5  -6 38.2120 19.4954  25
  -1  -5   6 34.3035 20.3422  29
   1  -5  -5 390.462 38.8763  25
  -1  -5   5 432.396 39.7131  29
   1  -5  -4 767.277 55.5120   7
   1  -5  -4 749.071 54.5591  25
  -1  -5   4 667.911 53.9491  29
  -1  -5   4 504.010 68.9289   5
  -1  -5   4 583.586 58.4282  15
  -1  -5   4 496.974 62.9600   6
  -1  -5   3 65.1042 21.9536  15
   1  -5  -3 30.1942 19.0615  25
   1  -5  -3 42.3794 21.4737   7
  -1  -5   3 37.9719 20.9051   7
  -1  -5   3 7.93642 25.8893   6
   1  -5  -2 16.3427 20.5222  25
  -1  -5   2 4.44788 23.5216   1
  -1  -5   2 23.8339 20.9572   7
   1  -5  -2-10.1255 20.6185   7
   1  -5  -2 17.6918 22.9270   1
  -1  -5   2 9.97304 18.2610  15
  -1  -5   2 11.7631 26.9239   6
  -1  -5   1 131.408 28.5924   1
   1  -5  -1 143.572 25.3019   7
   1  -5  -1 115.295 29.4687   1
   1  -5  -1 137.377 23.5062  25
  -1  -5   1 158.041 24.1281   7
  -1  -5   1 70.0288 30.5551   6
   1  -5   0-6.18616 19.6663  25
   1  -5   0 4.52124 21.9462   1
  -1  -5   0 7.84496 18.6484   7
  -1  -5   0 8.67022 21.7644   1
   1  -5   0-8.11827 29.1316   6
   1  -5   0-4.06270 20.1178   7
  -1  -5   0 3.88319 27.5708   6
   1  -5   1 113.739 32.5494   6
   1  -5   1 114.089 30.4221   1
   1  -5   1 106.276 24.0379   7
  -1  -5  -1 117.051 23.2160   7
  -1  -5  -1 118.976 30.7751   1
   1  -5   1 78.9272 22.6908  25
   1  -5   2 4.62726 24.2364   1
   1  -5   2 20.4738 30.7746   6
   1  -5   2 37.7668 22.6312  25
   1  -5   2 14.3621 20.8430   7
  -1  -5  -2 13.6707 19.0900   7
  -1  -5  -2-4.23734 22.1970   1
  -1  -5  -3 77.8413 22.3216   7
   1  -5   3 29.7382 21.3662  25
   1  -5   3 74.1848 22.5286   7
   1  -5   3 107.757 29.9034   6
   1  -5   4 603.670 54.2648  25
  -1  -5  -4 681.548 51.5772  25
   1  -5   4 507.631 62.6833   6
   1  -5   4 672.517 71.2111   5
  -1  -5  -4 689.316 53.3172   7
  -1  -5  -5 283.659 29.2176  25
   1  -5   5 241.780 31.5640  25
  -1  -5  -6 10.7487 17.4482  25
   1  -5   6 2.17264 21.2194  25
  -1  -5  -7 61.7035 18.2832  25
   1  -5   7 56.5290 21.9336  25
  -1  -5  -8 27.4003 17.0687  25
  -1   5  -8 20.7543 15.8005  22
   1  -5   8 25.9367 22.1669  25
   1  -5   9 65.9013 21.7478  25
  -1   5  -9 92.9600 18.2563  22
   1  -5   9 77.6857 22.4360  29
  -1   5 -10 41.0015 16.1944  22
   1  -5  10 31.7995 19.6657  29
  -1   5 -11 71.0274 17.5012  22
   1  -5  11 81.6682 22.0359  29
  -1   5 -12 487.660 38.0076  22
   1  -5  12 378.763 39.0796  29
   1  -5  13 124.916 22.6158  29
  -1   5 -13 114.951 18.4804  22
  -1   5 -14 115.515 16.7735  22
   1  -5  14 76.5483 19.4011  29
   1  -5  15 11.3526 15.1383  24
   1  -5  15 22.0893 15.4999  29
  -1   5 -15 34.7475 12.4976  22
   1  -5  16-3.02643 12.7838  24
   1  -5  16-3.09052 12.5549  29
  -1  -6  13 51.8478 13.4062   7
  -1  -6  13 74.0093 14.2866  29
  -1  -6  12 74.6738 15.9455   7
  -1  -6  12 58.9240 15.3497  29
  -1  -6  11 23.3240 15.6887  29
  -1  -6  11 17.2804 14.6521   7
  -1  -6  10 16.6397 15.2815  29
  -1  -6  10 22.2851 15.9099   7
  -1  -6   9 113.252 22.1835   7
  -1  -6   9 207.109 23.7779  29
   1  -6  -8 255.092 25.9260  25
  -1  -6   8 201.633 25.6074  29
  -1  -6   8 217.491 26.7781   7
  -1  -6   7 132.502 20.9953  29
   1  -6  -7 142.611 21.1524  25
  -1  -6   6 397.901 40.2560   7
   1  -6  -6 473.905 40.4745  25
  -1  -6   6 529.600 41.5631  29
  -1  -6   5 65.3103 20.2373   7
   1  -6  -5 82.7835 18.6521  25
   1  -6  -4 30.2784 18.2930  25
  -1  -6   4 23.4547 18.2114   7
   1  -6  -3 938.934 66.2752  25
  -1  -6   3 785.375 65.1098   7
  -1  -6   2 988.673 77.6721   7
   1  -6  -2 1004.72 77.8372  25
   1  -6  -2 1167.20 79.0157   7
  -1  -6   1 99.9781 21.6940   7
   1  -6  -1 83.6641 21.9102   7
   1  -6  -1 137.473 22.4045  25
  -1  -6   0 29.2944 19.7162   7
   1  -6   0 30.1410 19.5611   7
   1  -6   0 10.0583 18.0511  25
   1  -6   1 119.526 24.2503  25
  -1  -6  -1 156.697 24.2489   7
   1  -6   1 126.936 23.5288   7
   1  -6   2 1018.82 78.2193   7
   1  -6   2 968.922 77.4914  25
  -1  -6  -2 1154.01 78.3638   7
   1  -6   3 812.884 59.7457   7
   1  -6   3 678.297 58.6646  25
   1  -6   4 23.9915 19.7315   7
   1  -6   4 15.9801 19.6584  25
   1  -6   5 64.2533 20.0654  25
   1  -6   5 68.6259 21.2660   7
  -1  -6  -5 74.6641 17.2920  25
   1  -6   6 409.047 39.1414   7
  -1  -6  -6 455.578 36.9637  25
   1  -6   6 400.121 39.0525  25
   1  -6   7 60.0551 19.6141  25
   1  -6   7 86.4969 21.1367   7
   1  -6   8 227.347 27.4612   7
   1  -6   9 153.634 22.5188   7
  -1   6 -10 26.7978 12.3007  22
   1  -6  10 20.9471 16.0143   7
  -1   6 -11 20.4329 11.5069  22
   1  -6  11-1.33429 14.4017   7
  -1   6 -12 60.3095 12.2122  22
   1  -6  12 32.1725 14.5311   7
   1  -6  12 49.5097 14.4117  29
   1  -6  13 65.2723 13.7397  29
   1  -6  13 63.8614 13.5350   7
  -1  -7   8 174.507 18.5403   7
  -1  -7   7 61.0957 13.5356   7
  -1  -7   6 86.9316 15.4790   7
   1  -7  -6 103.465 14.9639  25
   1  -7  -5 29.8480 12.3471  25
  -1  -7   5 15.4611 13.3485   7
   1  -7  -4 30.3698 12.4879  25
  -1  -7   4 6.26110 13.2311   7
  -1  -7   3 285.322 28.6109   7
   1  -7  -3 358.567 28.8675  25
  -1  -7   2 436.528 36.1624   7
   1  -7  -2 443.475 35.7762  25
   1  -7  -1 174.781 20.0450  25
  -1  -7   1 144.074 19.3498   7
   1  -7   0 1.34892 13.2093  25
   1  -7   1 126.620 17.8652  25
   1  -7   1 103.206 18.0603   7
   1  -7   2 407.517 34.6475   7
   1  -7   2 418.548 34.4752  25
   1  -7   3 370.908 30.8076   7
   1  -7   3 314.522 29.4301  25
   1  -7   4 23.3268 13.0798  25
   1  -7   4 6.34475 13.2861   7
   1  -7   5 43.5901 13.8251  25
   1  -7   5 26.4596 13.6317   7
   1  -7   6 84.3274 15.0028   7
   1  -7   7 24.5868 12.4697   7
   1  -7   8 204.019 20.2526   7
   2   0 -20 29.9078 15.8541  26
   2   0 -19-3.09574 16.4861  26
   2   0 -18 212.719 26.9872  31
   2   0 -18 233.786 27.7745  26
   2   0 -17 10.3375 19.8809  31
   2   0 -17-9.69313 19.8843  26
   2   0 -16 25.9139 20.7509  26
   2   0 -16 14.2295 20.6073  31
   2   0 -15 5.26029 19.4837  31
   2   0 -15 17.7302 19.1954  26
   2   0 -14 574.552 45.7529  31
   2   0 -14 468.350 45.6189  26
   2   0 -13 3.46415 19.0658  26
   2   0 -13-21.6298 20.5589  31
   2   0 -13 4.60901 25.0751  19
   2   0 -12 978.000 69.4038  31
   2   0 -12 763.507 78.3027  19
   2   0 -12 987.290 70.3699  26
   2   0 -11-21.6128 21.4979  19
   2   0 -11 11.7706 19.3269  12
   2   0 -11 4.24080 16.9704  26
   2   0 -11 11.2988 17.0098  31
   2   0 -10 662.306 58.4926  19
   2   0 -10 675.129 55.0209  12
   2   0  -9 3.61483 16.2234  12
   2   0  -9 2.06597 15.4474  14
   2   0  -9 8.07002 18.7870  19
   2   0  -8 2562.63 181.025  14
   2   0  -8 2731.05 180.210  12
   2   0  -8 2683.59 182.907  19
   2   0  -7 1.98796 14.9430  19
   2   0  -7 14.0323 14.8078  12
   2   0  -7 8.19587 14.7697  14
   2   0  -6 8348.46 544.486  14
   2   0  -6 8278.59 545.564  19
   2   0  -5 25.9312 13.9823  14
   2   0  -5 18.4269 14.2666  19
   2   0  -4 91.1348 17.3303  14
   2   0  -4 112.475 16.8770  19
   2   0  -3 18.6158 10.9749  19
   2   0  -3 1.02797 12.7078  14
   2   0  -2 9530.91 626.755  19
   2   0  -2 9752.47 627.245  14
   2   0  -1 3.32602 11.9455  14
   2   0  -1 10.0723 8.80642  19
   2   0   0 5697.67 381.275  14
  -2   0   0 6068.78 383.397  20
  -2   0  -1 15.0359 16.0466  20
  -2   0  -2 9408.48 613.688  20
  -2   0  -3 12.4267 12.4538  13
  -2   0  -3 26.5661 10.9146  10
  -2   0  -4 54.8648 13.3287  13
  -2   0  -4 44.0404 13.2863  10
  -2   0  -5 12.8667 11.6882  10
  -2   0  -5 24.4706 15.2660   9
   2   0   5 9.73457 13.7823  17
  -2   0  -6 8633.51 532.140  10
  -2   0  -6 8325.31 531.974   9
   2   0   6 7466.51 531.674  17
  -2   0  -7 2.87995 16.0379   9
   2   0   7 16.6723 14.9412  17
  -2   0  -8 2483.74 164.380   9
   2   0   8 2339.44 163.863  17
  -2   0  -9-3.63976 16.3885   9
   2   0   9 3.95547 16.1037  17
  -2   0 -10 845.813 61.9517   9
   2   0  10 700.449 61.0434  17
  -2   0 -11-5.84841 12.7019  36
  -2   0 -11 11.4903 19.8420   9
  -2   0 -11 21.7576 15.1043  34
  -2   0 -12 915.761 68.6622  34
  -2   0 -12 933.749 67.8003  36
  -2   0 -12 987.976 74.4738   9
  -2   0 -13-5.76648 15.4353  36
  -2   0 -13-19.8677 20.8042   9
  -2   0 -14 556.150 50.1813  34
  -2   0 -14 648.709 49.3872  36
  -2   0 -15 1.63036 16.2478  36
  -2   0 -15 20.2387 18.9844  31
  -2   0 -16 32.8519 18.4301  36
  -2   0 -16 16.8945 18.4923  31
  -2   0 -17 17.3120 17.3443  26
  -2   0 -17-1.63706 18.6241  31
  -2   0 -18 277.303 28.2410  26
  -2   0 -18 241.024 27.9367  31
  -2   0 -19 28.5241 16.3780  31
  -2   0 -19-9.44154 14.8156  26
  -2   0 -20 28.0301 14.4497  31
  -2  -1  20 116.328 23.3870  39
   2  -1 -20 161.653 19.8131  26
   2  -1 -19 166.999 23.5733  26
   2  -1 -18-5.26577 18.1002  26
   2  -1 -17 436.535 39.8544  31
   2  -1 -17 484.597 42.0833  26
   2   1 -17 459.612 41.0838  31
   2  -1 -16 60.5792 20.8565  31
   2   1 -16 89.1137 21.8830  31
   2  -1 -16 78.6523 22.3772  26
   2   1 -15 4479.30 294.368  31
   2  -1 -15 4403.39 294.031  31
   2  -1 -15 4379.99 295.416  26
   2   1 -14 3297.09 213.039  31
   2  -1 -14 3164.63 212.737  31
   2  -1 -14 3021.37 213.890  26
   2  -1 -13 2129.73 142.579  31
   2   1 -13 2130.24 142.746  31
   2   1 -13 1909.87 155.112  19
   2  -1 -13 2051.69 143.374  26
   2   1 -12 14.1854 18.1406  31
   2   1 -12 20.5109 22.5799  19
   2  -1 -12 23.5959 18.6239  31
   2  -1 -12 45.1497 19.7963  26
   2  -1 -11 2770.29 179.378  31
   2   1 -11 2729.41 185.952  12
   2   1 -11 2592.24 179.119  31
   2   1 -11 2544.95 188.957  19
   2  -1 -11 2683.59 180.093  26
   2   1 -10 3253.67 210.842  12
   2   1 -10 3110.30 213.665  19
   2  -1 -10 2837.61 213.896  19
   2  -1  -9 10678.2 739.085  19
   2   1  -9 11748.4 736.256  12
   2   1  -9 11123.9 738.889  19
   2   1  -8 4193.04 272.064  19
   2  -1  -8 3849.36 269.331  14
   2   1  -8 4171.03 269.648  12
   2  -1  -8 3914.97 272.356  19
   2  -1  -7 166.279 23.1004  14
   2   1  -7 192.334 24.2747  12
   2  -1  -7 160.430 24.4441  19
   2   1  -7 174.649 24.0157  19
   2  -1  -6 388.410 35.7523  14
   2  -1  -6 412.276 37.3774  19
   2  -1  -5 25229.5 1646.48  14
   2  -1  -5 25497.8 1647.49  19
   2  -1  -4 4940.23 326.446  19
  -2   1   3 1380.47 100.663  20
   2  -1  -3 1467.17 99.3014  19
  -2   1   2 2117.68 147.256  20
   2  -1  -2 2166.56 144.614  19
  -2   1   1 90025.4 5841.51  20
  -2  -1   1 90305.9 5837.94  10
  -2   1   0 198515. 12657.6  20
   2  -1   0 194867. 12656.8  21
  -2  -1   0 195385. 12654.4  10
   2  -1   0 195063. 12653.0  17
   2  -1   1 89773.1 5874.35  21
  -2   1  -1 92039.5 5875.16  20
  -2  -1  -1 89708.7 5872.46  10
   2  -1   1 91373.3 5871.27  17
  -2   1  -2 2229.47 164.884  13
   2  -1   2 2483.12 165.626  21
  -2  -1  -2 2495.53 163.025  10
   2  -1   2 2494.08 161.988  17
   2  -1   3 1608.73 105.010  17
  -2   1  -3 1454.45 107.485  13
  -2   1  -4 5408.68 345.559  13
  -2   1  -4 5055.97 343.165   9
   2  -1   4 5282.42 343.145  17
  -2   1  -5 25806.2 1647.53   9
   2  -1   5 24966.5 1647.57  17
  -2   1  -6 492.933 38.4942   9
   2  -1   6 427.724 37.8854  17
  -2   1  -7 210.116 24.5067   9
   2  -1   7 190.503 23.4082  17
   2   1   7 168.494 23.6680  17
  -2  -1  -8 4294.15 266.614  11
  -2   1  -8 4002.75 264.773   9
   2  -1   8 3866.28 264.883  17
   2   1   8 3756.09 264.703  17
  -2   1  -9 11038.5 715.513   9
  -2  -1  -9 11326.2 715.617   9
   2  -1   9 10391.6 715.941  17
  -2   1 -10 3181.63 210.048   9
  -2  -1 -10 3064.57 209.268   9
   2  -1  10 3001.40 210.269  17
  -2   1 -11 2550.96 169.292  36
  -2   1 -11 2525.06 169.307  32
  -2   1 -11 2731.29 175.563   9
  -2  -1 -11 2547.62 170.057  34
   2  -1  11 2406.60 175.614  17
  -2  -1 -11 2438.75 168.653  36
  -2   1 -12 2.74257 14.7002  36
  -2  -1 -12 23.7925 16.1966  34
  -2  -1 -12 5.17697 14.5590  36
  -2   1 -12 61.0572 22.5307   9
  -2   1 -12 39.7032 14.7925  32
   2  -1  12 9.33511 22.1334  17
  -2  -1 -13 2033.41 140.120  36
  -2   1 -13 2031.99 140.614  32
  -2  -1 -13 2077.62 141.776  34
  -2   1 -13 2140.31 140.938  36
  -2   1 -13 1994.59 147.536   9
  -2  -1 -14 3047.94 201.567  34
  -2   1 -14 2918.77 200.170  36
  -2   1 -15 4529.66 285.764  31
  -2  -1 -15 4475.03 285.316  31
  -2   1 -15 4088.08 285.064  36
  -2  -1 -15 4067.15 285.842  34
  -2  -1 -16 105.553 20.6314  31
  -2   1 -16 72.5142 19.4239  36
  -2   1 -16 71.1616 22.5667  31
  -2   1 -17 478.775 40.8457  36
  -2   1 -17 529.107 42.1731  31
  -2  -1 -17 448.167 40.7944  31
  -2   1 -18 47.6511 18.1076  26
  -2   1 -18 50.2649 18.3205  31
  -2  -1 -18 57.6763 17.7797  31
  -2  -1 -19 197.237 21.7880  31
  -2   1 -19 185.969 22.2488  31
  -2   1 -19 163.691 22.5092  26
  -2  -1 -20 207.396 21.0627  31
  -2   1 -20 216.089 22.0242  31
  -2   1 -20 201.836 22.0667  26
  -2  -2  20 4.04627 18.3841  37
  -2  -2  19 47.7565 22.7365  37
   2  -2 -18 3.09445 16.0354  26
   2  -2 -17 19.4159 17.8633  26
   2  -2 -16 545.431 47.0494  26
   2  -2 -15 154.503 25.2877  26
   2  -2 -14 150.079 25.8647  26
   2  -2 -13 726.751 57.9956  26
   2  -2 -12 52.2855 20.4492  26
   2   2 -12 57.2331 24.6696  19
   2  -2 -12 74.7775 36.6411  16
   2  -2 -11 1413.60 107.775  16
   2   2 -11 1253.36 102.376  19
   2   2 -11 1366.35 99.2801  12
   2  -2 -11 1238.85 92.9631  26
   2   2 -10 39.0047 23.0322  12
   2  -2 -10 26.4065 27.3370  16
   2   2 -10 39.1266 24.7879  19
   2   2 -10 42.0298 15.9428  22
   2  -2 -10 13.9491 18.5110  26
   2   2  -9 16.2928 20.6240  12
   2  -2  -9 31.6667 26.3871  16
   2   2  -9 3.23211 19.6056  19
   2  -2  -8 365.841 42.4123  16
   2   2  -8 336.901 36.0267  12
   2  -2  -7 6294.40 425.610  21
   2  -2  -7 6450.92 428.997  16
   2   2  -7 6460.63 422.890  12
  -2  -2   6 72.9240 17.0106  15
   2  -2  -6 106.029 24.8481  16
   2   2  -6 118.220 20.5248  12
   2  -2  -6 125.445 24.0761  21
  -2  -2   5 38.5415 15.1962  15
   2  -2  -5 72.5098 22.4894  16
  -2  -2   4 4468.88 307.068  15
  -2   2   4 4172.90 308.532  20
   2  -2  -4 5060.71 310.764  21
   2  -2  -4 5065.25 311.438  16
  -2  -2   3 1633.50 108.504  15
   2  -2  -3 1590.68 112.033  21
  -2   2   3 1368.50 110.368  20
   2  -2  -3 1685.77 113.448  16
  -2  -2   2 181.510 21.2049  15
   2  -2  -2 190.449 28.1331  21
  -2   2   2 172.143 26.1474  20
  -2  -2   1 190.337 21.8373  15
   2  -2  -1 205.584 28.6227  21
  -2   2   1 241.147 27.4571  20
  -2  -2   0 1307.22 87.7629  11
   2  -2   0 1369.43 92.6728  21
  -2  -2   0 1158.84 87.4340  15
  -2  -2  -1 217.425 23.1983  11
   2  -2   1 264.898 31.8489  21
  -2   2  -1 303.126 28.3004  13
  -2   2  -2 151.628 22.9611  13
  -2  -2  -2 170.033 19.9582  11
  -2   2  -3 1536.17 104.733  13
  -2  -2  -3 1481.32 102.983  11
   2  -2   3 1426.11 100.901  17
  -2   2  -4 4925.99 311.375  13
  -2  -2  -4 4592.66 309.677  11
   2  -2   4 4553.03 307.705  17
  -2  -2  -5 55.5541 16.4928  11
   2  -2   5 79.6932 17.6709  17
  -2  -2  -6 118.650 19.8561  11
   2  -2   6 173.074 22.3147  17
  -2  -2  -7 6192.03 402.667  11
   2  -2   7 5692.34 401.902  18
   2  -2   7 6300.58 401.342  17
  -2  -2  -8 348.603 33.8666  11
   2  -2   8 239.741 31.8538  17
  -2  -2  -9 15.6765 14.5284  34
  -2   2  -9 31.2137 12.3773  32
  -2  -2  -9 11.4273 16.4295  11
   2  -2   9 7.56007 19.9573  17
  -2   2 -10 24.1611 15.8466  36
  -2   2 -10 10.2305 12.9584  32
  -2  -2 -10 17.1636 14.1300  34
   2  -2  10 25.6166 23.2029  17
  -2  -2 -11 1185.50 81.0791  34
  -2   2 -11 1084.96 79.6244  32
  -2   2 -11 1178.31 80.3268  36
   2  -2  11 997.568 87.3284  17
  -2   2 -12 64.5099 17.6546  36
  -2  -2 -12 43.7082 17.8969  34
  -2   2 -12 62.3335 16.5327  32
  -2  -2 -13 559.779 48.2327  34
  -2   2 -13 634.916 48.2907  36
  -2   2 -14 176.901 22.3584  36
  -2  -2 -14 98.9686 21.5004  34
  -2   2 -15 195.082 24.9060  36
  -2  -2 -15 220.322 26.1582  34
   2  -2  15 154.313 29.1164  29
  -2   2 -16 654.785 48.0880  36
  -2  -2 -16 627.270 48.5177  34
   2  -2  17 48.3406 21.0535  29
  -2   2 -19 33.9606 15.0291  26
  -2   2 -20 32.9883 12.7573  26
  -2  -3  19 416.050 37.5871  37
  -2  -3  18 91.2073 25.1063  37
  -2  -3  17 26.7097 24.8647  37
  -2  -3  16 81.1307 29.6378  37
  -2  -3  15 1576.93 112.677  24
  -2  -3  14 2145.49 149.742  24
  -2  -3  13 567.452 47.6437  24
   2  -3 -13 458.827 43.4581  26
  -2  -3  12 521.199 48.3283  24
   2  -3 -12 518.970 46.2673  26
  -2  -3  11 1968.75 138.842  24
   2   3 -11 1948.24 136.531  22
   2   3 -11 2061.64 150.781  19
   2  -3 -11 1991.86 137.485  26
   2  -3 -11 1997.65 157.139  16
   2   3 -10 732.069 57.2433  22
   2   3 -10 746.285 69.0066  19
   2  -3 -10 767.727 58.2403  26
   2  -3 -10 694.113 73.7794  16
   2   3  -9 1994.97 141.437  22
   2  -3  -9 2211.25 160.486  16
  -2  -3   9 2134.85 143.657  29
   2  -3  -8 392.785 50.9531  16
   2   3  -8 406.362 32.7524  22
  -2  -3   8 289.333 34.3498  29
  -2  -3   7 632.210 58.7512  37
   2  -3  -7 789.618 70.0016  16
   2   3  -7 740.865 53.2243  22
  -2  -3   7 746.283 56.0371  29
  -2  -3   7 674.339 59.2592  15
   2  -3  -6 707.146 69.1790  16
  -2  -3   6 781.257 60.5463  15
  -2  -3   5 3591.48 252.319  15
   2  -3  -5 3897.43 256.038  21
   2  -3  -5 3797.70 261.033  16
   2  -3  -4 8011.68 489.628  21
  -2  -3   4 6917.87 484.807  15
  -2  -3   3 42.4566 15.5000  15
   2  -3  -3 47.9642 23.3377  21
  -2  -3   2 233.706 28.4212  15
  -2  -3   1 4386.85 292.969  15
  -2  -3   0 10987.7 708.435  15
   2  -3   0 10657.2 708.463  18
  -2   3  -1 3968.83 276.219  13
  -2  -3  -1 4234.10 275.645  15
   2  -3   1 4169.24 276.292  18
  -2   3  -2 186.027 27.1525  13
  -2  -3  -2 217.807 26.8253  11
   2  -3   2 228.200 29.4233  18
  -2  -3  -3 42.8376 15.8623  11
   2  -3   3 53.4958 19.1291  18
  -2  -3  -4 6237.41 423.146  11
   2  -3   4 6516.24 423.634  18
  -2  -3  -5 3774.47 255.357  11
   2  -3   5 3755.00 255.208  18
  -2  -3  -6 702.016 59.0095  11
   2  -3   6 681.887 58.7815  18
   2  -3   7 671.098 49.5549  33
  -2  -3  -7 625.720 56.7452  11
   2  -3   7 582.689 55.6769  18
  -2  -3  -7 655.328 49.8609  34
  -2  -3  -8 468.001 36.9984  34
   2  -3   8 423.487 37.7952  33
  -2  -3  -8 396.173 44.0530  11
   2  -3   9 2013.24 144.741  33
  -2  -3  -9 2258.17 144.931  34
  -2  -3  -9 2071.71 153.215  11
  -2  -3 -10 603.576 62.3777  11
  -2  -3 -10 743.227 53.6286  34
   2  -3  10 670.584 55.7434  29
  -2  -3 -11 1765.66 123.043  34
   2  -3  11 1784.55 125.624  29
  -2  -3 -12 370.810 35.6087  34
   2  -3  12 387.358 40.2484  29
  -2  -3 -13 498.829 42.4570  34
   2  -3  13 505.890 47.3799  29
  -2  -3 -14 1927.79 134.223  34
   2  -3  14 1968.45 137.396  29
   2  -3  15 1592.70 114.041  29
   2  -3  16 71.3868 22.6873  29
   2  -3  17 41.4378 19.0597  29
  -2   3 -18 170.416 20.8733  26
   2  -3  18 139.391 21.4623  29
  -2   3 -19 590.700 43.6873  26
  -2  -4  17 33.4852 16.1618  24
  -2  -4  17 11.5706 20.0083  37
  -2  -4  16 10.6906 22.0374  37
  -2  -4  16 7.57421 17.5607  24
  -2  -4  15 303.502 35.9140  37
  -2  -4  15 278.680 31.3387  24
  -2  -4  14 16.0067 25.5858  37
  -2  -4  14 19.7308 20.4294  24
  -2  -4  13 31.7564 27.0584  37
  -2  -4  13 96.8107 24.1333  24
  -2  -4  12 357.312 42.7594  37
  -2  -4  12 338.373 36.1946  29
  -2  -4  12 351.568 37.9746  24
  -2  -4  11 320.662 41.6150  37
  -2  -4  11 295.628 35.2966  24
  -2  -4  11 309.255 34.4184  29
  -2  -4  10 76.5028 29.6780  37
  -2  -4  10 57.6115 24.8510  24
   2   4 -10 48.7812 18.1845  22
  -2  -4  10 39.8717 21.7310  29
  -2  -4   9 32.9829 22.3080  24
  -2  -4   9 22.5196 27.6075  37
   2   4  -9 38.5312 17.2995  22
  -2  -4   9 22.6705 21.3431  29
  -2  -4   8 153.611 34.5651  37
  -2  -4   8 193.076 28.9464  24
   2   4  -8 166.875 23.9453  22
  -2  -4   8 208.425 29.5884  29
  -2  -4   7 1796.91 126.426  37
  -2  -4   7 1856.17 122.917  24
   2   4  -7 1656.56 119.786  22
  -2  -4   7 1596.78 127.819  15
  -2  -4   7 1826.24 123.186  29
  -2  -4   6 57.5417 28.9664  37
  -2  -4   6 76.3367 21.0213  24
   2   4  -6 74.1436 17.6103  22
  -2  -4   6 93.6573 21.8871  29
  -2  -4   6 116.057 23.9040  15
  -2  -4   5 25.3556 18.2729  15
   2  -4  -5 30.8436 19.2300  25
  -2  -4   5 46.8673 21.5586  29
  -2  -4   5 8.97555 26.8505  37
  -2  -4   4 90.2340 28.1266  37
   2  -4  -4 83.9870 21.5357  25
  -2  -4   4 118.469 22.3019  29
  -2  -4   4 96.9922 22.6540  15
  -2  -4   3 1641.28 126.450  15
   2  -4  -3 1792.33 123.575  25
  -2  -4   3 1822.82 122.885  29
   2  -4  -2 57.0360 22.0790  25
  -2  -4   2 67.0360 19.7045  15
  -2  -4   2 75.1098 22.0917  29
  -2  -4   2 48.6667 23.1542  27
  -2  -4   1 825.111 71.7327  15
   2  -4  -1 879.523 69.3029  25
  -2  -4   1 981.550 70.7238  27
  -2  -4   1 985.963 68.9966  29
  -2  -4   0 1194.51 92.1349  15
  -2  -4   0 1330.53 89.8727  29
   2  -4   0 1102.56 89.8414  25
  -2  -4   0 1332.05 90.5808  27
   2  -4   1 833.364 65.8881  18
  -2  -4  -1 963.545 65.1251  27
   2  -4   2 72.6245 22.1714  18
  -2  -4  -2 111.691 25.1786  27
   2  -4   2 68.1234 21.2499  25
  -2  -4  -3 1799.42 123.144  34
   2  -4   3 1783.92 129.435  18
  -2  -4  -4 104.472 18.8118  34
  -2  -4  -4 84.4264 23.3977  11
   2  -4   4 137.799 25.4444  18
  -2  -4  -5 3.58576 19.7006  11
   2  -4   5 50.6721 23.1358  18
  -2  -4  -5 74.8399 17.6242  34
  -2  -4  -6 76.7700 18.8696  34
  -2  -4  -6 117.930 24.6351  11
   2  -4   6 96.3447 26.8206  18
  -2  -4  -7 1748.42 116.573  34
  -2  -4  -7 1614.75 126.330  11
   2  -4   7 1590.13 124.591  18
  -2  -4  -8 270.698 26.4485  34
   2  -4   8 139.971 33.1534  18
  -2  -4  -9 71.0280 17.6996  34
   2  -4   9 53.1153 22.3771  29
   2  -4  10 26.6860 21.5048  29
   2  -4  11 375.137 38.3357  29
   2  -4  12 364.236 37.8109  29
  -2   4 -13 64.9915 17.5704  22
   2  -4  13 43.1454 22.5496  29
  -2   4 -14 7.67146 15.4229  22
   2  -4  14 17.3821 19.9771  29
  -2   4 -15 388.090 31.0718  22
   2  -4  15 270.948 32.6283  29
   2  -4  16 15.1877 17.0782  29
   2  -4  17 33.4016 15.1183  29
  -2  -5  15 25.8410 14.8853  24
  -2  -5  15 13.4969 14.6157  27
  -2  -5  14 36.7937 17.8612  24
  -2  -5  14 46.0451 15.8762  29
  -2  -5  13-23.8083 23.2477  37
  -2  -5  13 32.2781 18.7792  24
  -2  -5  13 4.64911 16.6672  29
  -2  -5  12 253.042 28.4240  24
  -2  -5  12 217.033 27.4900  29
  -2  -5  12 182.082 32.3724  37
  -2  -5  11 150.787 28.9039  37
  -2  -5  11 97.7409 23.7683  24
  -2  -5  10 494.849 50.9790  37
  -2  -5  10 527.557 46.7932  29
  -2  -5  10 593.294 47.7799  24
  -2  -5   9 345.661 41.5638  37
  -2  -5   9 336.958 36.1146  24
  -2  -5   9 402.635 37.1981  29
   2  -5  -8 136.193 23.9790  25
  -2  -5   8 127.542 24.9230  24
  -2  -5   8 150.157 26.1136  29
   2  -5  -7 42.7884 17.9111  25
  -2  -5   7 29.2901 20.7429  29
   2  -5  -6 334.393 34.6818  25
  -2  -5   6 355.802 37.6204  27
  -2  -5   6 335.638 36.4186  29
   2  -5  -5 1878.34 126.242  25
  -2  -5   5 1858.71 126.149  29
  -2  -5   5 1628.24 125.720  27
   2  -5  -4 3598.42 244.863  25
  -2  -5   4 3745.72 244.921  29
  -2  -5   4 3567.68 245.161  27
  -2  -5   3 1035.93 75.1044  29
  -2  -5   3 1015.68 75.9896  27
   2  -5  -3 917.035 74.5283  25
   2  -5  -2 1199.73 87.5908  25
  -2  -5   2 1190.80 86.8695  29
  -2  -5   2 1132.40 87.9096  27
   2  -5  -1 318.042 33.7283  25
  -2  -5   1 304.790 33.7821  29
  -2  -5   1 296.677 34.8561  27
   2  -5   0 1422.42 107.038  25
  -2  -5   0 1573.82 108.201  27
   2  -5   1 318.219 35.7974  25
  -2  -5  -1 306.223 36.2056  27
  -2  -5  -2 1205.93 84.4319  34
   2  -5   2 1108.21 86.7969  25
  -2  -5  -3 1036.22 72.6806  34
   2  -5   3 919.873 75.6719  25
   2  -5   4 2989.96 224.922  25
  -2  -5  -4 3562.35 222.645  34
   2  -5   5 1353.48 109.543  25
  -2  -5  -5 1648.30 106.972  34
   2  -5   6 239.666 32.5509  25
   2  -5   7 38.6209 22.1958  25
   2  -5   8 94.2244 25.3197  25
   2  -5   9 223.365 31.7821  25
   2  -5  10 412.378 41.4767  25
   2  -5  11 142.580 26.0590  25
  -2   5 -11 206.321 23.0405  22
   2  -5  11 167.540 25.4712  29
  -2   5 -12 272.133 25.8495  22
   2  -5  12 270.600 28.3465  29
   2  -5  13 35.4521 18.0334  25
  -2   5 -13 15.5681 13.9626  22
   2  -5  13 22.7827 16.8549  29
   2  -5  14 39.6839 16.4603  25
  -2   5 -14 66.0971 14.1833  22
   2  -5  14 30.5560 15.8148  29
   2  -5  15 3.32537 13.5447  29
  -2   5 -15 23.5166 10.9454  22
  -2  -6  12 4.22886 12.6942  29
  -2  -6  11 29.8325 14.5599  29
  -2  -6  10 44.8235 16.2234  29
  -2  -6   9 33.7497 16.9460  29
   2  -6  -8 60.9332 16.2331  25
  -2  -6   8 55.7257 18.3106  29
   2  -6  -7 134.825 21.4367  25
  -2  -6   7 207.658 24.6426  29
  -2  -6   6 8.86443 17.0133  29
  -2  -6   6 1.65702 18.1548  27
   2  -6  -6 5.02367 14.8268  25
   2  -6  -5 40.3757 16.3635  25
  -2  -6   5 36.1820 18.5223  29
  -2  -6   5 54.9543 20.2111  27
   2  -6  -4 203.040 23.8082  25
  -2  -6   4 107.455 24.0966  27
   2  -6  -3 47.1906 17.9553  25
  -2  -6   3-1.79424 20.5003  27
   2  -6  -2 709.346 55.7329  25
  -2  -6   2 686.366 55.6125  27
   2  -6  -1 134.483 22.7875  25
   2  -6   0 345.274 33.2779  25
  -2  -6   0 280.815 28.4973  34
   2  -6   1 91.3012 21.5994  25
  -2  -6  -1 115.316 17.8740  34
   2  -6   2 584.280 49.1743  25
   2  -6   3 6.13427 18.8482  25
   2  -6   4 112.278 22.8931  25
   2  -6   5-1.97590 18.9016  25
   2  -6   6 9.52221 18.3908  25
   2  -6   7 161.513 24.4968  25
   2  -6   8 29.2583 18.5586  25
   2  -6   9 1.58297 16.4884  25
   2  -6  10 36.9217 16.6692  25
  -2   6 -10 48.8383 12.9700  22
   2  -6  11 12.1696 13.7180  25
  -2   6 -11 24.0544 11.3965  22
  -2   6 -12 12.5116 9.55956  22
  -2  -7   7 0.69882 7.98044  34
  -2  -7   6 288.997 23.7753  34
   2  -7  -5 230.726 21.6673  25
   2  -7  -4 1168.01 80.9399  25
   2  -7  -3 466.524 36.8147  25
   2  -7  -2 148.215 18.4423  25
   2  -7  -1 143.012 18.4555  25
   2  -7   0 15.1943 12.8204  25
   2  -7   1 130.844 17.9273  25
   2  -7   2 105.140 16.8275  25
   2  -7   3 286.207 27.0101  25
   2  -7   4 1026.73 72.4803  25
   2  -7   5 183.075 19.9579  25
   2  -7   6 362.593 30.1805  25
   2  -7   7-0.90649 10.1544  25
  -3   0  20 98.3737 19.9019  39
  -3   0  19 15.1559 20.1553  39
   3   0 -18 61.5756 18.6270  26
   3   0 -17-1.75115 18.1479  26
   3   0 -16 77.2766 22.0964  26
   3   0 -15-5.81160 19.5603  26
   3   0 -14 271.361 31.9743  26
   3   0 -13-15.1314 20.0139  31
   3   0 -12 1864.74 124.618  31
   3   0 -12 1628.96 136.702  19
   3   0 -11 13.0865 18.6349  31
   3   0 -11 16.8945 24.6353  19
   3   0 -10 2407.62 176.810  14
   3   0 -10 2606.87 175.076  12
   3   0 -10 2542.23 169.865  31
   3   0 -10 2484.64 180.284  19
   3   0  -9-2.71587 19.3875  14
   3   0  -9 15.6733 19.3287  12
   3   0  -9-6.52179 21.9910  19
   3   0  -8 34.4090 18.9105  12
   3   0  -8 41.8650 20.5337  14
   3   0  -8 8.49669 17.4987  19
   3   0  -7 11.0950 17.7687  14
   3   0  -7-2.44868 16.4154  19
   3   0  -6 3968.80 266.859  19
   3   0  -6 3978.29 266.565  14
   3   0  -5 47.5629 17.7224  14
   3   0  -5 20.1032 15.2629  19
   3   0  -4 19046.2 1227.53  14
   3   0  -4 18698.1 1226.89  19
   3   0  -3 36.9423 17.5556  14
   3   0  -2 4932.61 321.068  14
  -3   0   2 4759.46 323.274  20
   3   0  -1 45.4549 15.4894  14
  -3   0   1 16.7662 19.0861  20
  -3   0   0 3.71043 18.9300  20
   3   0   0-5.04921 13.5415  14
  -3   0  -1-1.79852 16.7876  20
  -3   0  -2 5175.27 343.019  20
  -3   0  -3 17.5622 15.5479  13
  -3   0  -3 34.0385 14.3806  10
  -3   0  -4 17520.1 1140.51  10
  -3   0  -5 18.3484 12.4611  10
   3   0   5 16.4541 15.7338  17
  -3   0  -6 4401.56 285.681  10
   3   0   6 4170.11 285.356  17
   3   0   7 18.0334 17.3225  17
  -3   0  -7 12.0049 14.9141  10
   3   0   8 32.7168 19.6891  17
   3   0   9-9.74325 18.2208  17
  -3   0 -10 2415.43 155.247  36
  -3   0 -10 2220.79 155.746  34
  -3   0 -10 2466.52 156.137  32
   3   0  10 1989.80 160.802  17
  -3   0 -11-3.78103 13.1608  36
  -3   0 -11-4.42406 14.8875  34
  -3   0 -11 5.69273 13.8162  32
   3   0  11 6.00550 21.4351  17
  -3   0 -12 1689.00 113.616  36
  -3   0 -12 1582.42 114.640  34
  -3   0 -12 1732.17 114.323  32
   3   0  12 1513.87 121.251  17
  -3   0 -13 29.7593 15.9491  36
  -3   0 -13-1.73629 15.9754  34
  -3   0 -14 206.132 25.5637  36
  -3   0 -14 243.463 27.8093  34
  -3   0 -15 11.0400 15.5920  36
  -3   0 -16 85.5187 20.9161  31
  -3   0 -16 75.1056 19.0424  36
  -3   0 -17-4.47119 17.3411  31
  -3   0 -18 56.0869 17.7012  31
  -3   0 -19 1.07573 13.7231  31
  -3   0 -20 182.711 19.1491  31
  -3  -1  19 1.47341 20.0220  39
   3  -1 -18 416.388 34.4772  26
  -3  -1  18 298.630 37.2301  39
   3  -1 -17 71.1430 20.7837  26
   3  -1 -16 628.884 51.7891  26
   3  -1 -15 307.472 33.5511  26
   3  -1 -14 26.1264 21.5217  26
   3  -1 -13 325.017 33.9052  26
   3   1 -12 59.6288 25.8381  12
   3   1 -12 28.5887 26.1522  19
   3  -1 -12 68.1829 21.8059  26
   3   1 -11-17.2667 21.3905  14
   3   1 -11 3.04617 22.9982  12
   3  -1 -11 30.9107 20.2226  26
   3   1 -11 5.86485 18.5182  31
   3   1 -11 4.22896 23.4288  19
   3   1 -10 711.868 56.0843  12
   3   1 -10 592.873 55.3245  14
   3   1 -10 610.633 48.4021  31
   3   1 -10 600.890 56.7385  19
   3  -1 -10 580.300 49.6145  26
   3   1  -9 623.924 56.0791  14
   3   1  -9 755.141 57.7130  12
   3  -1  -9 578.679 58.2475  19
   3   1  -9 691.913 59.6115  19
   3  -1  -9 633.065 51.0379  26
   3   1  -8 2021.65 143.564  14
   3   1  -8 2120.18 142.820  12
   3  -1  -8 1843.34 144.347  19
   3   1  -8 2119.11 145.070  19
   3  -1  -7 647.028 56.6004  19
   3   1  -7 674.590 55.0136  19
   3  -1  -6 1628.87 123.074  19
   3   1  -6 1860.75 123.753  19
  -3   1   5 25.0332 20.9890  20
   3   1  -5 36.6687 15.3752  19
  -3   1   4 183.758 28.3888  20
  -3   1   3 1653.35 118.977  20
  -3   1   2 4168.69 280.553  20
  -3   1   1 222.692 29.7328  20
   3  -1   0 13.2694 19.5455  21
  -3   1   0 2.18359 18.5718  20
  -3  -1   0 1.23305 10.0840  10
   3  -1   1 239.463 28.2698  21
  -3   1  -1 182.916 27.4356  20
  -3  -1  -1 224.212 22.4649  10
  -3  -1  -2 4410.16 291.211  10
   3  -1   2 4388.42 289.520  17
  -3   1  -3 1830.98 128.941  13
  -3  -1  -3 1919.52 127.119  10
   3  -1   3 1802.28 125.287  17
  -3   1  -4 191.319 24.7941  13
  -3  -1  -4 192.459 23.4383  10
   3  -1   4 189.525 23.0258  17
  -3   1  -5 36.8088 16.7902  13
   3  -1   5 12.5103 14.0070  17
  -3   1  -6 1726.82 118.628  10
   3  -1   6 1674.38 118.383  17
   3  -1   7 717.569 55.9037  17
   3   1   7 679.805 56.7778  17
   3  -1   8 1883.06 128.469  17
   3   1   8 1743.43 128.585  17
  -3  -1  -9 708.001 48.4171  34
  -3   1  -9 609.137 46.7201  36
  -3   1  -9 612.408 47.2611  32
  -3  -1  -9 693.692 54.5993  11
   3  -1   9 531.268 51.9089  17
   3   1   9 551.065 52.9732  17
  -3   1 -10 619.443 46.9558  36
  -3  -1 -10 568.645 47.2429  34
  -3   1 -10 634.305 46.8321  32
   3  -1  10 597.969 54.7910  17
   3   1  10 594.951 53.5409  17
  -3  -1 -11-9.32080 15.5992  34
  -3   1 -11 9.59845 14.0654  36
  -3   1 -11 7.39133 13.6683  32
   3  -1  11 3.16582 21.7327  17
  -3  -1 -12 104.289 19.5827  34
  -3   1 -12 73.8422 18.2058  32
  -3   1 -12 127.856 19.9172  36
   3  -1  12 76.8887 28.0875  17
  -3  -1 -13 309.540 29.4947  36
  -3   1 -13 306.033 31.0812  36
  -3  -1 -13 378.238 33.2674  34
  -3   1 -13 301.285 30.5221  32
  -3  -1 -14 27.8805 15.6731  36
  -3   1 -14 33.8972 17.4165  36
  -3  -1 -14 48.3782 18.5616  34
  -3   1 -14 31.6138 15.8337  32
  -3   1 -15 281.702 30.1514  36
  -3  -1 -15 321.727 32.4247  34
  -3   1 -16 625.755 47.2558  36
  -3  -1 -16 486.842 46.8476  34
  -3   1 -16 595.705 47.2963  31
  -3  -1 -16 610.582 47.0222  31
  -3   1 -17 35.6882 16.7470  36
  -3   1 -17 89.4901 19.6515  31
  -3  -1 -17 54.6787 17.6215  31
  -3   1 -18 501.739 38.8366  31
  -3  -1 -18 427.833 37.8375  31
  -3   1 -18 488.314 39.0534  26
  -3   1 -19 6.97996 13.2877  31
  -3  -1 -19 13.2221 12.3921  31
  -3   1 -19 15.2766 13.4167  26
  -3  -2  19 15.3986 19.8074  37
  -3  -2  19 5.71011 17.5618  39
  -3  -2  18 187.753 29.8558  37
  -3  -2  18 249.686 28.8691  39
  -3  -2  17 10.5354 25.5690  37
  -3  -2  17 100.792 24.4933  39
  -3  -2  16 532.453 48.7574  39
  -3  -2  15 29.5666 25.4556  39
   3  -2 -15-1.96137 18.8838  26
   3  -2 -14 103.246 23.5921  26
   3  -2 -13 159.737 27.0920  26
   3  -2 -12 164.981 28.0732  26
   3  -2 -11 234.963 44.1210  16
   3   2 -11 243.375 37.2309  14
   3   2 -11 272.190 36.8648  12
   3   2 -11 315.374 42.8452  19
   3  -2 -11 258.995 31.6938  26
   3  -2 -10 1230.09 110.087  16
   3   2 -10 1363.32 104.195  12
   3   2 -10 1461.83 109.560  19
   3  -2 -10 1394.88 98.5168  26
   3  -2  -9 593.961 62.8653  16
  -3  -2   9 619.998 51.2474  24
   3   2  -9 698.390 57.7730  12
   3   2  -9 697.222 60.4930  19
   3  -2  -9 570.320 50.9200  26
   3  -2  -8 2346.94 166.920  16
  -3  -2   8 2189.78 155.909  24
   3   2  -8 2469.07 161.153  12
   3  -2  -8 2387.24 164.632  21
   3   2  -8 2411.01 165.106  19
   3  -2  -8 2161.88 155.185  26
   3   2  -7 1181.64 86.1600  12
   3  -2  -7 1073.83 88.9729  21
   3  -2  -6 137.012 28.3515  21
  -3   2   6 126.443 27.5260  20
   3  -2  -5 2127.86 140.017  21
  -3   2   5 1757.32 137.153  20
   3  -2  -4 2794.89 178.811  21
  -3   2   4 2332.35 176.596  20
   3  -2  -3 1379.19 93.2460  21
  -3   2   3 1087.73 91.1958  20
   3  -2  -2 728.064 58.2065  21
  -3   2   2 585.134 56.6108  20
   3  -2  -1 3582.16 225.031  21
  -3   2   1 3022.47 223.046  20
   3  -2   0 46.3890 23.0880  21
  -3   2  -1 3116.06 226.558  13
   3  -2   1 3623.49 229.041  21
  -3   2  -2 484.083 44.5830  13
  -3   2  -3 1097.35 83.4981  13
  -3   2  -4 2705.11 187.194  13
  -3  -2  -5 1850.91 132.709  11
   3  -2   5 1919.57 130.825  17
  -3  -2  -6 96.6236 20.8296  11
   3  -2   6 158.401 22.3966  17
  -3  -2  -7 1083.97 87.8719  11
   3  -2   7 1250.21 87.4202  17
  -3  -2  -8 2154.48 139.976  34
  -3   2  -8 2184.53 139.708  36
  -3   2  -8 1988.91 138.685  32
  -3  -2  -8 2016.06 146.825  11
   3  -2   8 1905.01 139.311  28
   3  -2   8 2170.19 145.943  17
  -3  -2  -9 652.179 48.6255  34
  -3   2  -9 618.874 48.5380  36
   3  -2   9 614.184 49.8167  33
  -3   2  -9 648.200 47.7613  32
  -3  -2  -9 569.909 55.1794  11
   3  -2   9 586.976 55.6511  17
  -3   2 -10 1256.54 88.1818  36
  -3  -2 -10 1252.44 88.5628  34
  -3   2 -10 1242.38 87.8204  32
  -3  -2 -10 1316.31 97.6015  11
   3  -2  10 1163.45 95.9975  17
  -3   2 -11 250.521 26.4439  36
  -3  -2 -11 217.381 25.7070  34
  -3   2 -11 249.799 25.4868  32
   3  -2  11 198.480 36.0339  17
  -3   2 -12 166.896 21.9850  36
  -3  -2 -12 140.732 22.6181  34
  -3   2 -12 135.143 21.1032  32
  -3   2 -13 178.014 22.4837  36
  -3  -2 -13 124.935 22.4379  34
  -3   2 -13 152.841 21.8896  32
  -3   2 -14 124.664 20.4051  36
  -3  -2 -14 90.2780 20.8254  34
  -3   2 -15 26.6385 16.8097  36
  -3  -2 -15 46.5560 17.8363  34
  -3   2 -16 766.268 54.5990  36
  -3  -2 -16 687.481 54.5490  34
   3  -2  16 651.801 57.3807  29
  -3   2 -17 71.0153 16.3695  36
   3  -2  17 33.1014 19.9630  29
   3  -2  18 200.830 24.9692  29
  -3   2 -19 9.85807 11.9588  26
   3  -2  19 6.74771 14.0399  29
  -3  -3  18 15.4500 19.2763  37
   3  -3 -18 43.7693 13.0602  23
  -3  -3  17 67.2052 23.4924  37
  -3  -3  16-10.3742 23.8028  37
  -3  -3  15 2.31550 27.2632  37
  -3  -3  14 245.565 37.2011  37
  -3  -3  14 212.002 30.2747  24
  -3  -3  13 20.5447 28.2851  37
  -3  -3  13 17.1874 22.8012  24
  -3  -3  12 98.2424 32.0394  37
  -3  -3  12 85.2797 25.3865  24
  -3  -3  11 61.1212 30.6849  37
  -3  -3  11 67.1763 24.5809  24
  -3  -3  10 56.8142 30.5611  37
  -3  -3  10 48.4340 24.8240  24
  -3  -3   9 56.9547 29.0598  37
  -3  -3   9 135.305 25.6156  24
   3   3  -9 122.677 30.6915  19
  -3  -3   8 31.7814 29.6309  37
  -3  -3   8 38.4345 21.4654  24
  -3  -3   7 19.5392 27.2489  37
  -3  -3   7 16.4066 21.0657  24
  -3  -3   6 64.6210 26.2559  37
  -3  -3   6 58.8291 21.1459  24
   3  -3  -6 85.6641 29.2320  21
  -3  -3   6 23.0086 19.1695  29
  -3  -3   5 20.1301 25.8729  37
  -3  -3   5 79.1198 21.7135  24
   3  -3  -5 28.9950 26.4754  21
  -3  -3   5 50.9959 20.1633  29
  -3  -3   4 1189.19 89.7860  37
  -3  -3   4 1160.68 85.8631  24
   3  -3  -4 1178.87 86.4636  23
   3  -3  -4 1357.84 96.6521  21
   3  -3  -3 615.233 58.1747  21
   3  -3  -2 1321.84 102.230  21
  -3   3   1 27.0922 19.7272  13
  -3   3   0 16.4377 19.7945  13
  -3   3  -1 33.6538 20.8733  13
  -3   3  -2 1090.71 84.1794  13
  -3   3  -3 595.047 50.7799  13
  -3  -3  -3 503.041 46.9618  11
  -3  -3  -4 1140.53 82.3167  34
  -3  -3  -4 1263.35 82.7988  35
  -3  -3  -4 1068.26 88.1100  11
   3  -3   4 1237.00 82.9482  33
   3  -3   4 1122.65 81.9588  28
  -3  -3  -5 77.0690 18.0514  34
   3  -3   5 65.0094 17.2722  33
  -3  -3  -5 47.7952 19.5904  11
  -3  -3  -5 61.7583 17.1650  35
   3  -3   5 57.3336 16.1131  28
   3  -3   5 81.6655 24.0522  18
  -3  -3  -6 80.6693 17.7717  35
  -3  -3  -6 40.9929 15.0352  34
   3  -3   6 72.2816 17.5566  33
  -3   3  -6 33.7661 17.0205  36
  -3  -3  -6 22.6527 18.6370  11
   3  -3   6 28.2835 15.7725  28
   3  -3   6 48.1232 23.9324  18
  -3   3  -7-10.1750 15.9955  36
  -3  -3  -7 1.52453 14.8859  34
   3  -3   7 6.40043 15.8910  33
  -3  -3  -7 6.92540 17.0022  11
   3  -3   7-6.00267 15.1090  28
   3  -3   7 3.40218 21.0703  18
  -3  -3  -8 12.7218 14.5375  34
   3  -3   8 11.8752 15.9505  33
  -3  -3  -8 44.8329 20.1858  11
  -3   3  -8 31.1841 16.5154  36
  -3  -3  -9 123.799 18.9568  34
   3  -3   9 89.1094 19.6710  33
  -3  -3  -9 96.0737 23.7463  11
  -3   3  -9 105.595 20.0326  36
  -3   3 -10 21.8733 16.4797  36
   3  -3  10 24.0600 18.1618  33
  -3   3 -10 34.6983 14.4068  32
  -3  -3 -10-3.44005 15.0036  34
  -3   3 -11 87.4590 19.8273  36
  -3  -3 -11 109.310 19.0636  34
   3  -3  11 94.5068 21.4180  33
  -3   3 -12 95.3851 19.0353  36
  -3  -3 -12 109.395 19.3001  34
   3  -3  12 54.3681 23.1707  29
  -3   3 -13 6.21285 16.3221  36
  -3  -3 -13 10.5960 16.2968  34
   3  -3  13 30.5520 22.2825  29
  -3   3 -14 169.031 21.8958  36
  -3  -3 -14 176.935 23.0714  34
   3  -3  14 138.042 25.7029  29
  -3   3 -15 38.0142 15.3055  36
  -3  -3 -15 15.5663 15.4799  34
   3  -3  15 3.95329 19.7348  29
  -3  -3 -16 15.0184 13.2229  34
   3  -3  16 21.1236 18.7795  29
  -3  -3 -17 119.938 16.4264  34
   3  -3  17 74.2423 19.5033  29
  -3   3 -18 40.0944 12.8530  26
   3  -3  18 37.9796 14.9962  29
  -3  -4  16 44.1926 21.0556  37
  -3  -4  15 86.0122 24.8999  37
  -3  -4  14 14.6349 25.0992  37
  -3  -4  14-14.1186 19.4224  24
  -3  -4  13 829.387 69.1554  37
  -3  -4  13 913.150 66.2834  24
   3  -4 -13 797.178 63.2186  23
  -3  -4  12 255.755 31.0818  24
   3  -4 -12 168.543 25.9517  23
  -3  -4  12 242.285 33.6427  37
  -3  -4  11 22.8706 27.1242  37
  -3  -4  11-8.60584 21.3246  24
   3  -4 -11 66.3692 20.4128  23
  -3  -4  10-5.17095 27.8533  37
  -3  -4  10 41.2977 23.3235  24
   3  -4 -10 42.2217 19.8747  23
  -3  -4  10 16.1040 20.0653  29
  -3  -4   9 818.633 68.9048  37
  -3  -4   9 767.525 64.0763  24
   3  -4  -9 795.655 63.4895  23
  -3  -4   9 830.946 63.5072  29
  -3  -4   8 639.202 58.5934  37
  -3  -4   8 620.439 54.6549  24
  -3  -4   8 658.302 53.8744  29
   3  -4  -8 634.258 52.9323  23
  -3  -4   7 15.1772 28.7925  37
  -3  -4   7 28.6665 21.7381  24
  -3  -4   7 30.1348 21.2775  29
   3  -4  -7 4.03197 20.5000  23
  -3  -4   6 99.4662 31.7808  37
  -3  -4   6 98.8397 24.2797  24
   3  -4  -6 107.432 24.1551  23
  -3  -4   6 118.628 24.3277  29
  -3  -4   5 1322.64 94.6338  37
  -3  -4   5 1204.25 89.3565  24
   3  -4  -5 1270.55 89.5876  23
  -3  -4   5 1134.46 88.5176  29
  -3  -4   4 621.150 51.3061  24
   3  -4  -4 687.084 52.8349  23
  -3  -4   4 581.048 51.0553  29
   3  -4  -3 223.907 28.0509  23
  -3  -4   3 187.520 26.9161  29
  -3  -4   3 232.309 30.3976  27
   3  -4  -2 18.9833 20.3453  23
  -3  -4   2 51.9667 20.8239  29
  -3  -4   2 36.1821 22.8870  27
   3  -4  -1 170.279 25.5305  23
  -3  -4   1 200.993 29.2744  27
  -3  -4   0-30.3421 23.0640  27
   3  -4   1 183.409 28.3123  25
   3  -4   1 176.271 28.4390  18
  -3  -4  -1 207.515 29.3509  27
   3  -4   2 16.4664 22.6270  25
   3  -4   2 40.6841 20.0759  18
  -3  -4  -2 55.7508 22.9866  27
  -3  -4  -3 240.197 23.6468  35
  -3  -4  -3 187.854 23.9805  34
   3  -4   3 219.824 31.7407  18
  -3  -4  -4 565.683 47.4236  34
   3  -4   4 674.888 48.6435  33
   3  -4   4 581.565 56.3675  18
  -3   4  -5 930.389 71.5813  36
  -3  -4  -5 918.987 72.1084  34
   3  -4   5 1082.88 72.6501  33
  -3  -4  -5 970.138 81.1503  11
   3  -4   5 1031.03 82.8875  18
  -3  -4  -6 102.860 20.6947  34
   3  -4   6 155.121 21.7094  33
   3  -4   6 122.322 28.2328  18
  -3  -4  -7 27.3348 17.0116  34
  -3  -4  -8 624.162 49.5845  34
  -3  -4  -9 786.457 60.0511  34
  -3  -4 -10 22.2725 16.2058  34
  -3  -4 -11 1.66711 14.3398  34
   3  -4  11 5.87110 18.7778  29
   3  -4  12 203.783 28.6492  29
  -3  -4 -12 216.007 23.8427  34
  -3  -4 -13 696.284 56.8629  34
   3  -4  13 873.316 60.8028  29
  -3   4 -14-4.00938 13.6724  22
  -3  -4 -14-1.32772 13.5118  34
   3  -4  14 3.35358 17.5095  29
  -3  -4 -15 68.7636 14.0319  34
   3  -4  15 97.1652 18.9870  29
   3  -4  16 73.4757 16.9703  29
  -3  -5  14 99.2022 18.3504  27
  -3  -5  13 64.5909 18.1324  27
  -3  -5  12 21.8087 15.7886  29
  -3  -5  12 42.1736 19.2789  27
  -3  -5  11-1.64005 16.3332  29
  -3  -5  10 18.3077 19.7517  24
  -3  -5  10 58.9484 19.5948  29
  -3  -5   9 325.102 34.7019  24
  -3  -5   9 388.846 34.8794  29
  -3  -5   9 282.447 34.4396  27
  -3  -5   8 207.317 28.9987  24
  -3  -5   8 260.703 29.1926  29
  -3  -5   8 226.466 29.8505  27
  -3  -5   7 172.198 25.5797  29
  -3  -5   7 103.030 25.2524  27
  -3  -5   6 793.288 60.6015  29
  -3  -5   6 719.271 61.0704  27
  -3  -5   5 156.971 27.0471  29
  -3  -5   5 190.371 29.3743  27
  -3  -5   4 2.06840 20.3348  29
  -3  -5   4 31.1299 22.9606  27
  -3  -5   3 1318.62 96.4727  27
   3  -5  -2 1410.76 103.132  25
  -3  -5   2 1451.44 103.787  27
   3  -5  -1 200.382 28.5481  25
  -3  -5   1 207.817 29.3295  27
   3  -5   0 2.19361 21.1714  25
  -3  -5   0-2.08088 22.2682  27
  -3  -5  -1 196.531 25.2851  34
   3  -5   1 216.009 31.1853  25
   3  -5   2 1234.92 93.9727  25
  -3  -5  -2 1294.15 90.7547  34
  -3  -5  -3 1133.80 75.8149  34
   3  -5   3 890.834 78.0431  25
   3  -5   4 27.3797 22.9153  25
  -3  -5  -4-1.69972 15.9725  34
  -3  -5  -5 131.901 20.3998  34
   3  -5   5 96.1619 25.7869  25
  -3  -5  -6 855.970 60.7337  34
   3  -5   6 720.953 63.4711  25
   3  -5   7 165.572 27.8700  25
  -3  -5  -7 129.456 19.9239  34
  -3  -5  -8 241.672 24.9705  34
   3  -5   8 191.731 28.5747  25
   3  -5   9 177.888 30.6567  25
  -3  -5  -9 328.445 27.2550  34
   3  -5  10 51.3586 20.1542  25
  -3  -5 -10 50.0821 14.0085  34
   3  -5  11 38.3063 19.1615  25
  -3  -5 -11 3.78549 11.6963  34
  -3   5 -12 39.7585 14.2391  22
   3  -5  12 9.83567 16.9068  25
   3  -5  13 66.8683 17.7836  25
  -3   5 -13 100.236 15.2806  22
   3  -5  14 64.5139 17.0338  25
  -3   5 -14 123.439 14.5870  22
  -3  -6  11 3.68375 12.8826  27
  -3  -6  10 65.2912 15.7121  27
  -3  -6   9 1.23372 15.3903  27
  -3  -6   8 172.636 22.3444  27
  -3  -6   7 51.3048 19.4813  27
  -3  -6   6-21.7424 18.3754  27
  -3  -6   5 51.9585 19.3360  27
   3  -6  -4 36.1988 16.1746  25
  -3  -6   4 21.8224 18.1102  27
   3  -6  -3-1.67350 15.6294  25
  -3  -6   3 22.3437 18.2681  27
   3  -6  -2 24.4035 16.3972  25
  -3  -6   1 29.3806 13.9306  34
   3  -6  -1 1.79833 17.0341  25
   3  -6   0 23.9161 17.2868  25
  -3  -6   0-1.46721 13.2225  34
  -3  -6  -1 32.0161 13.7816  34
   3  -6   1 31.7637 18.1509  25
   3  -6   2 18.8522 17.0926  25
  -3  -6  -2-4.29619 12.4998  34
  -3  -6  -3 15.4065 13.1664  34
   3  -6   3-1.85872 16.6338  25
   3  -6   4 23.9626 18.4793  25
  -3  -6  -4 25.7206 12.2580  34
   3  -6   5 35.6788 18.2668  25
  -3  -6  -5 59.3763 13.2441  34
   3  -6   6 1.72801 17.8163  25
  -3  -6  -6 1.21389 10.8577  34
   3  -6   7 86.3655 19.4743  25
  -3  -6  -7 75.0208 13.3232  34
   3  -6   8 81.5526 19.5957  25
   3  -6   9 24.6541 15.5909  25
   3  -6  10 24.1520 15.0165  25
  -3   6 -10 51.7809 11.4277  22
   3  -6  11 3.06852 12.4214  25
  -3   6 -11 5.35639 9.04984  22
  -3  -7   5 15.3052 8.28278  34
  -3  -7   4 55.9503 9.70604  34
   3  -7  -3 1.76362 9.84691  25
  -3  -7   3 11.7310 8.09904  34
   3  -7  -2 1.87946 9.78847  25
  -3  -7   2 0.80355 8.24232  34
   3  -7  -1 11.7708 10.1863  25
  -3  -7   1 8.94880 8.62594  34
   3  -7   0 4.04409 11.3783  25
  -3  -7   0 4.84947 8.18678  34
   3  -7   1 40.9674 12.0943  25
  -3  -7  -1 20.4725 8.90261  34
   3  -7   2 10.0844 11.2161  25
   3  -7   3 22.7644 11.0393  25
   3  -7   4 64.8323 12.5837  25
   3  -7   5 22.1137 11.1266  25
  -4   0  19 3.26573 16.8846  39
  -4   0  18 28.9476 20.6379  39
  -4   0  17 6.99275 22.7519  39
  -4   0  16 813.830 65.5156  39
  -4   0  15-15.0119 24.8667  39
  -4   0  14 5952.75 395.428  39
  -4   0  13 46.9177 26.8897  39
  -4   0  12 270.754 37.4677  39
  -4   0  11 8.37212 26.1601  39
   4   0 -11 20.2243 24.3293  14
   4   0 -11-4.80447 25.1524  19
   4   0 -10 602.597 58.7936  14
   4   0 -10 563.846 59.7040  19
  -4   0  10 641.918 53.8643  39
   4   0  -9-13.9874 22.2675  14
  -4   0   9 27.9504 26.0253  39
   4   0  -8 67.8660 25.3884  14
   4   0  -8 41.4947 22.5591  12
  -4   0   8 77.0210 26.3641  39
   4   0  -7 8.94135 21.1075  14
  -4   0   7 44.5333 24.1341  39
   4   0  -6 5447.20 364.560  14
   4   0  -5 78.8182 24.3458  14
   4   0  -4 10444.1 667.408  14
  -4   0   4 9791.71 669.825  20
   4   0  -3 13.2935 16.9504  14
  -4   0   3 39.9343 22.3948  20
   4   0  -2 741.896 54.7255  14
  -4   0   2 561.356 56.9764  20
  -4   0   1 13.5408 20.7548  20
  -4   0   0 413.918 41.9317  20
  -4   0  -1 12.7024 15.1001  10
  -4   0  -2 642.790 50.8164  10
  -4   0  -3 24.0962 16.0846  10
  -4   0  -4 10998.1 720.897  10
   4   0   4 11002.8 720.473  17
  -4   0  -5 41.1655 19.3167  10
   4   0   5 68.8987 21.3077  17
  -4   0  -6 5446.74 356.618  10
   4   0   6 5235.18 355.650  17
  -4   0  -7 22.5128 13.7137  32
  -4   0  -7-2.65455 17.3738  10
   4   0   7 15.2158 19.2533  17
  -4   0  -8 49.0298 15.0279  32
   4   0   8 62.6438 21.8000  17
  -4   0  -9 1.47916 14.1942  32
   4   0   9 8.90213 19.4010  17
  -4   0 -10 698.730 52.4620  32
   4   0  10 640.594 60.4345  17
  -4   0 -11-1.60988 14.7885  32
   4   0  11 6.97663 22.2126  17
  -4   0 -12 258.297 27.2671  36
  -4   0 -12 256.357 27.7447  32
  -4   0 -13 36.2900 15.0601  36
  -4   0 -13 10.1570 16.1834  34
  -4   0 -13 29.4227 15.3015  32
  -4   0 -14 6606.33 443.272  36
  -4   0 -14 6913.60 443.967  32
  -4   0 -15 9.81182 14.7237  36
  -4   0 -16 1063.62 75.5755  36
  -4   0 -17 14.7772 15.1737  31
  -4   0 -18 71.2843 15.4743  31
  -4   0 -19 0.77076 10.5820  31
  -4  -1  18 22.8766 20.1911  39
  -4  -1  17 155.601 27.9458  39
  -4  -1  16 288.766 35.8534  39
  -4  -1  15 239.271 35.2144  39
  -4  -1  14 40.5665 28.1372  39
  -4  -1  13 29.6275 27.8887  39
   4  -1 -12 298.445 33.4260  26
  -4  -1  12 294.012 38.9057  39
   4  -1 -11 3.74805 20.4401  26
  -4  -1  11 12.9971 27.0261  39
   4   1 -10 254.587 35.6294  12
   4   1 -10 239.126 34.3175  14
  -4   1  10 169.059 36.3409  20
   4   1 -10 195.849 35.0844  19
   4  -1 -10 210.772 28.7915  26
  -4  -1  10 243.459 34.9793  39
   4   1  -9 10.6605 23.5432  14
   4   1  -9 3.14988 23.9080  12
  -4   1   9 12.9543 25.5858  20
   4   1  -9 4.00055 23.5209  19
  -4  -1   9 42.9147 26.3639  39
   4   1  -8 1664.63 118.488  14
   4   1  -8 1907.45 119.418  12
  -4   1   8 1371.07 119.669  20
   4   1  -8 1637.85 119.014  19
  -4  -1   8 1430.54 112.265  39
   4   1  -7 101.467 24.3527  14
  -4   1   7 72.5155 28.2503  20
  -4  -1   7 83.4498 26.1922  39
   4   1  -6 2975.41 193.986  14
  -4   1   6 2814.50 197.304  20
  -4  -1   6 2667.52 188.837  39
   4   1  -5 312.699 34.0008  14
  -4   1   5 240.097 38.2256  20
   4   1  -4 1096.07 82.7200  14
  -4   1   4 1116.88 88.3053  20
  -4   1   3 1461.99 110.217  20
  -4   1   2 884.698 73.5550  20
   4  -1  -1 1396.67 99.1008  21
  -4   1   1 1236.85 99.3745  20
  -4   1   0 276.252 34.2408  20
  -4  -1   0 229.479 25.8909  10
  -4   1  -1 1253.36 92.4302  20
  -4  -1  -1 1166.03 86.2830  10
  -4   1  -2 926.295 77.4059  13
  -4  -1  -2 1085.54 75.7058  10
  -4   1  -3 1428.19 109.010  13
  -4  -1  -3 1532.61 106.343  10
  -4   1  -4 1103.13 87.8246  13
  -4  -1  -4 1220.58 86.2731  10
  -4   1  -5 293.727 33.7706  13
  -4   1  -5 246.381 30.7439  10
   4  -1   5 279.034 29.8587  17
  -4   1  -6 3077.19 203.006  10
   4  -1   6 2855.85 201.241  17
  -4   1  -7 121.270 17.9455  36
  -4   1  -7 115.240 17.5047  32
  -4  -1  -7 114.856 18.3888  32
   4   1   7 127.790 25.4017  17
   4  -1   7 109.167 22.9410  17
  -4   1  -8 1631.14 109.423  36
  -4   1  -8 1505.89 109.812  32
  -4  -1  -8 1624.08 110.171  32
   4  -1   8 1662.89 116.790  17
   4   1   8 1580.15 117.695  17
  -4   1  -9 7.82132 14.5329  36
  -4   1  -9 16.1981 13.8591  32
   4   1   9 22.1051 23.1574  17
  -4  -1  -9 22.1558 14.4494  32
   4  -1   9-2.99415 19.7191  17
  -4   1 -10 280.430 26.3468  36
  -4  -1 -10 217.948 26.7131  34
  -4   1 -10 235.863 26.4364  32
   4  -1  10 233.788 35.1108  17
   4   1  10 316.225 36.8557  17
  -4   1 -11 37.7677 16.3083  36
  -4  -1 -11 4.91229 15.2265  34
  -4   1 -11 11.4213 14.7831  32
  -4   1 -12 312.913 28.9031  36
  -4  -1 -12 266.076 29.3680  34
  -4   1 -12 294.613 29.5967  32
  -4   1 -13 26.1190 15.9670  36
  -4  -1 -13 10.5265 16.4705  34
  -4   1 -13 18.4187 15.1767  32
  -4   1 -14 44.0762 16.7451  36
  -4  -1 -14 50.4273 18.1222  34
  -4   1 -14 32.4616 14.5593  32
  -4   1 -15 363.462 32.7663  36
  -4  -1 -15 327.952 33.3225  34
  -4   1 -15 390.876 33.0924  32
  -4   1 -16 340.091 33.1774  36
  -4   1 -16 404.570 34.6391  31
  -4  -1 -16 450.098 34.8317  31
  -4   1 -17 134.378 19.3791  36
  -4   1 -17 190.154 21.6183  31
  -4  -1 -17 195.403 20.7509  31
  -4   1 -18 43.3193 13.6773  31
  -4  -1 -18 53.7171 13.3772  31
   4  -1  18 14.7432 16.5686  29
   4  -2 -18 31.8445 13.0084  23
  -4  -2  18-2.23905 16.8421  39
  -4  -2  17 92.5050 22.5259  39
  -4  -2  16 456.765 42.5860  39
  -4  -2  15 34.8349 24.3731  39
  -4  -2  14 71.0804 26.7064  39
  -4  -2  13 69.5066 28.1631  39
  -4  -2  12 195.126 32.1098  39
  -4  -2  11 140.639 31.1081  39
  -4  -2  10 4244.10 285.136  39
   4   2  -9 394.655 45.4871  14
  -4  -2   9 382.920 37.8026  24
   4   2  -9 433.137 44.8230  12
   4  -2  -9 355.943 45.7706  21
   4   2  -9 291.453 43.2328  19
  -4  -2   9 252.452 38.0826  39
   4   2  -8 2229.94 158.777  14
  -4  -2   8 2240.72 152.096  24
   4   2  -8 2700.70 160.434  12
   4  -2  -8 2169.11 162.445  21
   4   2  -8 2142.22 159.965  19
  -4  -2   8 1926.87 151.984  39
   4   2  -7 271.032 36.0947  14
   4  -2  -7 240.217 39.3872  21
  -4   2   7 259.865 39.9218  20
   4   2  -7 291.625 38.9223  19
  -4  -2   7 268.773 35.2044  39
   4   2  -6 830.047 65.5083  14
   4  -2  -6 840.561 70.4700  21
  -4   2   6 670.012 68.1212  20
  -4  -2   6 717.478 61.1209  39
   4   2  -5 927.420 67.2359  14
  -4  -2   5 710.732 59.7196  35
   4  -2  -5 969.773 74.5591  21
  -4   2   5 817.580 71.9243  20
  -4  -2   5 807.328 63.3215  39
  -4  -2   4 77.1978 18.8758  35
   4  -2  -4 82.2686 21.3937  23
   4  -2  -4 119.146 30.0208  21
  -4   2   4 77.0550 27.3027  20
   4  -2  -3 622.452 62.3200  21
  -4   2   3 664.402 61.9328  20
   4  -2  -2 6698.25 427.776  21
  -4   2   2 6042.21 425.898  20
   4  -2  -1 7188.77 454.094  21
  -4   2   1 6390.89 452.341  20
   4  -2   0 54639.7 3548.41  21
  -4   2  -1 6657.33 444.982  13
  -4   2  -2 6355.18 425.255  13
  -4   2  -3 410.617 45.4951  13
  -4  -2  -4 73.4663 18.2752  35
  -4   2  -4 72.1641 24.0936  13
   4  -2   4 111.165 18.5805  28
  -4  -2  -5 878.115 60.9863  35
  -4   2  -5 764.598 59.5702  36
  -4   2  -5 799.249 69.0824  13
   4  -2   5 817.248 60.0280  28
  -4  -2  -6 857.343 59.2105  35
  -4  -2  -6 863.295 58.5589  34
  -4  -2  -6 823.598 66.1525  11
  -4   2  -6 697.331 57.7415  36
   4  -2   6 718.895 58.0615  28
  -4   2  -7 226.521 24.8046  36
  -4  -2  -7 239.006 24.4984  34
  -4  -2  -7 211.029 31.3722  11
   4  -2   7 186.093 25.4422  28
  -4   2  -8 2168.96 138.047  36
  -4  -2  -8 2201.50 138.187  34
  -4   2  -8 1952.67 136.927  32
  -4  -2  -8 2036.61 146.758  11
   4  -2   8 1852.05 137.636  28
   4  -2   8 2103.19 145.205  17
   4   2   8 1776.13 144.841  17
  -4   2  -9 331.918 31.0526  36
  -4  -2  -9 368.656 31.6060  34
   4  -2   9 344.396 32.7773  33
  -4   2  -9 348.972 30.6378  32
  -4  -2  -9 223.427 37.0899  11
   4  -2   9 314.948 39.5735  17
   4   2   9 335.102 40.3643  17
  -4   2 -10 4999.75 318.018  36
  -4  -2 -10 4937.05 318.513  34
   4  -2  10 4537.36 318.859  33
  -4   2 -10 4725.66 317.589  32
  -4   2 -11 138.356 21.5697  36
  -4  -2 -11 65.4355 19.1874  34
   4  -2  11 79.7790 21.6049  33
  -4   2 -11 76.8796 18.0446  32
  -4   2 -12 270.723 28.1462  36
  -4  -2 -12 242.252 28.2150  34
  -4   2 -12 247.159 26.2796  32
  -4   2 -13 93.8181 18.7576  36
  -4  -2 -13 58.1572 19.4599  34
  -4   2 -13 56.3763 16.5554  32
  -4   2 -14 38.9502 16.0650  36
  -4  -2 -14 66.0116 17.7610  34
  -4   2 -15 24.9415 15.1214  36
  -4  -2 -15 42.2593 16.0707  34
  -4   2 -16 474.315 38.0677  36
  -4  -2 -16 494.066 38.7565  34
   4  -2  16 427.204 41.4334  29
  -4   2 -17 162.658 19.0851  36
   4  -2  17 149.673 22.2044  29
  -4   2 -18 38.1221 11.6179  26
   4  -2  18 31.8793 14.5614  29
   4  -3 -17-3.10654 11.6012  23
  -4  -3  16 150.668 25.7523  37
   4  -3 -16 163.105 20.8218  23
  -4  -3  15 24.4697 22.9941  37
   4  -3 -15 7.91247 15.5184  23
   4   3 -14 71.4887 15.8816  38
  -4  -3  14 44.5856 24.4928  37
  -4  -3  13 73.6664 26.8256  37
  -4  -3  12 379.702 44.2935  37
  -4  -3  11 126.309 31.9566  37
  -4  -3  10 52.2111 30.1967  37
  -4  -3  10 50.2459 24.6398  24
  -4  -3   9 19.6808 27.6361  37
  -4  -3   9 13.0137 22.9539  24
  -4  -3   8 55.4295 28.7409  37
  -4  -3   8 61.6881 25.3337  24
  -4  -3   7 789.868 69.6714  37
   4  -3  -7 883.966 67.8126  23
   4  -3  -7 929.955 79.2405  21
   4  -3  -6 57.4772 21.1964  23
   4  -3  -6 104.083 30.6964  21
   4  -3  -5 122.559 24.5564  23
   4  -3  -5 123.951 33.4009  21
   4  -3  -4 344.810 36.0785  23
   4  -3  -4 369.977 46.7111  21
   4  -3  -3 62.0725 22.9599  23
   4  -3  -3 115.576 33.1730  21
  -4  -3   2 2.75954 16.2229  35
  -4   3   2 27.9079 21.9422  13
   4  -3  -2 17.2668 20.1176  23
   4  -3  -2 59.1762 31.7756  21
  -4  -3   1 92.1697 19.3194  35
  -4   3   1 132.396 27.9236  13
   4  -3  -1 89.6213 22.2187  23
  -4  -3   0 1648.56 110.161  35
  -4   3   0 1554.66 119.440  13
   4  -3   0 1548.04 112.714  23
  -4   3  -1 88.8539 25.0498  13
  -4  -3  -1 87.2568 18.3592  35
  -4  -3  -2 19.6278 16.5326  35
  -4   3  -2 39.7941 23.5848  13
  -4  -3  -2 33.7458 14.9299  34
   4  -3   2 34.6165 14.8877  28
  -4  -3  -3 166.479 22.1269  35
  -4   3  -3 192.486 31.8078  13
  -4  -3  -3 138.155 20.2792  34
   4  -3   3 138.232 20.4283  28
  -4  -3  -4 385.954 34.5569  35
  -4  -3  -4 419.509 33.9898  34
   4  -3   4 431.879 34.7798  33
  -4  -3  -4 291.504 38.5799  11
   4  -3   4 371.670 33.6571  28
  -4   3  -5 137.522 20.9123  36
  -4  -3  -5 123.045 19.9128  35
  -4  -3  -5 119.138 19.6276  34
   4  -3   5 128.578 21.6427  33
  -4  -3  -5 108.705 23.3593  11
   4  -3   5 105.198 19.7740  28
  -4   3  -6 85.1674 19.1997  36
  -4  -3  -6 96.9401 18.5936  35
  -4  -3  -6 66.0494 17.0117  34
   4  -3   6 95.5074 19.4673  33
  -4  -3  -6 92.5932 22.4990  11
   4  -3   6 43.7093 17.3455  28
  -4   3  -7 867.398 61.9503  36
  -4  -3  -7 763.400 60.5597  34
   4  -3   7 895.438 63.0987  33
   4  -3   7 725.799 71.5999  18
   4  -3   7 789.755 61.3513  28
  -4   3  -8 61.2089 18.7361  36
  -4  -3  -8 46.5206 17.0612  34
   4  -3   8 35.2632 18.3791  33
   4  -3   8 67.5684 19.4432  28
  -4   3  -9 27.5800 16.3261  36
  -4  -3  -9 37.3098 16.9625  34
   4  -3   9 28.6271 17.9828  33
  -4   3 -10 54.7842 18.0489  36
  -4  -3 -10 65.7893 18.2827  34
   4  -3  10 63.6036 20.8064  33
  -4   3 -11 168.371 22.4073  36
   4  -3  11 125.724 23.5148  33
  -4   3 -11 159.224 19.8340  32
  -4  -3 -11 146.367 21.4379  34
  -4   3 -12 353.951 32.4497  36
  -4  -3 -12 380.113 33.1886  34
   4  -3  12 319.349 33.8838  33
   4  -3  12 319.697 35.8617  29
  -4   3 -13 108.027 18.4337  36
  -4  -3 -13 77.5707 17.9651  34
   4  -3  13 119.730 22.7813  29
  -4   3 -14 102.986 17.0186  36
  -4  -3 -14 44.4948 15.3465  34
   4  -3  14 80.6955 20.8864  29
  -4   3 -15 24.3314 13.7421  36
  -4  -3 -15 14.4350 13.5691  34
   4  -3  15 30.5966 17.6570  29
  -4   3 -16 147.916 17.1759  36
  -4  -3 -16 147.932 17.0898  34
  -4   3 -17 0.74407 9.86061  36
   4  -3  17 14.9981 12.5697  29
   4  -4 -15 361.842 31.0701  23
   4   4 -15 401.006 30.3900  38
  -4  -4  14 654.855 56.2778  37
   4  -4 -14 691.629 52.5530  23
   4   4 -14 743.803 51.8148  38
  -4  -4  13 233.201 31.6685  37
   4  -4 -13 209.997 24.3683  23
  -4  -4  12 33.9079 23.6647  37
   4  -4 -12 28.7079 16.3207  23
  -4  -4  11 130.077 28.7315  37
   4  -4 -11 119.749 21.6139  23
  -4  -4  10 31.2033 27.1840  37
   4  -4 -10 27.4343 19.2237  23
  -4  -4   9-2.47772 25.6154  37
   4  -4  -9 12.2551 18.5226  23
  -4  -4   8-17.6484 27.3015  37
   4  -4  -8 8.37669 18.7954  23
   4  -4  -7 67.9590 21.9823  23
  -4  -4   7 37.6702 20.6616  29
   4  -4  -6 1856.56 133.612  23
  -4  -4   6 1954.77 133.332  29
   4  -4  -5 203.003 27.7368  23
  -4  -4   5 146.657 29.7670  27
   4  -4  -4 4740.58 315.940  23
  -4  -4   4 4721.34 315.929  27
   4  -4  -3 1185.72 87.7785  23
  -4  -4   3 1157.44 88.1062  27
   4  -4  -2 322.624 35.5655  23
  -4  -4   2 320.781 36.9617  27
  -4  -4   1 59.5035 23.3933  27
  -4  -4   0 41.2336 15.8819  35
  -4  -4   0 63.3829 23.4811  27
  -4  -4  -1 83.4913 17.6722  35
  -4  -4  -1 56.8653 17.6241  34
  -4  -4  -1 89.2108 25.3994  27
  -4  -4  -2 395.845 32.5973  35
  -4  -4  -2 278.783 32.1271  34
  -4  -4  -3 1322.15 94.8723  35
  -4  -4  -3 1299.78 95.7475  34
   4  -4   3 1419.11 95.0940  28
  -4  -4  -4 4834.44 311.919  35
  -4  -4  -4 4553.69 312.168  34
   4  -4   4 4744.91 312.504  33
  -4   4  -5 202.553 25.5485  36
  -4  -4  -5 196.605 24.9438  34
   4  -4   5 178.333 25.1077  33
  -4   4  -6 1627.47 113.212  36
  -4  -4  -6 1534.48 112.871  34
   4  -4   6 1722.97 114.342  33
  -4   4  -7 67.3997 18.2183  36
  -4  -4  -7 54.4179 16.6754  34
   4  -4   7 59.0407 18.6790  33
  -4   4  -8-11.1486 16.5481  36
  -4  -4  -8-3.36338 14.5184  34
   4  -4   8 7.45600 16.0920  33
  -4   4  -9 12.3349 14.8457  36
  -4  -4  -9 26.3544 14.7347  34
  -4   4 -10 14.6793 14.7741  36
  -4  -4 -10 32.1072 15.4282  34
  -4   4 -11 138.487 19.0923  36
  -4  -4 -11 113.796 18.0800  34
  -4   4 -12 32.4722 14.8583  36
  -4  -4 -12 60.2956 15.2610  34
  -4   4 -13 235.198 22.1569  36
  -4  -4 -13 176.363 21.2421  34
  -4  -4 -14 592.962 48.6802  34
  -4   4 -14 760.974 49.6303  22
  -4  -4 -15 265.254 23.0937  34
   4   5 -13 159.272 15.4343  38
  -4  -5  13 109.286 18.7428  27
   4   5 -12 84.7007 13.3085  38
  -4  -5  12 79.9685 17.8852  27
   4   5 -11 144.543 16.8786  38
  -4  -5  11 104.330 21.0921  27
  -4  -5  10 72.3417 19.9126  27
  -4  -5   9 44.1589 21.0585  27
  -4  -5   8 45.1343 20.5662  27
  -4  -5   7 449.210 41.4653  27
  -4  -5   6 26.3444 19.6740  27
  -4  -5   5 71.1586 22.4845  27
  -4  -5   4 267.421 32.2209  27
  -4  -5   3-7.89470 22.0660  27
  -4  -5   2 675.109 56.2848  27
  -4  -5   1 30.9826 16.4233  34
  -4  -5   1 63.7372 22.5263  27
  -4  -5   0 14.7380 14.3230  34
  -4  -5  -1 52.4678 16.4103  34
  -4  -5  -2 606.786 47.8895  34
  -4  -5  -3 6.51435 14.0133  34
  -4   5  -4 319.605 29.5966  36
   4  -5   4 263.858 33.3977  25
  -4  -5  -4 310.726 29.1701  34
  -4   5  -5 61.2519 17.6064  36
   4  -5   5 66.3412 22.6832  25
  -4  -5  -5 56.7649 16.0123  34
   4  -5   6 38.5328 21.3911  25
  -4  -5  -6 41.3055 13.9773  34
   4  -5   7 298.538 33.9533  25
  -4  -5  -7 333.267 29.3053  34
   4  -5   8 16.9805 20.0744  25
  -4  -5  -8 16.7208 13.4526  34
   4  -5   9 23.0136 18.0389  25
  -4  -5  -9 10.4002 12.0932  34
   4  -5  10 40.6678 17.8632  25
  -4  -5 -10 59.3005 13.1156  34
   4  -5  11 94.6601 19.5888  25
  -4  -5 -11 92.3695 14.2054  34
   4  -5  12 56.6988 16.3808  25
  -4  -5 -12 45.8237 11.7400  34
   4  -5  13 97.4985 17.4402  25
  -4  -5 -13 111.001 13.8396  34
  -4  -6   9 35.8912 9.03569  34
  -4  -6   9 6.56746 13.0098  27
  -4  -6   8 126.007 18.7272  27
  -4  -6   7 24.7610 15.2769  27
  -4  -6   6 44.5592 11.5699  34
  -4  -6   6 61.1061 17.0039  27
  -4  -6   5 53.0842 13.0837  34
  -4  -6   5 39.1567 17.2735  27
  -4  -6   4 92.9037 14.9351  34
  -4  -6   3 6.01659 11.2736  34
  -4  -6   2 25.8844 12.4222  34
  -4  -6   1 278.407 25.5874  34
  -4  -6   0 7.51460 11.6265  34
  -4  -6  -1 286.876 25.6666  34
  -4  -6  -2 23.3227 12.3507  34
   4  -6   3 8.77955 15.4061  25
  -4  -6  -3 9.53953 10.9702  34
   4  -6   4 107.044 19.1354  25
  -4  -6  -4 144.164 16.6931  34
   4  -6   5 73.5874 17.2119  25
  -4  -6  -5 59.5738 12.8548  34
   4  -6   6 34.5891 15.6868  25
  -4  -6  -6 54.3670 11.5220  34
   4  -6   7 18.4871 14.1476  25
  -4  -6  -7 45.3917 10.5225  34
   4  -6   8 115.940 17.6922  25
  -4  -6  -8 138.683 14.3678  34
   4  -6   9-14.6494 11.7907  25
  -4  -6  -9 5.64915 7.82336  34
  -5   0  17-8.57798 17.6213  39
  -5   0  16 77.5570 22.6219  39
  -5   0  15 24.8543 22.8937  39
  -5   0  14 170.958 29.1197  39
  -5   0  13 33.7619 25.2321  39
  -5   0  12 277.150 35.8718  39
  -5   0  11-24.2249 25.7714  39
  -5   0  10 822.485 67.4401  39
  -5   0   9-2.11912 26.2954  39
  -5   0   8 1074.48 100.857  20
  -5   0   8 1292.02 91.8653  39
   5   0  -7-4.45533 14.6262  38
  -5   0   7-4.57460 27.0903  20
  -5   0   7 7.91159 25.5697  39
   5   0  -6 10.1851 14.2537  38
  -5   0   6-17.4008 26.9446  20
   5   0  -6 18.4408 14.7931  30
  -5   0   6-13.4137 25.3774  39
   5   0  -5-4.27385 14.0432  38
  -5   0   5-24.9765 25.9714  20
   5   0  -5-3.29246 15.9469  30
  -5   0   5-25.9917 25.0856  39
   5   0  -4 251.532 25.8640  38
  -5   0   4 278.549 33.3702  39
  -5   0   4 223.994 36.7981  20
   5   0  -4 226.656 26.3727  30
   5   0  -3 5.50485 14.0825  38
  -5   0   3 3.82800 25.8172  20
   5   0  -3-22.0868 14.8672  30
  -5   0   3 8.85284 23.1895  39
   5   0  -2 394.349 34.5199  30
  -5   0   2 319.244 43.7658  20
  -5   0   2 453.916 40.4245  39
   5   0  -1-7.69486 13.8226  30
  -5   0   1-10.4127 23.3781  39
   5   0   0-4.57688 14.2488  30
  -5   0   0-16.9962 15.9825  10
  -5   0   0 8.69841 23.1851  39
   5   0   1 6.08618 14.9553  30
  -5   0  -1 12.5445 15.4397  10
   5   0   1 10.6409 13.2978  28
  -5   0  -2 397.334 39.3639  10
   5   0   2 419.687 35.3184  28
  -5   0  -3 5.47079 16.1997  10
   5   0   3 1.38267 13.9974  28
  -5   0  -4 254.860 31.0946  10
   5   0   4 230.697 25.2033  28
  -5   0  -5-3.01621 18.8138  10
   5   0   5-2.67757 18.2741  17
   5   0   6-2.86899 20.2592  17
  -5   0  -6 1.50633 14.1486  32
  -5   0  -6 6.40010 18.5010  10
  -5   0  -7 9.38214 13.8639  32
  -5   0  -7 6.71092 19.0947  10
   5   0   7 27.0930 22.7382  17
  -5   0  -8 1205.43 83.8376  32
   5   0   8 1092.16 90.9327  17
  -5   0  -9-4.97149 14.3090  32
  -5   0 -10 946.805 69.8163  32
  -5   0 -11 11.6932 15.0618  32
  -5   0 -12 391.781 35.0496  32
  -5   0 -13 1.53308 14.2197  32
  -5   0 -14 244.961 24.9710  32
  -5   0 -15 4.82516 11.2637  32
  -5   0 -16 73.8161 16.0567  31
  -5   0 -17 0.87548 11.9145  31
  -5  -1  17 36.9669 18.1252  39
  -5  -1  16 48.8883 21.4218  39
  -5  -1  15 21.2986 23.0236  39
  -5  -1  14 142.984 28.1832  39
  -5  -1  13 17.0273 25.7194  39
  -5  -1  12 143.891 29.5525  39
  -5  -1  11 121.336 29.6256  39
   5   1 -10 1143.54 81.3363  38
  -5  -1  10 1099.06 85.6950  39
   5   1  -9 11.4730 15.0114  38
  -5  -1   9-13.2040 27.0164  39
   5   1  -8 41.8879 15.5271  38
   5   1  -8 24.1372 26.2260  14
  -5  -1   8 23.6071 27.5604  39
   5   1  -7 569.721 43.1183  38
   5   1  -7 507.616 53.1033  14
  -5   1   7 385.284 56.2490  20
  -5  -1   7 497.049 48.7401  39
   5   1  -6 64.2371 16.8169  38
   5   1  -6 73.7774 25.1139  14
  -5   1   6 55.6513 30.8429  20
   5   1  -6 38.2611 15.4556  30
  -5  -1   6-16.0436 27.1245  39
   5   1  -5 120.306 20.1935  38
  -5   1   5 182.280 35.3700  20
   5  -1  -5 106.763 19.9972  30
   5   1  -5 150.641 20.6988  30
  -5  -1   5 127.050 30.0618  39
   5   1  -4 2171.80 148.350  38
  -5   1   4 2139.19 160.972  20
   5  -1  -4 2204.07 149.479  30
   5   1  -4 2160.16 149.259  30
  -5  -1   4 2254.91 152.093  39
   5   1  -3 1268.29 86.3967  38
  -5  -1   3 1013.35 86.6027  35
   5  -1  -3 1372.46 99.7467  21
  -5   1   3 1118.09 97.6752  20
   5  -1  -3 1284.52 87.7411  30
   5   1  -3 1326.70 87.7734  30
  -5  -1   3 1252.85 90.2896  39
   5   1  -2 40.1490 15.2767  38
  -5  -1   2 33.5554 18.5925  35
  -5   1   2 20.1210 24.5590  20
   5  -1  -2 59.9697 16.1854  30
   5   1  -2 89.8653 17.1651  30
   5  -1  -2 26.7569 13.7228  28
  -5  -1   2 44.2964 24.9920  39
  -5  -1   1 761.351 66.3044  35
  -5   1   1 863.200 77.8126  20
   5  -1  -1 877.534 66.9856  30
   5   1  -1 1057.80 67.7582  30
   5  -1  -1 939.954 66.0512  28
   5   1  -1 895.703 66.0070  38
  -5  -1   1 1054.04 71.8469  39
  -5  -1   0 65.8455 20.3374  35
  -5   1   0 46.0526 26.9753  20
  -5  -1   0 33.1621 26.0570  39
   5  -1   0 43.6461 16.5627  30
   5   1   0 56.5716 17.4736  30
   5  -1   0 38.1997 15.7501  28
  -5  -1  -1 798.774 63.8519  35
   5  -1   1 915.109 64.8162  30
   5  -1   1 899.451 63.6899  28
  -5   1  -2 61.5225 24.1312  13
   5  -1   2 32.6196 15.0919  30
  -5  -1  -2 34.8540 16.9074  10
   5  -1   2 38.7452 15.1902  28
  -5   1  -3 1295.41 91.4552  10
  -5  -1  -3 1127.57 89.7150  10
   5  -1   3 1176.63 84.2577  28
  -5   1  -4 2176.66 143.057  10
   5  -1   4 1897.95 135.297  28
   5   1   5 107.947 26.5702  17
  -5   1  -5 131.524 18.7958  32
  -5   1  -5 169.886 26.5144  10
   5  -1   5 116.213 21.2661  28
  -5   1  -6 48.8473 14.5220  32
  -5   1  -6 38.7469 20.1793  10
   5  -1   6 34.7200 17.0238  28
   5   1   6 41.0438 23.5265  17
  -5   1  -7 568.444 44.9145  32
  -5  -1  -7 582.331 45.5158  32
  -5   1  -7 532.662 52.5655  10
   5   1   7 560.607 54.1182  17
  -5   1  -8 31.3186 15.2879  32
  -5  -1  -8 45.7199 16.7685  32
   5  -1   8 69.9703 24.7413  17
  -5   1  -9 8.08363 14.7059  32
  -5  -1  -9-6.58335 15.7909  32
  -5   1 -10 1018.40 71.4822  36
  -5   1 -10 927.453 72.2592  32
  -5  -1 -10 1027.04 72.4263  32
  -5   1 -11 131.569 18.8037  36
  -5   1 -11 113.943 19.3470  32
  -5  -1 -11 114.576 19.1981  32
  -5   1 -12 207.953 22.9193  36
  -5   1 -12 195.299 23.3014  32
  -5   1 -13 1.34530 13.0611  36
  -5   1 -13-6.12381 13.4575  32
  -5   1 -14 143.540 20.1491  36
  -5   1 -14 199.090 21.3647  32
  -5   1 -15 36.2414 13.6936  36
  -5   1 -15 27.1030 12.4004  32
  -5   1 -16 79.1311 14.3024  36
  -5   1 -16 88.1199 15.4872  31
  -5  -1 -16 92.2653 14.9789  31
  -5   1 -17 41.0503 11.6987  31
  -5  -1 -17 43.3825 11.6112  31
   5  -2 -16 99.3681 16.8988  23
  -5  -2  16 93.6182 20.3662  39
   5  -2 -15 54.9172 16.4595  23
  -5  -2  15 59.7655 21.7440  39
   5  -2 -14 171.996 24.3872  23
  -5  -2  14 187.618 27.7813  39
   5   2 -13 7.25531 13.3787  38
   5  -2 -13 29.6000 19.1272  23
  -5  -2  13-29.0282 24.8562  39
   5   2 -12 33.2158 14.9657  38
  -5  -2  12 14.4284 24.1438  39
   5   2 -11-8.32879 15.0024  38
  -5  -2  11 10.6936 25.4300  39
   5   2 -10 63.1126 17.1186  38
  -5  -2  10 78.2461 28.0184  39
   5   2  -9 18.8298 15.9549  38
   5  -2  -9 48.6190 21.9072  23
  -5  -2   9 6.52404 26.3508  39
   5   2  -8 64.2986 16.4807  38
  -5  -2   8 45.4285 20.5882  35
   5  -2  -8 92.1768 22.6991  23
  -5  -2   8 60.0591 26.8482  39
   5   2  -7 36.4212 16.0894  38
  -5  -2   7 66.8395 20.8904  35
   5  -2  -7 59.7162 22.3381  23
   5   2  -7 53.1727 18.5750  30
  -5  -2   7 52.7476 26.9855  39
   5   2  -6 112.691 19.8341  38
  -5  -2   6 95.7945 22.1898  35
   5  -2  -6 110.955 24.1894  23
   5  -2  -6 143.528 34.2671  21
  -5   2   6 90.3599 30.2155  20
  -5  -2   6 78.3855 27.1648  39
   5   2  -5 60.9239 16.3321  38
  -5  -2   5 56.6827 20.6367  35
   5  -2  -5 108.530 22.9251  23
   5  -2  -5 69.5758 31.2557  21
  -5   2   5 78.0958 31.1487  20
  -5  -2   5 80.9892 26.6768  39
   5   2  -4 140.856 19.7695  38
  -5  -2   4 89.6480 21.8034  35
   5  -2  -4 110.146 22.7863  23
   5  -2  -4 140.445 34.8011  21
  -5   2   4 58.6816 31.2951  20
   5  -2  -4 100.456 19.6541  30
  -5  -2   4 142.682 27.4236  39
   5   2  -3 313.656 29.9324  38
  -5  -2   3 331.945 31.5915  35
   5  -2  -3 294.114 33.0840  23
  -5  -2   3 305.828 36.6298  39
   5  -2  -3 343.660 45.4240  21
   5  -2  -3 312.312 30.6824  30
  -5   2   3 262.815 42.5768  20
   5   2  -2 1283.69 95.0823  38
  -5  -2   2 1260.71 96.3813  35
   5  -2  -2 1352.01 98.2026  23
   5  -2  -2 1565.04 111.868  21
  -5   2   2 1362.36 109.326  20
   5  -2  -2 1429.22 97.5481  30
  -5  -2   2 1537.51 100.281  39
  -5  -2   1 121.225 21.3217  35
   5  -2  -1 86.9972 22.3793  23
   5  -2  -1 132.995 20.4496  30
  -5  -2   1 153.701 27.5190  39
  -5  -2   0 9.26319 17.6338  35
   5  -2   0 11.0585 18.6097  23
  -5   2   0 31.1430 24.1118  13
   5  -2   0-5.34519 16.0486  30
   5  -2   0 2.74249 13.8102  28
  -5  -2   0-1.92436 23.8383  39
  -5  -2  -1 147.504 22.3146  35
  -5   2  -1 163.243 30.5974  13
   5  -2   1 136.358 21.5139  30
   5  -2   1 132.935 19.8981  28
  -5  -2  -2 1569.63 106.953  35
  -5   2  -2 1474.00 116.547  13
   5  -2   2 1517.44 106.044  28
  -5  -2  -3 370.141 34.1713  35
  -5   2  -3 321.336 41.9188  13
   5  -2   3 364.972 32.8356  28
  -5   2  -4 96.7921 19.0126  36
  -5  -2  -4 130.000 21.2391  35
  -5   2  -4 162.487 31.8056  13
   5  -2   4 108.526 19.9480  28
  -5   2  -5 38.3998 16.5010  36
  -5  -2  -5 89.5287 19.8370  35
  -5  -2  -5 49.6813 22.1895  11
   5  -2   5 39.1015 16.6752  28
  -5   2  -6 84.0395 17.7746  36
   5  -2   6 72.2987 19.8672  28
  -5   2  -7 47.1262 15.9157  36
   5  -2   7 36.1570 16.3962  28
  -5   2  -8 65.3695 17.0081  36
  -5   2  -8 38.4710 14.8269  32
   5  -2   8 45.4028 17.6256  28
  -5   2  -9 7.48882 14.6951  36
   5  -2   9 5.81263 17.2946  33
  -5   2  -9 16.7439 13.3634  32
   5  -2   9 26.2270 16.5494  28
  -5   2 -10 101.756 18.1636  36
  -5  -2 -10 61.6576 16.6081  34
   5  -2  10 86.9889 20.7023  33
  -5   2 -10 89.3997 16.7500  32
  -5   2 -11-5.87647 14.5992  36
  -5  -2 -11 28.4029 15.5921  34
   5  -2  11 22.5117 17.6275  33
  -5   2 -11-1.52828 13.1543  32
  -5   2 -12 16.9453 14.0517  36
  -5  -2 -12 29.4979 14.2344  34
   5  -2  12 12.3920 16.3193  33
  -5   2 -12 23.6377 13.8140  32
  -5   2 -13 25.1626 14.4937  36
  -5  -2 -13 16.1054 14.6002  34
  -5   2 -13-1.38869 12.8198  32
  -5   2 -14 174.132 19.3669  36
  -5  -2 -14 130.584 18.9966  34
  -5   2 -15 54.9567 13.2578  36
  -5  -2 -15 61.7259 13.8375  34
   5  -2  15 41.7105 17.1597  29
  -5   2 -16 68.2964 12.9905  36
   5  -2  16 60.9009 16.3077  29
   5  -3 -15 1.13668 12.3662  23
   5   3 -14 136.252 17.3742  38
   5  -3 -14 159.180 20.5654  23
   5   3 -13 177.871 20.7626  38
   5  -3 -13 195.295 23.8989  23
   5   3 -12 249.544 24.6699  38
   5  -3 -12 212.272 26.9884  23
   5   3 -11 29.6893 14.8116  38
   5  -3 -11 32.8050 19.1083  23
   5   3 -10 52.3666 15.8680  38
   5  -3 -10 59.0913 20.1541  23
   5   3  -9 145.724 21.7070  38
   5  -3  -9 211.006 26.8029  23
   5   3  -8 69.0384 16.6754  38
   5  -3  -8 32.2833 20.3950  23
   5   3  -7 15.0291 14.6935  38
   5  -3  -7 34.7100 20.2341  23
   5   3  -6 73.7956 17.4559  38
   5  -3  -6 56.4634 21.7040  23
   5   3  -5 478.341 40.8266  38
  -5  -3   5 506.071 42.4203  35
   5  -3  -5 486.534 44.4355  23
  -5  -3   4 744.678 57.7461  35
   5  -3  -4 748.212 60.3826  23
  -5  -3   3-6.39130 17.8263  35
   5  -3  -3-8.54045 20.3070  23
  -5  -3   2 162.040 23.0736  35
   5  -3  -2 108.245 24.6382  23
  -5  -3   1 154.720 22.0988  35
  -5   3   1 87.8140 27.8458  13
   5  -3  -1 69.8430 22.0581  23
  -5  -3   0 19.1351 17.4076  35
  -5   3   0 4.20253 22.0125  13
  -5  -3  -1 109.866 20.1867  35
  -5   3  -1 109.848 28.5198  13
  -5  -3  -2 199.232 25.0270  35
   5  -3   2 173.536 22.1845  28
  -5  -3  -3-12.7541 16.6116  35
   5  -3   3-1.59092 15.0416  28
  -5   3  -4 753.272 60.1782  36
  -5  -3  -4 879.683 61.3976  35
   5  -3   4 782.523 60.6387  33
   5  -3   4 797.462 60.4404  28
  -5   3  -5 433.356 42.6498  36
  -5  -3  -5 550.080 43.2729  35
   5  -3   5 529.253 43.7243  33
   5  -3   5 544.471 43.5096  28
  -5   3  -6 56.6145 18.3676  36
  -5  -3  -6 100.028 19.5599  35
  -5  -3  -6 65.2935 16.7059  34
   5  -3   6 105.657 19.9395  33
   5  -3   6 67.7496 18.5462  28
  -5   3  -7 22.2716 16.5942  36
  -5  -3  -7 25.0713 14.2827  34
   5  -3   7 13.0464 17.0175  33
   5  -3   7 29.8854 16.6796  28
  -5   3  -8 39.2349 16.4986  36
  -5  -3  -8 45.9232 14.8548  34
   5  -3   8 54.5341 18.8289  33
   5  -3   8 33.2390 17.0123  28
  -5   3  -9 197.768 22.8524  36
  -5  -3  -9 154.267 21.4078  34
   5  -3   9 168.294 24.0890  33
  -5   3 -10 44.1933 16.2680  36
  -5  -3 -10 32.2820 14.6182  34
   5  -3  10 59.9940 18.5650  33
  -5   3 -11 16.7152 15.2066  36
  -5  -3 -11 8.85484 13.8808  34
   5  -3  11 8.61286 16.4448  33
  -5  -3 -12 181.528 21.8967  34
   5  -3  12 176.472 24.1106  33
  -5   3 -13 168.945 18.9577  36
  -5  -3 -13 120.142 17.8598  34
  -5   3 -14 118.929 16.2047  36
  -5  -3 -14 106.152 15.7601  34
  -5   3 -15 10.7983 10.4118  36
  -5  -3 -15 14.5802 11.0931  34
   5   4 -13 0.95176 10.2641  38
   5  -4 -13 12.1648 12.4468  23
   5   4 -12 13.3705 11.5294  38
   5  -4 -12 1.31656 13.4789  23
   5   4 -11 3.74351 12.1193  38
   5  -4 -11-16.5484 15.1508  23
   5   4 -10 9.45562 12.4712  38
   5  -4 -10 14.9914 15.8079  23
   5   4  -9 133.951 18.2526  38
   5  -4  -9 113.421 21.5392  23
   5   4  -8 151.522 19.4425  38
   5  -4  -8 108.690 22.0196  23
   5   4  -7 278.955 26.9837  38
   5  -4  -7 258.717 31.0298  23
   5  -4  -6 357.026 35.5915  23
   5  -4  -5 29.3215 19.7017  23
   5  -4  -4 65.9104 21.7698  23
   5  -4  -3 1530.16 109.643  23
  -5  -4   2 297.590 29.3304  35
  -5  -4   1 394.529 34.9873  35
  -5  -4   0 32.7519 16.2966  35
  -5  -4  -1 547.847 44.0376  35
  -5  -4  -2 346.604 30.9392  35
  -5  -4  -2 304.280 30.2276  34
  -5  -4  -3 1550.56 104.892  35
  -5  -4  -3 1396.06 104.323  34
   5  -4   3 1566.69 104.788  28
  -5   4  -4 49.0263 17.9731  36
  -5  -4  -4 28.7858 16.2009  35
  -5  -4  -4 57.8750 16.5080  34
  -5   4  -5 4.80969 15.8365  36
  -5  -4  -5-3.10596 13.2113  34
   5  -4   5 16.8549 15.9808  33
  -5   4  -6 423.851 37.1519  36
  -5  -4  -6 441.147 36.9175  34
   5  -4   6 438.462 37.9713  33
  -5   4  -7 283.166 27.6450  36
  -5  -4  -7 252.561 26.2849  34
   5  -4   7 262.341 28.6206  33
  -5   4  -8 114.850 18.6312  36
  -5  -4  -8 123.726 18.3596  34
  -5   4  -9 147.654 19.0331  36
  -5  -4  -9 115.284 18.2923  34
  -5   4 -10 2.45449 12.9433  36
  -5  -4 -10-1.29699 11.7191  34
  -5   4 -11 5.51911 12.1798  36
  -5  -4 -11 5.92930 11.6843  34
  -5   4 -12 13.4740 11.4511  36
  -5  -4 -12 20.1897 11.1221  34
  -5   4 -13 18.6056 10.1040  36
  -5  -4 -13-0.90845 9.54744  34
  -5  -4 -14 33.1626 9.26082  34
   5   5 -10 68.8048 11.8185  38
  -5  -5  10 88.7667 16.6380  27
   5   5  -9 41.8188 13.0816  30
  -5  -5   9 44.2102 16.3243  27
  -5  -5   8 331.755 30.9621  27
  -5  -5   7 49.9965 17.3213  27
  -5  -5   6 13.2503 17.3897  27
  -5  -5   5 153.894 23.5489  27
  -5  -5   4 1.58957 18.1145  27
  -5  -5   3 5.21010 11.6566  34
  -5  -5   3 8.12500 18.2466  27
  -5  -5   2 2.67372 11.7519  34
  -5  -5   1 13.5942 12.7589  34
  -5  -5   0 28.8179 12.7428  34
  -5  -5  -1 22.0576 12.8658  34
  -5   5  -2 7.07821 14.7206  36
  -5  -5  -2 10.9786 11.9490  34
  -5   5  -3-6.89793 13.4715  36
  -5  -5  -3 1.35241 12.1797  34
  -5   5  -4 21.2740 14.4458  36
  -5  -5  -4 2.64136 11.5436  34
  -5   5  -5 159.362 19.5561  36
  -5  -5  -5 153.264 18.6962  34
  -5   5  -6 21.1882 12.8106  36
  -5  -5  -6-6.09094 10.8263  34
  -5   5  -7 27.2662 12.7087  36
  -5  -5  -7 16.0679 11.0290  34
  -5   5  -8 370.328 27.0112  36
  -5  -5  -8 263.081 25.9246  34
  -5   5  -9 33.3528 10.7629  36
  -5  -5  -9 10.6926 9.88193  34
  -5   5 -10 85.6598 12.1300  36
  -5  -5 -10 52.2500 10.8093  34
  -5  -5 -11-5.84327 8.41931  34
   5   6  -6 29.1726 9.90925  30
  -5  -6   5 9.23842 7.64643  34
  -5  -6   4 45.8188 10.7479  34
  -5  -6   3-3.31944 8.55869  34
  -5  -6   2 11.2617 8.68153  34
  -5   6   1 3.50854 9.76724  36
  -5  -6   1 7.12376 8.85053  34
  -5   6   0 16.5705 10.8288  36
  -5  -6   0-0.89966 8.81830  34
  -5   6  -1 13.6415 9.70201  36
  -5  -6  -1-0.89539 8.75025  34
  -5   6  -2 13.9153 9.69210  36
  -5  -6  -2 17.5654 8.92566  34
  -5  -6  -3 2.54687 8.38580  34
  -5  -6  -4 94.2573 11.9491  34
  -5  -6  -5 17.2808 8.43529  34
  -5  -6  -6 13.0113 7.39391  34
  -6   0  15 13.5204 13.6483  35
  -6   0  14 132.754 23.0096  39
  -6   0  13-6.53954 20.3269  39
  -6   0  12 177.375 27.8568  39
  -6   0  11 36.9324 22.7847  39
  -6   0  10 213.941 31.4263  39
  -6   0   9 8.38220 24.1368  39
  -6   0   8 826.160 66.8535  39
  -6   0   7 29.6902 24.6465  39
   6   0  -6 1335.23 99.2094  30
  -6   0   6 1479.10 102.772  39
   6   0  -5 11.7605 16.1160  30
  -6   0   5 18.8218 25.6868  39
   6   0  -4 619.743 50.8765  30
   6   0  -4 638.397 49.7699  28
  -6   0   4 641.332 55.3949  39
  -6   0   3-13.3761 18.9730  35
   6   0  -3-3.88483 15.9463  30
   6   0  -3 9.38192 14.4566  28
  -6   0   3 6.16346 24.7099  39
   6   0  -2 67.4179 19.0177  30
   6   0  -2 28.3592 16.5271  28
  -6   0   2 36.7853 26.3524  39
   6   0  -1 11.4535 16.3039  30
   6   0  -1 4.76186 15.1922  28
   6   0   0 132.412 22.0247  30
   6   0   0 142.417 21.1387  28
   6   0   1-1.87994 17.0474  30
   6   0   1-9.68622 15.8578  28
   6   0   2 8.14888 15.9223  28
   6   0   3-6.58214 15.4134  28
   6   0   4 511.729 43.0300  28
  -6   0  -5-11.2987 14.5366  32
   6   0   5 10.0108 16.2455  28
  -6   0  -6 1248.48 88.6958  32
  -6   0  -7-3.30236 13.8837  32
  -6   0  -8 654.114 50.9932  32
  -6   0  -9 17.8304 14.1931  32
  -6   0 -10 175.366 21.7067  32
  -6   0 -11-1.48017 12.9644  32
  -6   0 -12 133.014 18.2045  32
  -6   0 -13-7.19954 11.6581  32
  -6   0 -14 135.905 16.1554  32
  -6   0 -15 2.41337 9.01262  32
  -6  -1  15 451.443 37.8675  39
  -6  -1  14 403.551 37.0257  39
  -6  -1  13 146.104 21.6204  35
  -6  -1  13 176.612 26.3447  39
  -6  -1  12 262.554 30.1760  35
  -6  -1  12 380.406 35.2666  39
  -6  -1  11 236.544 31.3788  35
  -6  -1  11 443.378 37.9046  39
   6   1 -10 181.082 22.0149  38
  -6  -1  10 165.991 25.5084  35
  -6  -1  10 211.202 31.1100  39
   6   1  -9 456.930 35.8553  38
  -6  -1   9 344.935 36.7453  35
  -6  -1   9 366.957 40.1648  39
   6   1  -8 47.1404 15.9161  38
  -6  -1   8 1.79881 19.8269  35
  -6  -1   8 54.6134 26.5140  39
   6   1  -7 75.0196 18.2398  38
  -6  -1   7 63.2719 21.4106  35
   6   1  -7 84.6910 19.8104  30
  -6  -1   7 110.008 26.8168  39
   6   1  -6 107.640 19.2947  38
  -6  -1   6 93.7300 22.6323  35
   6  -1  -6 88.8001 19.8157  30
   6   1  -6 136.940 21.4930  30
  -6  -1   6 109.483 27.7968  39
   6   1  -5 350.292 34.6400  38
  -6  -1   5 321.827 36.4766  35
   6  -1  -5 391.692 36.5190  30
   6   1  -5 486.720 37.7232  30
  -6  -1   5 438.671 42.3327  39
   6   1  -4 561.295 44.3309  38
  -6  -1   4 533.705 46.5223  35
   6  -1  -4 496.745 44.6225  30
   6   1  -4 529.147 45.7150  30
  -6  -1   4 577.770 50.1661  39
  -6  -1   3 93.5945 23.0541  35
   6  -1  -3 77.0043 19.5801  30
   6   1  -3 91.8240 20.7928  30
  -6  -1   3 27.9917 26.3661  39
  -6  -1   2 323.675 35.3968  35
   6  -1  -2 331.377 35.6513  30
   6   1  -2 374.098 35.9358  30
   6  -1  -2 419.963 34.4570  28
  -6  -1   2 431.212 41.7174  39
  -6  -1   1 644.030 55.9334  35
   6  -1  -1 676.970 56.2114  30
   6   1  -1 716.588 56.2990  30
   6  -1  -1 827.394 55.5315  28
  -6  -1   0 789.581 63.9864  35
   6  -1   0 819.027 64.4823  30
   6   1   0 883.517 64.9153  30
   6  -1   0 884.808 63.4560  28
   6  -1   1 692.790 55.0688  30
   6   1   1 721.247 54.7466  30
   6  -1   1 672.575 53.4811  28
   6   1   1 662.062 53.2446  28
   6  -1   2 300.115 32.5949  30
   6  -1   2 384.491 33.2187  28
   6   1   2 325.071 31.9056  28
   6  -1   3 50.2751 18.0012  28
   6   1   3 69.6941 19.3171  28
   6  -1   4 466.288 40.3518  28
  -6   1  -5 382.904 34.0144  32
   6  -1   5 400.997 36.2435  28
  -6   1  -6 102.511 17.1522  32
  -6  -1  -6 60.4919 16.9647  32
   6  -1   6 106.996 19.7873  28
  -6   1  -7 97.8232 17.4324  32
  -6  -1  -7 100.245 18.2881  32
   6  -1   7 104.332 19.1337  28
  -6   1  -8 70.0527 15.9638  32
  -6  -1  -8 19.6870 15.0375  32
  -6   1  -9 351.739 31.8890  32
  -6  -1  -9 338.014 31.1871  32
  -6   1 -10 117.057 18.3052  32
  -6  -1 -10 132.133 18.5807  32
   6  -1  11 219.138 28.4418  33
  -6   1 -11 310.269 27.5659  32
  -6  -1 -11 293.067 26.5541  32
   6  -1  12 231.454 27.7264  33
  -6   1 -12 274.299 25.8104  32
  -6  -1 -12 297.059 25.6161  32
  -6   1 -13 246.876 23.7164  32
  -6   1 -14 425.947 33.0348  32
  -6   1 -15 570.294 41.5912  31
  -6  -2  14-10.8826 16.0019  39
  -6  -2  13 65.9730 19.8656  39
   6   2 -12 17.6230 12.8042  38
  -6  -2  12 57.2752 20.9552  39
   6   2 -11 14.1035 13.1215  38
  -6  -2  11 46.7616 21.8438  39
   6   2 -10 12.2131 14.3379  38
  -6  -2  10 16.4847 17.2574  35
  -6  -2  10 30.8319 22.0802  39
   6   2  -9 16.0948 14.4058  38
  -6  -2   9 51.0623 19.2378  35
  -6  -2   9 52.5965 24.4239  39
   6   2  -8 247.611 27.3257  38
  -6  -2   8 324.602 30.2527  35
   6   2  -8 218.486 28.1024  30
  -6  -2   8 305.589 33.5920  39
   6   2  -7 3.37807 14.8994  38
  -6  -2   7-6.84155 17.8159  35
   6   2  -7 11.8103 16.2909  30
  -6  -2   7-4.24237 23.4479  39
   6   2  -6 525.938 41.4760  38
  -6  -2   6 457.201 42.1916  35
   6   2  -6 488.783 42.4424  30
  -6  -2   6 502.235 47.0075  39
   6   2  -5 1.68904 14.6525  38
  -6  -2   5-45.1831 18.8762  35
   6   2  -5 6.01724 17.1382  30
  -6  -2   5-8.59522 24.1339  39
   6   2  -4 28.4146 16.5997  38
  -6  -2   4 26.1810 19.7040  35
   6  -2  -4 27.7291 17.9302  30
   6   2  -4 71.9399 19.1443  30
  -6  -2   4 88.2123 26.6028  39
   6   2  -3 202.586 23.7615  38
  -6  -2   3 196.873 26.3538  35
   6  -2  -3 168.660 24.7026  30
   6   2  -3 207.715 26.4172  30
  -6  -2   3 219.323 31.7081  39
  -6  -2   2 221.266 28.5291  35
   6  -2  -2 216.829 27.5346  30
   6   2  -2 255.390 28.2344  30
  -6  -2   2 307.368 34.5200  39
  -6  -2   1 835.148 63.3423  35
   6   2  -1 825.245 63.1439  30
  -6  -2   0 67.5192 19.0930  35
   6   2   0 43.3175 17.7348  30
   6  -2   0 59.6840 17.2765  28
  -6  -2  -1 918.851 65.9511  35
   6  -2   1 839.601 64.6405  28
  -6  -2  -2 219.949 26.1910  35
   6  -2   2 213.311 24.8365  28
  -6  -2  -3 232.741 27.4209  35
   6  -2   3 221.505 26.2047  28
  -6  -2  -4 83.8792 18.4167  35
   6  -2   4 34.3161 17.2574  28
   6  -2   5 8.67382 16.2018  28
   6  -2   6 503.463 42.2712  28
  -6  -2  -7 3.14701 13.5867  32
   6  -2   7 6.86890 15.0971  28
  -6   2  -8 226.126 25.5049  36
   6  -2   8 248.380 29.3115  33
  -6  -2  -8 294.680 26.0514  32
   6  -2   8 255.976 27.7817  28
  -6   2  -9 21.7887 13.6822  36
   6  -2   9 32.2596 17.8990  33
  -6   2  -9 28.4124 13.3456  32
   6  -2   9 38.1170 15.7109  28
  -6   2 -10 20.7809 13.7164  36
   6  -2  10 18.6931 16.7319  33
  -6   2 -10 16.9556 12.4977  32
  -6   2 -11 2.28029 12.7319  36
   6  -2  11 20.4124 15.1470  33
  -6   2 -11 26.9819 12.2599  32
  -6   2 -12 36.4871 12.3844  36
   6  -2  12 22.3650 14.8380  33
  -6   2 -12 30.2874 11.8791  32
  -6   2 -13 45.8621 11.8963  36
  -6   2 -13 33.6469 10.9641  32
  -6   2 -14 22.4974 10.3272  36
   6   3 -13 10.3559 9.79753  38
   6  -3 -13-2.03091 11.3789  23
   6   3 -12 12.5662 11.0890  38
   6  -3 -12 47.8619 14.2593  23
   6   3 -11 18.0062 12.3236  38
   6  -3 -11 25.4278 14.8507  23
   6   3 -10 317.910 29.0916  38
   6  -3 -10 342.851 31.8188  23
  -6  -3  10 332.769 32.9606  39
   6   3  -9 431.911 35.6055  38
   6  -3  -9 441.983 38.2912  23
   6   3  -9 418.698 36.7890  30
  -6  -3   9 403.514 39.1101  39
   6   3  -8 202.583 23.1435  38
   6  -3  -8 183.232 25.6163  23
   6   3  -8 252.340 25.9882  30
  -6  -3   8 218.683 28.7440  39
   6   3  -7 7.66614 13.7206  38
  -6  -3   7 15.9198 15.6046  35
   6  -3  -7 1.89728 17.2062  23
   6   3  -7 9.24675 15.5544  30
  -6  -3   7-7.25485 21.4435  39
   6   3  -6 105.721 19.3806  38
  -6  -3   6 133.457 22.2529  35
   6  -3  -6 193.753 25.3168  23
   6   3  -6 142.747 22.6635  30
  -6  -3   6 194.438 28.0004  39
   6   3  -5 1620.16 115.050  38
  -6  -3   5 1569.80 115.079  35
   6  -3  -5 1793.85 118.331  23
   6   3  -5 1706.07 117.324  30
  -6  -3   5 1703.80 118.273  39
  -6  -3   4 455.948 41.3640  35
   6  -3  -4 474.866 44.5405  23
   6   3  -4 579.930 44.5472  30
  -6  -3   3 570.898 48.3593  35
   6   3  -3 652.643 50.1434  30
  -6  -3   2 2246.16 155.022  35
   6   3  -2 2301.86 156.185  30
  -6  -3   1 2273.43 153.918  35
   6   3  -1 2243.29 154.835  30
  -6  -3   0 4581.57 303.687  35
  -6  -3  -1 2289.86 159.847  35
   6  -3   1 2417.21 159.588  28
  -6   3  -2 2242.57 166.080  36
  -6  -3  -2 2609.39 167.462  35
   6  -3   2 2584.70 167.126  28
  -6   3  -3 610.398 51.5160  36
  -6  -3  -3 768.805 53.7547  35
   6  -3   3 673.760 52.6158  28
  -6   3  -4 560.526 47.1061  36
  -6  -3  -4 619.973 47.5794  35
   6  -3   4 624.769 48.0535  28
  -6   3  -5 1617.50 116.712  36
  -6  -3  -5 1759.07 117.283  35
   6  -3   5 1777.54 118.236  33
   6  -3   5 1651.07 117.391  28
  -6   3  -6 126.266 20.0692  36
   6  -3   6 116.570 21.2596  33
   6  -3   6 128.391 21.3958  28
  -6   3  -7 1.34630 13.5931  36
   6  -3   7-6.70733 15.2541  33
   6  -3   7 15.8137 15.0833  28
  -6   3  -8 217.125 22.6873  36
   6  -3   8 201.182 24.4835  33
  -6   3  -9 394.548 33.5466  36
   6  -3   9 424.208 36.1806  33
  -6   3 -10 311.459 26.6122  36
   6  -3  10 276.990 28.8658  33
  -6   3 -11 51.3005 12.4622  36
   6  -3  11 28.6706 14.4321  33
  -6   3 -12 58.0466 12.4080  36
  -6   3 -13-8.13391 9.51087  36
   6   4 -11 35.7922 9.87183  38
   6   4 -10 15.0311 10.0362  38
   6  -4 -10 8.02545 12.1470  23
   6   4  -9 8.32480 10.3917  38
   6  -4  -9-15.6240 13.9997  23
   6   4  -9 1.24791 11.9016  30
   6   4  -8 17.8923 11.0692  38
   6  -4  -8 14.3758 14.1856  23
   6   4  -8 35.0203 14.4722  30
   6   4  -7 162.189 20.3948  30
   6   4  -6 65.7634 16.9928  30
   6   4  -5 179.513 22.2162  30
   6   4  -4 35.5561 16.1170  30
  -6  -4   3 97.8756 16.6127  35
   6   4  -3 79.8838 17.3012  30
  -6  -4   2 92.3461 17.2743  35
   6   4  -2 90.9325 18.0041  30
  -6  -4   1 50.5532 15.0204  35
   6   4  -1 72.4850 16.8621  30
  -6  -4   0 46.8693 15.2715  35
  -6  -4  -1 111.792 18.1002  35
  -6   4  -2 125.682 19.4785  36
  -6  -4  -2 159.256 19.7657  35
  -6   4  -3 112.129 17.9354  36
  -6  -4  -3 113.494 17.6593  35
  -6   4  -4 79.5232 15.8948  36
  -6   4  -5 165.206 19.8218  36
  -6   4  -6 50.6853 14.4722  36
  -6   4  -7 148.271 17.6737  36
  -6   4  -8 16.6899 11.2679  36
  -6   4  -9 8.48583 10.4228  36
  -6  -4  -9-8.43433 9.76168  34
  -6   4 -10 10.7894 10.0979  36
  -6  -4 -10-1.68901 9.40089  34
  -6   4 -11 35.2579 9.63812  36
  -6  -4 -11 22.3187 8.53451  34
   6   5  -7-2.92370 10.1784  30
   6   5  -6 252.555 23.3370  30
   6   5  -5 9.11750 11.2708  30
   6   5  -4 164.254 18.6273  30
   6   5  -3 4.78863 11.2135  30
   6   5  -2 9.49223 11.4344  30
  -6   5   1 55.6849 13.1397  36
  -6   5   0 29.6138 12.1533  36
  -6   5  -1 62.7551 13.7732  36
  -6   5  -2 18.3633 11.9516  36
  -6   5  -3 0.98036 11.1956  36
  -6   5  -4 151.211 16.7194  36
  -6   5  -5 19.8989 10.3240  36
  -6  -5  -5 9.07965 8.79199  34
  -6   5  -6 232.620 19.3817  36
  -6  -5  -6 193.734 18.2952  34
  -6   5  -7 1.41280 8.48040  36
  -6  -5  -7-3.51014 7.69077  34
  -7   0  13-2.74399 12.0940  35
  -7   0  12 20.8071 14.4273  35
  -7   0  11-5.02402 14.7918  35
  -7   0  10 424.605 36.5058  35
  -7   0   9-13.3570 16.3544  35
  -7   0   8 17.1614 17.5112  35
  -7   0   7 1.61309 17.0660  35
   7   0  -7 16.0418 15.1717  30
  -7   0   6 332.475 32.7203  35
   7   0  -6 323.618 32.7832  30
  -7   0   5-6.60295 17.5806  35
   7   0  -5 7.78931 15.7248  30
   7   0  -4 219.048 27.3044  30
   7   0  -4 256.406 26.0716  28
   7   0  -3 8.06038 15.8614  30
   7   0  -3 4.74691 14.6815  28
   7   0  -2 252.773 29.6390  30
   7   0  -2 302.332 28.7955  28
   7   0  -1 6.04526 15.5015  30
   7   0  -1-6.56332 14.4225  28
   7   0   0 13.9873 16.5394  30
   7   0   0-3.31579 14.7804  28
   7   0   1 1.96449 15.2532  30
   7   0   1-8.31884 15.5311  28
  -7   0  -2 233.527 24.9141  32
   7   0   2 268.255 27.0952  28
  -7   0  -3-4.47417 12.5405  32
   7   0   3-1.65614 15.1157  28
  -7   0  -4 216.684 24.2282  32
   7   0   4 247.673 26.6449  28
  -7   0  -5 10.3928 12.7903  32
   7   0   5 12.6802 15.3152  28
  -7   0  -6 369.455 31.9496  32
  -7   0  -7 14.1759 12.4939  32
  -7   0  -8 18.9347 12.4439  32
  -7   0  -9-17.7664 12.3731  32
  -7   0 -10 431.285 34.4170  32
  -7   0 -11-6.18972 10.3380  32
  -7   0 -12 24.6176 9.60872  32
  -7   0 -13-2.83113 7.80836  32
  -7   1  13 67.1138 14.5205  35
  -7  -1  13 115.272 16.7543  39
  -7  -1  12-1.96771 12.9864  35
  -7   1  12 18.5711 13.3787  35
  -7  -1  12 23.6116 16.1534  39
  -7  -1  11-6.96361 14.1173  35
  -7   1  11 3.54825 14.4398  35
  -7  -1  11-2.74324 17.9632  39
  -7  -1  10 84.5985 18.0094  35
  -7   1  10 80.6851 18.2126  35
  -7  -1  10 122.983 22.2861  39
  -7  -1   9 102.041 19.5734  35
  -7   1   9 76.6899 19.0199  35
  -7  -1   8 37.7231 17.5939  35
  -7   1   8 49.7220 18.3554  35
   7   1  -8 47.7314 15.5139  30
  -7  -1   8 30.4902 21.4210  39
  -7  -1   7 80.4928 19.3006  35
   7   1  -7 60.3185 17.3628  30
  -7  -1   7 71.6617 22.9993  39
  -7  -1   6 6.51122 17.9496  35
   7  -1  -6-5.41723 15.4579  30
   7   1  -6 26.0562 15.3842  30
   7   1  -6 30.7099 14.8474  28
  -7  -1   6 39.1047 23.4551  39
  -7  -1   5-21.3866 18.6178  35
   7  -1  -5 11.3529 16.0037  30
   7   1  -5 48.0929 16.3318  30
   7   1  -5 29.0777 15.2347  28
  -7  -1   5 4.01626 22.2721  39
  -7  -1   4 36.5978 17.4710  35
   7  -1  -4 23.4336 17.1443  30
   7   1  -4 21.5703 15.1999  30
   7   1  -4 34.7544 15.4935  28
  -7  -1   3-1.64972 17.2740  35
   7  -1  -3 3.98412 15.9544  30
   7   1  -3-5.93129 15.9021  30
   7   1  -3 25.8186 15.3479  28
  -7  -1   2 54.3575 18.6489  35
   7  -1  -2 84.5630 19.9767  30
   7   1  -2 69.1450 19.0711  30
   7  -1  -2 70.9038 16.8923  28
   7   1  -2 98.0909 18.0784  28
  -7  -1   1-22.6115 17.7343  35
   7  -1  -1 24.2310 17.1743  30
   7   1  -1 23.5042 16.4689  30
   7  -1  -1-6.32957 14.0578  28
   7   1  -1 4.93528 14.8661  28
   7  -1   0 2.01071 15.3961  30
   7   1   0 15.4191 15.9512  30
   7  -1   0-6.45080 15.6562  28
   7   1   0-3.29035 15.0635  28
   7  -1   1 1.98968 16.2767  30
   7  -1   1 8.18584 14.5019  28
   7   1   1 16.3567 15.9342  28
   7  -1   2 56.5644 18.6937  30
   7  -1   2 97.1300 17.7742  28
   7   1   2 82.3221 17.6195  28
   7  -1   3-1.64870 14.7971  28
   7   1   3-1.58094 14.4756  28
  -7  -1  -4 4.63449 13.4522  32
   7  -1   4 19.6184 15.6551  28
  -7  -1  -5 12.1340 13.5648  32
   7  -1   5 24.0355 16.0397  28
  -7  -1  -6 8.83214 12.9418  32
   7  -1   6 47.9633 16.1103  28
  -7   1  -7 14.1985 12.2407  32
  -7  -1  -7 50.6998 14.0819  32
   7  -1   7 30.7399 13.9273  28
  -7   1  -8 26.1020 12.4437  32
  -7  -1  -8 22.5158 12.3457  32
  -7   1  -9 98.3537 15.0671  32
  -7  -1  -9 119.250 15.7146  32
   7  -1  10 91.0492 17.8309  33
  -7   1 -10 124.879 15.2159  32
  -7  -1 -10 111.340 15.2746  32
   7  -1  11 9.49397 12.4376  33
  -7   1 -11 12.4798 9.55229  32
  -7  -1 -11 5.66797 9.63167  32
   7  -1  12 7.87777 11.5013  33
  -7   1 -12 17.2947 8.88407  32
  -7  -1 -12 6.98364 8.74030  32
  -7   1 -13 79.4845 10.7655  32
  -7  -2  12 98.6678 16.8487  39
  -7  -2  11-8.20627 15.7013  39
  -7  -2  10 48.2036 14.3423  35
  -7  -2  10 55.0546 18.5393  39
  -7  -2   9 1.19671 14.1458  35
  -7  -2   9-4.47138 18.1623  39
  -7  -2   8 26.1798 15.4936  35
   7   2  -8 19.8017 14.3617  30
  -7  -2   8 8.07897 19.4374  39
  -7  -2   7-15.4006 16.2215  35
   7   2  -7 4.95450 14.5162  30
  -7  -2   7 15.4753 20.0037  39
  -7  -2   6 1.45287 15.7985  35
   7   2  -6 29.7252 16.1945  30
  -7  -2   5 25.6095 16.5129  35
   7   2  -5-3.62277 15.4748  30
  -7  -2   4 533.004 43.2891  35
   7   2  -4 499.762 43.3094  30
  -7  -2   3 38.7688 16.5460  35
   7   2  -3-1.86713 15.3611  30
  -7  -2   2 86.0402 20.0749  35
   7   2  -2 87.5428 18.3226  30
  -7  -2   1 20.0859 16.1410  35
   7   2  -1 47.8212 17.3260  30
   7  -2  -1 34.5010 14.4273  28
   7   2  -1 43.6688 15.7065  28
  -7  -2   0 9.10744 15.4895  35
   7   2   0-18.0137 15.6091  30
   7  -2   0 10.4181 13.8937  28
   7   2   0 15.4503 15.2174  28
  -7  -2  -1 34.1066 17.1367  35
   7  -2   1 56.2820 16.2155  28
   7   2   1 40.9541 15.5348  28
  -7  -2  -2 122.051 18.6050  35
   7  -2   2 69.2991 17.2189  28
   7  -2   3 37.1586 15.2215  28
   7  -2   4 544.391 43.7278  28
   7  -2   5 20.1381 14.9470  33
  -7  -2  -5 21.0101 13.2013  32
   7  -2   5 9.02847 14.4358  28
   7  -2   6 13.7954 14.3972  33
  -7  -2  -6 25.2760 12.9020  32
   7  -2   6 34.8816 13.9956  28
   7  -2   7-2.98268 14.3118  33
  -7  -2  -7 1.24109 11.6969  32
   7  -2   7 17.9254 14.3291  28
   7  -2   8 16.9790 14.6145  33
  -7  -2  -8 40.7808 11.6992  32
   7  -2   8 1.27128 12.5941  28
   7  -2   9 22.3692 13.7183  33
  -7  -2  -9 14.0408 10.1147  32
   7  -2   9-5.64595 11.5970  28
   7  -2  10 47.3834 13.8703  33
   7  -2  11 13.2960 11.5138  33
   7  -2  12 91.5570 13.0389  33
   7   3  -8 11.2206 12.6745  30
  -7  -3   7 314.132 26.2022  35
   7   3  -7 263.838 27.0994  30
  -7  -3   6 52.9800 14.2311  35
   7   3  -6 35.6469 14.4126  30
  -7  -3   5 48.0151 14.5875  35
   7   3  -5 45.0220 15.6682  30
  -7  -3   4 56.5951 15.5088  35
   7   3  -4 60.7315 16.6143  30
  -7  -3   3 912.588 64.3752  35
   7   3  -3 862.513 65.4219  30
  -7  -3   2 19.7084 14.0962  35
   7   3  -2 11.2991 14.2235  30
  -7  -3   1 475.466 38.7263  35
   7   3  -1 463.758 39.8037  30
   7   3  -1 494.562 38.7230  28
  -7  -3   0 18.4279 14.6313  35
  -7  -3  -1 500.845 40.0669  35
  -7  -3  -2 3.78415 13.6356  35
   7  -3   2 10.4240 12.2479  28
  -7  -3  -3 962.083 67.7539  35
   7  -3   3 936.200 67.9292  28
  -7  -3  -4 34.9289 13.9464  35
  -7  -3  -4 18.9161 11.4657  32
   7  -3   4 62.4476 14.8411  28
  -7  -3  -5 30.9352 11.5417  32
   7  -3   5 55.6859 14.4450  28
   7  -3   6 30.8629 13.4419  33
   7  -3   6 50.8717 13.2591  28
   7  -3   7 262.096 24.8739  33
   7  -3   8 17.7982 12.6484  33
   7  -3   9 19.1601 11.1659  33
   7   4  -7 21.7368 10.4477  30
   7   4  -6 13.6927 11.0891  30
   7   4  -5 37.1469 12.4239  30
  -7  -4   4 39.6242 11.2219  35
   7   4  -4 7.04477 11.3684  30
  -7  -4   3 13.2278 10.4341  35
   7   4  -3 26.3034 11.9036  30
  -7  -4   2 8.30473 10.6372  35
   7   4  -2 35.7168 12.5291  30
  -7  -4   1 31.2015 11.6550  35
  -7   4   0 10.0239 10.1877  36
  -7  -4   0-3.82936 10.6791  35
  -7   4  -1 21.6965 10.9037  36
  -7  -4  -1 40.0310 11.6068  35
  -7   4  -2 28.2969 11.0855  36
  -7   4  -3 23.9407 10.1263  36
  -7   4  -4 40.7970 10.6869  36
  -7   4  -5 34.4364 10.0450  36
  -7   4  -6-5.64144 8.53724  36
  -7   4  -7 40.4352 8.98700  36
  -8   0   9 1.68238 10.7855  35
  -8   0   8 7.51063 12.3632  35
  -8   0   7 2.03286 12.5460  35
   8   0  -7-6.00336 12.0897  30
   8   0  -6 8.03133 12.3467  30
   8   0  -5 4.32877 12.8201  30
   8   0  -4 54.7263 15.3971  30
   8   0  -4 51.3131 14.0834  28
   8   0  -3-7.85452 13.8078  30
   8   0  -3 6.04897 12.2788  28
   8   0  -2 450.226 38.8120  30
   8   0  -2 473.790 37.3739  28
   8   0  -1 22.3688 14.7116  30
   8   0  -1 10.3378 12.9083  28
   8   0   0 466.622 41.9683  30
   8   0   0 585.717 41.9499  28
   8   0   1 13.7517 13.8653  30
   8   0   1 5.22887 12.9599  28
   8   0   2 505.892 39.7452  28
   8   0   3-11.2822 12.2620  28
  -8   0  -4 20.8162 10.9801  32
   8   0   4 54.8368 13.6758  28
  -8   0  -5 9.06292 9.86520  32
   8   0   5-18.8955 11.6103  28
  -8   0  -6 29.6273 10.2845  32
  -8   0  -7-1.78161 9.04193  32
  -8   0  -8 13.7553 8.34675  32
   8   0   9 3.59208 9.70746  33
  -8   0  -9 6.37858 7.87660  32
  -8  -1   9 5.51247 10.9580  35
  -8  -1   8 140.428 16.8515  35
  -8  -1   7 16.9117 12.4494  35
   8   1  -7 14.0334 11.5595  30
  -8  -1   6 196.748 21.2417  35
   8   1  -6 215.506 22.2496  30
   8   1  -6 205.306 20.0007  28
  -8  -1   5 20.9860 13.3004  35
   8   1  -5 4.18264 12.5298  30
   8   1  -5 7.48775 10.9338  28
  -8  -1   4 35.3430 13.9984  35
   8   1  -4 38.0393 14.4218  30
   8   1  -4 32.0474 12.6541  28
  -8  -1   3 14.8538 13.2444  35
   8   1  -3 6.02057 13.2356  30
   8   1  -3-1.19947 11.9516  28
   8   1  -2 24.3482 13.4879  30
   8  -1  -2 22.0643 12.1372  28
   8   1  -2 14.8274 12.9375  28
   8   1  -1 12.1070 13.3022  30
   8  -1  -1-12.0880 12.0381  28
   8   1  -1 3.76113 12.6226  28
  -8  -1   0 41.1683 11.8305  32
   8   1   0 41.4762 14.2579  30
   8  -1   0 60.6536 14.1526  28
   8   1   0 52.8730 14.0766  28
  -8  -1  -1 13.4810 10.7817  32
   8  -1   1 7.49151 12.7758  28
   8   1   1-9.96428 11.9885  28
  -8  -1  -2 1.11979 10.1286  32
   8  -1   2 37.3366 12.8666  28
   8   1   2 14.5022 12.4961  28
  -8  -1  -3-12.1127 10.2139  32
   8  -1   3 12.2114 12.1952  28
   8   1   3 10.3900 11.6551  28
  -8  -1  -4 22.4105 10.4779  32
   8  -1   4 41.0823 12.9139  28
  -8  -1  -5 24.4325 10.6406  32
   8  -1   5 24.3548 11.6094  28
   8  -1   6 187.862 20.4200  33
  -8  -1  -6 193.432 18.7803  32
   8  -1   6 202.586 19.7863  28
   8  -1   7 10.5057 11.4030  33
  -8  -1  -7 28.7306 9.92934  32
   8  -1   8 105.395 14.8372  33
  -8  -1  -8 96.8547 12.7338  32
   8  -1   9 5.01018 9.72696  33
  -8  -1  -9 9.26272 7.65045  32
  -8  -2   8 12.6382 9.05397  35
  -8  -2   7 4.00861 10.4144  35
   8   2  -7 13.9463 10.8278  30
   8   2  -7 9.20186 9.01155  28
  -8  -2   6 218.798 19.9336  35
   8   2  -6 168.877 20.1756  30
   8   2  -6 222.186 19.4332  28
  -8  -2   5 79.4390 14.2943  35
   8   2  -5 100.445 15.4321  30
   8   2  -5 102.572 14.4546  28
  -8  -2   4 536.182 38.7736  35
   8   2  -4 454.506 39.2221  30
   8   2  -4 522.903 38.5431  28
  -8  -2   3 203.544 21.1667  35
   8   2  -3 208.110 22.1434  30
   8   2  -3 216.017 20.8634  28
  -8  -2   2 167.633 19.1601  35
   8   2  -2 195.094 20.6575  30
   8   2  -2 166.438 18.5562  28
  -8  -2   1 16.2615 11.7430  35
   8   2  -1 49.4465 13.2709  30
   8   2  -1 15.3174 11.3674  28
  -8  -2   0-6.94403 10.9460  35
   8  -2   0-4.15898 10.7802  28
   8   2   0-4.31963 10.8483  28
   8  -2   1 40.4296 12.3785  28
   8   2   1 29.4058 11.6156  28
  -8  -2  -2 185.044 18.7652  32
   8  -2   2 189.656 19.7320  28
  -8  -2  -3 210.603 20.3126  32
   8  -2   3 229.185 21.6059  28
  -8  -2  -4 496.078 37.9255  32
   8  -2   4 532.051 39.0584  28
  -8  -2  -5 92.4572 13.0830  32
   8  -2   5 125.972 15.2030  28
  -8  -2  -6 194.252 18.1081  32
   8  -2   6 198.850 19.1500  28
   8  -2   7 15.9166 9.69158  33
  -8  -2  -7-0.69653 7.37110  32
   8   3  -5 81.2588 11.6390  30
   8   3  -5 62.2850 10.2045  28
  -8  -3   4 95.0873 12.2607  35
   8   3  -4 78.8319 12.8512  30
   8   3  -4 87.3914 11.9857  28
  -8  -3   3 6.76408 9.81621  35
   8   3  -3 18.4010 10.0468  30
   8   3  -3 14.2411 9.09371  28
  -8  -3   2 253.283 20.9735  35
   8   3  -2 209.485 21.1099  30
   8   3  -2 245.448 20.8577  28
  -8  -3   1 102.619 13.0868  35
   8   3  -1 83.3249 12.6894  28
  -8  -3   0 177.069 17.3591  35
  -8  -3  -1 100.571 12.5650  35
  -8  -3  -1 81.3489 11.5344  32
  -8  -3  -2 239.936 21.3039  32
   8  -3   2 293.982 22.4551  28
  -8  -3  -3 19.0690 8.17572  32
  -8  -3  -4 77.9249 10.3102  32
   0   0   0    0.00    0.00   0

TITL UrAcDih_223K in P2(1)/c
REM P2(1)/c (#14 in standard setting)
CELL 1.54184   7.355339   6.348499  17.512450  90.0000  90.0053  90.0000
ZERR    4.00   0.000386   0.000347   0.000898   0.0000   0.0050   0.0000
LATT  1
SYMM -x, y+1/2,-z+1/2
SFAC C H N O
UNIT 20.00 40.00 16.00 20.00
TREF
HKLF 4
END
;
_shelx_hkl_checksum                89006
_olex2_submission_special_instructions  'No special instructions were received'
_oxdiff_exptl_absorpt_empirical_details
;
Empirical correction (ABSPACK) includes:
- Absorption correction using spherical harmonics
- Frame scaling
;
_oxdiff_exptl_absorpt_empirical_full_max  1.863
_oxdiff_exptl_absorpt_empirical_full_min  0.720
loop_
  _twin_individual_id
  _twin_individual_mass_fraction_refined
 1 0.563(6)
 2 0.437(6)
