# Supplementary material
Source: MDPI journal article supplement (https://www.mdpi.com/2075-163X/9/6/373)
Supplement: s1 [file s1 › UAD_-90_last.cif]

data_UAD_-90_uracdih_183k
_audit_creation_date               2019-04-30
_audit_creation_method
;
Olex2 1.2
(compiled 2018.05.29 svn.r3508 for OlexSys, GUI svn.r5506)
;
_shelx_SHELXL_version_number       '2018/3'
_audit_contact_author_address      ?
_audit_contact_author_email        ?
_audit_contact_author_name         ''
_audit_contact_author_phone        ?
_publ_contact_author_id_orcid      ?
_publ_section_references
;
Dolomanov, O.V., Bourhis, L.J., Gildea, R.J, Howard, J.A.K. & Puschmann, H.
 (2009), J. Appl. Cryst. 42, 339-341.

Sheldrick, G.M. (2015). Acta Cryst. C71, 3-8.
;
_chemical_name_common              ?
_chemical_name_systematic          ?
_chemical_formula_moiety           'C5 H4 N4 O3, 2(H2 O)'
_chemical_formula_sum              'C5 H8 N4 O5'
_chemical_formula_weight           204.15
_chemical_melting_point            ?

loop_
  _atom_type_symbol
  _atom_type_description
  _atom_type_scat_dispersion_real
  _atom_type_scat_dispersion_imag
  _atom_type_scat_source
 'C' 'C' 0.0181 0.0091 'International Tables Vol C Tables 4.2.6.8 and 6.1.1.4'
 'H' 'H' 0.0000 0.0000 'International Tables Vol C Tables 4.2.6.8 and 6.1.1.4'
 'N' 'N' 0.0311 0.0180 'International Tables Vol C Tables 4.2.6.8 and 6.1.1.4'
 'O' 'O' 0.0492 0.0322 'International Tables Vol C Tables 4.2.6.8 and 6.1.1.4'

_shelx_space_group_comment
;
The symmetry employed for this shelxl refinement is uniquely defined
by the following loop, which should always be used as a source of
symmetry information in preference to the above space-group names.
They are only intended as comments.
;
_space_group_crystal_system        'monoclinic'
_space_group_IT_number             14
_space_group_name_H-M_alt          'P 1 21/c 1'
_space_group_name_Hall             '-P 2ybc'
loop_
  _space_group_symop_operation_xyz
 'x, y, z'
 '-x, y+1/2, -z+1/2'
 '-x, -y, -z'
 'x, -y-1/2, z-1/2'

_cell_length_a                     7.3175(3)
_cell_length_b                     6.3565(3)
_cell_length_c                     17.4962(8)
_cell_angle_alpha                  90
_cell_angle_beta                   90.010(4)
_cell_angle_gamma                  90
_cell_volume                       813.82(6)
_cell_formula_units_Z              4
_cell_measurement_reflns_used      1293
_cell_measurement_temperature      183(2)
_cell_measurement_theta_max        69.8760
_cell_measurement_theta_min        5.0340
_shelx_estimated_absorpt_T_max     ?
_shelx_estimated_absorpt_T_min     ?
_exptl_absorpt_coefficient_mu      1.311
_exptl_absorpt_correction_T_max    1.00000
_exptl_absorpt_correction_T_min    0.50816
_exptl_absorpt_correction_type     multi-scan
_exptl_absorpt_process_details
;
CrysAlisPro 1.171.39.44a (Rigaku Oxford Diffraction, 2018)
Empirical absorption correction using spherical harmonics,
 implemented in SCALE3 ABSPACK scaling algorithm.
;
_exptl_absorpt_special_details     ?
_exptl_crystal_colour              'translucent colorless'
_exptl_crystal_density_diffrn      1.666
_exptl_crystal_density_meas        ?
_exptl_crystal_density_method      ?
_exptl_crystal_description         'prism'
_exptl_crystal_F_000               424
_exptl_crystal_size_max            0.077
_exptl_crystal_size_mid            0.058
_exptl_crystal_size_min            0.022
_exptl_transmission_factor_max     ?
_exptl_transmission_factor_min     ?
_diffrn_reflns_av_R_equivalents    0.0212
_diffrn_reflns_av_unetI/netI       0.0310
_diffrn_reflns_Laue_measured_fraction_full  0.995
_diffrn_reflns_Laue_measured_fraction_max  0.992
_diffrn_reflns_limit_h_max         8
_diffrn_reflns_limit_h_min         -8
_diffrn_reflns_limit_k_max         7
_diffrn_reflns_limit_k_min         -6
_diffrn_reflns_limit_l_max         20
_diffrn_reflns_limit_l_min         -21
_diffrn_reflns_number              4197
_diffrn_reflns_point_group_measured_fraction_full  0.995
_diffrn_reflns_point_group_measured_fraction_max  0.992
_diffrn_reflns_theta_full          67.684
_diffrn_reflns_theta_max           69.947
_diffrn_reflns_theta_min           2.525
_diffrn_ambient_environment        N~2~
_diffrn_ambient_temperature        183(2)
_diffrn_detector                   'CCD plate'
_diffrn_detector_area_resol_mean   ?
_diffrn_detector_type              HyPix3000
_diffrn_measured_fraction_theta_full  0.995
_diffrn_measured_fraction_theta_max  0.992
_diffrn_measurement_details
;
List of Runs (angles in degrees, time in seconds):

  # Type    Start    End  Width  t~exp~   \w     \q     \k     \f   Frames
--------------------------------------------------------------------------
  1  \w    -69.00 -22.00   0.50    3.00    --  -38.82 122.00  29.00   94
  2  \w    -94.00 -60.00   0.50    3.00    --  -38.82 151.00-169.00   68
  3  \w   -100.00 -71.00   0.50    3.00    --  -38.82-151.00 146.00   58
  4  \w     20.00  45.00   0.50    3.00    --   38.82-122.00 -52.00   50
  5  \w     64.00  90.00   0.50    3.00    --   38.82 151.00-169.00   52
  6  \w     37.00  62.00   0.50    3.00    --   38.82-151.00 146.00   50
  7  \w     91.00 124.00   0.50    6.00    --  100.00 151.00-169.00   66
  8  \w     68.00 108.00   0.50    6.00    --  100.00-122.00 -52.00   80
  9  \w    -55.00 -29.00   0.50    3.00    --  -38.82  54.00 -60.00   52
 10  \w    -15.00  11.00   0.50    3.00    --  -38.82 104.00 150.00   52
 11  \w    -73.00 -31.00   0.50    3.00    --  -38.82 104.00 150.00   84
 12  \w     -5.00  26.00   0.50    3.00    --  -38.82  54.00 -60.00   62
 13  \w     78.00 104.00   0.50    3.00    --   38.82  32.00  30.00   52
 14  \w    -24.00   5.00   0.50    3.00    --   38.82 -43.00 -60.00   58
 15  \w     20.00  45.00   0.50    3.00    --   38.82 -32.00  30.00   50
 16  \w     43.00  68.00   0.50    3.00    --   38.82-104.00 -30.00   50
 17  \w     24.00  81.00   0.50    3.00    --   38.82  54.00-120.00  114
 18  \w    -27.00  10.00   0.50    3.00    --   38.82 -32.00  30.00   74
 19  \w    -14.00  32.00   0.50    3.00    --   38.82-104.00 -30.00   92
 20  \w     37.00  74.00   0.50    3.00    --   38.82  32.00  30.00   74
 21  \w     21.00  50.00   0.50    3.00    --   38.82 -43.00 -60.00   58
 22  \w     24.00  51.00   0.50    6.00    --  100.00   0.00-180.00   54
 23  \w     96.00 125.00   0.50    6.00    --  100.00 -69.00-120.00   58
 24  \w    116.00 141.00   0.50    6.00    --  100.00  30.00 -90.00   50
 25  \w     89.00 156.00   0.50    6.00    --  100.00 133.00-180.00  134
 26  \w     34.00  80.00   0.50    6.00    --  100.00 -69.00-120.00   92
 27  \w    109.00 135.00   0.50    6.00    --  100.00 111.00-120.00   52
 28  \w     71.00 132.00   0.50    6.00    --  100.00  15.00-150.00  122
 29  \w     84.00 152.00   0.50    6.00    --  100.00  61.00-120.00  136
 30  \w     93.00 143.00   0.50    6.00    --  100.00  37.00 150.00  100
 31  \w     56.00 103.00   0.50    6.00    --  100.00 -61.00-180.00   94
 32  \w     36.00  90.00   0.50    6.00    --  100.00 -37.00 120.00  108
 33  \w     98.00 123.00   0.50    6.00    --  100.00  45.00-150.00   50
 34  \w     31.00 109.00   0.50    6.00    --  100.00 -86.00 120.00  156
 35  \w     71.00 128.00   0.50    6.00    --  100.00 133.00 -90.00  114
 36  \w     88.00 157.00   0.50    6.00    --  100.00  93.00   0.00  138
 37  \w     81.00 107.00   0.50    6.00    --  100.00 111.00-120.00   52
 38  \w     78.00 103.00   0.50    6.00    --  100.00   0.00-180.00   50
 39  \w     77.00 124.00   0.50    6.00    --  100.00  69.00 -60.00   94
;
_diffrn_measurement_device         'four-circle diffractometer'
_diffrn_measurement_device_type   
 'SuperNova, Single source at offset/far, HyPix3000'
_diffrn_measurement_method         '\w scans'
_diffrn_orient_matrix_type        
 'CrysAlisPro convention (1999,Acta A55,543-557)'
_diffrn_orient_matrix_UB_11        -0.2054106000
_diffrn_orient_matrix_UB_12        0.0520644000
_diffrn_orient_matrix_UB_13        0.0039215000
_diffrn_orient_matrix_UB_21        0.0392704000
_diffrn_orient_matrix_UB_22        0.1716093000
_diffrn_orient_matrix_UB_23        0.0599732000
_diffrn_orient_matrix_UB_31        0.0240238000
_diffrn_orient_matrix_UB_32        0.1630398000
_diffrn_orient_matrix_UB_33        -0.0643587000
_diffrn_radiation_monochromator    mirror
_diffrn_radiation_probe            x-ray
_diffrn_radiation_type             CuK\a
_diffrn_radiation_wavelength       1.54184
_diffrn_source                     'micro-focus sealed X-ray tube'
_diffrn_source_type                'SuperNova (Cu) X-ray Source'
_reflns_Friedel_coverage           0.000
_reflns_Friedel_fraction_full      .
_reflns_Friedel_fraction_max       .
_reflns_number_gt                  1225
_reflns_number_total               1529
_reflns_odcompleteness_completeness  98.31
_reflns_odcompleteness_iscentric   1
_reflns_odcompleteness_theta       70.93
_reflns_special_details
;
 Reflections were merged by SHELXL according to the crystal
 class for the calculation of statistics and refinement.
 
 _reflns_Friedel_fraction is defined as the number of unique
 Friedel pairs measured divided by the number that would be
 possible theoretically, ignoring centric projections and
 systematic absences. Completness statistics refer to single and
 composite reflections containing twin component 1 only.
;
_reflns_threshold_expression       'I > 2\s(I)'
_computing_cell_refinement         'CrysAlisPro 1.171.39.44a (Rigaku OD, 2018)'
_computing_data_collection         'CrysAlisPro 1.171.39.44a (Rigaku OD, 2018)'
_computing_data_reduction          'CrysAlisPro 1.171.39.44a (Rigaku OD, 2018)'
_computing_molecular_graphics      'Olex2 (Dolomanov et al., 2009)'
_computing_publication_material    'Olex2 (Dolomanov et al., 2009)'
_computing_structure_refinement    'ShelXL (Sheldrick, 2015)'
_computing_structure_solution      'ShelXT (Sheldrick, 2015)'
_refine_diff_density_max           0.330
_refine_diff_density_min           -0.168
_refine_diff_density_rms           0.058
_refine_ls_extinction_coef         0.0017(2)
_refine_ls_extinction_expression  
 'Fc^*^=kFc[1+0.001xFc^2^\l^3^/sin(2\q)]^-1/4^'
_refine_ls_extinction_method       'SHELXL-2018/3 (Sheldrick 2018)'
_refine_ls_goodness_of_fit_ref     1.032
_refine_ls_hydrogen_treatment      mixed
_refine_ls_matrix_type             full
_refine_ls_number_parameters       166
_refine_ls_number_reflns           1529
_refine_ls_number_restraints       5
_refine_ls_R_factor_all            0.0584
_refine_ls_R_factor_gt             0.0470
_refine_ls_restrained_S_all        1.031
_refine_ls_shift/su_max            0.000
_refine_ls_shift/su_mean           0.000
_refine_ls_structure_factor_coef   Fsqd
_refine_ls_weighting_details      
 'w=1/[\s^2^(Fo^2^)+(0.0832P)^2^+0.0615P] where P=(Fo^2^+2Fc^2^)/3'
_refine_ls_weighting_scheme        calc
_refine_ls_wR_factor_gt            0.1240
_refine_ls_wR_factor_ref           0.1326
_refine_special_details
;
 Refined as a 2-component twin.
;
_olex2_refinement_description
;
1. Twinned data refinement
 Scales: 0.442(6)
 0.558(6)
2. Fixed Uiso
 At 1.2 times of:
  All N(H) groups
 At 1.5 times of:
  All O(H,H) groups
3. Restrained distances
 OW2-HW2B = OW2-HW2A = OW1-HW1B = OW1-HW1A
 0.95 with sigma of 0.02
 HW1A-O3B
 1.7 with sigma of 0.02
4. Uiso/Uaniso restraints and constraints
Uanis(C1A) = Uanis(C1B)
Uanis(C2A) = Uanis(C2B) = Uanis(C3A) = Uanis(C3B)
Uanis(C4A) = Uanis(C4B)
Uanis(C5A) = Uanis(C5B)
Uanis(N1A) = Uanis(N1B) = Uanis(N3A) = Uanis(N3B)
Uanis(N2A) = Uanis(N2B)
Uanis(N4A) = Uanis(N4B)
Uanis(O1A) = Uanis(O1B)
Uanis(O2A) = Uanis(O2B)
Uanis(O3A) = Uanis(O3B)
5. Others
 Sof(C1B)=Sof(C2B)=Sof(C3B)=Sof(C4B)=Sof(C5B)=Sof(N1B)=Sof(H1B)=Sof(N2B)=
 Sof(H2B)=Sof(N3B)=Sof(H3B)=Sof(N4B)=Sof(H4B)=Sof(O1B)=Sof(O2B)=Sof(O3B)=1-
 FVAR(1)
 Sof(C1A)=Sof(C2A)=Sof(C3A)=Sof(C4A)=Sof(C5A)=Sof(N1A)=Sof(H1A)=Sof(N2A)=
 Sof(H2A)=Sof(N3A)=Sof(H3A)=Sof(N4A)=Sof(H4A)=Sof(O1A)=Sof(O2A)=Sof(O3A)=FVAR(1)
6.a Aromatic/amide H refined with riding coordinates:
 N1A(H1A), N2A(H2A), N3A(H3A), N4A(H4A), N1B(H1B), N2B(H2B), N3B(H3B), N4B(H4B)
;
_atom_sites_solution_hydrogens     mixed
_atom_sites_solution_primary       ?
_atom_sites_solution_secondary     ?
loop_
  _atom_site_label
  _atom_site_type_symbol
  _atom_site_fract_x
  _atom_site_fract_y
  _atom_site_fract_z
  _atom_site_U_iso_or_equiv
  _atom_site_adp_type
  _atom_site_occupancy
  _atom_site_site_symmetry_order
  _atom_site_calc_flag
  _atom_site_refinement_flags_posn
  _atom_site_refinement_flags_adp
  _atom_site_refinement_flags_occupancy
  _atom_site_disorder_assembly
  _atom_site_disorder_group
 C1A C 0.1076(13) 0.2076(15) -0.4273(5) 0.0318(16) Uani 0.585(3) 1 d . . P A 1
 C2A C 0.2648(8) 0.5299(8) -0.4006(7) 0.0295(4) Uani 0.585(3) 1 d . . P A 1
 C3A C 0.2854(7) 0.5698(7) -0.4768(3) 0.0295(4) Uani 0.585(3) 1 d . . P A 1
 C4A C 0.2219(8) 0.4306(8) -0.5332(3) 0.0297(5) Uani 0.585(3) 1 d . . P A 1
 C5A C 0.4059(12) 0.8339(14) -0.4098(6) 0.0318(10) Uani 0.585(3) 1 d . . P A 1
 N1A N 0.1404(11) 0.2509(10) -0.5024(3) 0.0286(10) Uani 0.585(3) 1 d . . P A 1
 H1A H 0.106859 0.156237 -0.534606 0.034 Uiso 0.585(3) 1 calc R . P A 1
 N2A N 0.1760(12) 0.3521(11) -0.3761(4) 0.0366(11) Uani 0.585(3) 1 d . . P A 1
 H2A H 0.162774 0.330641 -0.327927 0.044 Uiso 0.585(3) 1 calc R . P A 1
 N3A N 0.3740(11) 0.7633(11) -0.4815(4) 0.0286(10) Uani 0.585(3) 1 d . . P A 1
 H3A H 0.403379 0.827242 -0.523073 0.034 Uiso 0.585(3) 1 calc R . P A 1
 N4A N 0.3347(10) 0.6845(10) -0.3588(4) 0.0288(9) Uani 0.585(3) 1 d . . P A 1
 H4A H 0.336004 0.691690 -0.309760 0.035 Uiso 0.585(3) 1 calc R . P A 1
 O1A O 0.0276(11) 0.0489(12) -0.4056(6) 0.0431(9) Uani 0.585(3) 1 d . . P A 1
 O2A O 0.2338(6) 0.4488(7) -0.6034(3) 0.0382(6) Uani 0.585(3) 1 d . . P A 1
 O3A O 0.4872(11) 0.9930(15) -0.3920(6) 0.0447(11) Uani 0.585(3) 1 d . . P A 1
 C1B C 0.3852(19) 0.795(2) -0.4282(9) 0.0318(16) Uani 0.415(3) 1 d . . P A 2
 C2B C 0.2374(12) 0.4807(13) -0.4014(10) 0.0295(4) Uani 0.415(3) 1 d . . P A 2
 C3B C 0.2173(10) 0.4291(10) -0.4767(4) 0.0295(4) Uani 0.415(3) 1 d . . P A 2
 C4B C 0.2793(10) 0.5679(11) -0.5336(4) 0.0297(5) Uani 0.415(3) 1 d . . P A 2
 C5B C 0.0913(19) 0.180(2) -0.4079(10) 0.0318(10) Uani 0.415(3) 1 d . . P A 2
 N1B N 0.3646(17) 0.7435(16) -0.5024(6) 0.0286(10) Uani 0.415(3) 1 d . . P A 2
 H1B H 0.410339 0.830581 -0.534780 0.034 Uiso 0.415(3) 1 calc R . P A 2
 N2B N 0.3200(17) 0.6543(18) -0.3768(6) 0.0366(11) Uani 0.415(3) 1 d . . P A 2
 H2B H 0.332043 0.677091 -0.328626 0.044 Uiso 0.415(3) 1 calc R . P A 2
 N3B N 0.1245(16) 0.2393(15) -0.4797(6) 0.0286(10) Uani 0.415(3) 1 d . . P A 2
 H3B H 0.093957 0.172125 -0.520417 0.034 Uiso 0.415(3) 1 calc R . P A 2
 N4B N 0.1620(16) 0.3249(15) -0.3580(6) 0.0288(9) Uani 0.415(3) 1 d . . P A 2
 H4B H 0.159391 0.318901 -0.308929 0.035 Uiso 0.415(3) 1 calc R . P A 2
 O1B O 0.4707(16) 0.964(2) -0.4071(8) 0.0431(9) Uani 0.415(3) 1 d . . P A 2
 O2B O 0.2699(9) 0.5428(10) -0.6037(5) 0.0382(6) Uani 0.415(3) 1 d . . P A 2
 O3B O 0.0093(18) 0.0115(18) -0.3906(8) 0.0447(11) Uani 0.415(3) 1 d D . P A 2
 OW1 O -0.0903(5) -0.2269(5) -0.28002(16) 0.0795(11) Uani 1 1 d D . . . .
 HW1A H -0.083(7) -0.108(5) -0.312(2) 0.119 Uiso 1 1 d DR . . . .
 HW1B H -0.178(6) -0.302(7) -0.308(3) 0.119 Uiso 1 1 d DR . . . .
 OW2 O 0.4029(6) 0.7471(5) -0.21780(16) 0.0819(11) Uani 1 1 d D . . . .
 HW2A H 0.349(7) 0.808(8) -0.174(2) 0.123 Uiso 1 1 d DR . . . .
 HW2B H 0.467(7) 0.637(6) -0.195(3) 0.123 Uiso 1 1 d DR . . . .

loop_
  _atom_site_aniso_label
  _atom_site_aniso_U_11
  _atom_site_aniso_U_22
  _atom_site_aniso_U_33
  _atom_site_aniso_U_23
  _atom_site_aniso_U_13
  _atom_site_aniso_U_12
 C1A 0.038(2) 0.031(3) 0.026(6) 0.002(2) 0.001(3) -0.0011(17)
 C2A 0.0306(10) 0.0258(11) 0.0322(8) 0.000(2) -0.0009(18) -0.0015(7)
 C3A 0.0306(10) 0.0258(11) 0.0322(8) 0.000(2) -0.0009(18) -0.0015(7)
 C4A 0.0307(12) 0.0259(12) 0.0324(11) 0.000(2) 0.001(2) 0.0017(10)
 C5A 0.035(2) 0.038(3) 0.023(5) 0.002(3) 0.000(3) 0.004(2)
 N1A 0.0372(7) 0.0253(8) 0.023(4) -0.0025(16) 0.000(2) -0.0046(6)
 N2A 0.0472(18) 0.044(2) 0.019(3) 0.002(2) 0.000(3) 0.0015(15)
 N3A 0.0372(7) 0.0253(8) 0.023(4) -0.0025(16) 0.000(2) -0.0046(6)
 N4A 0.0384(15) 0.0296(17) 0.018(3) -0.0019(18) -0.002(2) -0.0027(11)
 O1A 0.0494(18) 0.048(3) 0.032(3) 0.002(2) 0.002(3) -0.006(2)
 O2A 0.0498(14) 0.0349(17) 0.0298(8) -0.001(3) -0.002(2) -0.0063(14)
 O3A 0.059(2) 0.042(2) 0.034(4) -0.0032(16) -0.005(3) -0.0075(18)
 C1B 0.038(2) 0.031(3) 0.026(6) 0.002(2) 0.001(3) -0.0011(17)
 C2B 0.0306(10) 0.0258(11) 0.0322(8) 0.000(2) -0.0009(18) -0.0015(7)
 C3B 0.0306(10) 0.0258(11) 0.0322(8) 0.000(2) -0.0009(18) -0.0015(7)
 C4B 0.0307(12) 0.0259(12) 0.0324(11) 0.000(2) 0.001(2) 0.0017(10)
 C5B 0.035(2) 0.038(3) 0.023(5) 0.002(3) 0.000(3) 0.004(2)
 N1B 0.0372(7) 0.0253(8) 0.023(4) -0.0025(16) 0.000(2) -0.0046(6)
 N2B 0.0472(18) 0.044(2) 0.019(3) 0.002(2) 0.000(3) 0.0015(15)
 N3B 0.0372(7) 0.0253(8) 0.023(4) -0.0025(16) 0.000(2) -0.0046(6)
 N4B 0.0384(15) 0.0296(17) 0.018(3) -0.0019(18) -0.002(2) -0.0027(11)
 O1B 0.0494(18) 0.048(3) 0.032(3) 0.002(2) 0.002(3) -0.006(2)
 O2B 0.0498(14) 0.0349(17) 0.0298(8) -0.001(3) -0.002(2) -0.0063(14)
 O3B 0.059(2) 0.042(2) 0.034(4) -0.0032(16) -0.005(3) -0.0075(18)
 OW1 0.092(3) 0.091(2) 0.0564(15) 0.0043(15) 0.0027(19) -0.0065(18)
 OW2 0.100(3) 0.094(2) 0.0510(14) 0.0097(14) -0.0095(19) 0.0123(19)

_geom_special_details
;
 All esds (except the esd in the dihedral angle between two l.s. planes)
 are estimated using the full covariance matrix.  The cell esds are taken
 into account individually in the estimation of esds in distances, angles
 and torsion angles; correlations between esds in cell parameters are only
 used when they are defined by crystal symmetry.  An approximate (isotropic)
 treatment of cell esds is used for estimating esds involving l.s. planes.
;
loop_
  _geom_bond_atom_site_label_1
  _geom_bond_atom_site_label_2
  _geom_bond_distance
  _geom_bond_site_symmetry_2
  _geom_bond_publ_flag
 C1A N1A 1.364(7) . ?
 C1A N2A 1.376(17) . ?
 C1A O1A 1.227(11) . ?
 C2A C3A 1.365(14) . ?
 C2A N2A 1.372(9) . ?
 C2A N4A 1.327(9) . ?
 C3A C4A 1.405(7) . ?
 C3A N3A 1.393(9) . ?
 C4A N1A 1.397(8) . ?
 C4A O2A 1.237(8) . ?
 C5A N3A 1.353(8) . ?
 C5A N4A 1.403(15) . ?
 C5A O3A 1.214(12) . ?
 N1A H1A 0.8600 . ?
 N2A H2A 0.8600 . ?
 N3A H3A 0.8600 . ?
 N4A H4A 0.8600 . ?
 C1B N1B 1.347(12) . ?
 C1B N2B 1.36(2) . ?
 C1B O1B 1.297(16) . ?
 C2B C3B 1.366(19) . ?
 C2B N2B 1.330(13) . ?
 C2B N4B 1.364(14) . ?
 C3B C4B 1.405(10) . ?
 C3B N3B 1.386(12) . ?
 C4B N1B 1.390(12) . ?
 C4B O2B 1.239(11) . ?
 C5B N3B 1.334(12) . ?
 C5B N4B 1.37(3) . ?
 C5B O3B 1.263(16) . ?
 N1B H1B 0.8600 . ?
 N2B H2B 0.8600 . ?
 N3B H3B 0.8600 . ?
 N4B H4B 0.8600 . ?
 OW1 HW1A 0.941(18) . ?
 OW1 HW1B 0.94(2) . ?
 OW2 HW2A 0.95(2) . ?
 OW2 HW2B 0.93(2) . ?

loop_
  _geom_angle_atom_site_label_1
  _geom_angle_atom_site_label_2
  _geom_angle_atom_site_label_3
  _geom_angle
  _geom_angle_site_symmetry_1
  _geom_angle_site_symmetry_3
  _geom_angle_publ_flag
 N1A C1A N2A 115.3(7) . . ?
 O1A C1A N1A 123.2(11) . . ?
 O1A C1A N2A 121.4(8) . . ?
 C3A C2A N2A 120.7(8) . . ?
 N4A C2A C3A 111.0(6) . . ?
 N4A C2A N2A 128.3(10) . . ?
 C2A C3A C4A 122.2(5) . . ?
 C2A C3A N3A 105.9(5) . . ?
 N3A C3A C4A 131.9(6) . . ?
 N1A C4A C3A 112.6(4) . . ?
 O2A C4A C3A 128.0(5) . . ?
 O2A C4A N1A 119.3(6) . . ?
 N3A C5A N4A 107.5(7) . . ?
 O3A C5A N3A 126.8(11) . . ?
 O3A C5A N4A 125.6(9) . . ?
 C1A N1A C4A 127.7(7) . . ?
 C1A N1A H1A 116.1 . . ?
 C4A N1A H1A 116.1 . . ?
 C1A N2A H2A 119.4 . . ?
 C2A N2A C1A 121.2(7) . . ?
 C2A N2A H2A 119.4 . . ?
 C3A N3A H3A 125.7 . . ?
 C5A N3A C3A 108.5(7) . . ?
 C5A N3A H3A 125.7 . . ?
 C2A N4A C5A 107.1(7) . . ?
 C2A N4A H4A 126.5 . . ?
 C5A N4A H4A 126.5 . . ?
 N1B C1B N2B 115.9(10) . . ?
 O1B C1B N1B 122.1(16) . . ?
 O1B C1B N2B 121.8(13) . . ?
 N2B C2B C3B 124.0(12) . . ?
 N2B C2B N4B 127.3(14) . . ?
 N4B C2B C3B 108.6(8) . . ?
 C2B C3B C4B 119.9(7) . . ?
 C2B C3B N3B 107.3(8) . . ?
 N3B C3B C4B 132.7(8) . . ?
 N1B C4B C3B 111.8(7) . . ?
 O2B C4B C3B 127.0(7) . . ?
 O2B C4B N1B 121.1(9) . . ?
 N3B C5B N4B 109.8(11) . . ?
 O3B C5B N3B 123.6(17) . . ?
 O3B C5B N4B 126.6(14) . . ?
 C1B N1B C4B 128.7(11) . . ?
 C1B N1B H1B 115.7 . . ?
 C4B N1B H1B 115.7 . . ?
 C1B N2B H2B 120.2 . . ?
 C2B N2B C1B 119.6(11) . . ?
 C2B N2B H2B 120.2 . . ?
 C3B N3B H3B 126.2 . . ?
 C5B N3B C3B 107.5(10) . . ?
 C5B N3B H3B 126.2 . . ?
 C2B N4B C5B 106.7(10) . . ?
 C2B N4B H4B 126.7 . . ?
 C5B N4B H4B 126.7 . . ?
 HW1A OW1 HW1B 98(4) . . ?
 HW2A OW2 HW2B 100(4) . . ?

loop_
  _geom_hbond_atom_site_label_D
  _geom_hbond_atom_site_label_H
  _geom_hbond_atom_site_label_A
  _geom_hbond_distance_DH
  _geom_hbond_distance_HA
  _geom_hbond_distance_DA
  _geom_hbond_angle_DHA
  _geom_hbond_site_symmetry_A
  _geom_hbond_publ_flag
 N1A H1A O1A 0.86 1.94 2.780(15) 165.5 3_554 yes
 N2A H2A OW1 0.86 2.00 2.848(6) 170.9 2_554 yes
 N3A H3A O3A 0.86 2.04 2.887(17) 168.3 3_674 yes
 N4A H4A OW2 0.86 1.72 2.549(6) 161.7 . yes
 N1B H1B O1B 0.86 1.87 2.72(2) 171.5 3_674 yes
 N2B H2B OW2 0.86 2.06 2.908(9) 170.7 . yes
 N3B H3B O3B 0.86 2.09 2.94(2) 171.7 3_554 yes
 N4B H4B OW1 0.86 1.66 2.493(9) 161.8 2_554 yes
 OW1 HW1A O1A 0.941(18) 2.083(19) 2.941(6) 151(3) . yes
 OW1 HW1A O3B 0.941(18) 1.711(18) 2.563(8) 149(4) . yes
 OW1 HW1B O2A 0.94(2) 1.85(4) 2.693(6) 148(5) 3_554 yes
 OW1 HW1B O2B 0.94(2) 2.27(3) 3.146(8) 154(5) 3_554 yes
 OW2 HW2A O2A 0.95(2) 2.15(3) 3.045(6) 157(5) 4_576 yes
 OW2 HW2A O2B 0.95(2) 1.65(2) 2.591(8) 169(5) 4_576 yes
 OW2 HW2B O3A 0.93(2) 1.80(4) 2.635(5) 147(5) 2_644 yes
 OW2 HW2B O1B 0.93(2) 2.14(4) 2.976(9) 148(5) 2_644 yes

loop_
  _geom_torsion_atom_site_label_1
  _geom_torsion_atom_site_label_2
  _geom_torsion_atom_site_label_3
  _geom_torsion_atom_site_label_4
  _geom_torsion
  _geom_torsion_site_symmetry_1
  _geom_torsion_site_symmetry_2
  _geom_torsion_site_symmetry_3
  _geom_torsion_site_symmetry_4
  _geom_torsion_publ_flag
 C2A C3A C4A N1A -0.9(8) . . . . ?
 C2A C3A C4A O2A -179.4(5) . . . . ?
 C2A C3A N3A C5A 0.6(8) . . . . ?
 C3A C2A N2A C1A 1.0(11) . . . . ?
 C3A C2A N4A C5A -0.3(8) . . . . ?
 C3A C4A N1A C1A 4.6(11) . . . . ?
 C4A C3A N3A C5A 180.0(6) . . . . ?
 N1A C1A N2A C2A 2.2(12) . . . . ?
 N2A C1A N1A C4A -5.3(13) . . . . ?
 N2A C2A C3A C4A -1.7(8) . . . . ?
 N2A C2A C3A N3A 177.8(7) . . . . ?
 N2A C2A N4A C5A -178.1(8) . . . . ?
 N3A C3A C4A N1A 179.8(5) . . . . ?
 N3A C3A C4A O2A 1.3(11) . . . . ?
 N3A C5A N4A C2A 0.6(9) . . . . ?
 N4A C2A C3A C4A -179.6(5) . . . . ?
 N4A C2A C3A N3A -0.2(7) . . . . ?
 N4A C2A N2A C1A 178.6(8) . . . . ?
 N4A C5A N3A C3A -0.7(9) . . . . ?
 O1A C1A N1A C4A 176.6(8) . . . . ?
 O1A C1A N2A C2A -179.7(8) . . . . ?
 O2A C4A N1A C1A -176.7(7) . . . . ?
 O3A C5A N3A C3A 176.7(7) . . . . ?
 O3A C5A N4A C2A -176.9(8) . . . . ?
 C2B C3B C4B N1B 2.9(11) . . . . ?
 C2B C3B C4B O2B -179.7(8) . . . . ?
 C2B C3B N3B C5B -0.3(12) . . . . ?
 C3B C2B N2B C1B 2.1(17) . . . . ?
 C3B C2B N4B C5B -1.5(12) . . . . ?
 C3B C4B N1B C1B -3.2(18) . . . . ?
 C4B C3B N3B C5B -176.7(9) . . . . ?
 N1B C1B N2B C2B -1.8(18) . . . . ?
 N2B C1B N1B C4B 3(2) . . . . ?
 N2B C2B C3B C4B -2.7(14) . . . . ?
 N2B C2B C3B N3B -179.8(11) . . . . ?
 N2B C2B N4B C5B 179.4(12) . . . . ?
 N3B C3B C4B N1B 179.1(7) . . . . ?
 N3B C3B C4B O2B -3.6(15) . . . . ?
 N3B C5B N4B C2B 1.4(14) . . . . ?
 N4B C2B C3B C4B 178.1(7) . . . . ?
 N4B C2B C3B N3B 1.1(11) . . . . ?
 N4B C2B N2B C1B -179.0(12) . . . . ?
 N4B C5B N3B C3B -0.7(14) . . . . ?
 O1B C1B N1B C4B 179.1(11) . . . . ?
 O1B C1B N2B C2B -178.3(12) . . . . ?
 O2B C4B N1B C1B 179.3(12) . . . . ?
 O3B C5B N3B C3B -179.5(10) . . . . ?
 O3B C5B N4B C2B -179.8(11) . . . . ?

_shelx_res_file
;
TITL UrAcDih_183K in P2(1)/c
    uracdih_183k.res
    created by SHELXL-2018/3 at 01:42:57 on 30-Apr-2019
REM P2(1)/c (#14 in standard setting)
CELL 1.54184 7.317539 6.356512 17.496222 90 90.0101 90
ZERR 4 0.000315 0.000284 0.000835 0 0.0041 0
LATT 1
SYMM -X,0.5+Y,0.5-Z
SFAC C H N O
UNIT 20 32 16 20
EQIV $1 -X,-Y,-1-Z
EQIV $2 -X,0.5+Y,-0.5-Z
EQIV $3 1-X,2-Y,-1-Z
EQIV $4 +X,1.5-Y,0.5+Z
EQIV $5 1-X,-0.5+Y,-0.5-Z
DFIX 0.95 OW2 HW2b OW2 HW2a OW1 HW1b OW1 HW1a
DFIX 1.7 HW1a O3B
EADP C1A C1B
EADP C2A C2B C3A C3B
EADP C4A C4B
EADP C5A C5B
EADP N1A N1B N3A N3B
EADP N2A N2B
EADP N4A N4B
EADP O1A O1B
EADP O2A O2B
EADP O3A O3B

L.S. 20
PLAN  20
HTAB N1A O1A_$1
HTAB N2A OW1_$2
HTAB N3A O3A_$3
HTAB N4A OW2
HTAB N1B O1B_$3
HTAB N2B OW2
HTAB N3B O3B_$1
HTAB N4B OW1_$2
HTAB OW1 O1A
HTAB OW1 O3B
HTAB OW1 O2A_$1
HTAB OW1 O2B_$1
HTAB OW2 O2A_$4
HTAB OW2 O2B_$4
HTAB OW2 O3A_$5
HTAB OW2 O1B_$5
BOND $H
Htab
conf
list 4
fmap 2 53
acta
TWIN -1 0 0 0 -1 0 0 0 1 2
OMIT -4 140
OMIT 0 2 5
OMIT -6 1 14
OMIT 1 1 0
OMIT -6 1 13
REM <olex2.extras>
REM <HklSrc "%.\\UrAcDih_183K.hkl">
REM </olex2.extras>

WGHT    0.083200    0.061500
EXTI    0.001671
BASF   0.55787
FVAR       2.87899   0.58524
PART 1
C1A   1    0.107631    0.207644   -0.427282    21.00000    0.03786    0.03150 =
         0.02589    0.00193    0.00119   -0.00109
C2A   1    0.264838    0.529896   -0.400643    21.00000    0.03058    0.02576 =
         0.03221    0.00041   -0.00094   -0.00151
C3A   1    0.285417    0.569789   -0.476797    21.00000    0.03058    0.02576 =
         0.03221    0.00041   -0.00094   -0.00151
C4A   1    0.221916    0.430578   -0.533220    21.00000    0.03068    0.02593 =
         0.03239    0.00026    0.00053    0.00172
C5A   1    0.405909    0.833879   -0.409802    21.00000    0.03504    0.03770 =
         0.02275    0.00156    0.00009    0.00392
N1A   3    0.140380    0.250858   -0.502389    21.00000    0.03718    0.02532 =
         0.02329   -0.00248    0.00039   -0.00456
AFIX  43
H1A   2    0.106859    0.156237   -0.534606    21.00000   -1.20000
AFIX   0
N2A   3    0.175989    0.352147   -0.376139    21.00000    0.04721    0.04385 =
         0.01871    0.00196    0.00012    0.00148
AFIX  43
H2A   2    0.162774    0.330641   -0.327927    21.00000   -1.20000
AFIX   0
N3A   3    0.373961    0.763329   -0.481536    21.00000    0.03718    0.02532 =
         0.02329   -0.00248    0.00039   -0.00456
AFIX  43
H3A   2    0.403379    0.827242   -0.523073    21.00000   -1.20000
AFIX   0
N4A   3    0.334667    0.684462   -0.358840    21.00000    0.03842    0.02960 =
         0.01849   -0.00189   -0.00221   -0.00275
AFIX  43
H4A   2    0.336004    0.691690   -0.309760    21.00000   -1.20000
AFIX   0
O1A   4    0.027571    0.048936   -0.405631    21.00000    0.04936    0.04800 =
         0.03193    0.00159    0.00158   -0.00612
O2A   4    0.233805    0.448808   -0.603427    21.00000    0.04979    0.03492 =
         0.02979   -0.00055   -0.00156   -0.00625
O3A   4    0.487154    0.992952   -0.391967    21.00000    0.05863    0.04159 =
         0.03394   -0.00318   -0.00488   -0.00747
PART 0
PART 2
C1B   1    0.385169    0.795386   -0.428245   -21.00000    0.03786    0.03150 =
         0.02589    0.00193    0.00119   -0.00109
C2B   1    0.237381    0.480726   -0.401382   -21.00000    0.03058    0.02576 =
         0.03221    0.00041   -0.00094   -0.00151
C3B   1    0.217306    0.429134   -0.476720   -21.00000    0.03058    0.02576 =
         0.03221    0.00041   -0.00094   -0.00151
C4B   1    0.279271    0.567912   -0.533576   -21.00000    0.03068    0.02593 =
         0.03239    0.00026    0.00053    0.00172
C5B   1    0.091276    0.179618   -0.407933   -21.00000    0.03504    0.03770 =
         0.02275    0.00156    0.00009    0.00392
N1B   3    0.364588    0.743478   -0.502403   -21.00000    0.03718    0.02532 =
         0.02329   -0.00248    0.00039   -0.00456
AFIX  43
H1B   2    0.410339    0.830581   -0.534780   -21.00000   -1.20000
AFIX   0
N2B   3    0.319992    0.654336   -0.376817   -21.00000    0.04721    0.04385 =
         0.01871    0.00196    0.00012    0.00148
AFIX  43
H2B   2    0.332043    0.677091   -0.328626   -21.00000   -1.20000
AFIX   0
N3B   3    0.124535    0.239283   -0.479706   -21.00000    0.03718    0.02532 =
         0.02329   -0.00248    0.00039   -0.00456
AFIX  43
H3B   2    0.093957    0.172125   -0.520417   -21.00000   -1.20000
AFIX   0
N4B   3    0.162039    0.324920   -0.358021   -21.00000    0.03842    0.02960 =
         0.01849   -0.00189   -0.00221   -0.00275
AFIX  43
H4B   2    0.159391    0.318901   -0.308929   -21.00000   -1.20000
AFIX   0
O1B   4    0.470678    0.964408   -0.407078   -21.00000    0.04936    0.04800 =
         0.03193    0.00159    0.00158   -0.00612
O2B   4    0.269856    0.542803   -0.603709   -21.00000    0.04979    0.03492 =
         0.02979   -0.00055   -0.00156   -0.00625
O3B   4    0.009318    0.011470   -0.390565   -21.00000    0.05863    0.04159 =
         0.03394   -0.00318   -0.00488   -0.00747

PART 0
OW1   4   -0.090312   -0.226883   -0.280020    11.00000    0.09157    0.09067 =
         0.05639    0.00434    0.00274   -0.00653
HW1A  2   -0.083077   -0.107991   -0.311931    11.00000   -1.50000
HW1B  2   -0.177684   -0.302151   -0.308277    11.00000   -1.50000

OW2   4    0.402900    0.747135   -0.217797    11.00000    0.10034    0.09418 =
         0.05104    0.00966   -0.00946    0.01233
HW2A  2    0.349322    0.808435   -0.173677    11.00000   -1.50000
HW2B  2    0.466586    0.636531   -0.194885    11.00000   -1.50000
HKLF 4


REM  UrAcDih_183K in P2(1)/c
REM wR2 = 0.1326, GooF = S = 1.032, Restrained GooF = 1.031 for all data
REM R1 = 0.0470 for 1225 Fo > 4sig(Fo) and 0.0584 for all 1529 data
REM 166 parameters refined using 5 restraints

END

WGHT      0.0838      0.0588

REM Instructions for potential hydrogen bonds
HTAB N1A O1A_$1
HTAB N2A OW1_$2
HTAB N3A O3A_$3
HTAB N4A OW2
HTAB N1B O1B_$3
HTAB N2B OW2
HTAB N3B O3B_$1
HTAB N4B OW1_$2
HTAB OW1 O1A
HTAB OW1 O3B
HTAB OW1 O2A_$1
HTAB OW1 O2B_$1
HTAB OW2 O2A_$4
HTAB OW2 O2B_$4
HTAB OW2 O3A_$5
HTAB OW2 O1B_$5

REM Highest difference peak  0.330,  deepest hole -0.168,  1-sigma level  0.058
Q1    1  -0.1962 -0.1664 -0.2824  11.00000  0.05    0.33
Q2    1   0.2968  0.6605 -0.2181  11.00000  0.05    0.31
Q3    1  -0.0994 -0.2435 -0.2349  11.00000  0.05    0.20
Q4    1   0.2264  0.5052 -0.5031  11.00000  0.05    0.20
Q5    1   0.1085  0.2067 -0.3705  11.00000  0.05    0.19
Q6    1   0.4778  0.9372 -0.4752  11.00000  0.05    0.19
Q7    1   0.3500  0.5815 -0.6025  11.00000  0.05    0.19
Q8    1   0.4497  0.9429 -0.5399  11.00000  0.05    0.18
Q9    1   0.3349  0.6716 -0.6024  11.00000  0.05    0.17
Q10   1   0.4071  0.7620 -0.2455  11.00000  0.05    0.17
Q11   1   0.0888  0.1553 -0.6023  11.00000  0.05    0.17
Q12   1   0.4025  0.6852 -0.1134  11.00000  0.05    0.17
Q13   1   0.1369  0.3201 -0.5991  11.00000  0.05    0.17
Q14   1   0.0218  0.0634 -0.5217  11.00000  0.05    0.16
Q15   1   0.1991  0.4391 -0.6161  11.00000  0.05    0.16
Q16   1  -0.0861 -0.0030 -0.4021  11.00000  0.05    0.16
Q17   1   0.3472  0.8675 -0.2814  11.00000  0.05    0.16
Q18   1   0.3895  0.7326 -0.5748  11.00000  0.05    0.16
Q19   1   0.3547  0.8967 -0.5997  11.00000  0.05    0.15
Q20   1   0.2859  0.7035 -0.2730  11.00000  0.05    0.15
;
_shelx_res_checksum                57867
_shelx_hkl_file
;
   0   0  -1 2.47227 2.75446  12
   0   0  -1 1.76059 2.49757  19
   0   0   1 3.07742 1.91403  17
   0   0  -1 6.45455 2.60975   3
   0   0  -2 46201.4 1425.42  19
   0   0   2 46150.6 1424.41  17
   0   0  -2 46116.7 1424.92  12
   0   0  -2 45908.9 1425.30   3
   0   0  -2 45935.5 1424.02  11
   0   0   2 45868.8 1423.69  18
   0   0  -3 6.62785 7.72773  12
   0   0   3 4.77436 4.26843  18
   0   0  -3 14.5471 4.98715  11
   0   0   3 6.72297 6.11217  17
   0   0  -3 9.48431 7.74962  19
   0   0  -3 12.3574 7.91677   3
   0   0   4 6776.31 211.051  17
   0   0  -4 6426.70 212.204  12
   0   0  -4 6780.10 212.790   3
   0   0  -4 6759.24 210.138  11
   0   0  -4 6531.32 213.561  19
   0   0  -5 8.00992 12.3615   3
   0   0   5 12.5101 10.3102  17
   0   0  -5 31.4296 13.8220  19
   0   0   6 13227.4 415.454  17
   0   0  -6 13152.1 419.382  19
   0   0  -6 13194.0 419.058   4
   0   0  -6 13188.3 418.028   3
   0   0  -7-7.30954 14.4316   3
   0   0  -7-2.77666 13.8297  19
   0   0  -7 6.76162 14.0561   4
   0   0  -8 31490.5 995.275   4
   0   0  -8 32066.9 992.990   3
   0   0  -8 31292.5 995.070  19
   0   0  -9-17.7460 17.1605   4
   0   0  -9 6.00339 16.0091  19
   0   0  -9 6.82931 15.0877   3
   0   0 -10 40258.2 1236.94   3
   0   0 -10 38300.7 1240.77   4
   0   0 -11 2.73367 20.7366   4
   0   0 -11 2.31806 18.4593   3
   0   0 -12 88.2261 26.4560   4
   0   0 -12 114.386 17.5153  36
   0   0 -12 121.347 18.9614  31
   0   0 -13-17.9055 23.7650   4
   0   0 -13 6.73255 16.0850  36
   0   0 -13-13.6972 17.3110  31
   0   0 -14 75.2368 19.5565  26
   0   0 -14 69.5348 24.9488   2
   0   0 -14 90.7545 20.4516  31
   0   0 -14 50.0397 22.0967   9
   0   0 -15 20.4373 19.0475  31
   0   0 -15-7.43275 18.2347  26
   0   0 -16 4838.92 167.082  31
   0   0 -16 4937.13 170.321  26
   0   0 -17 4.68984 17.2344  31
   0   0 -17-3.75378 17.1982  26
   0   0 -18 2.89577 16.0821  31
   0   0 -18 24.5323 18.0186  26
   0   0 -19 13.8916 15.6346  31
   0   0 -19-1.54093 15.4415  26
   0   0 -20-22.5966 13.2931  31
   0   0 -20-2.53911 13.2381  26
   0   0 -21 18.1202 11.1359  26
   0   0 -21 6.87789 10.1650  31
   0   0 -21 5.74761 15.7680   8
   0   1   0-0.71351 10.8668   5
   0   1   0 3.55832 6.84327  18
   0   1   0 2.40507 7.49162  11
   0  -1   0 7.12820 5.67022  13
   0   1  -1 6698.66 209.315  18
   0   1  -1 6554.95 211.990   6
   0   1   1 6863.22 210.838  18
   0   1  -1 6788.45 211.055  11
   0   1  -1 6544.78 212.763   1
   0   1  -1 6728.25 215.317  16
   0  -1  -1 6496.05 207.909  12
   0  -1  -2 24.6642 8.08349  12
   0   1  -2 24.7514 9.63166  21
   0   1  -2 23.1733 6.30428   9
   0   1  -2 21.3903 14.8512  16
   0   1  -2 27.5932 10.0270  11
   0   1  -2 27.1049 12.1199   1
   0  -1   2 34.5372 7.30113  20
   0   1  -2 33.3121 10.4736   2
   0   1  -2 30.3659 6.21138  18
   0   1   2 30.7302 9.66083  18
   0   1  -3 1225.96 47.8286   1
   0   1   3 1282.81 46.0268  18
   0   1  -3 1212.91 45.1475  21
   0   1  -3 1242.71 41.2415  15
   0   1   3 1330.60 46.6114  17
   0   1  -3 1228.91 46.4740   2
   0   1  -3 1302.01 51.0522  16
   0   1  -3 1365.63 46.4655  11
   0  -1  -3 1167.22 44.3156  12
   0   1  -4 25.2989 13.4080   2
   0   1   4 46.5674 13.6988  17
   0   1   4 48.2111 11.6030  18
   0  -1  -4 33.3138 12.2282  12
   0   1  -4 41.2763 12.2102  11
   0   1  -5 2799.51 95.6817   2
   0  -1  -5 2747.16 93.8698  12
   0   1  -5 2688.44 94.0856  11
   0   1   5 2674.78 94.5528  17
   0   1   5 2819.52 93.4498  18
   0  -1  -6 34.5399 14.9857  12
   0   1  -6 12.8631 13.6617   2
   0  -1  -6 25.5823 13.7298  19
   0   1  -6 13.2857 11.6312  11
   0   1   6 17.3436 13.9120  17
   0  -1  -7 9000.38 288.316  19
   0   1  -7 8914.92 288.858   2
   0   1   7 8761.56 287.509  17
   0   1   8 111.012 20.1697  17
   0  -1  -8 126.039 21.3351   3
   0  -1  -8 142.478 20.2911  19
   0   1  -8 113.229 19.9251   2
   0  -1  -9 3.62225 15.9457   3
   0   1  -9 9.45311 15.6043   2
   0   1 -10 83.5306 20.8295   2
   0  -1 -10 104.694 22.6464   3
   0   1 -11 1876.64 81.3224   2
   0  -1 -11 1824.60 82.1377   4
   0  -1 -11 1817.85 80.3247   3
   0   1 -12 26.5543 16.6355  26
   0   1 -12 22.9287 16.3819  31
   0   1 -12 23.1585 20.1045   2
   0  -1 -12 24.8634 22.6087   4
   0  -1 -12 19.1258 22.5650   3
   0  -1 -12 43.6914 17.4415  31
   0  -1 -13 1231.04 53.0091  31
   0   1 -13 1205.84 51.8827  31
   0   1 -13 1358.73 55.3527  26
   0  -1 -13 1122.06 64.3495   3
   0   1 -13 1193.63 64.7676   2
   0  -1 -13 1239.73 69.2129   4
   0  -1 -14 103.751 21.8774  31
   0   1 -14 85.0069 21.1678  26
   0  -1 -14 107.267 32.9363   4
   0   1 -14 113.031 21.6550  31
   0  -1 -15 33.6095 20.2393  31
   0   1 -15 14.9514 18.0732  26
   0   1 -15 25.4843 17.6993  31
   0  -1 -16 8.08995 18.5573  31
   0  -1 -16 3.75482 18.4246  26
   0   1 -16 5.70474 17.7880  26
   0   1 -16 15.1315 17.2774  31
   0   1 -17 33.5484 18.0475  31
   0  -1 -17 87.6626 20.5073  26
   0  -1 -17 75.0289 20.4452  31
   0   1 -17 51.7012 19.5389  26
   0   1 -18 24.0720 23.9899   8
   0  -1 -18-10.0164 16.7025  31
   0  -1 -18 32.1045 17.5646  26
   0   1 -18 13.3102 15.1982  31
   0   1 -18-8.48274 17.0510  26
   0   1 -19 141.378 19.1645  26
   0   1 -19 168.275 27.5950   8
   0   1 -19 120.894 17.0742  31
   0  -1 -19 107.879 18.5494  26
   0  -1 -19 129.400 18.3776  31
   0  -1 -20 6.91424 13.1316  31
   0   1 -20-7.06205 12.4322  26
   0   1 -20-5.43235 11.7331  31
   0  -1 -20 2.41204 13.2641  26
   0   1 -20-22.1440 18.6523   8
   0   1 -21 29.3557 15.4750   8
   0  -1 -21 37.9076 10.8887  31
   0  -1 -21 42.0219 12.0115  26
   0   1 -21 26.8490 10.8482  26
   0   2   0 8402.38 268.866  18
   0   2   0 8376.88 274.559   5
   0   2  -1-2.91911 22.2588   5
   0   2  -1 27.2960 12.6118  18
   0   2   1-18.3893 23.6341   5
   0   2  -1 15.0290 19.1008   1
   0   2  -1 10.8924 20.6067   6
   0   2   1 5.90454 12.2111  18
   0   2  -1 17.0080 14.1363  11
   0   2  -2 9810.97 309.341  18
   0   2   2 9492.81 311.604  18
   0   2  -2 9768.40 312.597  11
   0   2  -2 9971.33 315.214   6
   0   2  -2 9709.68 315.792   1
   0   2  -3 716.409 38.7396  11
   0   2  -3 652.590 42.9374   1
   0   2   3 768.813 38.8906  18
   0   2   4 50556.1 1569.12  18
   0   2  -4 49916.0 1577.39  16
   0   2  -4 50809.1 1572.08   1
   0   2  -4 49990.7 1570.00  11
   0   2  -5 354.571 39.4726  16
   0   2  -5 273.262 29.4367   2
   0   2  -5 360.229 30.9033  11
   0   2  -5 310.928 31.4795   1
   0   2  -6 17075.2 542.363  11
   0   2   6 16955.8 541.222  18
   0   2  -6 16958.4 550.408  16
   0   2  -6 17076.8 542.715   2
   0   2  -7 14.4377 15.2770   2
   0   2  -7 1.73840 14.5339  11
   0   2  -7 15.8053 22.4787  16
   0   2  -8-1.90043 14.6356  11
   0   2  -8 10.1480 16.3857   2
   0   2  -8 11.5058 22.7999  16
   0   2  -9 11.3898 17.7166   2
   0   2  -9 3.20936 21.7205  16
   0   2 -10 1768.02 79.7361   2
   0   2 -10 1852.28 89.3407  16
   0  -2 -11 24.2181 19.8884   3
   0   2  11 9.35446 18.5117  29
   0   2 -11 2.89660 20.8249   2
   0   2 -11 16.2002 27.5862  16
   0   2 -12 3.25379 20.1011   2
   0  -2 -12-2.97276 21.4897   3
   0   2 -13 161.260 31.5673   2
   0  -2 -13 142.306 33.2101   4
   0  -2 -13 92.3412 30.3824   3
   0   2 -14 18042.4 586.774   8
   0   2 -15-2.99655 25.9779   8
   0  -2 -16 1532.96 64.6459  26
   0   2 -16 1414.19 73.8884   8
   0  -2 -17 6.76486 16.6981  26
   0   2 -17 8.28067 24.6664   8
   0   2 -18 26.8970 23.0453   8
   0  -2 -18 34.8343 15.7738  26
   0   2 -19 30.5084 21.2367   8
   0  -2 -19 47.2261 15.3625  26
   0  -2 -20 814.281 35.1639  26
   0   2 -20 775.743 40.4971   8
   0   3   0-1.48124 12.9411  18
   0   3   0 4.94681 19.2349   1
   0   3   0-8.95943 21.7775   6
   0   3   0 4.80630 22.9256   5
   0   3  -1 71.7888 23.9338   6
   0   3  -1 74.7030 15.6931  18
   0   3   1 85.6126 16.3195  18
   0   3  -1 81.4253 21.4615   1
   0   3   1 80.1086 27.1704   5
   0   3   2 36.7004 30.1630   5
   0   3  -2 37.4839 24.5880   1
   0   3   2 49.3102 17.5529  18
   0   3  -2 50.8980 25.7834   6
   0   3   3 8063.91 266.419  18
   0   3   3 8013.92 276.394   5
   0   3  -3 8055.96 272.480   1
   0   3  -4 70.3023 22.2673   1
   0   3   4 83.1696 20.0710  18
   0   3  -5 1268.55 61.5948   1
   0   3   5 1288.75 58.6604  18
   0   3  -6 93.0007 24.0419   1
   0   3   6 108.273 21.7474  18
   0   3   7 6944.22 237.022  18
   0   3  -9 38.7505 25.1792   8
   0   3  -9 61.3845 17.3491  25
   0   3   9 45.0961 19.7868  29
   0  -3 -10 2.92522 14.0875  22
   0   3  10-8.42678 19.5000  29
   0   3 -10 2.45234 23.7693   8
   0   3  11 1268.07 57.9950  29
   0   3 -11 1189.74 64.6564   8
   0  -3 -11 1330.93 55.1407  22
   0   3  12 23.2546 23.2688  29
   0   3 -12 52.8470 26.3856   8
   0  -3 -12 35.2573 15.8601  22
   0  -3 -13 495.415 30.2703  22
   0   3 -13 462.530 43.4747   8
   0   3  13 408.498 34.5898  29
   0   3  14-10.4387 23.7821  29
   0   3 -14 8.77432 25.5530   8
   0   3  15 854.219 47.3575  29
   0   3 -15 818.188 52.9302   8
   0   3 -16 37.5774 24.6221   8
   0   3 -17 200.690 29.0896   8
   0   3 -18 26.1036 19.3570   8
   0   3 -19 6.28050 16.6286   8
   0   4   0 20332.1 663.998   1
   0   4   0 20311.1 661.776   6
   0   4   1 357.013 47.9239   6
   0   4  -1 343.016 42.7854   1
   0   4  -1 301.965 43.2684   6
   0   4   1 274.306 43.7809   1
   0   4   2 1395.17 77.1379   5
   0   4  -2 1278.30 69.7391   1
   0   4   2 1215.86 72.6437   6
   0   4  -2 1253.38 69.7392   6
   0   4  -3 113.032 27.9332   1
   0   4   3 56.1905 35.9776   5
   0   4  -4 1255.68 53.9453  25
   0   4  -4 1276.91 67.1368   1
   0   4   4 1195.12 75.2804   5
   0   4  -4 1219.76 54.7139   7
   0   4   5 192.258 24.0656  29
   0   4  -5 162.187 33.1613   8
   0   4  -5 163.864 22.5710  25
   0   4  -5 171.516 25.0568   7
   0   4  -5 158.497 32.2866   1
   0   4   5 142.011 41.2820   5
   0   4   6 405.557 52.8936   5
   0   4  -6 562.586 41.9902   8
   0   4  -6 520.826 31.4834  25
   0   4  -6 497.675 43.2786   1
   0   4   6 544.052 32.8627  29
   0   4  -7 97.1270 20.0411  25
   0   4  -7 85.2893 30.6404   8
   0   4   7 86.2460 22.0422  29
   0   4   7 83.2010 39.9624   5
   0   4  -8 1059.23 48.8820  25
   0   4  -8 1147.47 58.8734   8
   0  -4  -8 1049.81 46.9497  22
   0   4   8 983.804 49.4376  29
   0  -4  -9 34.4995 17.1150  22
   0   4  -9 67.8017 20.2754  25
   0   4  -9 78.1091 32.0853   8
   0   4   9 66.1167 23.5266  29
   0  -4 -10 5184.06 175.090  22
   0   4  10 5186.57 177.358  29
   0   4 -10 4878.40 185.496   8
   0   4  11 247.971 29.5950  29
   0   4 -11 269.714 37.6030   8
   0  -4 -11 201.560 25.4911  22
   0  -4 -12 582.016 35.8150  22
   0   4 -12 733.733 48.2105   8
   0   4  12 686.288 41.7419  29
   0   4  13 182.109 27.6757  29
   0  -4 -13 122.423 21.1580  22
   0   4 -13 118.017 29.9064   8
   0  -4 -14 42.9363 15.6859  22
   0   4 -14 24.0698 24.1827   8
   0   4  14 21.2215 22.2472  29
   0   4  15 9.01741 20.4553  29
   0  -4 -15 14.2046 14.1981  22
   0   4 -15 19.6069 22.4617   8
   0   4 -16 208.533 27.0356   8
   0   4  16 217.167 24.8931  29
   0   4  16 165.137 23.2152  24
   0   4  17 109.176 20.4635  24
   0   4 -17 94.4714 21.5515   8
   0   4  17 66.1596 18.7068  29
   0   4 -18 565.649 33.1722   8
   0   4  18 643.209 32.6295  24
   0   5   0 14.3420 23.9977   7
   0   5   0 55.6403 28.2406   6
   0   5   0 52.3176 21.6556  25
   0   5   0 42.4808 25.0899   1
   0   5  -1 2363.32 108.572   1
   0   5  -1 2070.47 84.8026  25
   0   5   1 2442.82 111.864   1
   0   5  -1 2132.69 87.6388   7
   0   5   1 2136.41 105.095   6
   0   5   1 2120.91 87.5716   7
   0   5   1 2116.89 85.8351  25
   0   5   2 6.03622 19.5640  25
   0   5  -2-3.87460 22.4161   7
   0   5   2 36.9596 32.0574   6
   0   5   2-25.5985 34.2007   1
   0   5  -2 22.1201 25.5945   1
   0   5  -2 13.1242 18.4553  25
   0   5   2 8.77839 25.9438   7
   0   5  -3 942.356 49.5790   7
   0   5   3 949.289 70.6044   6
   0   5  -3 1066.00 49.2096  25
   0   5  -3 849.315 61.3983   1
   0   5   3 907.200 69.3587   1
   0   5  -4 11.2149 19.9490   7
   0   5  -4-3.69554 18.2422  25
   0   5   4-10.0042 35.1290   6
   0   5   4-10.7716 37.5978   5
   0   5  -5 1.85174 18.2815  25
   0   5  -6 3.70061 17.1900  25
   0   5   6-5.39156 19.7652  29
   0   5   7 677.635 40.1159  29
   0   5  -7 685.614 38.4190  25
   0   5   8 118.228 23.9282  29
   0   5  -8 127.968 21.3668  25
   0  -5  -8 119.962 19.4257  22
   0   5   9 168.025 24.8022  29
   0   5  -9 156.576 22.1158  25
   0  -5  -9 144.268 20.6814  22
   0  -5 -10 94.1034 19.7756  22
   0   5  10 65.5831 22.8882  29
   0  -5 -11 68.9929 16.7381  22
   0   5  11 67.6279 21.2073  29
   0   5  12 97.7093 22.7327  29
   0  -5 -12 63.9689 17.2374  22
   0   5  13-8.08586 18.5080  29
   0  -5 -13 5.72507 14.1770  22
   0   5  13 39.1948 17.8121  24
   0   5  14 20.3870 17.4299  29
   0  -5 -14-6.30043 12.1368  22
   0   5  14-3.12014 15.9488  24
   0   5  15 180.956 20.7547  24
   0   5  15 224.189 21.1436  29
   0   5  16 1.01081 13.3723  29
   0   5  16 12.4728 13.2925  24
   0   6   0 111.608 24.4212   7
   0   6   0 78.7731 19.4016  25
   0   6  -1 65.6866 22.3721   7
   0   6   1 62.4896 24.6117   7
   0   6   1 42.5507 20.1835  25
   0   6  -1 64.8383 20.0631  25
   0   6  -2 1123.36 55.6040   7
   0   6  -2 1128.73 52.7606  25
   0   6   2 1104.73 56.0698   7
   0   6  -3 374.540 30.8992  25
   0   6  -3 342.377 35.5828   7
   0   6  -4 7588.93 253.686  25
   0   6   4 7667.34 258.593   7
   0   6  -5 39.3643 17.8069  25
   0   6   5 31.2001 25.0066   7
   0   6  -6 1556.05 65.3951  25
   0   6   6 1572.23 70.4665   7
   0   6   7 102.107 25.1801   7
   0   6  -7 75.8922 19.4358  25
   0   6   8 44.6508 22.5790   7
   0   6   9-1.45873 16.6566  29
   0   6   9 28.4957 21.1467   7
   0   6  10-6.81394 15.8720  29
   0  -6 -10 11.8646 11.7146  22
   0   6  11 30.9896 14.7526  29
   0   6  11-6.20699 16.6952   7
   0   6  12 16.0895 15.9587   7
   0   6  12 18.6283 13.8839  29
   0   6  13 11.1225 11.9689  29
   0   6  13-14.4156 13.6482   7
   0   7   0 10.3915 16.7982   7
   0   7  -1 126.352 16.6045  25
   0   7   1 116.872 19.1725   7
   0   7  -2 22.1846 12.9363  25
   0   7   2 14.9761 16.7589   7
   0   7  -3 113.950 15.6895  25
   0   7   3 123.959 19.9846   7
   0   7  -4-3.72520 12.6955  25
   0   7   4-8.59429 15.9062   7
   0   7   5 82.0772 17.7254   7
   0   7  -5 83.1782 13.9548  25
   0   7   6 10.2525 15.9286   7
   0   7   7 37.5701 14.0720   7
   0   7   8 32.4240 13.9868   7
   0   7   9 9.87735 11.5789   7
   1   0 -21-2.57952 9.93070  26
   1   0 -21-14.4259 14.9078   8
   1   0 -21-13.0170 10.0244  31
   1   0 -20 119.235 15.6203  31
   1   0 -20 122.421 16.0240  26
   1   0 -20 95.9303 20.7392   8
   1   0 -19 1.45436 15.2434  26
   1   0 -19 23.4938 15.7732  31
   1   0 -18 964.745 46.1206  26
   1   0 -18 941.256 44.3076  31
   1   0 -17 9.06954 17.7489  26
   1   0 -17 14.0743 18.2551  31
   1   0 -16 2424.40 93.5200  26
   1   0 -16 2441.43 91.8477  31
   1   0 -15 9.55623 18.2291  31
   1   0 -15 16.0314 18.3895  36
   1   0 -14 46.9032 19.1206  31
   1   0 -14 62.5667 18.0003  36
   1   0 -14 12.3937 24.4987   9
   1   0 -14 89.2364 25.4151   2
   1   0 -13 13.9823 20.2195   9
   1   0 -13 27.2354 17.9212  34
   1   0 -13 4.24411 16.2296  36
   1   0 -13 15.3666 17.6266  31
   1   0 -13 15.4269 19.9255   2
   1   0 -13 3.54316 22.7189   4
   1   0 -12 124.422 20.2134  34
   1   0 -12 93.7713 26.5657   4
   1   0 -12 130.861 24.0990   9
   1   0 -12 96.4066 17.3694  36
   1   0 -11-2.31234 16.7158   3
   1   0 -11 10.8327 18.3369   9
   1   0 -11-16.3073 21.2386   4
   1   0 -10 37.3837 20.6355   4
   1   0 -10 73.5666 18.7941   3
   1   0 -10 46.6968 18.2916   9
   1   0  -9-5.90340 17.1264   4
   1   0  -9 3.21972 14.2803   9
   1   0  -9 13.5436 13.9120   3
   1   0  -8 4680.79 160.395   4
  -1   0   8 4550.34 157.005  17
   1   0  -8 4693.10 157.788   3
   1   0  -8 4631.31 157.164   9
   1   0  -7-1.21001 11.6545   3
   1   0  -7-2.74111 14.3996   4
   1   0  -7-3.49463 13.0576   9
  -1   0   7 3.52002 12.3604  17
   1   0  -6 13795.7 426.948   9
   1   0  -6 13227.9 427.359   3
  -1   0   6 12951.8 426.509  17
   1   0  -6 14009.4 428.160   4
   1   0  -5 3.25226 10.5917   3
   1   0  -5 4.17998 12.6509   9
  -1   0   5 5.99310 12.4304  17
   1   0  -5 3.56096 9.95889  10
   1   0  -5-3.57703 12.6725   4
   1   0  -4 8826.73 280.304   9
   1   0  -4 8949.55 279.747  10
   1   0  -4 8806.42 279.311   3
  -1   0   4 8727.21 280.169  17
  -1   0   3 15.6913 10.9967  17
   1   0  -3 21.4063 8.18167   3
   1   0  -3 23.5598 11.9590   9
   1   0  -3 11.0469 10.1819  10
   1   0  -2 15880.5 495.419  13
   1   0  -2 15940.9 493.505   3
   1   0  -2 16145.1 495.712   9
  -1   0   2 15892.5 493.653  21
   1   0  -2 15603.4 493.274  16
   1   0  -1 3.81423 3.29781   3
   1   0  -1 1.59047 8.38493  20
   1   0  -1 0.51782 3.78804   4
  -1   0   0 6.75171 6.20731  14
   1   0   0 4.70115 8.13625  20
  -1   0  -1 1.92410 3.56272   4
  -1   0  -1 3.87969 2.94645   3
  -1   0  -1 9.90703 7.29629  14
  -1   0  -2 16411.8 512.237   3
  -1   0  -2 16591.5 514.792  19
  -1   0  -3 12.3221 8.42717   3
  -1   0  -3 19.8917 11.7476  19
  -1   0  -4 9312.25 294.291   3
  -1   0  -4 9302.17 297.106  19
  -1   0  -5 1.12283 14.0862  19
  -1   0  -5 16.9680 13.5601  12
  -1   0  -5 2.42791 11.3180   3
  -1   0  -5 5.42982 12.3867   4
  -1   0  -6 14464.8 461.185   3
  -1   0  -6 14721.2 462.663   4
  -1   0  -6 14743.2 461.333  12
  -1   0  -6 14374.2 465.059  19
  -1   0  -7 6.59357 15.6237  19
  -1   0  -7-3.66528 12.9045   3
  -1   0  -7-6.97968 13.7804  12
  -1   0  -7 13.9756 14.6834   4
  -1   0  -8 4814.67 161.561  12
  -1   0  -8 4893.79 167.915  19
  -1   0  -8 4532.70 162.644   3
  -1   0  -8 4889.30 165.305   4
  -1   0  -9 1.71827 15.5241   3
  -1   0  -9 12.0870 16.7691   4
  -1   0  -9 6.35933 15.8380  12
  -1   0  -9 4.63103 16.5504  19
  -1   0 -10 32.4707 21.2383  19
  -1   0 -10 86.1928 22.7060   4
  -1   0 -10 74.7692 19.0687   3
  -1   0 -11-6.30291 21.4656  19
  -1   0 -11 27.8610 22.5954   4
  -1   0 -12 91.3525 18.1547  26
  -1   0 -12 119.174 18.9267  31
  -1   0 -12 129.964 30.7328  19
  -1   0 -12 99.3083 26.4165   4
  -1   0 -13 6.94147 16.6171  31
  -1   0 -13-18.9217 21.6138   2
  -1   0 -13 6.51742 17.1188  26
  -1   0 -13-3.62841 23.9171   4
  -1   0 -14 45.5506 24.6896   2
  -1   0 -14 67.2046 19.1520  31
  -1   0 -14 76.1875 19.7304  26
  -1   0 -15 9.39424 17.8020  31
  -1   0 -15 24.3853 19.5035  26
  -1   0 -16 2491.51 96.2162  26
  -1   0 -16 2492.76 92.9502  31
  -1   0 -17 4.60277 17.8711  31
  -1   0 -17 16.8782 18.1230  26
  -1   0 -18 901.477 43.5086  31
  -1   0 -18 968.760 46.1681  26
  -1   0 -19-9.78446 14.7004  31
  -1   0 -19-3.04327 15.4255  26
  -1   0 -20 108.398 16.4045  26
  -1   0 -20 103.180 15.3722  31
  -1   0 -20 141.655 23.1703   8
  -1   0 -21-9.14534 14.6161   8
  -1   0 -21 26.7395 10.5348  26
   1  -1 -21-0.83410 9.75597  26
   1  -1 -20 195.125 17.4935  31
   1  -1 -20 202.073 18.9015  26
   1   1 -20 209.073 24.6843   8
   1   1 -20 187.776 16.7340  31
   1   1 -19 81.4905 15.6875  31
   1  -1 -19 105.635 17.9668  31
   1  -1 -19 125.294 18.5856  26
   1   1 -19 99.7325 24.3903   8
   1   1 -18 187.098 20.8169  31
   1  -1 -18 280.729 24.4950  31
   1  -1 -18 183.151 22.9726  26
   1   1 -18 246.219 30.8695   8
   1   1 -17 470.215 32.2700  26
   1  -1 -17 481.015 31.7696  31
   1  -1 -17 485.717 32.9430  26
   1   1 -17 545.211 31.5861  31
   1   1 -16 768.211 39.7613  31
   1  -1 -16 809.074 42.3072  31
   1   1 -16 738.363 41.3606  26
   1  -1 -16 753.418 39.2959  36
   1  -1 -15 46.4376 18.1791  36
   1   1 -15 86.7603 19.5550  31
   1   1 -15 124.928 22.0545  34
   1  -1 -15 127.999 22.7368  31
   1   1 -15 105.903 21.4137  26
   1  -1 -14 135.036 21.9912  31
   1   1 -14 96.3421 19.9793  31
   1   1 -14 149.411 22.5125  34
   1  -1 -14 106.394 31.5789   4
   1  -1 -14 93.7502 19.5740  36
   1  -1 -13 500.990 31.9671  31
   1   1 -13 457.588 30.7289  34
   1  -1 -13 390.840 37.9025   3
   1  -1 -13 422.929 42.6747   4
   1   1 -13 576.910 31.2901  31
   1   1 -13 445.285 39.5930   2
   1  -1 -13 501.249 29.9028  36
   1  -1 -13 502.608 40.5310   9
   1  -1 -12 902.183 57.6233   4
   1   1 -12 1044.84 47.0265  34
   1   1 -12 1040.39 46.1661  36
   1  -1 -12 1011.59 54.5277   9
   1   1 -12 950.688 56.2167   2
   1  -1 -12 1149.56 45.8406  36
   1  -1 -12 981.758 54.7963   3
   1  -1 -11-2.68142 19.6006   4
  -1   1  11 12.9255 20.1038  17
   1   1 -11 7.22306 14.3506  36
   1  -1 -11 9.69851 18.2985   3
   1   1 -11 10.0641 18.6923   2
   1  -1 -11-13.7193 18.9522   9
   1   1 -10 1662.44 67.7855   9
   1  -1 -10 1590.73 69.8013   3
  -1   1  10 1671.00 70.9467  17
   1   1 -10 1502.52 69.3238   2
   1   1  -9 1535.53 63.5569   9
  -1   1   9 1547.45 65.7664  17
   1   1  -9 1519.32 65.9372   2
   1  -1  -9 1577.76 66.2871   3
  -1   1   8 2603.70 93.4684  17
   1   1  -8 2439.12 92.9513   2
   1   1  -8 2417.55 90.5501   9
   1  -1  -8 2517.95 93.5481   3
   1   1  -7 305.374 22.1529   9
   1   1  -7 286.832 21.5769   2
  -1   1   7 301.829 24.0666  17
   1   1  -7 287.105 22.2556  11
   1   1  -6 12259.4 395.961   9
  -1   1   6 12446.4 397.836  17
   1   1  -6 12708.6 402.289  16
   1   1  -6 12499.5 398.022  11
   1   1  -6 12616.0 397.928   2
   1   1  -5 1535.61 56.2005  11
   1   1  -5 1402.20 53.8498   9
  -1   1   5 1451.43 54.8858  17
   1   1  -5 1442.32 54.8081   2
   1   1  -5 1307.74 59.2775  16
  -1   1   4 21449.2 668.201  17
   1   1  -4 21700.7 673.053  16
   1   1  -4 21239.9 668.518   2
   1   1  -4 20797.0 667.386   9
   1   1  -4 21784.1 669.285  11
   1   1  -3 1564.20 58.3271   1
  -1   1   3 1633.42 57.2409  17
   1  -1  -3 1554.32 59.8006  13
   1  -1  -3 1603.77 56.2876   9
   1   1  -3 1563.53 57.8865   2
   1  -1  -2 8501.46 273.629  13
   1   1  -2 8466.88 271.979   2
  -1   1   2 8613.68 270.239  17
   1   1  -2 8695.28 272.243   1
   1  -1  -2 8511.41 269.655   9
   1   1  -1 335.303 16.6075  15
  -1   1   1 294.603 20.7312  21
   1   1  -1 268.621 18.0095   1
   1   1  -1 277.579 17.9698   6
   1  -1  -1 307.551 15.9075   9
   1  -1  -1 309.264 19.9953  13
  -1   1   1 316.099 15.3264  17
  -1   1   0 66.8246 16.2622  21
   1   1   0 27.3098 10.3575  15
  -1   1   0 49.6139 15.6092  16
   1  -1   0 82.0686 16.3078  20
  -1   1   0 46.7825 8.06843  17
   1   1   0 22.2021 13.0966   5
  -1   1   0 54.5280 14.3481   5
  -1   1  -1 280.836 13.0561  17
  -1   1  -1 328.392 22.0999  21
  -1   1  -1 366.366 19.8194   6
   1  -1   1 338.926 21.3270  20
  -1   1  -1 331.374 19.6904   1
  -1   1  -1 359.867 21.2474  16
   1   1   1 353.451 17.3094  15
   1   1   2 8665.12 274.526  15
  -1   1  -2 8544.43 274.426   2
  -1   1  -2 8753.88 275.795   1
   1  -1   2 8687.17 276.516  20
  -1   1  -3 1502.94 57.1810   2
  -1   1  -3 1661.59 59.1651   1
  -1   1  -3 1617.48 54.1459  12
   1   1   3 1532.74 56.9048  15
  -1   1  -4 20835.6 655.422  12
  -1   1  -4 20808.8 662.661  19
  -1   1  -4 21216.0 658.208   2
   1   1   4 21245.0 658.167  15
  -1   1  -5 1563.62 61.2945  14
  -1   1  -5 1642.84 57.8471  12
  -1  -1  -5 1727.39 61.6757  12
  -1   1  -5 1587.69 65.4162  19
   1   1   5 1637.55 59.4532  15
  -1   1  -5 1558.54 60.0467   2
  -1   1  -6 12029.6 388.507   2
  -1   1  -6 12000.8 393.431  19
  -1   1  -6 11987.5 388.631  14
  -1  -1  -6 12656.6 388.714  12
  -1   1  -7 338.986 24.6135   2
  -1   1  -7 331.098 29.3992  19
  -1  -1  -7 375.124 27.0576  19
  -1  -1  -7 339.363 25.7570  12
  -1   1  -8 2452.31 92.0098   2
  -1   1  -8 2287.25 97.9018  19
  -1  -1  -8 2563.83 95.0882  19
  -1  -1  -8 2527.59 93.1073   3
  -1  -1  -8 2457.17 91.6140  12
  -1   1  -9 1705.94 68.4629   2
  -1  -1  -9 1483.56 68.5077  19
  -1  -1  -9 1711.68 67.7793  12
  -1  -1  -9 1517.98 67.5438   3
  -1  -1 -10 1662.98 73.8885   3
  -1  -1 -10 1717.25 77.4607  19
  -1  -1 -10 1923.19 74.6896  12
  -1   1 -10 1664.01 73.4435   2
  -1  -1 -11 21.8294 19.9466   4
  -1   1 -11-17.9896 19.0936   2
  -1   1 -11 12.4674 14.8241  26
  -1  -1 -11-2.44736 17.8905   3
  -1  -1 -11 20.9653 21.5297  19
  -1   1 -12 1006.96 44.7455  31
  -1  -1 -12 983.665 58.9397   4
  -1  -1 -12 1039.11 46.0390  31
  -1  -1 -12 963.043 55.1464   3
  -1   1 -12 1113.70 47.6778  26
  -1   1 -12 943.605 55.1874   2
  -1   1 -13 544.217 32.0629  31
  -1  -1 -13 598.835 34.1398  31
  -1  -1 -13 553.636 33.6309  26
  -1  -1 -13 572.893 46.1983   4
  -1   1 -13 547.595 34.6437  26
  -1  -1 -13 528.501 42.5190   3
  -1   1 -13 492.222 41.3834   2
  -1  -1 -14 114.549 20.7931  26
  -1  -1 -14 187.925 34.0011   4
  -1   1 -14 148.390 22.6906  26
  -1   1 -14 158.800 21.3934  31
  -1  -1 -14 145.372 22.1463  31
  -1  -1 -15 82.8280 21.0143  31
  -1  -1 -15 89.1937 20.5293  26
  -1   1 -15 83.2979 19.3071  31
  -1   1 -15 40.4018 19.3540  26
  -1   1 -16 640.806 36.8415  31
  -1   1 -16 671.237 40.5194  26
  -1  -1 -16 733.702 39.1041  31
  -1  -1 -16 724.641 40.1841  26
  -1  -1 -17 530.356 32.4702  31
  -1   1 -17 493.199 30.0931  31
  -1  -1 -17 481.932 31.8084  26
  -1   1 -17 447.743 32.3530  26
  -1  -1 -18 180.951 21.8919  26
  -1  -1 -18 214.805 22.1038  31
  -1   1 -18 210.346 22.9508  26
  -1   1 -18 170.324 30.1446   8
  -1   1 -18 153.760 19.7631  31
  -1   1 -19 93.7802 16.2374  31
  -1  -1 -19 100.688 17.2831  31
  -1   1 -19 96.4967 23.4070   8
  -1  -1 -19 103.785 17.6052  26
  -1   1 -19 77.1044 17.8053  26
  -1   1 -20 161.200 17.4024  26
  -1  -1 -20 138.898 16.4524  26
  -1   1 -20 153.262 22.2519   8
  -1   1 -21-12.6804 10.1467  26
   1   2 -20 61.4827 17.9710   8
   1  -2 -20 62.0331 12.8561  26
   1  -2 -19 129.493 17.5991  26
   1   2 -19 113.580 22.9324   8
   1   2 -18 98.8862 25.9678   8
   1  -2 -18 46.6836 16.3887  26
   1   2 -17 44.4947 24.6830   8
   1   2 -16 101.354 28.6290   8
  -1   2  15 142.230 27.4362  29
   1   2 -15 115.364 30.0843   8
   1   2 -14 48.1595 28.4956   8
  -1   2  14 34.1888 23.4754  29
  -1   2  13 1246.14 60.0675  29
   1   2 -13 1352.64 68.0501   8
   1   2 -12 77.0733 24.7543   2
   1  -2 -12 101.422 25.6940   9
   1  -2 -12 83.5649 24.9871   3
   1  -2 -11 129.137 25.1810   3
   1   2 -11 112.783 22.9116   2
   1  -2 -11 68.0320 20.6230   9
   1  -2 -10 48.9255 18.6716   9
   1  -2 -10 9.61208 18.7031   3
   1   2 -10 15.4979 18.3704   2
   1   2  -9 3193.21 121.064   2
   1   2  -8 3028.15 108.140   2
   1   2  -8 2753.82 106.354  11
  -1   2   8 2781.91 107.607  17
   1   2  -8 2769.94 115.370  16
   1   2  -7 996.356 47.4458   2
   1   2  -7 923.206 47.0925  11
  -1   2   7 1011.32 47.8001  17
   1   2  -7 927.607 53.9334  16
   1   2  -6 3189.48 113.632   2
  -1   2   6 3190.56 114.300  18
  -1   2   6 3154.41 113.427  17
   1   2  -6 3086.18 114.323  11
   1   2  -5 1807.17 70.6740  11
  -1   2   5 1807.04 71.0368  18
   1   2  -5 1799.37 72.6315   1
  -1   2   5 1740.22 69.5397  17
  -1   2   4 4311.88 141.698  18
   1   2  -4 4066.27 140.389  11
   1   2  -4 3896.08 141.499   1
  -1   2   4 4072.48 138.640  17
   1   2  -3 4713.31 157.107  11
  -1   2   3 4822.93 158.318  18
   1   2  -3 4474.05 158.792   1
   1  -2  -2 3535.33 121.344  13
   1   2  -2 3501.17 122.688   6
   1   2  -2 3477.36 117.788  15
   1   2  -2 3520.78 119.872  11
  -1   2   2 3568.42 120.992  18
   1   2  -2 3408.93 123.137   1
   1   2  -1 140.508 21.8349   6
   1   2  -1 170.455 16.5981  15
   1   2  -1 190.125 17.4660  11
   1  -2  -1 190.344 20.2952  13
   1   2  -1 137.847 21.3123   1
   1   2   0-1.48715 22.3061   5
   1   2   0 8.23735 19.7985   6
   1   2   0 11.1650 12.3572  11
   1  -2   0 37.1223 16.1625  13
  -1   2   0-13.5501 21.8026   5
   1   2   0 24.9241 13.9051  15
  -1   2  -1 133.017 22.9153   6
  -1   2  -1 140.663 16.5772  18
  -1   2  -1 134.988 22.9069  21
  -1   2  -1 114.470 21.6296   1
   1   2   1 149.655 15.0429  11
   1   2   1 123.431 26.2174   5
  -1   2  -2 3667.93 129.043   1
  -1   2  -2 3646.16 128.476  21
  -1   2  -2 3525.37 133.193  16
  -1   2  -2 3664.58 128.203   6
  -1   2  -2 3796.42 123.590  18
  -1   2  -3 4853.74 166.017  16
  -1   2  -3 4691.38 160.613  21
  -1   2  -3 4649.06 161.543   1
  -1  -2  -4 4159.43 139.020  12
  -1   2  -4 4171.56 149.706  16
  -1   2  -4 4181.14 145.224   1
  -1   2  -4 4130.34 143.896  21
  -1   2  -5 1538.10 64.5147  21
  -1   2  -5 1557.25 66.4144   1
  -1   2  -5 1638.86 71.1634  16
  -1  -2  -5 1527.30 60.5526  12
  -1   2  -6 3608.40 128.709  16
  -1  -2  -6 3290.50 116.394  12
  -1   2  -6 3222.63 118.114   2
  -1   2  -7 945.287 45.5848   2
  -1   2  -7 943.618 52.9532  16
  -1  -2  -7 871.780 43.3641  12
  -1   2  -8 2885.86 109.300   2
  -1   2  -8 3101.14 121.047  16
  -1  -2  -8 2866.96 107.162  12
  -1   2  -9 3176.90 122.916   2
  -1  -2  -9 3275.35 120.126  12
  -1   2  -9 3236.57 131.727  16
  -1  -2  -9 3303.75 124.266  19
  -1   2 -10 7.82015 19.0581   2
  -1  -2 -10 5.49980 19.7705  19
  -1  -2 -10 19.2179 19.6575   3
  -1   2 -10 23.3054 26.7898  16
  -1   2 -11 68.0342 17.6558  26
  -1   2 -11 88.0121 24.9182   2
  -1   2 -11 51.8588 28.7543  16
  -1  -2 -11 61.8877 20.3100   3
  -1   2 -12 114.490 25.8423   2
  -1   2 -12 100.975 19.9771  26
  -1  -2 -12 65.6837 25.6345   3
  -1   2 -12 76.1637 32.9517  16
  -1   2 -13 1111.42 77.7757  16
  -1  -2 -13 964.610 64.8279   4
  -1   2 -13 1319.78 65.0727   8
  -1   2 -13 1188.13 53.2052  26
  -1   2 -14 54.7140 20.0518  26
  -1   2 -14 55.2385 27.6077   8
  -1   2 -15 132.605 21.7479  26
  -1   2 -15 115.450 30.6847   8
  -1   2 -16 148.828 22.5759  26
  -1   2 -16 98.1385 27.4675   8
  -1   2 -17 66.9140 25.7138   8
  -1   2 -17 12.3005 17.1614  26
  -1   2 -18 96.0281 26.9493   8
  -1   2 -18 89.4408 18.3716  26
  -1   2 -19 80.4961 21.8439   8
  -1   2 -19 125.020 16.8178  26
  -1   2 -20 47.3336 17.3353   8
   1   3 -19 2.86747 15.8827   8
   1   3 -18 164.143 23.2933   8
   1   3 -17-4.48375 20.8322   8
  -1   3  17-22.3374 21.0641  29
  -1   3  16 182.461 27.5392  29
   1   3 -16 126.880 27.9137   8
   1   3 -15 163.633 30.3991   8
  -1   3  15 182.520 28.3397  29
   1   3 -14 22.5216 24.9922   8
  -1   3  14 43.2375 24.1416  29
   1   3 -13 862.869 54.5993   8
   1  -3 -13 979.043 44.9067  22
  -1   3  13 899.831 50.0421  29
   1   3 -12 105.959 30.3422   8
  -1   3  12 103.841 26.3030  29
   1   3 -11 361.890 35.8280   8
  -1   3  11 385.066 32.6740  29
   1   3 -10 423.013 37.1188   8
  -1   3  10 363.531 29.8054  29
  -1   3   9 2206.70 88.8898  29
   1   3  -9 2507.38 96.0576   8
   1   3  -9 2446.36 100.886  11
   1   3  -8 4693.36 156.219  25
   1   3  -8 4506.75 167.486  11
   1   3  -8 4612.40 163.727   8
  -1   3   8 4487.64 156.006  29
   1   3  -7 452.820 34.6688  11
  -1   3   7 468.905 34.4326  18
   1   3  -6 61.6953 19.2227  11
  -1   3   6 36.9588 18.2070  18
   1   3  -6 58.8192 20.7071   1
   1   3  -5 2967.17 116.614   1
   1   3  -5 2993.95 113.428  11
  -1   3   5 3053.32 113.332  18
   1   3  -4 1425.28 61.6308  11
   1   3  -4 1268.07 63.7790   1
  -1   3   4 1456.32 61.8063  18
  -1   3   3 110.133 18.5884  18
  -1   3   3 95.8731 28.3489   5
   1   3  -3 82.5718 20.8872   1
   1   3  -3 115.107 20.4649  11
   1   3  -2 1136.59 53.0430  11
   1   3  -2 1190.31 57.5395   6
  -1   3   2 1208.98 53.3398  18
   1   3  -2 1210.86 58.9315   1
  -1   3   2 1280.36 63.9764   5
   1   3  -1 3428.18 126.939   6
   1   3  -1 3454.08 120.890  15
  -1   3   1 3555.24 122.273  18
   1   3  -1 3241.13 128.128   1
   1   3  -1 3296.73 120.982  11
  -1   3   1 3509.71 131.332   5
  -1   3   0 160.507 29.0677   1
   1   3   0 144.742 28.1380   1
   1   3   0 167.519 20.6957  15
   1   3   0 117.472 27.1431   6
  -1   3   0 127.402 27.0650   6
  -1   3   0 163.462 20.3232  18
  -1   3   0 159.967 29.8430   5
   1   3   0 131.703 28.8582   5
  -1   3  -1 3486.00 127.112   6
  -1   3  -1 3217.21 119.011  18
  -1   3  -1 3535.06 129.055   1
   1   3   1 3458.84 121.264  15
   1   3   1 3318.38 129.308   5
  -1   3  -2 1244.24 61.6244   1
  -1   3  -2 1278.36 60.5758   6
   1   3   2 1263.79 65.1848   5
   1   3   3 150.773 29.9552   5
  -1   3  -3 110.294 22.3574   1
  -1   3  -4 1185.32 59.3791   1
  -1   3  -5 3108.55 120.673   1
  -1   3  -6 28.8949 23.1449   1
  -1   3  -6 145.334 30.0680  16
   1   3   7 408.130 30.8804  15
  -1   3  -7 360.769 41.3394  16
  -1  -3  -8 4700.79 159.539  22
   1   3   8 4713.57 161.905  29
  -1   3  -8 4911.77 186.349  16
  -1   3  -8 4811.79 167.658   8
  -1   3  -9 2154.06 90.2077   8
  -1  -3  -9 2083.45 79.0099  22
   1   3   9 2097.54 81.5722  29
  -1   3  -9 2141.20 81.2802  25
  -1   3  -9 2152.72 104.711  16
  -1  -3 -10 341.981 25.5220  22
  -1   3 -10 357.084 34.7578   8
   1   3  10 383.302 29.7157  29
  -1   3 -10 403.544 45.2334  16
  -1   3 -11 423.754 40.3628   8
  -1  -3 -11 440.777 29.0522  22
   1   3  11 416.336 32.5570  29
  -1   3 -11 461.192 50.4672  16
  -1  -3 -12 109.667 19.2336  22
   1   3  12 101.519 24.9754  29
  -1   3 -12 74.5949 29.0364   8
  -1  -3 -13 902.263 43.6084  22
  -1   3 -13 916.353 56.2511   8
  -1   3 -14 54.7395 29.1757   8
  -1  -3 -14 59.1714 16.6291  22
  -1   3 -15 195.590 32.3271   8
   1   3  16 187.455 25.6229  24
  -1   3 -16 163.713 28.4784   8
   1   3  17 27.9993 24.9012  37
  -1   3 -17-6.87135 23.0191   8
   1   3  18 146.102 27.2760  37
  -1   3 -18 208.637 25.4893   8
  -1   3 -19 13.0099 16.3255   8
   1   3  19 23.1626 19.5067  37
  -1   4  18 14.2213 13.8961  24
  -1   4  18 9.45648 14.2488  29
  -1   4  17 162.526 21.0265  29
   1   4 -17 144.487 22.0192   8
  -1   4  16-9.69798 18.7017  29
   1   4 -16 2.00456 19.7905   8
   1  -4 -15 41.2179 14.1140  22
   1   4 -15 73.8870 23.7116   8
  -1   4  15 30.7721 20.4790  29
   1   4 -14 271.649 33.5425   8
   1  -4 -14 238.708 22.5617  22
  -1   4  14 268.259 29.1051  29
   1  -4 -13 23.6522 15.8782  22
   1   4 -13 10.7645 25.8524   8
  -1   4  13 50.4473 23.2093  29
   1   4 -12 295.884 36.8575   8
  -1   4  12 254.314 29.9309  29
   1  -4 -12 288.284 24.9825  22
   1  -4 -11 229.073 24.6021  22
   1   4 -11 299.535 35.5550   8
  -1   4  11 267.692 29.5555  29
  -1   4  10 291.262 30.2179  29
   1   4 -10 358.158 37.3526   8
  -1   4   9 219.096 27.0521  29
   1   4  -9 247.979 34.8145   8
  -1   4   8 216.413 26.5317  29
   1   4  -8 231.999 23.9903  25
   1   4  -8 261.787 35.1359   8
  -1   4   8 234.726 32.5359  18
  -1   4   8 214.382 49.2646   5
  -1   4   7 455.332 38.1153  18
   1   4  -7 531.403 31.2988  25
  -1   4   7 445.182 31.9082  29
  -1   4   7 459.673 56.3713   5
   1   4  -7 463.163 39.3535   8
   1   4  -6 180.404 20.8854  25
   1   4  -6 79.4042 26.1196   1
  -1   4   6 110.392 24.8838  18
   1   4  -6 142.547 32.2309   8
  -1   4   6 147.604 42.4398   5
   1   4  -5 523.430 31.0828  25
   1   4  -5 388.009 39.2207   1
   1   4  -5 517.589 41.9420   8
  -1   4   5 476.600 37.9177  18
   1   4  -5 559.917 33.4714   7
  -1   4   5 457.226 52.0027   5
   1   4  -4 853.343 56.4502   1
  -1   4   4 968.469 53.6087  18
  -1   4   4 1043.82 68.8028   5
   1   4  -4 919.247 45.8650   7
   1   4  -4 1012.02 44.7752  25
   1   4  -3 101.603 29.0011   1
  -1   4   3 103.414 23.2462  25
  -1   4   3 74.9753 22.6019  18
  -1   4   3 101.792 35.6924   5
   1   4  -3 96.6496 21.0321   7
  -1   4   2 162.374 24.0893  18
  -1   4   2 212.479 37.9514   5
  -1   4   2 191.704 37.7827   6
   1   4  -2 163.073 30.5512   1
   1   4  -1 1161.97 62.4385   6
  -1   4   1 1145.51 68.1548   1
  -1   4   1 1230.98 66.9939   6
   1   4  -1 1217.94 66.5630   1
  -1   4   1 1022.22 54.5247  18
  -1   4   0 65.4387 27.9138   1
   1   4   0 85.1503 28.0464   1
   1   4   0 45.1928 18.6717  15
   1   4   0 44.8173 28.1318   6
  -1   4   0 62.5114 27.6738   6
  -1   4  -1 1138.43 65.0444   1
  -1   4  -1 1123.19 63.7407   6
   1   4   1 1074.34 64.7106   6
   1   4   1 1222.82 56.9207  15
   1   4   1 1145.66 65.8080   1
   1   4   2 154.716 22.3111  15
   1   4   2 156.713 34.2848   6
   1   4   2 150.385 31.3400   1
  -1   4  -2 182.943 30.7426   1
  -1   4  -2 148.654 29.6284   6
   1   4   2 105.470 33.2398   5
  -1   4  -3 70.5907 20.1057  25
   1   4   3 44.8508 21.0012  15
   1   4   3 63.1480 34.1363   5
  -1   4  -3 76.6105 26.9601   1
  -1   4  -4 1066.81 48.0772  25
   1   4   4 1065.96 56.5816  15
  -1   4  -4 1049.48 49.1718   7
   1   4   4 981.291 68.1992   5
  -1   4  -4 1068.93 62.4124   1
   1   4   4 984.859 47.7955  29
   1   4   4 1186.85 54.5706  37
  -1   4  -5 482.029 40.9158   1
   1   4   5 484.914 37.1670  15
  -1   4  -5 585.423 33.3338   7
  -1   4  -5 490.759 31.8996  25
   1   4   5 501.768 32.3802  29
  -1   4  -5 470.128 38.9235   8
   1   4   5 417.061 50.8404   5
   1   4   5 561.880 38.4917  37
  -1   4  -6 87.5911 26.4780   1
   1   4   6 152.520 28.3389  37
  -1   4  -6 144.187 30.1353   8
   1   4   6 118.331 22.6639  15
  -1  -4  -6 139.502 17.0135  22
   1   4   6 59.2471 36.6834   5
   1   4   6 129.122 22.9035  29
  -1   4  -6 163.095 21.9483  25
   1   4   7 477.481 32.9853  29
   1   4   7 444.145 38.3428  15
   1   4   7 504.272 38.0383  37
   1   4   7 439.745 52.7340   5
  -1   4  -7 516.871 31.5255  25
  -1   4  -7 381.490 39.4974   8
  -1  -4  -7 445.510 27.9320  22
   1   4   8 231.137 26.0217  29
  -1   4  -8 174.171 22.4741  25
   1   4   8 210.201 30.7688  37
   1   4   8 170.329 43.0676   5
  -1  -4  -8 232.895 22.2377  22
  -1   4  -8 231.108 32.5070   8
   1   4   9 200.426 32.6030  37
  -1  -4  -9 227.970 23.0541  22
  -1   4  -9 161.559 22.8069  25
   1   4   9 241.139 26.9607  29
  -1   4  -9 159.545 32.2260   8
   1   4   9 198.971 47.1940   5
   1   4  10 339.539 31.1573  29
   1   4  10 366.157 37.8964  37
  -1  -4 -10 402.731 28.0816  22
  -1   4 -10 375.879 39.7313   8
   1   4  11 177.025 31.4461  37
  -1  -4 -11 225.279 23.5568  22
  -1   4 -11 165.159 32.9186   8
   1   4  11 216.114 27.1268  29
   1   4  12 370.864 36.0305  37
  -1  -4 -12 273.264 25.7222  22
  -1   4 -12 314.166 36.8066   8
   1   4  12 299.006 29.7857  29
   1   4  13 20.0988 25.8575  37
  -1  -4 -13 38.7353 16.8549  22
   1   4  13 32.5966 21.6162  29
  -1   4 -13 27.4075 25.1332   8
   1   4  14 296.288 28.5881  24
   1   4  14 178.245 28.9718  37
   1   4  14 240.437 26.3643  29
  -1   4 -14 235.930 31.2047   8
   1   4  15 30.8674 19.5366  24
  -1   4 -15 44.8505 22.4786   8
   1   4  15 60.5153 24.7892  37
   1   4  15 28.3427 19.7864  29
   1   4  16 46.8424 19.0589  24
   1   4  16 10.3507 21.1314  37
  -1   4 -16 34.8061 22.4289   8
   1   4  17 103.187 18.9084  24
  -1   4 -17 106.905 21.7367   8
  -1   5  16 14.8391 12.7663  24
  -1   5  16-0.97166 13.0259  29
  -1   5  15 18.1991 14.2201  24
   1  -5 -15 32.7870 11.5051  22
  -1   5  15 35.0799 15.9182  29
   1  -5 -14 145.268 16.4207  22
  -1   5  14 128.330 20.3813  29
   1  -5 -13 135.099 17.3009  22
  -1   5  13 129.169 21.6786  29
  -1   5  12 470.247 33.5694  29
   1  -5 -12 562.635 31.3798  22
   1  -5 -11 76.4848 16.9455  22
  -1   5  11 78.6602 21.7478  29
   1  -5 -10 56.9092 16.3595  22
  -1   5  10 49.5122 20.7665  29
  -1   5   9 114.405 26.4393  25
   1  -5  -9 89.1812 18.0334  22
  -1   5   9 73.8732 21.5936  29
   1   5  -8 36.4974 17.9426  25
   1  -5  -8 57.9485 15.9975  22
   1   5  -7 48.9627 17.6913  25
  -1   5   7 43.2272 24.5940  25
  -1   5   6 23.9533 24.9706  25
   1   5  -6 14.3328 17.8550  25
   1   5  -5 388.511 29.2237  25
  -1   5   5 308.217 33.7191  25
   1   5  -4 782.871 40.5524  25
   1   5  -4 724.749 41.9360   7
  -1   5   4 698.431 63.6739   6
  -1   5   4 773.932 66.7553   5
  -1   5   4 741.416 46.7117  25
   1   5  -3 55.8650 22.4547   7
  -1   5   3 38.9479 32.5733   6
  -1   5   3 54.4564 26.7722   7
  -1   5   3 70.0524 33.0833   1
  -1   5   3 72.9448 24.5843  25
  -1   5   2 19.9661 22.4881  25
   1   5  -2 15.1801 20.5630   7
  -1   5   2-4.65884 31.3259   6
  -1   5   2-30.6419 23.4801   7
  -1   5   2 10.3186 31.1291   1
   1   5  -2 21.6738 25.5137   1
  -1   5   1 162.438 27.7529   7
  -1   5   1 167.535 37.7175   1
  -1   5   1 192.099 26.5309  25
   1   5  -1 157.333 25.9298   7
  -1   5   1 174.325 38.0128   6
   1   5  -1 124.361 31.4142   1
  -1   5   0-14.2103 25.9205   1
  -1   5   0-4.29988 30.9082   6
  -1   5   0-6.30447 20.7473  25
   1   5   0-4.59916 26.6069   1
  -1   5   0 18.3290 22.3980   7
   1   5   0 4.16631 28.0139   6
   1   5   0-11.9844 20.4200   7
  -1   5  -1 191.326 26.9130   7
   1   5   1 183.284 27.3775   7
   1   5   1 158.893 34.9425   6
  -1   5  -1 182.815 34.0328   1
  -1   5  -1 168.096 24.7922  25
   1   5   1 171.337 35.2161   1
  -1   5  -2 33.9031 19.5154  25
   1   5   2 14.8816 22.7526   7
   1   5   2-8.93556 28.8503   6
  -1   5  -2 17.7006 25.3786   1
   1   5   2 19.7513 29.5547   1
   1   5   2 10.1424 19.3914  15
  -1   5  -2 7.68214 20.9207   7
  -1   5  -3 34.6332 25.3276   1
   1   5   3 52.2463 20.4058  15
  -1   5  -3 86.1135 20.8580  25
  -1   5  -3 54.5226 22.0641   7
   1   5   3 70.1835 25.3846   7
   1   5   3 41.8137 30.0512   6
   1   5   4 838.447 66.8902   5
   1   5   4 585.213 47.4505  15
  -1   5  -4 850.614 43.3153   7
  -1   5  -4 818.906 42.8582  25
   1   5   4 610.847 60.0910   6
   1   5   4 759.947 41.4767  29
  -1   5  -5 378.076 30.3435  25
   1   5   5 402.041 31.5321  29
  -1   5  -6-3.75064 17.6580  25
   1   5   6 1.84776 20.8570  29
  -1   5  -7 50.2789 19.1679  25
   1   5   7 11.2739 19.9731  29
  -1   5  -8 55.0764 18.6556  25
   1   5   8 60.5294 21.5352  29
  -1  -5  -8 68.6929 16.6899  22
   1   5   9 107.985 21.4798  24
   1   5   9 114.949 22.8312  29
  -1   5  -9 109.766 19.6256  25
  -1  -5  -9 123.015 18.2702  22
   1   5  10 55.5456 21.3471  29
  -1  -5 -10 53.0561 16.1074  22
   1   5  10 55.0050 20.1560  24
   1   5  11 62.5559 21.1904  29
   1   5  11 54.1277 19.2566  24
  -1  -5 -11 45.2331 16.4556  22
   1   5  12 541.779 33.2169  29
   1   5  12 414.800 31.0672  24
   1   5  13 140.840 21.0905  29
   1   5  13 127.857 21.1970  24
   1   5  14 116.061 19.3447  24
   1   5  14 163.271 20.7212  29
   1   5  15 66.5340 16.6600  24
   1   5  15 48.7632 15.1995  29
   1   5  16-1.08724 12.4689  24
  -1   6  13 91.8143 15.1274   7
  -1   6  13 117.384 13.8346  29
   1  -6 -12 43.1317 11.2279  22
  -1   6  12 32.1329 15.8867   7
  -1   6  12 67.0668 14.1785  29
   1  -6 -11 14.8859 11.2330  22
  -1   6  11-8.71592 16.8828   7
   1  -6 -10 25.4740 12.8065  22
  -1   6  10 52.7044 20.2579   7
  -1   6   9 150.651 24.6143   7
  -1   6   8 283.179 29.5612   7
  -1   6   7 166.337 24.8079  25
  -1   6   7 121.436 26.2543   7
  -1   6   6 558.242 37.9827   7
  -1   6   6 449.624 34.8851  25
   1   6  -6 533.623 31.9200  25
  -1   6   5 73.8421 25.2111   7
   1   6  -5 75.1559 17.4318  25
  -1   6   5 43.8908 22.6272  25
  -1   6   4 6.35958 20.1734  25
  -1   6   4 54.6297 24.6216   7
  -1   6   3 1098.48 55.4400   7
  -1   6   3 1068.44 54.0731  25
  -1   6   2 1361.16 63.8264   7
  -1   6   2 1289.25 61.1473  25
   1   6  -2 1377.27 60.2487   7
  -1   6   1 165.836 24.4563  25
   1   6  -1 170.552 25.2930   7
  -1   6   1 134.770 25.8228   7
  -1   6   0 49.5797 20.3817  25
  -1   6   0 65.7943 24.3458   7
   1   6   0 26.0894 21.0757   7
   1   6   1 118.771 24.3864   7
  -1   6  -1 146.085 25.0039   7
  -1   6  -1 151.884 22.9485  25
  -1   6  -2 1166.31 56.1110  25
  -1   6  -2 1292.55 57.6180   7
   1   6   2 1189.97 58.5357   7
  -1   6  -3 1082.51 51.0867  25
   1   6   3 958.154 51.4509   7
  -1   6  -4 26.3793 19.2207  25
   1   6   4 16.8475 21.1743   7
   1   6   5 94.0660 25.3499   7
  -1   6  -5 119.881 20.6404  25
   1   6   6 420.591 30.0765  29
   1   6   6 401.973 34.6614   7
  -1   6  -7 133.765 19.9035  25
   1   6   7 140.874 25.6817   7
   1   6   7 127.862 20.3941  29
   1   6   8 263.004 24.5960  29
   1   6   8 268.156 28.7781   7
  -1   6  -8 302.555 24.4799  25
   1   6   9 202.756 25.3306   7
   1   6   9 135.298 20.0316  29
   1   6  10 11.2666 18.3482   7
   1   6  10 32.3645 16.1897  29
   1   6  11 21.4500 17.4690   7
   1   6  11 9.75787 14.5762  29
   1   6  12 40.4903 16.5358   7
   1   6  12 67.3554 14.5950  29
   1   6  13 70.0161 15.0393   7
   1   6  13 120.714 14.4833  29
  -1   7   8 244.465 18.8738   7
  -1   7   7 56.3092 14.8756   7
  -1   7   6 118.173 17.0615   7
  -1   7   5 23.0881 14.8953   7
  -1   7   5 28.5505 13.3592  25
  -1   7   4 14.8496 15.5630   7
  -1   7   4 24.2229 14.3040  25
  -1   7   3 390.481 27.5180   7
  -1   7   3 483.982 27.4745  25
  -1   7   2 555.109 31.8757   7
  -1   7   2 546.465 30.3532  25
  -1   7   1 137.247 18.5088  25
  -1   7   1 191.986 21.0691   7
  -1   7   0 15.4421 14.0335  25
  -1   7  -1 176.220 19.8166  25
   1   7   1 197.788 20.7842   7
   1   7   2 526.778 31.2675   7
  -1   7  -2 601.427 31.5517  25
  -1   7  -3 441.749 26.2474  25
   1   7   3 388.484 26.7366   7
   1   7   4 26.2127 15.1289   7
  -1   7  -4 35.5064 13.3230  25
  -1   7  -5 56.3951 14.0463  25
   1   7   5 11.2230 14.9346   7
  -1   7  -6 108.372 14.9234  25
   1   7   6 96.5710 16.7457   7
   1   7   7 49.8101 14.0794   7
   1   7   8 234.043 18.5504   7
   2   0 -20 22.9311 11.9964  31
   2   0 -19 4.53859 13.9925  31
   2   0 -19-8.77568 13.0310  26
   2   0 -18 245.021 22.7901  26
   2   0 -18 270.491 23.1948  31
   2   0 -17-13.3936 16.2801  26
   2   0 -17-3.02474 17.6154  31
   2   0 -16 31.9760 19.3973  31
   2   0 -16 33.9544 17.9830  36
   2   0 -15-13.0454 16.6707  36
   2   0 -15 16.0958 19.5011  31
   2   0 -14 548.649 36.6019  34
   2   0 -14 610.626 35.6171  36
   2   0 -13 5.93540 15.7183  36
   2   0 -13 28.5196 18.5880  34
   2   0 -13 3.05036 21.5527   9
   2   0 -12 956.360 44.9278  34
   2   0 -12 947.759 43.4740  36
   2   0 -12 924.346 53.1244   9
   2   0 -11 8.63887 13.7167  36
   2   0 -11 27.6629 16.9347  34
   2   0 -11 31.4476 21.0614   9
   2   0 -10 937.640 48.0104   9
  -2   0  10 799.933 47.8570  17
   2   0  -9 1.88639 16.6077   9
  -2   0   9 8.32242 17.6100  17
  -2   0   8 2567.43 96.5241  17
   2   0  -8 2493.43 94.8452   9
   2   0  -7 13.2039 15.0440   9
  -2   0   7 7.95950 14.2289  17
   2   0  -6 8563.39 271.500  10
   2   0  -6 8471.01 272.724   9
  -2   0   6 8065.65 272.800  17
  -2   0   5 2.46731 13.3364  17
   2   0  -5 13.4694 13.3535  10
   2   0  -5 1.19652 15.2605   9
   2   0  -4 54.4702 13.2140  13
   2   0  -4 48.2080 14.5800  10
   2   0  -3 5.95824 12.6872  13
   2   0  -3-7.46715 11.7306  10
   2   0  -2 9634.27 308.308  20
   2   0  -1 1.07361 15.2137  20
   2   0   0 5215.80 174.135  20
  -2   0   0 5309.36 171.433  14
  -2   0  -1 12.1293 12.7038  14
  -2   0  -1 7.51315 9.51489  19
  -2   0  -2 10336.9 323.535  14
  -2   0  -2 9993.29 321.976  19
  -2   0  -3 9.62396 14.3823  14
  -2   0  -3 6.93313 13.1257  19
  -2   0  -4 66.5414 15.8250  14
  -2   0  -4 73.1022 16.7192  19
  -2   0  -5 10.1091 15.2553  19
  -2   0  -5 5.47846 14.4680  14
  -2   0  -6 8661.09 285.767  14
  -2   0  -6 8837.74 288.191  19
  -2   0  -7 8.50307 14.9691  12
  -2   0  -7 10.5169 17.8695  14
  -2   0  -7-4.05780 16.1571  19
  -2   0  -8 3040.16 106.771  12
  -2   0  -8 2772.95 108.897  14
  -2   0  -8 2862.57 112.568  19
  -2   0  -9-7.16969 16.3102  12
  -2   0  -9-13.8293 21.3002  19
  -2   0  -9-2.23288 17.2811  14
  -2   0 -10 765.831 50.9643  19
  -2   0 -10 864.096 44.9919  12
  -2   0 -11 2.27869 19.3648  12
  -2   0 -11 3.72794 15.9616  31
  -2   0 -11 3.65111 25.0234  19
  -2   0 -11-1.41934 14.8327  26
  -2   0 -12 824.536 40.4722  31
  -2   0 -12 805.434 59.3740  19
  -2   0 -12 865.895 42.7513  26
  -2   0 -13 13.6425 16.5873  26
  -2   0 -13 18.9205 18.2634  31
  -2   0 -13 13.7965 27.0718  19
  -2   0 -14 515.845 32.7946  31
  -2   0 -14 508.174 33.9205  26
  -2   0 -15-22.6740 18.8848  26
  -2   0 -15-11.0219 17.9438  31
  -2   0 -16 31.1540 18.1053  31
  -2   0 -16 51.0384 19.7406  26
  -2   0 -17 3.61414 18.0017  26
  -2   0 -17-13.2976 17.6857  31
  -2   0 -18 292.590 25.4586  26
  -2   0 -19-8.34379 14.9204  26
  -2   0 -20 10.9332 12.5431  26
   2  -1 -20 193.515 16.0850  31
   2  -1 -20 167.305 16.0658  26
   2   1 -20 135.552 14.6214  31
   2  -1 -19 155.401 18.3981  26
   2   1 -19 175.201 17.7883  31
   2  -1 -19 185.144 18.4651  31
   2   1 -18 13.6071 15.0921  31
   2  -1 -18 13.6066 15.2523  26
   2  -1 -18 43.4736 17.2038  31
   2  -1 -17 487.180 31.1178  31
   2   1 -17 493.597 30.1619  31
   2  -1 -17 470.510 29.9944  36
   2   1 -16 85.8575 18.7202  31
   2  -1 -16 76.7724 18.7026  36
   2  -1 -16 91.1129 21.3733  31
   2  -1 -15 4791.60 156.443  31
   2   1 -15 4448.50 157.055  34
   2   1 -15 4489.18 154.657  31
   2  -1 -15 4281.69 154.507  36
   2   1 -14 3213.43 117.501  34
   2  -1 -14 3229.48 115.278  36
   2   1 -13 2248.71 85.0423  36
   2   1 -13 2266.24 86.7235  34
   2  -1 -13 2170.98 85.0647  32
   2  -1 -13 2316.08 84.9069  36
   2  -1 -13 2230.06 98.4374   9
   2   1 -12 46.1068 16.4742  36
   2   1 -12 26.5993 16.7261  34
   2  -1 -12 37.3019 15.8706  32
   2  -1 -12 19.2352 15.5377  36
   2  -1 -12 22.6314 22.3379   9
  -2   1  12 27.0694 25.9450  17
   2   1 -11 2731.62 98.2303  34
   2  -1 -11 2688.76 97.7091  32
   2  -1 -11 2715.41 96.6389  36
   2  -1 -11 2693.67 108.340   9
  -2   1  11 2611.31 110.904  17
   2   1 -11 2780.72 97.1115  36
   2  -1 -10 3176.59 122.243   9
   2   1 -10 3305.84 122.287   9
  -2   1  10 3306.56 125.343  17
   2  -1  -9 11628.9 376.373   9
   2   1  -9 11424.9 375.568   9
  -2   1   9 11553.0 378.457  17
   2   1  -8 4102.67 147.969  11
   2  -1  -8 4188.53 147.309   9
  -2   1   8 4131.46 148.807  17
  -2  -1   8 4406.43 150.819  17
  -2  -1   7 231.064 24.3701  17
   2  -1  -7 199.793 22.1511   9
  -2   1   7 188.794 21.3363  17
   2  -1  -6 447.765 27.8226   9
  -2   1   6 414.493 27.5146  17
   2  -1  -5 25726.6 797.489   9
  -2   1   5 25070.9 797.258  17
   2  -1  -4 5132.03 174.475  13
   2  -1  -4 5131.04 171.134   9
  -2   1   4 5207.11 170.400  17
   2  -1  -3 1569.80 64.7710  13
  -2   1   3 1661.88 60.2531  17
   2  -1  -2 2364.60 90.5996  13
  -2   1   2 2441.63 91.7230  21
   2   1  -2 2376.14 86.4167  10
  -2   1   2 2517.81 84.0798  17
  -2   1   1 91627.5 2850.23  21
   2  -1  -1 92042.9 2851.05  20
   2   1  -1 91615.3 2845.21  10
  -2   1   1 91758.8 2842.70  17
  -2   1   0 194836. 6183.29  21
   2  -1   0 199865. 6184.38  20
   2   1   0 200649. 6177.50  10
  -2   1   0 200520. 6174.63  17
   2   1   1 87410.6 2721.21  10
   2  -1   1 88548.2 2728.68  20
   2  -1   2 2077.20 80.6631  20
  -2   1  -2 2048.83 76.4945  19
  -2   1  -3 1611.00 64.2411  19
   2  -1   3 1644.62 66.3084  20
  -2   1  -4 5004.07 170.323  19
  -2   1  -5 25867.3 816.080  19
  -2   1  -5 25788.2 814.128  14
  -2   1  -6 449.998 30.8551  14
  -2   1  -6 399.362 31.4610  19
  -2   1  -7 139.630 21.4940  14
  -2   1  -7 144.796 24.6510  19
  -2  -1  -7 143.946 22.7239  19
  -2  -1  -7 172.135 21.8517  12
  -2   1  -8 4250.19 152.114  14
  -2  -1  -8 4025.00 153.070  19
  -2   1  -8 4242.41 157.576  19
  -2  -1  -8 4401.96 149.673  12
  -2  -1  -9 11549.9 381.525  12
  -2   1  -9 12235.7 393.009  19
  -2  -1  -9 11456.3 387.654  19
  -2  -1 -10 3288.49 122.589  12
  -2  -1 -10 3340.63 129.710  19
  -2   1 -10 3130.91 132.160  19
  -2   1 -11 2410.19 90.8141  31
  -2  -1 -11 2734.74 104.148  12
  -2  -1 -11 2535.73 92.3834  31
  -2  -1 -11 2703.94 112.774  19
  -2   1 -11 2637.82 94.6952  26
  -2   1 -12 39.9549 17.7865  26
  -2   1 -12 9.09753 16.4444  31
  -2  -1 -12 16.7210 17.3675  31
  -2  -1 -12 63.6985 26.4315  19
  -2   1 -13 1925.93 77.0308  31
  -2  -1 -13 2206.15 79.3033  31
  -2  -1 -13 2011.80 101.333  19
  -2   1 -13 2024.56 80.9800  26
  -2   1 -14 2923.43 108.580  31
  -2  -1 -14 3153.63 110.734  31
  -2   1 -14 3144.52 114.164  26
  -2   1 -15 3982.07 139.357  31
  -2  -1 -15 4204.51 141.255  31
  -2   1 -15 3900.06 143.643  26
  -2   1 -16 56.8079 17.5945  31
  -2  -1 -16 70.3747 19.4670  31
  -2   1 -16 114.530 21.5824  26
  -2  -1 -17 393.919 27.7026  31
  -2   1 -17 321.369 25.1905  31
  -2   1 -17 408.654 30.0055  26
  -2   1 -18 1.63476 16.2845  26
  -2   1 -19 130.172 18.2066  26
   2   1  20 157.541 24.4380  39
  -2   1 -20 129.418 15.3409  26
   2  -2 -20 24.9694 10.6426  26
   2  -2 -19 15.7627 13.4299  26
   2  -2 -18-8.34071 14.1738  26
  -2   2  17 35.9786 24.1339  29
   2   2 -16 672.809 36.3816  34
   2  -2 -16 610.812 34.4609  36
  -2   2  16 625.260 43.2358  29
   2  -2 -15 215.732 22.6184  36
  -2   2  15 201.438 30.3398  29
   2   2 -15 239.733 24.2355  34
   2  -2 -14 92.9322 18.3436  36
   2   2 -14 107.581 20.8254  34
   2   2 -13 640.918 37.6126  34
   2  -2 -13 703.854 36.4646  36
   2   2 -12 75.6414 18.8235  34
   2  -2 -12 67.8331 18.0548  32
   2  -2 -12 64.3133 17.2733  36
   2   2 -11 1328.64 54.8062  34
   2  -2 -11 1249.72 54.4236  32
   2  -2 -11 1235.75 52.5605  36
  -2   2  11 1190.31 67.2576  17
   2  -2 -10 47.7411 15.8777  32
   2  -2 -10 20.1183 14.8002  36
  -2   2  10 29.5890 22.1189  17
   2   2 -10 26.3787 15.2981  34
   2  -2  -9 33.0068 14.7362  32
   2   2  -9 33.5596 16.9146  11
   2   2  -9 11.4583 13.5700  34
  -2   2   9 7.76293 20.5215  17
   2   2  -8 317.432 29.5411  11
  -2   2   8 302.208 29.7664  17
   2   2  -7 6178.50 210.287  11
  -2   2   7 5931.64 211.730  18
  -2   2   7 6215.53 208.853  17
   2   2  -6 133.383 20.9603  11
  -2   2   6 132.506 20.2812  17
   2   2  -5 26.8248 15.7882  11
  -2   2   5 50.3820 16.2533  17
   2   2  -4 5058.13 172.696  11
  -2   2   4 4768.36 168.697  17
   2   2  -3 1621.39 64.9265  11
   2  -2  -3 1601.30 67.7281  13
  -2   2   3 1577.79 61.6015  17
   2  -2  -2 173.886 22.2968  13
   2   2  -2 112.198 16.7661  11
  -2   2   1 185.321 25.2892  21
   2   2  -1 232.315 18.8260  11
   2  -2  -1 209.549 23.6909  13
   2   2   0 1333.88 52.7751  11
  -2   2   0 1306.32 60.5128  21
   2   2   0 1353.88 54.1031  15
  -2   2  -1 236.619 26.4296  21
   2  -2   1 194.438 24.6769  20
   2   2   1 185.099 19.6742  15
  -2   2  -2 64.7665 21.8571  21
   2  -2   2 108.481 22.0444  20
   2   2   2 116.648 17.2246  15
  -2   2  -3 1686.55 72.7385  16
   2   2   3 1730.25 67.8206  15
  -2   2  -3 1711.49 72.1536  21
   2  -2   3 1619.84 71.1860  20
   2   2   4 4749.70 168.724  15
  -2   2  -4 5078.13 173.879  21
   2  -2   4 4633.81 171.495  20
  -2   2  -5 63.8614 22.7436  16
   2   2   5 64.6009 14.8039  15
  -2   2  -5 54.2932 20.9384  21
  -2   2  -6 155.799 26.6390  16
   2   2   6 86.7539 17.5365  15
  -2  -2  -6 130.227 21.4963  12
  -2   2  -6 106.125 24.6158  21
  -2   2  -7 6677.80 222.609  16
  -2  -2  -7 6004.98 209.034  12
  -2   2  -7 6038.48 215.041  21
  -2  -2  -8 418.995 31.3052  12
  -2   2  -8 444.136 41.4707  16
  -2   2  -9 12.7742 16.1047  26
  -2  -2  -9 53.5469 22.4934  12
  -2   2  -9 3.86019 25.9615  16
  -2  -2  -9 8.74720 20.3623  19
  -2   2 -10 20.0121 17.2612  26
  -2  -2 -10 12.2499 19.9610  12
  -2  -2 -10 25.9478 23.4508  19
  -2  -2 -10 9.11625 13.5067  22
  -2   2 -10 8.65383 29.2853  16
  -2  -2 -11 1353.95 66.8432  12
  -2   2 -11 1393.86 81.0997  16
  -2  -2 -11 1287.90 72.0379  19
  -2   2 -11 1402.98 59.5439  26
  -2   2 -12 70.2549 20.6090  26
  -2  -2 -12 32.2093 26.6076  19
  -2   2 -12 89.6527 34.5792  16
  -2   2 -13 708.246 40.2772  26
  -2   2 -14 100.097 22.0639  26
  -2   2 -15 201.745 24.3522  26
  -2   2 -16 576.944 36.0669  26
  -2   2 -17 23.8967 16.3004  26
  -2   2 -18 4.40654 15.1429  26
   2   2  19 74.0869 24.8452  37
   2   2  20 24.2085 19.8363  37
   2  -3 -19 525.691 25.1282  26
  -2   3  18 172.420 23.0149  29
   2  -3 -18 168.973 16.9172  26
  -2   3  17 30.1420 21.6303  29
  -2   3  16 77.2353 23.6785  29
  -2   3  15 1770.56 76.3933  29
  -2   3  14 2317.21 90.2228  29
   2   3 -14 2082.87 82.5370  34
  -2   3  13 583.823 40.0957  29
   2   3 -13 552.364 33.1771  34
  -2   3  12 412.698 35.5858  29
   2   3 -12 396.644 28.9153  34
   2   3 -11 1905.67 74.3837  34
  -2   3  11 1886.46 78.6703  29
   2   3 -10 634.762 48.4909  11
  -2   3  10 624.154 39.6195  29
   2   3  -9 2297.72 84.3464  34
  -2   3   9 2248.21 86.6070  33
   2   3  -9 2206.83 99.1361  11
   2   3  -8 470.119 28.4289  34
  -2   3   8 471.963 30.4101  33
   2   3  -8 463.558 37.3331  11
  -2   3   7 617.314 33.1609  33
   2   3  -7 679.386 43.2949  11
  -2   3   7 563.031 42.5100  18
   2   3  -7 589.997 31.5001  34
   2   3  -6 741.265 44.1829  11
  -2   3   6 681.946 45.4087  18
   2   3  -5 4240.71 158.139  11
  -2   3   5 4551.83 161.503  18
   2   3  -4 6864.62 237.171  11
  -2   3   4 7101.80 239.745  18
   2   3  -3 84.6884 18.5163  11
  -2   3   3 89.0448 20.8730  18
   2  -3  -2 253.981 28.0594  13
   2   3  -2 189.002 24.0503  11
  -2   3   2 206.054 27.6705  18
   2  -3  -1 4542.63 160.233  13
  -2   3   1 4448.73 158.700  18
   2   3  -1 4435.60 156.471  15
   2   3   0 12037.7 386.946  15
  -2   3   0 11743.2 387.260  18
   2   3   1 4589.78 161.903  15
   2   3   2 239.492 26.0028  15
   2   3   3 56.1840 17.3842  15
  -2   3  -3 65.3335 24.3480  21
   2   3   4 7424.19 259.401  15
  -2   3  -4 8035.57 264.286  21
   2   3   5 4024.03 150.316  15
  -2   3  -5 4119.88 154.440  21
  -2   3  -5 4372.79 163.998  16
  -2   3  -6 892.368 58.5482  16
   2   3   6 781.145 46.1447  15
   2   3   7 603.852 39.2980  37
  -2  -3  -7 628.071 32.3461  22
   2   3   7 633.252 40.2779  15
   2   3   7 635.682 35.6945  29
  -2   3  -7 652.259 51.7584  16
  -2  -3  -8 369.764 25.6622  22
  -2   3  -8 358.108 43.7151  16
   2   3   8 380.272 29.4328  29
  -2  -3  -9 2025.45 78.6898  22
   2   3   9 2188.41 81.6730  29
  -2   3  -9 1951.00 105.249  16
  -2   3 -10 726.250 63.7807  16
  -2  -3 -10 757.518 53.1661  19
  -2  -3 -10 768.693 38.8848  22
  -2   3 -10 741.906 40.0772  26
   2   3  11 2116.32 82.4348  24
  -2  -3 -11 1963.37 77.5688  22
  -2  -3 -11 2038.39 96.7607  19
  -2   3 -11 1961.06 108.009  16
  -2   3 -11 1935.03 78.9961  26
   2   3  12 484.343 36.0794  24
  -2   3 -12 468.110 33.2778  26
   2   3  13 564.314 37.9497  24
   2   3  14 2347.80 93.2697  24
   2   3  15 1763.67 75.2795  24
   2   3  16 128.593 28.3906  37
   2   3  17 5.83554 23.2354  37
   2   3  18 141.359 25.9660  37
   2   3  19 480.038 32.1893  37
  -2   4  17 52.4357 16.6892  29
  -2   4  16 16.3005 18.2456  29
   2  -4 -15 379.803 24.0998  22
  -2   4  15 363.440 29.9493  29
   2  -4 -14 10.2394 13.9181  22
  -2   4  14 29.3987 21.4507  29
   2  -4 -13 66.5855 17.3383  22
  -2   4  13 79.3414 23.2193  29
  -2   4  12 369.707 32.6294  29
  -2   4  11 334.070 31.4070  29
  -2   4  10 67.0766 22.9386  29
   2   4  -9 32.6512 16.3999  34
  -2   4   9 16.6524 21.7037  29
  -2   4   8 215.533 30.7772  18
   2   4  -8 232.564 23.1909  34
   2   4  -7 1720.75 68.4878  34
   2   4  -7 1778.37 85.9442  11
  -2   4   7 1712.15 84.3445  18
   2   4  -6 91.8061 17.1470  34
   2   4  -6 114.319 26.2978  11
  -2   4   6 74.4079 23.4972  18
   2   4  -5 53.6137 17.2237  34
   2   4  -5 71.4375 21.8872  11
  -2   4   5 25.6144 19.9903  18
   2   4  -4 133.730 24.6297  11
  -2   4   4 133.250 25.2999  18
   2   4  -4 120.344 18.4593  34
   2   4  -3 2014.31 77.9184  34
  -2   4   3 2144.32 89.6633  18
  -2   4   2 108.086 23.2910  25
  -2   4   2 148.351 24.8443  18
   2   4  -2 68.3375 20.7665  27
   2   4  -1 873.462 44.0219  27
  -2   4   1 888.905 47.3379  25
  -2   4   1 844.865 48.8798  18
   2   4   0 1269.24 64.0175  15
  -2   4   0 1297.95 59.9686  25
   2   4   0 1357.29 56.2762  29
   2   4   0 1348.86 58.1279  27
   2   4   1 876.199 51.1858  15
   2   4   1 920.136 44.4283  29
   2   4   1 924.048 46.5894  27
  -2   4  -1 966.001 47.3059  25
  -2   4  -2 101.224 22.1782  25
   2   4   2 102.177 20.2265  29
   2   4   2 56.4496 22.5603  27
   2   4   2 126.140 21.8424  15
  -2   4  -3 1937.20 76.2782  25
   2   4   3 1910.22 75.7523  29
   2   4   3 1911.09 85.9660  15
   2   4   4 122.454 27.1294  37
   2   4   4 131.678 23.7328  15
  -2   4  -4 112.339 19.8906  25
   2   4   4 100.508 21.2697  29
   2   4   5 21.4022 24.6648  37
  -2   4  -5 32.7631 17.9434  25
   2   4   5 50.2157 20.2523  29
   2   4   5-3.17976 17.9195  15
   2   4   6 69.3808 20.3958  24
   2   4   6 76.1315 23.2622  15
  -2  -4  -6 80.5149 16.7328  22
   2   4   6 125.732 27.3856  37
   2   4   6 103.460 22.5437  29
   2   4   7 1751.53 79.7736  37
   2   4   7 1725.02 85.6175  15
   2   4   7 1892.38 74.8385  29
   2   4   7 1746.08 73.8427  24
  -2  -4  -7 1869.80 71.8485  22
   2   4   8 206.444 32.2201  37
  -2  -4  -8 195.506 22.3833  22
   2   4   8 211.690 26.9477  29
   2   4   8 207.727 26.1071  24
   2   4   9 56.6987 29.5549  37
   2   4   9 32.2464 20.5319  24
  -2  -4  -9 32.3808 16.8286  22
   2   4   9 68.8910 22.1894  29
   2   4  10 49.7754 22.2385  24
  -2  -4 -10 41.8474 18.9967  22
   2   4  10 58.3467 22.9849  29
   2   4  10 35.8128 25.7829  37
   2   4  11 283.800 35.7608  37
   2   4  11 322.529 30.2266  24
   2   4  11 397.763 31.2090  29
   2   4  12 353.942 37.1545  37
   2   4  12 405.886 32.3019  24
   2   4  12 398.078 31.4110  29
   2   4  13 63.1656 28.4830  37
   2   4  13 26.6447 21.2229  24
   2   4  14-2.11554 24.2659  37
   2   4  14 25.2435 18.7676  24
   2   4  15 255.763 30.4611  37
   2   4  15 341.267 27.8860  24
   2   4  16 21.8481 21.3220  37
   2   4  16 10.8881 17.8845  24
   2   4  17 39.3014 15.8233  24
   2   4  17-8.33438 18.8686  37
   2  -5 -15 19.5068 9.71388  22
  -2   5  15 2.05678 13.6097  29
  -2   5  14 47.2487 18.0148  25
   2  -5 -14 54.7877 12.7495  22
  -2   5  14 28.3511 16.2008  29
  -2   5  13 17.4425 18.1876  25
   2  -5 -13 20.3357 13.6808  22
  -2   5  13 15.4048 16.7716  29
  -2   5  12 233.368 28.3968  25
  -2   5  12 289.462 26.0738  29
   2  -5 -12 254.783 21.9827  22
   2  -5 -11 232.333 21.5961  22
  -2   5  11 209.591 24.5629  29
  -2   5  10 589.081 42.0005  25
  -2   5   9 373.597 36.1893  25
  -2   5   8 155.968 29.5659  25
  -2   5   7 66.3955 27.4018  25
  -2   5   6 286.831 34.4629  25
  -2   5   5 1731.85 79.9899  25
   2   5  -5 1815.22 71.3875  34
   2   5  -4 4202.20 144.035  34
  -2   5   4 3994.91 151.824  25
   2   5  -3 1219.04 53.4721  34
  -2   5   3 1088.25 59.8852  25
  -2   5   2 1269.98 66.6314  25
   2   5  -2 1537.23 62.3654  34
  -2   5   1 440.254 36.2248  25
   2   5  -1 367.653 31.5945  27
  -2   5   0 1797.23 77.3084  25
   2   5   0 1825.97 75.3288  27
  -2   5  -1 366.351 32.2884  25
   2   5   1 323.782 28.5830  29
   2   5   1 375.134 32.8063  27
   2   5   2 1168.46 55.0517  29
   2   5   2 1212.92 58.5772  27
  -2   5  -2 1168.42 57.0673  25
  -2   5  -3 1020.37 52.0794  25
   2   5   3 1090.36 51.5491  29
   2   5   3 1073.52 53.9537  27
  -2   5  -4 3820.08 136.372  25
   2   5   4 3752.83 135.057  29
   2   5   4 3772.21 137.779  27
  -2   5  -5 1758.47 75.7021  25
   2   5   5 1916.24 76.6992  29
   2   5   5 1922.56 79.8775  27
  -2   5  -6 330.897 28.0181  25
   2   5   6 303.110 28.9081  29
   2   5   6 272.106 31.2004  27
   2   5   7 69.6339 20.8657  29
  -2   5  -7 43.0941 17.9649  25
   2   5   8 162.159 24.8546  29
   2   5   8 157.321 23.3943  24
  -2   5  -8 140.815 21.2915  25
   2   5   9 404.495 36.9756  37
   2   5   9 496.054 32.8791  29
   2   5   9 419.095 31.6476  24
   2   5  10 616.719 37.1515  24
   2   5  10 610.901 41.6078  37
   2   5  10 620.232 37.0750  29
   2   5  11 174.128 23.2741  24
   2   5  11 215.934 29.1323  37
   2   5  11 169.346 22.9556  29
   2   5  12 196.264 28.4043  37
   2   5  12 212.174 23.6494  24
   2   5  12 226.665 23.6648  29
   2   5  13 15.1361 20.4629  37
   2   5  13 23.5529 16.7219  24
   2   5  13 8.21314 16.4583  29
   2   5  14 50.1954 16.3689  24
   2   5  14 41.1440 15.8196  29
   2   5  15 14.1438 13.8167  24
   2   5  15-2.05078 14.2743  27
  -2   6  12-10.4759 12.2268  25
   2  -6 -12 8.12964 8.76569  22
   2  -6 -11 14.2153 10.4188  22
  -2   6  11 39.9217 16.2882  25
  -2   6  10 32.9518 17.4024  25
   2  -6 -10 60.0804 12.1648  22
  -2   6   9 1.68327 17.5909  25
  -2   6   8 66.3100 21.2701  25
  -2   6   7 177.461 25.3805  25
  -2   6   6 24.7362 20.6087  25
  -2   6   5 27.7104 22.2322  25
  -2   6   4 179.513 26.7848  25
  -2   6   3 21.8088 21.5414  25
  -2   6   2 773.089 44.9383  25
  -2   6   1 145.059 23.8915  25
   2   6  -1 146.763 19.9818  34
  -2   6   0 386.112 31.0398  25
   2   6   0 398.367 28.2274  34
  -2   6  -1 117.655 22.3893  25
  -2   6  -2 774.985 42.4054  25
   2   6   2 779.796 41.0742  27
  -2   6  -3 65.8968 19.9513  25
   2   6   3 38.1634 20.3538  27
  -2   6  -4 169.943 22.8307  25
   2   6   4 148.197 23.0934  27
   2   6   5 22.7283 17.4461  29
   2   6   5 27.0740 19.7761  27
  -2   6  -5 50.0327 18.1073  25
  -2   6  -6 6.51323 14.5567  25
   2   6   6 38.0517 18.0656  29
   2   6   6 1.63906 17.3627  27
  -2   6  -7 264.436 21.8810  25
   2   6   7 140.496 21.1623  29
  -2   6  -8 36.7072 15.0010  25
   2   6   8 43.4727 17.3167  29
   2   6   9 9.44305 15.8151  29
   2   6  10 60.1467 15.6233  29
   2   6  11 36.9600 13.6841  29
   2   6  12 11.1086 12.2704  29
  -2   7   7 20.6226 11.5326  25
  -2   7   6 491.389 26.3379  25
  -2   7   5 256.369 20.1817  25
  -2   7   4 1394.75 55.3513  25
  -2   7   3 401.281 25.7331  25
  -2   7   2 113.695 17.0729  25
  -2   7   1 155.572 18.3228  25
  -2   7   0 13.3402 13.2557  25
  -2   7  -1 171.571 18.2839  25
  -2   7  -2 163.709 18.2983  25
  -2   7  -3 518.684 28.3661  25
  -2   7  -4 1671.18 62.8179  25
  -2   7  -5 256.828 18.8678  25
   2   7   6 412.037 22.4242  34
   2   7   7-5.51598 8.73083  34
   3   0 -20 159.535 13.7066  31
   3   0 -19 4.75244 12.6577  31
   3   0 -18 85.4115 16.9189  31
   3   0 -17 11.0405 16.6904  31
   3   0 -16 45.5665 18.0870  36
   3   0 -16 46.9794 19.0285  31
   3   0 -15 33.3563 17.0274  36
   3   0 -14 286.858 25.3732  36
   3   0 -14 340.043 28.0726  34
   3   0 -13 13.7788 16.8593  36
   3   0 -13 46.2484 19.3982  34
   3   0 -12 2041.06 76.7383  36
   3   0 -12 2010.56 78.0317  34
   3   0 -12 1990.21 76.2170  32
  -3   0  12 1845.08 92.9998  17
   3   0 -11 2.68841 14.0853  36
   3   0 -11 10.3327 15.8351  34
   3   0 -11-4.18429 14.4974  32
  -3   0  11 3.30438 24.4179  17
   3   0 -10 2717.06 96.5999  36
   3   0 -10 2696.47 97.3847  34
   3   0 -10 2780.44 97.3100  32
  -3   0  10 2655.93 110.745  17
  -3   0   9 15.5345 19.1381  17
  -3   0   8 55.9034 21.5618  17
  -3   0   7-8.30369 16.5316  17
   3   0  -7-1.84655 14.9750  10
   3   0  -6 4815.28 165.675  10
  -3   0   6 4774.68 166.492  17
   3   0  -5 25.7153 15.4006  10
  -3   0   5 23.2923 15.9919  17
   3   0  -4 18981.1 603.077  10
   3   0  -3 24.4320 16.0408  13
   3   0  -3 50.0987 16.4555  10
   3   0  -2 4803.91 165.441  20
   3   0  -1-5.07914 17.5504  20
  -3   0   0 6.72295 13.6297  14
   3   0   0-5.14528 17.1352  20
  -3   0  -1 26.5174 16.1516  14
   3   0   1 49.7006 18.7816  20
  -3   0  -2 4692.46 159.087  14
   3   0   2 4603.06 163.053  20
  -3   0  -3 62.3627 19.2753  14
  -3   0  -4 19567.7 622.648  14
  -3   0  -5 21.1436 17.2525  14
  -3   0  -5 22.4161 16.4591  19
  -3   0  -6 4382.11 161.880  14
  -3   0  -6 4788.49 164.110  19
  -3   0  -7-2.36063 18.4468  14
  -3   0  -7 5.02343 19.8152  19
  -3   0  -8 51.2702 20.2015  12
  -3   0  -8 20.3480 21.1712  19
  -3   0  -8 55.0420 22.1308  14
  -3   0  -9-8.72591 19.9347  14
  -3   0  -9 2.15561 18.4672  12
  -3   0  -9 3.32832 23.5131  19
  -3   0 -10 2533.81 94.9729  31
  -3   0 -10 2809.83 105.661  12
  -3   0 -10 2691.54 111.974  14
  -3   0 -10 2753.66 117.857  19
  -3   0 -11-18.2366 17.3368  31
  -3   0 -11 4.25606 26.4972  19
  -3   0 -12 1830.12 71.5426  31
  -3   0 -12 1804.64 96.0857  19
  -3   0 -13-3.10957 18.6481  31
  -3   0 -14 251.005 25.7103  26
  -3   0 -15-16.6518 17.0795  26
  -3   0 -16 76.2908 19.6074  26
  -3   0 -17-6.46799 16.1563  26
  -3   0 -18 66.8414 16.9303  26
   3   0  19 27.5924 21.4062  39
   3   0  20 162.615 22.0401  39
   3  -1 -19 9.91380 11.1668  26
   3  -1 -19 5.34430 12.1347  31
   3   1 -19 5.87285 11.3394  31
   3  -1 -18 436.871 26.7230  26
   3  -1 -18 465.551 26.6603  31
   3   1 -18 406.700 25.4385  31
   3  -1 -17 45.7336 16.3666  36
   3  -1 -17 45.6674 16.7275  31
   3   1 -17 54.7576 16.0751  31
   3   1 -16 666.158 37.6106  34
   3  -1 -16 713.458 37.0720  31
   3   1 -16 729.617 36.6608  31
   3  -1 -15 347.931 26.7711  36
   3   1 -15 323.598 27.7973  34
   3   1 -14 69.8305 19.2556  36
   3  -1 -14 53.5960 18.6814  36
   3   1 -14 23.2325 19.0702  34
   3  -1 -14 27.2780 17.5282  32
   3   1 -13 398.010 27.5852  36
   3  -1 -13 361.248 27.3336  36
   3   1 -13 350.476 28.7564  34
   3  -1 -13 357.280 27.7663  32
   3  -1 -12 100.986 19.2582  36
   3   1 -12 115.732 20.2291  34
   3  -1 -12 87.6634 18.9550  32
  -3   1  12 95.7720 29.2238  17
   3   1 -11-13.8415 16.9552  34
   3  -1 -11 7.00564 15.2969  36
   3  -1 -11 4.58616 15.5844  32
  -3   1  11 16.9950 23.7282  17
   3  -1 -10 706.706 34.9719  36
   3   1 -10 680.964 35.8472  34
   3  -1 -10 722.509 35.6811  32
  -3   1  10 559.801 45.2009  17
  -3  -1  10 668.425 46.9711  17
   3  -1  -9 673.733 33.3189  36
   3   1  -9 646.173 33.4758  34
   3  -1  -9 689.118 34.6977  32
  -3  -1   9 598.066 43.8480  17
  -3   1   8 1936.57 83.7749  17
  -3  -1   8 2148.18 88.0574  17
  -3   1   7 663.008 39.5595  17
  -3  -1   7 785.139 44.3970  17
   3  -1  -6 1659.68 66.4763  10
  -3   1   6 1561.50 66.7048  17
   3  -1  -5 28.1555 17.3143  13
  -3   1   5 21.8607 13.9224  17
   3   1  -4 163.576 21.1223  10
  -3   1   4 133.866 18.5028  17
   3  -1  -4 145.008 20.8592  13
   3  -1  -3 1792.34 75.3010  13
   3   1  -3 1778.10 72.7980  10
  -3   1   3 1924.85 69.7582  17
   3   1  -2 4479.29 157.104  10
  -3   1   2 4736.99 154.333  17
  -3   1   1 221.028 25.2102  21
   3  -1  -1 187.104 25.6232  20
   3   1  -1 169.447 18.7014  10
  -3   1   0-5.85363 17.4361  21
   3  -1   0-4.21509 19.6464  20
   3   1   0 2.42029 11.7293  10
   3  -1   1 224.390 26.2200  20
   3  -1   2 4293.59 154.752  20
   3  -1   3 1702.06 75.1784  20
   3  -1   4 157.908 25.1344  20
   3  -1   5 9.81710 20.5217  20
  -3  -1  -5 21.6372 16.8596  19
  -3   1  -6 1741.61 75.6267  19
  -3  -1  -6 1618.77 72.0549  19
  -3   1  -7 747.576 47.2135  19
  -3  -1  -7 665.757 43.0042  19
  -3  -1  -8 2163.30 85.2136  12
  -3  -1  -8 1967.64 86.2573  14
  -3   1  -8 1971.76 90.8434  19
  -3  -1  -8 1998.01 88.1482  19
  -3  -1  -9 652.819 47.3338  19
  -3  -1  -9 616.096 44.0791  14
  -3   1  -9 697.114 50.6353  19
  -3   1  -9 658.488 35.6810  26
  -3  -1  -9 670.568 42.0911  12
  -3  -1 -10 676.661 47.1056  14
  -3  -1 -10 737.039 44.6183  12
  -3  -1 -10 637.340 49.0956  19
  -3   1 -10 564.313 34.9517  26
  -3  -1 -11 3.55017 22.7612  14
  -3  -1 -11 22.4884 21.4331  12
  -3  -1 -11 7.20336 16.9963  31
  -3  -1 -11 33.0747 26.8821  19
  -3   1 -11-8.58327 16.9493  26
  -3   1 -12 104.040 21.7785  26
  -3  -1 -12 141.301 34.2278  19
  -3   1 -13 309.119 28.7156  26
  -3   1 -14 27.2431 18.9971  26
  -3   1 -15 313.297 28.3008  26
  -3   1 -16 572.388 35.3773  26
  -3   1 -17 52.7439 17.6667  26
   3   1  18 372.772 33.5199  39
  -3   1 -18 390.338 26.4897  26
   3   1  19-1.66468 19.8843  39
  -3   2  19-7.53300 16.7215  29
   3  -2 -19-11.4865 10.6023  26
  -3   2  18 296.164 28.6547  29
   3  -2 -17 84.9117 16.2768  36
  -3   2  17 72.8679 23.5514  29
   3  -2 -16 769.097 37.9115  36
   3   2 -16 760.057 38.6997  34
  -3   2  16 774.914 46.2956  29
   3  -2 -15 2.96238 15.7267  36
   3   2 -15-4.99263 16.8212  34
   3  -2 -14 63.2805 17.6186  36
   3   2 -14 92.0435 19.9213  34
   3  -2 -13 178.254 21.5084  36
   3   2 -13 174.462 22.1307  34
   3  -2 -13 118.932 21.0110  32
   3  -2 -12 240.200 23.1981  36
   3  -2 -12 200.426 23.4584  32
   3  -2 -11 232.132 22.9022  36
   3   2 -11 227.033 23.3309  34
   3  -2 -11 229.713 23.4136  32
  -3   2  11 200.065 34.1897  17
   3  -2 -10 1522.18 60.5732  36
   3   2 -10 1465.33 60.5800  34
   3  -2 -10 1512.09 61.3497  32
  -3   2  10 1615.10 77.5084  17
   3   2  -9 715.704 37.1634  34
   3  -2  -9 776.029 37.5100  36
  -3   2   9 758.135 40.5868  33
   3  -2  -9 731.013 37.5841  32
   3   2  -9 768.837 48.1955  11
  -3   2   9 779.309 48.6407  17
   3  -2  -8 2523.89 90.8846  36
   3  -2  -8 2416.94 90.4717  32
   3   2  -8 2483.85 104.020  11
   3   2  -8 2639.53 91.2944  34
  -3   2   8 2521.91 93.8073  28
  -3   2   8 2522.72 102.458  17
   3   2  -7 1109.58 59.2557  11
  -3   2   7 1212.61 57.4757  17
   3   2  -6 190.775 25.7237  11
  -3   2   6 234.820 25.1697  17
   3   2  -5 2135.03 88.7469  11
  -3   2   5 2242.00 85.6067  17
   3  -2  -4 3144.27 121.125  13
   3  -2  -3 1259.47 61.7355  13
   3  -2  -2 631.534 41.2318  13
   3  -2  -1 3254.73 122.686  13
  -3   2   1 3154.06 123.528  21
  -3   2   0 48.4374 25.2885  21
  -3   2  -1 3067.04 119.047  21
   3  -2   1 3061.80 119.524  20
  -3   2  -2 800.938 46.8171  21
   3  -2   2 697.005 45.4081  20
  -3   2  -3 1316.68 63.8902  21
   3  -2   3 1295.81 64.4365  20
  -3   2  -4 2922.67 115.741  21
   3  -2   4 2858.92 114.466  20
  -3   2  -5 2058.20 88.4617  21
   3  -2   5 1879.44 86.2362  20
  -3   2  -6 167.280 29.7187  21
   3  -2   6 219.395 29.3543  20
  -3  -2  -7 1134.18 55.4871  12
  -3   2  -7 1027.09 60.5795  21
  -3   2  -8 2628.95 114.168  16
   3   2   8 2507.28 93.5238  24
  -3  -2  -8 2516.92 101.542  12
  -3   2  -8 2499.62 109.494  21
  -3  -2  -8 2573.94 106.331  19
  -3   2  -8 2429.85 92.6400  26
   3   2   9 643.829 37.6730  24
  -3   2  -9 636.640 53.9694  16
  -3  -2  -9 562.218 46.0188  19
  -3  -2  -9 727.644 45.4244  12
  -3   2  -9 593.649 36.5926  26
  -3   2 -10 1433.79 85.2345  16
  -3  -2 -10 1410.62 77.8074  19
  -3  -2 -10 1476.73 71.3283  12
  -3   2 -10 1488.54 62.5251  26
  -3   2 -11 259.527 41.7473  16
  -3  -2 -11 213.460 34.3565  14
  -3   2 -11 293.163 27.9529  26
  -3  -2 -11 241.988 35.9064  19
  -3   2 -12 165.446 24.0890  26
  -3   2 -13 130.015 23.2423  26
  -3   2 -14 94.1164 21.0208  26
   3   2  15 4.30850 24.4286  39
  -3   2 -15 3.77032 18.7235  26
   3   2  16 585.451 40.3618  39
   3   2  17 101.950 26.4169  37
   3   2  17 50.4277 22.6930  39
   3   2  18 263.390 29.1475  37
   3   2  18 257.889 27.1709  39
   3   2  19 4.22533 20.1913  37
   3   2  19 6.50844 17.9822  39
   3  -3 -18 41.1033 11.5001  26
  -3   3  18 34.8140 16.4224  29
  -3   3  17 66.2103 19.6070  29
   3   3 -16 13.6946 13.6604  34
  -3   3  16-6.96714 20.8491  29
   3  -3 -15 37.1738 15.4035  36
   3   3 -15 20.0590 14.3460  34
  -3   3  15 42.1002 21.8686  29
   3  -3 -14 188.589 20.4005  36
   3   3 -14 171.131 21.0436  34
  -3   3  14 151.417 27.1971  29
   3  -3 -13 28.3804 15.9988  36
   3   3 -13 9.93083 16.8882  34
  -3   3  13 37.0249 23.6004  29
   3  -3 -12 107.697 18.7758  36
   3   3 -12 101.014 18.9768  34
  -3   3  12 109.529 25.9326  29
   3  -3 -11 96.0797 19.3035  36
   3   3 -11 115.350 19.6114  34
  -3   3  11 72.5963 21.8908  33
   3  -3 -10 41.4826 17.8276  36
   3   3 -10 8.17743 15.8656  34
   3  -3 -10 17.4157 15.3597  32
  -3   3  10 23.3252 19.9936  33
   3   3  -9 127.753 19.3325  34
  -3   3   9 131.004 23.0887  33
   3   3  -9 141.593 28.1391  11
   3  -3  -9 141.897 20.4960  36
   3   3  -8-7.60824 15.1218  34
  -3   3   8 31.2260 18.8531  33
   3  -3  -8 26.5586 16.8156  36
   3   3  -8 35.2082 19.0839  11
   3  -3  -7 21.5560 17.3767  36
   3   3  -7-8.82130 14.7325  34
  -3   3   7 24.3551 17.0142  33
   3   3  -7-9.85658 18.8403  11
  -3   3   7 8.31929 17.1533  28
  -3   3   7-7.11110 21.7962  18
   3  -3  -6 53.4324 17.9348  36
  -3   3   6 86.6057 19.6717  33
   3   3  -6 78.2961 17.0732  34
   3   3  -6 70.5251 22.7627  11
   3   3  -6 59.6758 16.7669  35
  -3   3   6 103.604 19.6981  28
  -3   3   6 30.3912 24.7788  18
   3   3  -5 80.4548 17.3131  35
   3   3  -5 81.6230 16.5715  34
  -3   3   5 62.6767 16.9161  33
   3   3  -5 19.8672 19.7894  11
  -3   3   5 66.1399 16.6040  28
  -3   3   5 44.0416 24.1837  18
   3   3  -4 1351.53 54.4745  34
   3   3  -4 1238.35 62.9121  11
  -3   3   4 1395.03 54.6681  33
  -3   3   4 1241.49 52.9918  28
   3   3  -4 1313.79 53.2318  35
   3  -3  -3 745.805 47.0829  13
   3   3  -3 684.482 42.0728  11
   3  -3  -2 1463.55 70.5534  13
   3  -3  -1 43.9023 22.8013  13
   3  -3   0 5.79921 20.6053  13
   3  -3   1 40.4932 21.8639  13
  -3   3  -2 1379.96 70.9209  21
  -3   3  -3 736.891 50.0273  21
   3   3   4 1219.00 58.8557  37
   3   3   4 1212.87 54.5994  24
  -3   3  -4 1228.87 55.8881  23
  -3   3  -4 1237.67 67.4562  21
   3   3   4 1308.69 54.1388  29
   3   3   5 53.6935 18.9553  24
   3   3   5 63.2790 24.7966  37
  -3   3  -5 75.7391 24.9647  21
   3   3   5 68.2221 20.4561  29
   3   3   6 61.4466 25.2048  37
   3   3   6 77.0499 19.8471  24
  -3   3  -6 46.3017 23.5452  21
   3   3   6 45.9274 19.0720  29
   3   3   7 43.0760 25.4908  37
   3   3   7 5.48976 19.0730  24
  -3   3  -7-11.1355 23.2818  21
   3   3   8 42.4820 26.3205  37
   3   3   8 34.4078 21.3586  24
   3   3   9 114.280 29.3779  37
   3   3   9 115.451 23.6928  24
  -3  -3  -9 110.161 28.1764  19
   3   3  10 49.8242 29.0000  37
   3   3  10 18.5530 20.1865  24
   3   3  11 74.1061 28.6884  37
   3   3  11 63.3471 21.4438  24
   3   3  12 107.563 28.2682  37
   3   3  12 93.6536 21.9734  24
   3   3  13 18.5521 24.2405  37
   3   3  13 16.7904 19.5062  24
   3   3  14 238.151 31.4295  37
   3   3  14 227.140 26.5713  24
   3   3  15 29.6099 24.5417  37
   3   3  16-1.92480 23.2268  37
   3   3  17 136.022 24.6401  37
  -3   3 -18 52.1520 12.8020  23
   3   3  18 45.4244 20.3753  37
  -3   4  16 29.5880 16.0960  29
   3   4 -15 72.0910 13.8207  34
  -3   4  15 75.9505 19.5015  29
   3   4 -14 4.94982 12.7266  34
   3  -4 -14 7.59860 12.7689  22
  -3   4  14 38.0761 19.9417  29
   3   4 -13 784.805 38.9443  34
  -3   4  13 901.296 44.4541  29
   3   4 -12 258.910 22.6052  34
  -3   4  12 237.651 27.5401  29
   3   4 -11 17.4092 15.2497  34
  -3   4  11 7.36757 20.7951  29
   3   4 -10 11.4196 14.9525  34
   3   4  -9 969.372 46.2031  34
   3   4  -8 692.758 37.5302  34
   3   4  -7 13.2721 16.7255  34
   3   4  -6 148.959 20.3853  34
  -3   4   6 154.525 22.3580  33
  -3   4   6 99.2169 26.6617  18
   3  -4  -5 1124.57 50.8506  36
   3   4  -5 1125.85 50.7050  34
  -3   4   5 1199.52 52.1326  33
  -3   4   5 1061.16 64.9906  18
   3   4  -4 643.394 36.1029  34
  -3   4   4 685.407 36.6579  33
  -3   4   4 645.271 47.0050  18
  -3   4   3 235.514 30.2145  25
  -3   4   3 196.194 29.6799  18
   3   4  -3 198.826 22.9758  34
   3   4  -3 206.766 21.2800  35
  -3   4   2 13.1536 24.4243  25
   3   4  -2 32.2493 15.8534  35
  -3   4   2 61.5096 20.7818  18
   3   4  -2 26.6621 20.3379  27
  -3   4   1 152.158 25.4856  18
   3   4  -1 177.501 24.2782  27
  -3   4   1 171.807 27.2158  25
   3   4   0-17.5470 21.8118  27
  -3   4  -1 189.288 26.4150  23
   3   4   1 191.714 25.7436  27
  -3   4  -2 20.3076 21.8520  23
   3   4   2 22.0340 19.7090  29
   3   4   2 26.1361 22.1261  27
  -3   4  -3 152.132 25.3296  23
   3   4   3 167.609 23.6871  29
   3   4   3 217.232 26.7504  27
  -3   4  -4 697.918 40.6309  23
   3   4   4 699.422 39.6609  24
   3   4   4 644.139 38.7987  29
   3   4   5 1415.47 66.1856  37
   3   4   5 1215.65 58.6273  24
  -3   4  -5 1335.87 60.6869  23
   3   4   5 1291.26 59.0577  29
   3   4   6 79.5118 22.8451  24
  -3   4  -6 119.869 23.2619  23
   3   4   6 129.196 31.3599  37
   3   4   6 119.623 22.7342  29
   3   4   7 50.1360 29.6500  37
   3   4   7 38.7958 19.9104  24
  -3   4  -7 62.4820 22.1648  23
   3   4   7 47.5676 21.2222  29
   3   4   8 615.753 45.6185  37
   3   4   8 600.211 39.4927  24
  -3   4  -8 698.615 41.0034  23
   3   4   8 718.246 39.9256  29
   3   4   9 747.366 49.7511  37
   3   4   9 871.343 47.3605  24
  -3   4  -9 912.860 47.3506  23
   3   4   9 886.799 45.3121  29
   3   4  10 31.6687 21.1841  24
   3   4  10 28.7512 27.6220  37
  -3   4 -10 44.5187 21.5700  23
   3   4  11-4.67823 25.2381  37
   3   4  11 45.7629 21.1062  24
  -3   4 -11 39.5467 20.6850  23
   3   4  12 233.153 31.5181  37
   3   4  12 172.635 25.5542  24
  -3   4 -12 219.116 25.3276  23
   3   4  13 926.362 51.2700  37
   3   4  13 928.694 46.5453  24
  -3   4 -13 889.981 45.6270  23
   3   4  14 3.83084 22.9735  37
   3   4  14-6.90314 17.7421  24
   3   4  15 89.3897 22.5544  37
   3   4  16 41.2216 19.6769  37
  -3   5  14 58.7174 16.5467  25
   3  -5 -14 127.973 13.1399  22
  -3   5  13 42.5953 18.4945  25
   3  -5 -13 88.4724 13.4266  22
  -3   5  12 56.5835 20.7091  25
   3  -5 -12 24.6013 13.6347  22
  -3   5  11 31.7998 20.9951  25
   3   5 -11 4.92564 11.9406  34
  -3   5  10 58.7013 24.2147  25
   3   5 -10 19.0042 13.3487  34
  -3   5   9 281.204 32.6142  25
   3   5  -9 360.539 24.9443  34
  -3   5   8 284.897 34.4239  25
   3   5  -8 356.274 25.3852  34
  -3   5   7 167.988 30.2085  25
   3   5  -7 149.601 20.1838  34
  -3   5   6 966.321 55.6117  25
   3   5  -6 1061.69 48.0205  34
  -3   5   5 168.019 30.4912  25
   3   5  -5 135.859 20.4432  34
   3   5  -4 12.3209 17.8440  34
  -3   5   4 2.51818 24.7122  25
  -3   5   3 1300.64 66.0187  25
   3   5  -3 1395.55 59.9412  34
  -3   5   2 1589.42 73.0264  25
   3   5  -2 1619.41 67.4833  34
  -3   5   1 209.359 30.6051  25
   3   5  -1 274.242 25.6706  34
   3   5  -1 220.342 26.2825  27
  -3   5   0-17.6785 21.8172  25
   3   5   0 5.74602 20.8599  27
   3   5   1 190.224 26.9025  27
  -3   5  -1 168.486 25.6546  25
  -3   5  -2 1519.26 66.9997  25
   3   5   2 1557.83 68.4722  27
   3   5   3 1374.93 63.9662  27
   3   5   4 67.4708 22.1740  29
   3   5   4 41.1874 23.3610  27
   3   5   5 192.407 25.8153  29
   3   5   5 179.944 28.1851  27
   3   5   6 898.359 45.9792  29
   3   5   6 809.356 47.2885  27
   3   5   7 155.650 22.3101  29
   3   5   7 105.431 24.5650  27
   3   5   8 295.012 26.8738  24
   3   5   8 224.094 25.6330  29
   3   5   8 268.035 29.6119  27
   3   5   9 322.654 27.9456  24
   3   5   9 321.977 27.0994  29
   3   5   9 328.400 30.4381  27
   3   5  10 42.3041 18.6313  24
   3   5  10 56.1731 18.0789  29
   3   5  11 11.4072 16.7531  29
   3   5  12 40.4258 16.0008  29
   3   5  12 55.8895 19.1470  27
   3   5  13 83.2619 17.5824  27
   3   5  14 84.3294 16.6460  27
   3  -6 -11 5.21843 8.66371  22
  -3   6  11-2.12251 12.9350  25
  -3   6  10 44.3617 16.2122  25
   3  -6 -10 67.3460 11.3219  22
  -3   6   9 2.91985 16.5930  25
  -3   6   8 138.864 20.8155  25
  -3   6   7 98.0558 21.2234  25
   3   6  -7 99.5503 14.2728  34
  -3   6   6 7.43587 18.7540  25
   3   6  -6 36.4915 13.4553  34
  -3   6   5 23.1256 20.2549  25
   3   6  -5 64.7816 14.3420  34
  -3   6   4 43.4738 20.6461  25
   3   6  -4 48.6012 14.7260  34
  -3   6   3 1.98611 19.0693  25
   3   6  -3 4.49059 14.0948  34
   3   6  -2 13.9690 14.5275  34
  -3   6   2 23.6597 19.5311  25
   3   6  -1 27.1401 15.2109  34
  -3   6   1 36.7801 19.0198  25
  -3   6   0 5.64243 17.9436  25
   3   6   0 6.51830 15.3959  34
   3   6   1 4.94957 15.4419  34
  -3   6  -1 36.2455 18.1679  25
  -3   6  -2 12.1609 16.1991  25
  -3   6  -3 6.61136 16.1712  25
   3   6   3 8.14397 18.6808  27
   3   6   4 57.7328 18.8822  27
   3   6   5 63.9294 19.2927  27
   3   6   6 5.97500 17.2081  27
   3   6   7 43.6212 18.0926  27
   3   6   8 158.557 20.3172  27
   3   6   9 15.2386 14.3509  27
   3   6  10 46.1598 13.9568  27
   3   6  11 1.72019 11.4722  27
  -3   7   5 24.8165 11.6407  25
  -3   7   4 70.4724 12.7993  25
  -3   7   3 7.27692 11.5456  25
  -3   7   2 18.2135 12.0507  25
  -3   7   1 39.8519 12.5217  25
   3   7  -1 22.4174 9.99458  34
  -3   7   0 1.06374 11.4131  25
   3   7   0 9.76932 9.35775  34
   3   7   1 34.9939 10.7942  34
  -3   7  -1 18.5807 11.1052  25
  -3   7  -2 23.6416 11.3173  25
   3   7   2 20.4365 10.2578  34
  -3   7  -3 28.4807 10.8380  25
   3   7   3-15.5412 9.92408  34
   3   7   4 64.2262 10.8167  34
   3   7   5 13.7638 9.32938  34
   4   0 -19 2.05140 9.66167  31
   4   0 -18 78.9037 14.4861  31
   4   0 -17-11.4624 14.7798  31
   4   0 -16 1188.76 50.0033  36
   4   0 -15-1.42099 14.8500  36
   4   0 -14 7462.44 249.619  36
   4   0 -14 7745.92 250.387  32
   4   0 -13 15.0054 17.1091  36
   4   0 -13 49.4477 18.4044  34
   4   0 -13 12.7505 15.8939  32
   4   0 -12 297.294 24.6135  36
   4   0 -12 306.376 25.6523  32
   4   0 -11 4.66619 15.4025  32
  -4   0  11 3.80752 24.0591  17
   4   0 -10 807.677 39.1099  32
  -4   0  10 729.979 52.2404  17
   4   0  -9-4.26739 14.8654  32
  -4   0   9 3.12944 21.3137  17
   4   0  -8 43.0730 15.3425  32
  -4   0   8 66.0665 22.2838  17
   4   0  -7 1.27325 13.4499  32
   4   0  -7 7.38332 17.7922  10
  -4   0   7 18.2491 19.7768  17
   4   0  -6 5837.85 202.171  10
  -4   0   6 5761.89 202.233  17
  -4   0   5 53.9857 21.1121  17
   4   0  -5 41.8474 20.2354  10
   4   0  -4 12097.3 394.150  10
  -4   0   4 12063.7 392.867  17
   4   0  -3 23.5812 16.5110  10
   4   0  -2 749.900 40.2617  10
   4   0  -1 8.85042 15.3477  10
   4   0   0 372.204 34.5144  20
   4   0   1 23.0958 22.9427  20
   4   0   2 741.816 46.7262  20
  -4   0  -2 739.739 42.7197  14
  -4   0  -3 48.3506 19.1062  14
   4   0   3 5.62430 22.3094  20
  -4   0  -4 11101.9 364.754  14
   4   0   4 10874.6 368.733  20
  -4   0  -5 84.6819 25.9941  14
   4   0   5 66.0338 26.8245  20
  -4   0  -6 5317.47 191.678  14
   4   0   7 35.5532 23.6848  39
  -4   0  -7 15.6229 23.1028  14
   4   0   8 86.2489 24.2461  39
  -4   0  -8 78.2275 25.6885  14
  -4   0  -8 106.101 24.4476  12
   4   0   9 3.95864 23.3559  39
  -4   0  -9 36.9181 25.9334  14
  -4   0 -10 676.317 52.8911  14
  -4   0 -10 704.216 55.3597  19
   4   0  10 660.957 42.9386  39
  -4   0 -11-12.8074 24.6982  14
   4   0  11 2.18366 24.9315  39
  -4   0 -11-4.83884 28.7211  19
   4   0  12 214.962 31.3865  39
   4   0  13 36.9086 26.0633  39
   4   0  14 6423.22 221.733  39
   4   0  15 4.45728 24.4511  39
   4   0  16 932.430 50.5508  39
   4   0  17 28.1744 22.3602  39
   4   0  18 49.5909 20.7141  39
   4  -1 -18 66.4040 13.0104  31
   4   1 -18 57.7200 12.4864  31
  -4   1  18 89.6130 20.2723  29
   4  -1 -17 155.838 17.2660  36
   4  -1 -17 156.800 18.0437  31
   4   1 -17 163.886 17.3170  31
   4  -1 -16 425.648 27.4047  36
   4  -1 -16 466.307 28.0344  31
   4   1 -16 479.358 28.1677  31
   4  -1 -15 445.349 28.5172  36
   4   1 -15 489.888 29.8041  34
   4  -1 -14 46.7677 16.8325  36
   4   1 -14 66.5584 18.9477  34
   4  -1 -14 8.20249 16.2866  32
   4  -1 -13 58.5783 17.7324  36
   4   1 -13 54.1671 18.6145  34
   4  -1 -13 62.7721 17.1948  32
   4  -1 -12 253.471 23.5833  36
   4   1 -12 225.331 24.1808  34
   4  -1 -12 293.814 24.9354  32
   4  -1 -11 13.5017 15.8078  36
   4   1 -11 4.81128 16.6283  34
   4  -1 -11 18.2103 16.5923  32
   4  -1 -10 384.562 26.1212  36
   4   1 -10 298.784 24.9721  34
   4  -1 -10 327.841 25.9818  32
  -4   1  10 319.555 36.9846  17
  -4  -1  10 332.714 37.5616  17
   4  -1  -9 1.37186 14.4139  36
   4  -1  -9 5.94389 14.7591  32
   4   1  -9-2.73887 13.8821  32
  -4  -1   9 3.46454 22.6824  17
  -4   1   9 30.9251 23.2182  17
   4  -1  -8 1827.98 68.0545  36
   4  -1  -8 1777.21 68.5942  32
   4   1  -8 1717.87 67.3740  32
  -4   1   8 1764.48 79.3131  17
  -4  -1   8 1684.60 81.7399  17
   4  -1  -7 138.441 17.7379  36
   4  -1  -7 123.365 17.6698  32
   4   1  -7 100.681 16.9382  32
  -4   1   7 119.942 23.5753  17
  -4  -1   7 97.4968 24.8589  17
   4  -1  -6 3357.55 114.783  32
   4  -1  -6 3166.18 124.264  10
  -4   1   6 3397.84 123.885  17
   4  -1  -5 261.711 29.5566  13
   4  -1  -5 330.628 29.1891  10
  -4   1   5 284.297 26.5525  17
   4  -1  -4 1300.79 64.2453  13
   4   1  -4 1346.46 61.6447  10
   4  -1  -3 1461.12 71.7039  13
   4   1  -3 1669.04 68.5959  10
   4  -1  -2 1233.34 62.3830  13
   4   1  -2 1299.57 57.6777  10
   4  -1  -1 1158.99 61.4694  20
   4   1  -1 1206.89 53.8772  10
   4  -1   0 131.128 26.4829  20
   4   1   0 146.463 19.3571  10
  -4   1  -1 1346.90 65.9416  21
   4  -1   1 1276.57 66.9449  20
   4  -1   2 1179.75 62.9878  20
   4  -1   3 1600.50 77.2223  20
  -4  -1  -4 1324.75 62.6938  14
   4  -1   4 1260.35 68.8535  20
  -4  -1  -5 260.521 30.7688  14
   4  -1   5 284.407 35.3258  20
   4   1   6 2958.41 113.259  39
   4  -1   6 2944.18 127.491  20
  -4  -1  -7 126.919 25.0444  14
   4  -1   7 68.9734 29.0614  20
   4   1   7 77.5486 25.4750  39
  -4  -1  -8 1937.98 85.0518  14
  -4  -1  -8 1796.61 80.5148  12
   4   1   8 1559.42 73.1142  39
   4  -1   8 1667.19 88.0144  20
  -4  -1  -8 1889.74 86.7521  19
   4   1   9 2.07859 24.7814  39
  -4  -1  -9 29.3816 23.5501  14
  -4  -1  -9 46.8118 24.8678  12
   4  -1   9-13.2331 28.0799  20
  -4  -1  -9 7.78637 24.9633  19
   4   1  10 280.180 33.7644  39
  -4  -1 -10 344.036 39.6745  14
  -4  -1 -10 390.586 37.2803  12
   4  -1  10 302.937 41.0804  20
  -4  -1 -10 353.916 41.4077  19
  -4   1 -10 278.442 27.2171  26
   4   1  11 31.5690 26.7548  39
  -4   1 -11 58.0246 19.5139  26
   4   1  12 243.083 32.9072  39
  -4   1 -12 255.805 26.8175  26
   4   1  13 42.0796 26.6014  39
   4   1  14 27.7030 26.0726  39
   4   1  15 334.474 34.3724  39
   4   1  16 317.159 31.9772  39
   4   1  17 143.586 25.6591  39
   4   1  18 26.5692 19.8766  39
   4  -2 -18 20.2596 9.96238  26
  -4   2  18 33.7076 16.8239  29
   4  -2 -17 191.668 16.9887  36
  -4   2  17 199.848 23.8545  29
   4  -2 -16 524.522 28.7019  36
   4   2 -16 538.637 29.7350  34
  -4   2  16 536.708 35.7353  29
   4  -2 -15 43.6680 15.2347  36
   4   2 -15 67.4867 16.8714  34
   4  -2 -14 57.7398 16.9724  36
   4   2 -14 54.3101 17.3532  34
   4  -2 -13 116.127 19.6262  36
   4   2 -13 101.927 19.6628  34
   4  -2 -13 82.9476 19.2698  32
   4  -2 -12 297.759 25.5023  36
   4   2 -12 245.544 25.0404  34
   4  -2 -12 307.402 25.7579  32
   4  -2 -11 86.3914 20.2303  36
   4   2 -11 114.971 20.5745  34
  -4   2  11 124.169 25.6993  33
   4  -2 -11 108.255 21.1977  32
   4  -2 -10 5797.08 192.443  36
   4   2 -10 5659.95 192.797  34
  -4   2  10 5700.62 196.507  33
   4  -2 -10 5707.03 193.136  32
   4  -2  -9 450.188 30.1001  36
   4   2  -9 386.429 27.8365  34
  -4   2   9 395.929 31.1534  33
   4  -2  -9 457.292 28.9473  32
   4   2  -9 465.564 41.1004  11
  -4   2   9 426.245 39.8433  17
  -4  -2   9 345.460 41.1056  17
   4  -2  -8 2402.91 89.3463  36
   4   2  -8 2449.16 89.1395  34
   4  -2  -8 2317.69 88.3574  32
   4   2  -8 2488.61 105.252  11
  -4   2   8 2399.98 92.5905  28
  -4   2   8 2590.38 103.557  17
  -4  -2   8 2231.71 105.809  17
   4  -2  -7 223.852 22.9909  36
   4   2  -7 230.241 21.6792  34
   4   2  -7 238.420 31.5002  11
  -4   2   7 202.081 25.4135  28
   4  -2  -6 1032.29 45.7246  36
   4   2  -6 1066.67 45.1312  35
   4   2  -6 1002.65 44.0784  34
   4   2  -6 991.348 56.3846  11
  -4   2   6 933.810 46.4945  28
   4  -2  -5 902.593 41.0291  36
   4   2  -5 828.725 39.8021  35
   4  -2  -5 869.672 52.8490  13
  -4   2   5 841.352 41.8351  28
   4  -2  -4 139.411 26.4105  13
   4   2  -4 118.744 19.3276  35
  -4   2   4 112.354 18.5450  28
   4  -2  -3 505.635 42.7500  13
   4  -2  -2 6653.12 236.572  13
   4  -2  -1 7294.11 256.483  13
  -4   2   0 56660.0 1783.53  21
  -4   2  -1 7218.21 254.997  21
   4  -2   1 7248.56 255.669  20
  -4   2  -2 6653.40 236.048  21
   4  -2   2 6502.88 236.191  20
  -4   2  -3 614.497 48.3480  21
   4  -2   3 627.337 49.8120  20
   4   2   4 105.403 20.9518  35
  -4   2  -4 103.674 23.8632  23
  -4   2  -4 70.3138 27.4881  21
   4  -2   4 50.8040 27.9517  20
   4   2   4 107.305 24.4289  39
  -4  -2  -5 958.888 52.1940  14
   4   2   5 759.484 41.1644  35
  -4   2  -5 809.638 55.8083  21
   4  -2   5 810.294 55.9989  20
   4   2   5 885.881 46.8156  39
  -4  -2  -6 811.803 51.6492  14
   4   2   6 852.757 47.5087  39
  -4   2  -6 843.771 59.0859  21
   4  -2   6 986.121 61.7720  20
  -4  -2  -7 311.420 35.2015  14
  -4   2  -7 310.564 39.3409  21
   4  -2   7 195.264 36.2070  20
  -4  -2  -7 273.577 33.9454  19
   4   2   7 246.922 30.7025  39
  -4  -2  -8 2192.91 102.466  14
   4   2   8 2391.28 90.0903  24
  -4  -2  -8 2494.90 101.147  12
  -4   2  -8 2554.95 111.715  21
  -4  -2  -8 2295.58 103.285  19
   4   2   8 1991.24 90.1568  39
  -4  -2  -9 409.574 40.2421  14
   4   2   9 421.839 31.7986  24
  -4   2  -9 372.377 42.9175  21
  -4  -2  -9 359.587 39.5227  19
   4   2   9 379.219 35.4561  39
   4   2  10 4773.81 169.988  39
   4   2  11 190.949 30.1489  39
   4   2  12 239.167 31.0859  39
   4   2  13 95.4879 27.1727  39
   4   2  14 38.4393 24.5195  39
   4   2  15 75.7796 24.5611  39
   4   2  16 492.701 34.7874  39
   4   2  17 173.978 23.6181  39
  -4   2 -18 17.3513 12.3430  23
   4   2  18-11.0735 16.3853  39
   4  -3 -17 23.5616 9.43336  36
  -4   3  17 17.1016 14.6434  29
   4  -3 -16 128.789 14.9244  36
   4   3 -16 185.368 16.6464  34
  -4   3  16 143.657 20.4378  29
   4  -3 -15 27.4516 13.2497  36
   4   3 -15 22.0386 13.2607  34
  -4   3  15 35.3821 18.7309  29
   4  -3 -14 118.388 17.0359  36
   4   3 -14 58.7307 16.8396  34
  -4   3  14 103.601 22.5311  29
   4  -3 -13 80.8368 16.9991  36
   4   3 -13 84.2396 17.9248  34
  -4   3  13 102.935 22.6865  29
   4  -3 -12 510.158 30.1456  36
   4   3 -12 425.475 29.4881  34
  -4   3  12 478.959 34.4638  33
  -4   3  12 398.554 32.5891  29
   4  -3 -11 171.803 21.3623  36
   4   3 -11 162.856 21.3624  34
  -4   3  11 190.339 25.6399  33
   4  -3 -11 152.482 20.2564  32
   4  -3 -10 75.2603 18.8290  36
   4   3 -10 46.9492 17.6293  34
  -4   3  10 70.5435 23.2469  33
   4  -3  -9 8.08640 17.0502  36
   4   3  -9 31.4843 17.4228  34
  -4   3   9 27.5453 19.7838  33
   4  -3  -8 43.6715 18.8715  36
   4   3  -8 55.4475 18.1437  34
  -4   3   8 54.9604 19.9297  33
  -4   3   8 66.6881 21.7930  28
   4  -3  -7 873.062 43.1951  36
   4   3  -7 904.612 43.3265  34
  -4   3   7 869.553 45.1652  33
  -4   3   7 935.554 45.7607  28
  -4   3   7 745.587 58.3474  18
   4  -3  -6 60.7586 18.2568  36
   4   3  -6 73.8379 17.4686  35
   4   3  -6 114.238 18.9685  34
  -4   3   6 77.5054 19.8179  33
   4   3  -6 74.4620 23.9688  11
  -4   3   6 78.0511 19.5700  28
   4  -3  -5 173.032 22.8408  36
   4   3  -5 143.973 21.0300  35
   4   3  -5 196.961 21.0169  34
  -4   3   5 165.337 21.7820  33
   4   3  -5 132.847 25.3237  11
  -4   3   5 169.626 21.4074  28
   4   3  -4 516.446 31.0693  35
   4   3  -4 514.575 30.2815  34
  -4   3   4 485.693 30.6164  33
  -4   3   4 475.846 30.7728  28
   4   3  -3 168.284 21.8462  35
   4   3  -3 169.565 20.2595  34
  -4   3   3 172.523 19.9589  28
   4   3  -2 33.2100 18.3045  35
   4  -3  -2 21.9634 23.6531  13
   4   3  -2 10.4787 16.2484  34
  -4   3   2 49.9535 15.8755  28
   4   3  -1 112.435 20.1090  35
   4  -3  -1 101.994 26.2504  13
   4   3   0 2019.81 76.3822  35
   4  -3   0 1948.93 92.0490  13
  -4   3   0 1927.93 82.4195  23
   4   3   1 196.236 22.1501  35
   4  -3   1 116.755 28.9200  13
  -4   3  -1 109.142 26.0691  23
  -4   3  -1 196.651 33.6383  21
   4   3   2 15.0226 18.7802  35
   4  -3   2 14.6822 24.5242  13
  -4   3  -2 37.7991 23.7628  23
  -4   3  -2-7.88971 24.5617  21
  -4   3  -3 120.440 25.5263  23
  -4   3  -3 172.114 33.0306  21
  -4   3  -4 368.192 32.3560  23
  -4   3  -4 351.059 40.0287  21
  -4   3  -5 149.399 25.6050  23
  -4   3  -5 147.240 31.0915  21
  -4   3  -6 69.1091 23.9316  23
  -4   3  -6 95.3653 27.9015  21
   4   3   7 754.758 49.6594  37
  -4   3  -7 863.983 46.7277  23
  -4   3  -7 787.015 59.2503  21
   4   3   8 9.11540 25.7560  37
   4   3   8 67.5573 22.3365  24
   4   3   9 2.30157 26.8054  37
   4   3   9 10.6685 20.0922  24
   4   3  10 89.7669 29.3467  37
   4   3  10 70.3873 23.2388  24
   4   3  11 140.801 28.7657  37
   4   3  12 420.455 36.3101  37
   4   3  13 106.429 27.1479  37
  -4  -3 -14 103.497 16.1481  38
   4   3  14 73.1516 24.5909  37
   4   3  15 1.71651 21.5409  37
  -4   3 -15 31.2260 17.0144  23
   4   3  16 144.684 23.2479  37
  -4   3 -16 152.020 18.3167  23
  -4   3 -17 7.02790 11.4387  23
   4   4 -15 365.968 20.1182  34
   4   4 -14 760.441 34.2690  34
   4  -4 -14 791.760 33.8608  22
   4  -4 -13 259.979 19.4258  36
   4   4 -13 232.168 20.1083  34
   4  -4 -12 45.3722 14.6445  36
   4   4 -12 38.0981 15.0923  34
   4  -4 -11 172.329 19.2964  36
   4   4 -11 200.698 20.4395  34
   4  -4 -10 26.2899 15.7820  36
   4   4 -10 40.7395 15.6429  34
   4  -4  -9 13.9175 15.6450  36
   4   4  -9 30.8419 15.9917  34
   4  -4  -8 6.44385 15.7118  36
   4   4  -8-9.98421 16.3292  34
  -4   4   8-3.80838 18.2827  33
   4  -4  -7 61.3097 18.4964  36
   4   4  -7 44.1116 16.9060  34
  -4   4   7 86.8668 20.9043  33
   4  -4  -6 1935.12 78.0968  36
   4   4  -6 2064.40 78.8640  34
  -4   4   6 2002.17 80.0537  33
   4  -4  -5 146.327 22.2998  36
   4   4  -5 152.563 22.0128  34
  -4   4   5 200.526 24.7405  33
   4   4  -4 5967.23 194.379  35
   4   4  -4 5653.46 195.655  34
  -4   4   4 5714.32 195.740  33
   4   4  -3 1614.99 66.6486  35
   4   4  -3 1596.47 67.8264  34
  -4   4   3 1710.39 67.3243  28
   4   4  -2 409.783 29.3950  35
   4   4  -2 404.434 30.4774  34
   4   4  -1 117.130 19.9559  35
   4   4  -1 122.008 21.5000  34
   4   4  -1 100.040 22.9711  27
   4   4   0 87.7048 19.2551  35
   4   4   0 60.6226 22.5143  27
   4   4   1 69.9134 24.1943  27
  -4   4  -2 347.454 32.5625  23
   4   4   2 328.169 33.4817  27
  -4   4  -3 1341.92 65.6072  23
   4   4   3 1383.18 64.1013  27
  -4   4  -4 5567.20 192.010  23
   4   4   4 5427.84 190.538  27
  -4   4  -5 144.371 26.0574  23
   4   4   5 113.312 26.7164  27
  -4   4  -6 1915.34 81.8911  23
   4   4   6 2025.09 79.6318  29
  -4   4  -7 57.8520 22.2773  23
   4   4   7 95.8495 22.1854  29
   4   4   8-11.6495 26.4212  37
  -4   4  -8 23.1799 21.3619  23
   4   4   9 15.9144 24.6492  37
  -4   4  -9 32.8744 21.7727  23
   4   4  10 28.4112 24.8047  37
  -4   4 -10 37.5404 19.7678  23
   4   4  11 162.953 28.3160  37
  -4   4 -11 160.182 23.8054  23
   4   4  12 43.8044 23.3709  37
  -4   4 -12 66.9096 20.2297  23
   4   4  13 260.280 27.6895  37
  -4   4 -13 312.011 25.2199  23
  -4  -4 -14 900.445 37.5375  38
  -4   4 -14 797.578 39.2777  23
  -4   4 -15 443.843 25.1501  23
  -4  -4 -15 468.748 23.6100  38
  -4   5  13 153.888 18.2876  25
   4   5 -13 174.887 13.4493  34
   4  -5 -13 180.109 13.9748  22
  -4   5  12 75.3396 17.9244  25
   4   5 -12 72.1612 11.9955  34
   4  -5 -12 77.2020 11.7446  22
  -4   5  11 149.755 21.6249  25
   4   5 -11 83.3332 13.8900  34
  -4   5  10 66.1940 20.2183  25
   4   5 -10 68.0695 14.0036  34
  -4   5   9 11.4698 21.4803  25
   4   5  -9 9.15660 12.8397  34
  -4   5   8 79.8945 23.1641  25
   4   5  -8 30.9118 14.1454  34
  -4   5   7 395.176 34.1792  25
   4   5  -7 396.534 26.4716  34
  -4   5   6 28.7545 22.4335  25
   4   5  -6 22.0383 15.0841  34
   4  -5  -5 48.0185 17.0810  36
  -4   5   5 4.46733 23.2502  25
   4   5  -5 52.4016 17.2954  34
   4  -5  -4 339.338 26.8354  36
  -4   5   4 274.178 31.5018  25
   4   5  -3 15.6247 15.9707  34
   4   5  -2 854.909 43.9581  34
   4   5  -1 72.2103 19.7866  34
   4   5   0 18.2998 16.4822  34
   4   5   1 33.2443 18.6499  34
   4   5   1 42.6944 21.1769  27
   4   5   2 743.525 42.7129  27
   4   5   3 32.2330 20.4679  27
   4   5   4 291.754 28.7637  27
   4   5   5 99.3532 23.7584  27
   4   5   6 56.8704 22.6476  27
   4   5   7 443.018 33.0026  27
   4   5   8 25.2727 18.7695  27
   4   5   9 18.8868 17.9787  27
   4   5  10 73.4487 19.2483  27
  -4  -5 -11 151.005 15.8072  38
   4   5  11 110.533 18.8889  27
  -4  -5 -12 102.415 13.3777  38
   4   5  12 66.6366 16.1743  27
  -4  -5 -13 193.258 14.6406  38
   4   5  13 135.362 16.5110  27
  -4   6   9-4.00312 12.5314  25
   4   6  -9-5.16527 7.93742  34
  -4   6   8 177.557 18.3446  25
   4   6  -8 150.516 13.4256  34
  -4   6   7 28.2035 15.3515  25
   4   6  -7 75.2045 12.1779  34
  -4   6   6 49.6154 16.9499  25
   4   6  -6 58.2920 12.7482  34
  -4   6   5 64.0433 17.1131  25
   4   6  -5 68.6316 13.7348  34
  -4   6   4 224.588 22.3345  25
   4   6  -4 210.649 18.7389  34
  -4   6   3-16.7322 16.0706  25
   4   6  -3-8.95003 12.7420  34
   4   6  -2 37.1644 14.1395  34
   4   6  -1 370.229 25.0188  34
   4   6   0 75.8009 15.4820  34
   4   6   1 380.989 25.1417  34
   4   6   2 60.1571 15.1509  34
   4   6   3 30.7639 14.1595  34
   4   6   4 149.847 18.2759  34
   4   6   5 65.0360 15.0054  34
   4   6   5 97.4840 17.6178  27
   4   6   6 26.3380 13.0768  34
   4   6   6 34.1380 14.8227  27
   4   6   7 15.2115 13.6885  27
   4   6   8 162.428 16.9794  27
   4   6   9 15.8608 9.76477  34
   4   6   9 0.85322 11.2137  27
   5   0 -17-10.6183 11.1482  31
   5   0 -16 94.0295 15.6784  31
   5   0 -15 4.73158 12.1277  32
   5   0 -14 286.901 22.5026  32
   5   0 -13-7.46088 14.8218  32
   5   0 -12 501.934 30.8950  32
   5   0 -11 12.8583 15.3384  32
   5   0 -10 1090.34 49.3631  32
   5   0  -9 19.0378 16.0464  32
   5   0  -8 1296.97 55.8998  32
  -5   0   8 1328.86 70.3512  17
   5   0  -7 13.4776 15.7336  32
   5   0  -7-3.12201 21.7946  10
  -5   0   7-12.4773 20.2816  17
   5   0  -6 4.34314 14.1221  32
   5   0  -6 12.0400 19.9762  10
  -5   0   6 14.4714 19.5887  17
   5   0  -5-5.78284 19.3185  10
  -5   0   5-16.1619 18.9207  17
   5   0  -4 376.440 34.5346  10
  -5   0   4 251.178 25.2308  28
   5   0  -3 10.6000 18.1624  10
  -5   0   3-1.54886 15.0126  28
   5   0  -2 601.790 37.8059  10
  -5   0   2 434.856 28.9594  28
  -5   0   1 1.53074 15.8238  30
   5   0  -1 2.43880 16.9223  10
  -5   0   1-4.32353 14.9796  28
  -5   0   0-10.6933 16.0502  30
   5   0   0 14.0979 16.5996  10
   5   0   0-13.0567 20.8144  39
  -5   0  -1 15.3873 16.7620  30
   5   0   1 8.44380 19.6286  39
  -5   0  -2 494.539 31.7615  30
   5   0   2 546.973 34.9775  39
   5   0   3-3.64849 20.9678  39
   5   0   3-7.59642 26.8327  20
  -5   0  -3 11.1011 17.8183  30
  -5   0  -4 269.529 22.4762  38
  -5   0  -4 305.142 25.3835  30
   5   0   4 219.574 35.2825  20
   5   0   4 308.558 30.7630  39
  -5   0  -5-24.4387 15.4693  38
   5   0   5 16.8219 27.1578  20
  -5   0  -5 3.32632 16.5751  30
   5   0   5-47.8987 25.6860  39
  -5   0  -6 14.6269 14.3969  38
   5   0   6-17.7143 28.5936  20
  -5   0  -6-5.12027 17.9319  30
   5   0   6-6.22662 24.1720  39
  -5   0  -7-8.93383 14.8333  38
   5   0   7-4.67838 28.4544  20
   5   0   7 2.14635 24.6156  39
   5   0   8 1218.95 79.3076  20
   5   0   8 1224.05 61.6508  39
   5   0   9 9.14508 26.1038  39
   5   0  10 920.579 52.7547  39
   5   0  11-18.5734 24.9761  39
   5   0  12 468.380 38.3725  39
   5   0  13 19.7975 23.1806  39
   5   0  14 189.032 28.1543  39
   5   0  15-9.32733 21.4909  39
   5   0  16 71.1237 21.1709  39
   5   0  17-1.32704 17.1966  39
   5  -1 -17 44.4153 11.3453  31
   5   1 -17 50.3920 10.7595  31
  -5   1  17 54.4173 16.9929  29
   5  -1 -16 82.5796 14.2734  36
   5  -1 -16 64.8293 14.2037  31
   5   1 -16 76.9891 13.6274  31
   5  -1 -15 23.6647 13.9233  36
   5  -1 -15 31.9991 13.4973  32
   5  -1 -14 178.846 19.7856  36
   5  -1 -14 200.931 19.9598  32
   5  -1 -13 25.9443 14.8396  36
   5  -1 -13 1.53478 15.0200  32
   5  -1 -12 233.663 22.3400  36
   5  -1 -12 281.469 24.0847  32
   5  -1 -11 95.4408 18.1687  36
   5  -1 -11 84.1614 17.9786  32
   5   1 -11 124.424 18.0696  32
   5  -1 -10 1241.92 53.1558  36
   5  -1 -10 1344.99 55.5421  32
   5   1 -10 1170.54 52.6020  32
   5  -1  -9 11.2467 15.7716  32
   5   1  -9 15.3709 14.7167  32
   5  -1  -8 52.8068 16.9361  32
   5   1  -8 91.6197 17.0219  32
   5  -1  -7 629.615 34.1036  32
   5   1  -7 634.886 34.0162  32
   5  -1  -7 585.262 44.9342  10
  -5  -1   7 680.239 49.5154  17
   5  -1  -6 36.9265 15.2769  32
   5  -1  -6 27.4811 21.8522  10
  -5   1   6 42.0478 19.3417  28
  -5  -1   6 36.1493 22.5508  17
   5  -1  -5 169.235 18.7402  32
   5  -1  -5 174.853 27.1588  10
  -5   1   5 124.871 20.9184  28
  -5  -1   5 114.056 26.1672  17
   5  -1  -4 2650.78 105.849  10
  -5   1   4 2480.55 94.8732  28
   5  -1  -3 1458.19 69.6374  10
   5   1  -3 1481.72 69.4563  10
  -5   1   3 1424.47 60.6746  28
   5  -1  -2 64.9198 24.1833  13
  -5   1   2 43.6795 18.1737  30
   5   1  -2 51.1161 19.5415  10
  -5   1   2 40.5682 16.5100  28
   5   1  -1 1001.47 46.3952  35
  -5   1   1 962.484 46.7433  30
  -5   1   1 910.311 43.7197  28
   5   1   0 80.3043 21.7697  35
  -5   1   0 62.5603 20.6205  30
  -5  -1   0 59.3631 17.6331  30
  -5   1   0 46.4571 16.7462  28
   5   1   0 63.5470 23.1489  39
  -5  -1  -1 942.518 44.9382  38
   5   1   1 959.318 47.4684  35
   5  -1   1 1061.77 63.1849  20
  -5   1  -1 983.494 46.4217  30
  -5  -1  -1 1058.19 46.7436  30
  -5   1  -1 995.997 44.4412  28
   5   1   1 1002.82 50.5135  39
  -5  -1  -2 71.1507 16.5339  38
   5   1   2 51.1374 22.0240  35
   5  -1   2 67.2633 29.6137  20
  -5   1  -2 53.1407 19.1849  30
  -5  -1  -2 42.1832 17.8616  30
  -5   1  -2 89.6009 16.6914  28
   5   1   2 49.2502 23.5736  39
  -5  -1  -3 1444.41 59.2598  38
   5   1   3 1291.14 61.0905  35
  -5   1  -3 1298.33 75.5579  21
   5  -1   3 1472.01 79.8945  20
  -5   1  -3 1550.52 62.6486  30
  -5  -1  -3 1456.46 60.5368  30
   5   1   3 1697.35 68.0141  39
  -5  -1  -4 2460.75 93.6883  38
   5  -1   4 2402.99 114.533  20
  -5   1  -4 2689.82 97.2028  30
  -5  -1  -4 2667.15 95.8549  30
   5   1   4 2590.66 101.149  39
  -5  -1  -5 158.106 19.6385  38
   5   1   5 149.455 29.1147  39
   5  -1   5 189.633 37.0600  20
  -5   1  -5 176.362 22.2489  30
  -5  -1  -5 161.884 22.2924  30
  -5  -1  -6 18.7474 14.7840  38
  -5  -1  -6 18.3050 23.3181  14
   5  -1   6 18.3402 27.4535  20
  -5  -1  -6 35.8066 19.2211  30
   5   1   6 66.0364 27.3671  39
  -5  -1  -7 664.982 35.5573  38
   5  -1   7 681.978 56.3849  20
   5   1   7 587.696 43.1484  39
  -5  -1  -8 66.1739 16.8264  38
   5   1   8 35.0394 28.1885  39
  -5  -1  -9 9.74658 15.1454  38
   5   1   9 7.11691 25.8373  39
  -5  -1 -10 1188.92 53.4345  38
   5   1  10 1307.46 63.4035  39
   5   1  11 142.075 29.6403  39
   5   1  12 191.716 29.2017  39
   5   1  13 17.6417 23.1136  39
   5   1  14 174.402 27.8931  39
   5   1  15 42.3054 22.6327  39
   5   1  16 52.7620 20.6016  39
   5   1  17 48.5883 17.9504  39
   5  -2 -16 78.3182 12.4981  36
  -5   2  16 103.663 18.0765  29
   5  -2 -15 87.2856 14.5505  36
   5   2 -15 84.2880 14.8508  34
  -5   2  15 78.8887 18.8648  29
   5  -2 -14 204.627 19.0613  36
   5   2 -14 159.817 18.5570  34
   5  -2 -13 6.60900 14.2165  36
   5   2 -13-16.9504 14.7224  34
   5  -2 -13 27.2633 14.9556  32
   5  -2 -12 24.2525 15.0318  36
   5   2 -12 10.5475 14.9239  34
  -5   2  12-23.0954 19.2311  33
   5  -2 -12 18.3950 15.1827  32
   5  -2 -11-1.49915 15.4124  36
   5   2 -11-9.32821 16.1601  34
  -5   2  11 13.8640 19.7296  33
   5  -2 -11 17.4365 15.2197  32
   5  -2 -10 135.795 19.9154  36
   5   2 -10 112.980 18.9451  34
  -5   2  10 166.720 24.1264  33
   5  -2 -10 142.222 19.8133  32
   5  -2  -9 18.7670 16.5652  36
  -5   2   9 5.84708 19.4753  33
   5  -2  -9 9.45699 15.5175  32
  -5   2   9 8.26871 19.1425  28
   5  -2  -8 86.1776 18.8305  36
   5  -2  -8 59.5298 16.7115  32
  -5   2   8 56.8874 19.7398  28
   5  -2  -7 38.9760 16.8129  36
  -5   2   7 41.3167 18.8100  28
   5  -2  -6 109.621 19.8252  36
  -5   2   6 73.6460 20.4062  28
   5  -2  -5 73.7091 18.1439  36
   5   2  -5 75.5676 18.4058  35
   5   2  -5 41.2378 21.9922  11
   5  -2  -5 66.3569 22.6992  10
  -5   2   5 106.385 19.8660  28
   5  -2  -4 137.293 20.9581  36
   5   2  -4 104.196 20.0187  35
   5  -2  -4 179.488 30.2454  13
  -5   2   4 120.432 20.3813  28
   5   2  -3 433.634 29.2536  35
   5  -2  -3 391.411 39.4379  13
  -5   2   3 404.577 28.8983  28
   5   2  -2 1733.96 67.5435  35
   5  -2  -2 1553.47 82.3246  13
  -5   2   2 1630.55 66.7335  28
   5   2  -1 134.966 22.1116  35
   5  -2  -1 109.847 27.2234  13
  -5   2   1 154.655 23.3264  30
  -5   2   1 142.717 19.4124  28
   5   2   0-4.88685 19.2563  35
  -5   2   0-11.1225 23.6802  23
   5  -2   0-19.8747 22.5885  13
  -5   2   0 16.6562 18.8133  30
  -5   2   0 13.2280 14.9412  28
   5   2   1 147.645 23.6760  35
  -5   2  -1 151.410 26.7647  23
  -5   2  -1 155.298 22.8599  30
   5   2   1 135.442 25.0534  39
  -5  -2  -2 1639.52 65.4593  38
   5   2   2 1570.36 66.9362  35
  -5   2  -2 1653.55 71.5786  23
  -5   2  -2 1498.19 83.0530  21
  -5   2  -2 1569.57 67.3501  30
   5   2   2 1675.87 70.5060  39
  -5  -2  -3 379.705 27.8369  38
   5   2   3 354.341 30.6544  35
  -5   2  -3 445.702 34.7193  23
  -5   2  -3 361.048 41.5418  21
  -5   2  -3 384.646 30.9392  30
   5  -2   3 496.688 47.4143  20
   5   2   3 445.048 34.7832  39
  -5  -2  -4 76.0127 17.9348  38
   5   2   4 95.5908 22.9969  35
  -5   2  -4 99.5292 24.5743  23
  -5   2  -4 52.0055 29.0779  21
   5  -2   4 116.963 33.1751  20
  -5   2  -4 90.2428 20.8552  30
   5   2   4 99.1092 25.5401  39
   5   2   5 86.4649 23.2294  35
  -5   2  -5 73.7894 24.1610  23
  -5  -2  -5 73.7314 18.1812  38
  -5   2  -5 58.3262 31.6002  21
   5  -2   5 74.5346 30.3835  20
   5   2   5 93.6358 25.0325  39
  -5  -2  -6 74.7970 18.4440  38
   5   2   6 50.0398 22.6250  35
  -5   2  -6 128.673 25.9072  23
  -5   2  -6 181.680 34.0013  21
   5  -2   6 106.309 32.2117  20
   5   2   6 127.736 27.5368  39
  -5  -2  -7 34.3529 17.2420  38
   5   2   7 25.1362 22.2077  35
  -5   2  -7 56.9872 22.8052  23
  -5  -2  -7 32.6162 18.2916  30
   5   2   7 16.0074 26.2458  39
  -5  -2  -8 89.7691 18.8249  38
   5   2   8 73.5639 23.1361  35
  -5   2  -8 94.5092 24.9111  23
   5   2   8 113.160 26.8093  39
  -5  -2  -9 6.87644 16.5149  38
  -5   2  -9 37.2119 21.8763  23
   5   2   9 18.5433 25.3119  39
  -5  -2 -10 111.230 19.2790  38
  -5   2 -10 101.296 24.5065  23
   5   2  10 116.832 28.0155  39
  -5  -2 -11 3.23781 15.6921  38
   5   2  11-24.5199 25.2196  39
  -5  -2 -12 27.2795 16.1970  38
   5   2  12 27.6592 24.1963  39
  -5  -2 -13-2.73935 13.6057  38
  -5   2 -13 14.5767 18.3126  23
   5   2  13 31.7473 21.9292  39
  -5   2 -14 170.387 21.2533  23
   5   2  14 138.155 24.2998  39
  -5   2 -15 83.1017 16.7427  23
   5   2  15 83.3833 20.5490  39
  -5   2 -16 117.196 16.1602  23
   5   2  16 102.367 18.2569  39
   5  -3 -15 15.1140 10.3246  36
   5   3 -15 22.7399 10.7386  34
   5  -3 -14 119.414 14.8021  36
   5   3 -14 105.431 15.2711  34
   5  -3 -13 184.781 18.0052  36
   5   3 -13 182.112 18.6248  34
   5  -3 -12 292.685 22.0254  36
   5   3 -12 304.590 22.9597  34
  -5   3  12 272.055 26.7185  33
   5  -3 -11 4.18920 14.8691  36
   5   3 -11 10.2598 14.9459  34
  -5   3  11 25.2550 19.2064  33
   5  -3 -10 75.9920 18.6319  36
   5   3 -10 52.1133 16.4057  34
  -5   3  10 80.7406 21.0516  33
   5  -3  -9 245.455 23.4452  36
   5   3  -9 225.428 22.0580  34
  -5   3   9 204.270 25.0743  33
   5  -3  -8 63.1115 18.5296  36
   5   3  -8 20.7436 15.6743  34
  -5   3   8 66.7362 20.5038  33
  -5   3   8 47.0588 19.2343  28
   5  -3  -7 41.3026 17.7090  36
   5   3  -7 38.2130 15.8483  34
  -5   3   7 28.2148 18.7665  33
  -5   3   7 25.1724 18.9140  28
   5  -3  -6 116.151 20.4076  36
   5   3  -6 91.8998 19.0922  35
   5   3  -6 122.380 18.4328  34
  -5   3   6 97.3461 21.0313  33
  -5   3   6 92.6686 21.1000  28
   5  -3  -5 525.328 33.9387  36
   5   3  -5 582.476 33.7124  35
  -5   3   5 601.346 35.9367  33
  -5   3   5 580.340 35.1656  28
   5  -3  -4 976.749 48.0263  36
   5   3  -4 1100.00 48.3648  35
  -5   3   4 1023.74 48.9015  33
  -5   3   4 1006.41 48.9970  28
   5   3  -3-1.61501 17.3260  35
  -5   3   3 11.9394 16.3247  28
   5   3  -2 152.390 22.0693  35
  -5   3   2 171.177 21.3589  28
   5   3  -1 111.096 21.1651  35
   5  -3  -1 114.933 29.0165  13
   5   3   0 10.0661 18.7181  35
   5  -3   0-4.29823 23.7505  13
   5   3   1 111.760 21.1931  35
   5  -3   1 168.775 33.0259  13
  -5   3  -1 89.8036 26.4842  23
   5   3   2 124.724 23.0442  35
  -5   3  -2 195.344 29.0120  23
   5   3   3-20.6136 20.8546  35
  -5   3  -3 16.4128 23.2184  23
   5   3   4 916.920 46.2140  35
  -5   3  -4 880.397 51.0351  23
  -5  -3  -5 579.093 35.2343  38
   5   3   5 563.001 36.8261  35
  -5   3  -5 594.040 40.1620  23
  -5  -3  -6 57.2247 17.9586  38
  -5   3  -6 106.709 25.2537  23
  -5  -3  -7 19.6510 17.0023  38
  -5   3  -7 29.1302 22.5951  23
  -5  -3  -8 65.3489 18.1666  38
  -5   3  -8 63.8021 22.8931  23
  -5  -3  -9 191.172 21.8019  38
  -5   3  -9 213.767 27.1252  23
  -5  -3 -10 47.8483 17.3150  38
  -5   3 -10 96.3480 22.7989  23
  -5  -3 -11 46.4136 16.0870  38
  -5   3 -11 32.7978 19.7086  23
  -5  -3 -12 259.386 21.8359  38
  -5   3 -12 297.820 26.5830  23
  -5  -3 -13 227.159 19.2614  38
  -5   3 -13 219.741 22.8470  23
  -5  -3 -14 95.8350 14.2007  38
  -5   3 -14 137.181 18.1727  23
  -5   3 -15 6.63893 12.4048  23
   5  -4 -13 15.7331 10.2897  36
   5   4 -13 8.91946 10.1214  34
   5  -4 -12 22.8017 11.8014  36
   5   4 -12 18.9856 11.9780  34
   5  -4 -11-3.29922 12.3853  36
   5   4 -11 10.7441 12.5762  34
   5  -4 -10 7.38930 13.2123  36
   5   4 -10-15.7230 13.1296  34
   5  -4  -9 175.426 19.3066  36
   5   4  -9 176.178 18.9636  34
   5  -4  -8 145.070 19.2832  36
   5   4  -8 133.222 18.5799  34
   5  -4  -7 331.908 25.1807  36
   5   4  -7 312.846 25.0768  34
  -5   4   7 312.487 27.6206  33
   5  -4  -6 493.189 31.4007  36
   5   4  -6 515.470 31.0254  34
  -5   4   6 465.550 32.0365  33
   5  -4  -5 36.7919 17.8628  36
   5   4  -5 22.7745 16.1722  34
  -5   4   5 8.71469 18.5194  33
   5  -4  -4 84.1588 19.6939  36
   5   4  -4 30.7525 17.8454  35
   5   4  -4 72.8620 18.4349  34
  -5   4   4 53.8158 18.1334  28
   5   4  -3 1938.54 73.3383  35
   5   4  -3 1763.70 72.7834  34
  -5   4   3 1857.18 73.0559  28
   5   4  -2 334.676 26.4236  35
   5   4  -2 315.639 26.3849  34
   5   4  -1 599.694 34.6897  35
   5   4   0 51.8720 18.4551  35
   5   4   1 613.974 34.9910  35
   5   4   2 289.109 25.6259  35
  -5   4  -3 1771.77 76.9147  23
  -5   4  -4 60.6507 23.7999  23
  -5   4  -5-2.18520 20.7792  23
  -5   4  -6 447.138 34.8063  23
  -5  -4  -7 364.809 26.9150  38
  -5   4  -7 348.594 30.4573  23
  -5  -4  -8 152.334 19.4813  38
  -5   4  -8 110.830 23.0757  23
  -5  -4  -9 164.559 19.6788  38
  -5   4  -9 184.784 23.4797  23
  -5  -4 -10 9.75284 13.3788  38
  -5   4 -10 3.38225 17.0947  23
  -5  -4 -11-3.79279 12.6334  38
  -5   4 -11 27.4933 16.1346  23
  -5  -4 -12-2.22317 11.9561  38
  -5   4 -12-9.36826 14.2845  23
  -5  -4 -13-0.93462 10.1027  38
  -5   4 -13 3.37150 12.7729  23
   5   5 -11 1.48392 8.75258  34
   5  -5 -10 110.485 12.4346  36
   5   5 -10 104.090 13.0749  34
   5  -5  -9 47.2014 12.1242  36
   5   5  -9 37.1569 11.9178  34
   5  -5  -8 422.132 23.4862  36
   5   5  -8 398.879 23.4902  34
   5  -5  -7 70.8055 15.0293  36
   5   5  -7 38.4950 13.1692  34
   5  -5  -6 25.6790 13.6502  36
   5   5  -6 5.13632 12.6086  34
   5  -5  -5 210.637 20.1255  36
   5   5  -5 200.226 19.1550  34
   5  -5  -4 27.6371 14.7963  36
   5   5  -4 9.87994 13.1686  34
   5  -5  -3 8.69154 15.4688  36
   5   5  -3 23.3173 14.5687  34
   5  -5  -2-16.4518 15.5479  36
   5   5  -2-1.49202 14.6435  34
   5   5  -1 27.2345 15.1841  34
   5   5   0 22.7810 15.0103  34
   5   5   1 13.6025 14.7463  34
   5   5   2 4.47083 14.2177  34
   5   5   3-2.90776 14.1359  34
   5   5   3 10.6022 17.0964  27
   5   5   4 25.3237 17.0633  27
   5   5   5 158.983 21.1783  27
   5   5   6 4.14394 15.9826  27
   5   5   7 58.3648 17.2508  27
   5   5   8 368.677 25.3099  27
  -5  -5  -9 27.1240 13.1810  30
   5   5   9 18.1953 13.7661  27
  -5  -5 -10 96.3765 12.8621  38
   5   5  10 100.328 14.9842  27
   5   6  -6 39.2415 9.54361  34
   5   6  -5 27.2379 9.18500  34
   5   6  -4 120.612 12.9849  34
   5   6  -3-1.82049 9.71498  34
   5  -6  -2 0.86518 10.2502  36
   5   6  -2 9.43602 10.2009  34
   5  -6  -1-4.54166 10.8499  36
   5   6  -1 2.89131 10.0988  34
   5  -6   0-6.52880 10.6734  36
   5   6   0-2.91103 10.4898  34
   5  -6   1 8.48431 11.4673  36
   5   6   1-0.96037 10.3553  34
   5   6   2 16.8037 10.5260  34
   5   6   3 5.35080 10.0909  34
   5   6   4 68.9375 11.3708  34
   5   6   5 12.0768 9.36919  34
  -5  -6  -6 29.0655 11.5479  30
   6   0 -15-0.80431 9.56766  32
   6   0 -14 134.196 14.6244  32
   6   0 -13 1.18473 12.2134  32
   6   0 -12 103.797 16.4071  32
   6   0 -11-8.62738 13.9393  32
   6   0 -10 247.125 22.1108  32
   6   0  -9 10.9584 14.7444  32
   6   0  -8 880.221 42.8805  32
   6   0  -7 4.77811 15.0471  32
   6   0  -6 1453.81 60.6459  32
   6   0  -5 6.26783 15.2369  32
  -6   0   5 9.69116 18.1306  28
   6   0  -4 751.696 38.1293  32
  -6   0   4 695.353 39.9607  28
  -6   0   3-1.84779 15.8302  28
  -6   0   2 39.6802 17.9555  28
  -6   0   1 17.2135 18.7684  30
  -6   0   1-8.81505 17.0880  28
  -6   0   0 212.789 25.5261  30
  -6   0   0 181.567 23.3617  28
  -6   0  -1-5.77471 19.2885  30
  -6   0  -1 15.3154 16.8011  28
  -6   0  -2 32.9761 19.0465  30
  -6   0  -2 11.7543 15.7728  28
   6   0   2 26.1116 22.8382  39
   6   0   3 22.2520 22.2431  35
  -6   0  -3-3.91354 19.6099  30
  -6   0  -3 36.5122 17.6705  28
   6   0   3-14.4990 23.4899  39
  -6   0  -4 834.162 45.2822  30
  -6   0  -4 826.844 41.3917  28
   6   0   4 828.452 48.1879  39
   6   0   5 26.1761 24.2832  39
  -6   0  -5 5.94006 18.9546  30
  -6   0  -6 1535.29 68.0630  30
   6   0   6 1676.84 72.6552  39
   6   0   7 8.99290 23.6851  39
   6   0   8 965.025 52.3308  39
   6   0   9 8.79963 23.9598  39
   6   0  10 301.643 31.6746  39
   6   0  11-4.05418 21.3544  39
   6   0  12 140.696 24.9454  39
   6   0  13 21.8003 19.4992  39
   6   0  15-6.61519 14.7556  35
   6  -1 -15 710.595 30.1266  31
   6  -1 -14 480.677 25.5436  32
   6  -1 -13 237.225 19.6827  32
   6  -1 -12 323.594 23.3204  32
   6   1 -12 348.096 23.0591  32
  -6   1  11 401.583 31.6546  33
   6  -1 -11 445.105 27.8565  32
   6   1 -11 430.334 26.3094  32
   6  -1 -10 171.651 19.8912  32
   6   1 -10 155.435 19.2893  32
   6  -1  -9 523.183 31.1046  32
   6   1  -9 511.708 30.6052  32
   6  -1  -8 57.0211 17.6870  32
   6   1  -8 32.8394 16.4862  32
   6  -1  -7 127.275 18.6159  32
   6   1  -7 75.1281 17.8528  32
  -6   1   7 101.830 21.9127  28
   6  -1  -6 119.246 18.5014  32
   6   1  -6 101.910 18.0359  32
  -6   1   6 114.451 21.9737  28
   6  -1  -5 531.245 30.3347  32
  -6   1   5 477.168 33.3128  28
  -6   1   4 558.588 35.9008  28
  -6   1   3 51.1678 18.9358  28
  -6  -1   3 34.0771 18.2235  28
  -6   1   2 407.151 31.4217  30
  -6   1   2 362.637 29.1377  28
  -6  -1   2 412.508 29.8368  28
  -6   1   1 801.039 44.6134  30
  -6   1   1 860.873 42.1065  28
  -6  -1   1 783.551 42.5519  28
   6   1   0 907.483 48.6303  35
  -6   1   0 926.014 49.4723  30
  -6  -1   0 1054.92 50.0327  30
  -6   1   0 1022.27 46.7885  28
   6   1   1 983.707 48.1540  35
  -6   1  -1 838.597 46.2918  30
  -6  -1  -1 881.936 46.5864  30
  -6   1  -1 925.160 44.4867  28
   6   1   2 379.899 32.5591  35
  -6   1  -2 376.011 32.3183  30
  -6  -1  -2 411.520 30.6987  30
  -6   1  -2 403.876 27.7043  28
   6   1   2 361.140 33.9059  39
   6   1   3 51.1061 24.2562  35
  -6   1  -3 79.2804 22.4902  30
  -6  -1  -3 56.4564 19.7674  30
   6   1   3 55.5690 26.3984  39
   6   1   4 648.276 41.2692  35
  -6   1  -4 705.892 41.4172  30
  -6  -1  -4 722.598 41.2116  30
   6   1   4 732.645 45.3401  39
  -6  -1  -5 543.806 33.0630  38
   6   1   5 408.270 35.1502  35
  -6   1  -5 535.691 36.0627  30
  -6  -1  -5 537.534 35.2783  30
   6   1   5 505.243 39.7866  39
  -6  -1  -6 125.618 19.9882  38
   6   1   6 126.398 25.2037  35
  -6   1  -6 147.050 23.5454  30
  -6  -1  -6 103.407 22.5280  30
   6   1   6 84.4076 26.7809  39
  -6  -1  -7 109.864 19.3417  38
   6   1   7 98.9137 23.9668  35
  -6  -1  -7 128.970 22.6672  30
   6   1   7 147.670 28.1224  39
  -6  -1  -8 10.2061 15.4935  38
   6   1   8 40.1182 22.7362  35
   6   1   8 34.9373 23.8886  39
  -6  -1  -9 534.505 31.7389  38
   6   1   9 556.292 39.6885  39
  -6  -1 -10 172.359 20.3587  38
   6   1  10 191.038 25.6454  35
   6   1  10 178.561 27.6211  39
   6   1  11 415.286 30.9842  35
   6   1  11 430.197 34.6400  39
   6   1  12 357.195 29.1458  35
   6   1  12 414.519 32.2511  39
   6   1  13 202.883 22.7167  35
   6   1  13 273.351 26.2384  39
   6   1  14 450.172 30.3713  39
   6   1  15 567.066 30.8583  39
   6  -2 -14 14.7617 10.4918  36
   6  -2 -13 70.8575 13.1941  36
   6  -2 -13 27.3200 11.7706  32
   6  -2 -12 27.8330 12.5847  36
  -6   2  12 22.4683 16.5017  33
   6  -2 -12 40.3456 13.1959  32
   6  -2 -11 29.7793 14.0838  36
  -6   2  11 11.4812 17.6657  33
   6  -2 -11 44.0834 14.0846  32
   6  -2 -10 29.7124 15.5838  36
  -6   2  10 31.2105 18.4802  33
   6  -2 -10 28.1357 13.8036  32
   6  -2  -9 26.0004 15.3024  36
  -6   2   9 26.8485 19.0324  33
   6  -2  -9 37.4864 14.9676  32
  -6   2   9 44.1796 18.5815  28
   6  -2  -8 305.324 24.2278  36
  -6   2   8 364.311 28.9991  33
   6   2  -8 355.801 24.6434  32
  -6   2   8 301.278 27.1301  28
   6   2  -7 1.51489 14.7313  32
  -6   2   7 19.2512 17.8871  28
   6   2  -6 638.106 33.5870  32
  -6   2   6 519.802 35.8243  28
  -6   2   5-1.89301 16.8538  28
   6   2  -4 67.1503 19.2430  35
  -6   2   4 57.5034 19.5843  28
   6   2  -3 332.935 27.5689  35
  -6   2   3 304.295 27.9471  28
   6   2  -2 344.094 28.4193  35
  -6   2   2 338.614 26.6844  28
   6   2  -1 1025.59 49.1992  35
  -6   2   1 959.550 47.3424  28
   6   2   0 30.3288 19.8807  35
  -6  -2   0 33.1716 19.8027  30
  -6   2   0 30.1683 16.7230  28
   6   2   1 959.678 49.3149  35
  -6  -2  -1 1010.78 49.8903  30
   6   2   2 418.102 32.3684  35
  -6  -2  -2 368.553 30.7086  30
  -6   2  -2 340.075 31.2555  30
   6   2   2 370.979 33.0057  39
  -6  -2  -3 219.003 25.2299  38
   6   2   3 237.379 27.4126  35
  -6   2  -3 250.848 27.4722  30
  -6  -2  -3 264.838 26.8075  30
   6   2   3 270.841 30.4838  39
  -6  -2  -4 61.1596 18.1472  38
   6   2   4 31.7541 21.7665  35
  -6   2  -4 60.7051 21.4007  30
  -6  -2  -4 57.2412 21.5568  30
   6   2   4 44.7392 23.6201  39
  -6  -2  -5 16.5800 16.6451  38
   6   2   5 3.73568 21.0368  35
  -6  -2  -5 5.89760 18.8767  30
   6   2   5 4.51131 23.9512  39
  -6  -2  -6 631.068 37.2297  38
   6   2   6 633.423 38.8885  35
  -6  -2  -6 653.695 39.2871  30
   6   2   6 688.011 44.1487  39
  -6  -2  -7 8.90154 16.2593  38
   6   2   7 17.9861 20.7673  35
  -6  -2  -7 5.63609 18.0407  30
   6   2   7 13.3622 22.7696  39
  -6  -2  -8 316.479 25.9866  38
   6   2   8 279.588 27.8684  35
  -6  -2  -8 298.680 26.8193  30
   6   2   8 324.132 31.7474  39
  -6  -2  -9 16.3523 16.3997  38
   6   2   9 9.97263 18.6873  35
   6   2   9 52.1822 22.7983  39
  -6  -2 -10 19.7827 15.3110  38
   6   2  10 38.5278 19.5972  35
   6   2  10 15.7379 21.4375  39
  -6  -2 -11 42.7979 14.7022  38
   6   2  11 65.3723 20.9754  39
  -6  -2 -12 25.4291 13.5888  38
   6   2  12 60.5198 19.8096  39
   6   2  13 55.7570 18.0831  39
   6   2  14 11.9653 14.6169  39
   6  -3 -13 20.5883 9.68172  36
   6  -3 -12 87.1076 13.3749  36
   6  -3 -11 39.1282 12.6323  36
  -6   3  11 60.3875 17.1127  33
   6  -3 -10 545.240 28.5274  36
  -6   3  10 508.936 30.9877  33
   6  -3  -9 626.413 31.9884  36
  -6   3   9 594.822 34.5612  33
   6  -3  -8 284.382 23.0827  36
  -6   3   8 244.506 24.5024  33
   6  -3  -7 1.44047 15.2153  36
  -6   3   7 8.40757 17.5259  33
  -6   3   7 6.87461 16.2903  28
   6  -3  -6 122.062 20.2751  36
  -6   3   6 168.048 23.2334  33
  -6   3   6 155.134 21.8428  28
   6  -3  -5 2220.95 82.0278  36
   6   3  -5 2034.75 80.3957  35
  -6   3   5 2104.03 83.0493  33
  -6   3   5 2230.12 83.8110  28
   6  -3  -4 738.716 38.5592  36
   6   3  -4 730.240 38.2480  35
  -6   3   4 673.545 38.2382  28
   6  -3  -3 793.364 41.6140  36
   6   3  -3 821.639 41.5889  35
  -6   3   3 854.675 42.3794  28
   6   3  -2 3237.79 112.210  35
  -6   3   2 3220.79 112.550  28
   6   3  -1 2991.83 111.469  35
  -6   3   1 3153.89 111.291  28
   6   3   0 5762.28 194.809  35
   6   3   1 3003.19 110.421  35
  -6  -3  -1 3020.64 112.337  30
   6   3   2 2735.77 104.272  35
  -6  -3  -2 2916.93 107.658  30
   6   3   3 773.505 42.1899  35
  -6  -3  -3 862.839 45.0401  30
   6   3   4 579.450 35.1859  35
  -6   3  -4 573.696 39.5706  23
  -6  -3  -4 541.605 36.1997  30
  -6  -3  -5 2212.64 82.0932  38
   6   3   5 1974.82 80.1443  35
  -6   3  -5 2011.22 85.5744  23
  -6  -3  -5 2077.79 83.1811  30
   6   3   5 2168.86 84.0365  39
  -6  -3  -6 134.215 20.8898  38
   6   3   6 151.467 22.4038  35
  -6   3  -6 143.395 25.3436  23
  -6  -3  -6 155.566 23.5917  30
   6   3   6 158.203 24.4923  39
  -6  -3  -7 24.9686 15.7832  38
   6   3   7 8.88225 17.0211  35
  -6   3  -7 12.0830 20.1246  23
  -6  -3  -7-1.76287 18.3785  30
   6   3   7 25.5343 19.1676  39
  -6  -3  -8 278.941 23.9450  38
  -6   3  -8 269.502 27.1294  23
  -6  -3  -8 255.744 25.2223  30
   6   3   8 293.461 26.3313  39
  -6  -3  -9 533.075 31.0913  38
  -6   3  -9 546.720 34.1969  23
   6   3   9 523.927 33.5946  39
  -6  -3 -10 402.985 26.0868  38
  -6   3 -10 419.368 29.0264  23
   6   3  10 414.822 28.3494  39
  -6  -3 -11 21.5893 12.7873  38
  -6   3 -11 24.2650 14.6906  23
  -6  -3 -12 25.6474 12.2996  38
  -6   3 -12 46.5878 14.8319  23
  -6   3 -13 6.02201 11.4604  23
   6  -4 -11 54.3487 10.3915  36
   6   4 -11 51.5311 10.5745  34
   6  -4 -10 11.8004 10.1373  36
   6   4 -10 13.0346 10.4506  34
   6  -4  -9 5.80358 11.1915  36
   6   4  -9-7.83448 11.1304  34
   6  -4  -8 1.08090 12.1727  36
   6  -4  -7 176.562 18.2310  36
   6  -4  -6 101.950 16.8405  36
   6  -4  -5 254.695 21.7387  36
   6  -4  -4 73.9018 17.2323  36
   6  -4  -3 125.391 19.4496  36
   6   4  -3 138.320 18.6294  35
   6  -4  -2 228.858 22.7007  36
   6   4  -2 211.398 20.8134  35
   6   4  -1 62.4518 17.2556  35
   6   4   0 70.8213 17.1982  35
   6   4   1 81.3204 17.2887  35
  -6  -4  -1 69.6391 19.3962  30
   6   4   2 169.859 19.8800  35
  -6  -4  -2 190.105 23.8831  30
   6   4   3 109.957 17.3976  35
  -6  -4  -3 126.166 21.4416  30
  -6  -4  -4 41.6841 18.5338  30
  -6  -4  -5 260.947 24.6419  30
  -6  -4  -6 87.1212 19.6812  30
  -6  -4  -7 194.241 21.9618  30
  -6  -4  -8 54.0764 13.5395  38
  -6   4  -8 32.8705 16.0192  23
  -6  -4  -8 8.00799 14.4623  30
  -6  -4  -9 13.1873 11.7305  38
  -6   4  -9-14.7997 14.3608  23
  -6  -4  -9 16.3452 13.4208  30
  -6  -4 -10 28.2559 11.4445  38
  -6   4 -10 17.6827 13.5395  23
  -6  -4 -11 62.9777 10.9132  38
   6  -5  -7 9.44539 9.39916  36
   6   5  -7-2.98161 8.49141  34
   6  -5  -6 321.707 18.4250  36
   6   5  -6 274.757 17.6050  34
   6  -5  -5 9.94814 10.5332  36
   6   5  -5-0.88111 9.57281  34
   6  -5  -4 224.028 17.7424  36
   6  -5  -3-2.06522 11.7362  36
   6  -5  -2 11.8722 12.4107  36
   6  -5  -1 61.2070 14.5945  36
   6  -5   0 72.4291 14.9865  36
   6  -5   1 56.8090 13.8497  36
  -6  -5  -2-5.07972 13.4845  30
  -6  -5  -3 8.83879 13.9568  30
  -6  -5  -4 204.859 19.4778  30
  -6  -5  -5 24.4347 13.3356  30
  -6  -5  -6 305.012 20.9371  30
  -6  -5  -7 2.88151 11.7992  30
   7   0 -13-0.72127 8.54429  32
   7   0 -12 18.6608 10.6081  32
   7   0 -11-6.20319 11.2051  32
   7   0 -10 550.237 28.7944  32
   7   0  -9 13.7868 12.7842  32
   7   0  -8 1.33359 13.1263  32
   7   0  -7 8.36416 13.5140  32
   7   0  -6 427.339 26.9053  32
   7   0  -5-5.83952 13.7024  32
  -7   0   5-9.19828 17.4948  28
   7   0  -4 262.491 22.3094  32
  -7   0   4 269.709 25.2233  28
   7   0  -3-1.47811 13.8255  32
  -7   0   3 7.45067 17.3638  28
   7   0  -2 405.186 27.4716  32
  -7   0   2 431.441 30.4099  28
  -7   0   1 2.03468 19.1596  30
  -7   0   1 10.9902 16.9024  28
  -7   0   0 14.3458 19.8647  30
  -7   0   0-18.0471 17.1062  28
  -7   0  -1-8.19429 19.5438  30
  -7   0  -1-3.54612 16.3609  28
  -7   0  -2 517.478 34.9439  30
  -7   0  -2 459.455 30.8950  28
  -7   0  -3 12.1839 18.9298  30
  -7   0  -3-3.37231 15.8243  28
  -7   0  -4 284.084 27.9184  30
  -7   0  -4 328.770 26.0242  28
   7   0   5 19.8448 21.6948  35
  -7   0  -5 27.3028 18.3173  30
   7   0   6 335.439 29.8012  35
  -7   0  -6 352.215 28.8873  30
   7   0   7 13.7809 19.9315  35
  -7   0  -7-1.76992 16.8308  30
   7   0   8 19.8671 19.7037  35
   7   0   9 18.6838 18.7212  35
   7   0  10 611.720 35.1648  35
   7   0  11 3.86049 16.6468  35
   7   0  12 46.0570 15.7720  35
   7   0  13 4.64960 13.1783  35
  -7   1  12 35.4368 13.8120  33
   7  -1 -12 36.0537 10.1563  32
   7   1 -12 34.6799 9.76222  32
  -7   1  11 1.25477 14.3579  33
   7  -1 -11-3.89131 10.5684  32
   7   1 -11 2.84409 10.3501  32
  -7   1  10 165.565 19.9457  33
   7  -1 -10 161.892 16.2109  32
   7   1 -10 159.538 16.1943  32
   7  -1  -9 158.679 16.7204  32
   7   1  -9 102.294 15.9386  32
   7  -1  -8 29.7864 12.7896  32
   7   1  -8 27.3693 12.8196  32
   7  -1  -7 45.0443 14.0733  32
   7   1  -7 72.0150 15.6020  32
  -7   1   7 72.5020 17.7679  28
   7   1  -6 44.9513 15.3818  32
  -7   1   6 8.75279 17.3575  28
   7   1  -5 28.5195 14.4754  32
  -7   1   5 16.0581 17.2004  28
   7   1  -4 6.15707 14.2549  32
  -7   1   4 14.3666 15.6925  28
  -7   1   3-3.58299 16.9271  28
  -7  -1   3-14.9256 16.9783  28
  -7   1   2 93.0766 21.6678  30
  -7   1   2 126.008 20.6644  28
  -7  -1   2 125.802 20.7581  28
  -7   1   1-10.2351 19.8412  30
  -7   1   1 1.74923 15.9165  28
  -7  -1   1 20.6100 17.6426  28
  -7   1   0-16.4860 19.5969  30
  -7  -1   0-10.0229 18.6878  30
  -7   1   0-1.71667 15.2285  28
  -7  -1   0-3.71779 17.0346  28
   7   1   1-17.2443 19.6001  35
  -7   1  -1 4.12473 18.8989  30
  -7  -1  -1-2.00994 19.2375  30
  -7   1  -1-15.1098 15.9140  28
  -7  -1  -1-1.83412 16.6305  28
   7   1   2 129.020 22.9382  35
  -7   1  -2 111.027 22.6718  30
  -7  -1  -2 124.362 23.0211  30
  -7   1  -2 89.7774 18.5548  28
  -7  -1  -2 131.424 20.9502  28
   7   1   3-14.2506 20.5253  35
  -7   1  -3 36.6542 20.7060  30
  -7  -1  -3 37.7806 21.4452  30
  -7  -1  -3 8.77909 16.7569  28
   7   1   4 16.0714 20.0737  35
  -7   1  -4 35.9780 19.0172  30
  -7  -1  -4 5.86497 18.8408  30
  -7  -1  -4 23.7861 16.3770  28
   7   1   5-8.86089 20.7282  35
  -7   1  -5 7.75060 18.4850  30
  -7  -1  -5-1.90157 18.1992  30
  -7  -1  -5 6.50870 15.6726  28
   7   1   5 6.07427 21.3295  39
   7   1   6 29.3345 19.7190  35
  -7   1  -6 31.4282 18.8657  30
  -7  -1  -6 41.9939 19.5552  30
  -7  -1  -6 23.0537 14.5918  28
   7   1   6 13.8500 20.4709  39
   7   1   7 97.8036 22.2483  35
  -7  -1  -7 65.2941 18.4105  30
   7   1   7 83.8167 21.7910  39
   7   1   8 26.6620 19.0987  35
   7  -1   8 49.8212 19.6237  35
   7   1   8 10.8261 19.6711  39
   7   1   9 192.406 22.3730  35
   7  -1   9 126.315 20.4441  35
   7   1   9 150.712 22.1441  39
   7   1  10 167.053 20.5486  35
   7  -1  10 119.472 20.1273  35
   7   1  10 123.041 20.0270  39
   7   1  11-2.34616 15.0413  35
   7  -1  11 1.22452 15.8126  35
   7   1  11-4.02074 15.1979  39
   7   1  12 21.8006 13.6078  35
   7  -1  12 46.8816 15.1650  35
   7   1  12 13.6815 14.4317  39
   7  -1  13 104.050 15.0428  35
  -7   2  11 19.1376 12.8691  33
  -7   2  10 33.8315 14.7054  33
  -7   2   9 1.31954 14.3000  33
   7   2  -9 7.04490 10.4619  32
  -7   2   8 46.2305 16.2990  33
   7   2  -8 31.6358 12.8809  32
  -7   2   8 56.9831 15.5714  28
  -7   2   7-5.83467 14.9239  33
   7   2  -7 33.4078 13.1508  32
  -7   2   7 27.3529 15.6334  28
  -7   2   6 4.47759 15.1329  33
   7   2  -6 17.2952 13.1386  32
  -7   2   6 7.92889 15.2774  28
  -7   2   5 42.1703 16.5596  33
   7   2  -5 32.4274 14.2925  32
  -7   2   5 32.4479 16.4350  28
  -7   2   4 713.997 37.9400  28
  -7   2   3 50.9888 16.3633  28
   7   2  -2 154.770 20.5821  35
  -7   2   2 138.836 19.7135  28
   7   2  -1 38.4587 18.1116  35
  -7   2   1 40.1942 16.3896  28
  -7  -2   1 39.9636 18.7147  28
   7   2   0-12.6927 17.4073  35
  -7  -2   0 1.92048 18.4395  30
  -7   2   0-9.44703 15.2139  28
  -7  -2   0 1.82507 17.4676  28
   7   2   1 58.3689 19.8105  35
  -7  -2  -1 32.8531 19.9712  30
  -7   2  -1 39.7229 15.5054  28
  -7  -2  -1 52.6395 19.1218  28
   7   2   2 131.071 21.5532  35
  -7  -2  -2 119.258 22.0762  30
  -7  -2  -2 110.931 20.3503  28
   7   2   3 34.4523 19.1255  35
  -7  -2  -3 20.8919 18.9943  30
   7   2   4 709.681 38.6737  35
  -7  -2  -4 654.998 38.5467  30
   7   2   5 31.5197 18.2778  35
  -7  -2  -5 50.1225 18.5475  30
   7   2   6 15.0994 17.6694  35
  -7  -2  -6 20.4351 17.4178  30
   7   2   7 1.42445 16.6619  35
  -7  -2  -7 15.8577 17.0990  30
   7   2   7-37.4434 19.5195  39
   7   2   8 34.5158 16.5798  35
  -7  -2  -8 31.6892 15.9013  30
   7   2   8 12.7039 17.9436  39
   7   2   9 25.0984 15.3031  35
   7   2   9 1.45037 16.4899  39
   7   2  10 56.7433 15.3525  35
   7   2  10 78.7675 16.7722  39
   7   2  11 12.2385 13.5388  39
  -7   3   9 37.1485 12.3628  33
  -7   3   8 19.8480 12.6606  33
  -7   3   7 384.768 24.5274  33
  -7   3   6 62.5578 15.3329  33
  -7   3   6 88.7449 15.6313  28
   7   3  -5 45.2056 13.2209  32
  -7   3   5 34.7188 14.2698  28
   7   3  -4 73.4894 15.6083  35
   7   3  -4 51.2274 13.8180  32
  -7   3   4 49.0480 15.4453  28
   7   3  -3 1178.22 49.8924  35
  -7   3   3 1241.48 51.2026  28
   7   3  -2 2.58078 14.1957  35
  -7   3   2 19.1722 13.8461  28
   7   3  -1 628.073 32.8981  35
  -7   3   1 598.495 32.2573  28
   7   3   0 63.7369 17.2506  35
   7   3   1 618.459 33.2156  35
  -7  -3  -1 579.308 35.7131  30
  -7  -3  -1 678.236 35.6349  28
   7   3   2 16.2485 15.2283  35
  -7  -3  -2 29.0702 17.5437  30
   7   3   3 1135.94 48.5649  35
  -7  -3  -3 1117.06 51.2570  30
   7   3   4 80.7863 16.9603  35
  -7  -3  -4 73.3768 18.6865  30
   7   3   5 69.3826 15.5977  35
  -7  -3  -5 24.8767 17.0005  30
   7   3   6 81.0729 16.0397  35
  -7  -3  -6 56.9214 16.8018  30
   7   3   7 417.583 24.2631  35
  -7  -3  -7 365.299 25.7612  30
  -7  -3  -8 22.4423 13.9509  30
   7  -4  -7 38.3459 9.37520  36
   7  -4  -6 3.72904 8.98226  36
   7  -4  -5 48.3495 11.5899  36
   7  -4  -4 54.5991 11.8089  36
   7  -4  -3 33.4237 11.3406  36
   7  -4  -2 16.4220 11.5498  36
   7  -4  -1 38.5764 12.7038  36
   7   4  -1 29.8082 12.2859  35
   7  -4   0 0.99322 11.8228  36
   7   4   0-27.0558 11.7851  35
   7   4   1 43.9141 12.5523  35
   7   4   2 14.7999 11.3709  35
  -7  -4  -2 12.8401 14.0593  30
   7   4   3 29.0770 11.2944  35
  -7  -4  -3 30.3855 14.1881  30
   7   4   4 24.5761 11.2204  35
  -7  -4  -4 25.6143 14.1337  30
  -7  -4  -5 47.1795 13.9900  30
  -7  -4  -6-2.10240 12.5823  30
  -7  -4  -7 29.6155 11.7315  30
  -8   0   9 5.60162 11.0598  33
   8   0  -9 0.72828 8.25873  32
   8   0  -8 24.7514 9.34425  32
   8   0  -7-6.32350 9.64327  32
   8   0  -6 28.0134 10.7102  32
   8   0  -5 4.05721 10.5427  32
  -8   0   5-5.18787 13.5902  28
   8   0  -4 24.0732 11.5710  32
  -8   0   4 34.2618 15.0602  28
  -8   0   3 26.9241 14.8322  28
  -8   0   2 714.155 35.9271  28
  -8   0   1 33.8958 17.1457  30
  -8   0   1 4.32524 14.6656  28
  -8   0   0 722.735 39.2955  30
  -8   0   0 787.318 37.6307  28
  -8   0  -1-11.5333 17.4055  30
  -8   0  -1 25.1024 13.8548  28
  -8   0  -2 556.727 34.4482  30
  -8   0  -2 676.632 32.9461  28
  -8   0  -3 1.58722 16.3630  30
  -8   0  -3 5.11408 12.5847  28
  -8   0  -4 56.3260 17.5554  30
  -8   0  -4 79.9437 14.5049  28
  -8   0  -5 10.0307 15.2968  30
  -8   0  -6 17.0642 14.8260  30
   8   0   7-8.32473 13.6489  35
  -8   0  -7 2.31948 12.9394  30
   8   0   8 22.7999 13.0814  35
   8   0   9 6.71398 11.6308  35
  -8   1   9 5.98954 11.1474  33
   8   1  -9 5.47367 8.02185  32
  -8   1   8 171.723 16.6178  33
   8   1  -8 174.208 14.4259  32
  -8   1   7 32.1097 13.0469  33
   8   1  -7 25.8005 10.7930  32
  -8   1   6 300.203 21.3910  33
   8   1  -6 336.414 20.2200  32
  -8   1   6 302.521 21.4519  28
  -8   1   5-1.11676 12.3228  33
   8   1  -5 21.7060 11.4345  32
  -8   1   5 32.0961 13.5204  28
   8   1  -4 46.5219 12.2890  32
  -8   1   4 41.3520 14.5502  28
   8   1  -3-11.1789 11.5252  32
  -8   1   3 13.2365 13.4181  28
  -8  -1   3-12.3010 13.4944  28
   8   1  -2 3.41824 11.4528  32
  -8   1   2 18.7301 13.3684  28
  -8  -1   2 1.41157 14.1460  28
   8   1  -1 1.14577 11.5147  32
  -8   1   1 8.00368 13.7139  28
  -8  -1   1 1.43210 14.3501  28
   8   1   0 71.6623 13.4850  32
  -8  -1   0 61.6179 17.2428  30
  -8   1   0 104.888 16.3249  28
  -8  -1   0 117.267 17.8360  28
  -8  -1  -1 25.3794 16.8897  30
  -8   1  -1 19.1041 13.2791  28
  -8  -1  -1-2.81576 14.0708  28
  -8  -1  -2-12.5688 16.7690  30
  -8   1  -2 26.7719 12.5811  28
  -8  -1  -2-2.73271 13.0782  28
   8   1   3-3.58702 14.2237  35
  -8  -1  -3 18.3826 15.9661  30
  -8  -1  -3 1.30624 12.8965  28
   8   1   4 14.1066 14.9354  35
  -8  -1  -4 20.5584 15.8167  30
  -8  -1  -4 44.1843 13.3942  28
   8   1   5 21.6947 14.6432  35
  -8  -1  -5-4.13953 14.6152  30
  -8  -1  -5 10.1603 12.2674  28
   8   1   6 315.084 21.8542  35
  -8  -1  -6 288.943 22.4355  30
  -8  -1  -6 298.774 19.8653  28
   8   1   7 28.9081 12.8786  35
  -8  -1  -7 26.9258 13.5929  30
   8   1   8 162.192 16.0196  35
   8   1   9 4.66026 10.6309  35
  -8   2   7 7.42359 10.4246  33
   8   2  -7 1.44491 8.34142  32
   8   2  -6 298.223 17.8015  32
  -8   2   6 314.363 19.4366  28
   8   2  -5 135.751 13.7396  32
  -8   2   5 118.034 14.8156  28
   8   2  -4 782.367 33.6716  32
  -8   2   4 774.812 34.9041  28
   8   2  -3 307.070 19.9258  32
  -8   2   3 295.171 20.8578  28
   8   2  -2 223.282 17.8906  32
  -8   2   2 217.772 18.6454  28
   8   2  -1 31.1548 11.6583  32
  -8   2   1 55.6096 12.9358  28
  -8  -2   1 43.9878 13.7507  28
   8   2   0 12.2277 12.6958  35
  -8   2   0 18.4661 12.2426  28
  -8  -2   0 16.6283 13.3039  28
   8   2   1 59.5406 14.0017  35
  -8  -2  -1 32.1421 16.2640  30
  -8  -2  -1 39.5654 14.2401  28
   8   2   2 237.953 19.2684  35
  -8  -2  -2 274.786 20.5779  28
   8   2   3 266.159 19.7109  35
  -8  -2  -3 235.974 22.1342  30
  -8  -2  -3 283.132 20.9470  28
   8   2   4 740.258 33.2248  35
  -8  -2  -4 667.053 34.8505  30
  -8  -2  -4 737.389 33.7607  28
   8   2   5 149.099 15.4805  35
  -8  -2  -5 100.104 16.1620  30
  -8  -2  -5 107.992 14.4183  28
   8   2   6 299.123 18.7637  35
  -8  -2  -6 252.516 20.2210  30
  -8  -2  -6 248.386 17.8765  28
   8   2   7-3.93629 10.1839  35
  -8  -2  -7 0.95439 11.9497  30
  -8  -2  -7 3.16878 9.71240  28
   8   3  -4 111.859 10.8924  32
   8   3  -3 19.8507 8.69454  32
   8   3  -2 351.404 19.0413  32
   8   3  -1 130.257 13.4123  35
   8   3  -1 122.581 12.7384  32
   8   3   0 172.940 14.4031  35
   8   3   1 158.277 14.0713  35
  -8  -3  -1 122.169 14.3720  28
   8   3   2 365.509 20.0711  35
  -8  -3  -2 316.849 22.2037  30
  -8  -3  -2 365.214 20.8369  28
   8   3   3 23.6944 10.1617  35
  -8  -3  -3 19.3747 12.5362  30
  -8  -3  -3 6.37444 10.2674  28
   8   3   4 107.866 12.0455  35
  -8  -3  -4 100.610 13.5420  30
  -8  -3  -4 93.4731 12.7851  28
   0   0   0    0.00    0.00   0

TITL UrAcDih_183K in P2(1)/c
REM P2(1)/c (#14 in standard setting)
CELL 1.54184   7.317539   6.356512  17.496222  90.0000  90.0101  90.0000
ZERR    4.00   0.000315   0.000284   0.000835   0.0000   0.0041   0.0000
LATT  1
SYMM -x, y+1/2,-z+1/2
SFAC C N O
UNIT 20.00 16.00 20.00
TREF
HKLF 4
END
;
_shelx_hkl_checksum                80928
_olex2_submission_special_instructions  'No special instructions were received'
_oxdiff_exptl_absorpt_empirical_details
;
Empirical correction (ABSPACK) includes:
- Absorption correction using spherical harmonics
- Frame scaling
;
_oxdiff_exptl_absorpt_empirical_full_max  1.843
_oxdiff_exptl_absorpt_empirical_full_min  0.745
loop_
  _twin_individual_id
  _twin_individual_mass_fraction_refined
 1 0.442(6)
 2 0.558(6)
