# Supplementary material
Source: MDPI journal article supplement (https://www.mdpi.com/2075-163X/9/6/373)
Supplement: s1 [file s1 › UAD_-130_last.cif]

data_UAD_-130_uracdih_143k
_audit_creation_date               2019-04-30
_audit_creation_method
;
Olex2 1.2
(compiled 2018.05.29 svn.r3508 for OlexSys, GUI svn.r5506)
;
_shelx_SHELXL_version_number       '2018/3'
_audit_contact_author_address      ?
_audit_contact_author_email        ?
_audit_contact_author_name         ''
_audit_contact_author_phone        ?
_publ_contact_author_id_orcid      ?
_publ_section_references
;
Dolomanov, O.V., Bourhis, L.J., Gildea, R.J, Howard, J.A.K. & Puschmann, H.
 (2009), J. Appl. Cryst. 42, 339-341.

Sheldrick, G.M. (2015). Acta Cryst. C71, 3-8.
;
_chemical_name_common              ?
_chemical_name_systematic          ?
_chemical_formula_moiety           'C5 H4 N4 O3, 2(H2 O)'
_chemical_formula_sum              'C5 H8 N4 O5'
_chemical_formula_weight           204.15
_chemical_melting_point            ?
_chemical_oxdiff_formula           'C5 N3 O5'
loop_
  _atom_type_symbol
  _atom_type_description
  _atom_type_scat_dispersion_real
  _atom_type_scat_dispersion_imag
  _atom_type_scat_source
 'C' 'C' 0.0181 0.0091 'International Tables Vol C Tables 4.2.6.8 and 6.1.1.4'
 'H' 'H' 0.0000 0.0000 'International Tables Vol C Tables 4.2.6.8 and 6.1.1.4'
 'N' 'N' 0.0311 0.0180 'International Tables Vol C Tables 4.2.6.8 and 6.1.1.4'
 'O' 'O' 0.0492 0.0322 'International Tables Vol C Tables 4.2.6.8 and 6.1.1.4'

_shelx_space_group_comment
;
The symmetry employed for this shelxl refinement is uniquely defined
by the following loop, which should always be used as a source of
symmetry information in preference to the above space-group names.
They are only intended as comments.
;
_space_group_crystal_system        'monoclinic'
_space_group_IT_number             14
_space_group_name_H-M_alt          'P 1 21/c 1'
_space_group_name_Hall             '-P 2ybc'
loop_
  _space_group_symop_operation_xyz
 'x, y, z'
 '-x, y+1/2, -z+1/2'
 '-x, -y, -z'
 'x, -y-1/2, z-1/2'

_cell_length_a                     7.2830(3)
_cell_length_b                     6.3616(3)
_cell_length_c                     17.4781(9)
_cell_angle_alpha                  90
_cell_angle_beta                   90.020(4)
_cell_angle_gamma                  90
_cell_volume                       809.79(7)
_cell_formula_units_Z              4
_cell_measurement_reflns_used      1321
_cell_measurement_temperature      143(2)
_cell_measurement_theta_max        69.7020
_cell_measurement_theta_min        5.0470
_shelx_estimated_absorpt_T_max     ?
_shelx_estimated_absorpt_T_min     ?
_exptl_absorpt_coefficient_mu      1.317
_exptl_absorpt_correction_T_max    1.00000
_exptl_absorpt_correction_T_min    0.60877
_exptl_absorpt_correction_type     multi-scan
_exptl_absorpt_process_details
;
CrysAlisPro 1.171.39.44a (Rigaku Oxford Diffraction, 2018)
Empirical absorption correction using spherical harmonics,
 implemented in SCALE3 ABSPACK scaling algorithm.
;
_exptl_absorpt_special_details     ?
_exptl_crystal_colour              'translucent colorless'
_exptl_crystal_density_diffrn      1.675
_exptl_crystal_density_meas        ?
_exptl_crystal_density_method      ?
_exptl_crystal_description         'prism'
_exptl_crystal_F_000               424
_exptl_crystal_size_max            0.077
_exptl_crystal_size_mid            0.058
_exptl_crystal_size_min            0.022
_exptl_transmission_factor_max     ?
_exptl_transmission_factor_min     ?
_diffrn_reflns_av_R_equivalents    0.0227
_diffrn_reflns_av_unetI/netI       0.0305
_diffrn_reflns_Laue_measured_fraction_full  0.997
_diffrn_reflns_Laue_measured_fraction_max  0.992
_diffrn_reflns_limit_h_max         8
_diffrn_reflns_limit_h_min         -8
_diffrn_reflns_limit_k_max         6
_diffrn_reflns_limit_k_min         -7
_diffrn_reflns_limit_l_max         20
_diffrn_reflns_limit_l_min         -21
_diffrn_reflns_number              4170
_diffrn_reflns_point_group_measured_fraction_full  0.997
_diffrn_reflns_point_group_measured_fraction_max  0.992
_diffrn_reflns_theta_full          67.684
_diffrn_reflns_theta_max           69.984
_diffrn_reflns_theta_min           2.528
_diffrn_ambient_environment        N~2~
_diffrn_ambient_temperature        143(2)
_diffrn_detector                   'CCD plate'
_diffrn_detector_area_resol_mean   ?
_diffrn_detector_type              HyPix3000
_diffrn_measured_fraction_theta_full  0.997
_diffrn_measured_fraction_theta_max  0.992
_diffrn_measurement_details
;
List of Runs (angles in degrees, time in seconds):

  # Type    Start    End  Width  t~exp~   \w     \q     \k     \f   Frames
--------------------------------------------------------------------------
  1  \w    -69.00 -22.00   0.50    3.00    --  -38.82 122.00  29.00   94
  2  \w    -94.00 -60.00   0.50    3.00    --  -38.82 151.00-169.00   68
  3  \w   -100.00 -71.00   0.50    3.00    --  -38.82-151.00 146.00   58
  4  \w     20.00  45.00   0.50    3.00    --   38.82-122.00 -52.00   50
  5  \w     64.00  90.00   0.50    3.00    --   38.82 151.00-169.00   52
  6  \w     37.00  62.00   0.50    3.00    --   38.82-151.00 146.00   50
  7  \w     91.00 124.00   0.50    6.00    --  100.00 151.00-169.00   66
  8  \w     68.00 108.00   0.50    6.00    --  100.00-122.00 -52.00   80
  9  \w    -55.00 -29.00   0.50    3.00    --  -38.82  54.00 -60.00   52
 10  \w    -15.00  11.00   0.50    3.00    --  -38.82 104.00 150.00   52
 11  \w    -73.00 -31.00   0.50    3.00    --  -38.82 104.00 150.00   84
 12  \w     -5.00  26.00   0.50    3.00    --  -38.82  54.00 -60.00   62
 13  \w     78.00 104.00   0.50    3.00    --   38.82  32.00  30.00   52
 14  \w    -24.00   5.00   0.50    3.00    --   38.82 -43.00 -60.00   58
 15  \w     20.00  45.00   0.50    3.00    --   38.82 -32.00  30.00   50
 16  \w     43.00  68.00   0.50    3.00    --   38.82-104.00 -30.00   50
 17  \w     24.00  81.00   0.50    3.00    --   38.82  54.00-120.00  114
 18  \w    -27.00  10.00   0.50    3.00    --   38.82 -32.00  30.00   74
 19  \w    -14.00  32.00   0.50    3.00    --   38.82-104.00 -30.00   92
 20  \w     37.00  74.00   0.50    3.00    --   38.82  32.00  30.00   74
 21  \w     21.00  50.00   0.50    3.00    --   38.82 -43.00 -60.00   58
 22  \w     24.00  51.00   0.50    6.00    --  100.00   0.00-180.00   54
 23  \w     96.00 125.00   0.50    6.00    --  100.00 -69.00-120.00   58
 24  \w    116.00 141.00   0.50    6.00    --  100.00  30.00 -90.00   50
 25  \w     89.00 156.00   0.50    6.00    --  100.00 133.00-180.00  134
 26  \w     34.00  80.00   0.50    6.00    --  100.00 -69.00-120.00   92
 27  \w    109.00 135.00   0.50    6.00    --  100.00 111.00-120.00   52
 28  \w     71.00 132.00   0.50    6.00    --  100.00  15.00-150.00  122
 29  \w     84.00 152.00   0.50    6.00    --  100.00  61.00-120.00  136
 30  \w     93.00 143.00   0.50    6.00    --  100.00  37.00 150.00  100
 31  \w     56.00 103.00   0.50    6.00    --  100.00 -61.00-180.00   94
 32  \w     36.00  90.00   0.50    6.00    --  100.00 -37.00 120.00  108
 33  \w     98.00 123.00   0.50    6.00    --  100.00  45.00-150.00   50
 34  \w     31.00 109.00   0.50    6.00    --  100.00 -86.00 120.00  156
 35  \w     71.00 128.00   0.50    6.00    --  100.00 133.00 -90.00  114
 36  \w     88.00 157.00   0.50    6.00    --  100.00  93.00   0.00  138
 37  \w     81.00 107.00   0.50    6.00    --  100.00 111.00-120.00   52
 38  \w     78.00 103.00   0.50    6.00    --  100.00   0.00-180.00   50
 39  \w     77.00 124.00   0.50    6.00    --  100.00  69.00 -60.00   94
;
_diffrn_measurement_device         'four-circle diffractometer'
_diffrn_measurement_device_type   
 'SuperNova, Single source at offset/far, HyPix3000'
_diffrn_measurement_method         '\w scans'
_diffrn_orient_matrix_type        
 'CrysAlisPro convention (1999,Acta A55,543-557)'
_diffrn_orient_matrix_UB_11        -0.2063923000
_diffrn_orient_matrix_UB_12        0.0519255000
_diffrn_orient_matrix_UB_13        0.0040067000
_diffrn_orient_matrix_UB_21        0.0394839000
_diffrn_orient_matrix_UB_22        0.1710985000
_diffrn_orient_matrix_UB_23        0.0601673000
_diffrn_orient_matrix_UB_31        0.0240637000
_diffrn_orient_matrix_UB_32        0.1634009000
_diffrn_orient_matrix_UB_33        -0.0642721000
_diffrn_radiation_monochromator    mirror
_diffrn_radiation_probe            x-ray
_diffrn_radiation_type             CuK\a
_diffrn_radiation_wavelength       1.54184
_diffrn_source                     'micro-focus sealed X-ray tube'
_diffrn_source_type                'SuperNova (Cu) X-ray Source'
_reflns_Friedel_coverage           0.000
_reflns_Friedel_fraction_full      .
_reflns_Friedel_fraction_max       .
_reflns_number_gt                  1241
_reflns_number_total               1524
_reflns_odcompleteness_completeness  98.36
_reflns_odcompleteness_iscentric   1
_reflns_odcompleteness_theta       70.93
_reflns_special_details
;
 Reflections were merged by SHELXL according to the crystal
 class for the calculation of statistics and refinement.
 
 _reflns_Friedel_fraction is defined as the number of unique
 Friedel pairs measured divided by the number that would be
 possible theoretically, ignoring centric projections and
 systematic absences. Completness statistics refer to single and
 composite reflections containing twin component 1 only.
;
_reflns_threshold_expression       'I > 2\s(I)'
_computing_cell_refinement         'CrysAlisPro 1.171.39.44a (Rigaku OD, 2018)'
_computing_data_collection         'CrysAlisPro 1.171.39.44a (Rigaku OD, 2018)'
_computing_data_reduction          'CrysAlisPro 1.171.39.44a (Rigaku OD, 2018)'
_computing_molecular_graphics      'Olex2 (Dolomanov et al., 2009)'
_computing_publication_material    'Olex2 (Dolomanov et al., 2009)'
_computing_structure_refinement    'ShelXL (Sheldrick, 2015)'
_computing_structure_solution      'ShelXT (Sheldrick, 2015)'
_refine_diff_density_max           0.324
_refine_diff_density_min           -0.222
_refine_diff_density_rms           0.057
_refine_ls_extinction_coef         0.0018(2)
_refine_ls_extinction_expression  
 'Fc^*^=kFc[1+0.001xFc^2^\l^3^/sin(2\q)]^-1/4^'
_refine_ls_extinction_method       'SHELXL-2018/3 (Sheldrick 2018)'
_refine_ls_goodness_of_fit_ref     1.058
_refine_ls_hydrogen_treatment      mixed
_refine_ls_matrix_type             full
_refine_ls_number_parameters       165
_refine_ls_number_reflns           1524
_refine_ls_number_restraints       5
_refine_ls_R_factor_all            0.0564
_refine_ls_R_factor_gt             0.0456
_refine_ls_restrained_S_all        1.057
_refine_ls_shift/su_max            0.000
_refine_ls_shift/su_mean           0.000
_refine_ls_structure_factor_coef   Fsqd
_refine_ls_weighting_details      
 'w=1/[\s^2^(Fo^2^)+(0.0709P)^2^+0.1342P] where P=(Fo^2^+2Fc^2^)/3'
_refine_ls_weighting_scheme        calc
_refine_ls_wR_factor_gt            0.1185
_refine_ls_wR_factor_ref           0.1260
_refine_special_details
;
 Refined as a 2-component twin.
;
_olex2_refinement_description
;
1. Twinned data refinement
 Scales: 0.447(6)
 0.553(6)
2. Fixed Uiso
 At 1.2 times of:
  All N(H) groups
 At 1.5 times of:
  All O(H,H) groups
3. Restrained distances
 OW2-HW2A
 0.95 with sigma of 0.02
 OW1-HW1B = OW1-HW1A
 0.95 with sigma of 0.02
 OW2-HW2B
 0.95 with sigma of 0.02
 HW2B-H4A
 2.15 with sigma of 0.02
4. Uiso/Uaniso restraints and constraints
Uanis(C1A) = Uanis(C1B)
Uanis(C2A) = Uanis(C2B) = Uanis(C3A) = Uanis(C3B)
Uanis(C4A) = Uanis(C4B)
Uanis(C5A) = Uanis(C5B)
Uanis(N1A) = Uanis(N1B) = Uanis(N3A) = Uanis(N3B)
Uanis(N2A) = Uanis(N2B)
Uanis(N4A) = Uanis(N4B)
Uanis(O1A) = Uanis(O1B)
Uanis(O2A) = Uanis(O2B)
Uanis(O3A) = Uanis(O3B)
5. Others
 Fixed Sof: C1A(0.58495) C2A(0.58495) C3A(0.58495) C4A(0.58495) C5A(0.58495)
 N1A(0.58495) H1A(0.58495) N2A(0.58495) H2A(0.58495) N3A(0.58495) H3A(0.58495)
 N4A(0.58495) H4A(0.58495) O1A(0.58495) O2A(0.58495) O3A(0.58495) C1B(0.41505)
 C2B(0.41505) C3B(0.41505) C4B(0.41505) C5B(0.41505) N1B(0.41505) H1B(0.41505)
 N2B(0.41505) H2B(0.41505) N3B(0.41505) H3B(0.41505) N4B(0.41505) H4B(0.41505)
 O1B(0.41505) O2B(0.41505) O3B(0.41505)
6.a Aromatic/amide H refined with riding coordinates:
 N1A(H1A), N2A(H2A), N3A(H3A), N4A(H4A), N1B(H1B), N2B(H2B), N3B(H3B), N4B(H4B)
;
_atom_sites_solution_hydrogens     mixed
_atom_sites_solution_primary       ?
_atom_sites_solution_secondary     ?
loop_
  _atom_site_label
  _atom_site_type_symbol
  _atom_site_fract_x
  _atom_site_fract_y
  _atom_site_fract_z
  _atom_site_U_iso_or_equiv
  _atom_site_adp_type
  _atom_site_occupancy
  _atom_site_site_symmetry_order
  _atom_site_calc_flag
  _atom_site_refinement_flags_posn
  _atom_site_refinement_flags_adp
  _atom_site_refinement_flags_occupancy
  _atom_site_disorder_assembly
  _atom_site_disorder_group
 C1A C -0.1095(13) -0.2067(17) -0.4267(6) 0.0288(13) Uani 0.5849 1 d . . P A 1
 C2A C -0.2634(8) -0.5299(7) -0.4006(7) 0.0268(4) Uani 0.5849 1 d . . P A 1
 C3A C -0.2846(8) -0.5719(7) -0.4760(3) 0.0268(4) Uani 0.5849 1 d . . P A 1
 C4A C -0.2212(8) -0.4295(8) -0.5335(3) 0.0270(5) Uani 0.5849 1 d . . P A 1
 C5A C -0.4064(12) -0.8374(14) -0.4093(6) 0.0302(11) Uani 0.5849 1 d . . P A 1
 N1A N -0.1375(13) -0.2527(13) -0.5013(4) 0.0281(12) Uani 0.5849 1 d . . P A 1
 H1A H -0.098532 -0.160400 -0.533390 0.034 Uiso 0.5849 1 calc R . P A 1
 N2A N -0.1776(12) -0.3504(14) -0.3748(5) 0.0314(10) Uani 0.5849 1 d . . P A 1
 H2A H -0.166567 -0.327919 -0.326469 0.038 Uiso 0.5849 1 calc R . P A 1
 N3A N -0.3755(12) -0.7606(12) -0.4817(5) 0.0281(12) Uani 0.5849 1 d . . P A 1
 H3A H -0.407793 -0.820727 -0.523644 0.034 Uiso 0.5849 1 calc R . P A 1
 N4A N -0.3350(11) -0.6873(11) -0.3586(4) 0.0284(10) Uani 0.5849 1 d . . P A 1
 H4A H -0.336670 -0.694479 -0.309500 0.034 Uiso 0.5849 1 calc DR . P A 1
 O1A O -0.0279(11) -0.0500(13) -0.4042(6) 0.0376(11) Uani 0.5849 1 d . . P A 1
 O2A O -0.2331(7) -0.4491(6) -0.6033(3) 0.0344(6) Uani 0.5849 1 d . . P A 1
 O3A O -0.4884(11) -0.9976(16) -0.3927(6) 0.0414(11) Uani 0.5849 1 d . . P A 1
 C1B C -0.3891(19) -0.792(2) -0.4267(9) 0.0288(13) Uani 0.415 1 d . . P B 2
 C2B C -0.2376(13) -0.4778(12) -0.4010(10) 0.0268(4) Uani 0.415 1 d . . P B 2
 C3B C -0.2168(11) -0.4327(10) -0.4781(4) 0.0268(4) Uani 0.415 1 d . . P B 2
 C4B C -0.2785(11) -0.5658(11) -0.5334(4) 0.0270(5) Uani 0.415 1 d . . P B 2
 C5B C -0.089(2) -0.176(3) -0.4096(11) 0.0302(11) Uani 0.415 1 d . . P B 2
 N1B N -0.359(2) -0.7474(19) -0.5018(7) 0.0281(12) Uani 0.415 1 d . . P B 2
 H1B H -0.393840 -0.841764 -0.533972 0.034 Uiso 0.415 1 calc R . P B 2
 N2B N -0.3241(17) -0.6521(17) -0.3762(7) 0.0314(10) Uani 0.415 1 d . . P B 2
 H2B H -0.337602 -0.673659 -0.327984 0.038 Uiso 0.415 1 calc R . P B 2
 N3B N -0.1264(19) -0.2360(18) -0.4809(8) 0.0281(12) Uani 0.415 1 d . . P B 2
 H3B H -0.099811 -0.166882 -0.521711 0.034 Uiso 0.415 1 calc R . P B 2
 N4B N -0.1615(19) -0.325(2) -0.3590(8) 0.0284(10) Uani 0.415 1 d . . P B 2
 H4B H -0.157542 -0.319626 -0.309876 0.034 Uiso 0.415 1 calc R . P B 2
 O1B O -0.4714(17) -0.960(2) -0.4056(8) 0.0376(11) Uani 0.415 1 d . . P B 2
 O2B O -0.2686(9) -0.5433(8) -0.6036(5) 0.0344(6) Uani 0.415 1 d . . P B 2
 O3B O -0.0092(19) -0.007(2) -0.3923(9) 0.0414(11) Uani 0.415 1 d . . P B 2
 OW1 O 0.0898(5) 0.2279(5) -0.27955(17) 0.0708(10) Uani 1 1 d D . . . .
 HW1A H 0.079(7) 0.127(6) -0.319(2) 0.106 Uiso 1 1 d DR . . . .
 HW1B H 0.190(5) 0.287(7) -0.303(3) 0.106 Uiso 1 1 d DR . . . .
 OW2 O -0.4047(6) -0.7480(5) -0.21708(17) 0.0742(11) Uani 1 1 d D . . . .
 HW2A H -0.356(7) -0.814(7) -0.172(2) 0.111 Uiso 1 1 d DR . . . .
 HW2B H -0.476(6) -0.629(5) -0.2045(17) 0.111 Uiso 1 1 d DR . . . .

loop_
  _atom_site_aniso_label
  _atom_site_aniso_U_11
  _atom_site_aniso_U_22
  _atom_site_aniso_U_33
  _atom_site_aniso_U_23
  _atom_site_aniso_U_13
  _atom_site_aniso_U_12
 C1A 0.032(2) 0.024(3) 0.030(6) -0.002(2) 0.001(3) -0.0009(18)
 C2A 0.0278(10) 0.0210(11) 0.0315(9) 0.004(2) 0.0006(19) 0.0002(8)
 C3A 0.0278(10) 0.0210(11) 0.0315(9) 0.004(2) 0.0006(19) 0.0002(8)
 C4A 0.0257(11) 0.0226(12) 0.0328(12) -0.002(2) -0.003(2) 0.0011(10)
 C5A 0.031(2) 0.034(4) 0.025(4) 0.000(3) -0.007(3) 0.004(2)
 N1A 0.0330(8) 0.0223(8) 0.029(4) -0.0005(17) 0.002(2) -0.0042(6)
 N2A 0.0398(18) 0.034(2) 0.021(3) -0.001(2) -0.002(3) 0.0015(16)
 N3A 0.0330(8) 0.0223(8) 0.029(4) -0.0005(17) 0.002(2) -0.0042(6)
 N4A 0.0369(17) 0.027(2) 0.021(3) 0.0035(19) -0.004(2) -0.0023(13)
 O1A 0.0415(18) 0.036(4) 0.035(3) 0.003(3) 0.001(3) -0.008(2)
 O2A 0.0440(14) 0.0313(17) 0.0278(8) 0.003(3) 0.000(2) -0.0058(14)
 O3A 0.052(2) 0.032(3) 0.039(3) 0.0082(16) 0.000(3) -0.007(2)
 C1B 0.032(2) 0.024(3) 0.030(6) -0.002(2) 0.001(3) -0.0009(18)
 C2B 0.0278(10) 0.0210(11) 0.0315(9) 0.004(2) 0.0006(19) 0.0002(8)
 C3B 0.0278(10) 0.0210(11) 0.0315(9) 0.004(2) 0.0006(19) 0.0002(8)
 C4B 0.0257(11) 0.0226(12) 0.0328(12) -0.002(2) -0.003(2) 0.0011(10)
 C5B 0.031(2) 0.034(4) 0.025(4) 0.000(3) -0.007(3) 0.004(2)
 N1B 0.0330(8) 0.0223(8) 0.029(4) -0.0005(17) 0.002(2) -0.0042(6)
 N2B 0.0398(18) 0.034(2) 0.021(3) -0.001(2) -0.002(3) 0.0015(16)
 N3B 0.0330(8) 0.0223(8) 0.029(4) -0.0005(17) 0.002(2) -0.0042(6)
 N4B 0.0369(17) 0.027(2) 0.021(3) 0.0035(19) -0.004(2) -0.0023(13)
 O1B 0.0415(18) 0.036(4) 0.035(3) 0.003(3) 0.001(3) -0.008(2)
 O2B 0.0440(14) 0.0313(17) 0.0278(8) 0.003(3) 0.000(2) -0.0058(14)
 O3B 0.052(2) 0.032(3) 0.039(3) 0.0082(16) 0.000(3) -0.007(2)
 OW1 0.074(2) 0.085(2) 0.0536(15) -0.0027(14) -0.0030(18) -0.0026(18)
 OW2 0.088(3) 0.084(2) 0.0513(15) -0.0121(14) 0.0071(19) 0.0084(19)

_geom_special_details
;
 All esds (except the esd in the dihedral angle between two l.s. planes)
 are estimated using the full covariance matrix.  The cell esds are taken
 into account individually in the estimation of esds in distances, angles
 and torsion angles; correlations between esds in cell parameters are only
 used when they are defined by crystal symmetry.  An approximate (isotropic)
 treatment of cell esds is used for estimating esds involving l.s. planes.
;
loop_
  _geom_bond_atom_site_label_1
  _geom_bond_atom_site_label_2
  _geom_bond_distance
  _geom_bond_site_symmetry_2
  _geom_bond_publ_flag
 C1A N1A 1.352(9) . ?
 C1A N2A 1.38(2) . ?
 C1A O1A 1.225(11) . ?
 C2A C3A 1.354(13) . ?
 C2A N2A 1.377(9) . ?
 C2A N4A 1.346(9) . ?
 C3A C4A 1.430(7) . ?
 C3A N3A 1.374(9) . ?
 C4A N1A 1.397(8) . ?
 C4A O2A 1.230(8) . ?
 C5A N3A 1.375(9) . ?
 C5A N4A 1.402(16) . ?
 C5A O3A 1.217(12) . ?
 C1B N1B 1.361(14) . ?
 C1B N2B 1.34(2) . ?
 C1B O1B 1.282(16) . ?
 C2B C3B 1.386(18) . ?
 C2B N2B 1.347(13) . ?
 C2B N4B 1.337(14) . ?
 C3B C4B 1.361(10) . ?
 C3B N3B 1.415(13) . ?
 C4B N1B 1.409(12) . ?
 C4B O2B 1.238(11) . ?
 C5B N3B 1.330(14) . ?
 C5B N4B 1.40(3) . ?
 C5B O3B 1.258(17) . ?

loop_
  _geom_angle_atom_site_label_1
  _geom_angle_atom_site_label_2
  _geom_angle_atom_site_label_3
  _geom_angle
  _geom_angle_site_symmetry_1
  _geom_angle_site_symmetry_3
  _geom_angle_publ_flag
 N1A C1A N2A 115.9(8) . . ?
 O1A C1A N1A 124.0(12) . . ?
 O1A C1A N2A 120.1(9) . . ?
 C3A C2A N2A 122.3(8) . . ?
 N4A C2A C3A 109.8(6) . . ?
 N4A C2A N2A 127.9(9) . . ?
 C2A C3A C4A 121.5(5) . . ?
 C2A C3A N3A 107.3(6) . . ?
 N3A C3A C4A 131.1(6) . . ?
 N1A C4A C3A 111.6(5) . . ?
 O2A C4A C3A 127.7(5) . . ?
 O2A C4A N1A 120.8(6) . . ?
 N3A C5A N4A 106.2(7) . . ?
 O3A C5A N3A 126.7(11) . . ?
 O3A C5A N4A 127.0(9) . . ?
 C1A N1A C4A 128.9(8) . . ?
 C2A N2A C1A 119.8(8) . . ?
 C3A N3A C5A 108.8(8) . . ?
 C2A N4A C5A 107.8(7) . . ?
 N2B C1B N1B 116.2(11) . . ?
 O1B C1B N1B 121.7(16) . . ?
 O1B C1B N2B 122.1(14) . . ?
 N2B C2B C3B 122.3(12) . . ?
 N4B C2B C3B 109.8(10) . . ?
 N4B C2B N2B 128.0(14) . . ?
 C2B C3B N3B 105.5(8) . . ?
 C4B C3B C2B 121.7(7) . . ?
 C4B C3B N3B 132.8(8) . . ?
 C3B C4B N1B 111.7(8) . . ?
 O2B C4B C3B 127.8(7) . . ?
 O2B C4B N1B 120.5(9) . . ?
 N3B C5B N4B 108.8(13) . . ?
 O3B C5B N3B 124(2) . . ?
 O3B C5B N4B 126.9(16) . . ?
 C1B N1B C4B 128.0(12) . . ?
 C1B N2B C2B 120.0(11) . . ?
 C5B N3B C3B 108.4(12) . . ?
 C2B N4B C5B 107.5(11) . . ?

loop_
  _geom_hbond_atom_site_label_D
  _geom_hbond_atom_site_label_H
  _geom_hbond_atom_site_label_A
  _geom_hbond_distance_DH
  _geom_hbond_distance_HA
  _geom_hbond_distance_DA
  _geom_hbond_angle_DHA
  _geom_hbond_site_symmetry_A
  _geom_hbond_publ_flag
 N1A H1A O1A 0.86 1.96 2.808(16) 170.3 3_554 yes
 N2A H2A OW1 0.86 1.97 2.816(8) 168.8 2_544 yes
 N3A H3A O3A 0.86 2.01 2.858(18) 168.1 3_434 yes
 N4A H4A OW2 0.86 1.72 2.555(7) 161.9 . yes
 N1B H1B O1B 0.86 1.91 2.76(2) 165.9 3_434 yes
 N2B H2B OW2 0.86 2.05 2.908(10) 171.5 . yes
 N3B H3B O3B 0.86 2.03 2.88(3) 169.0 3_554 yes
 N4B H4B OW1 0.86 1.67 2.500(12) 162.5 2_544 yes
 OW1 HW1A O1A 0.95(2) 2.02(3) 2.934(6) 161(4) . yes
 OW1 HW1A O3B 0.95(2) 1.67(3) 2.578(9) 160(5) . yes
 OW1 HW1B O2A 0.92(2) 1.95(4) 2.694(6) 136(4) 3_554 yes
 OW1 HW1B O2B 0.92(2) 2.37(3) 3.145(8) 142(4) 3_554 yes
 OW2 HW2A O2A 0.96(2) 2.12(3) 3.038(6) 158(4) 4_546 yes
 OW2 HW2A O2B 0.96(2) 1.63(2) 2.584(8) 171(5) 4_546 yes
 OW2 HW2B O3A 0.947(19) 1.91(3) 2.612(6) 129(3) 2_454 yes
 OW2 HW2B O1B 0.947(19) 2.24(3) 2.960(9) 133(3) 2_454 yes

loop_
  _geom_torsion_atom_site_label_1
  _geom_torsion_atom_site_label_2
  _geom_torsion_atom_site_label_3
  _geom_torsion_atom_site_label_4
  _geom_torsion
  _geom_torsion_site_symmetry_1
  _geom_torsion_site_symmetry_2
  _geom_torsion_site_symmetry_3
  _geom_torsion_site_symmetry_4
  _geom_torsion_publ_flag
 C2A C3A C4A N1A 0.6(9) . . . . ?
 C2A C3A C4A O2A -179.6(6) . . . . ?
 C2A C3A N3A C5A -1.4(9) . . . . ?
 C3A C2A N2A C1A -0.2(11) . . . . ?
 C3A C2A N4A C5A -0.2(8) . . . . ?
 C3A C4A N1A C1A 1.1(13) . . . . ?
 C4A C3A N3A C5A -180.0(6) . . . . ?
 N1A C1A N2A C2A 1.7(12) . . . . ?
 N2A C1A N1A C4A -2.3(15) . . . . ?
 N2A C2A C3A C4A -1.0(9) . . . . ?
 N2A C2A C3A N3A -179.7(7) . . . . ?
 N2A C2A N4A C5A -179.5(8) . . . . ?
 N3A C3A C4A N1A 179.0(6) . . . . ?
 N3A C3A C4A O2A -1.3(11) . . . . ?
 N3A C5A N4A C2A -0.7(9) . . . . ?
 N4A C2A C3A C4A 179.7(5) . . . . ?
 N4A C2A C3A N3A 1.0(8) . . . . ?
 N4A C2A N2A C1A 178.9(8) . . . . ?
 N4A C5A N3A C3A 1.3(9) . . . . ?
 O1A C1A N1A C4A 177.1(9) . . . . ?
 O1A C1A N2A C2A -177.7(8) . . . . ?
 O2A C4A N1A C1A -178.7(8) . . . . ?
 O3A C5A N3A C3A 177.5(8) . . . . ?
 O3A C5A N4A C2A -176.9(8) . . . . ?
 C2B C3B C4B N1B -1.0(12) . . . . ?
 C2B C3B C4B O2B 179.8(9) . . . . ?
 C2B C3B N3B C5B 2.8(13) . . . . ?
 C3B C2B N2B C1B 1.8(16) . . . . ?
 C3B C2B N4B C5B 0.1(13) . . . . ?
 C3B C4B N1B C1B 4.3(19) . . . . ?
 C4B C3B N3B C5B -177.4(10) . . . . ?
 N1B C1B N2B C2B 1.1(17) . . . . ?
 N2B C1B N1B C4B -4(2) . . . . ?
 N2B C2B C3B C4B -1.9(14) . . . . ?
 N2B C2B C3B N3B 177.9(11) . . . . ?
 N2B C2B N4B C5B -179.5(12) . . . . ?
 N3B C3B C4B N1B 179.3(8) . . . . ?
 N3B C3B C4B O2B 0.1(16) . . . . ?
 N3B C5B N4B C2B 1.7(15) . . . . ?
 N4B C2B C3B C4B 178.4(8) . . . . ?
 N4B C2B C3B N3B -1.8(12) . . . . ?
 N4B C2B N2B C1B -178.5(12) . . . . ?
 N4B C5B N3B C3B -2.8(15) . . . . ?
 O1B C1B N1B C4B 177.0(12) . . . . ?
 O1B C1B N2B C2B 179.6(11) . . . . ?
 O2B C4B N1B C1B -176.4(12) . . . . ?
 O3B C5B N3B C3B 180.0(12) . . . . ?
 O3B C5B N4B C2B 178.8(12) . . . . ?


_shelx_res_file
;
TITL UrAcDih_143K in P2(1)/c
    uracdih_143k.res
    created by SHELXL-2018/3 at 00:43:59 on 30-Apr-2019
REM transformed to space group :
REM P2(1)/c (#14 in standard setting)
CELL 1.54184 7.283 6.3616 17.4781 90 90.0204 90
ZERR 4 0.0003 0.0003 0.0009 0 0.0042 0
LATT 1
SYMM -X,0.5+Y,0.5-Z
SFAC C H N O
UNIT 20 32 16 20
DFIX 0.95 OW2 HW2a
DFIX 0.95 OW1 HW1b OW1 HW1a
DFIX 0.95 OW2 HW2b
DFIX 2.15 HW2b H4A
EADP C1A C1B
EADP C2A C2B C3A C3B
EADP C4A C4B
EADP C5A C5B
EADP N1A N1B N3A N3B
EADP N2A N2B
EADP N4A N4B
EADP O1A O1B
EADP O2A O2B
EADP O3A O3B

L.S. 20
PLAN  20
BOND
list 4
fmap 2 53
acta
TWIN -1 0 0 0 -1 0 0 0 1 2
OMIT -4 140
OMIT 0 -2 5
OMIT 6 -1 14
OMIT -1 -1 0
OMIT 6 -1 13
REM <olex2.extras>
REM <HklSrc "%.\\UrAcDih_143K.hkl">
REM </olex2.extras>

WGHT    0.070900    0.134200
EXTI    0.001801
BASF   0.55337
FVAR       2.85824
PART 1
C1A   1   -0.109476   -0.206706   -0.426734    10.58495    0.03200    0.02401 =
         0.03046   -0.00156    0.00124   -0.00086
C2A   1   -0.263378   -0.529927   -0.400562    10.58495    0.02779    0.02101 =
         0.03150    0.00441    0.00063    0.00023
C3A   1   -0.284646   -0.571897   -0.475979    10.58495    0.02779    0.02101 =
         0.03150    0.00441    0.00063    0.00023
C4A   1   -0.221218   -0.429451   -0.533518    10.58495    0.02569    0.02259 =
         0.03282   -0.00244   -0.00276    0.00115
C5A   1   -0.406358   -0.837363   -0.409276    10.58495    0.03141    0.03422 =
         0.02503    0.00040   -0.00666    0.00355
N1A   3   -0.137548   -0.252676   -0.501322    10.58495    0.03305    0.02228 =
         0.02898   -0.00050    0.00210   -0.00419
AFIX  43
H1A   2   -0.098532   -0.160400   -0.533390    10.58495   -1.20000
AFIX   0
N2A   3   -0.177632   -0.350431   -0.374768    10.58495    0.03982    0.03375 =
         0.02054   -0.00073   -0.00152    0.00147
AFIX  43
H2A   2   -0.166567   -0.327919   -0.326469    10.58495   -1.20000
AFIX   0
N3A   3   -0.375513   -0.760562   -0.481679    10.58495    0.03305    0.02228 =
         0.02898   -0.00050    0.00210   -0.00419
AFIX  43
H3A   2   -0.407793   -0.820727   -0.523644    10.58495   -1.20000
AFIX   0
N4A   3   -0.334993   -0.687286   -0.358629    10.58495    0.03690    0.02734 =
         0.02088    0.00349   -0.00432   -0.00234
AFIX  43
H4A   2   -0.336670   -0.694479   -0.309500    10.58495   -1.20000
AFIX   0
O1A   4   -0.027916   -0.050017   -0.404220    10.58495    0.04154    0.03576 =
         0.03542    0.00345    0.00126   -0.00781
O2A   4   -0.233056   -0.449055   -0.603350    10.58495    0.04402    0.03125 =
         0.02782    0.00310   -0.00012   -0.00581
O3A   4   -0.488432   -0.997609   -0.392687    10.58495    0.05237    0.03245 =
         0.03943    0.00821   -0.00045   -0.00727
PART 0
PART 2
C1B   1   -0.389095   -0.791748   -0.426665    10.41505    0.03200    0.02401 =
         0.03046   -0.00156    0.00124   -0.00086
C2B   1   -0.237592   -0.477754   -0.401018    10.41505    0.02779    0.02101 =
         0.03150    0.00441    0.00063    0.00023
C3B   1   -0.216818   -0.432742   -0.478132    10.41505    0.02779    0.02101 =
         0.03150    0.00441    0.00063    0.00023
C4B   1   -0.278516   -0.565775   -0.533422    10.41505    0.02569    0.02259 =
         0.03282   -0.00244   -0.00276    0.00115
C5B   1   -0.089374   -0.176066   -0.409604    10.41505    0.03141    0.03422 =
         0.02503    0.00040   -0.00666    0.00355
N1B   3   -0.359216   -0.747381   -0.501830    10.41505    0.03305    0.02228 =
         0.02898   -0.00050    0.00210   -0.00419
AFIX  43
H1B   2   -0.393840   -0.841764   -0.533972    10.41505   -1.20000
AFIX   0
N2B   3   -0.324131   -0.652125   -0.376233    10.41505    0.03982    0.03375 =
         0.02054   -0.00073   -0.00152    0.00147
AFIX  43
H2B   2   -0.337602   -0.673659   -0.327984    10.41505   -1.20000
AFIX   0
N3B   3   -0.126356   -0.235969   -0.480893    10.41505    0.03305    0.02228 =
         0.02898   -0.00050    0.00210   -0.00419
AFIX  43
H3B   2   -0.099811   -0.166882   -0.521711    10.41505   -1.20000
AFIX   0
N4B   3   -0.161461   -0.325125   -0.359013    10.41505    0.03690    0.02734 =
         0.02088    0.00349   -0.00432   -0.00234
AFIX  43
H4B   2   -0.157542   -0.319626   -0.309876    10.41505   -1.20000
AFIX   0
O1B   4   -0.471380   -0.960282   -0.405600    10.41505    0.04154    0.03576 =
         0.03542    0.00345    0.00126   -0.00781
O2B   4   -0.268635   -0.543267   -0.603629    10.41505    0.04402    0.03125 =
         0.02782    0.00310   -0.00012   -0.00581
O3B   4   -0.009174   -0.007454   -0.392325    10.41505    0.05237    0.03245 =
         0.03943    0.00821   -0.00045   -0.00727

PART 0
OW1   4    0.089795    0.227947   -0.279546    11.00000    0.07396    0.08480 =
         0.05363   -0.00271   -0.00300   -0.00264
HW1A  2    0.079151    0.126715   -0.318892    11.00000   -1.50000
HW1B  2    0.189728    0.287344   -0.303472    11.00000   -1.50000

OW2   4   -0.404738   -0.747953   -0.217085    11.00000    0.08782    0.08350 =
         0.05129   -0.01212    0.00706    0.00844
HW2A  2   -0.355960   -0.814156   -0.171819    11.00000   -1.50000
HW2B  2   -0.476329   -0.628596   -0.204526    11.00000   -1.50000
HKLF 4


REM  UrAcDih_143K in P2(1)/c
REM wR2 = 0.1260, GooF = S = 1.058, Restrained GooF = 1.057 for all data
REM R1 = 0.0456 for 1241 Fo > 4sig(Fo) and 0.0564 for all 1524 data
REM 165 parameters refined using 5 restraints

END

WGHT      0.0709      0.1342

REM Highest difference peak  0.324,  deepest hole -0.222,  1-sigma level  0.057
Q1    1  -0.3068 -0.6424 -0.2163  11.00000  0.05    0.32
Q2    1   0.1942  0.1605 -0.2787  11.00000  0.05    0.25
Q3    1  -0.1446 -0.3025 -0.5920  11.00000  0.05    0.21
Q4    1  -0.4407 -0.7648 -0.2830  11.00000  0.05    0.20
Q5    1  -0.4659 -0.9183 -0.5344  11.00000  0.05    0.20
Q6    1  -0.3431 -0.6856 -0.6031  11.00000  0.05    0.20
Q7    1  -0.1030 -0.2628 -0.2748  11.00000  0.05    0.19
Q8    1  -0.3607 -0.7391 -0.1137  11.00000  0.05    0.19
Q9    1   0.1349  0.2538 -0.2364  11.00000  0.05    0.19
Q10   1  -0.2451 -0.5011 -0.5051  11.00000  0.05    0.18
Q11   1  -0.3415 -0.5597 -0.6036  11.00000  0.05    0.18
Q12   1   0.0863  0.3884 -0.2192  11.00000  0.05    0.18
Q13   1  -0.0833 -0.1974 -0.3594  11.00000  0.05    0.18
Q14   1  -0.0187 -0.0817 -0.5187  11.00000  0.05    0.18
Q15   1  -0.4846 -0.9450 -0.4819  11.00000  0.05    0.16
Q16   1  -0.1167 -0.1286 -0.6028  11.00000  0.05    0.16
Q17   1  -0.2803 -0.5641 -0.6433  11.00000  0.05    0.15
Q18   1  -0.3010 -0.7051 -0.2778  11.00000  0.05    0.15
Q19   1  -0.2353 -0.5546 -0.6545  11.00000  0.05    0.15
Q20   1  -0.1080 -0.4971 -0.6019  11.00000  0.05    0.15
;
_shelx_res_checksum                39862
_shelx_hkl_file
;
   0   0  -1 6.21756 2.72641   3
   0   0  -1 0.15483 2.58349  19
   0   0  -1 2.46184 2.93078  12
   0   0   1 2.99692 2.15002  17
   0   0  -2 45631.0 1320.77  19
   0   0  -2 44063.9 1320.57   3
   0   0   2 45253.3 1319.95  17
   0   0   2 42597.7 1318.98  18
   0   0  -2 45390.9 1320.54  12
   0   0  -2 45426.3 1319.30  11
   0   0   3 5.91620 3.96063  18
   0   0  -3 13.1522 8.50307   3
   0   0  -3 15.4003 9.01367  12
   0   0   3 5.27502 6.89629  17
   0   0  -3 5.26588 8.73276  19
   0   0  -3 3.11677 5.46839  11
   0   0  -4 6719.28 206.340  12
   0   0  -4 6728.79 203.609  11
   0   0  -4 6800.50 206.428   3
   0   0  -4 6730.85 206.832  19
   0   0   4 6785.95 204.959  17
   0   0  -5 13.5305 13.1120   3
   0   0   5 22.7656 11.6160  17
   0   0  -5 29.9489 14.1386  19
   0   0   6 12603.8 386.257  17
   0   0  -6 12804.5 389.267  19
   0   0  -6 13040.9 389.546   4
   0   0  -6 12737.8 388.669   3
   0   0  -7 3.63465 13.6020   3
   0   0  -7 6.62197 14.9353  19
   0   0  -7 14.7047 14.5269   4
   0   0  -8 32019.4 972.151   4
   0   0  -8 32248.3 971.915  19
   0   0  -8 32471.5 970.372   3
   0   0  -9 1.69516 15.4317   3
   0   0  -9 3.84300 17.6115  19
   0   0  -9 3.87925 16.4681   4
   0   0 -10 39065.1 1197.95   4
   0   0 -10 40184.8 1194.70   3
   0   0 -11-2.28961 19.5939   3
   0   0 -11-15.9269 21.1664   4
   0   0 -12 114.527 20.7999  31
   0   0 -12 73.0424 23.6211   4
   0   0 -12 132.861 17.7306  36
   0   0 -13 1.49247 19.3810  31
   0   0 -13 26.3898 17.3878  36
   0   0 -13 3.43853 22.4375   4
   0   0 -14 69.1206 23.1982   9
   0   0 -14 91.3605 23.6081  26
   0   0 -14 66.5315 22.1053  31
   0   0 -14 111.360 27.7234   2
   0   0 -15-23.1947 21.4020  26
   0   0 -15 24.1149 23.7165  31
   0   0 -16 5380.67 179.638  31
   0   0 -16 5495.37 181.355  26
   0   0 -17 24.3189 22.2936  31
   0   0 -17 15.4432 20.9828  26
   0   0 -18-4.83776 20.3655  31
   0   0 -18 3.57607 20.0258  26
   0   0 -19 19.7982 19.1797  31
   0   0 -19-34.2801 19.1123  26
   0   0 -20 5.74966 16.3728  31
   0   0 -20 17.8134 16.3281  26
   0   0 -21 15.2109 13.1490  26
   0   0 -21-1.23007 15.0865   8
   0   0 -21-0.85153 13.0224  31
   0  -1   0 0.87729 7.21002  18
   0   1   0-0.99415 5.81769  13
   0  -1   0-0.72258 11.4708   5
   0  -1   0-2.24612 7.39941  11
   0  -1  -1 6414.63 203.395  16
   0  -1  -1 6747.43 200.042  11
   0  -1  -1 6424.81 201.423   6
   0   1  -1 6430.77 197.265  12
   0  -1  -1 6529.17 201.710   1
   0  -1  -1 6717.27 198.489  18
   0  -1   1 6726.65 199.965  18
   0  -1  -2 30.5694 10.4243  21
   0  -1  -2 21.2862 11.1797   1
   0   1  -2 31.2431 8.72931  12
   0  -1  -2 28.5976 6.79344   9
   0  -1  -2 30.0292 10.7312  11
   0  -1  -2 30.2098 6.38729  18
   0  -1   2 33.8409 9.50723  18
   0   1   2 33.0786 7.13774  20
   0  -1  -2 32.4990 11.3631   2
   0  -1  -2 43.4596 16.2538  16
   0  -1  -3 1143.94 42.5627   2
   0  -1  -3 1204.14 41.6782  21
   0  -1   3 1186.71 41.6194  18
   0  -1  -3 1112.93 41.8143  11
   0  -1   3 1186.31 42.8172  17
   0  -1  -3 1195.97 43.3215   1
   0  -1  -3 1215.74 46.2442  16
   0   1  -3 1164.41 40.9336  12
   0  -1  -3 1148.49 37.2021  15
   0   1  -4 45.0118 13.4984  12
   0  -1   4 45.2981 14.8467  17
   0  -1  -4 50.8050 12.9009  11
   0  -1   4 44.3753 11.1435  18
   0  -1  -4 31.2667 14.2895   2
   0  -1  -5 2763.35 94.4966   2
   0  -1   5 2888.31 92.7794  18
   0   1  -5 2953.61 94.2022  12
   0  -1   5 2800.17 94.8464  17
   0  -1  -5 2845.94 93.4975  11
   0   1  -6 28.4635 15.3788  12
   0  -1  -6 26.2547 14.8658   2
   0  -1  -6 25.0352 12.5674  11
   0  -1   6 30.7158 15.9373  17
   0   1  -6 21.7631 13.3172  19
   0  -1   7 8588.90 267.908  17
   0   1  -7 8534.99 268.041  19
   0  -1  -7 8697.99 269.128   2
   0  -1   8 118.513 20.8995  17
   0   1  -8 115.171 20.2338   3
   0  -1  -8 147.526 21.7769   2
   0   1  -8 157.055 20.8603  19
   0   1  -9 30.0483 17.9661   3
   0  -1  -9-11.1425 17.1368   2
   0  -1 -10 110.279 22.8759   2
   0   1 -10 114.567 21.6704   3
   0  -1 -11 1975.90 81.7777   2
   0   1 -11 1990.68 82.0745   4
   0   1 -11 1908.29 80.1065   3
   0  -1 -12 17.0028 22.6089   2
   0   1 -12 10.6947 20.8521   3
   0  -1 -12 51.8328 20.0063  26
   0   1 -12 48.1942 22.0168   4
   0  -1 -12 10.6357 19.6441  31
   0   1 -12 27.1678 19.6756  31
   0  -1 -13 1288.28 54.2774  31
   0   1 -13 1344.12 55.1991  31
   0   1 -13 1209.45 64.3304   3
   0  -1 -13 1345.59 55.5516  26
   0  -1 -13 1255.55 64.8283   2
   0   1 -13 1105.29 65.1038   4
   0   1 -14 138.171 26.0555  31
   0  -1 -14 132.060 26.1249  31
   0  -1 -14 141.562 24.9214  26
   0  -1 -15 25.1606 22.3888  31
   0   1 -15 34.3225 23.0138  31
   0  -1 -15 61.5097 22.9764  26
   0  -1 -16 11.3585 22.1443  26
   0   1 -16 1.99607 22.7600  26
   0   1 -16 15.7248 22.1473  31
   0  -1 -16 22.1466 21.9351  31
   0  -1 -17 53.1690 21.7466  26
   0   1 -17 42.1370 22.8480  26
   0  -1 -17 70.9384 23.2293  31
   0   1 -17 91.7011 23.4577  31
   0   1 -18-1.56835 20.8708  31
   0  -1 -18 1.68025 18.8613  26
   0  -1 -18-1.51577 19.7135  31
   0   1 -18 10.4740 20.3746  26
   0  -1 -19 130.837 20.9805  26
   0   1 -19 120.632 20.7286  31
   0  -1 -19 139.133 20.8376  31
   0   1 -19 145.934 21.9502  26
   0  -1 -19 164.537 25.5887   8
   0   1 -20 8.70610 15.6866  31
   0  -1 -20-1.16176 14.4099  26
   0  -1 -20 5.15732 14.9288  31
   0   1 -20 16.9267 15.7255  26
   0  -1 -20 6.23076 17.6824   8
   0  -1 -21 36.4916 12.6858  26
   0  -1 -21 34.1950 15.5341   8
   0   1 -21 59.1423 14.0086  26
   0  -2   0 8693.36 272.366   5
   0  -2   0 8656.48 266.200  18
   0  -2  -1-8.82497 21.1856   5
   0  -2  -1 34.3361 20.1337   6
   0  -2   1 12.1077 22.8187   5
   0  -2  -1 38.3902 14.8784  11
   0  -2  -1 53.0538 20.3374   1
   0  -2   1 27.4562 12.7783  18
   0  -2  -1 24.0605 12.0691  18
   0  -2  -2 10147.5 311.252   1
   0  -2   2 9808.69 307.159  18
   0  -2  -2 10319.5 310.933   6
   0  -2  -2 10008.1 307.693  11
   0  -2  -2 9933.55 304.716  18
   0  -2  -3 692.035 40.7772   1
   0  -2  -3 787.849 39.5134  11
   0  -2   3 770.800 38.2008  18
   0  -2  -4 51235.0 1526.75   1
   0  -2   4 51052.4 1523.58  18
   0  -2  -4 51534.8 1530.53  16
   0  -2  -4 50501.3 1524.12  11
   0  -2  -5 382.295 36.5150  16
   0  -2  -5 342.905 29.9923   2
   0  -2   5 382.258 28.8647  18
   0  -2  -5 415.153 31.4347  11
   0  -2  -6 17081.0 530.947  16
   0  -2   6 16965.8 523.476  18
   0  -2  -6 17361.3 525.269   2
   0  -2  -6 17335.7 524.453  11
   0  -2  -7 19.1537 17.7507   2
   0  -2  -7 21.0616 20.4888  16
   0  -2  -7 6.57248 14.7048  11
   0  -2  -8 9.05281 15.1312  11
   0  -2  -8 27.1858 17.6190   2
   0  -2  -8-7.73539 21.6338  16
   0  -2  -9 11.5564 21.9881  16
   0  -2  -9 19.7604 18.5001   2
   0  -2 -10 1846.85 84.7787  16
   0  -2 -10 1779.83 77.1080   2
   0  -2  11-3.23494 19.6962  29
   0   2 -11 34.2089 20.8959   3
   0  -2 -11 30.8442 22.7606   2
   0  -2 -11 36.5629 24.6455  16
   0  -2 -12 6.31717 22.9488   2
   0   2 -12 2.93364 21.5424   3
   0   2 -13 138.909 30.7954   4
   0   2 -13 136.903 32.9683   3
   0  -2 -13 170.499 31.3302   2
   0  -2 -14 18485.5 572.850   8
   0  -2 -15 2.56639 26.2983   8
   0   2 -16 1600.48 65.9237  26
   0  -2 -16 1457.98 70.8116   8
   0   2 -17-22.7909 20.1239  26
   0  -2 -17-7.03707 24.1714   8
   0   2 -18 15.4217 18.2680  26
   0  -2 -18 22.7959 21.6407   8
   0   2 -19 2.55232 16.2630  26
   0  -2 -19 24.1023 19.0654   8
   0  -2 -20 799.725 40.4865   8
   0   2 -20 945.564 37.7218  26
   0  -3   0 13.6740 13.3988  18
   0  -3   0-9.51616 18.1025   1
   0  -3   0-2.37902 22.7426   5
   0  -3   0 15.5164 22.0923   6
   0  -3  -1 82.2676 16.4559  18
   0  -3  -1 77.2263 20.7514   1
   0  -3   1 66.8047 15.6849  18
   0  -3   1 65.9909 24.8008   5
   0  -3  -1 74.2266 23.5930   6
   0  -3  -2 62.1766 24.7486   6
   0  -3  -2 25.2433 21.1503   1
   0  -3   2 50.7270 27.2614   5
   0  -3   2 54.8008 19.3112  18
   0  -3   3 8095.03 274.256   5
   0  -3  -3 8486.65 271.499   1
   0  -3   3 8494.07 266.182  18
   0  -3   4 71.9863 19.2537  18
   0  -3  -4 48.3304 21.1003   1
   0  -3   5 1354.11 57.9694  18
   0  -3  -5 1296.09 60.5826   1
   0  -3  -6 132.314 24.2151   1
   0  -3   6 116.032 21.3987  18
   0  -3   7 6630.48 219.171  18
   0  -3  -9 58.9460 24.3306   8
   0  -3   9 61.9829 21.7293  29
   0  -3  -9 44.6033 18.3043  25
   0  -3  10 30.0016 21.4825  29
   0  -3 -10 31.7012 25.5769   8
   0   3 -10-5.94662 15.4013  22
   0   3 -11 1440.71 56.9045  22
   0  -3  11 1293.04 58.8991  29
   0  -3 -11 1280.89 62.8407   8
   0  -3 -12 40.9163 27.3487   8
   0  -3  12 30.7364 23.9488  29
   0   3 -12 50.2262 18.7081  22
   0  -3 -13 496.514 40.6264   8
   0  -3  13 537.108 38.5223  29
   0   3 -13 530.722 32.3397  22
   0  -3 -14-2.54101 26.5952   8
   0  -3  14-2.25364 24.1313  29
   0  -3 -15 945.735 54.6467   8
   0  -3  15 963.830 52.3302  29
   0  -3 -16 4.65430 24.6083   8
   0  -3 -17 216.915 28.5729   8
   0  -3 -18 10.3835 18.9413   8
   0  -3 -19 20.2214 16.6064   8
   0  -4   0 21945.8 666.870   6
   0  -4   0 20861.2 668.189   1
   0  -4   1 519.211 48.5790   5
   0  -4   1 430.343 47.2572   6
   0  -4   1 324.541 43.1272   1
   0  -4  -1 414.563 42.4127   1
   0  -4  -1 409.939 45.6409   6
   0  -4  -2 1223.73 64.9303   1
   0  -4   2 1147.37 68.0554   6
   0  -4  -2 1082.30 65.1556   6
   0  -4   3 92.4965 35.1741   5
   0  -4  -3 81.0837 25.4007   1
   0  -4   4 1388.04 76.3916   5
   0  -4  -4 1331.21 67.9994   1
   0  -4  -4 1397.15 57.4699   7
   0  -4  -4 1379.76 56.2211  25
   0  -4  -4 1315.77 62.2241   8
   0  -4  -5 142.586 31.3415   1
   0  -4   5 200.574 26.3291  29
   0  -4  -5 166.467 24.4191   7
   0  -4  -5 227.332 35.1463   8
   0  -4  -5 230.339 24.7896  25
   0  -4   5 224.878 45.3998   5
   0  -4   6 673.136 56.8447   5
   0  -4  -6 662.917 35.6885  25
   0  -4  -6 559.225 45.2607   1
   0  -4  -6 628.580 42.3143   8
   0  -4   6 593.250 36.2820  29
   0  -4  -7 112.865 28.2725   8
   0  -4   7 115.387 25.6948  29
   0  -4  -7 60.2634 21.3847  25
   0  -4   7 86.9067 38.0695   5
   0  -4   8 1130.85 53.9871  29
   0  -4  -8 1154.00 60.0243   8
   0   4  -8 1148.23 49.5066  22
   0  -4  -8 1182.71 52.0957  25
   0  -4   8 1094.84 76.6066   5
   0  -4  -9 73.1399 30.0140   8
   0   4  -9 46.0929 19.4242  22
   0  -4   9 78.7180 24.8361  29
   0  -4  -9 69.3339 22.9580  25
   0  -4  10 5505.31 187.109  29
   0   4 -10 5782.70 184.392  22
   0  -4 -10 5572.40 192.106   8
   0  -4 -11 328.567 39.2068   8
   0  -4  11 328.574 33.7693  29
   0   4 -11 250.019 27.2853  22
   0  -4  12 557.435 39.6043  29
   0  -4 -12 526.713 43.9219   8
   0  -4 -13 108.762 31.3794   8
   0   4 -13 166.574 23.4502  22
   0  -4  13 171.000 30.0132  29
   0   4 -14 36.5078 17.8284  22
   0  -4  14 12.6432 23.6124  29
   0  -4 -14 16.4917 26.1574   8
   0  -4 -15-2.15800 22.9939   8
   0   4 -15 7.35762 14.8761  22
   0  -4  15 24.0023 23.0529  29
   0  -4  16 300.758 28.7654  29
   0  -4 -16 258.449 28.2196   8
   0  -4  16 271.026 29.6137  24
   0  -4  17 95.3529 21.7154  29
   0  -4 -17 111.936 21.7638   8
   0  -4  17 113.404 22.5686  24
   0  -4 -18 591.141 32.5736   8
   0  -4  18 725.488 35.4582  24
   0  -5   0 93.0527 26.7471   1
   0  -5   0 11.7738 24.1565   7
   0  -5   0 99.6136 28.6971   6
   0  -5   0 24.0582 20.7792  25
   0  -5  -1 2264.37 105.355   1
   0  -5   1 2364.87 107.594   6
   0  -5   1 2338.15 108.025   1
   0  -5   1 2287.56 87.1397  25
   0  -5  -1 2329.46 86.7351  25
   0  -5   1 2218.36 89.0864   7
   0  -5  -1 2386.62 88.5798   7
   0  -5  -2 7.25214 20.3069  25
   0  -5   2-14.4268 28.7573   1
   0  -5   2-4.18152 24.9560   7
   0  -5   2-7.69348 21.1491  25
   0  -5  -2 24.4203 22.4670   7
   0  -5   2 26.6936 29.9798   6
   0  -5  -2 25.2735 23.9600   1
   0  -5  -3 1003.16 48.7395  25
   0  -5  -3 1084.70 65.0692   1
   0  -5   3 931.564 66.9385   6
   0  -5  -3 1031.97 50.4676   7
   0  -5   3 936.957 67.6433   1
   0  -5  -4-7.33576 21.0907   7
   0  -5   4-10.4532 36.5165   5
   0  -5  -4-10.8745 19.6460  25
   0  -5   4 24.2780 32.3082   6
   0  -5  -5 25.5101 19.4288  25
   0  -5  -6 5.48142 19.2736  25
   0  -5   6 13.7074 21.4315  29
   0  -5  -7 682.361 39.1086  25
   0  -5   7 722.729 41.0764  29
   0  -5  -8 138.786 23.4139  25
   0   5  -8 97.3148 20.5281  22
   0  -5   8 97.2577 25.1562  29
   0   5  -9 203.695 22.3165  22
   0  -5   9 163.953 25.2246  29
   0  -5  -9 155.466 22.6492  25
   0  -5  10 81.9590 24.7541  29
   0   5 -10 96.1967 20.2275  22
   0  -5  11 93.4682 23.7222  29
   0   5 -11 91.5389 19.8090  22
   0  -5  12 35.4262 21.6189  29
   0   5 -12 50.2365 18.5212  22
   0   5 -13 34.2377 16.7701  22
   0  -5  13 31.2232 20.4020  24
   0  -5  13 20.8389 20.0750  29
   0  -5  14-5.08696 18.4242  24
   0  -5  14-4.71746 18.3914  29
   0   5 -14 10.4095 14.0359  22
   0  -5  15 284.557 24.7298  24
   0  -5  15 262.210 24.1262  29
   0  -5  16 7.77023 14.1716  29
   0  -5  16 16.0735 15.9756  24
   0  -6   0 119.204 25.3006   7
   0  -6   0 136.339 22.6086  25
   0  -6   1 38.0888 20.3509  25
   0  -6  -1 45.0252 19.2357  25
   0  -6  -1 61.0092 24.2324   7
   0  -6   1 80.7453 25.4398   7
   0  -6  -2 1186.61 55.3682   7
   0  -6  -2 1221.64 53.8254  25
   0  -6   2 1154.91 57.3953   7
   0  -6   3 385.508 38.5599   7
   0  -6  -3 451.657 33.9317  25
   0  -6  -3 423.897 35.9630   7
   0  -6   4 8665.37 279.589   7
   0  -6  -4 8696.57 275.125  25
   0  -6  -5 59.1593 20.6468  25
   0  -6   5 71.7791 27.1911   7
   0  -6   6 1667.92 73.6904   7
   0  -6  -6 1790.98 68.8985  25
   0  -6  -7 107.157 20.9549  25
   0  -6   7 101.902 26.8623   7
   0  -6   8 29.7118 23.6117   7
   0  -6   9 7.39427 21.1230   7
   0  -6   9 10.7673 17.3463  29
   0  -6  10 15.6616 16.4151  29
   0  -6  11-1.29450 15.1087  29
   0  -6  12 18.3232 14.3931  29
   0  -6  12 12.9620 16.0531   7
   0  -6  13 14.5573 12.6036  29
   0  -6  13 3.22404 14.3270   7
   0  -7   0-8.64506 17.0275   7
   0  -7  -1 116.907 16.4585  25
   0  -7   1 132.943 20.0843   7
   0  -7   2 2.92698 17.3988   7
   0  -7  -2 5.18219 13.7348  25
   0  -7  -3 143.815 17.3261  25
   0  -7   3 128.756 19.8575   7
   0  -7  -4 16.9890 12.9311  25
   0  -7   4-8.44340 16.5961   7
   0  -7  -5 103.682 15.4665  25
   0  -7   5 61.8605 17.7311   7
   0  -7   6-2.51717 15.9514   7
   0  -7   7 63.2829 16.4854   7
   0  -7   8 12.2682 13.6097   7
   0  -7   9 3.50392 11.6948   7
  -1   0 -21 4.52283 14.4315   8
  -1   0 -21 14.2298 12.1038  31
  -1   0 -21-10.1992 11.4008  26
  -1   0 -20 110.704 17.8668  31
  -1   0 -20 101.277 17.0370  26
  -1   0 -20 131.207 20.9061   8
  -1   0 -19 5.77793 17.0719  26
  -1   0 -19 17.2694 17.5958  31
  -1   0 -18 1004.49 48.1527  26
  -1   0 -18 1099.54 48.9623  31
  -1   0 -17 10.0620 20.9519  31
  -1   0 -17-1.82976 20.0245  26
  -1   0 -16 2866.35 101.886  26
  -1   0 -16 2654.15 100.039  31
  -1   0 -15 3.25622 17.9440  36
  -1   0 -15 5.19807 21.9215  31
  -1   0 -14 87.4643 25.8279   2
  -1   0 -14 70.1046 19.1058  36
  -1   0 -14 87.9486 23.8359  31
  -1   0 -14 76.6121 26.4240   9
  -1   0 -13 1.44900 16.1553  36
  -1   0 -13 18.6138 18.5145  34
  -1   0 -13-9.13477 20.8996   2
  -1   0 -13 10.3173 23.1745   4
  -1   0 -13-3.02949 20.5416   9
  -1   0 -13 3.08937 21.3637  31
  -1   0 -12 64.1121 24.0438   4
  -1   0 -12 102.794 19.2133  34
  -1   0 -12 75.4460 23.3794   9
  -1   0 -12 93.6472 16.9466  36
  -1   0 -11 5.33638 20.1035   4
  -1   0 -11 26.1145 18.5892   9
  -1   0 -11-4.61626 18.2397   3
  -1   0 -10 35.0585 19.3027   9
  -1   0 -10 19.9331 18.2926   3
  -1   0 -10 39.1441 18.6259   4
  -1   0  -9 15.9589 17.8259   9
  -1   0  -9 1.95286 16.2534   4
  -1   0  -9 13.7008 16.1696   3
  -1   0  -8 4674.06 154.127   9
  -1   0  -8 4585.98 155.303   4
   1   0   8 4688.95 153.930  17
  -1   0  -8 4775.07 153.853   3
  -1   0  -7 27.9269 13.4789   3
  -1   0  -7 5.45015 13.8518   4
   1   0   7-2.53212 15.1747  17
  -1   0  -7 7.65489 13.6981   9
  -1   0  -6 13599.8 406.890   4
  -1   0  -6 13284.4 406.700   9
  -1   0  -6 13393.5 406.084   3
   1   0   6 13153.7 406.267  17
  -1   0  -5 12.5161 13.5259   9
  -1   0  -5 16.5403 10.5068  10
  -1   0  -5 11.3493 11.9891   3
  -1   0  -5 11.4533 12.1359   4
   1   0   5 6.31146 13.8926  17
   1   0   4 8418.53 256.732  17
  -1   0  -4 8318.88 255.332  10
  -1   0  -4 8611.62 256.850   9
  -1   0  -4 8296.91 255.298   3
  -1   0  -3 25.9508 9.82891  10
  -1   0  -3 27.1603 9.33554   3
   1   0   3 26.3421 12.3531  17
  -1   0  -3 18.7188 12.1215   9
  -1   0  -2 15942.1 475.517  13
  -1   0  -2 16087.4 476.328   9
  -1   0  -2 15977.6 473.582   3
   1   0   2 15850.3 473.905  21
  -1   0  -2 15728.1 473.083  16
  -1   0  -1 3.43934 3.48275   3
  -1   0  -1 1.01063 3.66765   4
  -1   0  -1 4.49894 8.23411  20
   1   0   0 4.57086 6.82796  14
  -1   0   0 1.98855 7.62137  20
   1   0  -1 3.86973 3.64717   4
   1   0  -1 5.21787 8.12615  14
   1   0  -1 1.40770 3.26463   3
   1   0  -2 16528.3 494.428  19
   1   0  -2 16501.4 491.982   3
   1   0  -3 12.8605 9.27791   3
   1   0  -3 21.5754 12.0579  19
   1   0  -4 8856.09 271.233   3
   1   0  -4 9056.99 273.960  19
   1   0  -5 6.47886 12.2958   3
   1   0  -5 0.89400 12.2371   4
   1   0  -5 19.0986 14.7281  12
   1   0  -5 5.38978 15.6860  19
   1   0  -6 14287.2 430.577   4
   1   0  -6 14272.0 429.898  12
   1   0  -6 14200.7 432.874  19
   1   0  -6 13879.9 429.678   3
   1   0  -7-4.86918 13.3217   3
   1   0  -7 4.81960 14.6372  12
   1   0  -7-4.67985 15.3684  19
   1   0  -7 12.4151 14.6606   4
   1   0  -8 4713.57 154.360  12
   1   0  -8 4746.73 156.612   4
   1   0  -8 4774.22 158.596  19
   1   0  -8 4639.96 154.540   3
   1   0  -9 15.2508 18.8597  19
   1   0  -9-3.25611 15.8049  12
   1   0  -9 5.91494 16.4087   4
   1   0  -9 18.7584 16.5048   3
   1   0 -10 78.8981 24.9318  19
   1   0 -10 92.9050 21.3797   4
   1   0 -10 39.9180 18.8853   3
   1   0 -11 14.8526 22.1552  19
   1   0 -11-2.69034 19.9629   4
   1   0 -12 112.568 28.2373  19
   1   0 -12 135.054 21.9827  26
   1   0 -12 116.993 26.4588   4
   1   0 -12 92.6159 21.7392  31
   1   0 -13 6.73958 20.8967  26
   1   0 -13-20.8243 22.9448   4
   1   0 -13 18.4119 20.0215   2
   1   0 -13-12.0844 20.1338  31
   1   0 -14 40.7430 22.7211   2
   1   0 -14 84.0006 23.3082  31
   1   0 -15-11.7272 22.2837  26
   1   0 -15 3.49994 22.6832  31
   1   0 -16 2887.69 106.765  26
   1   0 -16 2966.13 105.841  31
   1   0 -17-1.95663 22.1615  26
   1   0 -17-12.3084 22.5598  31
   1   0 -18 1090.10 49.8811  31
   1   0 -18 1022.03 49.8987  26
   1   0 -19-18.3994 19.3159  31
   1   0 -19-9.42768 18.0355  26
   1   0 -20 162.118 19.9500  26
   1   0 -20 131.116 18.7398  31
   1   0 -20 122.741 21.4998   8
   1   0 -21-2.80007 12.2628  26
   1   0 -21-14.6125 14.3234   8
  -1   1 -21 0.82487 11.1342  26
  -1  -1 -20 187.809 22.2013   8
  -1  -1 -20 201.462 18.7721  31
  -1   1 -20 198.884 20.1206  26
  -1   1 -20 189.601 19.3110  31
  -1  -1 -19 108.931 19.1888  31
  -1   1 -19 110.858 20.0514  31
  -1   1 -19 101.633 20.1570  26
  -1  -1 -19 67.8496 21.6896   8
  -1   1 -18 223.614 25.6621  26
  -1   1 -18 212.900 24.7572  31
  -1  -1 -18 234.603 24.4724  31
  -1  -1 -18 163.441 28.1997   8
  -1  -1 -17 542.866 35.3860  31
  -1   1 -17 618.013 36.4259  31
  -1   1 -17 572.481 37.3012  26
  -1  -1 -17 548.335 35.1590  26
  -1  -1 -16 808.835 43.2242  26
  -1  -1 -16 878.345 44.1684  31
  -1   1 -16 901.885 45.6263  31
  -1   1 -16 756.618 39.7276  36
  -1   1 -15 91.1628 24.2134  31
  -1   1 -15 77.1507 19.5156  36
  -1  -1 -15 99.3014 23.9018  31
  -1  -1 -15 99.3388 22.3184  26
  -1  -1 -15 83.9333 21.0615  34
  -1   1 -14 107.580 20.3603  36
  -1   1 -14 136.783 29.6916   4
  -1  -1 -14 101.243 22.5378  34
  -1   1 -14 124.443 24.6656  31
  -1  -1 -14 154.658 24.6115  31
  -1  -1 -13 486.911 31.9801  34
  -1   1 -13 517.098 33.8941  31
  -1  -1 -13 442.062 39.7717   2
  -1  -1 -13 509.750 33.3274  31
  -1   1 -13 544.802 44.2287   4
  -1   1 -13 498.917 39.7653   3
  -1   1 -13 530.015 31.6576  36
  -1   1 -13 505.342 42.1375   9
  -1   1 -12 1028.92 56.1457   3
  -1   1 -12 1101.84 45.9032  36
  -1  -1 -12 1027.87 56.3314   2
  -1  -1 -12 1061.83 46.2852  36
  -1  -1 -12 1147.42 48.2561  34
  -1   1 -12 968.494 57.4056   4
  -1   1 -12 1179.37 58.5930   9
  -1  -1 -11 15.5447 14.1617  36
  -1  -1 -11 24.8141 20.0502   2
  -1   1 -11-7.16749 19.1365   3
   1  -1  11-5.34100 23.1174  17
  -1   1 -11 12.3872 19.8434   9
  -1   1 -11 18.3852 18.8786   4
  -1   1 -10 1830.30 71.9953   9
  -1  -1 -10 1646.23 70.5210   2
  -1   1 -10 1643.39 70.0164   3
   1  -1  10 1713.21 72.4002  17
  -1  -1 -10 1634.69 68.9596   9
  -1   1  -9 1507.92 63.8067   3
  -1  -1  -9 1593.14 64.5706   2
  -1  -1  -9 1571.73 63.7174   9
   1  -1   9 1594.97 65.9686  17
  -1   1  -8 2593.86 92.9168   3
   1  -1   8 2647.36 94.2647  17
  -1  -1  -8 2647.56 93.0817   2
  -1  -1  -8 2511.88 91.7310   9
  -1  -1  -7 280.214 22.8569   2
  -1  -1  -7 290.294 22.8160   9
   1  -1   7 320.485 24.6572  17
  -1  -1  -7 292.871 22.0014  11
   1  -1   6 13066.6 389.243  17
  -1  -1  -6 12701.1 387.671   9
  -1  -1  -6 12364.7 388.137  11
  -1  -1  -6 12598.7 388.421   2
  -1  -1  -6 12942.4 391.619  16
  -1  -1  -5 1443.50 53.2960  11
  -1  -1  -5 1475.41 53.8143   2
  -1  -1  -5 1446.45 57.0016  16
  -1  -1  -5 1432.32 52.9096   9
   1  -1   5 1394.37 53.5900  17
  -1  -1  -4 21044.1 634.694   2
  -1  -1  -4 21362.8 635.150  11
  -1  -1  -4 20725.0 634.530   9
   1  -1   4 21354.0 634.830  17
  -1  -1  -4 21287.6 637.903  16
   1  -1   3 1519.05 54.3554  17
  -1   1  -3 1565.67 53.6291   9
  -1  -1  -3 1512.22 54.8329   1
  -1   1  -3 1543.06 56.3074  13
  -1  -1  -3 1579.11 54.6792   2
  -1  -1  -2 8163.48 253.808   2
  -1   1  -2 8265.63 255.135  13
  -1  -1  -2 8348.10 253.642   1
  -1   1  -2 8308.21 251.803   9
   1  -1   2 8451.84 252.264  17
  -1  -1  -1 245.843 16.3528   1
  -1   1  -1 229.961 17.4326  13
   1  -1   1 241.967 21.1849  21
  -1  -1  -1 269.593 15.3868  15
  -1  -1  -1 241.179 10.6952  20
  -1  -1  -1 236.624 15.9147   6
  -1   1  -1 247.804 14.3011   9
   1  -1   1 278.038 14.3484  17
   1  -1   0 47.0851 15.0219  16
   1  -1   0 42.1147 9.07306  17
  -1   1   0 67.5522 15.7434  20
  -1  -1   0 31.5994 13.6125   5
  -1  -1   0 17.5598 10.3104  15
   1  -1   0 76.0613 18.4025  21
   1  -1   0 35.3690 13.5919   5
   1  -1  -1 263.502 17.1583   6
  -1   1   1 257.344 18.4867  20
   1  -1  -1 265.036 17.1213   1
  -1  -1   1 275.901 16.5582  15
   1  -1  -1 309.309 21.4776  21
   1  -1  -1 268.441 11.5787  17
   1  -1  -1 280.308 18.9100  16
   1  -1  -2 8089.96 253.613   2
   1  -1  -2 8448.86 254.519   1
  -1   1   2 8231.84 255.302  20
  -1  -1   2 8578.80 254.152  15
   1  -1  -3 1570.74 53.8933   1
  -1  -1   3 1430.47 52.4633  15
   1  -1  -3 1469.53 53.0182   2
   1  -1  -3 1493.94 49.8421  12
   1  -1  -4 21195.1 640.545  19
  -1  -1   4 21205.8 637.110  15
   1  -1  -4 21330.5 637.197   2
   1  -1  -4 21174.7 634.557  12
  -1  -1   5 1579.18 57.1353  15
   1  -1  -5 1604.94 59.1517  14
   1  -1  -5 1622.09 56.1637  12
   1   1  -5 1616.04 59.5117  12
   1  -1  -5 1622.17 62.6834  19
   1  -1  -5 1621.54 58.6067   2
   1  -1  -6 12044.6 375.124  14
   1  -1  -6 12210.5 380.138  19
   1   1  -6 12434.5 375.601  12
   1  -1  -6 12355.2 375.451   2
   1  -1  -7 415.407 31.0693  19
   1   1  -7 386.970 26.8650  12
   1  -1  -7 393.531 25.8505   2
   1   1  -7 360.763 26.9625  19
   1   1  -8 2636.06 93.9252   3
   1   1  -8 2675.68 96.5161  19
   1  -1  -8 2642.00 99.8155  19
   1   1  -8 2658.74 94.3525  12
   1  -1  -8 2578.58 94.0910   2
   1   1  -9 1610.04 66.8032   3
   1  -1  -9 1703.95 68.0591   2
   1   1  -9 1671.92 69.5724  19
   1   1  -9 1642.19 67.1486  12
   1   1 -10 1785.51 75.7975  19
   1   1 -10 1790.89 72.6330  12
   1   1 -10 1803.16 73.0398   3
   1  -1 -10 1705.92 73.5141   2
   1  -1 -11-7.55398 21.6299   2
   1   1 -11-10.6242 19.7086   4
   1  -1 -11 1.39014 16.3603  26
   1   1 -11-11.1262 21.2684  19
   1   1 -11-2.40091 20.1427   3
   1   1 -12 998.945 57.6214   4
   1   1 -12 1092.74 56.2622   3
   1  -1 -12 1075.11 46.8502  31
   1   1 -12 1055.32 47.7529  31
   1  -1 -12 1019.40 55.9407   2
   1  -1 -12 1103.32 48.2624  26
   1   1 -13 507.504 34.2671  31
   1   1 -13 503.049 41.3394   3
   1   1 -13 598.353 36.1079  26
   1  -1 -13 569.988 34.1211  31
   1   1 -13 552.232 44.3462   4
   1  -1 -13 490.502 41.0364   2
   1  -1 -13 582.083 36.4756  26
   1   1 -14 119.511 30.2011   4
   1  -1 -14 139.532 25.3299  26
   1   1 -14 182.976 26.1570  31
   1  -1 -14 142.327 24.6125  31
   1   1 -14 127.959 24.5265  26
   1   1 -15 90.3784 23.9144  31
   1   1 -15 118.397 25.0578  26
   1  -1 -15 77.3483 22.0302  26
   1  -1 -15 96.2296 24.3933  31
   1  -1 -16 755.039 42.6472  31
   1   1 -16 805.799 43.7465  31
   1  -1 -16 808.475 44.3989  26
   1   1 -16 865.276 45.0779  26
   1   1 -17 609.124 36.8872  31
   1  -1 -17 598.505 36.2653  31
   1   1 -17 673.561 38.7691  26
   1  -1 -18 161.024 27.5128   8
   1   1 -18 176.890 24.0422  26
   1  -1 -18 151.767 23.9433  26
   1   1 -18 113.375 23.2960  31
   1  -1 -18 167.039 24.0444  31
   1  -1 -19 94.6954 19.9655  31
   1   1 -19 124.798 21.1501  31
   1  -1 -19 126.164 20.6866  26
   1   1 -19 130.342 20.8967  26
   1  -1 -19 103.917 23.4785   8
   1  -1 -20 192.416 22.1363   8
   1  -1 -20 190.653 19.9817  26
   1   1 -20 190.578 19.8446  26
  -1  -2 -20 61.2950 16.6434   8
  -1   2 -20 73.2454 14.9619  26
  -1  -2 -19 87.3542 20.6600   8
  -1   2 -19 160.157 19.4486  26
  -1   2 -18 74.6177 19.6884  26
  -1  -2 -18 116.281 24.5012   8
  -1  -2 -17 94.5683 24.4489   8
  -1  -2 -16 111.864 27.2527   8
  -1  -2 -15 129.918 28.3073   8
   1  -2  15 129.625 29.4280  29
   1  -2  14 67.8843 26.7851  29
  -1  -2 -14 39.3155 26.4235   8
   1  -2  13 1118.03 58.6587  29
  -1   2 -13 1112.98 65.6967   4
  -1  -2 -12 96.8866 24.8925   2
  -1   2 -12 115.029 25.5278   3
  -1   2 -12 105.288 25.6026   9
  -1   2 -11 57.4226 21.1095   9
  -1   2 -11 66.2908 23.8222   3
  -1  -2 -11 103.620 24.1558   2
  -1   2 -10 43.6725 18.6811   9
  -1   2 -10 35.4194 19.5164   3
  -1  -2 -10 27.3729 19.6018   2
  -1  -2  -9 3295.25 119.303   2
  -1  -2  -8 2852.91 101.116  11
  -1  -2  -8 2663.46 100.199   2
  -1  -2  -8 2881.52 108.787  16
   1  -2   8 2661.13 101.543  17
  -1  -2  -7 1067.45 47.6989  11
   1  -2   7 936.054 46.4486  17
  -1  -2  -7 916.414 51.8087  16
  -1  -2  -7 1008.06 46.9785   2
   1  -2   6 3045.55 109.289  18
  -1  -2  -6 3160.52 109.031  11
  -1  -2  -6 3311.19 109.888   2
   1  -2   6 3028.41 108.897  17
   1  -2   5 1752.28 67.7571  18
  -1  -2  -5 1746.52 67.0029  11
   1  -2   5 1751.88 66.9044  17
  -1  -2  -5 1757.30 67.8908   1
  -1  -2  -4 4041.39 134.316  11
  -1  -2  -4 4062.80 136.639   1
   1  -2   4 4152.81 136.096  18
   1  -2   4 4113.52 134.219  17
  -1  -2  -3 4525.01 146.100  11
  -1  -2  -3 4513.30 148.404   1
   1  -2   3 4515.38 147.383  18
  -1   2  -2 3611.70 117.096  13
  -1  -2  -2 3444.54 118.706   1
  -1  -2  -2 3500.32 114.232  15
  -1  -2  -2 3475.29 115.402  11
  -1  -2  -2 3629.69 118.774   6
   1  -2   2 3489.13 116.510  18
  -1  -2  -1 159.107 23.7998   6
  -1  -2  -1 189.338 17.7976  11
  -1   2  -1 208.864 19.9385  13
  -1  -2  -1 149.938 16.4827  15
  -1  -2  -1 176.669 21.9984   1
   1  -2   1 110.653 24.9121   5
  -1  -2   0 24.6992 13.3986  15
   1  -2   0 6.01718 21.3574   5
  -1  -2   0 2.73025 12.4246  11
  -1  -2   0 9.77712 20.4358   6
  -1  -2   0 19.6421 21.4516   5
  -1   2   0 22.0383 15.7835  13
   1  -2  -1 112.669 21.9772   6
   1  -2  -1 141.736 22.2638  21
  -1  -2   1 163.844 15.8792  11
  -1  -2   1 90.8454 24.0755   5
   1  -2  -1 128.640 16.0436  18
   1  -2  -1 135.444 21.5312   1
   1  -2  -2 3826.20 126.072   1
   1  -2  -2 3689.80 120.430  18
   1  -2  -2 3593.37 124.860   6
   1  -2  -2 3726.80 129.456  16
   1  -2  -2 3982.78 127.240  21
   1  -2  -3 4472.71 155.130  16
   1  -2  -3 4711.20 152.193  21
   1  -2  -3 4621.73 151.431   1
   1  -2  -4 4221.31 143.287  16
   1  -2  -4 4290.41 139.919  21
   1   2  -4 4136.68 135.023  12
   1  -2  -4 4152.52 139.566   1
   1  -2  -5 1637.33 68.3490  16
   1   2  -5 1580.43 60.3726  12
   1  -2  -5 1540.45 63.4635   1
   1  -2  -5 1591.87 63.5095  21
   1  -2  -6 3428.76 123.868  16
   1  -2  -6 3402.10 117.163   2
   1   2  -6 3379.94 114.800  12
   1  -2  -7 937.275 44.9265   2
   1  -2  -7 891.650 51.0492  16
   1   2  -7 912.452 43.1652  12
   1  -2  -8 3073.37 109.296   2
   1   2  -8 2881.83 106.430  12
   1  -2  -8 3117.08 116.343  16
   1   2  -9 3169.54 118.592  12
   1   2  -9 3522.69 123.889  19
   1  -2  -9 3442.09 122.116   2
   1  -2  -9 3298.03 129.501  16
   1   2 -10 7.11968 19.5057   3
   1  -2 -10 31.5821 24.9420  16
   1  -2 -10-2.56017 20.5953   2
   1   2 -10 5.33447 20.0960  19
   1  -2 -11 68.6600 19.5544  26
   1   2 -11 77.3382 21.8349   3
   1  -2 -11 70.8608 28.8327  16
   1  -2 -11 68.9029 23.1904   2
   1   2 -12 83.0882 26.4316   3
   1  -2 -12 115.841 23.1147  26
   1  -2 -12 95.6191 33.6856  16
   1  -2 -12 102.044 27.1320   2
   1  -2 -13 1253.92 54.7449  26
   1  -2 -13 1214.47 76.3240  16
   1   2 -13 1115.57 65.5566   4
   1  -2 -13 1168.08 61.1699   8
   1  -2 -14 37.2968 21.0403  26
   1  -2 -14 84.6211 28.9099   8
   1  -2 -15 136.445 23.9408  26
   1  -2 -15 98.3745 27.1752   8
   1  -2 -16 130.282 23.1345  26
   1  -2 -16 144.613 29.4147   8
   1  -2 -17 90.7588 25.7502   8
   1  -2 -17 72.9428 20.7819  26
   1  -2 -18 135.964 21.1374  26
   1  -2 -18 93.4124 25.0773   8
   1  -2 -19 115.868 21.6571   8
   1  -2 -19 96.2881 17.7180  26
   1  -2 -20 93.6975 18.2939   8
  -1  -3 -19-7.44767 15.8993   8
  -1  -3 -18 225.946 25.2718   8
   1  -3  17-10.1658 23.5316  29
  -1  -3 -17 1.96243 21.1687   8
   1  -3  16 191.276 29.6705  29
  -1  -3 -16 209.286 29.3666   8
  -1  -3 -15 193.619 30.0725   8
   1  -3  15 168.585 29.7554  29
   1  -3  14 82.5920 26.3771  29
  -1  -3 -14 31.9831 24.1507   8
  -1  -3 -13 927.120 52.3703   8
  -1   3 -13 896.062 42.5585  22
   1  -3  13 810.251 48.0334  29
  -1  -3 -12 148.202 29.6129   8
   1  -3  12 126.342 27.1480  29
   1  -3  11 313.998 30.3558  29
  -1  -3 -11 300.551 33.5272   8
  -1  -3 -10 475.796 35.3494   8
   1  -3  10 388.944 31.3762  29
  -1  -3  -9 2393.97 98.1273  11
   1  -3   9 2495.91 89.2641  29
  -1  -3  -9 2365.09 92.7793   8
  -1  -3  -8 4832.06 156.240  25
  -1  -3  -8 4967.94 161.054   8
  -1  -3  -8 4825.72 166.729  11
   1  -3   8 4579.37 156.687  29
   1  -3   7 464.738 34.9947  18
  -1  -3  -7 494.170 35.2616  11
  -1  -3  -6 99.7106 21.0808  11
   1  -3   6 61.4168 19.1097  18
  -1  -3  -6 117.754 24.1672   1
   1  -3   5 3051.28 110.607  18
  -1  -3  -5 3090.04 110.642  11
  -1  -3  -5 3040.90 113.304   1
  -1  -3  -4 1430.42 66.7343   1
   1  -3   4 1513.50 63.9873  18
  -1  -3  -3 143.607 21.8472   1
  -1  -3  -3 152.920 20.9665  11
   1  -3   3 89.7176 18.5840  18
   1  -3   3 145.093 30.1260   5
  -1  -3  -2 1266.87 58.6981   6
   1  -3   2 1323.07 64.1698   5
  -1  -3  -2 1257.39 53.7871  11
   1  -3   2 1229.45 53.0341  18
  -1  -3  -2 1217.91 57.4102   1
  -1  -3  -1 3483.72 117.017  15
  -1  -3  -1 3195.02 115.798  11
  -1  -3  -1 3282.74 121.904   6
  -1  -3  -1 3298.93 123.335   1
   1  -3   1 3601.62 117.425  18
   1  -3   1 3575.32 126.416   5
   1  -3   0 94.4628 25.3886   1
  -1  -3   0 163.115 21.0456  15
  -1  -3   0 109.481 26.3978   1
  -1  -3   0 137.323 25.1671   6
   1  -3   0 133.229 19.5797  18
  -1  -3   0 114.781 27.3630   5
   1  -3   0 202.794 30.6843   5
   1  -3   0 99.4073 26.3829   6
   1  -3  -1 3194.19 111.721  18
  -1  -3   1 3349.46 114.562  15
   1  -3  -1 3228.02 119.357   1
   1  -3  -1 3398.47 119.849   6
  -1  -3   1 3231.74 121.409   5
  -1  -3   2 1277.61 62.7422   5
   1  -3  -2 1289.03 58.6975   6
   1  -3  -2 1258.00 59.5709   1
  -1  -3   3 152.164 27.9908   5
   1  -3  -3 86.2018 22.2000   1
   1  -3  -4 1443.39 64.9701   1
   1  -3  -5 3252.24 120.217   1
   1  -3  -6 128.735 30.7136  16
   1  -3  -6 85.0281 22.7256   1
  -1  -3   7 333.996 29.2841  15
   1  -3  -7 407.486 39.5929  16
   1  -3  -8 5188.01 184.071  16
   1   3  -8 4937.66 162.044  22
  -1  -3   8 5043.09 165.669  29
   1  -3  -8 5108.53 168.636   8
   1  -3  -9 2374.88 83.7770  25
   1   3  -9 2270.39 82.7590  22
   1  -3  -9 2339.78 104.491  16
  -1  -3   9 2260.43 85.7741  29
   1  -3  -9 2327.61 89.8598   8
   1  -3 -10 435.056 44.7303  16
   1   3 -10 406.293 28.3633  22
  -1  -3  10 415.380 32.9861  29
   1  -3 -10 427.024 37.1496   8
  -1  -3  11 413.080 33.5824  29
   1   3 -11 445.020 30.6735  22
   1  -3 -11 514.758 39.5347   8
   1  -3 -11 481.808 48.5979  16
   1   3 -12 104.404 21.3302  22
   1  -3 -12 72.5659 28.9760   8
  -1  -3  12 128.964 27.3711  29
   1   3 -13 972.402 46.0189  22
   1  -3 -13 960.712 53.4865   8
   1   3 -14 71.7010 18.6007  22
   1  -3 -14 132.602 29.6799   8
   1  -3 -15 166.875 30.2897   8
  -1  -3  16 136.167 27.2361  24
   1  -3 -16 210.954 29.0371   8
   1  -3 -17 15.7915 22.1444   8
  -1  -3  17 81.5875 26.4690  37
  -1  -3  18 208.238 28.5991  37
   1  -3 -18 192.771 24.7690   8
  -1  -3  19 17.4107 20.2442  37
   1  -3 -19-7.47152 15.5010   8
   1  -4  18 27.9173 17.1145  24
   1  -4  18 17.1862 16.1391  29
   1  -4  17 141.032 22.4918  29
  -1  -4 -17 134.331 20.3284   8
  -1  -4 -16 30.2032 20.4759   8
   1  -4  16-17.6794 20.2444  29
   1  -4  15 13.7262 22.0703  29
  -1  -4 -15 28.6819 22.6409   8
  -1   4 -15 22.5033 15.8364  22
  -1  -4 -14 274.222 31.4336   8
   1  -4  14 235.273 28.7870  29
  -1   4 -14 252.842 23.8272  22
  -1   4 -13 58.8731 19.0866  22
   1  -4  13 44.8137 25.0980  29
  -1  -4 -13 23.7135 24.6626   8
  -1   4 -12 268.800 26.6667  22
  -1  -4 -12 305.357 33.7943   8
   1  -4  12 339.301 31.7049  29
  -1  -4 -11 256.490 32.1258   8
   1  -4  11 216.262 29.8775  29
   1  -4  10 348.704 31.3979  29
  -1  -4 -10 283.210 35.4988   8
   1  -4   9 195.604 27.0428  29
  -1  -4  -9 183.546 31.7716   8
   1  -4   9 194.174 46.8528   5
   1  -4   8 277.997 27.6442  29
   1  -4   8 345.170 50.0217   5
   1  -4   8 268.177 32.9618  18
  -1  -4  -8 231.023 23.8145  25
  -1  -4  -8 278.961 33.9221   8
   1  -4   7 510.328 40.0781  18
  -1  -4  -7 497.384 31.3658  25
   1  -4   7 517.433 34.0452  29
  -1  -4  -7 488.111 40.7186   8
   1  -4   7 494.580 53.6272   5
   1  -4   6 143.689 36.7785   5
  -1  -4  -6 115.560 20.3182  25
   1  -4   6 135.051 25.5526  18
  -1  -4  -6 88.8051 24.0985   1
  -1  -4  -6 98.3761 28.9122   8
  -1  -4  -5 584.061 34.0135   7
  -1  -4  -5 511.340 41.6861   1
   1  -4   5 518.277 38.8722  18
  -1  -4  -5 549.368 31.6884  25
  -1  -4  -5 550.953 40.8661   8
   1  -4   5 442.559 51.4990   5
   1  -4   4 1111.52 56.8158  18
   1  -4   4 1176.13 70.0419   5
  -1  -4  -4 1062.10 48.7520   7
  -1  -4  -4 1023.86 58.9688   1
  -1  -4  -4 1141.18 47.6296  25
   1  -4   3 72.4070 23.1852  25
   1  -4   3 84.8560 21.2858  18
  -1  -4  -3 95.2769 23.0985   7
  -1  -4  -3 90.2076 25.1188   1
   1  -4   3 90.3160 32.9088   5
  -1  -4  -2 181.648 29.6178   1
   1  -4   2 266.515 34.6525   1
   1  -4   2 167.885 33.2187   6
   1  -4   2 216.430 25.8731  18
   1  -4   2 277.188 37.3494   5
   1  -4   1 1127.40 54.2563  18
  -1  -4  -1 1107.90 62.1859   1
   1  -4   1 1204.52 65.6033   1
   1  -4   1 1176.44 64.0055   6
  -1  -4  -1 1046.05 59.6153   6
  -1  -4   0 98.5410 26.6918   1
  -1  -4   0 78.0540 20.7191  15
   1  -4   0 80.2253 25.9715   1
  -1  -4   0 44.0385 27.1069   6
   1  -4   0 58.2241 27.8696   6
  -1  -4   1 1206.50 64.3916   1
   1  -4  -1 1125.20 61.9178   6
  -1  -4   1 1080.02 63.6307   6
   1  -4  -1 1227.42 65.2264   1
  -1  -4   1 1284.42 58.9354  15
   1  -4  -2 167.492 29.0133   1
  -1  -4   2 192.561 31.7659   1
   1  -4  -2 207.306 29.6764   6
  -1  -4   2 199.396 33.6103   6
  -1  -4   2 219.150 33.8857   5
  -1  -4   2 128.666 23.0928  15
  -1  -4   3 63.6607 21.9415  15
   1  -4  -3 45.3552 24.4708   1
   1  -4  -3 82.7080 21.3006  25
  -1  -4   3 22.9985 30.7484   5
   1  -4  -4 1098.51 61.4810   1
  -1  -4   4 1100.38 58.6609  15
  -1  -4   4 1244.72 52.8498  29
   1  -4  -4 1169.17 50.8967   7
   1  -4  -4 1161.01 50.8730  25
  -1  -4   4 1094.05 68.1719   5
  -1  -4   4 1201.37 54.5185  37
   1  -4  -5 498.840 40.1476   1
   1  -4  -5 580.522 33.4454  25
  -1  -4   5 493.920 50.5411   5
  -1  -4   5 532.730 37.6593  37
  -1  -4   5 529.853 35.3146  29
   1  -4  -5 540.937 32.9793   7
   1  -4  -5 577.322 41.5589   8
  -1  -4   5 587.336 40.7302  15
   1  -4  -6 146.718 22.5895  25
   1   4  -6 123.907 18.6956  22
  -1  -4   6 134.193 24.2481  15
  -1  -4   6 99.7797 25.9005  37
  -1  -4   6 126.834 24.4957  29
   1  -4  -6 74.6048 23.9667   1
   1  -4  -6 124.230 30.2252   8
  -1  -4   6 177.145 41.5061   5
  -1  -4   7 565.209 41.4704  15
  -1  -4   7 565.161 35.9723  29
   1  -4  -7 535.423 33.1552  25
   1   4  -7 477.801 29.5760  22
   1  -4  -7 551.721 40.8576   8
  -1  -4   7 479.772 37.7848  37
   1  -4  -8 253.466 25.2525  25
   1   4  -8 227.676 23.2023  22
  -1  -4   8 231.747 31.2977  37
  -1  -4   8 245.888 27.5738  29
  -1  -4   8 280.255 47.0099   5
   1  -4  -8 197.048 33.0508   8
   1  -4  -9 220.140 24.8370  25
  -1  -4   9 213.356 32.6063  37
  -1  -4   9 201.374 27.6474  29
   1   4  -9 216.602 23.5315  22
   1  -4  -9 270.348 34.2381   8
  -1  -4   9 187.301 40.6804   5
  -1  -4  10 350.623 36.8020  37
   1   4 -10 347.521 27.9088  22
  -1  -4  10 365.898 32.3775  29
   1  -4 -10 393.483 37.8958   8
  -1  -4  11 181.643 30.9902  37
   1  -4 -11 199.986 33.7341   8
   1   4 -11 214.341 25.1272  22
  -1  -4  11 233.666 28.7790  29
  -1  -4  12 255.380 34.0232  37
  -1  -4  12 351.456 32.2078  29
   1  -4 -12 319.428 36.6012   8
   1   4 -12 332.575 28.2910  22
   1   4 -13 49.1381 18.6910  22
  -1  -4  13 38.8798 25.9126  37
   1  -4 -13 41.2900 27.5356   8
  -1  -4  13 31.3626 22.6414  29
  -1  -4  14 174.542 28.8698  37
  -1  -4  14 270.247 30.2068  24
  -1  -4  14 262.168 29.2077  29
   1  -4 -14 212.737 31.1883   8
  -1  -4  15 38.0213 23.0763  24
  -1  -4  15 20.3448 21.5126  29
  -1  -4  15 36.0193 23.8708  37
   1  -4 -15 20.7187 21.9798   8
  -1  -4  16 17.1761 20.8881  24
  -1  -4  16 5.05378 21.2397  37
   1  -4 -16 12.5107 21.7140   8
  -1  -4  17 158.436 23.1326  24
   1  -4 -17 115.902 20.5749   8
   1  -5  16 35.2687 14.4270  24
   1  -5  16-1.04857 13.6455  29
  -1   5 -15 38.4107 12.4731  22
   1  -5  15 37.6330 17.3346  29
   1  -5  15 40.6103 17.7537  24
  -1   5 -14 139.667 17.6770  22
   1  -5  14 163.643 22.1122  29
  -1   5 -13 98.0243 17.9119  22
   1  -5  13 113.247 22.6543  29
  -1   5 -12 574.208 32.6944  22
   1  -5  12 549.071 35.3313  29
  -1   5 -11 48.3996 18.6365  22
   1  -5  11 65.2770 22.8455  29
  -1   5 -10 49.2829 18.3595  22
   1  -5  10 63.7395 22.0333  29
  -1   5  -9 123.380 19.8568  22
   1  -5   9 164.904 27.1365  25
   1  -5   9 113.429 24.1140  29
  -1  -5  -8 74.2676 19.6477  25
   1  -5   8 111.484 26.7829  25
  -1   5  -8 80.5702 17.8687  22
   1  -5   7 81.3030 25.4990  25
  -1  -5  -7 66.9471 20.5032  25
   1  -5   6 11.2953 25.0149  25
  -1  -5  -6 8.73047 18.0871  25
   1  -5   5 395.818 35.2311  25
  -1  -5  -5 395.039 30.2052  25
   1  -5   4 836.945 67.7437   5
   1  -5   4 884.293 66.5450   6
   1  -5   4 862.462 48.1777  25
  -1  -5  -4 901.301 44.9630   7
  -1  -5  -4 878.778 43.6233  25
   1  -5   3 65.7631 29.2267   6
   1  -5   3 41.1201 26.9384   7
  -1  -5  -3 47.3978 22.0330   7
   1  -5   3 60.6166 31.1917   1
   1  -5   3 59.9099 23.9631  25
   1  -5   2 12.4826 21.6661  25
  -1  -5  -2 1.84789 21.6170   7
   1  -5   2 8.37769 24.0899   7
   1  -5   2 53.9533 29.9192   6
   1  -5   2 34.0053 29.0528   1
  -1  -5  -2 4.14777 24.6094   1
   1  -5   1 151.724 35.4437   6
   1  -5   1 83.4148 27.1688   1
   1  -5   1 196.834 27.9446   7
  -1  -5  -1 161.751 26.1836   7
  -1  -5  -1 135.236 31.1751   1
   1  -5   1 155.798 24.5875  25
   1  -5   0-8.39033 27.9139   6
  -1  -5   0-26.1231 26.4457   1
  -1  -5   0-1.92740 21.7817   7
   1  -5   0-7.87932 23.7452   7
  -1  -5   0 4.07021 26.2001   6
   1  -5   0-7.89670 20.9290  25
   1  -5   0 13.4442 23.3917   1
   1  -5  -1 200.395 33.6758   1
  -1  -5   1 164.720 27.2832   7
   1  -5  -1 199.544 28.2431   7
  -1  -5   1 121.519 31.9557   6
   1  -5  -1 188.746 24.9496  25
  -1  -5   1 116.933 30.8944   1
   1  -5  -2 22.5515 23.1832   7
  -1  -5   2 32.7903 27.1118   1
   1  -5  -2 22.8330 20.4299  25
  -1  -5   2 6.14991 23.6803   7
  -1  -5   2 17.4346 27.0827   6
   1  -5  -2 8.48896 23.0641   1
  -1  -5   2 7.19390 21.3431  15
  -1  -5   3 51.5707 19.8709  15
   1  -5  -3 88.6507 24.1429   7
  -1  -5   3 40.3041 25.0560   7
  -1  -5   3 13.6726 27.2910   6
   1  -5  -3 34.0129 20.3340  25
   1  -5  -3 62.8651 27.1994   1
   1  -5  -4 885.331 44.7978   7
  -1  -5   4 783.998 53.7939  15
  -1  -5   4 811.087 64.4902   6
  -1  -5   4 857.069 68.2034   5
  -1  -5   4 946.625 46.4388  29
   1  -5  -4 859.010 44.7644  25
  -1  -5   5 462.705 34.1624  29
   1  -5  -5 506.553 33.7663  25
   1  -5  -6 22.2405 20.3357  25
  -1  -5   6 8.12292 21.4238  29
  -1  -5   7 26.8340 23.8756  29
   1  -5  -7 57.0778 20.1925  25
  -1  -5   8 95.0801 24.6058  29
   1   5  -8 56.1611 18.0175  22
   1  -5  -8 65.1689 20.1911  25
  -1  -5   9 125.852 24.0629  24
  -1  -5   9 133.025 25.0738  29
   1   5  -9 154.777 20.5955  22
   1  -5  -9 148.329 21.6574  25
  -1  -5  10 89.1256 22.4641  24
   1   5 -10 53.9267 18.3740  22
  -1  -5  10 64.0352 23.4882  29
  -1  -5  11 53.7977 21.0642  24
  -1  -5  11 21.2104 20.6449  29
   1   5 -11 67.5383 19.5959  22
  -1  -5  12 465.479 33.2394  24
  -1  -5  12 428.857 31.7002  29
  -1  -5  13 179.884 23.5049  29
  -1  -5  13 197.798 24.7090  24
  -1  -5  14 152.665 22.6785  24
  -1  -5  14 174.177 21.7716  29
  -1  -5  15 59.6149 18.5743  24
  -1  -5  15 57.6464 17.3244  29
  -1  -5  16-13.0645 15.0841  24
   1  -6  13 95.7954 15.3465   7
   1  -6  13 110.380 14.1203  29
  -1   6 -12 59.3074 12.7133  22
   1  -6  12 74.1231 14.6945  29
   1  -6  12 63.9965 17.5519   7
  -1   6 -11 10.8567 12.0821  22
   1  -6  11 15.8521 18.1060   7
  -1   6 -10 28.2722 13.4707  22
   1  -6  10 52.0990 20.8058   7
   1  -6   9 202.026 27.0639   7
   1  -6   8 287.489 29.6187   7
   1  -6   7 77.2188 22.0277  25
   1  -6   7 169.031 26.9036   7
   1  -6   6 607.940 39.8021   7
  -1  -6  -6 619.312 33.9240  25
   1  -6   6 513.217 36.7166  25
  -1  -6  -5 84.5550 18.9962  25
   1  -6   5 116.417 23.3082  25
   1  -6   5 94.7656 25.6438   7
   1  -6   4 38.7661 22.3478  25
   1  -6   4 23.1962 23.7426   7
   1  -6   3 1112.47 55.3305   7
   1  -6   3 1101.01 53.0811  25
   1  -6   2 1477.03 64.8729   7
   1  -6   2 1557.58 64.8004  25
  -1  -6  -2 1425.71 62.4517   7
  -1  -6  -1 238.824 26.7181   7
   1  -6   1 182.154 28.0837   7
   1  -6   1 147.607 24.5749  25
   1  -6   0 51.8387 21.7873  25
   1  -6   0-1.97808 21.6159   7
  -1  -6   0 44.7415 21.5592   7
  -1  -6   1 149.391 26.7089   7
   1  -6  -1 133.050 25.4303   7
   1  -6  -1 192.009 25.3571  25
  -1  -6   2 1373.35 60.3138   7
   1  -6  -2 1267.13 57.1397  25
   1  -6  -2 1294.56 58.6453   7
  -1  -6   3 1178.19 56.2452   7
   1  -6  -3 1159.66 53.0291  25
   1  -6  -4 49.1764 20.2234  25
  -1  -6   4 53.9404 25.0536   7
  -1  -6   5 66.1195 23.3691   7
   1  -6  -5 91.3544 19.6883  25
  -1  -6   6 547.360 34.5524  29
  -1  -6   6 508.753 36.9243   7
   1  -6  -6 557.260 33.1028  25
  -1  -6   7 119.528 21.5303  29
   1  -6  -7 168.703 21.3311  25
  -1  -6   7 146.578 26.1937   7
  -1  -6   8 248.670 24.7849  29
  -1  -6   8 295.928 29.6196   7
   1  -6  -8 324.221 24.1788  25
  -1  -6   9 185.232 26.0854   7
  -1  -6   9 249.212 23.6881  29
  -1  -6  10 26.9769 16.3331  29
  -1  -6  10 54.4432 19.0396   7
  -1  -6  11 16.5118 16.8609   7
  -1  -6  11 71.8281 17.1990  29
  -1  -6  12 83.2987 16.0467  29
  -1  -6  12 44.8471 16.2636   7
  -1  -6  13 97.7074 15.6928   7
  -1  -6  13 90.9833 14.4264  29
   1  -7   8 339.439 21.7014   7
   1  -7   7 40.7591 14.9274   7
   1  -7   6 135.485 18.2859   7
   1  -7   5 61.8656 15.1451  25
   1  -7   5 49.1828 16.9713   7
   1  -7   4 62.8411 15.4031  25
   1  -7   4 38.3326 16.9402   7
   1  -7   3 534.339 30.0769  25
   1  -7   3 580.727 31.5996   7
   1  -7   2 587.017 31.6431  25
   1  -7   2 650.431 33.5256   7
   1  -7   1 190.137 20.3291  25
   1  -7   1 183.250 21.3851   7
   1  -7   0 31.9164 15.7102  25
  -1  -7   1 230.573 22.6759   7
   1  -7  -1 262.810 22.1081  25
  -1  -7   2 611.544 33.1054   7
   1  -7  -2 610.419 31.6637  25
  -1  -7   3 461.064 28.5937   7
   1  -7  -3 458.747 27.2652  25
  -1  -7   4 25.9484 15.9987   7
   1  -7  -4 35.5461 14.1564  25
   1  -7  -5 39.1136 13.4706  25
  -1  -7   5 33.2561 15.9211   7
  -1  -7   6 144.207 18.0447   7
   1  -7  -6 125.436 15.3692  25
  -1  -7   7 57.0283 14.2480   7
  -1  -7   8 307.055 20.1827   7
  -2   0 -20 28.1051 14.0344  31
  -2   0 -19-8.64741 15.0359  26
  -2   0 -19 5.95334 16.4675  31
  -2   0 -18 274.645 24.4602  26
  -2   0 -18 359.740 27.6543  31
  -2   0 -17-25.3485 20.9477  31
  -2   0 -17 11.6666 18.0223  26
  -2   0 -16 27.0966 22.6786  31
  -2   0 -16 51.1644 18.0710  36
  -2   0 -15-1.62309 16.9024  36
  -2   0 -15-24.1638 23.4080  31
  -2   0 -14 698.602 39.1277  34
  -2   0 -14 637.561 36.0072  36
  -2   0 -13 27.3177 19.8190  34
  -2   0 -13 3.31764 22.0747   9
  -2   0 -13-17.9122 17.2760  36
  -2   0 -12 787.314 39.1181  36
  -2   0 -12 865.481 51.2297   9
  -2   0 -12 884.664 41.4341  34
  -2   0 -11 22.8071 16.6103  34
  -2   0 -11-1.24506 13.8203  36
  -2   0 -11 10.6189 20.2012   9
  -2   0 -10 1048.19 53.5947   9
   2   0  10 1091.32 55.2730  17
  -2   0  -9 4.09255 18.0446   9
   2   0   9 2.21746 19.1940  17
  -2   0  -8 2488.70 93.0840   9
   2   0   8 2583.02 94.8408  17
  -2   0  -7-12.5024 15.8839   9
   2   0   7 23.4606 17.1718  17
  -2   0  -6 8501.60 259.554  10
  -2   0  -6 8314.54 262.044   9
   2   0   6 8217.19 262.526  17
  -2   0  -5 7.60981 13.2840  10
   2   0   5 14.0028 14.9824  17
  -2   0  -5-1.26027 16.1981   9
  -2   0  -4 56.8909 13.9239  13
  -2   0  -4 29.9449 13.7417  10
  -2   0  -3 18.0495 12.7670  13
  -2   0  -3 4.57848 12.4030  10
  -2   0  -2 10350.4 316.722  20
  -2   0  -1 25.2318 15.4332  20
   2   0   0 4560.47 144.187  14
  -2   0   0 4577.48 146.386  20
   2   0  -1 5.57298 9.93145  19
   2   0  -1 10.8410 14.4558  14
   2   0  -2 11205.2 339.438  14
   2   0  -2 11035.0 337.147  19
   2   0  -3 3.86306 13.2015  19
   2   0  -3 22.6724 16.5860  14
   2   0  -4 45.2584 16.0444  19
   2   0  -4 53.5296 16.8049  14
   2   0  -5 1.42964 16.2287  14
   2   0  -5 11.0334 16.3641  19
   2   0  -6 8744.72 272.498  19
   2   0  -6 8498.57 271.577  14
   2   0  -7 5.70645 17.4374  19
   2   0  -7 17.9351 17.5171  14
   2   0  -7 11.8486 16.9259  12
   2   0  -8 2911.12 102.572  12
   2   0  -8 3026.06 108.215  19
   2   0  -8 2698.95 105.227  14
   2   0  -9-8.96099 16.8778  14
   2   0  -9 16.6334 16.8242  12
   2   0  -9-2.56855 20.2957  19
   2   0 -10 981.043 48.8757  12
   2   0 -10 958.587 55.5339  19
   2   0 -11 11.4421 17.8366  26
   2   0 -11-3.38854 24.7512  19
   2   0 -11-11.6794 19.5174  12
   2   0 -11 9.56354 18.5559  31
   2   0 -12 801.775 40.8339  31
   2   0 -12 777.738 41.1593  26
   2   0 -13-8.57488 28.3443  19
   2   0 -13-4.86736 20.9234  31
   2   0 -13 22.5568 20.4200  26
   2   0 -14 529.907 36.2653  31
   2   0 -14 526.640 36.2447  26
   2   0 -15-9.77004 22.1311  26
   2   0 -15 5.38453 23.1463  31
   2   0 -16 48.5657 22.5101  31
   2   0 -16 39.3852 22.5377  26
   2   0 -17-11.3610 20.6327  26
   2   0 -17-31.0091 22.7493  31
   2   0 -18 251.268 26.8219  26
   2   0 -19-13.1364 17.7014  26
   2   0 -20 36.4156 15.1093  26
  -2  -1 -20 185.318 17.1501  31
  -2   1 -20 182.557 17.5571  31
  -2   1 -20 186.770 18.4939  26
  -2   1 -19 183.868 20.6959  26
  -2   1 -19 212.533 20.6603  31
  -2  -1 -19 202.416 20.4618  31
  -2   1 -18 62.4241 20.7136  31
  -2   1 -18 51.9835 18.7846  26
  -2  -1 -18 49.9131 18.8186  31
  -2   1 -17 436.664 31.3039  31
  -2  -1 -17 473.550 30.7121  31
  -2   1 -17 404.707 28.3735  36
  -2   1 -16 101.315 23.7191  31
  -2   1 -16 113.854 20.2899  36
  -2  -1 -16 127.858 23.9154  31
  -2  -1 -15 4674.65 158.240  34
  -2   1 -15 5007.94 159.418  31
  -2   1 -15 4547.74 156.450  36
  -2  -1 -15 4764.38 157.949  31
  -2   1 -14 3385.40 116.335  36
  -2  -1 -14 3395.70 118.030  34
  -2  -1 -13 2290.68 81.6662  36
  -2   1 -13 2455.96 82.8665  36
  -2  -1 -13 2398.77 83.5790  34
  -2   1 -13 2256.41 97.3579   9
  -2  -1 -12 34.4277 16.7857  36
  -2   1 -12 25.2292 17.5232  32
  -2  -1 -12 7.52521 17.6986  34
  -2   1 -12 21.3545 24.3399   9
   2  -1  12 53.1031 28.2409  17
  -2   1 -12 49.2308 16.9465  36
  -2   1 -11 2677.31 92.8699  36
  -2  -1 -11 2577.00 93.9563  34
  -2   1 -11 2729.86 94.6887  32
  -2   1 -11 2717.56 105.654   9
  -2  -1 -11 2665.33 104.241   9
   2  -1  11 2842.38 109.999  17
  -2  -1 -11 2775.79 93.2513  36
  -2   1 -10 3468.46 122.881   9
  -2  -1 -10 3215.58 120.843   9
   2  -1  10 3342.25 124.709  17
  -2   1  -9 12019.7 379.048   9
  -2  -1  -9 12154.6 378.173   9
   2  -1   9 12063.2 380.832  17
  -2  -1  -8 4247.02 142.560  11
  -2   1  -8 4183.45 143.810   9
   2  -1   8 4108.35 144.262  17
   2   1   8 4321.42 146.234  17
  -2   1  -7 182.118 21.6207   9
   2   1   7 209.642 24.3479  17
   2  -1   7 202.735 23.2961  17
  -2   1  -6 432.958 27.6853   9
   2  -1   6 423.007 28.8526  17
  -2   1  -5 25221.3 758.554   9
   2  -1   5 25129.3 758.293  17
  -2   1  -4 4976.99 163.543  13
  -2   1  -4 5025.61 161.414   9
   2  -1   4 5081.65 160.647  17
  -2   1  -3 1669.24 65.9586  13
   2  -1   3 1814.03 62.5083  17
   2  -1   2 2371.43 79.3995  17
  -2   1  -2 2230.77 84.0126  13
   2  -1   2 2504.08 87.3925  21
  -2  -1  -2 2375.94 80.5635  10
  -2   1  -1 90251.6 2691.49  20
   2  -1   1 89963.0 2692.19  21
  -2  -1  -1 90752.1 2686.19  10
   2  -1   1 90432.6 2684.11  17
  -2   1   0 190403. 5863.83  20
   2  -1   0 199739. 5864.80  21
  -2  -1   0 200419. 5857.88  10
  -2   1   1 86186.1 2541.06  20
  -2  -1   1 84878.6 2534.08  10
  -2   1   2 2001.78 75.6482  20
   2  -1  -2 1962.90 71.2057  19
  -2   1   3 1711.62 66.3587  20
   2  -1  -3 1620.49 62.6576  19
   2  -1  -4 5004.31 163.461  19
   2  -1  -5 25826.8 773.177  14
   2  -1  -5 25286.3 774.127  19
   2  -1  -6 407.938 30.2487  14
   2  -1  -6 486.677 33.0019  19
   2  -1  -7 177.555 23.4296  14
   2   1  -7 174.402 22.8987  12
   2  -1  -7 207.771 26.6277  19
   2   1  -7 181.974 23.3385  19
   2   1  -8 4275.94 144.612  12
   2  -1  -8 4347.34 151.534  19
   2   1  -8 4214.25 147.655  19
   2  -1  -8 4125.49 146.582  14
   2   1  -9 12444.1 398.398  19
   2   1  -9 12744.8 394.996  12
   2  -1  -9 12643.8 403.664  19
   2   1 -10 3505.72 125.433  12
   2  -1 -10 3420.27 133.913  19
   2   1 -10 3419.86 129.313  19
   2   1 -11 2615.64 107.789  19
   2   1 -11 2626.05 102.586  12
   2  -1 -11 2631.98 91.8820  31
   2   1 -11 2626.50 92.8849  31
   2  -1 -11 2619.57 93.7367  26
   2  -1 -12 43.2958 20.1346  26
   2  -1 -12 4.35059 19.6587  31
   2   1 -12 44.2409 21.4307  31
   2   1 -12 43.7625 24.7459  19
   2  -1 -13 2314.51 84.9354  31
   2   1 -13 2269.40 84.9699  31
   2   1 -13 2102.28 102.497  19
   2  -1 -13 2363.01 87.0422  26
   2   1 -14 3279.85 115.165  31
   2  -1 -14 3228.94 113.851  31
   2  -1 -14 3291.72 116.555  26
   2  -1 -15 4483.89 153.558  31
   2   1 -15 4638.76 155.035  31
   2  -1 -15 4685.48 156.870  26
   2  -1 -16 93.8040 23.1463  31
   2   1 -16 90.0099 24.1958  31
   2  -1 -16 122.905 24.5432  26
   2  -1 -17 415.485 30.7241  31
   2   1 -17 396.358 31.0233  31
   2  -1 -17 492.383 34.1808  26
   2  -1 -18 25.4511 20.2661  26
   2  -1 -19 183.668 21.5524  26
  -2  -1  20 158.679 26.0719  39
   2  -1 -20 149.957 17.8599  26
  -2   2 -20 34.6823 12.7152  26
  -2   2 -19 15.7912 14.8237  26
   2  -2  17-4.36510 24.2224  29
  -2  -2 -16 714.159 36.9559  34
  -2   2 -16 678.695 35.6408  36
   2  -2  16 718.408 46.1220  29
  -2   2 -15 218.507 23.0469  36
  -2  -2 -15 276.049 25.1930  34
   2  -2  15 201.356 32.3514  29
  -2   2 -14 109.612 19.1194  36
  -2  -2 -14 94.4383 21.1074  34
  -2   2 -13 678.356 35.9960  36
  -2  -2 -13 708.386 38.2308  34
  -2  -2 -12 111.648 20.5867  34
  -2   2 -12 84.6701 18.0755  36
  -2   2 -12 59.3196 19.0287  32
  -2   2 -11 1121.80 52.8165  32
  -2  -2 -11 1404.60 53.5362  34
  -2   2 -11 1308.88 51.6844  36
   2  -2  11 1198.55 67.0947  17
  -2  -2 -10 18.7007 16.0985  34
  -2   2 -10 38.5865 16.9469  32
  -2   2 -10 32.6915 16.0205  36
   2  -2  10 53.8825 26.7015  17
  -2  -2  -9 33.2721 14.5293  34
  -2   2  -9 22.6571 14.9533  32
  -2  -2  -9 21.9378 18.2937  11
   2  -2   9 57.5145 25.1616  17
  -2  -2  -8 389.643 30.6410  11
   2  -2   8 366.129 32.1275  17
  -2  -2  -7 6413.52 202.105  11
   2  -2   7 5736.91 203.753  18
   2  -2   7 6167.89 201.323  17
  -2  -2  -6 154.618 21.4526  11
   2  -2   6 140.113 21.0256  17
  -2  -2  -5 95.5268 18.1872  11
   2  -2   5 61.3408 18.3422  17
  -2  -2  -4 5141.39 170.738  11
  -2   2  -4 5342.60 173.252  13
   2  -2   4 5219.70 168.815  17
  -2   2  -3 1730.38 67.1662  13
  -2  -2  -3 1668.72 63.8605  11
   2  -2   3 1577.33 61.3417  17
  -2  -2  -2 68.0517 14.6211  11
  -2   2  -2 62.3581 18.4200  13
  -2   2  -1 261.625 25.1425  13
   2  -2   1 299.920 30.6343  21
  -2  -2  -1 202.094 19.3827  11
   2  -2   0 1560.86 65.3762  21
  -2  -2   0 1507.09 58.7123  15
  -2  -2   0 1482.61 56.2353  11
  -2  -2   1 183.444 19.1996  15
   2  -2  -1 170.093 26.3976  21
  -2   2   1 231.209 24.4207  20
  -2  -2   2 52.7835 15.8892  15
   2  -2  -2 64.7885 21.4909  21
  -2   2   2 114.690 21.1551  20
   2  -2  -3 1691.91 69.4670  16
  -2  -2   3 1661.79 65.7556  15
   2  -2  -3 1736.34 71.5953  21
  -2   2   3 1741.10 69.4298  20
   2  -2  -4 5395.20 175.182  16
  -2  -2   4 5119.72 170.440  15
   2  -2  -4 5455.86 175.179  21
  -2   2   4 4895.13 172.474  20
  -2  -2   5 88.3698 17.3353  15
   2  -2  -5 70.6012 20.7379  21
   2  -2  -5 32.9134 21.1998  16
  -2  -2   6 86.2718 16.5286  15
   2   2  -6 130.138 21.2626  12
   2  -2  -6 129.532 23.5879  21
   2  -2  -6 134.519 25.5521  16
   2   2  -7 6295.85 201.746  12
   2  -2  -7 5771.70 204.818  21
   2  -2  -7 6358.47 210.007  16
   2   2  -8 389.325 31.6300  12
   2  -2  -8 362.860 37.3860  16
   2  -2  -9 24.4548 28.3589  16
   2   2  -9 32.5816 21.6315  12
   2  -2  -9 32.6686 20.4001  26
   2   2  -9 14.2669 24.2392  19
   2  -2 -10 27.4534 26.9285  16
   2   2 -10 15.4898 20.7793  12
   2  -2 -10 28.5927 21.4537  26
   2   2 -10 27.3989 15.7033  22
   2   2 -10 22.0100 23.8179  19
   2   2 -11 1615.74 75.6379  19
   2   2 -11 1480.27 69.5460  12
   2  -2 -11 1522.92 80.5736  16
   2  -2 -12 66.5929 31.5417  16
   2   2 -12 87.2353 27.5179  19
   2  -2 -12 89.0895 23.2949  26
   2  -2 -13 665.709 39.3081  26
   2  -2 -14 74.4257 23.8490  26
   2  -2 -15 186.143 26.0304  26
   2  -2 -16 671.806 39.8126  26
   2  -2 -17 66.9261 21.6471  26
   2  -2 -18 31.0913 18.2493  26
  -2  -2  19 45.5984 24.3095  37
  -2  -2  20 5.82065 20.6566  37
  -2   3 -18 178.646 19.0611  26
   2  -3  18 218.815 25.0807  29
   2  -3  17 11.2320 22.2573  29
   2  -3  16 102.100 25.3471  29
   2  -3  15 1973.35 81.4557  29
  -2  -3 -14 2326.87 87.0625  34
   2  -3  14 2556.98 95.4572  29
  -2  -3 -13 596.152 34.4442  34
   2  -3  13 615.156 40.9147  29
   2  -3  12 366.946 33.7514  29
  -2  -3 -12 393.355 28.6282  34
  -2  -3 -11 2066.12 75.7001  34
   2  -3  11 1915.86 79.1925  29
  -2  -3 -10 717.151 36.4948  34
  -2  -3 -10 738.838 48.7522  11
   2  -3  10 638.561 39.8518  29
  -2  -3  -9 2242.61 82.4718  34
  -2  -3  -9 2359.99 97.0783  11
   2  -3   9 2318.90 84.6866  33
   2  -3   8 399.366 28.2606  33
  -2  -3  -8 427.262 27.4088  34
  -2  -3  -8 391.171 35.1289  11
  -2  -3  -7 581.043 31.3151  34
   2  -3   7 601.439 42.7243  18
   2  -3   7 616.927 32.6344  33
  -2  -3  -6 788.784 44.7547  11
   2  -3   6 724.134 44.8355  18
  -2  -3  -5 4620.02 160.570  11
   2  -3   5 4745.87 163.771  18
  -2  -3  -4 7336.38 239.992  11
   2  -3   4 7451.61 242.319  18
  -2  -3  -3 29.7110 17.1751  11
   2  -3   3 104.043 20.0153  18
  -2   3  -2 199.590 26.1738  13
  -2  -3  -2 218.612 25.8455  11
   2  -3   2 227.895 26.0296  18
  -2  -3  -1 4333.58 150.743  15
  -2   3  -1 4500.80 153.554  13
   2  -3   1 4530.88 151.489  18
  -2  -3   0 12799.0 388.326  15
   2  -3   0 12070.1 386.265  18
  -2  -3   1 4998.28 168.941  15
  -2  -3   2 199.741 24.8643  15
   2  -3  -3 33.9784 21.9522  21
  -2  -3   3 35.9528 17.3783  15
   2  -3  -4 8257.14 266.967  21
  -2  -3   4 7973.39 263.302  15
  -2  -3   5 4064.86 151.191  15
   2  -3  -5 4347.90 159.296  16
  -2  -3   6 745.710 44.8443  15
   2  -3  -6 834.599 52.6607  16
  -2  -3   7 603.364 35.8044  29
   2   3  -7 583.644 32.2654  22
   2  -3  -7 703.311 49.5193  16
  -2  -3   7 577.220 39.0152  37
  -2  -3   7 645.386 41.2119  15
   2  -3  -8 394.181 42.5610  16
   2   3  -8 367.368 26.0592  22
  -2  -3   8 459.169 32.6161  29
   2   3  -9 2230.64 83.8378  22
  -2  -3   9 2424.40 87.4347  29
   2  -3  -9 2255.04 104.521  16
   2   3 -10 805.129 40.1159  22
   2   3 -10 868.114 54.9923  19
   2  -3 -10 779.889 42.3359  26
   2  -3 -10 692.952 58.1406  16
   2   3 -11 2214.94 81.8368  22
   2   3 -11 2116.27 98.7394  19
  -2  -3  11 2213.17 86.7062  24
   2  -3 -11 2097.88 83.2957  26
   2  -3 -11 2316.57 110.440  16
  -2  -3  12 505.859 38.3549  24
   2  -3 -12 442.322 35.1193  26
  -2  -3  13 682.612 42.8377  24
   2  -3 -13 698.105 40.5618  26
  -2  -3  14 2632.15 100.941  24
  -2  -3  15 1879.98 77.5638  24
  -2  -3  16 101.370 27.9282  37
  -2  -3  17 69.3238 26.7308  37
  -2  -3  18 202.111 27.1482  37
  -2  -3  19 584.961 34.5770  37
   2  -4  17 40.4670 17.3849  29
   2  -4  16 18.8557 19.1330  29
  -2   4 -15 402.447 24.6982  22
   2  -4  15 373.280 30.3060  29
  -2   4 -14 36.6197 16.3366  22
   2  -4  14-19.1711 20.9844  29
  -2   4 -13 93.9682 19.4586  22
   2  -4  13 41.9734 23.6690  29
   2  -4  12 377.358 33.2932  29
   2  -4  11 334.979 31.0471  29
   2  -4  10 35.1595 22.7741  29
  -2  -4  -9 69.8755 18.6705  34
   2  -4   9 26.4276 21.9933  29
  -2  -4  -8 248.912 24.3451  34
   2  -4   8 283.808 34.5679  18
  -2  -4  -7 1812.98 69.8412  34
   2  -4   7 1874.75 85.7779  18
  -2  -4  -7 1875.54 85.3417  11
  -2  -4  -6 172.607 28.3085  11
   2  -4   6 123.823 25.4575  18
  -2  -4  -6 147.056 20.2567  34
  -2  -4  -5 9.14471 16.4228  34
  -2  -4  -5 40.0713 20.9179  11
   2  -4   5 53.3698 22.2040  18
  -2  -4  -4 110.837 25.1352  11
   2  -4   4 135.992 24.3742  18
  -2  -4  -4 126.475 19.8307  34
  -2  -4  -3 2246.98 82.2849  34
   2  -4   3 2307.61 92.7113  18
   2  -4   2 78.0622 23.1514  25
   2  -4   2 125.904 23.5859  18
  -2  -4  -2 126.783 23.9996  27
   2  -4   1 877.964 45.3230  25
   2  -4   1 845.874 47.5358  18
  -2  -4  -1 912.158 45.0767  27
  -2  -4   0 1556.74 60.3805  29
   2  -4   0 1436.95 62.3976  25
  -2  -4   0 1461.98 69.0547  15
  -2  -4   0 1555.43 62.6436  27
   2  -4  -1 881.370 44.4867  25
  -2  -4   1 846.586 50.2734  15
  -2  -4   1 916.170 46.1264  27
  -2  -4   1 996.941 44.8525  29
   2  -4  -2 109.584 23.4236  25
  -2  -4   2 121.268 22.1960  29
  -2  -4   2 122.753 23.8552  27
  -2  -4   2 78.6791 23.9112  15
  -2  -4   3 2033.92 90.4457  15
   2  -4  -3 2200.16 80.5057  25
  -2  -4   3 2138.25 81.2626  29
   2  -4  -4 133.195 21.1163  25
  -2  -4   4 127.834 23.3159  15
  -2  -4   4 127.487 22.8749  29
  -2  -4   4 162.721 28.0413  37
  -2  -4   5 39.5010 20.7851  15
   2  -4  -5 47.0215 20.1098  25
  -2  -4   5 38.0714 26.9289  37
  -2  -4   5 38.8784 22.2193  29
  -2  -4   6 65.8488 26.3241  37
  -2  -4   6 105.504 25.3828  15
  -2  -4   6 64.4695 23.1802  24
  -2  -4   6 113.117 25.0663  29
  -2  -4   7 1905.49 79.7004  37
  -2  -4   7 1860.62 75.4248  24
   2   4  -7 1820.94 71.0274  22
  -2  -4   7 1798.44 84.8174  15
  -2  -4   7 1907.37 75.5835  29
  -2  -4   8 255.182 33.0906  37
  -2  -4   8 244.846 29.1701  24
  -2  -4   8 210.306 28.5038  29
   2   4  -8 206.071 23.7065  22
  -2  -4   9 39.1007 24.3731  24
   2   4  -9 62.3591 19.0128  22
  -2  -4   9 47.0822 27.4575  37
  -2  -4   9 40.9530 23.4415  29
  -2  -4  10 68.5147 28.8117  37
   2   4 -10 58.4585 19.2391  22
  -2  -4  10 63.6618 23.3794  29
  -2  -4  10 55.4700 23.8259  24
  -2  -4  11 400.534 37.5653  37
  -2  -4  11 410.244 33.7105  24
  -2  -4  11 402.899 33.7671  29
  -2  -4  12 462.319 38.6171  37
  -2  -4  12 428.668 34.3757  24
  -2  -4  12 470.257 34.2064  29
  -2  -4  13 83.4904 27.1758  37
  -2  -4  13 58.9124 23.3380  24
  -2  -4  14-6.19158 23.8366  37
  -2  -4  14-6.23302 21.1177  24
  -2  -4  15 378.958 32.1001  24
  -2  -4  15 379.095 32.2270  37
  -2  -4  16 15.1414 19.1385  24
  -2  -4  16-18.3024 20.6357  37
  -2  -4  17-5.56582 18.8211  37
  -2  -4  17 45.2090 17.3738  24
  -2   5 -15 21.3337 10.5609  22
   2  -5  15 17.4893 14.2283  29
  -2   5 -14 61.9572 14.0970  22
   2  -5  14 70.2187 18.8133  25
   2  -5  14 82.0012 18.3827  29
   2  -5  13 14.5735 19.6334  25
  -2   5 -13-3.86534 14.1339  22
   2  -5  13 5.86324 17.4261  29
   2  -5  12 243.728 28.6419  25
  -2   5 -12 328.944 24.5673  22
   2  -5  12 279.815 26.5671  29
   2  -5  11 177.278 27.6789  25
  -2   5 -11 224.416 22.3312  22
   2  -5  10 719.974 44.1103  25
   2  -5   9 415.953 36.0725  25
   2  -5   8 154.876 28.8732  25
   2  -5   7 66.7629 26.1685  25
   2  -5   6 336.929 34.2390  25
   2  -5   5 1721.09 76.9962  25
  -2  -5  -5 1860.89 70.6107  34
   2  -5   4 4260.25 153.613  25
  -2  -5  -4 4472.52 146.792  34
   2  -5   3 1145.20 58.0545  25
  -2  -5  -3 1239.95 53.1461  34
   2  -5   2 1429.20 66.3362  25
  -2  -5  -2 1505.48 61.9921  34
   2  -5   1 401.836 34.5546  25
  -2  -5  -1 436.819 33.0765  27
   2  -5   0 2094.48 82.3325  25
  -2  -5   0 2058.18 81.7060  27
   2  -5  -1 371.904 32.3333  25
  -2  -5   1 399.526 30.8733  29
  -2  -5   1 417.594 34.8524  27
   2  -5  -2 1192.53 56.9915  25
  -2  -5   2 1251.26 56.6044  29
  -2  -5   2 1274.45 59.7615  27
   2  -5  -3 1208.70 55.5986  25
  -2  -5   3 1184.61 55.2482  29
  -2  -5   3 1258.28 58.8452  27
   2  -5  -4 4305.10 147.655  25
  -2  -5   4 4352.65 148.815  29
  -2  -5   4 4368.07 151.149  27
   2  -5  -5 2021.95 79.2852  25
  -2  -5   5 2127.51 81.7917  29
  -2  -5   5 1978.67 83.5358  27
   2  -5  -6 380.231 30.1277  25
  -2  -5   6 374.387 32.8405  29
  -2  -5   6 334.803 34.0627  27
   2  -5  -7 72.4666 20.3088  25
  -2  -5   7 37.1667 22.7660  29
  -2  -5   8 155.301 25.8832  24
   2  -5  -8 127.830 21.5517  25
  -2  -5   9 482.277 34.9493  24
  -2  -5   9 546.269 36.2927  29
  -2  -5   9 536.936 39.5290  37
  -2  -5  10 692.880 43.6372  37
  -2  -5  10 765.926 42.7551  24
  -2  -5  10 735.727 41.0687  29
  -2  -5  11 212.020 28.8114  37
  -2  -5  11 156.225 25.1532  24
  -2  -5  11 219.696 25.6824  29
  -2  -5  12 250.438 28.4726  37
  -2  -5  12 245.685 27.3413  24
  -2  -5  12 224.226 25.5916  29
  -2  -5  13 11.7432 18.4971  24
  -2  -5  13 19.5475 21.2635  37
  -2  -5  13 23.6458 17.0042  29
  -2  -5  14 40.4754 18.0766  24
  -2  -5  14 42.1696 16.4967  29
  -2  -5  15 29.3700 15.7531  24
  -2  -5  15-3.27176 14.6789  27
   2  -6  12 4.95573 12.8047  25
  -2   6 -12 6.59271 9.71957  22
   2  -6  11 27.8839 15.8424  25
  -2   6 -11 28.8271 11.8812  22
  -2   6 -10 57.4798 13.3720  22
   2  -6  10 49.3084 17.2880  25
   2  -6   9 7.92844 17.4776  25
   2  -6   8 36.5394 21.0427  25
   2  -6   7 173.726 24.9922  25
   2  -6   6 15.6619 20.9679  25
   2  -6   5 24.3191 21.3329  25
   2  -6   4 90.4601 23.3874  25
   2  -6   3 33.1396 21.7004  25
   2  -6   2 857.002 45.9744  25
  -2  -6  -1 126.857 19.7340  34
   2  -6   1 137.595 24.0305  25
   2  -6   0 495.972 34.0615  25
  -2  -6   0 494.961 31.2331  34
   2  -6  -1 182.044 24.4428  25
   2  -6  -2 808.176 43.1409  25
  -2  -6   2 870.357 44.6506  27
   2  -6  -3 28.9959 18.9825  25
  -2  -6   3 20.8372 21.3725  27
   2  -6  -4 200.339 23.9619  25
  -2  -6   4 188.391 26.0755  27
   2  -6  -5 23.2192 17.3036  25
  -2  -6   5 56.0639 19.9610  29
  -2  -6   5 36.9640 21.1915  27
   2  -6  -6-1.57039 16.5244  25
  -2  -6   6 10.2530 18.3908  29
  -2  -6   6 30.3547 20.3595  27
   2  -6  -7 222.739 21.8236  25
  -2  -6   7 191.805 23.4267  29
  -2  -6   7 191.344 24.4820  27
  -2  -6   8 37.0997 17.8498  29
   2  -6  -8 68.9328 16.4670  25
  -2  -6   9 17.1793 15.7861  29
  -2  -6  10 49.3902 16.3920  29
  -2  -6  11 13.8207 13.9702  29
  -2  -6  12 3.94367 12.2056  29
   2  -7   7 17.3319 11.8946  25
   2  -7   6 657.524 30.5467  25
   2  -7   5 381.799 23.5377  25
   2  -7   4 1614.56 60.3027  25
   2  -7   3 490.366 28.4212  25
   2  -7   2 161.055 18.9933  25
   2  -7   1 181.403 19.6433  25
   2  -7   0 44.3162 15.9488  25
   2  -7  -1 201.345 19.6655  25
   2  -7  -2 196.782 19.3376  25
   2  -7  -3 628.108 30.9629  25
   2  -7  -4 1922.01 68.1467  25
   2  -7  -5 348.611 21.0956  25
  -2  -7   6 405.311 21.9220  34
  -2  -7   7 10.1628 9.89492  34
  -3   0 -20 187.026 15.9523  31
  -3   0 -19-0.99164 14.2339  31
  -3   0 -18 79.7721 18.3419  31
  -3   0 -17 10.0452 18.9760  31
  -3   0 -16 64.0121 17.6226  36
  -3   0 -16 65.1756 22.1977  31
  -3   0 -15-4.68880 16.3589  36
  -3   0 -14 245.759 24.2384  36
  -3   0 -14 285.461 27.3070  34
  -3   0 -13 3.04779 16.4453  36
  -3   0 -13 37.6999 20.6695  34
  -3   0 -12 2017.51 75.4840  36
  -3   0 -12 2099.88 77.7739  34
  -3   0 -12 2115.78 76.6841  32
   3   0  12 2009.97 96.4936  17
  -3   0 -11-2.67386 14.4569  36
  -3   0 -11 9.75156 14.6939  32
   3   0  11 3.42665 26.3274  17
  -3   0 -11 5.74007 16.7142  34
  -3   0 -10 2794.99 95.4668  36
  -3   0 -10 2817.75 96.9233  34
  -3   0 -10 2841.91 96.3985  32
   3   0  10 2721.08 110.979  17
   3   0   9 5.44503 20.7158  17
   3   0   8 45.9243 23.0740  17
  -3   0  -7 5.22744 14.3207  10
   3   0   7-2.14085 18.8785  17
  -3   0  -6 5036.58 165.021  10
   3   0   6 4989.06 167.556  17
  -3   0  -5 18.7379 14.5672  10
   3   0   5 29.0276 17.4630  17
  -3   0  -4 18476.5 563.621  10
  -3   0  -3 19.0578 16.0620  13
  -3   0  -3 33.1089 15.3652  10
  -3   0  -2 4541.93 152.109  20
  -3   0  -1 26.0147 17.8941  20
  -3   0   0-3.29679 15.7580  20
   3   0  -1 23.4989 17.2292  14
  -3   0   1 27.6961 19.0924  20
   3   0  -2 4751.61 156.566  14
  -3   0   2 4737.50 159.723  20
   3   0  -3 47.4925 19.8465  14
   3   0  -4 20712.2 632.383  14
   3   0  -5 32.0677 19.5888  14
   3   0  -5 24.7187 17.3633  19
   3   0  -6 5045.66 172.338  14
   3   0  -6 5131.95 171.514  19
   3   0  -7 4.81060 20.9010  14
   3   0  -7 16.4546 19.5636  19
   3   0  -8 55.5575 22.8356  14
   3   0  -8 79.8540 22.0513  12
   3   0  -8 94.5067 25.1802  19
   3   0  -9-11.3475 19.8670  12
   3   0  -9 17.4625 21.5959  14
   3   0  -9 18.5017 24.2550  19
   3   0 -10 3068.91 119.149  14
   3   0 -10 3188.93 113.882  12
   3   0 -10 2847.99 104.118  31
   3   0 -10 3001.72 120.866  19
   3   0 -11-1.59276 20.8877  31
   3   0 -11 7.88171 25.0172  19
   3   0 -12 2124.31 80.8860  31
   3   0 -12 2160.72 102.869  19
   3   0 -13 3.53042 24.3411  31
   3   0 -14 221.584 27.3769  26
   3   0 -15-41.8109 21.6079  26
   3   0 -16 58.8848 22.7623  26
   3   0 -17 3.38995 19.9472  26
  -3   0  18 128.106 27.8662  39
   3   0 -18 99.6489 20.5547  26
  -3   0  19 10.9756 22.7730  39
  -3   0  20 142.468 23.2314  39
  -3   1 -19 9.18049 14.1616  31
  -3  -1 -19-2.66036 13.4825  31
  -3   1 -19 27.0240 13.3449  26
  -3   1 -18 467.802 28.7114  26
  -3   1 -18 424.996 27.0850  31
  -3  -1 -18 475.671 27.6657  31
  -3   1 -17 44.3390 15.8314  36
  -3   1 -17 60.3210 19.4190  31
  -3  -1 -17 65.5004 18.9114  31
  -3   1 -16 715.071 37.5209  36
  -3   1 -16 755.595 40.3207  31
  -3  -1 -16 814.829 40.2272  31
  -3   1 -15 329.507 26.5340  36
  -3  -1 -15 331.767 28.1464  34
  -3  -1 -14 33.1748 17.5556  36
  -3  -1 -14 39.1963 19.3706  34
  -3   1 -14 15.7849 18.4321  32
  -3   1 -14 52.7982 18.7399  36
  -3  -1 -13 331.986 25.5795  36
  -3   1 -13 387.585 27.3563  36
  -3  -1 -13 403.834 28.9861  34
  -3   1 -13 364.534 28.3230  32
  -3   1 -12 129.992 20.1921  36
  -3  -1 -12 108.578 20.9241  34
  -3   1 -12 109.638 20.0200  32
   3  -1  12 137.996 32.9972  17
  -3   1 -11 30.7484 15.9050  36
  -3   1 -11 18.5480 16.9602  32
  -3  -1 -11-1.48965 17.4275  34
   3  -1  11-3.51465 26.2161  17
  -3   1 -10 679.575 34.7268  36
  -3  -1 -10 679.051 35.2877  34
  -3   1 -10 841.549 37.6376  32
   3  -1  10 696.565 49.3342  17
   3   1  10 695.989 49.3996  17
  -3  -1  -9 711.015 33.6468  34
  -3   1  -9 679.365 32.8973  36
  -3   1  -9 747.834 35.5767  32
   3  -1   9 720.537 45.2358  17
   3   1   9 612.768 45.7083  17
   3  -1   8 1789.94 77.8067  17
   3   1   8 1946.47 81.4177  17
   3  -1   7 751.375 42.0833  17
   3   1   7 755.115 45.4603  17
  -3   1  -6 1355.78 56.8551  10
   3  -1   6 1434.29 59.2539  17
  -3   1  -5 20.8518 16.6731  13
   3  -1   5 32.2519 16.8962  17
  -3   1  -4 157.028 21.3585  13
  -3  -1  -4 116.653 17.9841  10
   3  -1   4 136.647 19.5626  17
  -3   1  -3 1856.28 72.6376  13
  -3  -1  -3 1815.53 69.4134  10
   3  -1   3 1841.93 67.3971  17
  -3  -1  -2 4520.88 149.449  10
   3  -1   2 4618.57 147.109  17
   3  -1   1 188.553 27.1930  21
  -3   1  -1 144.840 23.1441  20
  -3  -1  -1 183.714 19.0145  10
   3  -1   0 23.8533 19.5273  21
  -3   1   0 11.9207 19.5175  20
  -3  -1   0 1.19111 11.6336  10
  -3   1   1 205.785 26.1537  20
  -3   1   2 4580.43 157.483  20
  -3   1   3 1758.08 74.5189  20
  -3   1   4 127.191 25.3984  20
  -3   1   5 31.0300 23.1456  20
   3   1  -5 23.2237 17.6344  19
   3  -1  -6 1478.51 67.1882  19
   3   1  -6 1580.68 66.3632  19
   3  -1  -7 717.134 46.4374  19
   3   1  -7 846.396 45.1996  19
   3   1  -8 1922.60 84.4260  14
   3   1  -8 2096.19 83.4141  12
   3  -1  -8 1987.01 88.3387  19
   3   1  -8 2076.95 85.5963  19
   3   1  -9 658.903 43.4714  12
   3   1  -9 738.652 46.4433  14
   3  -1  -9 642.494 48.5748  19
   3   1  -9 700.661 47.0859  19
   3  -1  -9 696.967 38.2027  26
   3   1 -10 683.433 48.5920  14
   3   1 -10 816.423 48.1657  12
   3   1 -10 684.796 48.9301  19
   3  -1 -10 642.657 38.3433  26
   3   1 -11 10.9004 22.7392  14
   3   1 -11 8.98799 22.5721  12
   3   1 -11 22.9833 25.6509  19
   3  -1 -11-10.4104 20.2092  26
   3  -1 -12 53.2851 22.4137  26
   3   1 -12 97.1113 31.0711  19
   3  -1 -13 355.253 31.7580  26
   3  -1 -14 58.9618 23.7555  26
   3  -1 -15 294.205 29.9483  26
   3  -1 -16 706.607 40.5041  26
   3  -1 -17 42.9185 19.8255  26
  -3  -1  18 370.996 34.3480  39
  -3  -1  19 22.7059 22.0683  39
  -3   2 -19-14.3646 12.4176  26
   3  -2  19 15.2733 17.4725  29
   3  -2  18 316.794 28.4033  29
  -3   2 -17 97.3874 15.8129  36
   3  -2  17 90.9333 24.5973  29
  -3   2 -16 750.502 36.4159  36
  -3  -2 -16 767.534 37.8068  34
   3  -2  16 653.586 43.1446  29
  -3   2 -15 16.6685 16.8776  36
  -3  -2 -15 44.9547 19.2206  34
  -3   2 -14 143.879 20.3464  36
  -3  -2 -14 106.043 21.0527  34
  -3  -2 -13 125.249 22.2155  34
  -3   2 -13 97.3722 21.6620  32
  -3  -2 -12 176.853 23.4419  34
  -3   2 -12 134.681 23.3384  32
  -3   2 -11 240.465 22.9347  36
  -3  -2 -11 219.149 22.9252  34
  -3   2 -11 150.188 23.2786  32
   3  -2  11 193.591 36.0909  17
  -3   2 -10 1587.08 61.1103  36
  -3  -2 -10 1636.64 62.3858  34
  -3   2 -10 1557.28 62.6638  32
   3  -2  10 1525.64 77.0124  17
   3  -2   9 779.532 40.2229  33
  -3  -2  -9 774.407 38.2387  34
  -3   2  -9 789.991 38.8958  32
  -3  -2  -9 904.421 49.8167  11
  -3   2  -9 815.199 37.9154  36
   3  -2   9 706.561 47.5073  17
  -3  -2  -8 2842.64 97.8298  34
  -3   2  -8 2884.97 97.0434  36
  -3   2  -8 2957.39 98.0720  32
  -3  -2  -8 2729.40 108.457  11
   3  -2   8 2859.48 101.037  28
   3  -2   8 2686.27 108.553  17
  -3  -2  -7 1075.74 55.4823  11
   3  -2   7 1168.68 55.7954  17
  -3  -2  -6 314.407 27.8967  11
   3  -2   6 253.208 26.5780  17
  -3  -2  -5 2133.19 83.9294  11
   3  -2   5 2165.63 81.9195  17
  -3   2  -4 3317.41 120.601  13
  -3   2  -3 1312.62 61.1465  13
  -3   2  -2 710.851 42.5795  13
  -3   2  -1 2995.21 112.034  13
   3  -2   1 3126.63 116.214  21
   3  -2   0 66.2206 24.1990  21
   3  -2  -1 2814.27 107.838  21
  -3   2   1 2780.14 106.338  20
   3  -2  -2 910.818 49.2241  21
  -3   2   2 772.550 47.7207  20
   3  -2  -3 1544.41 67.8679  21
  -3   2   3 1309.12 65.5865  20
   3  -2  -4 3232.73 122.096  21
  -3   2   4 3231.73 121.468  20
   3  -2  -5 2256.90 93.0955  21
  -3   2   5 2126.09 91.1234  20
   3  -2  -6 231.402 32.1652  21
  -3   2   6 273.651 32.4648  20
   3   2  -7 1175.83 56.3610  12
   3  -2  -7 983.055 59.7507  21
   3  -2  -8 2981.49 119.791  16
  -3  -2   8 2843.22 103.567  24
   3   2  -8 2938.29 111.937  12
   3  -2  -8 3016.65 119.670  21
   3   2  -8 3156.97 116.568  19
   3  -2  -8 2752.70 102.880  26
   3   2  -9 811.950 50.0285  12
  -3  -2   9 757.092 41.2878  24
   3   2  -9 762.479 51.1124  19
   3  -2  -9 703.029 41.9415  26
   3  -2  -9 750.272 55.4228  16
   3   2 -10 1814.67 78.7747  12
   3  -2 -10 1636.12 86.5855  16
   3   2 -10 1625.86 82.1678  19
   3  -2 -10 1645.77 68.1410  26
   3   2 -11 278.789 36.2419  14
   3  -2 -11 240.064 28.8953  26
   3   2 -11 245.166 36.3234  19
   3  -2 -11 230.152 40.7330  16
   3  -2 -12 160.090 26.7755  26
   3  -2 -13 137.134 27.4607  26
   3  -2 -14 80.8451 24.0731  26
  -3  -2  15 24.5104 24.5008  39
   3  -2 -15-5.68852 21.7600  26
  -3  -2  16 581.442 39.8619  39
  -3  -2  17 70.5893 24.4598  39
  -3  -2  17 76.2828 26.0664  37
  -3  -2  18 253.366 27.5717  39
  -3  -2  18 287.722 30.6970  37
  -3  -2  19 24.6452 20.2637  37
  -3  -2  19 10.9536 18.6319  39
  -3   3 -18 53.9353 13.4115  26
   3  -3  18 48.6703 17.6317  29
   3  -3  17 108.938 21.5417  29
  -3  -3 -16 18.2818 14.3189  34
   3  -3  16 1.78840 21.1789  29
  -3   3 -15 5.18452 13.9891  36
  -3  -3 -15 33.8313 15.8305  34
   3  -3  15 7.81317 22.6118  29
  -3   3 -14 192.715 21.1404  36
  -3  -3 -14 181.310 21.5572  34
   3  -3  14 236.254 29.6581  29
  -3   3 -13 19.6426 16.3817  36
  -3  -3 -13 19.6652 17.4638  34
   3  -3  13-14.6098 23.3252  29
  -3  -3 -12 126.891 20.3121  34
   3  -3  12 117.167 25.3106  29
  -3   3 -12 111.292 19.3485  36
  -3   3 -11 86.5734 18.8009  36
  -3  -3 -11 101.234 19.8466  34
   3  -3  11 61.7528 21.1578  33
  -3  -3 -10 52.0375 18.6878  34
   3  -3  10 53.3555 20.2259  33
  -3   3 -10 16.4079 16.4301  32
  -3   3 -10 25.8311 16.2204  36
  -3   3  -9 177.954 20.2729  36
   3  -3   9 129.254 21.5570  33
  -3  -3  -9 101.222 20.4884  34
  -3  -3  -9 140.193 26.8328  11
  -3   3  -8 10.1280 16.1771  36
  -3  -3  -8 13.7867 16.6533  34
   3  -3   8 20.0688 17.0533  33
  -3  -3  -8 38.8963 21.9847  11
  -3   3  -7 15.4991 15.6038  36
   3  -3   7-3.10727 16.2213  33
  -3  -3  -7-9.15597 21.6937  11
  -3  -3  -7 16.3782 16.0634  34
   3  -3   7 37.2395 17.9921  28
   3  -3   7-3.48390 22.7326  18
  -3  -3  -6 69.9665 17.7012  35
  -3   3  -6 51.0096 17.6727  36
   3  -3   6 62.2801 18.1669  33
  -3  -3  -6 46.4563 18.3072  34
  -3  -3  -6 80.0589 21.7360  11
   3  -3   6 74.5245 22.8523  18
   3  -3   6 85.8187 18.9456  28
  -3  -3  -5 81.6440 18.4332  35
  -3  -3  -5 103.531 18.5903  34
   3  -3   5 65.1285 17.3526  33
  -3  -3  -5 85.4157 22.2422  11
   3  -3   5 54.1138 21.8481  18
   3  -3   5 77.5175 17.9218  28
  -3  -3  -4 1281.53 51.5306  35
  -3  -3  -4 1344.72 53.5421  34
   3  -3   4 1367.49 51.9046  33
  -3  -3  -4 1343.05 61.1235  11
   3  -3   4 1215.66 50.9993  28
  -3   3  -3 770.348 46.6874  13
  -3  -3  -3 816.378 44.3140  11
  -3   3  -2 1255.76 61.8444  13
  -3   3  -1 44.2426 21.1831  13
  -3   3   0 2.75377 19.1275  13
  -3   3   1 19.2447 19.2164  13
   3  -3  -2 1414.36 70.1895  21
   3  -3  -3 885.334 52.4617  21
   3  -3  -4 1275.52 56.8268  23
  -3  -3   4 1260.85 56.8538  24
  -3  -3   4 1317.60 58.7410  37
   3  -3  -4 1382.59 67.9116  21
  -3  -3   4 1444.52 56.6834  29
  -3  -3   5 63.3832 21.2117  24
   3  -3  -5 40.1217 23.9245  21
  -3  -3   5 22.6321 20.5930  29
  -3  -3   5 28.7738 24.4675  37
  -3  -3   6 108.470 27.6737  37
   3  -3  -6 124.357 28.7627  21
  -3  -3   6 53.2252 23.4358  24
  -3  -3   6 104.403 22.6884  29
  -3  -3   7 20.9581 25.2635  37
  -3  -3   7 1.98552 20.5106  24
   3  -3  -7-7.24432 25.0109  21
  -3  -3   8 47.8411 25.6647  37
  -3  -3   8 26.8062 22.2670  24
  -3  -3   9 204.093 33.6379  37
  -3  -3   9 108.569 25.7619  24
   3   3  -9 142.948 33.1799  19
  -3  -3  10 62.0065 29.4375  37
  -3  -3  10 28.3764 22.0957  24
  -3  -3  11 109.589 29.4765  37
  -3  -3  11 84.2866 25.4439  24
  -3  -3  12 153.551 26.6020  24
  -3  -3  12 114.727 28.9419  37
  -3  -3  13 53.2882 27.3799  37
  -3  -3  13-13.1633 22.3015  24
  -3  -3  14 209.176 32.0198  37
  -3  -3  14 191.913 26.3345  24
  -3  -3  15 36.2242 25.7580  37
  -3  -3  16 84.1665 26.4558  37
  -3  -3  17 158.698 25.8637  37
  -3  -3  18 24.1572 19.6236  37
   3  -3 -18 40.4949 12.3405  23
   3  -4  16 89.0452 17.7722  29
  -3  -4 -15 88.0937 14.6996  34
   3  -4  15 148.932 21.5162  29
  -3   4 -14-8.69615 12.9011  22
   3  -4  14 16.4690 20.0451  29
  -3  -4 -14 8.56168 14.4821  34
  -3  -4 -13 846.656 39.7047  34
   3  -4  13 911.099 45.0359  29
  -3  -4 -12 249.528 22.5537  34
   3  -4  12 228.402 26.3805  29
  -3  -4 -11 53.8192 18.3983  34
   3  -4  11 24.3543 20.4884  29
  -3  -4 -10 34.3230 17.6596  34
  -3  -4  -9 1004.04 46.7490  34
  -3  -4  -8 807.214 40.5664  34
  -3  -4  -7 35.4027 19.2485  34
  -3  -4  -6 167.077 22.0835  34
   3  -4   6 118.882 27.2294  18
  -3   4  -5 1252.92 53.0522  36
  -3  -4  -5 1307.33 54.6273  34
  -3  -4  -5 1218.53 66.1462  11
   3  -4   5 1328.69 54.2518  33
   3  -4   5 1215.91 67.4448  18
  -3  -4  -4 783.799 40.1452  34
   3  -4   4 750.189 37.9614  33
   3  -4   4 741.878 48.4916  18
  -3  -4  -3 197.008 20.7502  35
   3  -4   3 215.557 28.3320  25
  -3  -4  -3 205.022 23.1887  34
  -3  -4  -2 51.7651 17.0220  35
   3  -4   2 4.03050 23.0921  25
   3  -4   2 12.3284 18.3044  18
  -3  -4  -2 40.5490 22.3212  27
   3  -4   1 163.038 25.5798  25
  -3  -4  -1 149.064 25.9554  27
  -3  -4   0-7.55856 22.3752  27
   3  -4  -1 208.720 27.0049  23
  -3  -4   1 196.327 27.2498  27
   3  -4  -2 30.2394 22.5354  23
  -3  -4   2 8.96929 20.1001  29
  -3  -4   2 25.6940 23.3149  27
   3  -4  -3 187.023 26.1746  23
  -3  -4   3 190.419 25.8375  29
  -3  -4   3 189.232 28.2376  27
   3  -4  -4 706.056 42.3684  23
  -3  -4   4 775.430 43.1175  29
  -3  -4   5 1456.94 68.4194  37
  -3  -4   5 1552.09 65.4504  24
   3  -4  -5 1395.44 63.6737  23
  -3  -4   5 1462.53 63.6734  29
  -3  -4   6 166.094 31.2328  37
  -3  -4   6 147.387 27.9275  24
   3  -4  -6 227.510 28.1596  23
  -3  -4   6 265.316 28.6710  29
  -3  -4   7 2.41829 28.9131  37
  -3  -4   7 73.3661 23.9816  24
   3  -4  -7 79.4219 24.5571  23
  -3  -4   7 62.4074 23.7504  29
  -3  -4   8 793.130 50.0364  37
  -3  -4   8 793.983 45.9004  24
   3  -4  -8 789.535 44.1813  23
  -3  -4   8 799.903 43.9184  29
  -3  -4   9 1010.00 55.3514  37
  -3  -4   9 932.210 51.3490  24
   3  -4  -9 977.672 50.1789  23
  -3  -4   9 1037.85 50.0342  29
  -3  -4  10 38.3150 27.6721  37
  -3  -4  10 44.8394 23.1777  24
   3  -4 -10 16.1578 20.9393  23
  -3  -4  11 69.6460 28.3224  37
   3  -4 -11 5.86296 20.7868  23
  -3  -4  11 28.4775 22.6437  24
  -3  -4  12 203.648 30.8039  37
  -3  -4  12 221.002 27.8200  24
   3  -4 -12 229.083 26.1799  23
  -3  -4  13 1025.14 52.1046  37
  -3  -4  13 913.344 47.5367  24
   3  -4 -13 929.785 45.1221  23
  -3  -4  14 5.68398 22.3889  37
  -3  -4  14-16.3429 20.1537  24
  -3  -4  15 74.1616 22.3933  37
  -3  -4  16 73.4290 20.9205  37
   3   4 -16 60.1003 11.7720  38
  -3   5 -14 97.2093 12.7808  22
   3  -5  14 85.4414 17.4690  25
   3  -5  13 93.4675 19.4607  25
  -3   5 -13 62.7776 13.6412  22
   3  -5  12 10.1435 19.6870  25
  -3   5 -12 58.3835 14.6553  22
   3  -5  11 9.45864 22.5816  25
  -3  -5 -11 10.9012 12.6154  34
   3  -5  10 39.1363 24.4753  25
  -3  -5 -10 48.0165 15.5931  34
  -3  -5  -9 310.590 24.1056  34
   3  -5   9 304.607 32.1680  25
   3  -5   8 260.508 32.5728  25
  -3  -5  -8 359.808 25.6214  34
   3  -5   7 189.690 29.7185  25
  -3  -5  -7 169.514 20.8928  34
   3  -5   6 1085.31 56.2569  25
  -3  -5  -6 1092.83 48.5326  34
   3  -5   5 153.285 30.7072  25
  -3  -5  -5 138.939 21.3841  34
   3  -5   4 27.9279 25.8549  25
  -3  -5  -4 45.6371 19.5147  34
   3  -5   3 1404.71 64.3369  25
  -3  -5  -3 1342.55 58.1412  34
   3  -5   2 1629.89 73.3037  25
  -3  -5  -2 1792.67 69.6212  34
   3  -5   1 231.822 29.9132  25
  -3  -5  -1 222.180 25.4235  34
   3  -5   0 2.07791 22.3597  25
  -3  -5   0 6.22382 23.0245  27
   3  -5  -1 210.133 27.9323  25
  -3  -5   1 199.365 28.9577  27
   3  -5  -2 1762.99 71.0828  25
  -3  -5   2 1689.24 73.5838  27
  -3  -5   3 1552.06 69.2384  27
  -3  -5   4 28.5176 23.6464  29
  -3  -5   4 40.1762 26.2321  27
  -3  -5   5 155.133 25.6101  29
  -3  -5   5 202.116 29.9504  27
  -3  -5   6 1087.25 51.0904  29
  -3  -5   6 952.463 52.7731  27
  -3  -5   7 203.240 26.5058  29
  -3  -5   7 155.756 27.4295  27
  -3  -5   8 282.716 27.7480  29
  -3  -5   8 277.820 31.3521  27
  -3  -5   9 387.505 30.6510  24
  -3  -5   9 385.871 30.0290  29
  -3  -5   9 354.807 32.3637  27
  -3  -5  10 40.0163 18.4996  29
  -3  -5  11 1.51737 16.3677  29
  -3  -5  12 34.9878 16.2167  29
  -3  -5  12 65.0695 20.0611  27
  -3  -5  13 81.3720 18.8001  27
  -3  -5  14 136.244 18.5576  27
   3  -6  11-4.12240 13.5379  25
  -3   6 -11-2.25351 9.33379  22
  -3   6 -10 51.1071 11.4473  22
   3  -6  10 25.7111 15.5404  25
   3  -6   9-7.01796 16.9204  25
   3  -6   8 193.365 22.9308  25
   3  -6   7 81.9128 21.2848  25
  -3  -6  -7 95.6426 14.4660  34
  -3  -6  -6-3.67500 13.5641  34
   3  -6   6-1.76924 19.7706  25
   3  -6   5 51.2118 22.3371  25
  -3  -6  -5 67.2091 15.5221  34
   3  -6   4 52.4040 20.7516  25
  -3  -6  -4 64.5591 15.6417  34
   3  -6   3 11.2787 20.2340  25
  -3  -6  -3 20.6507 14.8353  34
   3  -6   2-5.60057 18.7663  25
  -3  -6  -2 18.4592 15.3331  34
   3  -6   1 45.9902 19.9728  25
  -3  -6  -1 33.4300 16.6142  34
   3  -6   0 55.7614 20.9328  25
  -3  -6   0 21.2524 17.5365  34
  -3  -6   1 21.6400 17.3426  34
   3  -6  -1 19.2060 18.0941  25
   3  -6  -2 10.0949 17.4285  25
   3  -6  -3 1.60645 16.6022  25
  -3  -6   3 41.4748 20.7434  27
  -3  -6   4 79.9365 20.6083  27
  -3  -6   5 51.7103 20.5896  27
  -3  -6   6-3.28724 19.4219  27
  -3  -6   7 27.6779 18.9470  27
  -3  -6   8 153.616 21.2182  27
  -3  -6   9 23.9913 16.2714  27
  -3  -6  10 48.4570 14.8651  27
  -3  -6  11 13.8870 12.0273  27
   3  -7   5 36.3621 12.5065  25
   3  -7   4 127.132 15.0832  25
   3  -7   3 28.6137 13.0477  25
   3  -7   2 9.39429 12.1351  25
   3  -7   1 35.7441 13.0392  25
  -3  -7  -1 21.5496 10.6020  34
  -3  -7   0 6.24544 10.2622  34
   3  -7   0 7.24219 11.9758  25
   3  -7  -1 40.0484 12.6496  25
  -3  -7   1 50.6803 11.6700  34
   3  -7  -2 7.61642 11.0065  25
  -3  -7   2 26.0554 11.2153  34
   3  -7  -3 22.9874 10.9766  25
  -3  -7   3 34.0620 11.7999  34
  -3  -7   4 80.6192 12.2468  34
  -3  -7   5 36.1172 10.2656  34
  -4   0 -19 12.2661 11.5499  31
  -4   0 -18 79.6587 16.1077  31
  -4   0 -17 7.22213 16.8696  31
  -4   0 -16 1108.77 45.7967  36
  -4   0 -15 5.58025 14.6022  36
  -4   0 -14 7889.31 248.354  36
  -4   0 -14 7865.70 248.976  32
  -4   0 -13 35.8239 16.9566  36
  -4   0 -13 24.0303 18.6712  34
  -4   0 -13 8.00794 17.5817  32
  -4   0 -12 270.080 23.9490  36
  -4   0 -12 311.907 25.6272  32
  -4   0 -11 6.15864 16.6495  32
  -4   0 -10 903.027 40.6605  32
   4   0  10 728.402 54.7163  17
  -4   0  -9 18.1738 15.5940  32
   4   0   9 13.1215 23.0568  17
  -4   0  -8 59.4172 16.4545  32
   4   0   8 74.6103 25.3091  17
  -4   0  -7-1.25174 14.2710  32
  -4   0  -7 4.66178 17.0258  10
   4   0   7-13.5260 21.3754  17
  -4   0  -6 5650.49 191.563  10
   4   0   6 5798.11 193.903  17
  -4   0  -5 56.1218 20.6395  10
   4   0   5 58.4120 23.3304  17
  -4   0  -4 12417.5 385.640  10
   4   0   4 12215.6 385.296  17
  -4   0  -3 39.3374 19.6371  10
  -4   0  -2 763.886 40.2418  10
  -4   0  -1 23.3081 16.2801  10
  -4   0   0 336.285 31.4036  20
  -4   0   1 22.3440 22.2983  20
   4   0  -2 879.877 48.1665  14
  -4   0   2 933.512 51.2955  20
   4   0  -3 36.9364 22.9668  14
  -4   0   3 27.8175 21.8003  20
   4   0  -4 12669.9 393.293  14
  -4   0   4 12074.6 395.316  20
   4   0  -5 105.570 28.1907  14
  -4   0   5 114.372 29.6875  20
   4   0  -6 5916.37 203.957  14
  -4   0   7 7.39774 22.2965  39
   4   0  -7 19.1630 25.1240  14
   4   0  -8 75.6745 27.4121  14
  -4   0   8 84.3694 26.0155  39
   4   0  -8 86.5918 25.0473  12
  -4   0   9-2.07088 24.5217  39
   4   0  -9 22.2340 24.1794  14
   4   0 -10 837.727 57.9093  14
   4   0 -10 888.366 58.9151  19
  -4   0  10 741.993 46.6891  39
  -4   0  11 13.5188 25.9664  39
   4   0 -11 8.50227 27.3643  14
   4   0 -11-18.1354 28.7816  19
  -4   0  12 171.244 32.4042  39
  -4   0  13 2.34262 25.4538  39
  -4   0  14 7013.40 231.045  39
  -4   0  15-6.77438 24.9459  39
  -4   0  16 945.006 50.8991  39
  -4   0  17 44.4213 23.5440  39
  -4   0  18 66.5506 22.0506  39
  -4   1 -18 74.1880 14.9027  31
  -4  -1 -18 86.3293 14.8635  31
   4  -1  18 93.3935 20.6556  29
  -4   1 -17 146.115 16.8710  36
  -4   1 -17 158.812 19.2991  31
  -4  -1 -17 171.314 19.4517  31
  -4   1 -16 555.362 30.5553  36
  -4   1 -16 570.764 32.4515  31
  -4  -1 -16 591.558 32.2525  31
  -4   1 -15 404.379 26.2270  36
  -4  -1 -15 405.571 27.9950  34
  -4   1 -14 44.3580 17.1558  36
  -4  -1 -14 41.6724 19.3421  34
  -4   1 -14 9.98023 16.8846  32
  -4   1 -13 45.2401 17.5072  36
  -4  -1 -13 31.1381 18.3471  34
  -4   1 -13 35.7777 17.4935  32
  -4   1 -12 224.110 22.4277  36
  -4  -1 -12 252.661 25.4671  34
  -4   1 -12 264.865 24.4479  32
  -4   1 -11 19.4645 16.3612  36
  -4  -1 -11 11.0240 18.2401  34
  -4   1 -11 41.1423 17.9803  32
  -4   1 -10 417.165 26.5450  36
  -4  -1 -10 367.557 27.9212  34
  -4   1 -10 417.197 28.0264  32
   4  -1  10 370.737 39.9670  17
   4   1  10 416.192 42.8245  17
  -4   1  -9 16.1165 14.8719  36
  -4   1  -9-2.94240 16.2530  32
  -4  -1  -9 2.72166 14.6801  32
   4  -1   9 22.3295 24.0331  17
   4   1   9-10.6915 25.7536  17
  -4   1  -8 1876.96 66.1294  36
  -4   1  -8 1802.49 67.2834  32
  -4  -1  -8 1710.58 65.3051  32
   4  -1   8 1764.29 79.2245  17
   4   1   8 1664.46 81.3425  17
  -4   1  -7 97.7216 16.4029  36
  -4   1  -7 127.030 17.6410  32
  -4  -1  -7 126.347 17.2035  32
   4   1   7 103.726 27.6715  17
   4  -1   7 67.4729 22.7748  17
  -4   1  -6 3579.61 115.405  32
  -4   1  -6 3274.04 124.137  10
   4  -1   6 3512.06 125.705  17
  -4   1  -5 318.070 29.8461  13
  -4   1  -5 285.171 28.0143  10
   4  -1   5 262.036 27.0264  17
  -4   1  -4 1435.28 65.3697  13
  -4  -1  -4 1409.97 61.5148  10
  -4   1  -3 1639.93 71.0453  13
  -4  -1  -3 1566.84 65.8940  10
  -4   1  -2 1515.22 68.8354  13
  -4  -1  -2 1602.85 64.3715  10
  -4   1  -1 1237.21 61.4327  20
  -4  -1  -1 1204.41 52.9831  10
  -4   1   0 64.1144 22.3749  20
  -4  -1   0 99.5784 16.6818  10
   4  -1  -1 1233.83 62.8488  21
  -4   1   1 1336.51 65.1438  20
  -4   1   2 1581.22 73.3258  20
  -4   1   3 1786.80 80.7594  20
   4   1  -4 1640.54 70.6011  14
  -4   1   4 1465.70 74.4968  20
   4   1  -5 432.784 36.1132  14
  -4   1   5 325.689 38.6432  20
   4   1  -6 3560.33 128.506  14
  -4   1   6 3419.00 134.469  20
  -4  -1   6 3210.93 118.340  39
  -4  -1   7 137.653 28.8795  39
  -4   1   7 104.052 32.0922  20
   4   1  -7 104.247 27.2478  14
   4   1  -8 1891.17 86.4877  14
  -4   1   8 1710.36 91.5868  20
   4   1  -8 1899.42 85.6453  19
  -4  -1   8 1730.52 77.6082  39
  -4  -1   9 28.7391 25.4252  39
   4   1  -9 7.43008 23.4194  14
   4   1  -9 6.25141 24.1326  12
  -4   1   9-4.49356 27.7127  20
   4   1  -9 22.1407 27.3828  19
  -4  -1  10 321.510 37.0507  39
   4   1 -10 417.065 43.4321  14
   4   1 -10 439.590 39.8743  12
  -4   1  10 375.026 45.1016  20
   4   1 -10 281.044 39.2096  19
  -4  -1  11 37.7637 26.6777  39
   4  -1 -11 3.79993 22.5480  26
  -4  -1  12 273.055 32.7209  39
   4  -1 -12 181.432 27.1149  26
  -4  -1  13 33.5058 28.2973  39
  -4  -1  14 60.9925 27.5527  39
  -4  -1  15 312.165 33.5780  39
  -4  -1  16 483.063 36.7272  39
  -4  -1  17 142.674 25.5724  39
  -4  -1  18 65.7415 21.7308  39
  -4   2 -18 37.4490 12.5206  26
   4  -2  18 12.1560 16.6327  29
  -4   2 -17 174.821 17.1067  36
   4  -2  17 193.486 23.5736  29
  -4   2 -16 584.837 30.8008  36
   4  -2  16 605.635 37.8254  29
  -4   2 -15 39.6343 15.7290  36
  -4  -2 -15 41.4063 16.4634  34
  -4   2 -14 40.2822 17.0082  36
  -4  -2 -14 34.3273 17.7847  34
  -4   2 -13 81.7727 19.4771  36
  -4  -2 -13 72.0788 20.9421  34
  -4   2 -13 93.3145 19.9804  32
  -4   2 -12 291.326 24.4396  36
  -4  -2 -12 231.772 24.9323  34
  -4   2 -12 209.336 23.5802  32
  -4  -2 -11 110.249 21.9138  34
  -4   2 -11 157.368 21.0170  36
   4  -2  11 99.3214 23.0935  33
  -4   2 -11 89.3223 20.4556  32
  -4   2 -10 6425.80 200.446  36
  -4  -2 -10 5941.40 199.968  34
   4  -2  10 6209.14 203.519  33
  -4   2 -10 6337.16 201.315  32
  -4   2  -9 516.380 31.0690  36
   4   2   9 437.493 47.0491  17
  -4  -2  -9 549.014 31.1063  34
   4  -2   9 454.868 31.8161  33
  -4   2  -9 502.239 31.5127  32
   4  -2   9 513.910 43.8612  17
  -4   2  -8 2787.18 94.6564  36
  -4  -2  -8 2657.07 93.7421  34
  -4   2  -8 2771.65 94.2239  32
  -4  -2  -8 2655.62 108.060  11
   4  -2   8 2569.05 97.5926  28
   4  -2   8 2638.66 107.453  17
   4   2   8 2564.53 113.484  17
  -4   2  -7 222.055 22.4358  36
  -4  -2  -7 224.552 22.8859  34
  -4  -2  -7 274.700 32.5597  11
   4  -2   7 274.301 25.9007  28
  -4   2  -6 1013.53 44.1815  36
  -4  -2  -6 1041.71 44.4833  35
  -4  -2  -6 988.350 43.9771  34
  -4  -2  -6 1081.67 55.8503  11
   4  -2   6 1006.40 46.2648  28
  -4   2  -5 878.360 39.4701  36
  -4   2  -5 865.304 50.8970  13
  -4  -2  -5 828.832 39.4262  35
   4  -2   5 880.635 41.0446  28
  -4  -2  -4 127.182 19.4873  35
  -4   2  -4 112.934 25.4985  13
   4  -2   4 126.561 18.3075  28
  -4   2  -3 572.799 43.4461  13
  -4   2  -2 6423.55 219.188  13
  -4   2  -1 8009.38 266.711  13
   4  -2   0 60271.1 1817.13  21
   4  -2  -1 7859.85 265.553  21
  -4   2   1 7918.02 265.969  20
   4  -2  -2 6977.63 239.937  21
  -4   2   2 7016.66 240.788  20
   4  -2  -3 727.613 52.4807  21
  -4   2   3 693.353 52.7221  20
  -4  -2   4 80.1873 22.1558  35
   4  -2  -4 93.0710 22.9578  23
   4  -2  -4 112.169 29.2575  21
  -4   2   4 133.209 32.0452  20
  -4  -2   4 108.631 25.0971  39
   4   2  -5 891.402 51.9865  14
  -4  -2   5 837.576 42.8792  35
   4  -2  -5 1001.28 60.2155  21
  -4   2   5 828.729 56.5251  20
  -4  -2   5 940.664 47.2386  39
   4   2  -6 1000.75 57.4446  14
   4  -2  -6 1073.83 64.4388  21
  -4   2   6 969.032 62.9941  20
  -4  -2   6 989.997 51.4128  39
  -4  -2   7 229.226 31.8028  39
   4   2  -7 267.657 33.9462  14
  -4   2   7 248.817 39.4869  20
   4   2  -7 189.237 32.8080  19
   4   2  -8 2646.50 110.085  14
  -4  -2   8 2512.34 95.5300  24
   4   2  -8 2899.04 108.303  12
   4  -2  -8 2707.99 116.735  21
   4   2  -8 2487.83 109.241  19
  -4  -2   8 2293.81 97.2093  39
   4   2  -9 600.833 47.9868  14
  -4  -2   9 500.756 36.3956  24
   4  -2  -9 504.828 48.1759  21
   4   2  -9 548.972 47.1372  19
  -4  -2  10 5364.16 183.158  39
  -4  -2  11 132.154 31.5971  39
  -4  -2  12 168.454 30.3775  39
  -4  -2  13 75.3280 27.8194  39
  -4  -2  14 76.3148 26.1748  39
  -4  -2  15 80.9642 25.4016  39
  -4  -2  16 585.414 37.9012  39
  -4  -2  17 188.180 24.5282  39
   4  -2 -18 29.7031 12.8476  23
  -4  -2  18 26.6171 17.4720  39
  -4   3 -17 6.19877 9.34134  36
   4  -3  17 2.22441 14.7538  29
  -4   3 -16 180.155 16.4288  36
  -4  -3 -16 197.516 17.3205  34
   4  -3  16 181.463 21.6138  29
  -4   3 -15 20.2725 13.5187  36
  -4  -3 -15 53.1845 15.1488  34
   4  -3  15-3.16060 18.7654  29
  -4   3 -14 66.1392 16.1540  36
  -4  -3 -14 75.0111 17.2536  34
   4  -3  14 64.4332 21.8128  29
  -4   3 -13 85.9082 18.4854  36
  -4  -3 -13 112.694 19.4633  34
   4  -3  13 107.296 22.4554  29
  -4   3 -12 536.407 31.6035  36
  -4  -3 -12 562.973 33.0965  34
   4  -3  12 514.357 34.6642  33
   4  -3  12 484.628 35.2943  29
  -4   3 -11 234.350 22.6289  36
   4  -3  11 257.540 26.8858  33
  -4  -3 -11 212.635 22.5247  34
  -4   3 -10 75.6447 19.5937  36
  -4  -3 -10 98.5116 21.1149  34
   4  -3  10 109.136 23.0047  33
  -4   3  -9 58.1459 18.1445  36
  -4  -3  -9-1.65923 17.3356  34
   4  -3   9 17.0300 19.5074  33
  -4   3  -8 77.2103 18.6920  36
  -4  -3  -8 67.1172 19.6481  34
   4  -3   8 58.0221 20.4581  33
   4  -3   8 76.4621 22.0057  28
  -4   3  -7 911.417 42.5557  36
  -4  -3  -7 897.720 42.9314  34
   4  -3   7 950.246 44.7520  33
   4  -3   7 906.914 45.7329  28
  -4   3  -6 107.718 19.9290  36
  -4  -3  -6 124.413 18.8965  35
  -4  -3  -6 107.285 19.7439  34
   4  -3   6 108.302 19.9080  33
  -4  -3  -6 102.731 25.1896  11
   4  -3   6 124.451 21.9551  28
  -4   3  -5 188.003 23.1180  36
  -4  -3  -5 213.072 21.9474  35
  -4  -3  -5 224.954 22.3656  34
   4  -3   5 182.503 21.8550  33
  -4  -3  -5 222.241 29.9148  11
   4  -3   5 232.377 22.8256  28
  -4  -3  -4 595.645 32.7998  35
  -4  -3  -4 624.094 32.8843  34
   4  -3   4 538.110 31.7233  33
  -4  -3  -4 562.455 41.6092  11
   4  -3   4 594.517 32.4482  28
  -4  -3  -3 190.414 21.9992  35
  -4   3  -3 161.562 29.2634  13
  -4  -3  -3 191.914 22.2577  34
   4  -3   3 198.648 20.2702  28
  -4  -3  -2 24.6030 18.4844  35
  -4   3  -2 10.3158 21.2163  13
  -4  -3  -2 22.5255 18.5342  34
   4  -3   2 30.1328 15.3560  28
  -4  -3  -1 135.918 20.7945  35
  -4   3  -1 165.338 28.7537  13
  -4   3   0 1874.55 90.3329  13
   4  -3   0 2019.47 83.3090  23
  -4  -3   1 161.543 22.3485  35
  -4   3   1 214.784 31.5640  13
   4  -3  -1 158.084 26.6764  23
   4  -3  -1 155.340 33.6570  21
  -4  -3   2 17.2731 19.5869  35
  -4   3   2 10.7663 22.1346  13
   4  -3  -2 23.0447 24.0438  23
   4  -3  -2 3.97069 22.5888  21
   4  -3  -3 162.095 26.2281  23
   4  -3  -3 143.931 34.1224  21
   4  -3  -4 570.822 37.5181  23
   4  -3  -4 532.091 48.1945  21
   4  -3  -5 244.097 28.6761  23
   4  -3  -5 192.117 33.5013  21
   4  -3  -6 102.499 24.6463  23
   4  -3  -6 73.0007 27.9551  21
   4  -3  -7 882.007 48.2337  23
   4  -3  -7 826.974 59.5570  21
  -4  -3   8 37.4767 28.9637  37
  -4  -3   9 16.5297 27.2731  37
  -4  -3   9 2.25518 23.5435  24
  -4  -3  10 77.4627 28.3883  37
  -4  -3  11 103.380 28.1286  37
  -4  -3  12 455.139 38.0873  37
  -4  -3  13 110.390 27.0127  37
   4   3 -14 124.734 17.6649  38
  -4  -3  14 86.2956 25.1190  37
  -4  -3  15 5.14243 21.2356  37
   4  -3 -15 42.0996 17.0861  23
  -4  -3  16 113.243 22.3087  37
   4  -3 -16 171.032 18.9026  23
   4  -3 -17-0.97976 11.1944  23
  -4  -4 -15 493.562 23.6972  34
  -4  -4 -14 859.220 36.9957  34
  -4   4 -14 929.869 36.4568  22
  -4   4 -13 322.870 21.2230  36
  -4  -4 -13 282.191 21.6470  34
  -4   4 -12 52.9533 14.6839  36
  -4  -4 -12 44.7440 17.0336  34
  -4   4 -11 211.210 20.6125  36
  -4  -4 -11 191.767 21.3178  34
  -4   4 -10 70.8514 16.8499  36
  -4  -4 -10 60.8473 18.3905  34
  -4   4  -9 27.3466 16.3183  36
  -4  -4  -9 11.3709 16.9234  34
  -4   4  -8 22.0612 16.4507  36
  -4  -4  -8 8.35432 16.5576  34
   4  -4   8-16.3340 17.0235  33
  -4   4  -7 74.4925 18.9653  36
  -4  -4  -7 67.9839 18.7051  34
   4  -4   7 57.4632 19.9818  33
  -4   4  -6 2024.67 77.9242  36
  -4  -4  -6 2172.63 79.6547  34
   4  -4   6 2081.98 79.5240  33
  -4   4  -5 122.363 21.4831  36
  -4  -4  -5 97.2180 20.7583  34
   4  -4   5 129.138 21.0379  33
  -4  -4  -4 6295.56 194.373  35
  -4  -4  -4 5908.31 196.260  34
   4  -4   4 5891.06 195.137  33
  -4  -4  -3 1703.80 64.7676  35
  -4  -4  -3 1597.57 66.6627  34
   4  -4   3 1576.65 63.8522  28
  -4  -4  -2 344.613 27.2804  35
  -4  -4  -2 311.023 28.0651  34
  -4  -4  -1 124.367 21.0279  35
  -4  -4  -1 98.1331 22.0872  34
  -4  -4  -1 143.056 25.7753  27
  -4  -4   0 63.9157 18.6409  35
  -4  -4   0 52.0051 23.4596  27
  -4  -4   1 94.0156 25.0313  27
   4  -4  -2 260.427 31.7422  23
  -4  -4   2 259.647 31.2665  27
   4  -4  -3 1552.11 69.9491  23
  -4  -4   3 1479.97 69.1111  27
   4  -4  -4 6256.16 207.811  23
  -4  -4   4 6251.04 208.625  27
   4  -4  -5 123.493 26.2826  23
  -4  -4   5 143.587 28.3545  27
   4  -4  -6 2312.39 88.7968  23
  -4  -4   6 2135.31 84.9488  29
   4  -4  -7 57.0495 22.3884  23
  -4  -4   7 75.1157 21.3185  29
  -4  -4   8 4.77033 26.7151  37
   4  -4  -8 12.8827 20.6543  23
  -4  -4   9 11.5723 27.1853  37
   4  -4  -9 18.6621 21.3677  23
  -4  -4  10 66.2631 25.6171  37
   4  -4 -10 49.2892 20.3248  23
  -4  -4  11 134.520 26.9864  37
   4  -4 -11 231.430 25.0982  23
  -4  -4  12 19.0104 23.4323  37
   4  -4 -12 53.4359 19.0743  23
   4   4 -13 373.218 24.1487  38
  -4  -4  13 304.087 29.7738  37
   4  -4 -13 374.705 26.6055  23
   4   4 -14 1010.78 41.2314  38
   4  -4 -14 1015.35 43.0022  23
   4  -4 -15 498.372 25.9210  23
   4   4 -15 500.854 24.4017  38
   4  -5  13 209.482 19.6809  25
  -4  -5 -13 182.785 13.9168  34
  -4   5 -13 209.121 14.8170  22
   4  -5  12 107.398 19.5115  25
  -4  -5 -12 93.3070 13.4341  34
  -4   5 -12 130.344 13.7637  22
   4  -5  11 155.956 21.9922  25
  -4  -5 -11 150.795 15.9980  34
   4  -5  10 75.9840 21.6937  25
  -4  -5 -10 70.1490 15.0995  34
   4  -5   9-3.66281 20.6574  25
  -4  -5  -9 30.7862 15.4721  34
   4  -5   8 62.1398 23.5912  25
  -4  -5  -8 44.3599 16.3479  34
   4  -5   7 494.623 35.6883  25
  -4  -5  -7 493.794 29.9346  34
  -4   5  -6 26.8738 15.3920  36
   4  -5   6 35.1474 23.5351  25
  -4  -5  -6 27.9227 16.7957  34
  -4   5  -5 17.9021 16.2569  36
   4  -5   5 22.9260 23.4012  25
  -4  -5  -5 14.5484 16.7948  34
   4  -5   4 399.937 33.6848  25
  -4   5  -4 451.555 29.1807  36
  -4  -5  -4 401.978 29.0783  34
  -4  -5  -3 56.9268 18.7293  34
  -4  -5  -2 953.357 46.0326  34
  -4  -5  -1 41.4177 19.7915  34
  -4  -5   0 23.8428 18.8072  34
  -4  -5   1 59.5983 20.4645  34
  -4  -5   1 65.3038 23.4900  27
  -4  -5   2 909.251 48.7448  27
  -4  -5   3 25.1601 23.2810  27
  -4  -5   4 344.341 33.2772  27
  -4  -5   5 51.9413 23.5295  27
  -4  -5   6 32.4629 22.8977  27
  -4  -5   7 478.307 35.5055  27
  -4  -5   8 42.4039 22.1287  27
  -4  -5   9 15.3840 19.3222  27
   4   5 -10 94.5137 15.2247  38
  -4  -5  10 76.1491 20.1075  27
   4   5 -11 162.771 16.3472  38
  -4  -5  11 152.092 21.1025  27
   4   5 -12 131.413 14.0303  38
  -4  -5  12 130.574 18.2410  27
   4   5 -13 173.045 14.2002  38
  -4  -5  13 178.355 18.3360  27
   4  -6   9 9.91452 13.0939  25
  -4  -6  -9 15.6930 9.42485  34
   4  -6   8 212.355 19.6577  25
  -4  -6  -8 187.218 15.1347  34
   4  -6   7 74.6180 16.8262  25
  -4  -6  -7 74.1359 12.7982  34
   4  -6   6 69.0043 16.9906  25
  -4  -6  -6 64.1881 13.3347  34
   4  -6   5 101.753 18.4456  25
  -4  -6  -5 48.2640 13.3289  34
   4  -6   4 184.516 21.5759  25
  -4  -6  -4 209.587 18.6365  34
   4  -6   3 8.71928 16.3168  25
  -4  -6  -3 15.1965 13.6652  34
  -4  -6  -2 50.2759 15.2877  34
  -4  -6  -1 512.452 28.8686  34
  -4  -6   0 57.1624 15.8114  34
  -4  -6   1 461.283 28.1168  34
  -4  -6   2 35.0199 16.1769  34
  -4  -6   3 19.2514 15.5846  34
  -4  -6   4 172.779 18.9220  34
  -4  -6   5 84.4621 16.2259  34
  -4  -6   5 69.7602 17.7390  27
  -4  -6   6 48.0127 14.4810  34
  -4  -6   6 65.3905 17.5075  27
  -4  -6   7 95.9356 16.8026  27
  -4  -6   8 200.649 18.8895  27
  -4  -6   9 3.98449 9.88404  34
  -4  -6   9 3.72678 12.1987  27
  -5   0 -17-6.92319 13.1386  31
  -5   0 -16 132.237 18.8944  31
  -5   0 -15 8.64545 13.8974  32
  -5   0 -14 203.388 20.8823  32
  -5   0 -13 1.51192 15.3668  32
  -5   0 -12 494.059 30.5535  32
  -5   0 -11 17.6388 16.7477  32
  -5   0 -10 1153.29 50.0540  32
  -5   0  -9 20.4591 16.1816  32
  -5   0  -8 1362.22 54.7141  32
   5   0   8 1206.63 69.5444  17
  -5   0  -7 7.44539 15.9866  32
  -5   0  -7 23.7878 19.9133  10
   5   0   7-3.31907 22.5068  17
  -5   0  -6 23.1523 16.3951  32
  -5   0  -6 20.2621 19.8727  10
   5   0   6-3.08536 21.6860  17
  -5   0  -5 14.2121 19.9740  10
   5   0   5-14.3583 20.9756  17
  -5   0  -4 339.496 33.3951  10
   5   0   4 379.716 27.5137  28
  -5   0  -3 2.66590 17.9667  10
   5   0   3-18.7365 18.1880  28
  -5   0  -2 578.494 38.6144  10
   5   0   2 543.903 31.6262  28
   5   0   1-4.70163 17.9844  30
  -5   0  -1-9.90998 18.5718  10
   5   0   1 5.97821 16.5103  28
  -5   0   0 12.0649 20.6543  39
   5   0   0-9.40207 17.8264  30
  -5   0   0-7.16910 17.2688  10
   5   0  -1 1.56991 17.5032  30
  -5   0   1 3.50524 20.4130  39
   5   0  -2 560.767 32.9885  30
  -5   0   2 521.417 35.4789  39
  -5   0   3 25.7457 26.0030  20
   5   0  -3 31.8458 16.8945  30
  -5   0   3 9.22867 21.4187  39
   5   0  -4 381.150 26.9997  38
   5   0  -4 389.679 27.9122  30
  -5   0   4 343.085 40.0299  20
  -5   0   4 391.567 33.6191  39
   5   0  -5 1.57516 15.6548  38
  -5   0   5 2.01493 23.4688  39
  -5   0   5-8.26769 26.4271  20
   5   0  -5-17.9303 17.8393  30
   5   0  -6 26.8941 16.1244  38
  -5   0   6-4.34945 26.4192  20
   5   0  -6 4.95920 18.0486  30
  -5   0   6-23.2119 26.6976  39
  -5   0   7 10.9924 25.3394  39
   5   0  -7 20.6533 14.8098  38
  -5   0   7-9.18032 27.0117  20
  -5   0   8 1098.24 73.3574  20
  -5   0   8 1293.33 62.1923  39
  -5   0   9-11.7148 26.3617  39
  -5   0  10 1087.15 56.6953  39
  -5   0  11 2.35759 26.0440  39
  -5   0  12 446.006 37.5556  39
  -5   0  13 30.7487 24.3359  39
  -5   0  14 202.264 27.9675  39
  -5   0  15 53.8602 22.9618  39
  -5   0  16 123.295 23.0583  39
  -5   0  17-1.35011 17.4999  39
  -5   1 -17 36.8016 12.6531  31
  -5  -1 -17 69.7382 13.4658  31
   5  -1  17 29.8544 16.8226  29
  -5   1 -16 78.0946 13.8034  36
  -5   1 -16 105.525 16.8005  31
  -5  -1 -16 81.9728 16.1474  31
  -5   1 -15 9.00537 13.0837  36
  -5   1 -15-2.50399 13.8631  32
  -5   1 -14 206.623 20.0868  36
  -5   1 -14 192.889 20.5447  32
  -5   1 -13 20.6762 14.9125  36
  -5   1 -13 10.8011 16.0729  32
  -5   1 -12 303.017 23.8059  36
  -5   1 -12 320.175 26.3261  32
  -5   1 -11 155.816 20.2355  36
  -5   1 -11 160.998 21.9427  32
  -5  -1 -11 157.986 20.1092  32
  -5   1 -10 1404.13 57.4112  36
  -5   1 -10 1506.29 60.1541  32
  -5  -1 -10 1509.69 59.2824  32
  -5   1  -9-6.37475 16.3753  32
  -5  -1  -9-1.54865 15.9553  32
  -5   1  -8 81.7500 18.0649  32
  -5  -1  -8 87.7825 18.2229  32
  -5   1  -7 675.839 36.2664  32
  -5  -1  -7 828.300 38.6104  32
  -5   1  -7 720.521 48.1501  10
   5   1   7 818.449 53.8114  17
   5   1   6 10.3627 24.5510  17
  -5   1  -6-2.83940 16.0082  32
  -5   1  -6 3.00647 20.5109  10
   5  -1   6 5.30140 17.3076  28
  -5   1  -5 188.119 20.6008  32
  -5   1  -5 188.061 28.4577  10
   5  -1   5 158.415 22.2078  28
   5   1   5 140.513 29.2580  17
  -5   1  -4 3005.56 112.414  10
   5  -1   4 2797.35 100.754  28
  -5   1  -3 1657.18 73.4572  10
  -5  -1  -3 1554.73 70.1253  10
   5  -1   3 1541.88 62.0911  28
  -5   1  -2 59.7082 23.8831  13
   5  -1   2 59.1336 17.7769  30
  -5  -1  -2 47.2420 19.4303  10
   5  -1   2 34.5694 16.8571  28
  -5  -1  -1 1066.30 47.7059  35
   5  -1   1 1027.48 47.2724  30
   5  -1   1 1012.95 45.0413  28
  -5  -1   0 60.0022 22.9066  35
   5  -1   0 30.9104 18.8958  30
   5   1   0 63.4514 20.7259  30
   5  -1   0 57.3113 17.1751  28
  -5  -1   0 62.8957 24.1109  39
   5   1  -1 1054.30 46.7383  38
  -5  -1   1 977.172 48.5304  35
  -5   1   1 1101.84 63.6491  20
   5  -1  -1 1050.59 47.4042  30
   5   1  -1 1084.79 47.7859  30
   5  -1  -1 1094.33 45.4833  28
  -5  -1   1 1080.39 51.2826  39
   5   1  -2 71.5111 17.9105  38
  -5  -1   2 63.2807 22.7407  35
  -5   1   2 43.2649 26.4135  20
   5  -1  -2 75.2880 20.2101  30
   5   1  -2 57.5650 18.3794  30
   5  -1  -2 76.4049 16.5368  28
  -5  -1   2 73.0229 25.3630  39
   5   1  -3 1662.85 64.7502  38
  -5  -1   3 1422.10 65.2187  35
   5  -1  -3 1722.23 84.1273  21
  -5   1   3 1715.63 84.3544  20
   5  -1  -3 1728.12 65.4623  30
   5   1  -3 1645.50 64.9417  30
  -5  -1   3 1688.69 69.6298  39
   5   1  -4 3053.70 103.283  38
  -5   1   4 2838.13 123.774  20
   5  -1  -4 3006.53 103.782  30
   5   1  -4 2704.35 102.816  30
  -5  -1   4 3041.31 108.813  39
   5   1  -5 164.290 20.8671  38
  -5  -1   5 170.749 29.8050  39
  -5   1   5 129.606 33.6889  20
   5  -1  -5 171.194 22.4766  30
   5   1  -5 172.733 22.4986  30
   5   1  -6 23.0048 15.9532  38
   5   1  -6 37.5063 23.8117  14
  -5   1   6-18.6246 28.4998  20
   5   1  -6-6.76462 16.6151  30
  -5  -1   6 13.5697 26.0103  39
   5   1  -7 723.440 37.6566  38
   5   1  -7 716.678 53.6821  14
  -5   1   7 649.545 57.8484  20
  -5  -1   7 664.615 46.4045  39
  -5  -1   8 73.2556 29.5694  39
   5   1  -8 71.8738 16.9831  38
  -5  -1   9-12.4080 29.0249  39
   5   1  -9-6.70101 15.6642  38
   5   1 -10 1319.68 56.3892  38
  -5  -1  10 1427.33 66.2098  39
  -5  -1  11 168.297 30.8229  39
  -5  -1  12 317.333 34.8902  39
  -5  -1  13-11.0924 24.1651  39
  -5  -1  14 169.888 27.0035  39
  -5  -1  15 3.65908 20.5834  39
  -5  -1  16 98.8761 21.5578  39
  -5  -1  17 55.3409 18.0803  39
  -5   2 -16 96.8832 13.7672  36
   5  -2  16 98.6934 18.2363  29
  -5   2 -15 91.3003 15.3923  36
  -5  -2 -15 76.5164 14.8454  34
   5  -2  15 68.2573 19.8886  29
  -5   2 -14 210.574 19.7002  36
  -5  -2 -14 202.528 20.0463  34
  -5   2 -13 6.78779 14.7505  36
  -5  -2 -13 5.49590 15.5270  34
  -5   2 -13-10.2289 15.5691  32
  -5   2 -12 26.2224 15.9166  36
  -5  -2 -12 13.2506 16.1619  34
   5  -2  12 27.9841 19.1270  33
  -5   2 -12 17.2273 16.2324  32
  -5   2 -11-9.10235 15.2914  36
  -5  -2 -11-3.06548 17.2827  34
   5  -2  11-3.86316 18.1174  33
  -5   2 -11 19.2803 15.5957  32
  -5   2 -10 176.431 21.0963  36
   5  -2  10 157.468 23.4053  33
  -5   2 -10 145.452 19.9329  32
  -5   2  -9 1.55163 16.4909  36
   5  -2   9-7.65196 19.1746  33
  -5   2  -9 9.54098 15.9839  32
   5  -2   9 14.2058 19.7584  28
  -5   2  -8 86.2903 17.3642  36
  -5   2  -8 73.9339 17.1625  32
   5  -2   8 101.718 21.4523  28
  -5   2  -7 42.6332 17.1576  36
   5  -2   7 21.1840 18.5491  28
  -5   2  -6 66.0984 17.7612  36
   5  -2   6 47.9010 19.1583  28
  -5   2  -5 96.6162 19.3513  36
  -5  -2  -5 78.1537 19.5829  35
  -5  -2  -5 116.968 25.3662  11
  -5   2  -5 94.0402 24.5980  10
   5  -2   5 107.109 19.4303  28
  -5   2  -4 115.676 19.0092  36
  -5  -2  -4 92.3957 19.7128  35
  -5   2  -4 105.446 27.0195  13
   5  -2   4 105.481 19.7467  28
  -5  -2  -3 440.048 29.3203  35
  -5   2  -3 403.397 40.3433  13
   5  -2   3 432.413 29.6105  28
  -5  -2  -2 1725.98 68.7332  35
  -5   2  -2 1789.05 84.7741  13
   5  -2   2 1781.08 67.6839  28
  -5  -2  -1 133.002 22.7837  35
  -5   2  -1 181.536 31.6391  13
   5  -2   1 150.508 22.6977  30
   5  -2   1 139.379 18.8247  28
  -5  -2   0 5.06371 20.6226  35
  -5   2   0-3.87802 23.1899  13
   5  -2   0-19.5026 23.6579  23
   5  -2   0-5.27719 18.4587  30
   5  -2   0 8.63092 14.2131  28
  -5  -2   1 151.504 25.5193  39
  -5  -2   1 129.173 24.6160  35
   5  -2  -1 155.110 26.3193  23
   5  -2  -1 117.606 21.1696  30
   5   2  -2 1687.63 67.8167  38
  -5  -2   2 1784.60 71.7196  35
   5  -2  -2 1892.46 74.4158  23
   5  -2  -2 1589.66 87.7303  21
  -5  -2   2 1859.48 74.1998  39
  -5   2   2 1762.07 90.4516  20
   5  -2  -2 1849.12 70.6784  30
   5   2  -3 413.685 29.0439  38
  -5  -2   3 394.178 32.9147  35
   5  -2  -3 399.448 34.4055  23
   5  -2  -3 405.567 46.1950  21
   5  -2  -3 391.488 30.1252  30
  -5   2   3 405.523 46.1327  20
  -5  -2   3 481.393 36.2556  39
   5   2  -4 94.1804 19.6688  38
  -5  -2   4 94.7391 24.7056  35
   5  -2  -4 113.438 24.7023  23
   5  -2  -4 105.414 34.1403  21
  -5   2   4 47.2414 31.7770  20
   5  -2  -4 100.813 20.8185  30
  -5  -2   4 151.266 27.5044  39
   5   2  -5 95.7382 19.9328  38
  -5  -2   5 84.7661 25.2845  35
   5  -2  -5 97.5696 24.3246  23
   5  -2  -5 61.4258 30.5285  21
  -5   2   5 63.6624 32.0593  20
  -5  -2   5 112.288 27.8227  39
   5   2  -6 56.4480 17.8527  38
  -5  -2   6 73.6792 24.0342  35
   5  -2  -6 64.3324 23.5598  23
   5  -2  -6 107.125 31.6261  21
  -5   2   6 80.9022 33.4923  20
  -5  -2   6 69.9995 26.2747  39
  -5  -2   7 64.3496 23.8725  35
   5  -2  -7 41.1131 22.4708  23
   5   2  -7 83.6284 17.9086  38
   5   2  -7 29.2320 19.4364  30
  -5  -2   7 48.0069 27.5333  39
   5   2  -8 92.7392 18.6729  38
  -5  -2   8 103.176 23.8902  35
   5  -2  -8 91.1288 23.8455  23
  -5  -2   8 77.8816 27.8816  39
   5   2  -9-7.08933 16.0788  38
   5  -2  -9 10.7609 20.7012  23
  -5  -2   9 21.8779 28.0151  39
   5  -2 -10 153.757 25.0451  23
   5   2 -10 154.905 21.1384  38
  -5  -2  10 145.955 30.0171  39
   5   2 -11-6.72507 15.7742  38
  -5  -2  11-27.6382 25.2675  39
   5   2 -12 44.4533 16.0530  38
   5  -2 -12 53.5220 19.9431  23
  -5  -2  12 23.8913 24.0266  39
   5   2 -13 36.3036 15.1510  38
   5  -2 -13 17.5943 18.2970  23
  -5  -2  13 50.0999 23.8915  39
   5  -2 -14 198.161 22.5616  23
  -5  -2  14 217.827 26.4833  39
   5  -2 -15 90.6671 17.1693  23
  -5  -2  15 85.1579 21.1822  39
   5  -2 -16 140.136 16.9407  23
  -5  -2  16 115.155 19.4334  39
  -5   3 -15 5.66680 10.4927  36
  -5  -3 -15 38.5288 11.6852  34
  -5   3 -14 136.927 15.7438  36
  -5  -3 -14 132.975 15.8107  34
  -5   3 -13 198.503 18.4317  36
  -5  -3 -13 163.278 18.2698  34
  -5   3 -12 336.856 23.3038  36
  -5  -3 -12 261.802 22.8401  34
   5  -3  12 264.681 25.3823  33
  -5   3 -11 42.6154 16.2460  36
  -5  -3 -11 33.0915 16.2015  34
   5  -3  11 59.7134 19.4889  33
  -5   3 -10 61.5476 17.2726  36
  -5  -3 -10 88.9014 18.6264  34
   5  -3  10 89.5872 19.5704  33
  -5   3  -9 262.415 23.6742  36
  -5  -3  -9 255.109 23.5155  34
   5  -3   9 241.398 25.4063  33
  -5   3  -8 104.159 19.3999  36
  -5  -3  -8 81.4080 18.2900  34
   5  -3   8 100.005 20.6433  33
   5  -3   8 89.1974 20.5338  28
  -5   3  -7 34.1568 18.4296  36
  -5  -3  -7 3.14200 16.1507  34
   5  -3   7 5.47775 17.7318  33
   5  -3   7 40.1509 19.8623  28
  -5   3  -6 163.270 21.5113  36
  -5  -3  -6 129.967 20.0013  35
   5  -3   6 128.383 21.6751  33
   5  -3   6 100.510 22.2009  28
  -5   3  -5 628.087 35.9047  36
  -5  -3  -5 645.274 35.6383  35
   5  -3   5 664.860 36.9320  33
   5  -3   5 625.708 36.5058  28
  -5  -3  -4 1158.29 48.8386  35
   5  -3   4 1116.90 48.4499  33
   5  -3   4 1057.62 48.2973  28
  -5  -3  -3-3.22310 17.6778  35
   5  -3   3 3.32735 16.3422  28
  -5  -3  -2 136.908 22.0503  35
   5  -3   2 139.094 19.3673  28
  -5  -3  -1 123.284 22.3379  35
  -5  -3   0 27.6634 20.4727  35
  -5   3   0-16.7814 25.0884  13
  -5  -3   1 120.082 22.5511  35
  -5   3   1 154.422 31.0090  13
   5  -3  -1 70.6350 26.4218  23
  -5  -3   2 151.204 25.0699  35
   5  -3  -2 98.0691 27.7648  23
  -5  -3   3 20.0389 21.0003  35
   5  -3  -3 11.7962 24.3107  23
  -5  -3   4 1105.98 52.3597  35
   5  -3  -4 1140.71 56.8285  23
   5   3  -5 691.760 38.0126  38
  -5  -3   5 661.115 40.0287  35
   5  -3  -5 656.194 43.3795  23
   5   3  -6 153.386 21.2222  38
   5  -3  -6 91.7441 24.6662  23
   5   3  -7 16.6084 16.7482  38
   5  -3  -7 15.8103 22.4509  23
   5   3  -8 83.7174 19.5355  38
   5  -3  -8 136.564 25.0798  23
   5   3  -9 272.583 24.7606  38
   5  -3  -9 301.485 30.0799  23
   5   3 -10 116.880 19.0789  38
   5  -3 -10 100.727 21.8152  23
   5   3 -11 7.94990 14.9715  38
   5  -3 -11 37.5405 19.9563  23
   5   3 -12 307.277 23.3861  38
   5  -3 -12 342.378 27.4053  23
   5   3 -13 227.318 20.0863  38
   5  -3 -13 273.972 23.8173  23
   5   3 -14 149.718 15.8625  38
   5  -3 -14 127.068 17.3072  23
   5  -3 -15 11.8393 12.5144  23
  -5   4 -13 2.39576 10.7120  36
  -5  -4 -13-1.71625 10.3440  34
  -5   4 -12 11.5619 11.9634  36
  -5  -4 -12 28.6720 12.8758  34
  -5   4 -11 4.43681 12.6736  36
  -5  -4 -11-9.31184 13.8378  34
  -5   4 -10 4.93027 13.4252  36
  -5  -4 -10 3.83710 13.5598  34
  -5   4  -9 161.932 19.1799  36
  -5  -4  -9 192.068 19.7891  34
  -5   4  -8 151.399 18.9401  36
  -5  -4  -8 109.986 18.4216  34
  -5   4  -7 350.571 26.3471  36
  -5  -4  -7 384.400 26.5348  34
   5  -4   7 361.669 27.8524  33
  -5   4  -6 492.753 30.8572  36
  -5  -4  -6 494.524 30.5991  34
   5  -4   6 526.667 32.3948  33
  -5   4  -5 16.2762 16.9493  36
  -5  -4  -5 7.95114 16.8180  34
   5  -4   5 5.05547 17.5483  33
  -5   4  -4 70.0232 20.4153  36
  -5  -4  -4 46.6607 18.4484  35
  -5  -4  -4 73.0583 19.1956  34
  -5  -4  -3 1979.74 74.1550  35
  -5  -4  -3 1944.79 74.4769  34
   5  -4   3 1981.55 73.9682  28
  -5  -4  -2 322.832 26.3517  35
  -5  -4  -2 336.542 26.8736  34
  -5  -4  -1 688.031 36.8498  35
  -5  -4   0 31.8134 19.0094  35
  -5  -4   1 611.860 34.7883  35
  -5  -4   2 327.939 26.6673  35
   5  -4  -3 2065.63 85.7854  23
   5  -4  -4 100.469 26.1600  23
   5  -4  -5 22.7058 22.9603  23
   5  -4  -6 506.388 36.3130  23
   5   4  -7 399.106 27.5530  38
   5  -4  -7 377.010 31.8960  23
   5   4  -8 135.881 19.6051  38
   5  -4  -8 148.253 23.8665  23
   5   4  -9 183.150 20.1733  38
   5  -4  -9 205.887 24.1041  23
   5   4 -10 1.40404 13.3801  38
   5  -4 -10-5.03089 18.1772  23
   5   4 -11-5.08962 12.6087  38
   5  -4 -11 4.49033 16.3413  23
   5   4 -12 32.4916 12.1156  38
   5  -4 -12 23.3860 14.5761  23
   5   4 -13 3.78676 10.3361  38
   5  -4 -13 3.26258 12.4801  23
  -5  -5 -11 1.42349 9.62232  34
  -5   5 -11 2.81199 8.37441  22
  -5   5 -10 106.511 12.3351  36
  -5  -5 -10 102.022 13.4102  34
  -5   5  -9 45.2777 11.8955  36
  -5  -5  -9 48.5688 12.3023  34
  -5   5  -8 534.681 26.7922  36
  -5  -5  -8 586.626 27.8188  34
  -5   5  -7 59.5967 14.5413  36
  -5  -5  -7 64.1997 14.7504  34
  -5   5  -6 9.57500 13.5923  36
  -5  -5  -6 19.9993 14.0058  34
  -5   5  -5 223.017 19.4904  36
  -5  -5  -5 206.229 19.9144  34
  -5   5  -4 32.5371 14.7234  36
  -5  -5  -4 29.0125 15.3949  34
  -5   5  -3-8.54436 15.7330  36
  -5  -5  -3-7.17935 14.6357  34
  -5   5  -2 29.5198 16.1696  36
  -5  -5  -2 20.7112 15.8578  34
  -5  -5  -1 28.7232 16.4084  34
  -5  -5   0 12.2447 16.1066  34
  -5  -5   1 24.5811 16.6686  34
  -5  -5   2-4.57850 15.7238  34
  -5  -5   3 5.10614 19.1064  27
  -5  -5   4 31.9001 19.6592  27
  -5  -5   5 193.924 23.9920  27
  -5  -5   6 38.8099 18.9296  27
  -5  -5   7 8.69663 17.1639  27
  -5  -5   8 501.512 30.1712  27
   5   5  -9 40.6641 14.1740  30
  -5  -5   9 49.4776 15.5308  27
   5   5 -10 100.677 12.1429  38
  -5  -5  10 98.6311 16.1768  27
  -5  -6  -6 46.9679 9.80895  34
  -5  -6  -5 45.6593 10.6293  34
  -5  -6  -4 155.879 14.0559  34
  -5  -6  -3 7.23518 11.2600  34
  -5   6  -2-2.64592 10.7759  36
  -5  -6  -2 0.94450 10.9083  34
  -5   6  -1 12.0867 11.3183  36
  -5  -6  -1 1.94139 11.4954  34
  -5   6   0 14.3910 11.4897  36
  -5  -6   0 26.5270 11.8812  34
  -5   6   1 8.76427 12.3033  36
  -5  -6   1 14.6431 11.6572  34
  -5  -6   2 0.95092 11.1217  34
  -5  -6   3 12.7197 10.7206  34
  -5  -6   4 93.6180 12.4196  34
   5   6  -5 36.4516 11.8112  30
   5   6  -6 72.0222 12.1176  30
  -6   0 -15-12.3856 10.3786  32
  -6   0 -14 77.2278 13.7416  32
  -6   0 -13-21.8264 13.7791  32
  -6   0 -12 108.645 16.7921  32
  -6   0 -11-5.77293 14.7500  32
  -6   0 -10 329.451 24.7112  32
  -6   0  -9 12.5241 16.5163  32
  -6   0  -8 885.385 42.2271  32
  -6   0  -7 15.9676 16.1913  32
  -6   0  -6 1636.77 64.4977  32
  -6   0  -5 15.9113 16.2352  32
   6   0   5 41.8824 19.7333  28
  -6   0  -4 904.619 42.1049  32
   6   0   4 797.320 43.0783  28
   6   0   3 3.72546 18.2979  28
   6   0   2 3.68415 17.6641  28
   6   0   1 5.84904 19.9794  30
   6   0   1 5.46091 17.6699  28
   6   0   0 300.404 30.1001  30
   6   0   0 372.115 28.4651  28
   6   0  -1 3.90103 19.0470  30
   6   0  -1 1.77273 17.1556  28
   6   0  -2 25.2825 21.7324  30
   6   0  -2-1.74343 17.8169  28
  -6   0   2-14.5779 23.4298  39
  -6   0   3 13.4968 23.6115  35
   6   0  -3 19.3773 19.5972  30
  -6   0   3 29.8692 24.3327  39
   6   0  -3 25.6536 16.3622  28
   6   0  -4 974.277 48.1080  30
   6   0  -4 984.711 46.1294  28
  -6   0   4 1059.30 52.9427  39
   6   0  -5 40.2669 18.8207  30
  -6   0   5 44.7165 24.9583  39
   6   0  -6 1778.38 71.3738  30
  -6   0   6 1794.75 75.5324  39
  -6   0   7 4.58358 24.6612  39
  -6   0   8 980.269 52.2823  39
  -6   0   9 6.69827 24.6082  39
  -6   0  10 333.948 32.5204  39
  -6   0  11-8.08763 21.5437  39
  -6   0  12 145.781 24.6605  39
  -6   0  13 46.2767 19.9306  39
  -6   0  15-15.9586 15.6784  35
  -6   1 -15 824.109 33.5297  31
  -6   1 -14 373.824 22.1027  32
  -6   1 -13 282.009 21.1140  32
  -6   1 -12 404.405 26.2187  32
  -6  -1 -12 450.192 25.3257  32
   6  -1  11 494.268 32.8991  33
  -6   1 -11 477.712 29.0858  32
  -6  -1 -11 468.792 28.0236  32
  -6   1 -10 212.468 21.3817  32
  -6  -1 -10 203.297 20.8039  32
  -6   1  -9 572.338 32.3107  32
  -6  -1  -9 562.428 31.7607  32
  -6   1  -8 49.8058 17.6864  32
  -6  -1  -8 47.1959 17.6781  32
  -6   1  -7 122.861 18.4884  32
  -6  -1  -7 64.3058 17.9923  32
   6  -1   7 76.1068 21.5159  28
  -6   1  -6 154.082 19.7090  32
  -6  -1  -6 122.366 19.8216  32
   6  -1   6 116.126 20.8843  28
   6  -1   5 608.510 36.3347  28
   6  -1   4 667.163 38.1422  28
   6  -1   3 66.2522 20.1931  28
   6   1   3 33.7783 19.7463  28
   6  -1   2 415.464 32.6074  30
   6  -1   2 412.167 29.6792  28
   6   1   2 361.558 29.9995  28
   6  -1   1 1053.05 49.7001  30
   6  -1   1 1021.96 47.4022  28
   6   1   1 990.743 48.1760  28
  -6  -1   0 1056.27 51.2537  35
   6  -1   0 1057.60 51.2682  30
   6   1   0 1043.71 50.0211  30
   6  -1   0 1069.40 48.9095  28
  -6  -1   1 985.712 50.2621  35
   6  -1  -1 991.303 50.0595  30
   6   1  -1 1047.18 49.8976  30
   6  -1  -1 1108.38 47.9134  28
  -6  -1   2 429.951 35.4582  35
   6  -1  -2 416.068 33.0751  30
   6   1  -2 512.104 34.9868  30
   6  -1  -2 452.682 30.1094  28
  -6  -1   2 544.581 39.0814  39
  -6  -1   3 94.8857 27.3190  35
   6  -1  -3 94.9959 23.6542  30
   6   1  -3 53.9878 20.9388  30
  -6  -1   3 25.0682 24.5386  39
  -6  -1   4 703.134 44.0146  35
   6  -1  -4 700.482 41.4835  30
   6   1  -4 701.953 39.8772  30
   6   1  -5 677.639 38.1957  38
  -6  -1   5 634.188 41.9095  35
   6  -1  -5 703.021 39.4575  30
   6   1  -5 724.338 39.2864  30
  -6  -1   5 721.864 44.8949  39
   6   1  -6 123.427 21.3903  38
  -6  -1   6 160.234 27.3288  35
   6  -1  -6 165.066 22.9711  30
   6   1  -6 106.590 21.8515  30
  -6  -1   6 158.075 29.5444  39
   6   1  -7 117.079 20.1374  38
  -6  -1   7 88.7020 27.2537  35
   6   1  -7 80.6133 20.3342  30
  -6  -1   7 107.344 27.2322  39
   6   1  -8 51.4331 18.6859  38
  -6  -1   8 34.2332 24.2840  35
  -6  -1   8 101.643 29.2768  39
   6   1  -9 576.140 33.5558  38
  -6  -1   9 543.966 37.5921  35
  -6  -1   9 662.200 42.5431  39
   6   1 -10 192.364 20.4491  38
  -6  -1  10 181.321 26.6597  35
  -6  -1  10 234.384 29.8109  39
  -6  -1  11 427.069 33.1360  35
  -6  -1  11 577.168 38.0219  39
  -6  -1  12 402.874 30.0538  35
  -6  -1  12 369.991 31.9013  39
  -6  -1  13 273.315 25.3121  35
  -6  -1  13 315.026 27.3963  39
  -6  -1  14 520.338 31.0457  39
  -6  -1  15 685.816 33.6582  39
  -6   2 -14 28.3690 11.0225  36
  -6   2 -13 67.0825 13.0945  36
  -6   2 -12 46.1021 13.7825  36
   6  -2  12 19.1255 16.6482  33
  -6   2 -12 19.1124 13.8523  32
  -6   2 -11 27.3395 14.0916  36
   6  -2  11 4.87499 17.3275  33
  -6   2 -11 33.8773 14.4105  32
  -6   2 -10 34.5750 14.8357  36
   6  -2  10 19.0701 18.0629  33
  -6   2 -10 12.4869 14.7973  32
  -6   2  -9 33.6236 14.9382  36
   6  -2   9 9.01203 17.4529  33
   6  -2   9 12.7586 17.4338  28
  -6   2  -8 366.971 25.1632  36
   6  -2   8 372.036 29.4764  33
  -6  -2  -8 361.254 25.4595  32
   6  -2   8 367.337 29.0663  28
  -6  -2  -7 30.4957 15.6697  32
   6  -2   7-15.3059 17.9479  28
  -6  -2  -6 829.306 39.2569  32
   6  -2   6 734.708 41.1398  28
   6  -2   5-13.1997 17.9178  28
  -6  -2  -4 61.4179 19.3489  35
   6  -2   4 101.852 21.0140  28
  -6  -2  -3 361.952 28.0376  35
   6  -2   3 351.645 27.9152  28
  -6  -2  -2 466.132 32.1813  35
   6  -2   2 521.517 32.1187  28
  -6  -2  -1 1045.84 48.5897  35
   6  -2   1 963.790 46.1647  28
  -6  -2   0 3.71894 20.8739  35
   6   2   0-7.83533 19.6348  30
   6  -2   0 20.1329 16.1883  28
  -6  -2   1 1077.40 51.8531  35
   6   2  -1 1043.87 50.1051  30
  -6  -2   2 510.851 36.3681  35
   6  -2  -2 512.968 34.3946  30
   6   2  -2 469.296 33.8446  30
   6   2  -3 291.471 26.1471  38
  -6  -2   3 309.759 31.7743  35
   6  -2  -3 237.526 27.4234  30
   6   2  -3 226.791 26.9937  30
  -6  -2   3 247.799 31.0192  39
   6   2  -4 92.9481 20.2703  38
  -6  -2   4 64.5924 24.8401  35
   6  -2  -4 93.0331 20.8739  30
   6   2  -4 88.3320 21.9834  30
  -6  -2   4 84.2901 26.9311  39
   6   2  -5-11.5626 16.8153  38
  -6  -2   5 52.4488 23.8914  35
   6   2  -5 21.3777 19.1540  30
  -6  -2   5 42.7107 25.0330  39
   6   2  -6 824.337 42.1698  38
  -6  -2   6 792.372 44.8592  35
   6   2  -6 846.092 43.4057  30
  -6  -2   6 787.513 47.9387  39
  -6  -2   7 9.60953 22.0093  35
   6   2  -7 9.25602 17.2544  38
   6   2  -7 18.7789 17.4458  30
  -6  -2   7 2.35922 25.6363  39
   6   2  -8 379.770 28.1352  38
  -6  -2   8 366.658 31.6775  35
   6   2  -8 388.728 29.2709  30
  -6  -2   8 392.084 35.6018  39
   6   2  -9 6.77462 16.4973  38
  -6  -2   9 22.6145 21.0572  35
  -6  -2   9 32.8719 23.7596  39
   6   2 -10 11.0662 15.3975  38
  -6  -2  10 19.4110 20.2140  35
  -6  -2  10 16.3458 21.8281  39
   6   2 -11 27.4264 14.9464  38
  -6  -2  11 50.2880 21.9426  39
   6   2 -12 19.1867 13.0101  38
  -6  -2  12 11.6073 19.2384  39
  -6  -2  13 64.5005 18.4883  39
  -6  -2  14 43.2332 16.1849  39
  -6   3 -13 11.7845 10.1167  36
  -6   3 -12 83.9909 12.5695  36
  -6   3 -11 35.0596 12.6386  36
   6  -3  11 32.1180 15.6190  33
  -6   3 -10 532.414 27.5539  36
   6  -3  10 473.769 29.8549  33
  -6   3  -9 827.622 37.0577  36
   6  -3   9 801.285 39.9043  33
  -6   3  -8 286.446 22.9919  36
   6  -3   8 348.601 26.6756  33
  -6   3  -7 15.3095 15.1612  36
   6  -3   7 1.68374 16.7351  33
   6  -3   7 10.3454 17.0388  28
  -6   3  -6 144.592 19.8949  36
   6  -3   6 101.578 21.5279  33
   6  -3   6 161.062 22.5474  28
  -6   3  -5 2344.08 84.3239  36
  -6  -3  -5 2268.62 83.7127  35
   6  -3   5 2415.57 86.9977  33
   6  -3   5 2365.25 86.9502  28
  -6   3  -4 709.787 36.6973  36
  -6  -3  -4 666.617 35.8950  35
   6  -3   4 693.853 37.3741  28
  -6   3  -3 954.188 44.8659  36
  -6  -3  -3 982.379 44.9921  35
   6  -3   3 973.573 45.1732  28
  -6   3  -2 3140.53 111.095  36
  -6  -3  -2 3333.91 113.311  35
   6  -3   2 3246.30 112.766  28
  -6  -3  -1 3356.45 118.108  35
   6  -3   1 3459.88 117.101  28
  -6  -3   0 6745.81 217.196  35
  -6  -3   1 3459.20 120.333  35
   6   3  -1 3437.86 121.561  30
  -6  -3   2 3025.27 108.958  35
   6   3  -2 3096.61 110.488  30
  -6  -3   3 971.693 46.7954  35
   6   3  -3 940.452 47.9893  30
  -6  -3   4 626.444 37.4947  35
   6  -3  -4 654.887 41.2891  23
   6   3  -4 622.930 38.3443  30
   6   3  -5 2358.09 86.9904  38
  -6  -3   5 2260.39 86.7074  35
   6  -3  -5 2308.38 91.4005  23
   6   3  -5 2429.26 88.9604  30
  -6  -3   5 2413.58 91.1334  39
   6   3  -6 130.194 20.4377  38
  -6  -3   6 151.190 23.2625  35
   6  -3  -6 126.995 25.2958  23
   6   3  -6 140.757 23.3766  30
  -6  -3   6 147.452 26.0615  39
   6   3  -7 5.16611 15.6765  38
  -6  -3   7-4.64445 18.0319  35
   6  -3  -7 12.0604 19.1556  23
   6   3  -7 8.87663 17.1810  30
  -6  -3   7-1.95080 21.2984  39
   6   3  -8 331.647 25.3695  38
   6  -3  -8 329.267 28.5755  23
   6   3  -8 343.710 27.0260  30
  -6  -3   8 310.029 29.1717  39
   6   3  -9 734.785 36.5817  38
   6  -3  -9 733.186 39.3585  23
   6   3  -9 754.602 37.9212  30
  -6  -3   9 724.256 39.4498  39
   6   3 -10 513.532 29.4127  38
   6  -3 -10 553.017 32.0261  23
  -6  -3  10 501.848 31.3305  39
   6   3 -11 33.3261 13.4205  38
   6  -3 -11 38.7620 15.7145  23
   6   3 -12 60.4673 13.4143  38
   6  -3 -12 27.3338 13.9330  23
   6  -3 -13 12.7108 12.0875  23
  -6   4 -11 89.3906 11.6027  36
  -6  -4 -11 65.9049 11.2226  34
  -6   4 -10 6.74000 10.5164  36
  -6  -4 -10 23.8830 10.6482  34
  -6   4  -9 25.8854 11.8271  36
  -6   4  -8 18.0518 12.2231  36
  -6   4  -7 213.356 18.7135  36
  -6   4  -6 82.6465 15.8241  36
  -6   4  -5 307.209 22.4291  36
  -6   4  -4 41.0276 15.5708  36
  -6   4  -3 160.237 19.6437  36
  -6  -4  -3 131.504 18.1888  35
  -6   4  -2 259.211 23.1586  36
  -6  -4  -2 277.634 22.6590  35
  -6   4  -1 106.834 18.6153  36
  -6  -4  -1 136.526 19.2297  35
  -6  -4   0 85.7071 17.8622  35
  -6  -4   1 84.1349 18.5246  35
   6   4  -1 98.9602 20.6284  30
  -6  -4   2 215.751 21.6304  35
   6   4  -2 211.919 24.4215  30
  -6  -4   3 150.781 19.4942  35
   6   4  -3 118.227 21.1111  30
   6   4  -4 67.1692 19.3483  30
   6   4  -5 266.754 24.2705  30
   6   4  -6 111.466 19.2101  30
   6   4  -7 255.950 23.3307  30
   6   4  -8 4.89173 12.3761  38
   6   4  -8 47.7621 15.9417  30
   6   4  -9-8.89269 11.5739  38
   6  -4  -9-1.33573 15.1284  23
   6   4  -9 10.4586 13.7871  30
   6   4 -10 12.7575 10.4346  38
   6  -4 -10 8.11031 13.0097  23
   6   4 -11 57.4232 10.8117  38
  -6   5  -7-0.73053 9.11128  36
  -6  -5  -7 10.0465 9.47363  34
  -6   5  -6 414.842 21.3010  36
  -6  -5  -6 407.798 20.6352  34
  -6   5  -5 19.7065 11.0425  36
  -6   5  -4 262.219 18.3784  36
  -6   5  -3 13.3015 12.9967  36
  -6   5  -2 6.42251 12.3376  36
  -6   5  -1 47.5268 13.9798  36
  -6   5   0 59.6143 14.5631  36
  -6   5   1 41.7712 13.4513  36
   6   5  -3 18.5301 14.1864  30
   6   5  -4 344.776 23.2257  30
   6   5  -5 40.7708 13.9419  30
   6   5  -6 345.625 22.0588  30
   6   5  -7-3.72152 11.4109  30
  -7   0 -13-12.9850 9.72976  32
  -7   0 -12 5.33614 10.4674  32
  -7   0 -11-6.15616 11.5447  32
  -7   0 -10 700.706 32.5785  32
  -7   0  -9-22.4506 14.8128  32
  -7   0  -8-2.65687 14.1540  32
  -7   0  -7-5.56719 14.5680  32
  -7   0  -6 508.180 29.5938  32
  -7   0  -5-5.89740 14.6950  32
   7   0   5 23.1523 17.4436  28
  -7   0  -4 343.155 25.1785  32
   7   0   4 349.874 28.0928  28
  -7   0  -3-1.51225 15.6629  32
   7   0   3 3.69482 17.0462  28
   7   0   2 573.531 35.2519  28
   7   0   1-6.05162 18.9876  30
   7   0   1-24.0351 17.8986  28
   7   0   0 14.1945 19.9207  30
   7   0   0 5.48414 17.2587  28
   7   0  -1-6.05959 19.7240  30
   7   0  -1 8.97103 17.4159  28
   7   0  -2 648.923 37.5596  30
   7   0  -2 504.399 32.9394  28
   7   0  -3 13.7226 19.4272  30
   7   0  -3 3.36638 16.0918  28
   7   0  -4 428.261 31.6532  30
   7   0  -4 363.367 26.5491  28
  -7   0   5-32.5772 23.0553  35
   7   0  -5 11.1011 18.0144  30
  -7   0   6 450.693 33.7554  35
   7   0  -6 405.812 29.8190  30
  -7   0   7 14.6118 21.8905  35
   7   0  -7 11.7040 17.2299  30
  -7   0   8 17.2892 21.2100  35
  -7   0   9 6.42525 18.8268  35
  -7   0  10 697.061 36.9071  35
  -7   0  11 3.92316 17.3189  35
  -7   0  12 29.5786 16.6646  35
  -7   0  13 2.83131 13.7692  35
   7  -1  12 24.9551 13.2022  33
  -7   1 -12 16.1706 10.4287  32
  -7  -1 -12 38.1346 10.3372  32
   7  -1  11-6.19271 14.5473  33
  -7   1 -11-2.95866 11.6557  32
  -7  -1 -11 28.0071 11.0784  32
   7  -1  10 198.121 20.8202  33
  -7  -1 -10 231.128 17.7603  32
  -7   1 -10 190.871 18.1520  32
  -7   1  -9 139.969 16.9361  32
  -7  -1  -9 158.836 16.8625  32
  -7   1  -8 31.6500 14.4907  32
  -7  -1  -8 26.9216 13.8555  32
  -7   1  -7 75.3005 16.0468  32
  -7  -1  -7 85.8294 16.3450  32
   7  -1   7 86.2708 18.8224  28
  -7  -1  -6 74.3088 16.8443  32
   7  -1   6 22.4949 17.1082  28
  -7  -1  -5 16.3299 15.5444  32
   7  -1   5 14.2006 16.8160  28
  -7  -1  -4 39.7482 16.5476  32
   7  -1   4 8.99784 17.3252  28
   7  -1   3 18.0758 17.1259  28
   7   1   3 17.9365 17.0477  28
   7  -1   2 151.205 21.4142  28
   7   1   2 113.438 21.4466  28
   7  -1   1-14.2068 19.9958  30
   7  -1   1 10.6759 17.3245  28
   7   1   1 27.7145 18.5203  28
   7  -1   0-18.3120 19.0230  30
   7   1   0 5.92243 18.4572  30
   7  -1   0-3.48503 16.8635  28
   7   1   0-1.84821 16.9399  28
  -7  -1   1-28.6307 21.2309  35
   7  -1  -1 8.09065 19.2157  30
   7   1  -1 17.7701 20.9320  30
   7  -1  -1-10.1734 16.3098  28
   7   1  -1-7.32833 17.0737  28
  -7  -1   2 126.352 25.1817  35
   7  -1  -2 117.593 23.4294  30
   7   1  -2 178.419 24.0781  30
   7  -1  -2 138.784 20.2170  28
   7   1  -2 133.114 21.1762  28
  -7  -1   3-24.7711 22.7445  35
   7  -1  -3 5.84534 19.6956  30
   7   1  -3 28.9435 18.2162  30
   7   1  -3 12.2368 17.0717  28
  -7  -1   4 48.1495 22.7991  35
   7  -1  -4 64.2216 20.8622  30
   7   1  -4 28.2879 20.2890  30
   7   1  -4 45.4063 18.0144  28
  -7  -1   5 24.7456 22.4927  35
   7  -1  -5-19.9423 18.6277  30
   7   1  -5 18.2917 19.3913  30
   7   1  -5-3.20101 15.3947  28
  -7  -1   5-14.8955 23.1766  39
  -7  -1   6 78.1187 22.6723  35
   7  -1  -6 46.3363 18.4632  30
   7   1  -6 15.7861 18.0164  30
   7   1  -6 36.1110 15.8374  28
  -7  -1   6 54.1093 24.0162  39
  -7  -1   7 70.9608 22.5887  35
   7   1  -7 94.6726 19.1889  30
  -7  -1   7 89.9423 24.1809  39
  -7  -1   8 14.9525 19.4928  35
  -7   1   8 40.0537 20.3619  35
  -7  -1   8 39.5217 20.9064  39
  -7  -1   9 164.940 22.1801  35
  -7   1   9 133.072 22.1981  35
  -7  -1   9 179.941 23.6054  39
  -7  -1  10 141.733 20.5364  35
  -7   1  10 149.096 21.3118  35
  -7  -1  11-2.42038 15.9233  35
  -7   1  11-1.21960 15.7819  35
  -7  -1  11-8.12669 16.1991  39
  -7  -1  12 28.5923 14.9853  35
  -7   1  12 45.7192 15.4352  35
  -7  -1  12 19.4152 14.8564  39
   7  -2  11 25.4246 12.8911  33
   7  -2  10 111.033 16.5411  33
   7  -2   9 8.06776 14.7499  33
  -7  -2  -9-5.88665 11.3792  32
  -7  -2  -8 45.1391 13.4107  32
   7  -2   8 17.1017 15.3142  28
   7  -2   7 23.9888 16.4151  33
  -7  -2  -7 4.81408 12.9280  32
   7  -2   7 27.5442 15.8986  28
   7  -2   6-4.58957 16.3006  33
  -7  -2  -6 16.8336 13.8318  32
   7  -2   6 1.60821 15.9830  28
   7  -2   5 24.5320 16.3182  33
  -7  -2  -5 21.9811 15.5150  32
   7  -2   5 44.6494 17.6845  28
   7  -2   4 910.230 43.1712  28
   7  -2   3 80.5951 18.1365  28
  -7  -2  -2 160.957 21.4004  35
   7  -2   2 149.738 20.2276  28
  -7  -2  -1 53.0375 18.9249  35
   7  -2   1 48.9130 17.2931  28
   7   2   1 36.4394 16.5906  28
  -7  -2   0-13.0562 18.0708  35
   7   2   0-5.59962 18.3351  30
   7  -2   0-3.16853 15.4706  28
   7   2   0 8.83842 16.7401  28
  -7  -2   1 52.4029 20.0596  35
   7   2  -1 60.1758 20.2199  30
   7   2  -1 72.8555 18.8804  28
  -7  -2   2 131.430 23.3818  35
   7   2  -2 117.959 22.8152  30
   7   2  -2 165.684 21.4408  28
  -7  -2   3 57.6921 21.5887  35
   7   2  -3 57.1487 20.1505  30
  -7  -2   4 898.261 45.5222  35
   7   2  -4 972.437 45.9018  30
  -7  -2   5 20.2552 19.6402  35
   7   2  -5 41.6405 19.0099  30
  -7  -2   6 12.8839 18.7983  35
   7   2  -6 4.96143 16.6717  30
  -7  -2   7-4.52475 18.7764  35
   7   2  -7 21.7308 16.8268  30
  -7  -2   7 5.44737 20.6578  39
  -7  -2   8 34.6299 18.4245  35
   7   2  -8 59.7289 16.1995  30
  -7  -2   8 38.6600 18.9171  39
  -7  -2   9-4.97899 15.8608  35
  -7  -2   9-10.6249 17.7904  39
  -7  -2  10 105.559 17.1102  35
  -7  -2  10 97.3642 18.7184  39
  -7  -2  11 19.2938 14.5720  39
   7  -3   9 65.5547 14.0889  33
   7  -3   8 23.6114 13.4916  33
   7  -3   7 491.652 27.3651  33
   7  -3   6 77.9148 16.0040  33
   7  -3   6 76.5769 16.0170  28
  -7  -3  -5 77.3738 14.3533  32
   7  -3   5 75.5350 16.1556  28
  -7  -3  -4 45.6280 14.6937  35
  -7  -3  -4 66.1794 15.0842  32
   7  -3   4 72.8508 16.8835  28
  -7  -3  -3 1342.94 53.2329  35
   7  -3   3 1421.87 55.2066  28
  -7  -3  -2-9.00154 14.7248  35
   7  -3   2 2.79024 13.9838  28
  -7  -3  -1 767.191 36.9689  35
  -7  -3   0 47.0051 16.5927  35
  -7  -3   1 667.314 34.9240  35
   7   3  -1 671.155 36.8577  30
   7   3  -1 706.390 35.5335  28
  -7  -3   2-2.80680 16.2452  35
   7   3  -2 24.9696 17.9586  30
  -7  -3   3 1330.36 54.0496  35
   7   3  -3 1344.39 56.3274  30
  -7  -3   4 118.784 19.5859  35
   7   3  -4 120.538 19.9869  30
  -7  -3   5 50.5034 16.7690  35
   7   3  -5 34.7969 17.2575  30
  -7  -3   6 104.731 17.3644  35
   7   3  -6 80.7667 17.4970  30
  -7  -3   7 447.642 25.6466  35
   7   3  -7 472.293 27.5861  30
   7   3  -8 31.2721 14.3945  30
  -7   4  -6 15.1808 9.70712  36
  -7   4  -5 60.8223 11.4958  36
  -7   4  -4 48.1336 11.0563  36
  -7   4  -3 47.9448 11.8248  36
  -7   4  -2 24.8086 11.0786  36
  -7   4  -1 46.9769 12.2339  36
  -7  -4  -1 45.1468 12.8962  35
  -7  -4   0-18.4066 12.5688  35
  -7  -4   1 52.7228 13.3493  35
  -7  -4   2 14.8362 11.7407  35
   7   4  -2 17.3133 14.1375  30
  -7  -4   3 14.0498 11.1752  35
   7   4  -3 26.8740 14.4111  30
  -7  -4   4 40.7475 11.5500  35
   7   4  -4 41.1086 14.5365  30
   7   4  -5 49.5008 13.5956  30
   7   4  -6 23.0823 12.7152  30
   7   4  -7 52.9180 12.6695  30
   8   0   9 13.4910 11.4392  33
  -8   0  -9-4.95180 8.96569  32
  -8   0  -8 6.40788 10.0271  32
  -8   0  -7 11.4799 10.5247  32
  -8   0  -6 32.2656 11.7215  32
  -8   0  -5 10.0017 11.9630  32
   8   0   5 1.22140 13.2404  28
  -8   0  -4 44.5237 13.1692  32
   8   0   4 47.0032 15.0754  28
   8   0   3 31.3448 15.0834  28
   8   0   2 731.123 35.6198  28
   8   0   1 16.8341 14.4612  28
   8   0   0 978.668 45.1185  30
   8   0   0 999.519 43.1235  28
   8   0  -1 1.56104 15.9965  30
   8   0  -1-6.77084 14.7141  28
   8   0  -2 788.646 38.9392  30
   8   0  -2 779.193 36.2784  28
   8   0  -3 22.2739 16.1345  30
   8   0  -3-12.2735 12.6446  28
   8   0  -4 48.1524 16.6994  30
   8   0  -4 71.6610 14.2260  28
   8   0  -5 17.2660 14.8840  30
   8   0  -6 25.6336 13.8762  30
  -8   0   7-31.1056 14.5528  35
   8   0  -7-2.17534 12.4087  30
  -8   0   8 24.1832 14.1308  35
  -8   0   9-7.57576 12.3804  35
   8  -1   8 232.641 17.5602  33
  -8  -1  -8 214.481 14.9370  32
   8  -1   7 26.9747 12.7033  33
  -8  -1  -7 47.6694 11.2216  32
   8  -1   6 393.590 23.5085  33
  -8  -1  -6 384.893 21.1618  32
   8  -1   6 371.909 23.1284  28
   8  -1   5 3.34474 12.3165  33
  -8  -1  -5-8.95039 11.7754  32
   8  -1   5 19.3885 13.4796  28
  -8  -1  -4 81.5244 13.6480  32
   8  -1   4 71.4260 15.4540  28
  -8  -1  -3 6.50133 12.1662  32
   8  -1   3 9.19641 14.5156  28
   8   1   3 12.6784 13.8774  28
  -8  -1  -2 22.1595 12.1859  32
   8  -1   2-1.32800 13.5375  28
   8   1   2 5.31276 13.8321  28
  -8  -1  -1-1.11647 12.2182  32
   8  -1   1-3.96024 13.9589  28
   8   1   1 6.81871 13.8987  28
  -8  -1   0 104.323 15.4855  32
   8   1   0 119.138 18.8893  30
   8  -1   0 145.696 17.3658  28
   8   1   0 101.604 16.8111  28
   8   1  -1 1.50085 15.2968  30
   8  -1  -1-4.96458 12.7190  28
   8   1  -1-9.49833 14.0918  28
   8   1  -2 13.3446 16.1111  30
   8  -1  -2-12.9034 12.9889  28
   8   1  -2 25.0273 14.6191  28
   8   1  -3-1.44060 15.4395  30
   8   1  -3 13.8220 14.5270  28
  -8  -1   4 81.0935 17.1592  35
   8   1  -4 38.5691 15.8026  30
   8   1  -4 61.1880 13.9591  28
  -8  -1   5 4.77854 15.3536  35
   8   1  -5-5.17905 14.3367  30
   8   1  -5 9.71404 12.0616  28
  -8  -1   6 377.426 23.9077  35
   8   1  -6 349.930 23.3647  30
   8   1  -6 351.143 20.6716  28
  -8  -1   7 33.8968 14.3983  35
   8   1  -7 42.4879 13.3676  30
  -8  -1   8 217.610 17.4920  35
   8  -2   7 8.19349 10.7295  33
  -8  -2  -7 6.81528 8.67084  32
  -8  -2  -6 285.963 17.9718  32
   8  -2   6 387.595 20.8780  28
  -8  -2  -5 115.285 13.3152  32
   8  -2   5 153.311 15.6823  28
  -8  -2  -4 713.157 32.7684  32
   8  -2   4 946.200 36.4153  28
  -8  -2  -3 358.458 21.1709  32
   8  -2   3 352.981 22.2996  28
  -8  -2  -2 286.947 19.4007  32
   8  -2   2 268.125 19.9741  28
  -8  -2  -1 41.6120 12.9136  32
   8  -2   1 84.4793 14.5243  28
   8   2   1 65.3488 15.2619  28
  -8  -2   0 26.5008 13.5594  35
   8  -2   0 25.7223 12.5537  28
   8   2   0 16.8622 13.3846  28
  -8  -2   1 47.6266 14.6388  35
   8   2  -1 44.7596 15.6182  30
   8   2  -1 48.5604 14.3838  28
  -8  -2   2 300.511 21.0317  35
   8   2  -2 233.399 21.8729  30
   8   2  -2 259.662 20.3379  28
  -8  -2   3 290.957 21.6263  35
   8   2  -3 339.746 23.5207  30
   8   2  -3 341.087 22.1671  28
  -8  -2   4 902.777 38.3025  35
   8   2  -4 913.836 39.7224  30
   8   2  -4 930.355 38.4966  28
  -8  -2   5 154.057 16.8085  35
   8   2  -5 143.283 16.8513  30
   8   2  -5 152.263 15.6393  28
  -8  -2   6 392.839 21.5752  35
   8   2  -6 351.934 19.9605  28
  -8  -2   7 15.8230 11.4053  35
   8   2  -7 3.61023 11.4816  30
   8   2  -7 5.29830 9.00111  28
  -8  -3  -3 9.81918 8.67132  32
  -8  -3  -2 345.927 18.6381  32
  -8  -3  -1 164.936 14.1452  35
  -8  -3  -1 120.887 12.8773  32
  -8  -3   0 223.478 15.2522  35
  -8  -3   0 135.401 13.7312  32
  -8  -3   1 153.996 14.5025  35
   8   3  -1 160.076 14.3906  28
  -8  -3   2 463.747 22.7544  35
   8   3  -2 468.161 24.6355  30
   8   3  -2 454.869 23.5816  28
  -8  -3   3 29.5614 10.7331  35
   8   3  -3 6.69959 11.4773  30
   8   3  -3 7.74908 10.0585  28
  -8  -3   4 118.212 12.0729  35
   8   3  -4 126.864 14.0765  30
   8   3  -4 129.733 13.0073  28
   0   0   0    0.00    0.00   0
;
_shelx_hkl_checksum                64298
_olex2_submission_special_instructions  'No special instructions were received'
_oxdiff_exptl_absorpt_empirical_details
;
Empirical correction (ABSPACK) includes:
- Absorption correction using spherical harmonics
- Frame scaling
;
_oxdiff_exptl_absorpt_empirical_full_max  1.607
_oxdiff_exptl_absorpt_empirical_full_min  0.775
loop_
  _twin_individual_id
  _twin_individual_mass_fraction_refined
 1 0.447(6)
 2 0.553(6)
