# Supplementary material
Source: MDPI journal article supplement (https://www.mdpi.com/2075-163X/9/6/373)
Supplement: s1 [file s1 › UAD_-173_last.cif]

data_UAD_-173_uracdih_100k
_audit_creation_date               2019-04-29
_audit_creation_method
;
Olex2 1.2
(compiled 2018.05.29 svn.r3508 for OlexSys, GUI svn.r5506)
;
_shelx_SHELXL_version_number       '2018/3'
_audit_contact_author_address      ?
_audit_contact_author_email        ?
_audit_contact_author_name         ''
_audit_contact_author_phone        ?
_publ_contact_author_id_orcid      ?
_publ_section_references
;
Dolomanov, O.V., Bourhis, L.J., Gildea, R.J, Howard, J.A.K. & Puschmann, H.
 (2009), J. Appl. Cryst. 42, 339-341.

Sheldrick, G.M. (2015). Acta Cryst. C71, 3-8.
;
_chemical_name_common              ?
_chemical_name_systematic          ?
_chemical_formula_moiety           'C5 H4 N4 O3, 2(H2 O)'
_chemical_formula_sum              'C5 H8 N4 O5'
_chemical_formula_weight           204.15
_chemical_melting_point            ?

loop_
  _atom_type_symbol
  _atom_type_description
  _atom_type_scat_dispersion_real
  _atom_type_scat_dispersion_imag
  _atom_type_scat_source
 'C' 'C' 0.0181 0.0091 'International Tables Vol C Tables 4.2.6.8 and 6.1.1.4'
 'H' 'H' 0.0000 0.0000 'International Tables Vol C Tables 4.2.6.8 and 6.1.1.4'
 'N' 'N' 0.0311 0.0180 'International Tables Vol C Tables 4.2.6.8 and 6.1.1.4'
 'O' 'O' 0.0492 0.0322 'International Tables Vol C Tables 4.2.6.8 and 6.1.1.4'

_shelx_space_group_comment
;
The symmetry employed for this shelxl refinement is uniquely defined
by the following loop, which should always be used as a source of
symmetry information in preference to the above space-group names.
They are only intended as comments.
;
_space_group_crystal_system        'monoclinic'
_space_group_IT_number             14
_space_group_name_H-M_alt          'P 1 21/c 1'
_space_group_name_Hall             '-P 2ybc'
loop_
  _space_group_symop_operation_xyz
 'x, y, z'
 '-x, y+1/2, -z+1/2'
 '-x, -y, -z'
 'x, -y-1/2, z-1/2'

_cell_length_a                     7.2559(4)
_cell_length_b                     6.3669(4)
_cell_length_c                     17.4739(13)
_cell_angle_alpha                  90
_cell_angle_beta                   90.036(6)
_cell_angle_gamma                  90
_cell_volume                       807.25(9)
_cell_formula_units_Z              4
_cell_measurement_reflns_used      1283
_cell_measurement_temperature      100(2)
_cell_measurement_theta_max        69.3390
_cell_measurement_theta_min        5.0480
_shelx_estimated_absorpt_T_max     ?
_shelx_estimated_absorpt_T_min     ?
_exptl_absorpt_coefficient_mu      1.321
_exptl_absorpt_correction_T_max    1.00000
_exptl_absorpt_correction_T_min    0.72883
_exptl_absorpt_correction_type     multi-scan
_exptl_absorpt_process_details
;
CrysAlisPro 1.171.39.44a (Rigaku Oxford Diffraction, 2018)
Empirical absorption correction using spherical harmonics,
 implemented in SCALE3 ABSPACK scaling algorithm.
;
_exptl_absorpt_special_details     ?
_exptl_crystal_colour              'translucent colorless'
_exptl_crystal_density_diffrn      1.680
_exptl_crystal_density_meas        ?
_exptl_crystal_density_method      ?
_exptl_crystal_description         'prism'
_exptl_crystal_F_000               424
_exptl_crystal_size_max            0.077
_exptl_crystal_size_mid            0.058
_exptl_crystal_size_min            0.022
_exptl_transmission_factor_max     ?
_exptl_transmission_factor_min     ?
_diffrn_reflns_av_R_equivalents    0.0226
_diffrn_reflns_av_unetI/netI       0.0324
_diffrn_reflns_Laue_measured_fraction_full  0.995
_diffrn_reflns_Laue_measured_fraction_max  0.992
_diffrn_reflns_limit_h_max         8
_diffrn_reflns_limit_h_min         -8
_diffrn_reflns_limit_k_max         7
_diffrn_reflns_limit_k_min         -6
_diffrn_reflns_limit_l_max         21
_diffrn_reflns_limit_l_min         -20
_diffrn_reflns_number              4141
_diffrn_reflns_point_group_measured_fraction_full  0.995
_diffrn_reflns_point_group_measured_fraction_max  0.992
_diffrn_reflns_theta_full          67.684
_diffrn_reflns_theta_max           69.983
_diffrn_reflns_theta_min           2.529
_diffrn_ambient_environment        N~2~
_diffrn_ambient_temperature        100(2)
_diffrn_detector                   'CCD plate'
_diffrn_detector_area_resol_mean   ?
_diffrn_detector_type              HyPix3000
_diffrn_measured_fraction_theta_full  0.995
_diffrn_measured_fraction_theta_max  0.992
_diffrn_measurement_details
;
List of Runs (angles in degrees, time in seconds):

  # Type    Start    End  Width  t~exp~   \w     \q     \k     \f   Frames
--------------------------------------------------------------------------
  1  \w    -69.00 -22.00   0.50    3.00    --  -38.82 122.00  29.00   94
  2  \w    -94.00 -60.00   0.50    3.00    --  -38.82 151.00-169.00   68
  3  \w   -100.00 -71.00   0.50    3.00    --  -38.82-151.00 146.00   58
  4  \w     20.00  45.00   0.50    3.00    --   38.82-122.00 -52.00   50
  5  \w     64.00  90.00   0.50    3.00    --   38.82 151.00-169.00   52
  6  \w     37.00  62.00   0.50    3.00    --   38.82-151.00 146.00   50
  7  \w     91.00 124.00   0.50    6.00    --  100.00 151.00-169.00   66
  8  \w     68.00 108.00   0.50    6.00    --  100.00-122.00 -52.00   80
  9  \w    -55.00 -29.00   0.50    3.00    --  -38.82  54.00 -60.00   52
 10  \w    -15.00  11.00   0.50    3.00    --  -38.82 104.00 150.00   52
 11  \w    -73.00 -31.00   0.50    3.00    --  -38.82 104.00 150.00   84
 12  \w     -5.00  26.00   0.50    3.00    --  -38.82  54.00 -60.00   62
 13  \w     78.00 104.00   0.50    3.00    --   38.82  32.00  30.00   52
 14  \w    -24.00   5.00   0.50    3.00    --   38.82 -43.00 -60.00   58
 15  \w     20.00  45.00   0.50    3.00    --   38.82 -32.00  30.00   50
 16  \w     43.00  68.00   0.50    3.00    --   38.82-104.00 -30.00   50
 17  \w     24.00  81.00   0.50    3.00    --   38.82  54.00-120.00  114
 18  \w    -27.00  10.00   0.50    3.00    --   38.82 -32.00  30.00   74
 19  \w    -14.00  32.00   0.50    3.00    --   38.82-104.00 -30.00   92
 20  \w     37.00  74.00   0.50    3.00    --   38.82  32.00  30.00   74
 21  \w     21.00  50.00   0.50    3.00    --   38.82 -43.00 -60.00   58
 22  \w     24.00  51.00   0.50    6.00    --  100.00   0.00-180.00   54
 23  \w     96.00 125.00   0.50    6.00    --  100.00 -69.00-120.00   58
 24  \w    116.00 141.00   0.50    6.00    --  100.00  30.00 -90.00   50
 25  \w     89.00 156.00   0.50    6.00    --  100.00 133.00-180.00  134
 26  \w     34.00  80.00   0.50    6.00    --  100.00 -69.00-120.00   92
 27  \w    109.00 135.00   0.50    6.00    --  100.00 111.00-120.00   52
 28  \w     71.00 132.00   0.50    6.00    --  100.00  15.00-150.00  122
 29  \w     84.00 152.00   0.50    6.00    --  100.00  61.00-120.00  136
 30  \w     93.00 143.00   0.50    6.00    --  100.00  37.00 150.00  100
 31  \w     56.00 103.00   0.50    6.00    --  100.00 -61.00-180.00   94
 32  \w     36.00  90.00   0.50    6.00    --  100.00 -37.00 120.00  108
 33  \w     98.00 123.00   0.50    6.00    --  100.00  45.00-150.00   50
 34  \w     31.00 109.00   0.50    6.00    --  100.00 -86.00 120.00  156
 35  \w     71.00 128.00   0.50    6.00    --  100.00 133.00 -90.00  114
 36  \w     88.00 157.00   0.50    6.00    --  100.00  93.00   0.00  138
 37  \w     81.00 107.00   0.50    6.00    --  100.00 111.00-120.00   52
 38  \w     78.00 103.00   0.50    6.00    --  100.00   0.00-180.00   50
 39  \w     77.00 124.00   0.50    6.00    --  100.00  69.00 -60.00   94
;
_diffrn_measurement_device         'four-circle diffractometer'
_diffrn_measurement_device_type   
 'SuperNova, Single source at offset/far, HyPix3000'
_diffrn_measurement_method         '\w scans'
_diffrn_orient_matrix_type        
 'CrysAlisPro convention (1999,Acta A55,543-557)'
_diffrn_orient_matrix_UB_11        0.2071387000
_diffrn_orient_matrix_UB_12        0.0517865000
_diffrn_orient_matrix_UB_13        -0.0041288000
_diffrn_orient_matrix_UB_21        -0.0398356000
_diffrn_orient_matrix_UB_22        0.1707281000
_diffrn_orient_matrix_UB_23        -0.0602303000
_diffrn_orient_matrix_UB_31        -0.0239603000
_diffrn_orient_matrix_UB_32        0.1634746000
_diffrn_orient_matrix_UB_33        0.0642587000
_diffrn_radiation_monochromator    mirror
_diffrn_radiation_probe            x-ray
_diffrn_radiation_type             CuK\a
_diffrn_radiation_wavelength       1.54184
_diffrn_source                     'micro-focus sealed X-ray tube'
_diffrn_source_type                'SuperNova (Cu) X-ray Source'
_reflns_Friedel_coverage           0.000
_reflns_Friedel_fraction_full      .
_reflns_Friedel_fraction_max       .
_reflns_number_gt                  1265
_reflns_number_total               1518
_reflns_odcompleteness_completeness  98.59
_reflns_odcompleteness_iscentric   1
_reflns_odcompleteness_theta       70.93
_reflns_special_details
;
 Reflections were merged by SHELXL according to the crystal
 class for the calculation of statistics and refinement.
 
 _reflns_Friedel_fraction is defined as the number of unique
 Friedel pairs measured divided by the number that would be
 possible theoretically, ignoring centric projections and
 systematic absences. Completness statistics refer to single and
 composite reflections containing twin component 1 only.
;
_reflns_threshold_expression       'I > 2\s(I)'
_computing_cell_refinement         'CrysAlisPro 1.171.39.44a (Rigaku OD, 2018)'
_computing_data_collection         'CrysAlisPro 1.171.39.44a (Rigaku OD, 2018)'
_computing_data_reduction          'CrysAlisPro 1.171.39.44a (Rigaku OD, 2018)'
_computing_molecular_graphics      'Olex2 (Dolomanov et al., 2009)'
_computing_publication_material    'Olex2 (Dolomanov et al., 2009)'
_computing_structure_refinement    'ShelXL (Sheldrick, 2015)'
_computing_structure_solution      'SHELXT (Sheldrick, 2018)'
_refine_diff_density_max           0.286
_refine_diff_density_min           -0.200
_refine_diff_density_rms           0.063
_refine_ls_extinction_coef         0.0020(3)
_refine_ls_extinction_expression  
 'Fc^*^=kFc[1+0.001xFc^2^\l^3^/sin(2\q)]^-1/4^'
_refine_ls_extinction_method       'SHELXL-2018/3 (Sheldrick 2018)'
_refine_ls_goodness_of_fit_ref     1.059
_refine_ls_hydrogen_treatment      mixed
_refine_ls_matrix_type             full
_refine_ls_number_parameters       166
_refine_ls_number_reflns           1518
_refine_ls_number_restraints       0
_refine_ls_R_factor_all            0.0570
_refine_ls_R_factor_gt             0.0475
_refine_ls_restrained_S_all        1.059
_refine_ls_shift/su_max            0.000
_refine_ls_shift/su_mean           0.000
_refine_ls_structure_factor_coef   Fsqd
_refine_ls_weighting_details      
 'w=1/[\s^2^(Fo^2^)+(0.0837P)^2^+0.0333P] where P=(Fo^2^+2Fc^2^)/3'
_refine_ls_weighting_scheme        calc
_refine_ls_wR_factor_gt            0.1230
_refine_ls_wR_factor_ref           0.1304
_refine_special_details
;
 Refined as a 2-component twin.
;
_olex2_refinement_description
;
1. Twinned data refinement
 Scales: 0.457(5)
 0.543(5)
2. Fixed Uiso
 At 1.2 times of:
  All N(H) groups
 At 1.5 times of:
  All O(H,H) groups
3. Uiso/Uaniso restraints and constraints
Uanis(C1A) = Uanis(C1B)
Uanis(C2A) = Uanis(C2B) = Uanis(C3A) = Uanis(C3B)
Uanis(C4A) = Uanis(C4B)
Uanis(C5A) = Uanis(C5B)
Uanis(N1A) = Uanis(N1B) = Uanis(N3A) = Uanis(N3B)
Uanis(N2A) = Uanis(N2B)
Uanis(N4A) = Uanis(N4B)
Uanis(O1A) = Uanis(O1B)
Uanis(O2A) = Uanis(O2B)
Uanis(O3A) = Uanis(O3B)
4. Others
 Sof(C1B)=Sof(C2B)=Sof(C3B)=Sof(C4B)=Sof(C5B)=Sof(N1B)=Sof(H1B)=Sof(N2B)=
 Sof(H2B)=Sof(N3B)=Sof(H3B)=Sof(N4B)=Sof(H4B)=Sof(O1B)=Sof(O2B)=Sof(O3B)=1-
 FVAR(1)
 Sof(C1A)=Sof(C2A)=Sof(C3A)=Sof(C4A)=Sof(C5A)=Sof(N1A)=Sof(H1A)=Sof(N2A)=
 Sof(H2A)=Sof(N3A)=Sof(H3A)=Sof(N4A)=Sof(H4A)=Sof(O1A)=Sof(O2A)=Sof(O3A)=FVAR(1)
5.a Aromatic/amide H refined with riding coordinates:
 N1A(H1A), N2A(H2A), N3A(H3A), N4A(H4A), N1B(H1B), N2B(H2B), N3B(H3B), N4B(H4B)
;
_atom_sites_solution_hydrogens     mixed
_atom_sites_solution_primary       ?
_atom_sites_solution_secondary     ?
loop_
  _atom_site_label
  _atom_site_type_symbol
  _atom_site_fract_x
  _atom_site_fract_y
  _atom_site_fract_z
  _atom_site_U_iso_or_equiv
  _atom_site_adp_type
  _atom_site_occupancy
  _atom_site_site_symmetry_order
  _atom_site_calc_flag
  _atom_site_refinement_flags_posn
  _atom_site_refinement_flags_adp
  _atom_site_refinement_flags_occupancy
  _atom_site_disorder_assembly
  _atom_site_disorder_group
 C1A C 0.1093(11) 0.2106(15) -0.4260(6) 0.0257(11) Uani 0.588(3) 1 d . . P A 1
 C2A C 0.2652(7) 0.5305(7) -0.3996(6) 0.0243(4) Uani 0.588(3) 1 d . . P A 1
 C3A C 0.2860(7) 0.5708(7) -0.4760(3) 0.0243(4) Uani 0.588(3) 1 d . . P A 1
 C4A C 0.2220(8) 0.4306(7) -0.5333(3) 0.0246(5) Uani 0.588(3) 1 d . . P A 1
 C5A C 0.4071(11) 0.8353(15) -0.4106(6) 0.0265(11) Uani 0.588(3) 1 d . . P A 1
 N1A N 0.1385(12) 0.2507(11) -0.5017(3) 0.0247(11) Uani 0.588(3) 1 d . . P A 1
 H1A H 0.102087 0.156323 -0.533510 0.030 Uiso 0.588(3) 1 calc R . P A 1
 N2A N 0.1777(11) 0.3525(12) -0.3757(4) 0.0297(9) Uani 0.588(3) 1 d . . P A 1
 H2A H 0.165509 0.329871 -0.327406 0.036 Uiso 0.588(3) 1 calc R . P A 1
 N3A N 0.3742(12) 0.7638(12) -0.4825(5) 0.0247(11) Uani 0.588(3) 1 d . . P A 1
 H3A H 0.402701 0.826507 -0.524441 0.030 Uiso 0.588(3) 1 calc R . P A 1
 N4A N 0.3365(11) 0.6864(12) -0.3592(5) 0.0257(9) Uani 0.588(3) 1 d . . P A 1
 H4A H 0.339188 0.694997 -0.310100 0.031 Uiso 0.588(3) 1 calc R . P A 1
 O1A O 0.0315(10) 0.0504(10) -0.4021(5) 0.0324(13) Uani 0.588(3) 1 d . . P A 1
 O2A O 0.2335(6) 0.4492(7) -0.6030(3) 0.0298(6) Uani 0.588(3) 1 d . . P A 1
 O3A O 0.4898(9) 0.9986(11) -0.3924(4) 0.0344(11) Uani 0.588(3) 1 d . . P A 1
 C1B C 0.3886(17) 0.794(2) -0.4275(9) 0.0257(11) Uani 0.412(3) 1 d . . P A 2
 C2B C 0.2385(12) 0.4810(13) -0.4024(8) 0.0243(4) Uani 0.412(3) 1 d . . P A 2
 C3B C 0.2184(10) 0.4323(10) -0.4776(5) 0.0243(4) Uani 0.412(3) 1 d . . P A 2
 C4B C 0.2797(11) 0.5681(10) -0.5335(4) 0.0246(5) Uani 0.412(3) 1 d . . P A 2
 C5B C 0.0904(18) 0.172(2) -0.4083(9) 0.0265(11) Uani 0.412(3) 1 d . . P A 2
 N1B N 0.361(2) 0.7450(18) -0.5015(7) 0.0247(11) Uani 0.412(3) 1 d . . P A 2
 H1B H 0.399236 0.836975 -0.533860 0.030 Uiso 0.412(3) 1 calc R . P A 2
 N2B N 0.3204(19) 0.6531(19) -0.3733(8) 0.0297(9) Uani 0.412(3) 1 d . . P A 2
 H2B H 0.329884 0.674721 -0.324891 0.036 Uiso 0.412(3) 1 calc R . P A 2
 N3B N 0.1253(16) 0.2392(15) -0.4797(6) 0.0247(11) Uani 0.412(3) 1 d . . P A 2
 H3B H 0.095043 0.173297 -0.520797 0.030 Uiso 0.412(3) 1 calc R . P A 2
 N4B N 0.1603(16) 0.3227(17) -0.3589(7) 0.0257(9) Uani 0.412(3) 1 d . . P A 2
 H4B H 0.155902 0.318495 -0.309707 0.031 Uiso 0.412(3) 1 calc R . P A 2
 O1B O 0.4683(14) 0.9567(19) -0.4064(6) 0.0324(13) Uani 0.412(3) 1 d . . P A 2
 O2B O 0.2684(9) 0.5442(9) -0.6046(4) 0.0298(6) Uani 0.412(3) 1 d . . P A 2
 O3B O 0.0035(16) 0.0047(18) -0.3952(8) 0.0344(11) Uani 0.412(3) 1 d . . P A 2
 OW1 O -0.0887(5) -0.2279(5) -0.27940(19) 0.0632(9) Uani 1 1 d . . . . .
 HW1A H -0.051(8) -0.139(8) -0.313(3) 0.095 Uiso 1 1 d R . . . .
 HW1B H -0.160(9) -0.307(7) -0.309(3) 0.095 Uiso 1 1 d R . . . .
 OW2 O 0.4062(5) 0.7507(5) -0.21714(18) 0.0663(10) Uani 1 1 d . . . . .
 HW2A H 0.330(9) 0.798(7) -0.172(3) 0.099 Uiso 1 1 d R . . . .
 HW2B H 0.450(9) 0.644(8) -0.196(3) 0.099 Uiso 1 1 d R . . . .

loop_
  _atom_site_aniso_label
  _atom_site_aniso_U_11
  _atom_site_aniso_U_22
  _atom_site_aniso_U_33
  _atom_site_aniso_U_23
  _atom_site_aniso_U_13
  _atom_site_aniso_U_12
 C1A 0.0262(18) 0.022(3) 0.029(5) 0.006(2) 0.003(3) -0.0003(17)
 C2A 0.0223(10) 0.0193(11) 0.0312(9) -0.0038(19) -0.0013(17) 0.0000(7)
 C3A 0.0223(10) 0.0193(11) 0.0312(9) -0.0038(19) -0.0013(17) 0.0000(7)
 C4A 0.0235(11) 0.0188(11) 0.0316(12) 0.000(2) 0.002(2) 0.0013(9)
 C5A 0.030(2) 0.027(4) 0.022(4) -0.003(2) 0.002(3) 0.003(2)
 N1A 0.0288(7) 0.0194(8) 0.026(4) -0.0028(16) 0.001(2) -0.0029(6)
 N2A 0.0376(18) 0.031(2) 0.020(3) 0.0030(19) 0.003(2) -0.0007(17)
 N3A 0.0288(7) 0.0194(8) 0.026(4) -0.0028(16) 0.001(2) -0.0029(6)
 N4A 0.0298(16) 0.023(2) 0.025(3) -0.0017(18) 0.003(3) -0.0015(13)
 O1A 0.0322(18) 0.028(3) 0.0367(19) -0.007(3) -0.005(2) -0.009(2)
 O2A 0.0370(12) 0.0258(16) 0.0267(8) 0.006(2) 0.0020(19) -0.0043(13)
 O3A 0.039(2) 0.025(3) 0.040(2) -0.0054(16) -0.003(2) -0.0108(19)
 C1B 0.0262(18) 0.022(3) 0.029(5) 0.006(2) 0.003(3) -0.0003(17)
 C2B 0.0223(10) 0.0193(11) 0.0312(9) -0.0038(19) -0.0013(17) 0.0000(7)
 C3B 0.0223(10) 0.0193(11) 0.0312(9) -0.0038(19) -0.0013(17) 0.0000(7)
 C4B 0.0235(11) 0.0188(11) 0.0316(12) 0.000(2) 0.002(2) 0.0013(9)
 C5B 0.030(2) 0.027(4) 0.022(4) -0.003(2) 0.002(3) 0.003(2)
 N1B 0.0288(7) 0.0194(8) 0.026(4) -0.0028(16) 0.001(2) -0.0029(6)
 N2B 0.0376(18) 0.031(2) 0.020(3) 0.0030(19) 0.003(2) -0.0007(17)
 N3B 0.0288(7) 0.0194(8) 0.026(4) -0.0028(16) 0.001(2) -0.0029(6)
 N4B 0.0298(16) 0.023(2) 0.025(3) -0.0017(18) 0.003(3) -0.0015(13)
 O1B 0.0322(18) 0.028(3) 0.0367(19) -0.007(3) -0.005(2) -0.009(2)
 O2B 0.0370(12) 0.0258(16) 0.0267(8) 0.006(2) 0.0020(19) -0.0043(13)
 O3B 0.039(2) 0.025(3) 0.040(2) -0.0054(16) -0.003(2) -0.0108(19)
 OW1 0.064(2) 0.0773(19) 0.0485(17) 0.0028(13) 0.0067(17) -0.0021(15)
 OW2 0.073(3) 0.0779(19) 0.0474(17) 0.0119(13) -0.0020(18) -0.0002(17)

_geom_special_details
;
 All esds (except the esd in the dihedral angle between two l.s. planes)
 are estimated using the full covariance matrix.  The cell esds are taken
 into account individually in the estimation of esds in distances, angles
 and torsion angles; correlations between esds in cell parameters are only
 used when they are defined by crystal symmetry.  An approximate (isotropic)
 treatment of cell esds is used for estimating esds involving l.s. planes.
;
loop_
  _geom_bond_atom_site_label_1
  _geom_bond_atom_site_label_2
  _geom_bond_distance
  _geom_bond_site_symmetry_2
  _geom_bond_publ_flag
 C1A N1A 1.364(8) . ?
 C1A N2A 1.356(17) . ?
 C1A O1A 1.239(9) . ?
 C2A C3A 1.369(12) . ?
 C2A N2A 1.365(8) . ?
 C2A N4A 1.323(8) . ?
 C3A C4A 1.419(7) . ?
 C3A N3A 1.390(9) . ?
 C4A N1A 1.408(8) . ?
 C4A O2A 1.226(7) . ?
 C5A N3A 1.358(9) . ?
 C5A N4A 1.402(18) . ?
 C5A O3A 1.242(10) . ?
 C1B N1B 1.346(14) . ?
 C1B N2B 1.39(3) . ?
 C1B O1B 1.244(14) . ?
 C2B C3B 1.358(17) . ?
 C2B N2B 1.346(13) . ?
 C2B N4B 1.385(13) . ?
 C3B C4B 1.378(10) . ?
 C3B N3B 1.403(12) . ?
 C4B N1B 1.388(12) . ?
 C4B O2B 1.256(11) . ?
 C5B N3B 1.343(13) . ?
 C5B N4B 1.39(3) . ?
 C5B O3B 1.260(14) . ?

loop_
  _geom_angle_atom_site_label_1
  _geom_angle_atom_site_label_2
  _geom_angle_atom_site_label_3
  _geom_angle
  _geom_angle_site_symmetry_1
  _geom_angle_site_symmetry_3
  _geom_angle_publ_flag
 N2A C1A N1A 116.6(7) . . ?
 O1A C1A N1A 123.6(10) . . ?
 O1A C1A N2A 119.8(8) . . ?
 N2A C2A C3A 120.4(7) . . ?
 N4A C2A C3A 109.6(6) . . ?
 N4A C2A N2A 129.9(9) . . ?
 C2A C3A C4A 122.3(5) . . ?
 C2A C3A N3A 107.2(6) . . ?
 N3A C3A C4A 130.5(6) . . ?
 N1A C4A C3A 112.0(5) . . ?
 O2A C4A C3A 128.1(5) . . ?
 O2A C4A N1A 119.8(6) . . ?
 N3A C5A N4A 107.6(7) . . ?
 O3A C5A N3A 127.0(11) . . ?
 O3A C5A N4A 125.4(8) . . ?
 C1A N1A C4A 126.9(7) . . ?
 C1A N2A C2A 121.7(7) . . ?
 C5A N3A C3A 107.6(8) . . ?
 C2A N4A C5A 108.0(7) . . ?
 N1B C1B N2B 116.9(11) . . ?
 O1B C1B N1B 123.1(16) . . ?
 O1B C1B N2B 120.0(12) . . ?
 C3B C2B N4B 108.8(9) . . ?
 N2B C2B C3B 126.8(12) . . ?
 N2B C2B N4B 124.4(12) . . ?
 C2B C3B C4B 120.5(7) . . ?
 C2B C3B N3B 106.1(8) . . ?
 C4B C3B N3B 133.4(8) . . ?
 C3B C4B N1B 111.2(8) . . ?
 O2B C4B C3B 127.2(7) . . ?
 O2B C4B N1B 121.6(9) . . ?
 N3B C5B N4B 106.9(11) . . ?
 O3B C5B N3B 122.2(17) . . ?
 O3B C5B N4B 130.8(14) . . ?
 C1B N1B C4B 129.5(13) . . ?
 C2B N2B C1B 115.0(11) . . ?
 C5B N3B C3B 110.2(10) . . ?
 C2B N4B C5B 108.1(10) . . ?

loop_
  _geom_hbond_atom_site_label_D
  _geom_hbond_atom_site_label_H
  _geom_hbond_atom_site_label_A
  _geom_hbond_distance_DH
  _geom_hbond_distance_HA
  _geom_hbond_distance_DA
  _geom_hbond_angle_DHA
  _geom_hbond_site_symmetry_A
  _geom_hbond_publ_flag
 N1A H1A O1A 0.86 1.98 2.832(12) 168.5 3_554 yes
 N2A H2A OW1 0.86 1.98 2.832(7) 169.5 2_554 yes
 N3A H3A O3A 0.86 1.99 2.836(14) 167.6 3_674 yes
 N4A H4A OW2 0.86 1.73 2.566(8) 162.7 . yes
 N1B H1B O1B 0.86 1.93 2.78(2) 168.0 3_674 yes
 N2B H2B OW2 0.86 2.02 2.867(12) 167.6 . yes
 N3B H3B O3B 0.86 1.99 2.84(2) 170.6 3_554 yes
 N4B H4B OW1 0.86 1.66 2.493(10) 162.6 2_554 yes
 OW1 HW1A O1A 0.86(6) 2.06(6) 2.916(6) 174(5) . yes
 OW1 HW1A O3B 0.86(6) 1.74(6) 2.596(10) 168(5) . yes
 OW1 HW1B O2A 0.88(6) 1.87(6) 2.704(5) 157(5) 3_554 yes
 OW1 HW1B O2B 0.88(6) 2.28(5) 3.140(8) 165(5) 3_554 yes
 OW2 HW2A O2A 1.01(6) 2.13(5) 3.034(6) 148(4) 4_576 yes
 OW2 HW2A O2B 1.01(6) 1.61(6) 2.563(7) 156(5) 4_576 yes
 OW2 HW2B O3A 0.84(6) 1.85(6) 2.609(6) 150(5) 2_644 yes
 OW2 HW2B O1B 0.84(6) 2.23(6) 2.998(9) 153(5) 2_644 yes

loop_
  _geom_torsion_atom_site_label_1
  _geom_torsion_atom_site_label_2
  _geom_torsion_atom_site_label_3
  _geom_torsion_atom_site_label_4
  _geom_torsion
  _geom_torsion_site_symmetry_1
  _geom_torsion_site_symmetry_2
  _geom_torsion_site_symmetry_3
  _geom_torsion_site_symmetry_4
  _geom_torsion_publ_flag
 C2A C3A C4A N1A -0.4(8) . . . . ?
 C2A C3A C4A O2A -179.6(5) . . . . ?
 C2A C3A N3A C5A 0.8(8) . . . . ?
 C3A C2A N2A C1A 0.2(9) . . . . ?
 C3A C2A N4A C5A 0.0(8) . . . . ?
 C3A C4A N1A C1A 3.2(11) . . . . ?
 C4A C3A N3A C5A -179.9(6) . . . . ?
 N1A C1A N2A C2A 2.3(11) . . . . ?
 N2A C1A N1A C4A -4.3(12) . . . . ?
 N2A C2A C3A C4A -1.2(8) . . . . ?
 N2A C2A C3A N3A 178.2(7) . . . . ?
 N2A C2A N4A C5A -178.5(7) . . . . ?
 N3A C3A C4A N1A -179.6(5) . . . . ?
 N3A C3A C4A O2A 1.1(11) . . . . ?
 N3A C5A N4A C2A 0.5(9) . . . . ?
 N4A C2A C3A C4A -179.9(5) . . . . ?
 N4A C2A C3A N3A -0.5(7) . . . . ?
 N4A C2A N2A C1A 178.5(8) . . . . ?
 N4A C5A N3A C3A -0.7(9) . . . . ?
 O1A C1A N1A C4A 178.5(7) . . . . ?
 O1A C1A N2A C2A 179.6(7) . . . . ?
 O2A C4A N1A C1A -177.4(7) . . . . ?
 O3A C5A N3A C3A 177.0(7) . . . . ?
 O3A C5A N4A C2A -177.3(7) . . . . ?
 C2B C3B C4B N1B 1.0(12) . . . . ?
 C2B C3B C4B O2B -179.2(8) . . . . ?
 C2B C3B N3B C5B -0.2(12) . . . . ?
 C3B C2B N2B C1B 0.7(17) . . . . ?
 C3B C2B N4B C5B 0.1(11) . . . . ?
 C3B C4B N1B C1B 1.6(19) . . . . ?
 C4B C3B N3B C5B -177.7(8) . . . . ?
 N1B C1B N2B C2B 1.7(17) . . . . ?
 N2B C1B N1B C4B -3(2) . . . . ?
 N2B C2B C3B C4B -2.2(15) . . . . ?
 N2B C2B C3B N3B 179.9(11) . . . . ?
 N2B C2B N4B C5B -179.8(11) . . . . ?
 N3B C3B C4B N1B 178.2(7) . . . . ?
 N3B C3B C4B O2B -2.0(16) . . . . ?
 N3B C5B N4B C2B -0.2(12) . . . . ?
 N4B C2B C3B C4B 178.0(7) . . . . ?
 N4B C2B C3B N3B 0.1(11) . . . . ?
 N4B C2B N2B C1B -179.5(10) . . . . ?
 N4B C5B N3B C3B 0.2(13) . . . . ?
 O1B C1B N1B C4B 178.0(12) . . . . ?
 O1B C1B N2B C2B -179.3(11) . . . . ?
 O2B C4B N1B C1B -178.2(12) . . . . ?
 O3B C5B N3B C3B 178.1(10) . . . . ?
 O3B C5B N4B C2B -177.8(11) . . . . ?


_shelx_res_file
;
TITL uracdih_100k_a.res in P2(1)/c
    uracdih_100k.res
    created by SHELXL-2018/3 at 23:31:20 on 29-Apr-2019
REM Old TITL UrAcDih_100K in P2(1)/c
REM SHELXT solution in P2(1)/c: R1 0.242, Rweak 0.066, Alpha 0.059
REM <I/s> 0.793 for 154 systematic absences, Orientation as input
REM Formula found by SHELXT: C8 N6 O2
CELL 1.54184 7.2559 6.3669 17.4739 90 90.036 90
ZERR 4 0.0004 0.0004 0.0013 0 0.006 0
LATT 1
SYMM -X,0.5+Y,0.5-Z
SFAC C H N O
UNIT 20 32 16 20
EADP C1A C1B
EADP C2A C2B C3A C3B
EADP C4A C4B
EADP C5A C5B
EADP N1A N1B N3A N3B
EADP N2A N2B
EADP N4A N4B
EADP O1A O1B
EADP O2A O2B
EADP O3A O3B

L.S. 20
PLAN  20
BOND
list 4
fmap 2 53
acta
TWIN -1 0 0 0 -1 0 0 0 1 2
OMIT -4 140
OMIT 0 2 5
OMIT -6 1 14
OMIT 1 1 0
OMIT -6 1 13
REM <olex2.extras>
REM <HklSrc "%.\\UrAcDih_100K.hkl">
REM </olex2.extras>

WGHT    0.083700    0.033300
EXTI    0.001981
BASF   0.54310
FVAR       0.63486   0.58819
PART 1
C1A   1    0.109334    0.210557   -0.426044    21.00000    0.02619    0.02222 =
         0.02882    0.00631    0.00273   -0.00034
C2A   1    0.265218    0.530497   -0.399558    21.00000    0.02229    0.01925 =
         0.03123   -0.00378   -0.00133    0.00004
C3A   1    0.286042    0.570758   -0.476017    21.00000    0.02229    0.01925 =
         0.03123   -0.00378   -0.00133    0.00004
C4A   1    0.222041    0.430562   -0.533323    21.00000    0.02347    0.01881 =
         0.03163    0.00003    0.00162    0.00130
C5A   1    0.407061    0.835324   -0.410573    21.00000    0.02954    0.02750 =
         0.02248   -0.00257    0.00195    0.00286
N1A   3    0.138523    0.250745   -0.501725    21.00000    0.02883    0.01937 =
         0.02598   -0.00276    0.00070   -0.00292
AFIX  43
H1A   2    0.102087    0.156323   -0.533510    21.00000   -1.20000
AFIX   0
N2A   3    0.177654    0.352527   -0.375659    21.00000    0.03761    0.03144 =
         0.01999    0.00301    0.00278   -0.00075
AFIX  43
H2A   2    0.165509    0.329871   -0.327406    21.00000   -1.20000
AFIX   0
N3A   3    0.374182    0.763793   -0.482498    21.00000    0.02883    0.01937 =
         0.02598   -0.00276    0.00070   -0.00292
AFIX  43
H3A   2    0.402701    0.826507   -0.524441    21.00000   -1.20000
AFIX   0
N4A   3    0.336539    0.686436   -0.359206    21.00000    0.02976    0.02279 =
         0.02460   -0.00170    0.00341   -0.00149
AFIX  43
H4A   2    0.339188    0.694997   -0.310100    21.00000   -1.20000
AFIX   0
O1A   4    0.031524    0.050360   -0.402115    21.00000    0.03225    0.02819 =
         0.03673   -0.00748   -0.00465   -0.00895
O2A   4    0.233535    0.449228   -0.602991    21.00000    0.03705    0.02583 =
         0.02666    0.00582    0.00204   -0.00433
O3A   4    0.489806    0.998642   -0.392440    21.00000    0.03869    0.02499 =
         0.03951   -0.00538   -0.00338   -0.01079
PART 0
PART 2
C1B   1    0.388575    0.793693   -0.427485   -21.00000    0.02619    0.02222 =
         0.02882    0.00631    0.00273   -0.00034
C2B   1    0.238477    0.481044   -0.402431   -21.00000    0.02229    0.01925 =
         0.03123   -0.00378   -0.00133    0.00004
C3B   1    0.218414    0.432256   -0.477632   -21.00000    0.02229    0.01925 =
         0.03123   -0.00378   -0.00133    0.00004
C4B   1    0.279723    0.568085   -0.533456   -21.00000    0.02347    0.01881 =
         0.03163    0.00003    0.00162    0.00130
C5B   1    0.090380    0.172318   -0.408330   -21.00000    0.02954    0.02750 =
         0.02248   -0.00257    0.00195    0.00286
N1B   3    0.360931    0.744953   -0.501544   -21.00000    0.02883    0.01937 =
         0.02598   -0.00276    0.00070   -0.00292
AFIX  43
H1B   2    0.399236    0.836975   -0.533860   -21.00000   -1.20000
AFIX   0
N2B   3    0.320364    0.653123   -0.373315   -21.00000    0.03761    0.03144 =
         0.01999    0.00301    0.00278   -0.00075
AFIX  43
H2B   2    0.329884    0.674721   -0.324891   -21.00000   -1.20000
AFIX   0
N3B   3    0.125338    0.239240   -0.479721   -21.00000    0.02883    0.01937 =
         0.02598   -0.00276    0.00070   -0.00292
AFIX  43
H3B   2    0.095043    0.173297   -0.520797   -21.00000   -1.20000
AFIX   0
N4B   3    0.160300    0.322735   -0.358864   -21.00000    0.02976    0.02279 =
         0.02460   -0.00170    0.00341   -0.00149
AFIX  43
H4B   2    0.155902    0.318495   -0.309707   -21.00000   -1.20000
AFIX   0
O1B   4    0.468268    0.956746   -0.406363   -21.00000    0.03225    0.02819 =
         0.03673   -0.00748   -0.00465   -0.00895
O2B   4    0.268442    0.544222   -0.604649   -21.00000    0.03705    0.02583 =
         0.02666    0.00582    0.00204   -0.00433
O3B   4    0.003509    0.004740   -0.395178   -21.00000    0.03869    0.02499 =
         0.03951   -0.00538   -0.00338   -0.01079

PART 0
OW1   4   -0.088665   -0.227942   -0.279396    11.00000    0.06374    0.07730 =
         0.04855    0.00282    0.00672   -0.00207
HW1A  2   -0.050684   -0.139338   -0.313300    11.00000   -1.50000
HW1B  2   -0.159562   -0.307326   -0.308696    11.00000   -1.50000

OW2   4    0.406163    0.750650   -0.217145    11.00000    0.07350    0.07786 =
         0.04744    0.01191   -0.00203   -0.00022
HW2A  2    0.330474    0.798073   -0.171595    11.00000   -1.50000
HW2B  2    0.449685    0.643820   -0.195817    11.00000   -1.50000
HKLF 4


REM  uracdih_100k_a.res in P2(1)/c
REM wR2 = 0.1304, GooF = S = 1.059, Restrained GooF = 1.059 for all data
REM R1 = 0.0475 for 1265 Fo > 4sig(Fo) and 0.0570 for all 1518 data
REM 166 parameters refined using 0 restraints

END

WGHT      0.0838      0.0333

REM Highest difference peak  0.286,  deepest hole -0.200,  1-sigma level  0.063
Q1    1   0.2956  0.6773 -0.2194  11.00000  0.05    0.29
Q2    1   0.0983  0.2508 -0.2799  11.00000  0.05    0.25
Q3    1   0.4545  0.7500 -0.2813  11.00000  0.05    0.22
Q4    1   0.1564  0.3327 -0.6035  11.00000  0.05    0.22
Q5    1   0.3513  0.5360 -0.6042  11.00000  0.05    0.22
Q6    1   0.4203  0.7868 -0.6003  11.00000  0.05    0.22
Q7    1  -0.2192 -0.2116 -0.2758  11.00000  0.05    0.22
Q8    1   0.3307  0.6969 -0.5999  11.00000  0.05    0.21
Q9    1  -0.0896 -0.3753 -0.2208  11.00000  0.05    0.20
Q10   1   0.1467  0.5436 -0.6038  11.00000  0.05    0.20
Q11   1  -0.1818 -0.1230 -0.2625  11.00000  0.05    0.20
Q12   1   0.1016  0.2191 -0.3734  11.00000  0.05    0.19
Q13   1  -0.0922 -0.0003 -0.3974  11.00000  0.05    0.19
Q14   1   0.4391  0.9593 -0.5343  11.00000  0.05    0.19
Q15   1   0.0780  0.1681 -0.6023  11.00000  0.05    0.19
Q16   1   0.2328  0.4931 -0.5039  11.00000  0.05    0.18
Q17   1   0.2597  0.7350 -0.4989  11.00000  0.05    0.17
Q18   1  -0.0180  0.2197 -0.4968  11.00000  0.05    0.16
Q19   1   0.0183  0.0347 -0.4669  11.00000  0.05    0.16
Q20   1   0.3234  0.9997 -0.3975  11.00000  0.05    0.16
;
_shelx_res_checksum                93215
_shelx_hkl_file
;
   0   0   1    0.13    0.15
   0   0  -1    0.12    0.12
   0   0   1    0.03    0.16
   0   0   1    0.23    0.16
   0   0   2 2214.63   72.72
   0   0   2 2202.08   72.66
   0   0   2 2268.37   72.72
   0   0  -2 2242.29   72.69
   0   0   2 2243.76   72.71
   0   0  -2 2221.85   72.64
   0   0  -3    0.27    0.23
   0   0   3    0.33    0.28
   0   0   3    0.64    0.48
   0   0   3    0.20    0.51
   0   0   3    0.90    0.51
   0   0  -3    0.69    0.39
   0   0   4  343.67   11.22
   0   0   4  339.52   11.36
   0   0   4  328.07   11.36
   0   0   4  340.26   11.36
   0   0  -4  340.38   11.29
   0   0   5    1.47    0.82
   0   0   5    0.75    0.80
   0   0  -5    1.35    0.64
   0   0   6  640.04   21.14
   0   0   6  634.35   21.15
   0   0   6  635.34   21.15
   0   0  -6  628.34   21.02
   0   0   7    0.32    0.79
   0   0   7   -0.18    0.82
   0   0   7    0.25    0.84
   0   0   8 1694.00   56.16
   0   0   8 1714.42   56.14
   0   0   8 1695.01   56.16
   0   0   9    0.68    0.97
   0   0   9    0.28    0.88
   0   0   9    0.28    1.06
   0   0  10 2040.98   66.68
   0   0  10 1992.74   66.75
   0   0  11    0.69    1.09
   0   0  11    2.02    1.17
   0   0  12    8.58    1.27
   0   0  12    5.16    0.91
   0   0  12    5.19    1.31
   0   0  13   -0.49    0.87
   0   0  13   -0.16    1.18
   0   0  13    0.86    1.13
   0   0  14    4.94    1.24
   0   0  14    3.89    1.30
   0   0  14    2.52    1.30
   0   0  14    1.31    1.26
   0   0  15   -0.76    1.19
   0   0  15    3.16    1.35
   0   0  16  287.60   10.47
   0   0  16  298.39   10.49
   0   0  17    0.28    1.18
   0   0  17   -0.83    1.27
   0   0  18    1.03    1.22
   0   0  18    2.08    1.14
   0   0  19   -0.53    1.10
   0   0  19   -0.30    1.02
   0   0  20    0.06    0.85
   0   0  20   -1.12    0.92
   0   0  21    0.29    0.75
   0   0  21   -1.02    0.79
   0   0  21    0.37    0.68
   0  -1   0    0.23    0.33
   0   1   0    0.23    0.39
   0   1   0    0.07    0.42
   0   1   0   -0.04    0.57
   0   1   1  328.54   10.73
   0  -1  -1  327.66   10.69
   0   1   1  318.29   10.86
   0   1  -1  333.90   10.80
   0   1   1  323.87   10.85
   0   1   1  314.06   10.91
   0  -1   1  315.81   10.68
   0   1   1  327.03   10.79
   0   1   2    1.40    0.36
   0   1   2    1.94    0.56
   0   1   2    1.55    0.77
   0   1   2    1.70    0.59
   0  -1   2    1.14    0.53
   0   1   2    0.81    0.54
   0   1   2    0.95    0.60
   0  -1  -2    1.26    0.39
   0   1   2    1.54    0.41
   0   1  -2    1.02    0.52
   0   1   3   51.85    2.14
   0   1   3   55.15    2.20
   0   1   3   54.64    1.90
   0   1  -3   53.83    2.11
   0  -1   3   52.99    2.11
   0   1  -3   55.61    2.19
   0   1   3   53.32    2.13
   0   1   3   57.27    2.32
   0   1   3   57.09    2.11
   0   1  -4    1.51    0.83
   0   1  -4    1.85    0.60
   0   1   4    1.71    0.68
   0  -1   4    1.88    0.80
   0   1   4    2.13    0.77
   0  -1   5  152.33    5.30
   0   1  -5  149.12    5.33
   0   1   5  145.63    5.32
   0   1  -5  151.99    5.23
   0   1   5  143.55    5.26
   0   1   6    1.21    0.65
   0   1  -6    0.77    0.84
   0   1   6    1.34    0.81
   0  -1   6    1.55    0.88
   0   1  -7  412.53   14.47
   0  -1   7  432.76   14.46
   0   1   7  431.09   14.50
   0   1   8    9.40    1.15
   0  -1   8    6.17    1.16
   0   1  -8    6.35    1.18
   0  -1   9    1.94    1.04
   0   1   9    1.10    0.91
   0  -1  10    4.38    1.28
   0   1  10    6.77    1.28
   0   1  11  112.83    4.69
   0  -1  11  108.40    4.66
   0  -1  11  104.22    4.65
   0  -1  12    0.78    1.19
   0   1  12    0.87    0.99
   0   1  12    1.21    1.17
   0   1  12    1.28    1.16
   0  -1  12    0.81    1.24
   0  -1  12    0.86    1.10
   0  -1  13   60.10    3.41
   0  -1  13   60.27    2.92
   0   1  13   61.54    2.87
   0  -1  13   61.96    3.42
   0   1  13   66.83    2.98
   0   1  13   68.87    3.51
   0   1  14    6.90    1.32
   0  -1  14    6.62    1.48
   0   1  14    6.50    1.42
   0  -1  14    4.88    1.57
   0  -1  15    1.17    1.28
   0   1  15    0.82    1.27
   0   1  15    2.64    1.19
   0  -1  16   -0.86    1.19
   0  -1  16    0.28    1.29
   0   1  16    0.46    1.14
   0   1  16   -1.11    1.27
   0   1  17    3.23    1.34
   0  -1  17    2.75    1.19
   0  -1  17    3.40    1.28
   0   1  17    2.22    1.13
   0  -1  18   -0.42    1.20
   0   1  18    0.98    1.05
   0   1  18   -0.66    1.15
   0  -1  18    0.75    1.08
   0   1  19    7.02    1.21
   0  -1  19    8.28    1.13
   0  -1  19    6.06    1.19
   0   1  19    8.42    1.09
   0   1  19    7.92    1.20
   0  -1  20    0.06    0.81
   0   1  20    1.17    0.81
   0   1  20    1.75    0.94
   0   1  20    0.11    0.88
   0  -1  20    1.64    0.93
   0   1  21    2.59    0.80
   0  -1  21    3.34    0.71
   0   2   0  463.80   15.72
   0   2   0  458.66   15.44
   0   2  -1    1.47    0.74
   0   2   1    0.56    0.99
   0   2   1    1.76    0.73
   0   2   1    0.76    0.73
   0   2   1   -1.19    1.11
   0   2  -1    0.76    1.12
   0   2   1    1.74    1.14
   0   2   2  523.09   17.56
   0   2  -2  524.87   17.40
   0   2   2  510.40   17.39
   0   2   2  523.14   17.55
   0   2   2  516.82   17.29
   0   2  -3   39.19    2.06
   0   2   3   38.88    2.16
   0   2   3   38.24    2.06
   0   2   4 2661.10   86.34
   0   2   4 2626.45   86.61
   0   2  -4 2614.25   86.33
   0   2   4 2628.22   86.44
   0   2   5   20.32    1.65
   0   2   5   22.86    1.62
   0   2  -5   21.68    1.66
   0   2   5   19.76    1.70
   0   2   5   20.23    1.94
   0   2   6  872.46   28.95
   0   2  -6  857.54   28.87
   0   2   6  853.64   28.90
   0   2   6  888.79   29.19
   0   2   7    0.22    1.11
   0   2   7   -0.08    0.73
   0   2   7   -0.86    0.88
   0   2   8    0.60    1.05
   0   2   8    0.29    0.90
   0   2   8    1.13    0.83
   0   2   9    1.31    1.00
   0   2   9   -0.40    1.11
   0   2  10   93.17    4.18
   0   2  10   95.18    4.45
   0   2  11    0.17    1.25
   0   2 -11    0.57    1.03
   0  -2  11   -0.13    1.21
   0   2  11    1.69    1.24
   0  -2  12    0.44    1.29
   0   2  12   -0.48    1.22
   0  -2  13    6.88    1.68
   0  -2  13    6.44    1.56
   0   2  13    6.13    1.54
   0   2  14  990.46   33.36
   0   2  15    0.24    1.31
   0  -2  16   81.12    3.45
   0   2  16   74.09    3.67
   0   2  17    1.20    1.18
   0  -2  17    1.72    1.06
   0   2  18    0.78    1.12
   0  -2  18    2.09    1.01
   0   2  19    1.05    0.99
   0  -2  19    2.85    0.91
   0  -2  20   52.49    2.16
   0   2  20   48.53    2.31
   0   3   0   -0.43    1.17
   0   3   0   -0.08    0.76
   0   3   0    0.60    1.13
   0   3   0    0.90    1.16
   0   3   1    2.89    1.22
   0   3  -1    4.34    0.89
   0   3   1    3.16    0.80
   0   3   1    3.99    1.19
   0   3  -1    3.43    1.24
   0   3   2    2.88    1.45
   0   3  -2    2.54    0.92
   0   3   2    3.06    1.22
   0   3  -2    1.90    1.32
   0   3  -3  441.37   15.26
   0   3   3  452.31   15.51
   0   3  -3  437.21   15.67
   0   3  -4    2.98    0.99
   0   3   4    4.62    1.19
   0   3  -5   68.73    3.06
   0   3   5   63.80    3.17
   0   3  -6    7.07    1.19
   0   3   6    6.81    1.30
   0   3  -7  332.31   11.84
   0   3   9    4.98    1.22
   0   3  -9    3.60    1.11
   0   3   9    3.30    0.96
   0   3  10    2.45    1.25
   0  -3  10    0.83    0.88
   0   3 -10   -0.18    1.02
   0   3  11   72.51    3.48
   0  -3  11   79.79    3.30
   0   3 -11   75.10    3.40
   0   3  12    0.79    1.34
   0  -3  12    1.78    0.95
   0   3 -12    1.23    1.20
   0  -3  13   26.59    1.76
   0   3 -13   25.25    1.97
   0   3  13   27.19    2.08
   0   3 -14    1.79    1.27
   0   3  14    0.60    1.33
   0   3 -15   47.43    2.75
   0   3  15   54.95    2.88
   0   3  16    1.43    1.23
   0   3  17   11.84    1.45
   0   3  18    2.21    1.01
   0   3  19    0.13    0.82
   0   4   0 1169.10   39.41
   0   4   0 1159.46   39.39
   0   4   1   19.96    2.38
   0   4  -1   27.16    2.51
   0   4   1   23.04    2.53
   0   4  -1   21.79    2.41
   0   4  -1   17.94    2.39
   0   4   2   53.99    3.43
   0   4  -2   62.92    3.58
   0   4   2   59.18    3.44
   0   4  -2   62.34    3.56
   0   4   3    9.34    1.65
   0   4  -3    3.06    1.69
   0   4  -4   75.92    4.17
   0   4   4   75.36    3.13
   0   4   4   71.18    3.41
   0   4   4   75.73    3.22
   0   4   4   69.93    3.70
   0   4   5   10.59    1.33
   0   4  -5   10.33    2.17
   0   4  -5    9.96    1.29
   0   4   5   10.70    1.58
   0   4   5   10.39    1.39
   0   4   5   10.79    1.68
   0   4   6   32.11    2.48
   0   4   6   33.45    2.25
   0   4  -6   35.43    2.03
   0   4   6   37.45    2.00
   0   4  -6   39.34    3.07
   0   4  -7    4.10    1.20
   0   4  -7    6.53    1.94
   0   4   7    7.47    1.48
   0   4   7    6.77    1.22
   0   4   8   64.05    2.89
   0   4  -8   62.91    2.95
   0  -4   8   61.93    2.81
   0   4   8   64.47    3.12
   0   4   9    6.02    1.53
   0   4  -9    2.85    1.23
   0   4   9    4.79    1.25
   0  -4   9    3.85    1.11
   0  -4  10  323.81   11.14
   0   4 -10  307.55   11.23
   0   4  10  315.51   11.37
   0   4 -11   13.91    1.71
   0   4  11   18.67    1.89
   0  -4  11   18.47    1.64
   0  -4  12   35.40    2.07
   0   4  12   33.91    2.35
   0   4 -12   32.75    2.19
   0  -4  13    6.47    1.27
   0   4  13    9.81    1.65
   0   4 -13    9.46    1.48
   0  -4  14    0.17    0.98
   0   4 -14    2.41    1.23
   0   4  14    2.91    1.32
   0   4 -15   -0.10    1.12
   0   4  15    0.62    1.16
   0  -4  15    0.30    0.87
   0   4 -16   15.03    1.60
   0   4 -16   12.65    1.40
   0   4  16   16.46    1.48
   0   4 -17    7.07    1.27
   0   4 -17    6.73    1.13
   0   4  17    7.78    1.17
   0   4 -18   40.64    2.12
   0   4  18   46.19    2.05
   0   5   0    1.07    1.26
   0   5   0    2.92    1.34
   0   5   0    4.70    1.66
   0   5   0    0.72    1.10
   0   5  -1  125.68    5.04
   0   5   1  132.74    5.96
   0   5   1  131.53    5.02
   0   5  -1  136.41    6.08
   0   5  -1  123.78    5.13
   0   5  -1  126.70    5.96
   0   5   1  123.87    5.13
   0   5   2    0.35    1.05
   0   5   2   -0.94    1.23
   0   5  -2   -0.10    1.32
   0   5  -2   -0.47    1.10
   0   5   2    2.61    1.27
   0   5  -2    0.67    1.51
   0   5  -2   -0.43    1.68
   0   5  -3   61.49    3.83
   0   5   3   58.85    3.53
   0   5   3   53.29    2.86
   0   5  -3   54.54    3.72
   0   5   3   59.50    2.79
   0   5   4    1.41    1.08
   0   5  -4    0.94    1.69
   0   5   4    1.21    1.17
   0   5  -4   -0.26    1.72
   0   5   5    1.78    1.06
   0   5   6    0.27    1.03
   0   5  -6    0.30    1.07
   0   5   7   38.25    2.16
   0   5  -7   35.02    2.18
   0  -5   8    5.71    1.12
   0   5  -8    4.00    1.27
   0   5   8    6.14    1.21
   0   5   9   14.26    1.44
   0   5  -9   12.02    1.45
   0  -5   9   11.95    1.32
   0   5 -10    6.81    1.33
   0  -5  10    5.44    1.20
   0  -5  11    5.73    1.16
   0   5 -11    4.37    1.17
   0  -5  12    1.74    1.03
   0   5 -12    5.10    1.16
   0  -5  13    1.22    0.96
   0   5 -13    2.12    1.16
   0   5 -13    3.28    1.04
   0   5 -14   -0.53    1.06
   0  -5  14   -0.67    0.83
   0   5 -14   -0.16    0.90
   0   5 -15   15.45    1.37
   0   5 -15   13.85    1.25
   0   5 -16   -0.76    0.73
   0   5 -16    0.82    0.85
   0   6   0    7.96    1.22
   0   6   0    6.86    1.42
   0   6  -1    3.41    1.36
   0   6   1    3.98    1.22
   0   6   1    2.66    1.27
   0   6  -1    2.65    1.16
   0   6  -2   64.21    3.16
   0   6   2   65.71    2.98
   0   6   2   58.26    2.99
   0   6  -3   22.78    2.18
   0   6   3   28.23    2.00
   0   6   3   28.49    2.09
   0   6   4  488.97   16.69
   0   6  -4  484.34   16.88
   0   6  -5    3.76    1.48
   0   6   5    3.09    1.08
   0   6  -6   94.26    4.14
   0   6   6   92.69    3.87
   0   6  -7    2.56    1.39
   0   6   7    4.18    1.07
   0   6  -8    0.39    1.21
   0   6  -9   -0.23    0.87
   0   6 -10    1.49    0.84
   0   6 -11    0.45    0.74
   0  -6  11    0.17    0.72
   0   6 -12    1.31    0.87
   0   6 -12    0.79    0.68
   0   6 -13    1.67    0.64
   0   6 -13    0.93    0.79
   0   7   0   -0.87    0.98
   0   7   1    8.16    1.02
   0   7  -1    8.91    1.17
   0   7  -2    1.25    0.99
   0   7   2    2.21    0.82
   0   7  -3    6.86    1.10
   0   7   3    7.14    0.93
   0   7  -4   -0.92    0.97
   0   7   4    0.49    0.71
   0   7   5    3.97    0.76
   0   7  -5    0.95    0.92
   0   7  -6    0.13    0.82
   0   7  -7    3.96    0.89
   0   7  -8    1.22    0.76
   0   7  -9    0.48    0.64
  -1   0  21   -0.42    0.73
  -1   0  21   -1.11    0.74
  -1   0  21    0.85    0.61
  -1   0  20    6.16    1.03
  -1   0  20    6.17    1.02
  -1   0  20    7.67    0.98
  -1   0  19    1.13    1.01
  -1   0  19    0.55    0.94
  -1   0  18   51.81    2.49
  -1   0  18   49.53    2.57
  -1   0  17    0.97    1.05
  -1   0  17   -0.53    1.25
  -1   0  16  142.52    5.78
  -1   0  16  156.97    5.81
  -1   0  15    0.54    1.29
  -1   0  15   -0.41    0.97
  -1   0  14    5.97    1.41
  -1   0  14    2.02    1.26
  -1   0  14    4.04    1.44
  -1   0  14    4.53    1.05
  -1   0  13   -0.49    1.16
  -1   0  13   -1.28    1.29
  -1   0  13    0.53    0.95
  -1   0  13   -0.07    0.89
  -1   0  13   -0.48    1.20
  -1   0  13   -0.61    1.23
  -1   0  12    5.27    1.31
  -1   0  12    3.70    1.29
  -1   0  12    3.31    0.87
  -1   0  12    5.36    0.99
  -1   0  11    0.64    1.03
  -1   0  11    0.75    1.18
  -1   0  10    2.99    1.04
  -1   0  10    1.94    1.05
  -1   0  10    1.73    1.06
  -1   0   9   -0.46    0.94
  -1   0   9    0.09    0.88
  -1   0   9    0.87    1.00
  -1   0   8  247.78    8.54
  -1   0   8  233.08    8.47
   1   0  -8  230.91    8.47
  -1   0   8  241.07    8.51
  -1   0   7    0.78    0.88
  -1   0   7    0.68    0.83
  -1   0   7    0.26    0.74
   1   0  -7    0.38    0.85
  -1   0   6  672.68   22.05
  -1   0   6  648.32   22.02
  -1   0   6  669.39   22.03
   1   0  -6  652.18   22.03
   1   0  -5    0.50    0.74
  -1   0   5    0.26    0.68
  -1   0   5    0.21    0.56
  -1   0   5    0.05    0.79
  -1   0   5   -0.04    0.77
  -1   0   4  392.69   13.52
  -1   0   4  409.94   13.51
  -1   0   4  414.79   13.59
   1   0  -4  405.77   13.57
  -1   0   3    1.08    0.54
  -1   0   3    1.66    0.54
  -1   0   3    0.66    0.71
   1   0  -3    1.29    0.67
  -1   0   2  803.00   26.00
  -1   0   2  781.52   26.10
   1   0  -2  790.98   26.00
  -1   0   2  795.24   26.13
  -1   0   1   -0.33    0.44
  -1   0   1    0.36    0.22
  -1   0   1    0.11    0.19
   1   0   0    0.22    0.37
  -1   0   0    0.12    0.44
   1   0   1    0.20    0.20
   1   0   1   -0.01    0.20
   1   0   1   -0.13    0.42
   1   0   2  815.14   26.62
   1   0   2  806.36   26.51
   1   0   3    1.08    0.68
   1   0   3    1.55    0.55
   1   0   4  436.07   14.38
   1   0   4  426.08   14.46
   1   0   5    0.61    0.83
   1   0   5   -0.36    0.74
   1   0   5    1.07    0.84
   1   0   5    0.35    0.70
   1   0   6  694.77   23.29
   1   0   6  683.54   23.19
   1   0   6  701.09   23.21
   1   0   6  707.06   23.20
   1   0   7    0.74    0.96
   1   0   7   -0.18    0.87
   1   0   7    0.18    0.80
   1   0   7    0.59    0.76
   1   0   8  236.85    8.52
   1   0   8  240.54    8.45
   1   0   8  235.57    8.61
   1   0   8  237.74    8.48
   1   0   9    0.43    0.95
   1   0   9    0.38    0.87
   1   0   9    0.82    0.91
   1   0   9   -0.83    1.00
   1   0  10    2.32    1.11
   1   0  10    3.32    1.06
   1   0  10    2.17    1.14
   1   0  11    0.56    1.22
   1   0  11   -0.77    1.06
   1   0  12    6.75    1.36
   1   0  12    5.32    1.25
   1   0  12    5.79    1.14
   1   0  12    5.48    1.61
   1   0  13   -0.58    1.15
   1   0  13    0.24    1.20
   1   0  13    0.31    1.10
   1   0  13    0.83    1.21
   1   0  14    3.50    1.35
   1   0  14    4.43    1.37
   1   0  14    4.52    1.30
   1   0  15   -0.10    1.24
   1   0  15    0.65    1.28
   1   0  16  153.11    5.90
   1   0  16  147.78    5.86
   1   0  17   -0.67    1.16
   1   0  17   -0.57    1.29
   1   0  18   56.74    2.85
   1   0  18   59.72    2.85
   1   0  19    1.31    1.14
   1   0  19    1.30    1.04
   1   0  20    9.14    1.13
   1   0  20    6.91    1.10
   1   0  20    9.18    1.07
   1   0  21   -1.08    0.70
   1   0  21   -0.27    0.70
  -1  -1  21    0.35    0.59
  -1  -1  20   10.87    1.09
  -1   1  20   11.55    1.08
  -1  -1  20   12.59    1.08
  -1   1  20    9.47    1.13
  -1   1  19    6.38    1.11
  -1  -1  19    7.08    1.05
  -1  -1  19    5.37    1.11
  -1   1  19    5.47    1.15
  -1  -1  18   11.30    1.33
  -1  -1  18   10.76    1.38
  -1   1  18   11.81    1.44
  -1   1  18   10.79    1.36
  -1  -1  17   31.72    2.02
  -1   1  17   29.99    2.02
  -1  -1  17   28.96    1.98
  -1   1  17   34.48    1.95
  -1  -1  16   42.72    2.24
  -1   1  16   49.56    2.51
  -1   1  16   42.02    2.33
  -1  -1  16   47.44    2.52
  -1  -1  15    3.90    1.04
  -1  -1  15    4.28    1.37
  -1   1  15    5.77    1.16
  -1   1  15    6.28    1.16
  -1   1  15    3.59    1.37
  -1  -1  14    6.81    1.44
  -1   1  14    5.83    1.35
  -1  -1  14    6.66    1.12
  -1  -1  14    5.77    1.59
  -1   1  14    6.61    1.17
  -1  -1  13   23.93    2.19
  -1   1  13   28.14    2.22
  -1  -1  13   22.92    1.59
  -1   1  13   25.87    1.86
  -1  -1  13   28.93    1.86
  -1   1  13   25.82    1.66
  -1  -1  13   24.59    2.21
  -1  -1  13   20.71    2.06
  -1  -1  12   57.28    3.14
  -1  -1  12   56.39    2.56
  -1  -1  12   55.58    3.11
  -1  -1  12   62.52    3.27
  -1   1  12   64.82    3.24
  -1   1  12   55.96    2.56
  -1   1  12   59.77    2.63
  -1   1  11    0.25    1.09
  -1  -1  11    1.29    1.19
  -1  -1  11    0.72    1.12
  -1   1  11    0.06    0.77
   1   1 -11    0.14    1.27
  -1   1  11    0.72    1.08
  -1  -1  11    1.52    1.00
  -1  -1  10   86.05    3.90
   1   1 -10   89.58    4.03
  -1   1  10   88.31    3.89
  -1   1  10   87.38    3.90
  -1  -1  10   97.67    4.02
  -1  -1   9   81.21    3.67
  -1   1   9   93.64    3.74
  -1   1   9   82.79    3.67
   1   1  -9   89.21    3.79
   1   1  -8  151.67    5.58
  -1   1   8  143.70    5.46
  -1  -1   8  144.03    5.50
  -1   1   8  141.28    5.46
  -1   1   7   17.34    1.25
  -1   1   7   16.73    1.32
  -1   1   7   13.82    1.16
   1   1  -7   16.88    1.36
   1   1  -6  664.37   21.99
  -1   1   6  650.94   21.93
  -1   1   6  635.32   21.93
  -1   1   6  671.93   22.03
  -1   1   6  663.54   21.93
  -1   1   5   73.28    2.92
   1   1  -5   75.35    2.97
  -1   1   5   73.67    3.03
  -1   1   5   74.83    2.94
  -1   1   5   71.76    2.92
  -1   1   4 1085.60   35.64
  -1   1   4 1079.75   35.62
  -1   1   4 1079.36   35.63
  -1   1   4 1065.70   35.72
   1   1  -4 1092.99   35.63
  -1  -1   3   75.31    2.85
   1   1  -3   74.90    2.88
  -1   1   3   76.54    2.90
  -1  -1   3   76.58    2.97
  -1   1   3   75.02    2.87
  -1  -1   2  415.36   13.65
  -1   1   2  399.61   13.56
  -1   1   2  412.24   13.55
  -1  -1   2  395.72   13.49
   1   1  -2  411.25   13.51
  -1  -1   1   10.77    0.88
  -1   1   1   10.58    0.74
   1   1  -1   12.70    1.04
  -1   1   1    8.69    0.49
  -1   1   1    8.74    0.76
  -1  -1   1    8.70    0.72
   1   1  -1   10.76    0.71
  -1   1   1   11.15    0.82
   1   1   0    3.60    0.51
   1   1   0    1.22    0.71
  -1   1   0    1.73    0.58
  -1   1   0    1.14    0.70
  -1  -1   0    3.24    0.82
   1   1   0    4.89    0.97
   1   1   0    2.85    0.72
  -1   1  -1   11.99    0.79
   1   1   1    9.82    0.85
   1   1   1    9.99    0.80
   1   1   1   12.18    1.06
   1   1   1   11.24    0.56
  -1  -1  -1    9.28    0.92
   1   1   1   11.37    0.91
   1   1   2  401.04   13.33
   1   1   2  388.44   13.30
  -1   1  -2  405.09   13.32
  -1  -1  -2  401.65   13.40
   1   1   3   75.05    2.78
  -1   1  -3   69.42    2.72
   1   1   3   72.55    2.74
   1   1   3   69.56    2.63
   1   1   4 1062.82   35.45
  -1   1  -4 1079.06   35.32
   1   1   4 1065.55   35.23
   1   1   4 1081.67   35.33
   1  -1   5   84.71    3.26
   1   1   5   86.78    3.22
  -1   1  -5   78.02    3.10
   1   1   5   78.02    3.07
   1   1   5   86.06    3.39
   1   1   5   80.44    3.16
   1  -1   6  661.06   21.29
   1   1   6  630.30   21.24
   1   1   6  633.68   21.43
   1   1   6  617.76   21.25
   1   1   7   22.59    1.73
   1  -1   7   19.52    1.44
   1  -1   7   20.32    1.48
   1   1   7   21.39    1.41
   1  -1   8  134.34    5.33
   1  -1   8  138.82    5.29
   1   1   8  141.75    5.30
   1   1   8  138.28    5.53
   1  -1   8  141.25    5.31
   1  -1   9   90.65    3.78
   1  -1   9   90.96    3.85
   1   1   9   90.41    3.80
   1  -1   9   83.88    3.75
   1   1  10   93.13    4.01
   1  -1  10   92.33    4.07
   1  -1  10   91.50    4.02
   1  -1  10   91.23    3.96
   1   1  11    0.76    1.12
   1  -1  11   -0.13    1.14
   1   1  11    0.20    0.87
   1  -1  11   -0.12    1.15
   1  -1  11    0.90    1.03
   1  -1  12   53.82    2.61
   1  -1  12   55.99    3.11
   1   1  12   51.70    2.57
   1   1  12   54.88    2.57
   1  -1  12   56.72    3.08
   1   1  12   61.46    3.11
   1  -1  13   25.13    2.25
   1  -1  13   25.49    2.28
   1   1  13   32.12    1.91
   1  -1  13   32.91    1.91
   1  -1  13   28.29    1.93
   1   1  13   25.53    2.22
   1   1  13   29.54    1.89
   1   1  14    8.76    1.35
   1  -1  14    9.99    1.44
   1   1  14    7.89    1.45
   1  -1  14    9.11    1.35
   1  -1  14    7.95    1.62
   1  -1  15    3.08    1.23
   1   1  15    5.63    1.33
   1  -1  15    5.98    1.39
   1   1  15    4.60    1.29
   1  -1  16   47.78    2.48
   1   1  16   48.03    2.54
   1   1  16   47.69    2.53
   1  -1  17   31.59    2.00
   1   1  17   33.00    2.10
   1  -1  17   31.06    2.10
   1   1  17   31.81    2.06
   1   1  18   11.17    1.37
   1  -1  18   11.75    1.33
   1   1  18    9.28    1.42
   1  -1  18    8.36    1.39
   1   1  18    8.25    1.38
   1  -1  19    7.01    1.08
   1   1  19    5.51    1.17
   1  -1  19    7.11    1.21
   1   1  19    6.19    1.10
   1   1  19    5.85    1.17
   1   1  20   11.00    1.17
   1  -1  20   12.90    1.09
   1   1  20   11.13    1.10
  -1  -2  20    3.33    0.75
  -1   2  20    4.81    0.89
  -1  -2  19    7.73    0.98
  -1   2  19    6.81    1.11
  -1   2  18    5.77    1.22
  -1  -2  18    5.50    1.10
  -1   2  17    4.15    1.25
  -1   2  16    5.86    1.42
   1   2 -15    5.59    1.44
  -1   2  15    6.13    1.46
  -1   2  14    3.01    1.33
   1   2 -14    2.77    1.32
  -1  -2  13   59.47    3.59
   1   2 -13   58.61    3.17
  -1   2  12    5.08    1.37
  -1  -2  12    3.53    1.37
  -1  -2  12    6.80    1.37
  -1   2  11    3.26    1.27
  -1  -2  11    1.74    1.14
  -1  -2  11    5.72    1.32
  -1  -2  10    1.19    1.16
  -1  -2  10    4.10    1.15
  -1   2  10    1.13    1.06
  -1   2   9  182.11    6.96
  -1   2   8  150.59    5.69
   1   2  -8  142.07    5.73
  -1   2   8  145.72    5.67
  -1   2   7   51.67    2.70
  -1   2   7   54.58    2.55
  -1   2   7   50.64    2.52
   1   2  -7   46.94    2.55
  -1   2   6  169.50    5.98
   1   2  -6  152.27    5.94
   1   2  -6  155.16    5.96
  -1   2   6  159.84    5.94
  -1   2   5   88.69    3.74
  -1   2   5   92.62    3.70
   1   2  -5   93.65    3.75
   1   2  -5   94.06    3.77
  -1   2   4  205.30    7.23
   1   2  -4  203.90    7.24
  -1   2   4  202.46    7.29
   1   2  -4  199.34    7.27
  -1   2   3  213.09    7.67
  -1   2   3  222.49    7.76
   1   2  -3  219.79    7.73
  -1  -2   2  186.60    6.56
   1   2  -2  174.89    6.50
  -1   2   2  185.15    6.44
  -1   2   2  185.05    6.48
  -1   2   2  184.24    6.66
  -1   2   2  184.40    6.61
  -1   2   1    9.14    1.22
  -1  -2   1    8.19    0.99
  -1   2   1    7.31    1.23
  -1   2   1    8.55    0.90
  -1   2   1    7.11    0.85
   1   2  -1    5.87    1.30
  -1  -2   0    1.05    0.82
  -1   2   0    0.27    1.10
  -1   2   0    1.56    0.73
  -1   2   0    0.26    0.64
  -1   2   0    0.45    1.10
   1   2   0    0.91    1.15
  -1   2  -1    6.08    0.79
   1   2   1    5.66    0.86
   1   2   1    5.67    1.26
   1   2   1    6.13    1.18
   1   2   1    4.57    1.10
  -1   2  -1    4.63    1.25
   1   2   2  179.17    6.70
   1   2   2  192.58    6.74
   1   2   2  180.21    6.80
   1   2   2  185.61    6.47
   1   2   2  186.91    6.68
   1   2   3  246.13    8.39
   1   2   3  223.65    8.47
   1   2   3  237.91    8.35
   1   2   4  209.89    7.56
   1  -2   4  213.49    7.41
   1   2   4  212.97    7.71
   1   2   4  208.09    7.58
   1   2   5   81.57    3.45
   1   2   5   82.11    3.43
   1  -2   5   82.34    3.32
   1   2   5   81.29    3.60
   1  -2   6  171.49    6.29
   1   2   6  176.18    6.39
   1   2   6  168.64    6.58
   1   2   7   48.55    2.69
   1   2   7   53.31    2.53
   1  -2   7   49.23    2.41
   1  -2   8  148.29    5.77
   1   2   8  153.29    5.90
   1   2   8  154.71    6.17
   1  -2   9  182.21    6.75
   1   2   9  172.88    6.83
   1  -2   9  177.71    6.84
   1   2   9  176.88    7.14
   1   2  10    1.27    1.13
   1   2  10    0.99    1.23
   1  -2  10    0.25    1.07
   1  -2  10    0.73    1.24
   1   2  11    6.16    1.28
   1  -2  11    4.20    1.31
   1   2  11    3.16    1.41
   1   2  11    3.65    1.03
   1   2  12    6.07    1.42
   1   2  12    5.90    1.22
   1   2  12    6.36    1.62
   1  -2  12    4.35    1.41
   1   2  13   70.38    4.02
   1   2  13   68.68    3.29
   1   2  13   65.06    2.98
   1   2  14    1.74    1.33
   1   2  14    5.09    1.23
   1   2  15    6.12    1.28
   1   2  15    6.96    1.45
   1   2  16    6.29    1.28
   1   2  16    9.43    1.50
   1   2  17    4.94    1.15
   1   2  17    1.71    1.21
   1   2  18    6.59    1.27
   1   2  18    5.08    1.11
   1   2  19    4.35    1.09
   1   2  19    7.63    1.02
  -1   2 -20    4.39    1.17
   1   2  20    4.18    0.88
  -1   3  19    2.54    0.87
  -1   3  18   16.31    1.42
  -1   3  17    1.41    1.12
   1   3 -17    0.69    1.14
   1   3 -16    8.44    1.46
  -1   3  16    9.60    1.47
   1   3 -15   12.30    1.59
  -1   3  15   12.38    1.57
  -1   3  14    3.88    1.41
   1   3 -14    6.11    1.41
  -1  -3  13   45.05    2.32
   1   3 -13   45.74    2.58
  -1   3  13   43.52    2.63
  -1   3  12    8.12    1.52
   1   3 -12    5.35    1.38
   1   3 -11   19.82    1.67
  -1   3  11   18.12    1.79
   1   3 -10   24.80    1.74
  -1   3  10   23.46    1.82
   1   3  -9  124.19    5.00
  -1   3   9  136.46    5.47
  -1   3   9  129.07    5.12
  -1   3   8  256.21    9.20
  -1   3   8  268.77    9.62
   1   3  -8  253.16    9.12
  -1   3   8  259.40    9.06
  -1   3   7   24.08    1.77
   1   3  -7   23.70    1.84
  -1   3   6    6.75    1.19
   1   3  -6    5.74    1.19
  -1   3   6    5.02    1.22
  -1   3   5  165.24    6.28
   1   3  -5  165.71    6.33
  -1   3   5  164.78    6.45
  -1   3   4   87.32    3.92
   1   3  -4   88.75    3.76
  -1   3   4   87.18    3.71
  -1   3   3    7.89    1.27
   1   3  -3    7.04    1.52
  -1   3   3    9.92    1.16
   1   3  -3   10.28    1.22
  -1   3   2   65.03    3.14
  -1   3   2   60.53    2.79
  -1   3   2   64.55    3.11
   1   3  -2   63.16    2.87
   1   3  -2   70.36    3.43
  -1   3   1  164.96    6.02
  -1   3   1  159.79    6.28
   1   3  -1  164.39    6.44
   1   3  -1  160.14    6.02
  -1   3   1  160.01    6.29
  -1   3   1  158.87    5.95
  -1   3   0    6.63    1.04
   1   3   0    7.98    1.48
   1   3   0    6.22    1.43
  -1   3   0    5.48    1.45
   1   3   0    8.58    1.47
   1   3   0    5.94    1.06
  -1   3   0    9.35    1.47
  -1   3   0    9.16    1.39
   1   3   1  160.02    6.22
  -1   3  -1  160.61    6.00
   1   3   1  158.72    5.89
   1   3   1  150.38    6.21
  -1   3  -1  163.63    6.36
   1   3   2   63.40    3.17
   1   3   2   73.92    3.34
  -1   3  -2   66.33    3.35
   1   3   3   10.04    1.31
  -1   3  -3    8.42    1.49
   1   3   4   71.81    3.36
   1   3   5  171.13    6.66
   1   3   6    5.73    1.41
   1   3   6    6.21    1.30
   1   3   7   19.71    1.98
  -1   3  -7   18.91    1.57
   1  -3   8  263.99    9.36
  -1   3  -8  271.28    9.50
   1   3   8  275.73   10.27
   1   3   8  267.34    9.56
   1   3   9  135.24    5.72
   1   3   9  121.78    4.87
  -1   3  -9  118.42    4.77
   1   3   9  121.13    4.70
   1  -3   9  121.48    4.67
   1  -3  10   22.80    1.58
  -1   3 -10   24.51    1.74
   1   3  10   23.55    1.87
   1   3  10   21.40    2.24
   1  -3  11   20.21    1.57
  -1   3 -11   20.73    1.66
   1   3  11   17.41    1.75
   1   3  11   18.77    2.22
   1   3  12    7.91    1.53
   1  -3  12    5.35    1.12
  -1   3 -12    4.64    1.28
   1  -3  13   48.47    2.42
   1   3  13   47.66    2.75
   1   3  14    3.90    1.40
   1  -3  14    3.44    1.06
   1   3  15   11.01    1.58
   1   3  16   10.23    1.48
  -1   3 -16    9.81    1.53
  -1   3 -17    1.79    1.35
   1   3  17    1.79    1.11
   1   3  18   11.63    1.31
  -1   3 -18   14.17    1.53
   1   3  19   -0.66    0.79
  -1   3 -19    0.20    1.00
   1   4 -18    0.50    0.86
   1   4 -18    0.98    0.78
   1   4 -17    7.48    1.11
  -1   4  17    8.98    1.11
   1   4 -16    1.04    1.02
  -1   4  16    1.63    1.04
  -1  -4  15    2.91    0.88
   1   4 -15    4.05    1.23
  -1   4  15    0.79    1.19
  -1  -4  14   13.45    1.27
   1   4 -14   11.83    1.47
  -1   4  14   11.68    1.56
  -1  -4  13    2.11    1.04
   1   4 -13    2.01    1.18
  -1   4  13    3.63    1.36
   1   4 -12   17.17    1.62
  -1  -4  12   16.85    1.50
  -1   4  12   12.69    1.69
  -1   4  11   11.11    1.66
   1   4 -11   14.40    1.58
  -1   4  10   19.52    1.88
   1   4 -10   22.45    1.76
   1   4  -9   11.57    2.29
   1   4  -9   10.89    1.38
  -1   4   9   11.79    1.67
   1   4  -8   15.46    2.34
   1   4  -8   13.46    1.73
  -1   4   8   13.50    1.70
  -1   4   8   17.92    1.45
   1   4  -8   15.70    1.48
   1   4  -7   24.78    2.09
   1   4  -7   22.55    2.64
   1   4  -7   25.89    1.77
  -1   4   7   26.67    1.67
  -1   4   7   24.96    2.01
  -1   4   6    7.58    1.13
  -1   4   6    6.09    1.35
   1   4  -6    7.66    1.98
   1   4  -6    6.38    1.33
  -1   4   6    7.17    1.46
   1   4  -5   28.07    2.69
  -1   4   5   31.22    1.80
   1   4  -5   27.63    2.08
  -1   4   5   24.81    2.13
  -1   4   5   26.77    1.64
  -1   4   5   28.86    2.11
  -1   4   4   49.44    3.12
   1   4  -4   56.60    3.01
  -1   4   4   56.34    2.53
  -1   4   4   59.05    2.66
   1   4  -4   53.91    3.53
   1   4  -3    3.81    1.26
  -1   4   3    7.54    1.47
   1   4  -3    4.72    1.18
   1   4  -3    6.69    1.82
  -1   4   2   10.15    1.53
   1   4  -2    9.69    1.88
   1   4  -2   10.04    1.29
   1   4  -2   12.63    1.82
  -1   4   1   63.21    3.48
   1   4  -1   58.94    3.43
   1   4  -1   59.82    3.49
   1   4  -1   65.88    3.13
  -1   4   1   65.03    3.39
  -1   4   0    2.17    1.06
  -1   4   0    3.19    1.33
  -1   4   0    1.85    1.54
   1   4   0    3.20    1.48
   1   4   0    3.15    1.40
   1   4   1   62.50    3.45
  -1   4  -1   53.39    3.29
  -1   4  -1   66.82    3.16
   1   4   1   59.01    3.34
  -1   4  -1   62.32    3.46
   1   4   2    7.41    1.44
  -1   4  -2    9.14    1.76
  -1   4  -2   11.38    1.74
  -1   4  -2   11.47    1.84
  -1   4  -2   14.04    1.45
  -1   4  -3    1.34    1.48
   1   4   3    4.06    1.38
  -1   4  -3    4.02    1.20
   1   4   3    5.93    1.17
   1   4   4   64.04    3.40
  -1   4  -4   60.41    3.19
  -1   4  -4   62.04    2.93
  -1   4  -4   64.26    2.84
   1   4   4   57.89    2.75
  -1   4  -4   52.99    3.58
   1   4   4   63.09    2.82
   1   4   5   29.54    1.75
  -1   4  -5   32.44    1.91
   1   4   5   27.26    2.20
   1   4   5   28.82    1.81
  -1   4  -5   24.56    1.97
  -1   4  -5   28.33    1.95
  -1   4  -5   22.52    2.41
   1   4   5   30.77    2.06
  -1   4  -6    6.64    1.24
   1  -4   6    5.54    0.99
   1   4   6    5.32    1.12
  -1   4  -6    6.41    1.24
   1   4   6    5.25    1.28
  -1   4  -6    5.38    1.38
  -1   4  -6    4.84    1.80
   1   4   6   11.18    1.54
   1   4   7   26.58    1.99
  -1   4  -7   23.34    2.01
   1   4   7   26.80    1.73
   1  -4   7   29.27    1.65
  -1   4  -7   26.33    2.04
  -1   4  -7   28.22    1.86
  -1   4  -7   23.38    2.70
   1   4   8   13.29    1.40
   1   4   8   16.53    1.70
  -1   4  -8   14.72    1.47
  -1   4  -8   17.81    1.85
  -1   4  -8   14.56    2.39
   1  -4   8   14.89    1.36
   1   4   9    9.67    1.66
   1   4   9   11.69    1.33
  -1   4  -9   10.78    1.70
  -1   4  -9    9.80    1.37
  -1   4  -9   11.66    2.12
   1  -4   9   10.56    1.25
  -1   4 -10   18.47    1.94
   1   4  10   23.94    2.02
   1  -4  10   18.82    1.58
  -1   4 -10   21.38    1.73
   1   4  11   13.09    1.69
   1  -4  11   11.62    1.35
  -1   4 -11   10.25    1.70
  -1   4 -11   13.20    1.52
   1  -4  12   19.96    1.58
  -1   4 -12   16.04    1.80
  -1   4 -12   15.16    1.60
   1   4  12   18.64    1.86
  -1   4 -13    2.98    1.36
   1  -4  13    3.37    1.05
  -1   4 -13    1.44    1.14
   1   4  13    1.03    1.35
  -1   4 -14   16.66    1.69
   1   4  14   13.47    1.58
  -1   4 -14   15.16    1.52
  -1   4 -15    4.00    1.30
  -1   4 -15    3.66    1.12
  -1   4 -15    2.51    1.27
   1   4  15    2.57    1.21
  -1   4 -16   -0.23    1.09
  -1   4 -16   -0.20    1.13
   1   4  16    0.60    1.02
  -1   4 -17   11.48    1.32
   1   4  17   10.40    1.14
   1   5 -16   -0.12    0.76
   1   5 -16    0.61    0.67
  -1  -5  15    2.61    0.72
   1   5 -15    0.95    0.80
   1   5 -15    2.31    0.96
  -1  -5  14    7.43    0.98
   1   5 -14    7.43    1.09
  -1  -5  13    5.23    0.99
   1   5 -13    5.90    1.11
  -1  -5  12   35.78    1.96
   1   5 -12   33.80    2.03
  -1  -5  11    3.10    1.05
   1   5 -11    4.34    1.12
  -1  -5  10    2.72    1.05
   1   5 -10    6.44    1.22
   1   5  -9    9.08    1.41
  -1  -5   9    8.89    1.22
   1   5  -9    7.14    1.25
  -1  -5   8    5.60    1.13
   1   5  -8    5.37    1.37
  -1   5   8    5.21    1.14
   1   5  -7    3.96    1.34
  -1   5   7    2.94    1.05
   1   5  -6    0.86    1.32
  -1   5   6    1.45    1.04
  -1   5   5   22.23    1.60
   1   5  -5   19.57    1.83
   1   5  -4   44.76    2.56
  -1   5   4   43.61    2.43
   1   5  -4   45.45    3.50
   1   5  -4   49.56    3.66
  -1   5   4   49.71    2.41
   1   5  -3    2.14    1.36
   1   5  -3    5.80    1.34
  -1   5   3    2.11    1.16
   1   5  -3    1.83    1.75
   1   5  -3    2.14    1.69
   1   5  -2    0.69    1.49
  -1   5   2    0.28    1.19
   1   5  -2    0.59    1.15
   1   5  -2   -0.52    1.26
   1   5  -2    1.99    1.72
  -1   5   2    0.99    1.23
   1   5  -1   10.71    1.98
   1   5  -1    7.34    1.29
   1   5  -1    8.81    1.48
   1   5  -1    8.12    1.66
  -1   5   1    8.27    1.31
  -1   5   1    5.80    1.47
   1   5   0    0.66    1.10
   1   5   0   -0.63    1.57
   1   5   0   -1.49    1.43
   1   5   0   -0.20    1.25
  -1   5   0   -1.34    1.25
  -1   5   0    0.82    1.28
  -1   5   0   -1.01    1.55
  -1   5  -1   10.41    1.47
  -1   5  -1    6.98    1.60
   1   5   1    9.38    1.72
  -1   5  -1    8.46    1.94
   1   5   1    7.73    1.31
   1   5   1   11.55    1.45
  -1   5  -2    1.82    1.29
  -1   5  -2    0.18    1.11
   1   5   2    2.45    1.51
   1   5   2    1.24    1.18
  -1   5  -2    2.78    1.57
  -1   5  -2    1.10    1.38
   1   5   2    1.66    1.12
   1   5   3    2.91    1.24
   1   5   3    2.58    1.17
   1   5   3    1.62    1.28
  -1   5  -3    2.83    1.37
  -1   5  -3    3.24    1.52
  -1   5  -3    2.00    1.58
  -1   5  -3    3.69    1.25
  -1   5  -4   43.58    3.00
  -1   5  -4   44.52    3.47
  -1   5  -4   53.65    2.60
  -1   5  -4   47.34    3.58
   1   5   4   51.21    2.57
   1   5   4   52.62    2.62
   1   5   5   25.81    1.77
  -1   5  -5   22.27    1.75
  -1   5  -6    1.34    1.20
   1   5   6    0.36    1.07
   1   5   7    4.10    1.13
  -1   5  -7    1.26    1.11
   1   5   8    6.03    1.17
   1  -5   8    4.92    1.09
  -1   5  -8    5.94    1.25
   1   5   9    7.85    1.18
   1  -5   9    8.41    1.14
  -1   5  -9    7.51    1.36
  -1   5  -9    7.80    1.30
  -1   5 -10    3.47    1.24
   1  -5  10    2.48    1.04
  -1   5 -10    5.39    1.22
  -1   5 -11    2.27    1.24
   1  -5  11    3.94    1.06
  -1   5 -11    2.98    1.11
  -1   5 -12   30.54    2.04
  -1   5 -12   29.71    1.89
  -1   5 -13    8.85    1.31
  -1   5 -13    6.86    1.15
  -1   5 -14    8.96    1.29
  -1   5 -14    7.02    1.07
  -1   5 -15    5.50    1.06
  -1   5 -15    4.13    0.90
  -1   5 -16    0.61    0.86
   1   6 -13    6.20    0.72
   1   6 -13    7.44    0.86
  -1  -6  12    3.48    0.71
   1   6 -12    4.48    0.95
   1   6 -12    3.36    0.71
  -1  -6  11    0.45    0.72
   1   6 -11    1.38    0.95
  -1  -6  10    1.76    0.79
   1   6 -10    1.41    1.08
   1   6  -9   11.19    1.41
   1   6  -8   15.99    1.60
   1   6  -7    8.49    1.38
   1   6  -7    7.06    1.24
   1   6  -6   27.65    1.91
   1   6  -6   31.18    2.12
  -1   6   6   29.12    1.78
  -1   6   5    5.57    1.05
   1   6  -5    6.16    1.42
   1   6  -5    5.93    1.30
   1   6  -4    0.69    1.14
   1   6  -4    3.89    1.40
   1   6  -3   65.38    3.13
   1   6  -3   63.87    3.21
   1   6  -2   74.91    3.51
  -1   6   2   77.83    3.50
   1   6  -2   84.08    3.67
   1   6  -1    8.29    1.34
  -1   6   1   12.29    1.49
   1   6  -1   10.91    1.58
   1   6   0    1.70    1.24
   1   6   0    2.14    1.13
  -1   6   0    2.06    1.27
  -1   6  -1    8.22    1.43
   1   6   1    8.78    1.39
   1   6   1    6.87    1.26
   1   6   2   77.57    3.48
   1   6   2   79.12    3.46
  -1   6  -2   74.19    3.51
   1   6   3   65.81    3.05
  -1   6  -3   64.73    3.22
   1   6   4    2.40    1.14
  -1   6  -4    3.55    1.41
  -1   6  -5    6.75    1.44
   1   6   5    5.08    1.17
  -1   6  -6   32.93    2.15
   1   6   6   27.66    1.79
  -1   6  -6   29.81    1.84
  -1   6  -7    9.77    1.49
  -1   6  -7    8.77    1.19
   1   6   7    7.86    1.16
  -1   6  -8   17.13    1.61
  -1   6  -8   14.74    1.37
  -1   6  -9   11.39    1.41
  -1   6  -9   12.62    1.23
  -1   6 -10    2.45    1.12
  -1   6 -10    1.42    0.84
  -1   6 -11    2.16    0.97
  -1   6 -11    1.34    0.79
  -1   6 -12    4.88    0.81
  -1   6 -12    4.21    0.91
  -1   6 -13    6.13    0.86
  -1   6 -13    6.21    0.76
   1   7  -8   18.97    1.18
   1   7  -7    4.05    0.86
   1   7  -6    8.34    1.01
   1   7  -5    2.51    0.77
   1   7  -5    3.28    0.95
   1   7  -4    1.60    0.81
   1   7  -4    1.73    0.88
   1   7  -3   34.79    1.86
   1   7  -3   33.48    1.80
   1   7  -2   37.49    1.93
   1   7  -2   34.50    1.84
   1   7  -1   11.57    1.21
   1   7  -1    9.92    1.12
   1   7   0    1.51    0.86
  -1   7  -1   13.93    1.27
   1   7   1   12.67    1.19
   1   7   2   38.43    1.91
  -1   7  -2   37.16    1.97
  -1   7  -3   27.39    1.69
   1   7   3   28.80    1.57
  -1   7  -4    1.86    0.88
   1   7   4    2.30    0.77
   1   7   5    1.36    0.73
  -1   7  -5    2.01    0.92
   1   7   6    7.94    0.89
  -1   7  -6    7.62    0.97
  -1   7  -7    4.62    0.85
  -1   7  -8   18.26    1.15
  -2   0  20    1.10    0.81
  -2   0  19   -0.50    0.97
  -2   0  19    0.18    0.78
  -2   0  18   15.92    1.48
  -2   0  18   16.49    1.35
  -2   0  17    0.63    1.00
  -2   0  17   -0.33    1.20
  -2   0  16    2.21    1.30
  -2   0  16    2.99    1.02
  -2   0  15    1.04    0.92
  -2   0  15   -0.36    1.25
  -2   0  14   36.19    2.07
  -2   0  14   34.45    1.98
  -2   0  13    1.54    0.98
  -2   0  13   -0.44    0.94
  -2   0  13   -0.86    1.32
  -2   0  12   41.25    2.10
  -2   0  12   41.66    2.07
  -2   0  12   40.93    2.70
  -2   0  11    0.06    0.77
  -2   0  11    2.34    1.26
  -2   0  11   -0.06    0.79
  -2   0  10   60.99    3.14
   2   0 -10   64.27    3.25
   2   0  -9    0.11    1.10
  -2   0   9   -0.11    1.01
  -2   0   8  140.70    5.40
   2   0  -8  133.41    5.38
  -2   0   7    0.88    0.97
   2   0  -7    0.33    0.93
  -2   0   6  422.89   14.24
  -2   0   6  429.22   14.41
   2   0  -6  408.74   14.39
   2   0  -5    0.82    0.84
  -2   0   5    0.32    0.90
  -2   0   5    0.47    0.70
  -2   0   4    1.53    0.73
  -2   0   4    0.89    0.72
  -2   0   3    0.92    0.73
  -2   0   3    0.44    0.75
  -2   0   2  537.29   17.97
  -2   0   1    0.44    0.78
  -2   0   0  202.73    7.14
   2   0   0  203.10    7.00
   2   0   1    0.82    0.77
   2   0   1    0.49    0.59
   2   0   2  580.64   19.15
   2   0   2  568.73   19.04
   2   0   3    0.81    0.85
   2   0   3    0.36    0.77
   2   0   4    3.37    0.98
   2   0   4    2.79    0.91
   2   0   5    1.30    0.87
   2   0   5    1.38    0.92
   2   0   6  451.94   15.54
   2   0   6  456.13   15.54
   2   0   7    1.22    0.96
   2   0   7    1.27    0.98
   2   0   7   -0.09    0.98
   2   0   8  144.27    5.74
   2   0   8  147.60    5.80
   2   0   8  148.41    5.63
   2   0   9    0.66    0.94
   2   0   9   -0.28    0.98
   2   0   9    1.21    1.16
   2   0  10   52.78    2.76
   2   0  10   56.04    3.09
   2   0  11   -0.62    0.95
   2   0  11   -0.16    1.28
   2   0  11   -0.94    1.08
   2   0  11    0.07    1.11
   2   0  12   39.82    2.22
   2   0  12   35.73    2.05
   2   0  12   40.21    2.81
   2   0  13    1.40    1.47
   2   0  13   -1.14    1.26
   2   0  13    1.43    1.09
   2   0  14   32.01    2.19
   2   0  14   34.07    2.11
   2   0  15    0.29    1.15
   2   0  15    0.58    1.29
   2   0  16    2.25    1.37
   2   0  16    3.84    1.31
   2   0  17   -1.97    1.32
   2   0  17    0.09    1.15
   2   0  18   16.97    1.52
   2   0  19    0.49    0.96
   2   0  20    0.66    0.79
  -2  -1  20   10.95    0.96
  -2   1  20    9.20    0.95
  -2  -1  20    9.79    0.97
  -2  -1  19    9.82    1.16
  -2   1  19   12.46    1.19
  -2  -1  19   13.49    1.12
  -2   1  18    2.82    1.08
  -2  -1  18    1.70    1.07
  -2  -1  18    2.48    1.03
  -2  -1  17   20.83    1.47
  -2  -1  17   22.88    1.72
  -2   1  17   23.03    1.74
  -2  -1  16    5.22    1.02
  -2  -1  16    4.80    1.31
  -2   1  16    5.33    1.28
  -2   1  15  239.24    8.71
  -2  -1  15  244.57    8.83
  -2  -1  15  231.34    8.66
  -2   1  15  261.67    8.89
  -2  -1  14  184.70    6.75
  -2   1  14  183.48    6.78
  -2  -1  13  116.03    4.33
  -2   1  13  127.10    4.42
  -2   1  13  116.08    4.32
  -2  -1  13  125.11    5.35
  -2   1  12    2.22    0.91
  -2  -1  12    1.45    0.88
  -2   1  12    2.95    0.97
  -2  -1  12    2.56    1.19
  -2  -1  12    0.32    1.22
   2   1 -12    1.98    1.52
  -2   1  11  124.60    4.84
  -2   1  11  131.10    4.81
  -2  -1  11  117.16    4.97
  -2  -1  11  141.85    5.61
   2   1 -11  136.19    5.67
  -2  -1  11  132.49    4.82
   2   1 -10  184.54    7.08
  -2  -1  10  167.57    6.92
  -2   1  10  181.58    6.88
  -2  -1   9  657.65   21.96
  -2   1   9  630.83   21.86
   2   1  -9  636.63   21.99
  -2   1   8  213.35    7.72
  -2  -1   8  205.89    7.79
   2   1  -8  217.52    7.89
   2  -1  -8  207.64    7.83
   2  -1  -7    8.83    1.21
  -2  -1   7    9.38    1.22
   2   1  -7   11.11    1.28
  -2  -1   6   23.41    1.54
   2   1  -6   20.02    1.52
  -2  -1   5 1231.80   40.96
   2   1  -5 1245.12   40.95
  -2  -1   4  254.63    8.82
  -2  -1   4  242.20    8.72
   2   1  -4  251.97    8.66
  -2  -1   3   90.09    3.61
   2   1  -3   90.89    3.45
  -2  -1   2  109.51    4.37
   2   1  -2  117.41    4.15
   2   1  -2  114.55    4.47
  -2   1   2  110.70    4.18
  -2   1   1 4432.91  144.53
   2   1  -1 4402.81  144.78
  -2  -1   1 4420.58  144.74
   2   1  -1 4430.33  144.44
   2   1   0 9999.00  321.24
  -2  -1   0 9835.42  321.22
  -2   1   0 9759.50  320.97
  -2   1  -1 4247.72  137.87
  -2  -1  -1 4164.11  138.28
  -2  -1  -2  101.46    3.99
   2   1   2   93.47    3.71
  -2  -1  -3   86.67    3.64
   2   1   3   85.44    3.41
   2   1   4  251.32    8.86
   2   1   5 1275.08   42.82
   2   1   5 1308.73   42.81
   2   1   6   19.22    1.54
   2   1   6   20.37    1.64
   2   1   7    9.22    1.27
   2  -1   7    8.82    1.33
   2   1   7    9.30    1.41
   2  -1   7   11.36    1.29
   2  -1   8  220.77    8.03
   2   1   8  208.74    8.05
   2   1   8  227.31    8.28
   2  -1   8  216.91    8.09
   2  -1   9  644.00   21.87
   2   1   9  642.16   22.18
   2  -1   9  635.20   21.97
   2  -1  10  173.04    6.94
   2   1  10  182.84    7.20
   2  -1  10  173.04    6.81
   2  -1  11  149.59    5.65
   2   1  11  130.16    5.11
   2   1  11  131.17    5.12
   2  -1  11  131.54    5.13
   2  -1  11  141.85    5.80
   2   1  12    1.86    1.08
   2  -1  12    2.05    1.37
   2   1  12    1.11    1.19
   2  -1  12    3.92    1.15
   2   1  13  117.93    4.81
   2  -1  13  124.39    4.88
   2  -1  13  114.21    5.60
   2   1  13  125.14    4.85
   2   1  14  176.69    6.67
   2  -1  14  177.96    6.70
   2   1  14  177.05    6.70
   2   1  15  258.66    9.15
   2  -1  15  246.28    9.11
   2   1  15  248.20    9.11
   2   1  16    4.57    1.31
   2  -1  16    6.10    1.47
   2   1  16    5.21    1.35
   2   1  17   23.97    1.79
   2  -1  17   19.05    1.76
   2   1  17   21.56    1.74
   2   1  18    1.26    1.10
   2   1  19    9.03    1.17
  -2   1 -20    7.91    1.39
   2   1  20    9.50    1.01
  -2  -2  20    3.06    0.66
  -2  -2  19    2.18    0.82
   2   2 -17    0.64    1.18
  -2   2  16   38.57    1.98
  -2  -2  16   33.20    1.87
   2   2 -16   36.41    2.41
  -2  -2  15   12.10    1.25
  -2   2  15   13.85    1.27
   2   2 -15   13.14    1.68
  -2  -2  14    5.13    1.02
  -2   2  14    1.42    0.98
  -2  -2  13   35.29    1.90
  -2   2  13   33.76    1.92
  -2  -2  12    6.98    1.04
  -2   2  12    6.10    1.05
  -2  -2  12    4.00    1.32
  -2  -2  11   73.86    2.85
  -2   2  11   69.98    2.83
   2   2 -11   72.48    3.72
  -2  -2  10    2.42    0.84
  -2  -2  10    0.18    1.07
  -2   2  10    2.25    0.86
   2   2 -10    0.76    1.29
  -2  -2   9    0.49    0.96
  -2   2   9    0.98    1.03
  -2   2   9    1.49    0.77
   2   2  -9    0.13    1.25
  -2   2   8   19.90    1.63
   2   2  -8   24.01    1.85
   2   2  -7  298.60   10.88
   2   2  -7  295.62   10.75
  -2   2   7  308.24   10.76
  -2   2   6    5.88    1.08
   2   2  -6    8.55    1.22
  -2   2   5    4.63    1.00
   2   2  -5    3.83    1.00
  -2  -2   4  291.66    9.89
  -2   2   4  268.74    9.74
   2   2  -4  273.33    9.69
  -2  -2   3   91.98    3.70
  -2   2   3   85.37    3.54
   2   2  -3   85.57    3.47
  -2  -2   2    2.08    0.95
  -2   2   2    2.23    0.78
  -2   2   1   11.29    1.01
   2   2  -1   11.67    1.51
  -2   2   0   78.20    3.27
  -2   2   0   81.40    3.17
   2   2   0   83.45    3.61
  -2   2  -1   11.08    1.09
   2   2   1   10.35    1.34
  -2  -2  -1   11.44    1.27
  -2   2  -2    2.01    0.81
   2   2   2    1.96    1.18
  -2  -2  -2    2.71    1.04
  -2   2  -3   92.01    3.74
   2   2   3  100.23    3.96
  -2  -2  -3   88.11    3.89
   2   2   3   89.24    3.80
   2   2   4  285.41    9.93
  -2   2  -4  268.95    9.80
   2   2   4  288.52    9.98
  -2  -2  -4  270.67    9.98
  -2   2  -5    2.99    0.87
   2   2   5    5.22    1.13
   2   2   5    5.59    1.16
  -2   2  -6    3.97    0.91
   2  -2   6    5.89    1.16
   2   2   6    6.19    1.22
   2   2   6    4.35    1.18
   2   2   7  318.73   11.09
   2   2   7  284.30   10.88
   2  -2   7  307.57   10.80
   2   2   8   25.33    2.01
   2  -2   8   20.01    1.72
   2   2   9    2.47    1.06
   2  -2   9    3.23    1.20
   2  -2   9    0.81    1.17
   2   2   9    1.94    1.34
   2   2  10   -1.09    1.28
   2  -2  10    1.62    0.87
   2  -2  10    3.06    1.24
   2  -2  10    2.54    1.44
   2   2  10    2.51    1.15
   2   2  11   92.09    4.51
   2  -2  11   80.15    4.06
   2  -2  11   79.09    3.88
   2   2  11   78.48    3.48
   2  -2  12    6.48    1.51
   2   2  12    5.91    1.27
   2   2  12    6.21    1.74
   2   2  13   33.18    2.09
   2   2  14    3.95    1.26
   2   2  15   11.84    1.45
   2   2  16   45.97    2.51
   2   2  17    0.26    1.08
   2   2  18   -0.22    0.96
  -2   2 -19    3.27    1.37
  -2   2 -20    2.12    1.09
   2   3 -18    8.61    1.18
  -2  -3  18   11.54    1.01
   2   3 -17    1.26    1.07
   2   3 -16    3.96    1.25
   2   3 -15   98.52    4.31
  -2   3  14  140.75    5.25
   2   3 -14  136.04    5.58
  -2   3  13   36.92    1.99
   2   3 -13   36.08    2.34
  -2   3  12   18.93    1.47
   2   3 -12   14.81    1.69
  -2   3  11  100.42    4.05
   2   3 -11  102.89    4.29
  -2   3  10   37.23    1.95
  -2   3  10   34.26    2.50
   2   3 -10   35.21    2.09
   2   3  -9  124.33    4.74
  -2   3   9  118.81    4.61
  -2   3   9  121.17    5.27
  -2   3   8   21.39    1.44
   2   3  -8   24.52    1.49
  -2   3   7   31.82    1.66
  -2   3   7   29.63    2.08
   2   3  -7   30.74    1.73
   2   3  -7   26.09    2.17
  -2   3   6   41.27    2.39
   2   3  -6   41.18    2.50
  -2   3   5  252.04    9.25
   2   3  -5  253.44    9.41
  -2   3   4  379.36   13.54
   2   3  -4  394.03   13.68
  -2   3   3    4.11    0.97
   2   3  -3    4.35    1.08
  -2  -3   2   14.03    1.51
  -2   3   2   13.17    1.34
   2   3  -2   10.57    1.36
  -2   3   1  228.30    8.40
  -2  -3   1  234.97    8.55
   2   3  -1  229.39    8.43
  -2   3   0  673.67   22.56
   2   3   0  654.39   22.48
  -2   3  -1  262.18    9.53
  -2   3  -2   10.91    1.39
  -2   3  -3    3.15    1.04
   2   3   3    4.95    1.34
   2   3   4  455.10   15.45
  -2   3  -4  424.40   15.32
  -2   3  -5  237.13    9.04
   2   3   5  253.85    9.13
   2   3   5  242.07    9.22
  -2   3  -6   40.70    2.42
   2   3   6   42.97    2.65
  -2   3  -7   28.88    2.09
  -2   3  -7   26.33    1.97
   2  -3   7   32.87    1.78
  -2   3  -7   29.39    1.83
   2   3   7   30.73    2.33
   2   3   8   19.42    2.12
   2  -3   8   17.87    1.44
  -2   3  -8   23.34    1.65
   2   3   9  113.95    5.33
   2  -3   9  109.73    4.48
  -2   3  -9  116.64    4.56
   2  -3  10   39.98    2.12
  -2   3 -10   40.21    2.30
   2  -3  10   39.01    2.78
   2   3  10   34.08    2.85
   2   3  10   42.47    2.22
  -2   3 -11  103.34    4.67
   2  -3  11  114.36    4.53
   2   3  11  113.25    4.59
  -2   3 -12   27.32    2.08
   2   3  12   25.20    1.90
  -2   3 -13   36.84    2.39
   2   3  13   39.95    2.25
  -2   3 -14  136.87    5.58
  -2   3 -15   96.40    4.21
  -2   3 -16    0.83    1.43
  -2   3 -17    3.41    1.39
  -2   3 -18    9.39    1.47
  -2   3 -19   31.13    1.86
   2   4 -17    2.74    0.84
   2   4 -16    0.23    0.91
  -2  -4  15   21.85    1.39
   2   4 -15   22.08    1.65
  -2  -4  14    1.26    0.88
   2   4 -14    0.56    1.05
  -2  -4  13    3.79    1.05
   2   4 -13    5.19    1.27
   2   4 -12   23.78    1.79
   2   4 -11   23.42    1.81
  -2   4  10    3.31    0.97
   2   4 -10    3.11    1.16
   2   4  -9    0.76    1.13
  -2   4   9    2.16    0.94
  -2   4   8   14.47    1.35
   2   4  -8   15.24    1.89
  -2   4   7   90.67    3.69
  -2   4   7   90.40    4.35
   2   4  -7   90.31    4.44
  -2   4   6    9.06    1.12
  -2   4   6   10.09    1.49
  -2   4   5    1.90    1.12
  -2   4   5    4.01    1.00
   2   4  -5    3.61    1.29
  -2   4   4    5.90    1.26
   2   4  -4    6.94    1.30
  -2   4   4    7.58    1.09
  -2   4   3  124.10    4.77
   2   4  -3  124.30    5.27
   2   4  -2    6.59    1.29
   2   4  -2    6.84    1.33
  -2   4   2    6.95    1.23
   2   4  -1   46.25    2.41
  -2   4   1   47.96    2.40
   2   4  -1   45.26    2.61
   2   4   0   79.33    3.51
  -2   4   0   85.56    3.94
  -2   4   0   84.50    3.43
  -2   4   0   83.44    3.54
  -2   4  -1   49.14    2.80
   2   4   1   47.11    2.41
  -2   4  -1   47.02    2.31
  -2   4  -1   48.70    2.43
  -2   4  -2    5.80    1.26
  -2   4  -2   10.49    1.20
  -2   4  -2    6.65    1.27
   2   4   2    8.11    1.23
   2   4   3  111.91    4.51
  -2   4  -3  111.21    5.03
  -2   4  -3  118.18    4.55
  -2   4  -4    6.70    1.34
   2   4   4    7.19    1.18
  -2   4  -4    6.56    1.38
  -2   4  -4    6.05    1.14
  -2   4  -5   -0.16    1.03
  -2   4  -5    2.14    1.13
  -2   4  -5    2.87    1.41
   2   4   5    2.31    1.08
  -2   4  -6    6.92    1.38
  -2   4  -6    8.37    1.64
  -2   4  -6    4.71    1.24
  -2   4  -6    6.25    1.27
  -2   4  -7   89.41    4.51
  -2   4  -7   98.10    4.17
   2  -4   7   96.45    3.96
  -2   4  -7  101.55    4.37
  -2   4  -7   98.95    4.15
  -2   4  -8   10.61    1.80
  -2   4  -8   10.36    1.53
   2  -4   8   13.25    1.31
  -2   4  -8   12.54    1.44
  -2   4  -9    2.34    1.32
   2  -4   9    1.83    1.00
  -2   4  -9    3.12    1.54
  -2   4  -9    1.82    1.16
  -2   4 -10    2.77    1.49
  -2   4 -10    1.36    1.29
   2  -4  10    1.60    1.06
  -2   4 -10    1.71    1.14
  -2   4 -11   17.75    1.91
  -2   4 -11   19.11    1.77
  -2   4 -11   16.44    1.57
  -2   4 -12   22.98    2.09
  -2   4 -12   24.72    1.99
  -2   4 -12   25.15    1.79
  -2   4 -13    4.53    1.52
  -2   4 -13    4.89    1.37
  -2   4 -14    3.25    1.36
  -2   4 -14    0.11    1.19
  -2   4 -15   21.57    1.79
  -2   4 -15   19.73    1.70
  -2   4 -16   -0.08    1.11
  -2   4 -16    0.42    1.02
  -2   4 -17    1.91    0.89
  -2   4 -17    2.02    1.05
  -2  -5  15    1.29    0.59
   2   5 -15    2.15    0.71
   2   5 -14    3.25    0.92
  -2  -5  14    2.14    0.77
   2   5 -14    3.08    0.87
   2   5 -13    1.47    1.01
  -2  -5  13    0.98    0.85
   2   5 -13    0.99    0.86
  -2  -5  12   16.81    1.36
   2   5 -12   16.66    1.39
   2   5 -11   12.57    1.51
  -2  -5  11   13.39    1.34
   2   5 -11   15.59    1.38
   2   5 -10   37.38    2.27
   2   5  -9   28.75    2.10
   2   5  -8    8.52    1.52
   2   5  -7    3.23    1.36
   2   5  -6   16.44    1.80
   2   5  -5   97.39    4.37
  -2   5   5  101.56    4.07
  -2   5   4  236.91    8.50
   2   5  -4  236.10    8.78
  -2   5   3   70.00    3.08
   2   5  -3   66.12    3.30
  -2   5   2   71.62    3.18
   2   5  -2   71.77    3.41
   2   5  -1   29.84    2.04
  -2   5   1   28.86    2.02
   2   5   0  116.89    4.78
  -2   5   0  117.02    4.77
   2   5   1   24.58    1.82
  -2   5  -1   25.53    1.75
  -2   5  -1   24.70    1.93
   2   5   2   62.74    3.08
  -2   5  -2   64.28    3.03
  -2   5  -2   65.91    3.23
  -2   5  -3   71.44    3.19
   2   5   3   64.37    3.15
  -2   5  -3   69.02    3.28
   2   5   4  232.57    8.42
  -2   5  -4  228.93    8.46
  -2   5  -4  230.26    8.54
  -2   5  -5  109.74    4.53
   2   5   5  107.37    4.45
  -2   5  -5  107.95    4.62
   2   5   6   18.37    1.57
  -2   5  -6   19.63    1.78
  -2   5  -6   16.83    1.77
   2   5   7    3.60    1.07
  -2   5  -7    3.94    1.19
  -2   5  -8   10.56    1.41
  -2   5  -8   10.07    1.44
   2   5   8    9.27    1.25
  -2   5  -9   26.63    2.14
  -2   5  -9   28.73    2.00
  -2   5  -9   29.45    1.92
  -2   5 -10   44.51    2.29
  -2   5 -10   43.15    2.50
  -2   5 -11   12.44    1.61
  -2   5 -11   13.23    1.50
  -2   5 -11   12.86    1.34
  -2   5 -12   10.17    1.45
  -2   5 -12   12.60    1.46
  -2   5 -13    1.03    1.06
  -2   5 -13    0.88    0.84
  -2   5 -14    2.47    1.00
  -2   5 -14    0.38    0.78
  -2   5 -15    1.25    0.90
  -2   5 -15    1.73    0.78
  -2  -6  12    0.71    0.57
   2   6 -12    0.05    0.65
  -2  -6  11    0.88    0.64
   2   6 -11    0.51    0.76
   2   6 -10    4.32    0.99
  -2  -6  10    5.05    0.83
   2   6  -9    0.82    0.95
   2   6  -8    1.72    1.11
   2   6  -7   11.55    1.35
   2   6  -6    0.46    1.11
   2   6  -5    1.83    1.18
   2   6  -4    9.45    1.41
   2   6  -3    0.20    1.22
   2   6  -2   51.35    2.70
  -2   6   1    8.38    1.13
   2   6  -1   12.32    1.42
   2   6   0   28.52    1.92
  -2   6   0   30.68    1.80
   2   6   1   11.46    1.41
   2   6   2   47.23    2.53
  -2   6  -2   52.29    2.60
   2   6   3    3.80    1.12
  -2   6  -3    1.87    1.19
   2   6   4    9.37    1.23
  -2   6  -4   11.70    1.41
   2   6   5    2.53    0.96
  -2   6  -5    0.63    0.96
  -2   6  -5    1.27    1.15
  -2   6  -6   -0.17    0.93
  -2   6  -6   -0.87    1.11
   2   6   6    0.08    0.91
  -2   6  -7    8.79    1.16
   2   6   7   10.86    1.11
  -2   6  -7   10.89    1.29
   2   6   8    3.58    0.94
  -2   6  -8    1.09    0.93
  -2   6  -9   -0.22    0.82
  -2   6 -10    5.12    0.90
  -2   6 -11    1.20    0.69
  -2   6 -12   -0.10    0.61
   2   7  -7    1.05    0.60
   2   7  -6   36.44    1.71
   2   7  -5   21.04    1.29
   2   7  -4   94.19    3.63
   2   7  -3   31.59    1.70
   2   7  -2    7.77    1.00
   2   7  -1    9.47    1.03
   2   7   0    1.97    0.82
   2   7   1   10.65    1.06
   2   7   2   11.26    1.04
   2   7   3   35.76    1.77
   2   7   4  105.33    3.97
   2   7   5   19.11    1.19
  -2   7  -6   22.52    1.21
  -2   7  -7    0.23    0.53
  -3   0  20    9.54    0.89
  -3   0  19    0.58    0.84
  -3   0  18    4.31    1.09
  -3   0  17   -0.98    1.07
  -3   0  16    2.32    0.93
  -3   0  16    4.16    1.31
  -3   0  15    0.46    0.87
  -3   0  14   14.62    1.31
  -3   0  14   14.60    1.36
  -3   0  13    0.62    0.95
  -3   0  13   -0.30    0.90
  -3   0  12  109.83    4.36
  -3   0  12  115.65    4.44
  -3   0  12  116.68    4.55
   3   0 -12  110.77    5.37
  -3   0  11   -0.48    0.82
  -3   0  11   -0.71    0.83
  -3   0  11    0.31    0.93
   3   0 -11    0.34    1.36
  -3   0  10  150.90    5.47
  -3   0  10  144.70    5.48
  -3   0  10  162.38    5.64
   3   0 -10  141.43    6.20
   3   0  -9   -0.13    1.15
   3   0  -8    3.41    1.21
  -3   0   7    0.33    0.80
   3   0  -7    0.73    0.98
  -3   0   6  253.12    9.22
   3   0  -6  270.61    9.40
   3   0  -5    1.33    1.01
  -3   0   5    2.16    0.85
  -3   0   4  973.56   32.42
  -3   0   3    0.67    0.85
  -3   0   3    2.14    0.90
  -3   0   2  223.65    8.07
  -3   0   1    1.01    0.98
  -3   0   0    0.42    0.93
   3   0   1    2.84    1.02
  -3   0  -1    3.53    1.12
   3   0   2  238.91    8.33
  -3   0  -2  225.44    8.47
   3   0   3    3.78    1.09
   3   0   4 1067.57   35.63
   3   0   5    1.47    1.02
   3   0   5    1.50    0.95
   3   0   6  283.89   10.11
   3   0   6  278.94   10.17
   3   0   7    0.48    1.12
   3   0   7    0.22    1.03
   3   0   8    4.21    1.27
   3   0   8    4.72    1.26
   3   0   8    3.70    1.31
   3   0   9   -0.29    1.17
   3   0   9   -0.81    1.13
   3   0   9   -0.23    1.18
   3   0   9    0.29    1.23
   3   0  10  172.21    6.39
   3   0  10  148.44    5.97
   3   0  10  155.43    6.59
   3   0  10  165.12    6.68
   3   0  11    0.09    1.24
   3   0  11   -0.19    1.45
   3   0  12  112.01    4.72
   3   0  12  123.45    5.66
   3   0  13   -1.46    1.42
   3   0  15    0.37    1.16
   3   0  16    2.23    1.18
   3   0  17    0.08    1.05
  -3   0 -18    2.50    1.40
   3   0  18    4.39    1.03
  -3   0 -19    0.56    1.17
  -3   0 -20    8.03    1.18
  -3  -1  19    0.05    0.80
  -3   1  19    1.13    0.76
  -3  -1  19    1.46    0.70
  -3  -1  18   22.19    1.50
  -3   1  18   21.18    1.47
  -3  -1  18   24.25    1.47
  -3  -1  17    2.70    0.88
  -3  -1  17    3.97    1.08
  -3   1  17    2.77    1.08
  -3  -1  16   37.68    2.04
  -3  -1  16   40.12    2.22
  -3   1  16   41.93    2.24
  -3  -1  15   14.76    1.34
  -3   1  15   18.19    1.45
  -3   1  14    0.66    0.87
  -3  -1  14    1.72    0.98
  -3   1  14    1.94    1.00
  -3  -1  14   -0.10    1.15
  -3   1  13   14.83    1.28
  -3  -1  13   19.06    1.44
  -3   1  13   19.21    1.47
  -3  -1  13   13.36    1.56
  -3  -1  12    4.86    1.02
  -3   1  12    7.06    1.10
  -3  -1  12    7.91    1.38
   3   1 -12   10.02    1.95
  -3  -1  11    1.36    0.79
  -3   1  11   -0.78    0.88
  -3  -1  11    0.09    1.05
   3   1 -11    1.93    1.43
  -3   1  10   37.31    1.92
  -3  -1  10   43.31    2.15
  -3  -1  10   37.29    1.91
   3   1 -10   39.25    2.66
   3  -1 -10   35.97    2.60
  -3  -1   9   32.88    1.73
  -3   1   9   33.02    1.71
  -3  -1   9   37.47    1.96
   3   1  -9   33.15    2.36
   3  -1  -9   34.67    2.39
   3   1  -8   92.18    4.06
   3  -1  -8   89.69    4.11
   3   1  -7   37.93    2.18
   3  -1  -7   35.36    2.25
  -3  -1   6   59.62    2.82
   3   1  -6   68.80    2.97
  -3  -1   5    0.76    0.81
   3   1  -5    1.59    0.91
  -3  -1   4    4.68    1.06
  -3   1   4    3.65    0.97
   3   1  -4    5.53    1.00
  -3  -1   3   84.71    3.72
  -3   1   3   86.43    3.53
   3   1  -3   89.73    3.47
  -3   1   2  235.47    8.21
   3   1  -2  229.59    8.09
   3   1  -1   10.59    1.39
  -3  -1   1   10.66    1.34
  -3   1   1    7.89    0.94
   3   1   0    1.77    1.00
  -3  -1   0    0.66    0.95
  -3   1   0    0.06    0.67
  -3  -1  -1    8.56    1.27
  -3  -1  -2  246.77    9.08
  -3  -1  -3   89.20    3.99
  -3  -1  -4    6.98    1.40
  -3  -1  -5    0.76    1.12
   3  -1   5    1.77    1.01
   3   1   6   64.95    3.16
   3  -1   6   65.54    3.09
   3   1   7   35.47    2.37
   3  -1   7   42.25    2.37
   3  -1   8   97.92    4.33
   3  -1   8   95.45    4.41
   3   1   8  102.70    4.51
   3  -1   8   93.50    4.29
   3  -1   9   36.99    2.52
   3  -1   9   42.78    2.52
   3  -1   9   37.06    2.52
   3   1   9   41.21    2.72
   3   1   9   33.79    2.01
   3  -1  10   35.24    2.54
   3  -1  10   33.02    2.10
   3  -1  10   38.52    2.51
   3  -1  10   37.36    2.63
   3   1  10   39.23    2.09
   3  -1  11    0.18    1.27
   3  -1  11    0.45    1.24
   3  -1  11   -0.81    1.27
   3   1  11    1.00    1.10
   3  -1  11    0.36    1.39
   3   1  12    4.45    1.25
   3  -1  12    4.41    1.57
   3   1  13   20.12    1.71
   3   1  14    3.00    1.26
   3   1  15   17.12    1.70
   3   1  16   41.32    2.33
   3   1  17    3.75    1.20
  -3   1 -18   19.64    1.86
  -3   1 -19    2.16    1.20
  -3  -2  19    0.59    0.65
   3   2 -19    0.76    0.84
   3   2 -18   18.74    1.46
  -3  -2  17    6.39    0.91
   3   2 -17    6.71    1.29
  -3  -2  16   37.11    1.95
  -3   2  16   43.01    2.05
   3   2 -16   35.75    2.30
  -3   2  15    0.54    0.90
  -3  -2  15   -0.89    0.92
  -3  -2  14    4.02    1.02
  -3   2  14    5.48    1.08
  -3  -2  13    8.10    1.12
  -3   2  13    8.50    1.17
  -3  -2  12    9.61    1.16
  -3   2  12    9.27    1.20
  -3  -2  12    7.35    1.39
  -3  -2  11    9.69    1.15
  -3   2  11   10.11    1.14
  -3  -2  11    7.63    1.39
   3   2 -11   10.21    1.86
  -3   2  10   86.55    3.42
  -3  -2  10   78.42    3.59
   3   2 -10   85.90    4.22
  -3  -2  10   81.29    3.36
  -3  -2   9   44.13    2.12
  -3   2   9   43.04    2.11
   3   2  -9   39.78    2.18
  -3  -2   9   43.04    2.31
  -3   2   9   45.68    2.61
   3   2  -9   42.02    2.70
  -3  -2   8  152.65    5.64
  -3   2   8  154.07    5.67
  -3  -2   8  162.43    5.82
  -3   2   8  152.62    6.20
   3   2  -8  156.42    5.83
   3   2  -8  152.68    6.26
  -3   2   7   53.83    2.80
   3   2  -7   51.18    2.78
  -3   2   6   22.51    1.66
   3   2  -6   17.62    1.59
  -3   2   5  107.02    4.50
   3   2  -5  111.92    4.45
  -3  -2   4  178.67    6.87
  -3  -2   3   73.27    3.40
  -3  -2   2   39.64    2.32
   3   2  -1  133.06    5.45
  -3  -2   1  134.10    5.39
   3   2   0    2.63    1.18
   3   2   1  134.97    5.36
  -3  -2  -1  127.32    5.29
   3   2   2   50.33    2.70
  -3  -2  -2   48.62    2.68
   3   2   3   76.91    3.58
  -3  -2  -3   73.92    3.56
   3   2   4  176.42    6.99
  -3  -2  -4  182.49    7.08
   3   2   5  110.89    4.88
  -3  -2  -5  117.93    5.04
   3   2   6   18.78    1.73
  -3  -2  -6   18.53    1.91
   3  -2   7   53.74    2.89
   3   2   7   52.98    3.03
  -3   2  -8  164.31    6.01
   3  -2   8  172.39    6.44
   3   2   8  155.22    6.57
   3  -2   8  174.34    6.59
   3   2   8  160.53    6.61
   3   2   8  147.48    5.89
  -3   2  -8  145.14    6.07
   3  -2   9   45.01    2.69
   3   2   9   43.03    2.92
  -3   2  -9   40.64    2.31
   3  -2   9   38.13    2.71
   3   2   9   37.49    2.22
   3  -2  10  102.14    4.47
   3   2  10   88.31    4.69
   3  -2  10   92.78    4.59
   3   2  10   89.59    3.90
   3   2  11    8.86    1.90
   3  -2  11   15.04    2.02
   3   2  11   12.08    1.47
   3  -2  11    9.83    1.81
   3   2  12    7.71    1.42
   3   2  13    6.93    1.40
   3   2  14    4.98    1.34
  -3   2 -15    0.96    1.40
   3   2  15    0.76    1.18
  -3   2 -16   31.48    2.27
  -3   2 -17    5.16    1.40
  -3   2 -17    4.81    1.42
  -3   2 -18   14.42    1.54
  -3   2 -18   15.31    1.60
  -3   2 -19   -0.47    1.09
  -3   2 -19    0.65    1.01
  -3  -3  18    2.79    0.71
   3   3 -18    2.86    0.86
   3   3 -17    5.39    1.07
  -3   3  16    0.71    0.75
   3   3 -16    0.26    1.04
  -3  -3  15    0.25    0.78
  -3   3  15    0.41    0.80
   3   3 -15    0.57    1.09
  -3   3  14   10.66    1.15
  -3  -3  14    9.99    1.09
   3   3 -14    9.51    1.40
  -3  -3  13    1.31    0.88
  -3   3  13   -0.08    0.95
   3   3 -13    2.79    1.23
  -3   3  12    4.46    1.06
  -3  -3  12    6.22    1.03
   3   3 -12    7.27    1.30
  -3  -3  11    5.36    1.01
  -3   3  11    2.99    1.02
   3   3 -11    4.84    1.15
  -3  -3  10    0.82    0.90
   3   3 -10    1.30    1.04
  -3   3  10    0.40    0.90
  -3  -3  10    1.77    1.09
  -3  -3   9    7.97    1.05
  -3   3   9    6.98    1.03
   3   3  -9    7.54    1.17
  -3   3   9    6.33    1.41
  -3  -3   8    1.88    0.96
   3   3  -8    1.39    0.94
  -3   3   8    1.10    1.16
  -3   3   8    1.06    0.88
  -3  -3   7    0.35    0.91
  -3   3   7    0.07    0.87
   3   3  -7    0.30    0.82
  -3   3   7    1.04    1.06
   3   3  -7    0.17    1.23
   3   3  -7    0.87    0.88
  -3   3   6    3.73    0.95
  -3  -3   6    2.85    0.99
  -3   3   6    1.80    0.88
   3   3  -6    2.56    0.88
  -3   3   6    1.93    1.09
   3   3  -6    2.22    1.16
   3   3  -6    2.87    0.90
  -3   3   5    4.20    0.97
   3   3  -5    2.94    0.88
  -3   3   5    2.32    1.04
   3   3  -5    3.22    1.21
   3   3  -5    4.51    0.98
  -3   3   5    3.95    0.95
  -3   3   4   67.87    2.85
  -3   3   4   65.61    2.87
   3   3  -4   69.37    2.81
  -3   3   4   68.01    3.23
   3   3  -4   66.43    2.82
  -3  -3   3   41.88    2.46
  -3   3   3   36.85    2.18
  -3  -3   2   78.06    3.74
  -3  -3   1    2.87    1.19
  -3  -3   0    1.78    1.12
  -3  -3  -1    1.35    1.18
   3   3   2   81.73    3.96
   3   3   3   42.20    2.59
  -3   3  -4   66.05    3.10
  -3   3  -4   67.60    3.04
   3   3   4   59.13    2.92
   3   3   4   64.63    3.39
  -3   3  -4   70.59    2.95
  -3   3  -5    3.85    1.19
   3   3   5    2.73    1.24
  -3   3  -5    3.47    1.04
  -3   3  -5    1.79    1.41
  -3   3  -6    3.87    1.50
  -3   3  -6    4.83    1.28
   3   3   6    5.82    1.44
  -3   3  -6    2.52    0.99
  -3   3  -7    0.52    1.39
  -3   3  -7    1.44    1.20
   3   3   7    0.16    1.20
  -3   3  -8    2.58    1.47
  -3   3  -8    1.59    1.13
  -3   3  -9   10.93    1.72
  -3   3  -9    6.53    1.43
   3  -3   9    7.91    1.71
  -3   3 -10    5.28    1.68
  -3   3 -10    0.22    1.16
  -3   3 -11    3.29    1.55
  -3   3 -11    4.82    1.34
  -3   3 -12    9.40    1.72
  -3   3 -12    8.50    1.44
  -3   3 -13    0.11    1.45
  -3   3 -13   -0.22    1.19
  -3   3 -14   10.50    1.68
  -3   3 -14    9.62    1.42
  -3   3 -15    1.84    1.40
  -3   3 -16    0.56    1.27
  -3   3 -17    4.93    1.29
   3   3  18    2.11    0.71
  -3   3 -18    1.87    1.09
   3   4 -16    3.46    0.85
  -3   4  15    5.34    0.78
   3   4 -15    6.35    1.02
  -3   4  14    1.43    0.77
  -3  -4  14    2.19    0.80
   3   4 -14    1.27    0.95
  -3   4  13   46.87    2.16
   3   4 -13   40.92    2.25
  -3   4  12   12.81    1.21
   3   4 -12   13.62    1.38
  -3   4  11    2.65    0.91
   3   4 -11    2.02    1.06
  -3   4  10    2.66    0.99
  -3   4   9   55.15    2.60
  -3   4   8   45.85    2.31
  -3   4   7    5.21    1.10
  -3  -4   6   13.39    1.30
  -3   4   6   11.64    1.23
   3   4  -6    9.68    1.21
   3   4  -6   11.25    1.64
  -3  -4   5   64.93    2.93
  -3   4   5   66.43    3.03
   3   4  -5   73.16    3.00
  -3   4   5   61.93    3.48
   3   4  -5   68.74    3.68
  -3   4   4   44.50    2.26
   3   4  -4   43.88    2.18
   3   4  -4   42.46    2.75
  -3   4   3    9.33    1.06
   3   4  -3    7.71    1.44
  -3   4   3   10.34    1.20
   3   4  -3   10.32    1.53
  -3   4   2    2.09    0.86
   3   4  -2    1.14    1.16
   3   4  -2    0.92    1.01
  -3   4   2    1.92    1.14
   3   4  -1    7.57    1.35
  -3   4   1    7.03    1.34
  -3   4   0   -1.38    1.15
   3   4   1    9.86    1.36
  -3   4  -1    7.33    1.37
   3   4   2    0.09    1.13
  -3   4  -2    0.45    1.01
  -3   4  -2    2.18    1.26
   3   4   3    8.63    1.35
  -3   4  -3    8.13    1.22
  -3   4  -3    6.84    1.39
  -3   4  -4   43.51    2.53
   3   4   4   44.25    2.41
  -3   4  -4   47.38    2.43
  -3   4  -5   83.94    3.89
  -3   4  -5   86.10    3.74
   3   4   5   78.21    3.60
  -3   4  -5   78.56    3.59
  -3   4  -6   10.62    1.79
  -3   4  -6   13.11    1.60
   3   4   6   13.36    1.47
  -3   4  -6    9.96    1.41
  -3   4  -7    1.07    1.59
  -3   4  -7    3.20    1.36
   3   4   7    4.68    1.26
  -3   4  -7    0.90    1.17
  -3   4  -8   44.05    2.86
  -3   4  -8   51.84    2.75
   3   4   8   45.53    2.54
  -3   4  -8   53.71    2.64
  -3   4  -9   53.29    3.00
  -3   4  -9   50.91    2.88
   3   4   9   52.91    2.74
  -3   4  -9   49.56    2.61
  -3   4 -10    2.80    1.57
  -3   4 -10    2.27    1.26
   3   4  10    2.94    1.17
  -3   4 -11    1.91    1.50
  -3   4 -11    5.20    1.35
   3   4  11    2.09    1.14
  -3   4 -12   10.12    1.67
  -3   4 -12   13.78    1.58
   3   4  12   12.76    1.44
  -3   4 -13   43.58    2.61
  -3   4 -13   47.96    2.54
   3   4  13   47.36    2.40
  -3   4 -14    0.18    1.23
  -3   4 -14    1.19    1.10
  -3   4 -15    4.10    1.21
   3  -4  16    2.93    0.66
  -3   4 -16    2.80    1.05
   3   5 -14    4.68    0.87
  -3  -5  14    5.22    0.69
   3   5 -13    6.16    1.00
  -3  -5  13    3.95    0.77
   3   5 -12    3.62    1.10
  -3  -5  12    3.14    0.86
   3   5 -11    2.25    1.13
  -3   5  11    0.59    0.69
   3   5 -10    3.69    1.27
  -3   5  10    1.70    0.75
   3   5  -9   20.76    1.78
  -3   5   9   16.01    1.28
   3   5  -8   16.35    1.79
  -3   5   8   19.41    1.41
   3   5  -7    4.92    1.51
  -3   5   7    6.74    1.06
   3   5  -6   58.33    3.05
  -3   5   6   58.56    2.70
   3   5  -5    6.22    1.52
  -3   5   5    7.35    1.18
   3   5  -4    1.43    1.29
  -3   5   4    1.05    1.01
   3   5  -3   74.99    3.57
  -3   5   3   75.79    3.33
   3   5  -2   90.88    4.02
  -3   5   2   91.16    3.83
   3   5  -1   11.14    1.59
  -3   5   1   12.16    1.38
   3   5   0    0.10    1.19
  -3   5   0   -0.82    1.26
   3   5   1   10.58    1.49
  -3   5  -1    8.46    1.53
  -3   5  -2   93.67    4.14
  -3   5  -3   88.13    4.01
  -3   5  -4    1.44    1.16
  -3   5  -4    1.31    1.36
  -3   5  -5    8.93    1.34
  -3   5  -5    8.92    1.59
  -3   5  -6   56.85    2.75
  -3   5  -6   49.55    2.84
  -3   5  -7    8.24    1.25
  -3   5  -7    6.96    1.45
  -3   5  -8   15.66    1.46
  -3   5  -8   15.55    1.67
  -3   5  -9   18.49    1.65
  -3   5  -9   20.82    1.57
  -3   5  -9   19.38    1.76
  -3   5 -10    3.19    0.97
  -3   5 -11    0.07    0.82
  -3   5 -12    2.31    0.86
  -3   5 -12    2.65    1.05
  -3   5 -13    5.60    0.99
  -3   5 -14    5.60    0.93
   3   6 -11    0.76    0.68
  -3  -6  11    0.72    0.51
   3   6 -10    2.22    0.83
  -3  -6  10    3.06    0.63
   3   6  -9   -0.20    0.86
   3   6  -8    8.79    1.16
   3   6  -7    5.92    1.19
  -3   6   7    5.96    0.82
  -3   6   6   -0.30    0.68
   3   6  -6   -0.08    1.08
   3   6  -5    2.36    1.12
  -3   6   5    3.53    0.82
   3   6  -4    4.58    1.17
  -3   6   4    4.60    0.87
   3   6  -3    0.73    1.12
  -3   6   3    1.11    0.84
  -3   6   2    0.93    0.89
   3   6  -2    1.18    1.04
   3   6  -1    1.89    1.09
  -3   6   1    1.04    0.88
   3   6   0    0.18    1.02
  -3   6   0    0.41    0.95
   3   6   1    0.34    0.98
  -3   6  -1    1.60    0.94
   3   6   2    1.33    0.95
   3   6   3    0.55    0.93
  -3   6  -3   -0.18    1.14
  -3   6  -4    4.38    1.20
  -3   6  -5    3.29    1.12
  -3   6  -6    2.13    1.08
  -3   6  -7    4.51    1.12
  -3   6  -8    9.25    1.16
  -3   6  -9    1.12    0.84
  -3   6 -10    3.93    0.85
  -3   6 -11    0.14    0.66
   3   7  -5    1.18    0.64
   3   7  -4    7.20    0.80
   3   7  -3    1.24    0.69
   3   7  -2    2.24    0.71
  -3   7   1    3.03    0.63
   3   7  -1    2.73    0.72
   3   7   0    0.46    0.64
  -3   7   0    0.14    0.57
  -3   7  -1    2.20    0.63
   3   7   1    3.27    0.71
   3   7   2    0.57    0.61
  -3   7  -2    1.23    0.61
   3   7   3    2.08    0.62
  -3   7  -3    0.40    0.61
  -3   7  -4    3.70    0.63
  -3   7  -5    0.50    0.50
  -4   0  19    0.38    0.65
  -4   0  18    4.95    0.93
  -4   0  17    0.76    0.98
  -4   0  16   55.76    2.43
  -4   0  15   -0.47    0.80
  -4   0  14  391.67   13.19
  -4   0  14  372.72   13.36
  -4   0  13    2.16    0.91
  -4   0  13    3.02    1.00
  -4   0  13    2.26    1.20
  -4   0  12   15.38    1.29
  -4   0  12   15.91    1.47
  -4   0  11    0.76    1.00
  -4   0  10   48.51    2.31
   4   0 -10   37.28    2.86
  -4   0   9    0.44    0.89
   4   0  -9    1.27    1.31
  -4   0   8    3.87    0.99
   4   0  -8    5.78    1.37
  -4   0   7    1.69    0.94
  -4   0   7    1.00    1.02
   4   0  -7    2.50    1.34
  -4   0   6  284.58   10.36
   4   0  -6  290.98   10.48
  -4   0   5    2.17    1.09
   4   0  -5    5.38    1.35
  -4   0   4  632.00   21.62
   4   0  -4  638.52   21.63
  -4   0   3    2.31    1.04
  -4   0   2   46.18    2.37
  -4   0   1    1.33    0.92
  -4   0   0   16.22    1.56
  -4   0  -1   -0.13    1.12
   4   0   2   46.74    2.64
  -4   0  -2   49.54    2.80
   4   0   3    0.85    1.18
  -4   0  -3    1.80    1.27
  -4   0  -4  651.36   22.84
   4   0   4  667.25   22.69
   4   0   5    3.57    1.43
  -4   0  -5    2.97    1.56
   4   0   6  299.77   11.11
  -4   0  -7    1.01    1.27
   4   0   7    1.44    1.36
   4   0   8    6.41    1.49
   4   0   8    5.57    1.44
  -4   0  -8    4.30    1.46
  -4   0  -9   -0.57    1.38
   4   0   9    2.63    1.39
   4   0  10   46.24    3.18
   4   0  10   50.77    3.29
  -4   0 -10   43.38    2.75
  -4   0 -11    0.12    1.44
  -4   0 -12    9.60    1.76
  -4   0 -13    1.75    1.53
  -4   0 -14  379.74   13.54
  -4   0 -15    1.66    1.37
  -4   0 -16   48.65    2.75
  -4   0 -17    0.59    1.18
  -4   0 -18    3.80    1.19
  -4  -1  18    5.78    0.86
  -4   1  18    3.42    0.82
   4   1 -18    3.94    0.98
  -4  -1  17    5.77    0.87
  -4  -1  17    7.15    1.09
  -4   1  17    6.28    1.02
  -4  -1  16   34.89    1.91
  -4   1  16   37.58    1.93
  -4  -1  15   19.77    1.40
  -4   1  15   21.04    1.44
  -4  -1  14    2.53    0.96
  -4   1  14    4.92    1.03
  -4  -1  14    1.39    1.15
  -4  -1  13    2.27    0.92
  -4   1  13    1.32    0.93
  -4  -1  13    1.41    1.11
  -4  -1  12   10.00    1.13
  -4   1  12   11.44    1.20
  -4  -1  12   11.09    1.45
  -4  -1  11    2.24    0.88
  -4   1  11    0.67    0.88
  -4  -1  11    1.98    1.09
  -4  -1  10   24.26    1.52
  -4   1  10   20.86    1.51
  -4  -1  10   26.60    1.72
   4   1 -10   20.11    2.16
   4  -1 -10   25.22    2.32
  -4  -1   9    1.77    0.81
  -4  -1   9    0.32    0.94
  -4   1   9    0.29    0.88
   4  -1  -9    0.17    1.31
   4   1  -9   -0.16    1.27
  -4  -1   8  100.73    3.82
  -4  -1   8   98.67    3.94
  -4   1   8  103.26    3.90
   4   1  -8   91.18    4.40
   4  -1  -8   89.26    4.52
  -4  -1   7    4.36    0.85
  -4  -1   7    3.44    0.94
  -4   1   7    6.26    1.02
   4   1  -7    5.98    1.33
   4  -1  -7    6.63    1.39
  -4  -1   6  165.89    6.92
   4   1  -6  179.49    7.01
  -4  -1   5   12.45    1.48
  -4  -1   5   13.09    1.42
   4   1  -5   15.81    1.50
  -4  -1   4   75.66    3.55
  -4   1   4   73.56    3.37
  -4  -1   3   84.00    3.93
  -4   1   3   87.31    3.73
  -4  -1   2  100.47    4.21
  -4   1   2   89.23    3.86
  -4  -1   1   57.02    3.00
  -4   1   1   54.70    2.60
  -4  -1   0    1.57    1.16
  -4   1   0    0.57    0.77
   4   1   1   60.56    3.16
  -4  -1  -1   61.80    3.21
  -4  -1  -2  107.44    4.78
  -4  -1  -3   99.78    4.63
   4  -1   4   85.49    3.91
  -4  -1  -4   82.55    4.18
   4  -1   5   17.33    1.78
  -4  -1  -5   15.16    1.90
   4  -1   6  186.96    7.48
   4  -1   6  191.29    6.80
  -4   1  -6  186.49    7.20
  -4  -1  -6  200.30    7.90
  -4   1  -7    6.90    1.58
   4  -1   7    3.94    1.46
  -4  -1  -7    3.34    1.48
   4  -1   8  102.37    4.89
   4  -1   8  113.10    4.83
  -4  -1  -8  104.07    5.20
   4  -1   8  108.54    4.92
  -4   1  -8   98.61    4.55
  -4   1  -9    0.73    1.52
   4  -1   9   -0.94    1.40
   4  -1   9    0.64    1.39
  -4  -1  -9    0.22    1.46
   4  -1   9    2.34    1.48
  -4   1 -10   17.78    2.08
   4  -1  10   24.55    2.33
   4  -1  10   21.63    2.11
  -4  -1 -10   24.80    2.59
   4  -1  10   25.98    2.48
  -4   1 -11    2.68    1.57
   4   1  11    0.55    1.20
  -4   1 -12    8.89    1.72
  -4   1 -13    1.28    1.57
  -4   1 -14    2.62    1.53
  -4   1 -15   17.63    1.93
  -4   1 -16   30.24    2.18
  -4   1 -17    6.52    1.39
  -4   1 -18    4.53    1.20
  -4  -2  18    2.51    0.63
   4   2 -18    0.85    0.79
  -4  -2  17   10.29    0.94
   4   2 -17   11.36    1.22
  -4  -2  16   34.18    1.77
  -4   2  16   38.27    1.81
   4   2 -16   34.81    2.05
  -4  -2  15    3.26    0.89
  -4   2  15    1.83    0.88
  -4  -2  14    3.48    0.94
  -4   2  14    4.52    1.03
  -4  -2  13    3.06    1.01
  -4   2  13    4.91    1.04
  -4  -2  13    1.84    1.19
  -4  -2  12   12.37    1.24
  -4   2  12   11.83    1.21
  -4  -2  11    7.38    1.13
  -4   2  11    5.88    1.10
   4   2 -11    6.40    1.21
  -4  -2  11    4.27    1.29
  -4  -2  10  327.20   11.04
  -4   2  10  312.49   11.01
   4   2 -10  317.43   11.16
  -4  -2  10  305.95   11.17
  -4  -2   9   27.76    1.69
  -4   2   9   24.74    1.59
   4   2  -9   25.55    1.73
  -4  -2   9   31.76    1.92
   4   2  -9   26.24    2.28
   4  -2  -9   27.97    2.51
  -4  -2   8  144.61    5.21
  -4   2   8  138.24    5.15
  -4  -2   8  141.73    5.29
  -4   2   8  140.70    5.84
   4   2  -8  133.89    5.33
   4   2  -8  127.90    5.78
   4  -2  -8  128.57    6.00
  -4  -2   7   13.63    1.24
  -4   2   7   10.70    1.11
  -4   2   7   12.28    1.58
   4   2  -7    9.57    1.26
  -4   2   6   60.83    2.57
  -4   2   6   54.12    2.47
  -4  -2   6   56.13    2.53
  -4   2   6   55.31    2.96
   4   2  -6   54.64    2.57
  -4   2   5   41.99    2.02
  -4  -2   5   39.44    2.55
  -4  -2   5   39.64    2.03
   4   2  -5   42.09    2.06
  -4  -2   4    8.33    1.38
  -4   2   4    7.33    1.08
   4   2  -4   10.45    1.03
  -4  -2   3   33.96    2.39
  -4  -2   2  338.11   12.36
  -4  -2   1  433.74   15.49
   4   2   0 3073.76  101.46
   4   2   1  403.17   14.48
  -4  -2  -1  401.50   14.53
   4   2   2  342.16   12.39
  -4  -2  -2  329.50   12.41
   4   2   3   34.79    2.58
  -4  -2  -3   36.34    2.65
  -4   2  -4    7.73    1.31
   4   2   4    9.36    1.29
   4   2   4    6.65    1.58
  -4  -2  -4    9.76    1.70
  -4   2  -4    5.79    1.40
   4  -2   5   44.36    2.77
   4   2   5   51.54    3.10
  -4  -2  -5   52.52    3.15
  -4   2  -5   52.43    2.64
  -4   2  -6   55.34    2.99
   4  -2   6   60.58    3.34
   4   2   6   57.67    3.43
  -4  -2  -6   63.20    3.69
  -4   2  -7   13.48    1.79
   4  -2   7   13.05    1.89
   4   2   7   15.13    2.02
  -4  -2  -7   13.77    2.06
   4  -2   7   13.90    1.83
   4  -2   8  136.08    6.18
  -4   2  -8  143.56    5.59
   4  -2   8  156.47    6.18
   4   2   8  135.65    6.31
   4  -2   8  146.19    6.28
  -4   2  -8  134.69    5.77
   4  -2   9   28.18    2.59
  -4   2  -9   28.67    2.05
   4   2   9   33.31    2.67
   4  -2   9   26.05    2.46
  -4   2  -9   31.49    2.35
  -4   2 -10  299.19   10.98
  -4   2 -11    7.32    1.70
  -4   2 -12   10.11    1.70
  -4   2 -13    5.46    1.59
  -4   2 -14    3.35    1.43
  -4   2 -15    1.50    1.29
  -4   2 -16   32.29    2.10
  -4   2 -17    9.19    1.33
  -4   2 -18    2.25    0.97
   4   2  18    2.09    0.74
  -4  -3  17    1.05    0.49
   4   3 -17    0.89    0.69
  -4  -3  16    9.76    0.88
  -4   3  16   10.65    0.91
   4   3 -16   11.96    1.13
  -4  -3  15    1.19    0.72
  -4   3  15    1.74    0.77
   4   3 -15    1.22    0.93
  -4  -3  14    3.25    0.83
  -4   3  14    5.80    0.97
   4   3 -14    3.57    1.13
  -4  -3  13    4.82    0.95
  -4   3  13    6.21    1.05
   4   3 -13    5.27    1.13
  -4  -3  12   35.96    1.86
  -4   3  12   30.00    1.84
   4   3 -12   30.09    1.95
   4   3 -12   33.56    2.04
  -4  -3  11   12.94    1.22
  -4   3  11   11.68    1.23
   4   3 -11   11.64    1.31
  -4  -3  10    3.79    1.05
  -4   3  10    3.62    1.04
   4   3 -10    3.74    1.16
  -4  -3   9    1.92    0.96
  -4   3   9    0.72    0.91
   4   3  -9    1.73    1.00
  -4   3   8    3.34    1.01
   4   3  -8    2.19    0.99
  -4  -3   8    5.04    1.11
   4   3  -8    3.93    1.07
  -4  -3   7   43.00    2.22
  -4   3   7   47.64    2.25
   4   3  -7   44.39    2.27
   4   3  -7   42.81    2.91
   4   3  -7   41.90    2.33
  -4  -3   6    4.27    1.05
  -4   3   6    4.13    0.98
  -4   3   6    6.40    1.02
   4   3  -6    5.73    1.04
  -4   3   6    6.21    1.33
   4   3  -6    3.49    0.97
  -4  -3   5   12.60    1.30
  -4   3   5   15.65    1.28
  -4   3   5   13.23    1.26
   4   3  -5   15.47    1.29
  -4   3   5   11.10    1.46
   4   3  -5   14.67    1.26
  -4   3   4   33.72    1.83
  -4   3   4   30.23    1.76
   4   3  -4   32.63    1.78
  -4   3   4   31.36    2.18
   4   3  -4   31.09    1.75
  -4   3   3   13.43    1.25
  -4  -3   3   11.59    1.62
  -4   3   3    9.11    1.10
   4   3  -3   10.18    1.08
  -4   3   2    1.35    0.94
  -4  -3   2    1.52    1.26
  -4   3   2    1.69    0.86
   4   3  -2    2.01    0.78
  -4   3   1    9.67    1.15
  -4  -3   1    7.94    1.53
  -4   3   0  113.80    4.40
   4   3   0  116.63    4.67
  -4   3  -1   10.13    1.25
   4   3   1    8.71    1.43
   4   3   1    9.14    1.72
  -4  -3  -1    8.28    1.54
  -4   3  -2    2.10    1.15
  -4  -3  -2    2.62    1.35
   4   3   2    1.97    1.26
   4   3   2    1.25    1.37
  -4   3  -3    8.83    1.31
   4   3   3    8.56    1.42
   4   3   3   11.00    1.78
   4   3   4   30.29    2.02
   4   3   4   28.25    2.40
   4   3   5   11.61    1.46
   4   3   5   11.49    1.79
   4   3   6    5.56    1.32
   4   3   6    6.41    1.57
   4   3   7   43.54    2.54
   4   3   7   41.60    3.07
  -4   3  -8    2.61    1.65
  -4   3  -9    3.07    1.52
  -4   3 -10    3.49    1.51
  -4   3 -11    9.30    1.64
  -4   3 -12   33.51    2.30
  -4   3 -13    4.33    1.46
  -4   3 -14    3.07    1.32
   4  -3  14    3.87    0.92
  -4   3 -15    1.05    1.15
   4   3  15    2.60    1.00
  -4   3 -16   10.15    1.27
   4   3  16   10.09    1.10
   4   3  17    1.31    0.68
  -4   4  15   28.63    1.35
  -4   4  14   58.47    2.32
  -4  -4  14   52.54    2.26
  -4  -4  13   19.05    1.18
  -4   4  13   18.37    1.25
  -4  -4  12    1.23    0.76
  -4   4  12    1.97    0.80
  -4  -4  11   13.58    1.15
  -4   4  11   12.63    1.19
  -4  -4  10    3.48    0.91
  -4   4  10    4.08    0.93
  -4  -4   9    0.89    0.86
  -4   4   9    1.50    0.95
  -4  -4   8    0.15    0.89
  -4   4   8   -0.08    0.86
   4   4  -8   -0.78    0.91
  -4  -4   7    3.74    1.05
  -4   4   7    3.50    1.01
   4   4  -7    2.15    0.98
  -4  -4   6  115.28    4.52
  -4   4   6  112.73    4.51
   4   4  -6  115.41    4.54
  -4  -4   5    5.22    1.13
   4   4  -5    3.24    1.01
  -4   4   4  336.89   11.39
  -4   4   4  321.88   11.44
   4   4  -4  320.81   11.39
  -4   4   3   93.32    3.74
  -4   4   3   92.70    3.83
   4   4  -3   85.37    3.68
  -4   4   2   14.58    1.35
  -4   4   2   15.68    1.42
  -4   4   1    5.82    1.08
  -4   4   1    5.53    1.13
  -4   4   0    4.66    0.99
  -4   4   0    2.94    1.24
  -4   4  -1    4.69    1.37
   4   4   2   14.95    1.73
  -4   4  -2   13.86    1.71
   4   4   3   84.00    3.86
  -4   4  -3   78.60    3.76
   4   4   4  336.56   12.04
  -4   4  -4  340.36   12.09
   4   4   5    3.44    1.33
  -4   4  -5    5.01    1.50
   4   4   6  117.40    4.96
  -4   4  -6  123.30    4.87
   4   4   7    4.35    1.29
  -4   4  -7    3.43    1.08
  -4   4  -8   -0.23    1.49
   4   4   8    1.56    1.14
  -4   4  -9    0.11    1.43
   4   4   9   -0.20    1.14
  -4   4 -10    2.54    1.38
   4   4  10    4.53    1.23
  -4   4 -11    9.07    1.51
   4   4  11    8.58    1.28
  -4   4 -12    0.99    1.24
   4   4  12    2.56    1.04
   4  -4  13   24.50    1.41
   4   4  13   22.05    1.53
   4  -4  14   59.99    2.49
   4   4  14   59.63    2.58
   4  -4  15   28.12    1.38
   4   4  15   25.79    1.44
   4   5 -13   12.09    1.06
  -4   5  13   12.67    0.82
  -4  -5  13   13.26    0.86
   4   5 -12    8.00    1.03
  -4   5  12    5.72    0.71
  -4  -5  12    7.43    0.80
   4   5 -11    9.85    1.19
  -4   5  11    7.32    0.83
   4   5 -10    2.67    1.06
  -4   5  10    4.97    0.78
   4   5  -9    0.51    1.08
  -4   5   9    1.25    0.75
   4   5  -8    2.65    1.19
  -4   5   8    2.90    0.85
   4   5  -7   23.58    1.82
  -4   5   7   23.85    1.50
  -4  -5   6    1.03    0.80
   4   5  -6    2.47    1.25
  -4   5   6    3.20    0.89
  -4  -5   5    2.33    0.91
   4   5  -5    1.91    1.24
  -4   5   5    2.48    0.92
  -4  -5   4   20.41    1.44
  -4   5   4   19.52    1.51
  -4   5   3    4.20    1.02
  -4   5   2   54.49    2.65
  -4   5   1    4.68    1.13
  -4   5   0   -0.09    0.99
  -4   5  -1    3.91    1.14
  -4   5  -1    3.99    1.35
  -4   5  -2   54.57    2.86
  -4   5  -3    3.88    1.32
  -4   5  -4   21.57    1.83
  -4   5  -5    2.37    1.27
  -4   5  -6    0.30    1.21
  -4   5  -7   30.16    2.03
  -4   5  -8    4.49    1.26
  -4   5  -9    1.49    1.07
   4  -5  10    6.08    0.85
  -4   5 -10    3.44    1.03
   4  -5  11    7.09    0.85
  -4   5 -11    9.94    1.15
   4  -5  12    6.90    0.78
  -4   5 -12    5.17    0.95
   4  -5  13   12.49    0.87
  -4   5 -13    8.87    0.99
   4   6  -9    1.03    0.69
  -4   6   9    1.14    0.49
   4   6  -8   13.38    1.09
  -4   6   8   13.23    0.88
   4   6  -7    4.11    0.90
  -4   6   7    5.40    0.70
   4   6  -6    1.03    0.85
  -4   6   6    1.83    0.66
   4   6  -5    4.01    0.94
  -4   6   5    4.88    0.77
   4   6  -4   12.95    1.24
  -4   6   4   11.40    1.01
  -4   6   3    0.25    0.74
  -4   6   2    3.33    0.86
  -4   6   1   30.54    1.68
  -4   6   0    5.45    0.95
  -4   6  -1   27.22    1.61
  -4   6  -2    4.06    0.93
  -4   6  -3   -0.21    0.80
  -4   6  -4    9.04    1.03
  -4   6  -5    3.97    0.84
  -4   6  -5    4.25    1.05
  -4   6  -6    2.85    0.76
  -4   6  -6    2.97    0.96
  -4   6  -7    3.20    0.74
  -4   6  -7    3.49    0.92
  -4   6  -8    6.39    0.79
  -4   6  -8   14.01    1.04
  -4   6  -9    0.93    0.54
  -4   6  -9    0.83    0.69
  -5   0  17   -0.90    0.77
  -5   0  16    6.81    1.05
  -5   0  15    0.15    0.89
  -5   0  14    8.47    1.21
  -5   0  13   -0.80    1.01
  -5   0  12   28.25    1.84
  -5   0  11   -1.16    1.00
  -5   0  10   70.46    3.14
  -5   0   9    0.17    0.95
  -5   0   8   67.51    2.96
   5   0  -8   60.70    3.54
  -5   0   7   -0.23    0.89
  -5   0   7   -0.29    1.07
   5   0  -7   -0.16    1.26
   5   0  -6    0.91    1.24
  -5   0   6    2.03    0.94
  -5   0   6    0.98    1.10
  -5   0   5   -0.28    1.09
   5   0  -5   -0.99    1.19
  -5   0   4   24.70    1.97
   5   0  -4   20.35    1.46
  -5   0   3    1.31    1.07
   5   0  -3    0.89    0.83
  -5   0   2   28.75    2.10
   5   0  -2   33.49    1.78
   5   0  -1   -0.16    0.95
  -5   0   1   -0.37    1.02
   5   0  -1   -0.36    0.75
   5   0   0   -0.71    0.97
  -5   0   0    0.47    1.02
  -5   0   0    0.72    1.12
  -5   0  -1   -0.27    1.10
   5   0   1   -0.32    0.94
   5   0   2   37.18    2.00
  -5   0  -2   35.58    2.13
  -5   0  -3    1.74    1.14
  -5   0  -3    0.73    1.32
   5   0   3    0.24    0.91
   5   0   4   21.83    1.61
   5   0   4   27.62    1.71
  -5   0  -4   24.51    2.34
  -5   0  -4   23.82    1.92
   5   0   5    0.85    0.95
  -5   0  -5    1.29    1.28
  -5   0  -5   -0.83    1.35
   5   0   5    0.08    0.97
  -5   0  -6    2.03    1.45
   5   0   6    1.56    0.96
  -5   0  -6    3.04    1.59
   5   0   6    2.83    1.08
  -5   0  -7    1.30    1.43
   5   0   7    0.39    0.95
  -5   0  -7   -0.91    1.41
  -5   0  -8   54.51    3.69
  -5   0  -8   57.66    3.21
  -5   0  -9    0.63    1.49
  -5   0 -10   60.62    3.28
  -5   0 -11    0.13    1.35
  -5   0 -12   24.59    2.07
  -5   0 -13    0.46    1.33
  -5   0 -14    7.98    1.45
  -5   0 -15    0.38    1.15
  -5   0 -16    4.72    1.16
  -5   0 -17   -0.27    0.89
  -5  -1  17    2.36    0.72
  -5   1  17    2.22    0.70
   5   1 -17    3.33    0.85
  -5  -1  16    3.26    0.71
  -5  -1  16    6.15    0.93
  -5   1  16    4.83    0.92
  -5  -1  15    1.41    0.71
  -5  -1  15    0.07    0.89
  -5  -1  14   11.51    1.08
  -5  -1  14    7.32    1.22
  -5  -1  13   -0.07    0.76
  -5  -1  13   -0.09    1.05
  -5  -1  12   18.02    1.31
  -5  -1  12   17.03    1.57
  -5  -1  11    5.93    0.96
  -5  -1  11    9.18    1.35
  -5   1  11    8.84    1.20
  -5  -1  10   80.19    3.41
  -5  -1  10   87.27    3.65
  -5   1  10   87.41    3.60
  -5  -1   9    1.38    1.06
  -5   1   9    0.41    0.94
  -5  -1   8    5.97    1.07
  -5   1   8    5.91    1.12
  -5  -1   7   45.59    2.18
  -5   1   7   41.04    2.15
  -5  -1   7   37.39    2.56
   5   1  -7   38.03    2.12
   5  -1  -7   38.00    2.77
  -5  -1   6   -0.30    0.88
  -5  -1   6    0.72    1.10
   5   1  -6    0.17    0.85
   5  -1  -6   -1.35    1.25
  -5  -1   5    8.00    1.07
  -5  -1   5    7.55    1.49
   5   1  -5    7.92    1.04
   5  -1  -5    6.89    1.46
  -5  -1   4  164.73    6.32
   5   1  -4  148.20    5.70
  -5  -1   3   87.79    4.02
  -5   1   3   83.16    3.85
   5   1  -3   82.74    3.43
  -5  -1   2    4.93    1.43
   5   1  -2    4.04    1.03
  -5   1   2    2.80    1.07
   5   1  -2    2.91    0.90
  -5   1   1   51.45    2.59
   5   1  -1   58.90    2.64
   5   1  -1   53.06    2.42
  -5   1   0    2.54    1.28
  -5   1   0    2.34    1.12
   5   1   0    3.46    1.08
   5  -1   0    3.47    1.04
   5   1   0    2.18    0.83
   5  -1   1   50.31    2.50
  -5   1  -1   49.37    2.62
  -5  -1  -1   50.97    3.16
   5   1   1   55.72    2.57
   5  -1   1   57.25    2.54
  -5   1  -1   50.19    2.71
   5   1   1   56.35    2.40
   5  -1   2    3.93    1.09
  -5   1  -2    3.48    1.17
  -5  -1  -2    4.45    1.49
   5   1   2    3.73    1.07
   5  -1   2    3.12    1.04
  -5   1  -2    4.05    1.33
   5   1   2    4.40    0.84
  -5   1  -3   85.45    4.08
   5  -1   3  100.06    3.94
  -5  -1  -3   92.93    4.75
   5   1   3  104.64    4.01
   5  -1   3   96.03    3.99
  -5   1  -3  100.03    4.24
   5  -1   4  163.54    6.11
  -5  -1  -4  156.31    7.06
   5   1   4  166.82    6.17
   5  -1   4  166.23    6.14
  -5   1  -4  166.21    6.46
  -5   1  -5    9.98    1.64
  -5  -1  -5    9.90    1.93
   5   1   5    7.58    1.22
   5  -1   5    9.14    1.19
   5  -1   5    7.79    1.17
  -5   1  -6    1.10    1.44
   5  -1   6    0.19    1.33
   5  -1   6    0.72    0.92
  -5  -1  -6   -0.94    1.49
   5  -1   6    0.09    0.95
   5  -1   7   39.07    2.19
   5  -1   7   39.94    2.96
  -5  -1  -7   44.47    3.38
   5  -1   7   44.05    2.30
  -5   1  -7   41.27    2.75
  -5   1  -8   10.21    1.79
   5  -1   8    5.19    1.16
  -5   1  -9    0.67    1.56
   5  -1   9    0.33    0.91
   5  -1  10   82.99    3.55
  -5   1 -10   82.96    4.05
  -5   1 -11   11.21    1.75
  -5   1 -12   14.21    1.80
  -5   1 -13    2.57    1.41
  -5   1 -14    8.88    1.52
  -5   1 -15    1.90    1.21
  -5   1 -16    4.41    1.09
  -5   1 -17    3.55    0.97
  -5  -2  16    5.61    0.71
   5   2 -16    4.10    0.87
  -5  -2  15    3.68    0.78
  -5   2  15    5.11    0.79
   5   2 -15    6.16    1.04
  -5  -2  14   11.87    1.08
  -5   2  14   11.58    1.04
  -5  -2  13    0.13    0.78
  -5   2  13    1.16    0.82
  -5  -2  13   -0.09    0.99
  -5  -2  12    2.02    0.88
  -5   2  12    0.69    0.83
   5   2 -12    0.44    0.98
  -5  -2  12   -0.65    1.09
  -5  -2  11    0.51    0.84
  -5   2  11    0.51    0.85
   5   2 -11   -0.65    0.98
  -5  -2  11   -0.19    1.09
  -5  -2  10    6.80    1.04
   5   2 -10    7.07    1.16
  -5  -2  10    8.61    1.30
  -5  -2   9    0.83    0.89
   5   2  -9    0.92    1.04
  -5  -2   9    1.72    1.09
   5   2  -9    0.10    0.95
  -5  -2   8    4.98    1.02
  -5  -2   8    6.12    1.14
   5   2  -8    5.02    1.12
  -5  -2   7    3.97    0.94
  -5   2   7    2.45    1.01
   5   2  -7    2.32    0.95
  -5  -2   6    2.89    0.92
   5   2  -6    3.36    0.94
  -5  -2   5    4.93    1.04
  -5   2   5    3.46    0.96
  -5  -2   5    4.28    1.32
  -5   2   5    3.20    1.17
  -5  -2   5    4.37    1.30
   5   2  -5    5.45    1.00
  -5  -2   4    5.52    1.05
  -5   2   4    4.43    1.05
  -5  -2   4    4.84    1.34
   5   2  -4    5.18    0.96
  -5   2   3   23.01    1.58
  -5  -2   3   22.01    2.08
   5   2  -3   21.12    1.47
  -5   2   2  100.74    3.98
  -5  -2   2   89.59    4.57
   5   2  -2   92.38    3.77
  -5   2   1    7.80    1.25
  -5  -2   1    8.42    1.56
   5   2  -1    7.63    1.23
   5   2  -1    9.00    1.02
  -5   2   0    1.18    1.16
  -5  -2   0    0.19    1.19
   5   2   0   -0.71    1.22
   5   2   0    0.27    1.02
   5   2   0   -0.07    0.70
  -5   2  -1    9.20    1.42
   5   2   1    6.35    1.31
   5   2   1    6.99    1.14
  -5   2  -1    9.88    1.45
   5  -2   2   92.50    3.94
  -5   2  -2  101.16    4.21
   5   2   2   96.61    4.11
   5   2   2   98.88    4.86
  -5  -2  -2   92.04    4.80
   5   2   2  101.08    4.06
  -5   2  -2   99.72    4.28
   5  -2   3   21.09    1.61
  -5   2  -3   19.36    1.77
   5   2   3   26.98    1.85
   5   2   3   18.91    2.18
   5   2   3   22.74    1.67
  -5  -2  -3   21.81    2.28
  -5   2  -3   26.17    2.01
   5  -2   4    5.41    1.18
  -5   2  -4    6.60    1.44
   5   2   4    5.51    1.29
  -5   2  -4    4.19    1.44
   5   2   4    2.49    1.53
  -5  -2  -4    4.41    1.59
   5   2   4    6.85    1.19
   5  -2   5    4.24    1.08
  -5   2  -5    5.23    1.41
   5   2   5    4.79    1.24
   5   2   5    4.50    1.68
  -5  -2  -5    3.21    1.57
  -5   2  -5    5.47    1.49
  -5   2  -6    4.16    1.42
   5  -2   6    3.10    1.08
   5   2   6    3.01    1.24
   5   2   6    2.89    1.65
  -5  -2  -6    2.37    1.47
  -5   2  -6    3.16    1.45
   5  -2   7    3.04    1.04
  -5   2  -7    4.27    1.40
   5   2   7    3.05    1.27
   5  -2   7    1.21    1.03
  -5   2  -7    0.78    1.54
   5  -2   8    6.09    1.19
  -5   2  -8    5.47    1.38
   5   2   8    4.24    1.30
  -5   2  -8    7.76    1.72
  -5   2  -9    0.13    1.52
   5  -2   9    1.21    1.00
   5   2   9    2.11    1.20
  -5   2 -10    8.56    1.62
   5  -2  10    6.88    1.17
   5   2  10    8.38    1.41
  -5   2 -11    0.49    1.35
   5  -2  11   -0.16    0.94
  -5   2 -12    2.41    1.41
   5  -2  12    1.17    0.91
   5   2  12    0.28    1.06
  -5   2 -13    0.63    1.21
   5  -2  13    1.57    0.87
   5   2  13    0.44    1.01
  -5   2 -14    9.52    1.40
   5   2  14   13.34    1.29
   5   2  15    5.42    0.97
  -5   2 -15    6.59    1.18
   5   2  16    7.76    0.92
  -5   2 -16    7.17    1.05
  -5  -3  15    0.19    0.55
  -5   3  15    0.98    0.58
  -5  -3  14    5.24    0.76
  -5   3  14    6.01    0.77
  -5  -3  13   11.27    1.01
  -5   3  13   10.02    0.98
  -5  -3  12   19.58    1.26
  -5   3  12   15.44    1.23
   5   3 -12   15.69    1.35
  -5  -3  11    3.19    0.89
  -5   3  11    0.89    0.83
   5   3 -11    1.58    0.97
  -5  -3  10    7.01    1.06
  -5   3  10    5.64    0.95
   5   3 -10    5.22    1.07
  -5  -3   9   14.84    1.31
  -5   3   9   16.36    1.28
   5   3  -9   15.10    1.43
  -5  -3   8    7.03    1.10
  -5   3   8    6.06    0.96
   5   3  -8    6.94    1.13
   5   3  -8    6.90    1.14
  -5  -3   7    0.56    0.94
  -5   3   7    1.81    0.84
   5   3  -7    1.49    1.00
   5   3  -7    0.66    1.00
  -5  -3   6    8.26    1.15
  -5   3   6    7.90    1.10
   5   3  -6    8.08    1.18
   5   3  -6    8.42    1.22
  -5  -3   5   38.66    2.02
  -5   3   5   35.27    1.96
   5   3  -5   32.38    1.94
   5   3  -5   33.33    1.97
  -5  -3   4   54.77    2.73
  -5   3   4   59.55    2.73
   5   3  -4   63.10    2.75
   5   3  -4   61.34    2.76
  -5   3   3    0.75    0.98
   5   3  -3   -0.16    0.82
  -5   3   2    6.28    1.12
   5   3  -2    6.29    0.96
  -5   3   1    5.23    1.12
  -5   3   0    0.83    1.03
  -5   3  -1    5.01    1.20
   5   3   1    3.33    1.32
  -5   3  -2    8.37    1.34
   5   3   2    7.59    1.47
  -5   3  -3    0.30    1.17
   5   3   3    0.11    1.26
  -5   3  -4   59.06    3.06
   5   3   4   70.94    3.28
   5  -3   5   39.30    2.18
  -5   3  -5   38.46    2.33
   5   3   5   37.19    2.40
   5  -3   6    8.92    1.24
   5   3   6    8.42    1.44
   5  -3   7    1.53    1.07
   5   3   7    1.64    1.28
   5  -3   8   10.84    1.25
   5   3   8    7.82    1.45
   5  -3   9   14.78    1.40
   5   3   9   16.71    1.67
   5  -3  10    5.87    1.10
   5   3  10    6.92    1.34
   5  -3  11    1.99    0.95
   5   3  11    2.41    1.13
   5  -3  12   18.38    1.35
   5   3  12   15.22    1.46
   5  -3  13   13.41    1.12
   5   3  13   10.29    1.20
   5  -3  14    9.11    0.90
   5   3  14    9.24    1.08
   5   3  15    0.11    0.72
  -5  -4  13    0.56    0.53
  -5   4  13    0.73    0.57
  -5  -4  12    1.13    0.60
  -5   4  12    0.44    0.65
  -5  -4  11    0.73    0.69
  -5   4  11   -0.39    0.70
  -5  -4  10    0.94    0.71
  -5   4  10    0.49    0.73
  -5  -4   9   10.65    1.11
  -5   4   9   10.36    1.05
  -5  -4   8    7.45    1.03
  -5   4   8    5.40    0.91
  -5  -4   7   23.43    1.49
  -5   4   7   21.29    1.43
   5   4  -7   19.05    1.50
  -5   4   6   26.84    1.68
   5   4  -6   27.41    1.73
  -5  -4   5    2.23    0.98
  -5   4   5    0.08    0.86
   5   4  -5    1.37    0.91
  -5  -4   4    4.98    1.08
  -5   4   4    3.62    1.05
  -5   4   4    3.73    1.01
  -5   4   3  107.87    4.31
  -5   4   3  107.07    4.30
   5   4  -3  111.26    4.28
  -5   4   2   16.85    1.41
  -5   4   2   16.83    1.40
  -5   4   1   34.89    1.94
  -5   4   0    2.08    1.02
  -5   4  -1   33.46    1.93
  -5   4  -2   15.11    1.39
   5   4   3  119.68    5.01
   5   4   4    3.70    1.41
   5   4   5    1.64    1.29
   5   4   6   31.32    2.11
   5  -4   7   23.38    1.61
   5   4   7   25.91    1.87
   5  -4   8    6.15    1.08
   5   4   8    6.54    1.29
   5  -4   9    9.42    1.10
   5   4   9    8.45    1.27
   5  -4  10   -0.27    0.79
   5   4  10    0.49    0.97
   5  -4  11    1.70    0.80
   5   4  11   -0.37    0.92
   5  -4  12    0.86    0.71
   5   4  12   -0.26    0.83
   5  -4  13    1.18    0.63
   5   4  13   -0.05    0.71
  -5   5  11    0.20    0.47
  -5  -5  10    5.67    0.64
  -5   5  10    5.44    0.67
  -5  -5   9    2.26    0.61
  -5   5   9    1.82    0.61
  -5  -5   8   28.90    1.44
  -5   5   8   29.10    1.47
  -5  -5   7    3.13    0.75
  -5   5   7    2.60    0.75
  -5  -5   6    3.12    0.82
  -5   5   6    2.92    0.76
  -5  -5   5   12.49    1.08
  -5   5   5   13.17    1.12
  -5  -5   4    1.32    0.81
  -5   5   4    1.02    0.80
  -5  -5   3    1.46    0.85
  -5   5   3   -0.21    0.82
  -5  -5   2    0.29    0.87
  -5   5   2    1.10    0.84
  -5   5   1    1.36    0.89
  -5   5   0    1.69    0.92
  -5   5  -1    1.62    0.89
  -5   5  -2   -0.38    0.83
  -5   5  -3    1.29    1.08
  -5   5  -4    1.43    1.11
  -5   5  -5   14.37    1.40
  -5   5  -6    2.07    1.03
  -5   5  -7    3.20    1.04
  -5   5  -8   30.50    1.76
   5  -5   9    2.99    0.76
  -5   5  -9    3.99    0.90
  -5   5 -10    5.15    0.83
  -5   6   6    2.32    0.52
  -5   6   5    2.78    0.57
  -5   6   4    9.58    0.79
  -5   6   3    0.72    0.57
  -5  -6   2    0.21    0.56
  -5   6   2    0.56    0.60
  -5  -6   1   -0.18    0.60
  -5   6   1    1.02    0.61
  -5  -6   0    0.05    0.65
  -5   6   0    0.39    0.63
  -5  -6  -1    0.14    0.63
  -5   6  -1    1.37    0.64
  -5   6  -2    0.24    0.59
  -5   6  -3    0.50    0.58
  -5   6  -4    4.92    0.66
   5  -6   5    1.25    0.62
   5  -6   6    2.34    0.61
  -6   0  15    0.05    0.65
  -6   0  14    2.13    0.83
  -6   0  13   -0.07    0.88
  -6   0  12    3.55    0.97
  -6   0  11   -0.56    0.93
  -6   0  10   17.81    1.48
  -6   0   9    1.33    1.03
  -6   0   8   60.34    2.79
  -6   0   7    0.17    0.99
  -6   0   6  105.47    4.23
  -6   0   5    2.15    1.05
   6   0  -5    0.44    0.97
  -6   0   4   56.64    2.63
   6   0  -4   52.72    2.63
   6   0  -3    0.26    0.91
   6   0  -2    1.32    0.95
   6   0  -1   -0.59    1.12
   6   0  -1    0.61    0.85
   6   0   0   24.65    1.77
   6   0   0   22.11    1.62
   6   0   1    0.69    1.13
   6   0   1    0.52    0.88
   6   0   2    1.69    1.09
   6   0   2    2.55    0.88
  -6   0  -2    1.42    1.32
  -6   0  -3   -0.22    1.31
  -6   0  -3   -0.67    1.31
   6   0   3   -0.60    1.07
   6   0   3    0.08    0.83
   6   0   4   62.38    3.03
   6   0   4   64.85    2.81
   6   0   5   -0.20    1.13
  -6   0  -5    0.35    1.27
   6   0   6  106.56    4.38
  -6   0  -6  101.91    4.55
  -6   0  -7    0.49    1.32
  -6   0  -8   60.77    3.15
  -6   0  -9    1.54    1.31
  -6   0 -10   20.75    1.84
  -6   0 -11   -0.42    1.14
  -6   0 -12    4.41    1.25
  -6   0 -13    2.13    1.08
  -6   0 -14    3.06    1.02
  -6   0 -15   -1.04    0.87
  -6  -1  15   45.27    1.90
  -6   1  15   43.37    1.89
  -6  -1  14   16.84    1.22
  -6  -1  13   12.79    1.21
   6   1 -12   21.10    1.50
  -6  -1  12   19.89    1.52
  -6   1  12   23.37    1.47
   6   1 -11   28.70    1.80
  -6  -1  11   30.16    1.82
  -6   1  11   27.30    1.70
  -6  -1  10   12.02    1.29
  -6   1  10    8.35    1.17
  -6  -1   9   34.88    2.01
  -6   1   9   36.30    1.99
  -6  -1   8    3.26    1.09
  -6   1   8    4.20    1.05
  -6  -1   7    4.04    1.04
   6   1  -7    5.26    1.08
  -6  -1   6    9.53    1.18
  -6   1   6    8.59    1.22
   6   1  -6    7.41    1.13
   6   1  -5   41.97    2.24
   6   1  -4   38.02    2.09
   6   1  -3    3.06    0.98
   6  -1  -3    3.98    1.01
   6   1  -2   22.87    1.73
   6   1  -2   22.62    1.57
   6  -1  -2   19.72    1.52
   6   1  -1   54.26    2.81
   6   1  -1   56.01    2.62
   6  -1  -1   54.76    2.64
  -6   1   0   52.60    2.81
   6   1   0   60.58    2.86
   6  -1   0   58.89    2.83
   6   1   0   53.86    2.61
  -6   1  -1   64.15    3.10
   6   1   1   58.89    2.96
   6  -1   1   58.78    2.92
   6   1   1   61.31    2.76
  -6   1  -2   24.49    1.98
   6   1   2   24.63    1.87
   6  -1   2   25.05    1.77
   6   1   2   24.31    1.59
  -6   1  -2   25.26    2.05
  -6   1  -3    3.82    1.48
   6   1   3    3.15    1.29
   6  -1   3    4.51    1.24
  -6   1  -3    3.26    1.49
  -6   1  -4   44.58    2.66
   6   1   4   42.77    2.43
   6  -1   4   43.48    2.44
  -6   1  -4   51.80    2.83
   6  -1   5   39.46    2.29
  -6   1  -5   40.40    2.58
   6   1   5   44.24    2.37
   6  -1   5   43.11    2.35
  -6   1  -5   45.08    2.74
   6  -1   6    5.66    1.20
  -6   1  -6    7.90    1.58
   6   1   6    9.89    1.36
   6  -1   6    8.19    1.30
  -6   1  -6   11.22    1.70
   6  -1   7    4.91    1.19
  -6   1  -7    6.15    1.50
   6  -1   7    5.89    1.21
  -6   1  -7    4.58    1.60
   6  -1   8    1.41    1.07
  -6   1  -8    2.12    1.34
  -6   1  -8    1.94    1.54
   6  -1   9   38.59    2.05
  -6   1  -9   41.33    2.52
   6  -1  10   13.78    1.31
  -6   1 -10    8.61    1.42
  -6   1 -10   12.18    1.65
  -6   1 -11   24.40    1.88
  -6   1 -11   28.82    2.04
  -6   1 -12   22.48    1.72
  -6   1 -12   27.86    1.91
  -6   1 -13   17.25    1.47
  -6   1 -13   18.64    1.52
  -6   1 -14   34.07    1.89
  -6   1 -15   36.13    1.85
  -6  -2  14    1.08    0.51
  -6  -2  13    2.20    0.65
  -6  -2  12    2.28    0.70
   6   2 -12    1.05    0.85
  -6  -2  12    1.41    0.89
  -6  -2  11    0.90    0.71
   6   2 -11    1.63    0.89
  -6  -2  11    0.23    0.91
  -6  -2  10    1.52    0.77
   6   2 -10    2.58    0.99
  -6  -2  10    0.90    0.99
  -6  -2   9    0.26    0.80
   6   2  -9    0.52    0.97
   6   2  -9    2.22    0.99
   6   2  -8   18.66    1.50
  -6   2   8   18.28    1.39
   6   2  -8   20.62    1.54
  -6   2   7    0.64    0.92
   6   2  -7    0.65    0.92
  -6   2   6   47.72    2.32
   6   2  -6   43.13    2.31
   6   2  -5    0.27    0.92
  -6   2   4    3.32    0.97
   6   2  -4    3.82    1.00
  -6   2   3   16.85    1.46
   6   2  -3   17.98    1.43
  -6   2   2   30.49    1.92
   6   2  -2   29.85    1.78
  -6   2   1   50.09    2.65
   6   2  -1   54.20    2.48
  -6   2   0    0.70    1.15
   6  -2   0    1.46    1.07
   6   2   0    2.00    0.81
  -6   2  -1   59.56    2.93
   6  -2   1   55.09    2.81
  -6   2  -2   33.43    2.19
   6   2   2   30.95    2.04
   6  -2   2   32.47    2.03
   6  -2   3   15.41    1.55
  -6   2  -3   18.15    1.80
   6   2   3   19.47    1.67
   6  -2   3   17.77    1.62
  -6   2  -3   18.74    1.88
   6  -2   4    4.70    1.27
  -6   2  -4    7.03    1.48
   6  -2   4    6.61    1.27
  -6   2  -4    4.03    1.51
   6  -2   5    0.29    1.07
  -6   2  -5   -0.11    1.25
   6  -2   5    0.49    1.06
  -6   2  -5   -1.02    1.38
   6  -2   6   55.88    2.65
  -6   2  -6   44.54    2.69
   6  -2   6   52.28    2.64
  -6   2  -6   51.15    2.95
  -6   2  -7    1.58    1.20
   6  -2   7    1.92    1.13
   6  -2   7    2.57    1.04
  -6   2  -7    0.38    1.31
   6  -2   8   20.27    1.67
  -6   2  -8   22.06    1.79
   6  -2   8   23.38    1.70
  -6   2  -8   24.45    1.96
   6  -2   9    0.08    0.96
  -6   2  -9    1.70    1.17
  -6   2  -9    3.14    1.39
   6  -2  10    1.95    1.00
  -6   2 -10    2.71    1.11
  -6   2 -10    2.69    1.32
   6  -2  11    0.21    0.89
  -6   2 -11    3.80    1.24
   6  -2  12    2.21    0.87
  -6   2 -12    1.04    1.05
  -6   2 -13    4.15    1.01
  -6   2 -14    1.92    0.85
  -6  -3  13    1.14    0.51
  -6  -3  12    5.15    0.70
  -6  -3  11    3.04    0.71
   6   3 -11    2.85    0.82
  -6  -3  10   31.12    1.58
   6   3 -10   31.02    1.73
  -6  -3   9   47.38    2.16
   6   3  -9   49.33    2.32
  -6  -3   8   17.83    1.25
   6   3  -8   18.28    1.42
  -6  -3   7    0.33    0.79
   6   3  -7    1.54    0.90
   6   3  -7    1.02    0.89
  -6  -3   6    5.16    0.99
   6   3  -6    6.81    1.11
   6   3  -6    7.08    1.16
  -6  -3   5  132.76    4.94
  -6   3   5  130.57    4.99
   6   3  -5  127.65    5.02
   6   3  -5  129.62    5.06
  -6  -3   4   34.54    1.92
  -6   3   4   34.88    1.97
   6   3  -4   37.58    2.03
  -6  -3   3   51.28    2.50
  -6   3   3   57.94    2.65
   6   3  -3   55.54    2.57
  -6  -3   2  167.78    6.50
  -6   3   2  189.68    6.68
   6   3  -2  178.37    6.56
  -6   3   1  203.06    7.40
   6   3  -1  200.15    7.29
  -6   3   0  392.25   13.64
  -6   3  -1  210.39    7.91
   6  -3   1  221.48    7.97
  -6   3  -2  171.00    6.68
   6  -3   2  182.97    6.75
  -6   3  -3   57.86    2.87
   6  -3   3   58.74    2.86
  -6   3  -4   33.48    2.08
   6   3   4   36.66    2.31
   6  -3   4   34.15    2.11
   6  -3   5  143.80    5.54
  -6   3  -5  140.57    5.54
   6   3   5  150.51    5.75
   6  -3   5  133.53    5.54
  -6   3  -5  154.59    5.80
   6  -3   6    6.98    1.24
  -6   3  -6    7.33    1.23
   6   3   6    7.71    1.39
   6  -3   6    7.53    1.25
  -6   3  -6    7.32    1.46
   6  -3   7    1.53    1.00
  -6   3  -7   -0.08    0.98
   6   3   7    0.20    1.08
   6  -3   7    2.20    1.04
  -6   3  -7   -0.84    1.16
   6  -3   8   21.09    1.52
   6   3   8   17.66    1.62
   6  -3   8   19.27    1.53
   6  -3   9   48.82    2.33
   6   3   9   47.30    2.46
   6  -3   9   51.29    2.38
  -6   3  -9   46.25    2.46
   6  -3  10   33.76    1.77
   6   3  10   32.73    1.85
  -6   3 -10   29.87    1.87
   6  -3  11    1.92    0.78
   6   3  11    2.60    0.90
   6  -3  12    4.16    0.79
   6   3  12    4.61    0.87
   6   3  13    0.63    0.64
  -6  -4  11    6.08    0.62
  -6  -4  10    0.51    0.54
  -6  -4   9    0.68    0.59
  -6  -4   8    2.46    0.71
  -6  -4   7   12.26    1.01
  -6  -4   6    4.14    0.85
  -6  -4   5   17.29    1.23
  -6  -4   4    0.13    0.79
  -6  -4   3    5.92    0.99
  -6   4   3    6.47    0.98
  -6  -4   2   17.02    1.33
  -6   4   2   18.16    1.34
  -6  -4   1    6.15    1.06
  -6   4   1    8.41    1.10
  -6   4   0    4.84    0.93
  -6   4  -1    5.95    1.04
   6  -4   1    6.75    1.19
  -6   4  -2   15.64    1.30
   6  -4   2   16.30    1.47
  -6   4  -3    5.22    0.95
   6  -4   3    6.44    1.16
   6  -4   4    1.27    0.99
   6  -4   5   15.22    1.38
   6  -4   6    4.51    1.00
   6  -4   7   11.85    1.15
   6  -4   8    2.62    0.83
   6  -4   8    3.03    0.89
   6  -4   9    0.22    0.70
   6   4   9   -0.39    0.85
   6  -4   9    1.58    0.76
   6  -4  10    1.61    0.67
   6  -4  11    5.41    0.69
  -6  -5   7    0.14    0.48
  -6   5   7    0.62    0.48
  -6  -5   6   22.29    1.14
  -6   5   6   21.51    1.13
  -6  -5   5    2.57    0.61
  -6  -5   4   18.28    1.09
  -6  -5   3    1.03    0.65
  -6  -5   2    0.93    0.68
  -6  -5   1    2.78    0.78
  -6  -5   0    4.75    0.79
  -6  -5  -1    2.85    0.78
   6  -5   3    0.90    0.76
   6  -5   4   16.50    1.17
   6  -5   5    3.42    0.77
   6  -5   6   20.29    1.23
   6  -5   7    0.62    0.64
  -7   0  13   -0.04    0.58
  -7   0  12    1.51    0.73
  -7   0  11    1.35    0.77
  -7   0  10   42.33    2.03
  -7   0   9    0.54    0.82
  -7   0   8    0.71    0.86
  -7   0   7    1.03    0.85
  -7   0   6   26.86    1.67
  -7   0   5    0.08    0.89
   7   0  -5    0.50    0.84
  -7   0   4   21.32    1.52
   7   0  -4   22.52    1.52
  -7   0   3   -0.23    0.88
   7   0  -3   -1.13    0.85
   7   0  -2   33.48    1.94
   7   0  -1   -0.61    1.07
   7   0  -1    0.18    0.86
   7   0   0   -0.72    1.15
   7   0   0    0.53    0.88
   7   0   1   -1.74    1.10
   7   0   1   -0.26    0.86
   7   0   2   40.74    2.30
   7   0   2   36.80    2.05
   7   0   3   -0.80    1.13
   7   0   3    0.65    0.85
   7   0   4   19.15    1.66
   7   0   4   20.10    1.41
  -7   0  -5    1.16    1.27
   7   0   5    0.29    1.05
  -7   0  -6   23.70    1.89
   7   0   6   23.39    1.74
  -7   0  -7    0.30    1.15
   7   0   7    0.35    1.01
  -7   0  -8    2.06    1.16
  -7   0  -9    1.21    1.13
  -7   0 -10   41.14    2.17
  -7   0 -11    0.56    0.90
  -7   0 -12    0.36    0.82
  -7   0 -13   -0.74    0.72
   7   1 -12    0.88    0.66
  -7  -1  12    0.30    0.68
   7   1 -11    0.53    0.71
  -7  -1  11    0.40    0.76
  -7   1  11    0.05    0.68
   7   1 -10   12.70    1.13
  -7  -1  10   12.96    1.15
  -7   1  10   12.59    1.08
   7   1  -9    9.10    1.10
  -7  -1   9    8.16    1.02
  -7   1   9    9.73    1.06
  -7  -1   8    1.61    0.86
  -7   1   8    2.85    0.90
  -7  -1   7    5.37    1.00
  -7   1   7    6.51    0.98
   7   1  -7    4.77    0.98
  -7   1   6    2.30    0.95
   7   1  -6    3.39    0.95
  -7   1   5    0.85    0.97
   7   1  -5    2.38    0.91
  -7   1   4    2.30    0.98
   7   1  -4    3.27    0.96
   7   1  -3    0.35    0.87
   7  -1  -3    0.42    0.82
   7   1  -2    9.91    1.14
   7  -1  -2    9.08    1.17
   7   1  -1   -0.10    1.09
   7   1  -1    0.17    0.87
   7  -1  -1    0.35    0.86
   7   1   0   -0.41    1.12
   7  -1   0    0.99    1.06
   7   1   0    0.67    0.83
   7  -1   0   -0.53    0.90
  -7   1  -1    0.38    1.14
   7   1   1    0.82    1.13
   7  -1   1    1.30    1.11
   7   1   1    0.90    0.86
   7  -1   1    1.24    0.89
  -7   1  -2   10.06    1.37
   7   1   2    8.41    1.35
   7  -1   2    9.99    1.37
   7   1   2    8.43    1.06
   7  -1   2    9.52    1.16
  -7   1  -3    0.10    1.20
   7   1   3    0.10    1.11
   7  -1   3   -2.15    1.10
   7  -1   3    1.02    0.90
  -7   1  -4    4.39    1.32
   7   1   4    3.02    1.15
   7  -1   4    2.78    1.16
   7  -1   4    1.48    0.90
  -7   1  -5    3.19    1.30
   7   1   5    0.94    1.09
   7  -1   5    0.75    1.05
   7  -1   5    0.39    0.79
  -7   1  -5   -1.13    1.29
  -7   1  -6    2.82    1.23
   7   1   6    3.68    1.12
   7  -1   6    2.35    1.04
   7  -1   6    3.10    0.84
  -7   1  -6    3.00    1.30
  -7   1  -7    4.00    1.21
   7  -1   7    5.33    1.10
  -7   1  -7    5.52    1.34
  -7   1  -8    1.51    1.10
  -7  -1  -8    0.53    1.12
  -7   1  -8    2.59    1.18
  -7   1  -9    9.25    1.25
  -7  -1  -9    8.96    1.25
  -7   1  -9   12.72    1.39
  -7   1 -10   12.15    1.24
  -7  -1 -10    8.42    1.18
  -7   1 -10   12.45    1.26
  -7   1 -11    1.66    0.86
  -7  -1 -11    1.95    0.92
  -7   1 -11    1.54    0.86
  -7   1 -12    2.78    0.78
  -7  -1 -12    0.90    0.79
  -7   1 -12    0.23    0.73
   7   2 -11    1.36    0.68
   7   2 -10    8.09    0.91
   7   2  -9   -0.20    0.77
  -7   2   9    0.27    0.68
   7   2  -8    3.07    0.85
  -7   2   8    2.79    0.79
   7   2  -8    1.47    0.79
   7   2  -7    2.41    0.88
  -7   2   7    1.13    0.81
   7   2  -7    1.35    0.80
   7   2  -6   -1.12    0.85
  -7   2   6   -0.67    0.83
   7   2  -6    0.55    0.86
   7   2  -5    3.53    0.91
  -7   2   5    1.93    0.89
   7   2  -5    3.15    0.91
   7   2  -4   60.01    2.72
   7   2  -3    5.06    0.99
  -7   2   2   10.23    1.13
   7   2  -2   11.62    1.16
  -7   2   1    3.49    0.98
   7   2  -1    1.82    0.79
   7  -2  -1    2.24    0.90
  -7   2   0   -0.17    0.97
   7  -2   0    1.03    1.02
   7   2   0   -0.15    0.79
   7  -2   0   -0.17    0.86
  -7   2  -1    2.33    1.10
   7  -2   1    2.55    1.09
   7  -2   1    1.99    0.96
  -7   2  -2   11.62    1.36
   7  -2   2    9.14    1.26
   7  -2   2   11.20    1.22
  -7   2  -3    4.21    1.18
   7  -2   3    3.61    1.10
  -7   2  -4   58.63    2.83
   7  -2   4   57.67    2.77
  -7   2  -5    1.89    1.11
   7  -2   5    3.86    1.10
  -7   2  -6   -0.34    1.03
   7  -2   6    0.08    0.93
  -7   2  -7    0.95    0.96
   7  -2   7    1.96    0.96
  -7   2  -7    2.02    1.10
  -7   2  -8    1.60    0.97
   7  -2   8    4.25    0.97
   7  -2   8    1.70    0.74
  -7   2  -8    2.30    1.06
  -7   2  -9    0.07    0.83
  -7   2  -9   -0.08    0.97
  -7   2 -10    8.36    0.93
  -7   2 -10    5.83    1.02
  -7   2 -11    1.35    0.76
   7   3  -9    1.08    0.63
   7   3  -8   -0.32    0.66
   7   3  -7   23.97    1.40
   7   3  -6    5.77    0.87
   7   3  -6    8.75    0.97
  -7   3   5    4.42    0.83
   7   3  -5    4.72    0.87
  -7   3   4    4.71    0.85
  -7   3   4    4.99    0.90
   7   3  -4    4.05    0.86
  -7   3   3   80.15    3.23
   7   3  -3   80.40    3.28
  -7   3   2    1.01    0.82
   7   3  -2    1.45    0.84
  -7   3   1   42.93    2.11
  -7   3   0    2.53    0.94
  -7   3  -1   42.72    2.14
   7  -3   1   46.92    2.28
   7  -3   1   41.50    2.13
  -7   3  -2    1.55    0.92
   7  -3   2    1.66    1.00
  -7   3  -3   76.35    3.19
   7  -3   3   75.12    3.26
  -7   3  -4    4.76    0.96
   7  -3   4    4.89    1.10
  -7   3  -5    3.89    0.91
   7  -3   5    4.13    1.00
  -7   3  -6    6.86    0.93
   7  -3   6    7.44    1.06
  -7   3  -7   25.84    1.44
   7  -3   7   26.02    1.54
   7  -3   8    0.63    0.77
   7  -3   9    2.06    0.57
  -7  -4   6    1.39    0.53
  -7  -4   5    3.02    0.58
  -7  -4   4    2.65    0.60
  -7  -4   3    1.57    0.59
  -7  -4   2    0.79    0.59
  -7  -4   1    2.12    0.63
  -7   4   1    1.43    0.70
  -7   4   0    0.67    0.66
  -7   4  -1    1.71    0.68
  -7   4  -2    1.51    0.64
   7  -4   2    0.98    0.75
  -7   4  -3    2.62    0.65
   7  -4   3    1.50    0.78
   7  -4   3    3.64    0.72
  -7   4  -4    3.26    0.64
   7  -4   4    3.04    0.83
   7  -4   5    3.16    0.77
   7  -4   6   -0.10    0.65
   8   0  -9    0.69    0.58
  -8   0   9   -0.16    0.53
  -8   0   8    1.87    0.63
  -8   0   7    0.34    0.64
  -8   0   6    2.56    0.72
  -8   0   5   -0.32    0.67
   8   0  -5   -0.06    0.65
   8   0  -4    2.29    0.76
   8   0  -3    0.97    0.71
   8   0  -2   47.30    2.18
   8   0  -1    0.27    0.68
   8   0   0   47.20    2.46
   8   0   0   60.96    2.45
   8   0   1   -0.62    0.95
   8   0   1    0.39    0.70
   8   0   2   43.26    2.24
   8   0   2   48.90    2.13
   8   0   3    0.15    0.88
   8   0   3    1.18    0.69
   8   0   4    2.50    0.94
   8   0   4    1.64    0.68
   8   0   5    0.74    0.86
   8   0   6    1.62    0.80
  -8   0  -7    0.50    0.73
  -8   0  -8    2.01    0.73
  -8   0  -9   -0.34    0.61
   8   1  -8   11.03    0.91
  -8   1   8   11.68    0.87
   8   1  -7    2.56    0.68
  -8   1   7    2.01    0.67
   8   1  -6   24.94    1.38
  -8   1   6   24.09    1.33
   8   1  -6   25.04    1.35
   8   1  -5    1.68    0.69
  -8   1   5    1.46    0.72
   8   1  -5    1.35    0.70
  -8   1   4    5.87    0.84
   8   1  -4    4.88    0.81
  -8   1   3    0.90    0.75
   8   1  -3    1.40    0.74
   8  -1  -3    1.14    0.68
  -8   1   2    1.09    0.74
   8   1  -2    0.26    0.73
   8  -1  -2    0.19    0.68
  -8   1   1    1.10    0.75
   8   1  -1   -0.13    0.68
   8  -1  -1    0.26    0.70
  -8   1   0    8.22    0.93
   8  -1   0    6.71    1.08
   8   1   0    7.35    0.90
   8  -1   0    8.13    0.92
   8  -1   1    0.52    0.89
   8   1   1    0.24    0.65
   8  -1   1    1.50    0.75
   8  -1   2    0.22    0.88
   8   1   2    0.28    0.62
   8  -1   2    0.63    0.68
  -8   1  -3    2.25    0.85
   8  -1   3    0.79    0.89
   8  -1   3    1.21    0.70
  -8   1  -4    6.47    0.95
   8  -1   4    3.73    0.93
   8  -1   4    5.26    0.76
  -8   1  -5   -0.31    0.81
   8  -1   5    1.43    0.84
   8  -1   5   -0.05    0.59
  -8   1  -6   22.81    1.40
   8  -1   6   23.76    1.43
  -8   1  -7    2.64    0.77
   8  -1   7    2.72    0.77
  -8   1  -8   13.81    1.00
  -8   2   7    0.59    0.53
  -8   2   6   23.49    1.20
   8   2  -6   21.50    1.23
  -8   2   5    6.49    0.77
   8   2  -5    7.17    0.79
  -8   2   4   56.82    2.40
   8   2  -4   62.23    2.47
  -8   2   3   20.79    1.23
   8   2  -3   19.45    1.22
  -8   2   2   18.50    1.18
   8   2  -2   16.38    1.15
  -8   2   1    4.92    0.81
   8   2  -1    3.62    0.72
   8  -2  -1    4.01    0.75
  -8   2   0    0.21    0.66
   8   2   0    1.27    0.63
   8  -2   0    1.04    0.68
  -8   2  -1    1.85    0.77
   8  -2   1    4.06    0.92
   8  -2   1    3.51    0.78
  -8   2  -2   16.71    1.13
   8  -2   2   13.59    1.19
   8  -2   2   17.11    1.13
  -8   2  -3   18.77    1.20
   8  -2   3   19.80    1.20
  -8   2  -4   58.97    2.30
   8  -2   4   55.45    2.26
  -8   2  -5    6.06    0.79
   8  -2   5    5.52    0.88
   8  -2   5    5.85    0.73
  -8   2  -6   21.53    1.20
   8  -2   6   19.28    1.25
   8  -2   6   23.38    1.17
  -8   2  -7    0.24    0.56
  -8   3   3    0.89    0.55
  -8   3   2   34.87    1.57
  -8   3   1    9.34    0.76
  -8   3   1    9.03    0.80
  -8   3   0   10.48    0.83
  -8   3   0   11.78    0.87
  -8   3  -1   10.84    0.83
   8  -3   1   10.21    0.81
  -8   3  -2   27.90    1.29
   8  -3   2   29.19    1.32
  -8   3  -3    0.98    0.55
   8  -3   3    1.36    0.64
   8  -3   3    1.15    0.54
  -8   3  -4    6.17    0.63
   8  -3   4    5.47    0.62
   0   0   0    0.00    0.00


TITL UrAcDih_100K in P2(1)/c
REM P2(1)/c (#14 in standard setting)
CELL 1.54184   7.255890   6.366889  17.473942  90.0000  90.0363  90.0000
ZERR    4.00   0.000437   0.000381   0.001268   0.0000   0.0062   0.0000
LATT  1
SYMM -x, y+1/2,-z+1/2
SFAC C H N O
UNIT 20.00 40.00 12.00 20.00
TREF
HKLF 4
END
_computing_structure_solution     'SHELXT 2018/2 (Sheldrick, 2018)'
;
_shelx_hkl_checksum                79731
_olex2_submission_special_instructions  'No special instructions were received'
_oxdiff_exptl_absorpt_empirical_details
;
Empirical correction (ABSPACK) includes:
- Absorption correction using spherical harmonics
- Frame scaling
;
_oxdiff_exptl_absorpt_empirical_full_max  1.504
_oxdiff_exptl_absorpt_empirical_full_min  0.728
loop_
  _twin_individual_id
  _twin_individual_mass_fraction_refined
 1 0.457(5)
 2 0.543(5)
